# Supplementary material for: CLAMP and Zelda function together to promote Drosophila zygotic genome activation
Source: eLife journal article supplement (doi:10.7554/elife.69937), 2021-08-03
Supplement: supp [file elife-69937-supp-v1.zip]

Archive with 11 entries (11 files):
- elife_poa_e69937_Figure_1_figure_supplement_1.pdf
- elife_poa_e69937_Figure_2_figure_supplement_1.pdf
- elife_poa_e69937_Figure_3_figure_supplement_1.pdf
- elife_poa_e69937_Figure_3_figure_supplement_2.pdf
- elife_poa_e69937_Figure_3_figure_supplement_3.pdf
- elife_poa_e69937_Figure_5_figure_supplement_1.pdf
- elife_poa_e69937_Figure_1_source_data_1.zip
- elife_poa_e69937_Figure_2_source_data_1.xls
- elife_poa_e69937_Table_1_source_data_1.xlsx
- elife_poa_e69937_Table_2_source_data_1.xlsx
- elife_poa_e69937_Transparent_Reporting_File.pdf
