# Supplementary material for: CLAMP and Zelda function together to promote Drosophila zygotic genome activation
Source: eLife journal article supplement (doi:10.7554/elife.69937), 2021-08-03
Supplement: supp [file elife-69937-supp-v1.zip › elife_poa_e69937_Figure_2_source_data_1.xls]

## Sheet: CLAMP_MTD_CLAMPi_out_0-2hr_all
seqnames	start	end	width	strand	Conc	Conc_CLAMPi	Conc_MTD	Fold	p.value	FDR	CLRNAi_0.2hr_1	CLRNAi_0.2hr_2	CLRNAi_0.2hr_3	MTD_0.2hr_1	MTD_0.2hr_2	MTD_0.2hr_3	Called1	Called2	CLRNAi_0.2hr_1.1	CLRNAi_0.2hr_2.1	CLRNAi_0.2hr_3.1	MTD_0.2hr_1.1	MTD_0.2hr_2.1	MTD_0.2hr_3.1	anno_MTD_CLAMPi_all_gene
chr3L	40446	40646	201	*	4.81993	5.81993	0	8.16385	1.66869e-11	2.54325e-07	50.61	70.9	47.96	0	0	0	1	1	+	-	-	-	-	+
chr3R	26756419	26756619	201	*	4.88084	5.64684	3.14119	1.36825	9.8847e-08	0.000505421	59.46	57.14	33.7	7.54	10.34	8.59	1	3	+	-	-	+	+	+
chr2R	13562439	13562639	201	*	6.16718	4.43139	6.93251	-1.36798	9.94858e-08	0.000505421	30.36	20.11	14.26	102.56	172.63	91.26	1	1	+	-	-	+	-	-
chr3R	17666054	17666254	201	*	6.28917	4.64204	7.03825	-1.33343	1.86067e-07	0.000708961	32.89	26.46	15.56	116.13	177.8	100.39	1	2	-	+	-	-	+	+	CG14322
chr2R	15739374	15739574	201	*	5.0972	3.44082	5.84804	-1.32192	2.47844e-07	0.000755478	11.39	9.52	11.67	52.79	75.46	44.56	1	1	+	-	-	-	-	+	CG30089
chr4	989504	989704	201	*	6.71697	5.28851	7.42049	-1.27897	3.7732e-07	0.000958457	49.34	38.1	29.81	174.95	188.13	150.85	1	3	+	-	-	+	+	+	toy
chr3R	14373540	14373740	201	*	6.0509	4.6338	6.75181	-1.25712	6.32171e-07	0.00137642	26.57	23.28	24.63	92	140.58	90.73	0	3	-	-	-	+	+	+	NK7.1
chr2R	8866359	8866559	201	*	5.11495	3.50327	5.8572	-1.25937	9.08667e-07	0.00173112	15.18	8.47	10.37	48.26	82.7	42.95	2	1	+	+	-	-	-	+	RyR
chr2L	4045263	4045463	201	*	5.42639	4.03723	6.1208	-1.19705	2.40476e-06	0.00390478	22.77	14.82	11.67	54.29	86.83	67.64	1	1	+	-	-	-	+	-	ed
chrX	5560563	5560763	201	*	6.55944	5.0679	7.27697	-1.20063	2.63782e-06	0.00390478	45.55	31.75	23.33	135.74	224.31	105.22	2	2	-	+	+	-	+	+	Vsx2
chr2R	11795983	11796183	201	*	5.41337	4.01208	6.11061	-1.19141	2.81822e-06	0.00390478	24.04	12.7	11.67	52.79	85.8	68.72	3	0	+	+	+	-	-	-	ths
chr3R	2585942	2586142	201	*	6.05768	6.77646	4.56033	1.18697	3.5517e-06	0.00394039	51.87	122.75	154.25	30.16	18.61	22.01	0	3	-	-	-	+	+	+	Pzl
chrX	11197027	11197227	201	*	5.07524	5.88881	3.03093	1.1763	3.55873e-06	0.00394039	12.65	101.59	63.52	7.54	5.17	11.81	1	3	-	+	-	+	+	+
chr3L	12433885	12434085	201	*	5.19749	3.85276	5.8812	-1.17245	3.61954e-06	0.00394039	18.98	12.7	11.67	63.34	64.09	49.39	1	3	+	-	-	+	+	+	toe
chrX	13739621	13739821	201	*	6.1891	4.56139	6.93447	-1.18005	4.2391e-06	0.00430721	25.3	33.86	11.67	110.1	188.13	68.72	1	2	-	+	-	-	+	+	Grip91
chrX	1399727	1399927	201	*	5.36726	3.65873	6.12771	-1.16062	5.87235e-06	0.00546715	20.24	13.76	3.89	67.87	106.47	35.43	1	3	+	-	-	+	+	+
chr3L	24831066	24831266	201	*	6.28989	7.0023	4.82182	1.15665	6.09813e-06	0.00546715	61.99	173.55	149.07	25.64	23.78	35.43	3	3	+	+	+	+	+	+
chr2R	23236967	23237167	201	*	4.95417	3.38998	5.68694	-1.14729	7.57924e-06	0.00582331	8.86	14.82	7.78	55.8	70.29	28.45	1	1	+	-	-	+	-	-
chr2L	12616048	12616248	201	*	5.66668	4.45297	6.31638	-1.12192	7.84002e-06	0.00582331	24.04	22.22	19.44	60.33	83.73	95.02	1	3	-	+	-	+	+	+	Ref2
chr2L	20165932	20166132	201	*	5.77543	4.25567	6.49899	-1.14294	8.11969e-06	0.00582331	20.24	25.4	11.67	113.11	114.74	43.48	1	3	-	+	-	+	+	+
chr3R	24630083	24630283	201	*	6.2412	4.8793	6.92909	-1.13569	8.16833e-06	0.00582331	39.22	29.63	19.44	108.59	170.56	86.43	2	2	+	+	-	+	+	-	atl
chrX	12633968	12634168	201	*	5.07532	3.69541	5.76754	-1.13325	8.65771e-06	0.00582331	13.92	15.87	9.07	49.77	73.39	40.26	2	3	+	+	-	+	+	+	Tomosyn
chr3L	24283513	24283713	201	*	6.87576	7.58956	5.40136	1.13784	8.78788e-06	0.00582331	83.5	216.94	277.4	37.7	42.38	46.71	1	2	+	-	-	+	+	-	Snap25
chr3L	26467038	26467238	201	*	6.04	4.83247	6.68799	-1.10907	9.75724e-06	0.00619625	29.1	31.75	24.63	99.54	128.18	81.6	0	3	-	-	-	+	+	+
chr3L	14599599	14599799	201	*	6.0968	4.8675	6.75076	-1.10758	1.11261e-05	0.00644771	40.49	21.16	25.93	102.56	128.18	92.34	2	3	+	-	+	+	+	+	HGTX
chr3L	27453564	27453764	201	*	5.88591	6.55201	4.61088	1.11384	1.13506e-05	0.00644771	53.14	114.29	114.07	30.16	22.74	20.4	2	2	-	+	+	-	+	+
chr3R	14370187	14370387	201	*	6.2206	4.96693	6.8811	-1.10838	1.14224e-05	0.00644771	39.22	33.86	20.74	117.64	144.72	91.26	1	1	+	-	-	-	-	+	NK7.1
chr3R	9808989	9809189	201	*	6.12472	4.84546	6.79192	-1.10785	1.24447e-05	0.00677389	41.75	21.16	23.33	108.59	139.55	84.28	0	2	-	-	-	+	+	-	FBXO11
chrX	5382642	5382842	201	*	11.5345	12.3457	9.50717	1.08232	1.39829e-05	0.00734874	6203.22	2622.29	6789.8	570.1	409.35	1203.61	2	3	+	+	-	+	+	+	SK
chr3L	26470409	26470609	201	*	5.9695	4.71927	6.62908	-1.09453	1.48676e-05	0.00747342	27.83	31.75	19.44	116.13	113.71	67.11	3	3	+	+	+	+	+	+
chr3L	14131742	14131942	201	*	5.89078	4.5698	6.56862	-1.10041	1.52008e-05	0.00747342	27.83	31.75	11.67	95.02	118.88	70.86	1	1	+	-	-	-	+	-	Sox21b
chr2L	3611892	3612092	201	*	5.7804	4.64861	6.40675	-1.07438	1.65933e-05	0.00790308	18.98	26.46	29.81	78.43	82.7	93.41	1	1	+	-	-	-	+	-
chr3L	19791798	19791998	201	*	6.56458	5.37335	7.20804	-1.08173	1.71993e-05	0.00794345	53.14	34.92	36.3	137.25	186.07	120.25	1	3	+	-	-	+	+	+	SREBP
chr3L	5770925	5771125	201	*	5.74218	4.51426	6.39576	-1.0797	1.96771e-05	0.00882056	32.89	20.11	15.56	76.92	107.5	68.18	2	3	+	+	-	+	+	+	Ppat-Dpck
chr3L	732484	732684	201	*	5.23155	3.84991	5.92417	-1.08809	2.07813e-05	0.00893873	27.83	6.35	9.07	64.85	62.02	55.3	1	1	+	-	-	-	+	-
chr2R	13585074	13585274	201	*	4.94829	3.49181	5.65813	-1.08818	2.11137e-05	0.00893873	16.45	9.52	7.78	52.79	71.33	27.38	1	2	+	-	-	-	+	+	CG6191
chr3L	9442766	9442966	201	*	5.52306	4.27886	6.18102	-1.06441	2.73265e-05	0.0107988	26.57	14.82	16.85	78.43	92	47.24	1	2	-	+	-	-	+	+	Nf-YA
chr2L	19156935	19157135	201	*	6.63943	5.54454	7.25468	-1.0441	2.77627e-05	0.0107988	51.87	51.85	36.3	138.75	167.46	151.93	2	3	+	+	-	+	+	+	brat
chr3L	15141775	15141975	201	*	5.42336	4.21216	6.07237	-1.05968	2.78935e-05	0.0107988	22.77	21.16	11.67	60.33	87.86	53.68	1	1	-	+	-	-	-	+	Pex3
chr3L	21011068	21011268	201	*	6.59051	5.38698	7.2374	-1.05828	2.83415e-05	0.0107988	41.75	53.97	29.81	138.75	197.44	116.5	2	3	+	+	-	+	+	+	skd
chr3L	14463616	14463816	201	*	5.24294	3.97672	5.90674	-1.06233	2.93324e-05	0.0109038	18.98	12.7	15.56	63.34	79.59	37.04	0	3	-	-	-	+	+	+	bbg
chrX	2796445	2796645	201	*	6.41742	5.20127	7.06779	-1.05642	3.05917e-05	0.0111012	56.93	27.51	25.93	137.25	151.95	113.27	1	2	+	-	-	-	+	+	FBgn0003996
chr3R	16864901	16865101	201	*	5.84442	4.67159	6.48268	-1.04789	3.21448e-05	0.0112668	21.51	38.1	16.85	90.49	80.63	97.17	1	3	-	+	-	+	+	+	FBgn0264857
chr2L	19154905	19155105	201	*	7.35788	6.0341	8.03641	-1.06038	3.25267e-05	0.0112668	92.36	78.31	25.93	235.28	279.1	273.25	1	1	+	-	-	-	+	-	brat
chr3R	4835387	4835587	201	*	6.27422	4.99412	6.94164	-1.05245	3.58982e-05	0.0121583	43.02	37.04	15.56	113.11	163.32	92.34	3	3	+	+	+	+	+	+
chr2R	25255757	25255957	201	*	5.49138	4.37657	6.11267	-1.02285	4.54312e-05	0.0150525	17.71	26.46	18.15	64.85	84.76	57.98	2	3	+	+	-	+	+	+	CG9380
chr3L	8481233	8481433	201	*	5.73561	4.69901	6.33257	-1.00537	5.18771e-05	0.0168225	25.3	25.4	27.22	85.97	66.16	89.65	1	2	+	-	-	-	+	+	CG43163
chr3R	20829177	20829377	201	*	5.95246	4.68364	6.61694	-1.02938	5.35234e-05	0.0169948	34.16	33.86	9.07	85.97	119.91	88.58	1	2	-	+	-	-	+	+	FBgn0027493
chr3L	10850129	10850329	201	*	5.17382	4.07124	5.79142	-1.00515	6.20162e-05	0.0192896	12.65	22.22	15.56	60.33	53.75	52.07	1	3	+	-	-	+	+	+	tna
chr3R	21641832	21642032	201	*	6.39004	4.92633	7.10149	-1.01788	6.53776e-05	0.0199284	49.34	32.81	9.07	128.2	199.5	84.28	1	3	-	+	-	+	+	+	E2f1
chr3R	9440442	9440642	201	*	4.82624	3.53936	5.49542	-1.0147	6.9645e-05	0.0208129	3.8	11.64	19.44	51.28	47.55	36.51	3	3	+	+	+	+	+	+	ps
chr3R	8140053	8140253	201	*	6.41337	5.30962	7.03132	-0.999673	7.16348e-05	0.0209959	46.81	30.69	41.48	150.82	151.95	89.65	2	3	+	+	-	+	+	+	FBgn0011959
chr3R	7087063	7087263	201	*	5.91874	4.84378	6.52784	-0.994229	7.42126e-05	0.021341	40.49	27.51	18.15	87.47	101.3	88.04	1	1	+	-	-	-	-	+	alphaTub84B
chr2R	25255215	25255415	201	*	5.05053	3.93495	5.67205	-0.996362	7.79877e-05	0.0220113	11.39	13.76	20.74	55.8	55.82	41.34	1	3	-	+	-	+	+	+	CG9380
chr3R	1331034	1331234	201	*	6.10901	6.74202	4.95445	0.99746	8.45809e-05	0.0234381	54.4	139.69	127.03	36.2	29.98	26.84	2	3	+	+	-	+	+	+	Myo81F
chr3R	21499255	21499455	201	*	5.21573	4.03116	5.85731	-0.990935	9.49638e-05	0.0251504	21.51	15.87	11.67	73.9	65.12	34.89	2	3	+	+	-	+	+	+	C15
chr2L	18150068	18150268	201	*	5.82056	4.72568	6.43581	-0.983286	9.51493e-05	0.0251504	32.89	29.63	16.85	79.93	112.67	67.11	1	1	-	-	+	+	-	-	CG17681
chr3R	10111308	10111508	201	*	5.72574	4.6345	6.33987	-0.981937	9.67681e-05	0.0251504	24.04	34.92	15.56	64.85	99.24	78.92	0	2	-	-	-	-	+	+	Fmr1
chr3L	4108097	4108297	201	*	5.70035	4.65341	6.30063	-0.971889	0.000102606	0.0251504	22.77	30.69	22.04	85.97	92	58.52	2	3	+	+	-	+	+	+	Ack
chr2R	25225333	25225533	201	*	5.36077	4.28156	5.97119	-0.976533	0.000103219	0.0251504	11.39	27.51	19.44	58.82	69.26	60.13	1	1	-	+	-	-	+	-	Kr
chrX	18794807	18795007	201	*	5.23544	4.10843	5.86037	-0.982163	0.000103661	0.0251504	21.51	21.16	9.07	46.75	75.46	52.07	1	3	-	+	-	+	+	+	bnb
chr3L	432635	432835	201	*	5.53012	4.44523	6.1423	-0.977853	0.000103722	0.0251504	18.98	24.34	22.04	55.8	100.27	55.83	1	2	+	-	-	+	+	-
chrX	19773435	19773635	201	*	5.64187	4.52327	6.2643	-0.979921	0.000105128	0.0251504	24.04	30.69	14.26	72.39	101.3	56.91	3	1	+	+	+	-	+	-	zld
chr3L	539527	539727	201	*	6.37345	5.33632	6.97058	-0.97092	0.000105612	0.0251504	46.81	38.1	36.3	104.06	166.43	105.76	2	3	+	+	-	+	+	+	klar
chrX	11817270	11817470	201	*	5.09688	3.8863	5.74572	-0.982911	0.000112411	0.0261837	15.18	20.11	9.07	42.23	80.63	38.12	1	1	-	+	-	-	+	-	CG1578
chr3R	18072259	18072459	201	*	4.9138	3.61554	5.5859	-0.984331	0.000114302	0.0261837	7.59	20.11	9.07	25.64	46.52	71.94	3	2	+	+	+	-	+	+
chr3L	15142061	15142261	201	*	4.82468	3.69147	5.45144	-0.975492	0.000118443	0.0261837	13.92	10.58	14.26	43.74	54.79	32.75	2	0	+	-	+	-	-	-	Pex3
chr3R	16923631	16923831	201	*	5.92599	4.92896	6.50997	-0.958836	0.000118481	0.0261837	32.89	33.86	24.63	70.88	107.5	95.02	3	3	+	+	+	+	+	+	FBgn0264857
chr2L	13241810	13242010	201	*	5.96783	4.94568	6.5601	-0.962394	0.000118631	0.0261837	37.96	28.57	25.93	87.47	119.91	75.7	3	3	+	+	+	+	+	+	FBgn0003935
chr2L	19816719	19816919	201	*	5.47567	4.48627	6.05709	-0.958043	0.000120258	0.0261837	24.04	21.16	22.04	51.28	75.46	73.01	2	3	+	+	-	+	+	+	FBgn0003922
chr2L	19811775	19811975	201	*	5.59128	4.48717	6.20934	-0.968882	0.000127612	0.0268089	12.65	22.22	32.41	67.87	96.13	57.98	1	1	-	+	-	-	+	-	FBgn0003923
chr2L	16201432	16201632	201	*	4.97974	5.62387	3.78613	0.97582	0.000128079	0.0268089	29.1	82.54	36.3	13.57	16.54	11.27	1	1	+	-	-	+	-	-	FBgn0265949
chr2R	14621921	14622121	201	*	5.17933	4.13367	5.7792	-0.960197	0.000128586	0.0268089	17.71	23.28	11.67	54.29	58.92	51.54	0	2	-	-	-	-	+	+	CG12863
chr3L	27452219	27452419	201	*	5.50801	6.15381	4.30839	0.973242	0.000130166	0.0268089	35.43	106.88	71.29	13.57	21.71	24.16	3	2	+	+	+	+	+	-
chr3R	14722301	14722501	201	*	5.931	4.81825	6.55168	-0.965953	0.000135607	0.0275571	34.16	34.92	15.56	75.41	128.18	77.84	2	2	+	-	+	+	+	-	kibra
chr3L	886478	886678	201	*	5.40425	4.36833	6.00099	-0.957114	0.000138046	0.0276837	27.83	21.16	12.96	52.79	75.46	63.88	1	2	-	+	-	-	+	+	Usp10
chr3L	3148526	3148726	201	*	5.03001	3.95667	5.63862	-0.957501	0.000146062	0.0283792	16.45	15.87	14.26	46.75	65.12	37.58	1	3	+	-	-	+	+	+	Usp5
chr3R	16902118	16902318	201	*	5.49376	4.44585	6.09435	-0.956458	0.000146954	0.0283792	32.89	16.93	15.56	52.79	76.49	75.7	1	2	+	-	-	+	+	-	FBgn0264857
chr3R	4012054	4012254	201	*	10.0643	10.863	8.12346	0.912147	0.000148018	0.0283792	221.41	2094.23	3271.76	256.39	210.88	369.35	2	0	-	+	+	-	-	-
chr3R	16403743	16403943	201	*	6.7854	5.74946	7.38215	-0.952175	0.000150688	0.0283792	74.65	46.56	40.18	161.38	199.5	139.58	3	3	+	+	+	+	+	+	ss
chr3R	21496765	21496965	201	*	5.41248	4.2311	6.05317	-0.964185	0.000150824	0.0283792	31.63	16.93	7.78	73.9	77.53	47.78	0	2	-	-	-	-	+	+
chr3L	20281390	20281590	201	*	5.71041	4.67056	6.30842	-0.950288	0.000154939	0.028798	29.1	31.75	15.56	70.88	99.24	67.64	1	2	+	-	-	+	+	-	gogo
chr3L	12609451	12609651	201	*	8.14739	6.63628	8.86912	-0.953393	0.000157427	0.0288612	197.37	75.13	25.93	440.39	587.14	375.26	1	2	-	+	-	-	+	+	caup
chr4	572042	572242	201	*	6.08378	4.87316	6.73262	-0.961767	0.000159067	0.0288612	18.98	50.79	18.15	111.61	133.35	74.08	2	3	+	+	-	+	+	+	ND-49
chr2R	19659271	19659471	201	*	6.24028	5.25521	6.82024	-0.938462	0.000168232	0.0298587	43.02	39.15	32.41	104.06	143.68	91.26	1	3	+	-	-	+	+	+	CG15125
chr2L	13666004	13666204	201	*	6.51454	5.45573	7.11859	-0.947989	0.000169277	0.0298587	51.87	48.68	31.11	150.82	171.59	94.48	3	3	+	+	+	+	+	+	CG18507
chrX	9466572	9466772	201	*	5.86349	4.58076	6.5316	-0.958362	0.000170442	0.0298587	24.04	41.27	6.48	93.51	113.71	70.33	3	3	+	+	+	+	+	+	mgl
chrX	4425080	4425280	201	*	5.78251	4.49865	6.4509	-0.955293	0.000178222	0.0308668	39.22	16.93	11.67	84.46	131.28	46.71	2	3	+	+	-	+	+	+	bi
chr2L	18936178	18936378	201	*	6.0606	5.03659	6.65347	-0.940169	0.000182463	0.0311006	43.02	24.34	31.11	108.59	120.94	72.47	2	3	+	+	-	+	+	+	ssp3
chr3L	24828423	24828788	366	*	7.06126	7.69493	5.9044	0.951483	0.000183653	0.0311006	91.09	263.5	267.03	61.84	62.02	55.83	0	2	-	-	-	+	+	-
chr3L	14153090	14153290	201	*	5.40551	4.37297	6.00116	-0.940618	0.0001859	0.0311351	24.04	26.46	11.67	52.79	60.99	78.38	1	3	+	-	-	+	+	+
chr2R	19659886	19660086	201	*	6.77275	5.80489	7.34684	-0.923164	0.000213492	0.0347787	60.73	60.32	46.67	167.41	196.4	124.55	2	3	+	+	-	+	+	+	CG11018
chr3R	16829254	16829454	201	*	5.36218	4.37309	5.94348	-0.928254	0.000213521	0.0347787	15.18	15.87	31.11	60.33	62.02	62.27	1	1	+	-	-	-	+	-	abd-A
chr3L	9473076	9473276	201	*	4.93273	3.87777	5.53555	-0.935137	0.0002145	0.0347787	21.51	14.82	7.78	40.72	50.65	47.78	2	3	+	+	-	+	+	+	CG44838
chr2L	17266813	17267013	201	*	5.96215	4.97716	6.54208	-0.923754	0.000218716	0.0350889	30.36	43.39	20.74	98.03	95.1	86.43	2	0	+	+	-	-	-	-
chr2R	20541632	20541832	201	*	5.44839	4.41072	6.0457	-0.928672	0.000232722	0.036947	29.1	24.34	10.37	51.28	74.43	72.47	1	1	+	-	-	+	-	-	CG13427
chr2L	5473982	5474182	201	*	6.45281	5.41828	7.0491	-0.924616	0.000243974	0.0383342	34.16	65.61	28.52	134.23	138.52	124.55	2	3	+	+	-	+	+	+
chr3L	24060773	24060973	201	*	5.11389	4.14187	5.6894	-0.914292	0.000249766	0.0388438	15.18	22.22	15.56	55.8	49.62	49.39	3	2	+	+	+	+	+	-
chr2R	6199782	6199982	201	*	5.95608	4.90428	6.5579	-0.924716	0.000252427	0.038861	22.77	47.62	19.44	76.92	94.07	111.66	2	1	+	+	-	-	-	+	eIF3f2
chr2L	4366752	4366952	201	*	5.39201	4.37224	5.98351	-0.919187	0.000257569	0.0392053	25.3	26.46	10.37	67.87	67.19	54.76	2	3	-	+	+	+	+	+	Traf4
chr3R	23195853	23196053	201	*	5.54553	4.4725	6.15404	-0.923918	0.000259808	0.0392053	25.3	29.63	11.67	76.92	87.86	48.85	2	3	+	+	-	+	+	+	cnc
chr2L	11071577	11071777	201	*	5.17907	4.09531	5.79091	-0.925546	0.000264181	0.0392959	26.57	16.93	7.78	37.7	67.19	61.2	1	1	+	-	-	-	-	+	CG14915
chrX	6855697	6855897	201	*	5.91729	4.68452	6.57219	-0.928854	0.000265565	0.0392959	21.51	46.56	9.07	88.98	125.08	71.4	2	3	+	+	-	+	+	+	CG14434
chr2L	3615195	3615395	201	*	5.98989	5.03712	6.55876	-0.906832	0.000275655	0.0403967	40.49	35.98	22.04	102.56	100.27	79.99	0	2	-	-	-	+	+	-	FBgn0265369
chr2R	24045326	24045526	201	*	5.65849	4.64084	6.24929	-0.913554	0.000287878	0.0413171	35.43	26.46	12.96	73.9	90.97	63.35	1	2	+	-	-	-	+	+	sei
chrX	9650406	9650606	201	*	4.85383	3.62151	5.5086	-0.923251	0.000288404	0.0413171	16.45	12.7	7.78	43.74	70.29	22.55	2	3	+	+	-	+	+	+	Ptpmeg2
chr3L	19176817	19177017	201	*	4.90101	3.69426	5.5488	-0.922686	0.000290381	0.0413171	15.18	15.87	7.78	54.29	63.06	23.08	3	3	+	+	+	+	+	+	fz2
chr3L	3072800	3073000	201	*	5.18686	4.22073	5.76035	-0.905928	0.000292779	0.0413171	18.98	20.11	16.85	48.26	69.26	45.1	3	3	+	+	+	+	+	+	PAN3
chr2R	17803345	17803545	201	*	5.7038	4.80331	6.254	-0.892876	0.000304751	0.0418493	26.57	33.86	23.33	69.38	79.59	79.99	2	3	+	+	-	+	+	+	grh
chr3R	18403158	18403358	201	*	5.72425	4.64721	6.33401	-0.915022	0.000305118	0.0418493	31.63	25.4	18.15	90.49	107.5	44.02	3	3	+	+	+	+	+	+	Wdr37
chr3L	17644395	17644595	201	*	5.6587	4.7433	6.21433	-0.895491	0.000307478	0.0418493	26.57	31.75	22.04	61.84	86.83	74.08	1	3	-	+	-	+	+	+	Pep
chrX	19546689	19546889	201	*	5.42623	4.28322	6.05587	-0.918138	0.000307533	0.0418493	29.1	13.76	15.56	63.34	100.27	35.97	2	3	+	+	-	+	+	+	CG32532
chr3R	31062412	31062612	201	*	6.03016	4.81979	6.67895	-0.91733	0.00031467	0.0424414	45.55	27.51	11.67	88.98	155.06	63.35	1	1	+	-	-	-	-	+	dco
chrX	654220	654420	201	*	5.09716	4.04578	5.69885	-0.906374	0.000341332	0.0456337	15.18	20.11	14.26	40.72	77.53	37.58	3	3	+	+	+	+	+	+	SkpA
chr3R	31527910	31528110	201	*	5.29112	4.34477	5.85775	-0.890858	0.00035865	0.047532	20.24	26.46	14.26	57.31	65.12	51.54	1	2	-	-	+	-	+	+
chr3R	18424473	18424673	201	*	5.02001	3.9272	5.63463	-0.90485	0.000363923	0.0475387	6.33	21.16	18.15	43.74	67.19	38.12	1	2	+	-	-	+	+	-	fru
chr3L	19897999	19898199	201	*	5.80193	4.85835	6.36758	-0.891456	0.000364939	0.0475387	32.89	35.98	18.15	66.36	85.8	95.56	2	3	+	+	-	+	+	+	Su(Tpl)
chr3L	10848839	10849039	201	*	5.98815	4.9888	6.5729	-0.895751	0.000378796	0.0483533	37.96	39.15	18.15	78.43	126.11	81.06	2	3	+	+	-	+	+	+	tna
chr2R	24874845	24875045	201	*	5.55049	4.57915	6.12577	-0.892447	0.000378906	0.0483533	24.04	24.34	23.33	60.33	99.24	49.93	3	3	+	+	+	+	+	+	CG16896
chr2R	5370922	5371122	201	*	5.4765	4.54561	6.03768	-0.885804	0.00038071	0.0483533	18.98	26.46	24.63	63.34	81.66	52.07	1	1	+	-	-	+	-	-
chr2R	10813359	10813559	201	*	6.22797	5.28804	6.79234	-0.88564	0.000394626	0.0493525	45.55	44.45	27.22	110.1	134.38	88.04	1	1	-	+	-	-	-	+	CG7637
chr3L	6981451	6981651	201	*	6.03462	4.95088	6.64645	-0.899186	0.000397975	0.0493525	48.08	31.75	12.96	95.02	127.15	78.38	1	2	-	+	-	-	+	+	Galphai
chr3L	14003599	14003799	201	*	5.8587	4.93173	6.41847	-0.883683	0.000398291	0.0493525	35.43	32.81	23.33	70.88	111.64	74.08	1	3	-	-	+	+	+	+	Nprl3
chr3R	18677447	18677647	201	*	5.10878	4.10054	5.69647	-0.891373	0.000405257	0.0494112	18.98	16.93	15.56	61.84	60.99	32.75	1	2	+	-	-	+	+	-	CG7706
chr2R	11475147	11475347	201	*	5.14098	4.12185	5.73226	-0.89404	0.000407119	0.0494112	26.57	12.7	12.96	45.25	72.36	41.87	2	3	+	+	-	+	+	+	inv
chr2R	19143943	19144143	201	*	5.4785	4.37956	6.095	-0.897693	0.000408491	0.0494112	11.39	38.1	12.96	55.8	82.7	66.57	2	3	+	+	-	+	+	+	ena
chr2R	7300768	7300968	201	*	5.69929	4.69378	6.28608	-0.890767	0.000413812	0.0496607	22.77	21.16	33.7	99.54	87.86	46.71	3	3	+	+	+	+	+	+	pwn
chrX	11816784	11816984	201	*	5.36143	4.39874	5.93375	-0.882795	0.000435006	0.0515812	21.51	27.51	14.26	52.79	79.59	51	2	3	+	+	-	+	+	+	CG1578
chr3L	10849839	10850039	201	*	5.81943	4.76904	6.4208	-0.890518	0.000439826	0.0515812	29.1	42.33	10.37	84.46	90.97	81.6	2	3	+	+	-	+	+	+	tna
chr3L	10847486	10847686	201	*	5.52296	4.49408	6.11743	-0.889119	0.000439968	0.0515812	32.89	24.34	10.37	69.38	86.83	52.07	2	0	+	+	-	-	-	-	tna
chr3L	11238121	11238321	201	*	5.56246	4.6382	6.12127	-0.877757	0.000443771	0.0516299	36.69	21.16	16.85	72.39	67.19	69.25	2	3	+	+	-	+	+	+	Ir68a
chr2L	7423526	7423726	201	*	5.58737	6.14472	4.66716	0.874705	0.000466179	0.0528423	61.99	98.42	51.85	22.62	29.98	23.62	2	3	+	+	-	+	+	+	FBgn0262453
chr4	44782	44982	201	*	5.25458	4.22186	5.85029	-0.884925	0.000467693	0.0528423	21.51	25.4	9.07	57.31	74.43	41.34	3	3	+	+	+	+	+	+	PlexB
chr3R	17083782	17083982	201	*	5.66917	4.77491	6.2171	-0.871942	0.00046886	0.0528423	31.63	23.28	27.22	58.82	67.19	97.17	3	3	+	+	+	+	+	+	kuk
chrX	13384788	13384988	201	*	5.48328	4.40133	6.09456	-0.887813	0.000469309	0.0528423	26.57	26.46	10.37	76.92	88.9	39.19	1	1	+	-	-	-	-	+	Rbp1-like
chr2L	10388564	10388764	201	*	6.2261	5.38013	6.75583	-0.859086	0.000471528	0.0528423	37.96	45.5	41.48	111.61	110.61	102	1	3	-	-	+	+	+	+	Cdk1
chr3R	30568428	30568628	201	*	5.43117	4.50733	5.98983	-0.871091	0.000478748	0.0532598	21.51	28.57	18.15	67.87	73.39	49.39	1	2	+	-	-	-	+	+	tmod
chr3R	7533695	7533895	201	*	6.33261	5.29642	6.92943	-0.881934	0.00049849	0.0550543	25.3	66.67	25.93	110.1	124.04	131.53	2	3	+	+	-	+	+	+	alpha-Est5
chr3L	22065999	22066199	201	*	7.14854	6.19869	7.71638	-0.872978	0.000507343	0.0556289	63.26	102.65	54.44	194.56	265.66	170.72	2	1	+	+	-	-	+	-	CG14561
chr4	664295	664495	201	*	5.57971	4.68843	6.12653	-0.863301	0.00051296	0.055843	29.1	27.51	20.74	66.36	85.8	57.44	2	3	+	+	-	+	+	+	Slip1
chrX	10802183	10802383	201	*	6.07363	5.06713	6.66075	-0.873594	0.000547056	0.0589989	31.63	50.79	18.15	99.54	125.08	78.92	1	3	+	-	-	+	+	+	Imp
chr4	646502	646702	201	*	5.47224	4.4553	6.06281	-0.873705	0.000549691	0.0589989	24.04	27.51	14.26	70.88	89.93	39.73	1	3	+	-	-	+	+	+	Ekar
chr2L	4060770	4060970	201	*	4.88999	3.96115	5.45043	-0.864677	0.000564499	0.0593571	20.24	14.82	11.67	40.72	48.58	41.87	3	3	+	+	+	+	+	+	ed
chr3L	16631700	16631900	201	*	5.88029	5.00548	6.42098	-0.854281	0.000566307	0.0593571	31.63	34.92	29.81	98.03	94.07	64.96	2	0	+	+	-	-	-	-	Abl
chr2R	24665207	24665407	201	*	5.37464	4.4379	5.93788	-0.865935	0.000568594	0.0593571	22.77	25.4	16.85	37.7	78.56	67.64	0	2	-	-	-	+	+	-	ND-19
chr2R	24062961	24063161	201	*	5.55983	4.6203	6.12406	-0.865007	0.000568907	0.0593571	35.43	25.4	12.96	67.87	78.56	62.81	2	3	+	+	-	+	+	+	RpL39
chr3R	29794346	29794546	201	*	5.55111	4.49265	6.15505	-0.873753	0.000572501	0.0593571	15.18	38.1	14.26	60.33	99.24	54.22	1	3	+	-	-	+	+	+	sro
chr3L	2456713	2456913	201	*	4.8631	3.84273	5.45479	-0.8703	0.000583358	0.059603	21.51	13.76	7.78	51.28	47.55	32.75	3	3	+	+	+	+	+	+	Svil
chr3L	15315503	15315703	201	*	5.53038	4.34874	6.17114	-0.873425	0.000585599	0.059603	39.22	6.35	15.56	75.41	94.07	46.71	3	3	+	+	+	+	+	+
chr4	359371	359571	201	*	5.46968	4.45536	6.05938	-0.869716	0.000586605	0.059603	8.86	34.92	22.04	61.84	76.49	61.74	2	3	+	+	-	+	+	+	Hcf
chr2R	9692626	9692826	201	*	6.50017	5.36706	7.12691	-0.873052	0.000595221	0.0600779	70.85	29.63	23.33	156.85	181.93	80.53	3	3	+	+	+	+	+	+	Uba1
chr3L	18016629	18016829	201	*	5.67993	4.58154	6.29625	-0.871578	0.000603233	0.060486	27.83	34.92	9.07	96.52	92	47.24	2	3	+	+	-	+	+	+	Eip75B
chr2R	6373257	6373457	201	*	4.85204	3.6349	5.50269	-0.870582	0.000607377	0.0605035	16.45	16.93	3.89	45.25	68.22	22.55	0	2	-	-	-	-	+	+
chr2L	22024538	22024738	201	*	7.01972	5.76006	7.6818	-0.86681	0.00061481	0.060522	103.75	38.1	20.74	232.26	266.69	117.03	3	3	+	+	+	+	+	+	tio
chr2L	10231307	10231507	201	*	5.0637	4.17531	5.60946	-0.852832	0.000620492	0.060522	22.77	15.87	15.56	52.79	48.58	45.1	1	2	+	-	-	-	+	+	ova
chr3L	16773798	16773998	201	*	6.16472	5.2587	6.71694	-0.855614	0.00062397	0.060522	46.81	31.75	36.3	95.02	140.58	79.99	2	3	+	+	-	+	+	+	Nrt
chr3L	21047234	21047434	201	*	5.303	4.22386	5.91341	-0.869	0.000625054	0.060522	29.1	12.7	14.26	63.34	85.8	31.67	3	3	+	+	+	+	+	+	siz
chr3L	21175456	21175656	201	*	5.14208	4.18123	5.71376	-0.86025	0.000627418	0.060522	12.65	27.51	14.26	48.26	64.09	45.1	2	3	+	+	-	+	+	+	chb
chr2L	6612409	6612609	201	*	5.79433	4.82621	6.36851	-0.858796	0.000654424	0.061927	29.1	39.15	16.85	84.46	105.44	57.98	1	3	+	-	-	+	+	+	CG11050
chr3L	206014	206214	201	*	4.97184	3.97459	5.55589	-0.860321	0.00065474	0.061927	16.45	19.05	11.67	57.31	53.75	30.06	2	3	+	+	-	+	+	+	Gk1
chr3R	16915655	16915855	201	*	5.8626	4.91059	6.4312	-0.857125	0.000659957	0.061927	16.45	46.56	27.22	78.43	95.1	85.36	1	2	+	-	-	+	+	-	FBgn0264857
chr2L	4055860	4056060	201	*	5.51237	4.51844	6.09531	-0.86122	0.000660632	0.061927	29.1	25.4	14.26	51.28	103.37	50.46	1	2	+	-	-	-	+	+	ed
chr3R	18558992	18559192	201	*	4.91705	3.99627	5.47461	-0.852869	0.000663619	0.061927	16.45	15.87	15.56	45.25	52.72	35.43	1	1	-	+	-	-	+	-	CG7691
chr2R	24814631	24814831	201	*	7.03898	5.78094	7.70063	-0.860482	0.000666362	0.061927	113.87	26.46	24.63	212.65	258.43	153	3	3	+	+	+	+	+	+	Dll
chr2L	8127529	8127729	201	*	5.28177	4.24658	5.87828	-0.863007	0.000673095	0.0621736	31.63	8.47	16.85	51.28	80.63	44.56	2	3	+	+	-	+	+	+	CG12375
chr2R	4615423	4615623	201	*	5.45692	4.42214	6.05329	-0.860861	0.000684707	0.0628652	27.83	22.22	14.26	73.9	90.97	34.36	2	3	+	+	-	+	+	+
chr4	75445	75645	201	*	4.93373	4.04178	5.48081	-0.848847	0.000692134	0.0631665	16.45	14.82	18.15	36.2	53.75	44.02	1	3	-	+	-	+	+	+	pan
chr2L	5742	5942	201	*	6.38046	5.56458	6.89843	-0.831877	0.000713401	0.0639873	44.28	49.74	47.96	108.59	133.35	115.96	3	3	+	+	+	+	+	+	FBgn0031208
chr3R	16847302	16847502	201	*	6.40571	5.47011	6.96855	-0.851601	0.000713827	0.0639873	67.05	29.63	36.3	123.67	145.75	106.3	3	3	+	+	+	+	+	+	FBgn0020546
chr3L	16830008	16830208	201	*	6.13129	6.70497	5.16461	0.854871	0.000717283	0.0639873	96.15	159.79	57.04	39.21	36.18	32.21	2	3	+	+	-	+	+	+	CG13024
chr2R	24277152	24277352	201	*	5.14004	4.18929	5.70821	-0.852865	0.000717921	0.0639873	30.36	12.7	11.67	52.79	57.89	46.17	1	3	+	-	-	+	+	+	nvy
chr3R	27931443	27931643	201	*	5.95079	4.98963	6.52257	-0.851521	0.000729066	0.0645715	30.36	45.5	19.44	93.51	116.81	65.5	3	3	+	+	+	+	+	+	mino
chr3R	16892193	16892393	201	*	6.20055	5.25336	6.76748	-0.85067	0.000732949	0.0645715	32.89	58.2	23.33	90.49	107.5	128.84	3	3	+	+	+	+	+	+	FBgn0263595
chr3R	6762248	6762448	201	*	6.5067	5.49408	7.09585	-0.853664	0.000755608	0.0661852	65.79	48.68	20.74	140.26	164.36	105.76	1	1	-	+	-	-	+	-	Ama
chr3R	2180074	2180274	201	*	5.38993	4.49761	5.93714	-0.840747	0.000782154	0.0681189	16.45	25.4	25.93	45.25	81.66	56.91	2	2	-	+	+	-	+	+	Myo81F
chr2R	10543339	10543539	201	*	5.19311	4.22266	5.76809	-0.84718	0.000789117	0.0681971	20.24	25.4	10.37	48.26	74.43	40.8	1	1	+	-	-	-	+	-	lola
chrX	6866171	6866371	201	*	6.36812	5.37324	6.95138	-0.849136	0.000792002	0.0681971	41.75	59.26	23.33	138.75	150.92	81.6	1	1	-	+	-	-	+	-	CG14434
chr3R	23263863	23264063	201	*	5.2992	4.33894	5.87067	-0.844814	0.00080195	0.0686659	15.18	33.86	11.67	60.33	60.99	54.22	2	3	+	+	-	+	+	+	orb
chr2R	13992399	13992599	201	*	6.37451	5.31845	6.97769	-0.850302	0.000811981	0.0691126	43.02	62.44	14.26	111.61	146.79	119.72	3	3	+	+	+	+	+	+	mam
chr2R	17027075	17027275	201	*	5.70856	4.56402	6.33865	-0.849776	0.000816684	0.0691126	40.49	20.11	10.37	64.85	132.31	45.63	1	1	-	-	+	-	-	+	RhoGEF2
chr2L	12863127	12863327	201	*	5.49397	6.04377	4.59457	0.839229	0.000824114	0.0691126	92.36	66.67	38.89	24.13	26.88	21.47	1	3	-	+	-	+	+	+
chr2L	4071427	4071627	201	*	4.87229	3.9076	5.44529	-0.84471	0.000826344	0.0691126	22.77	10.58	11.67	45.25	52.72	32.75	2	2	+	+	-	-	+	+	ed
chr3R	8840526	8840726	201	*	5.73255	4.89899	6.25747	-0.827912	0.000829841	0.0691126	32.89	30.69	25.93	60.33	95.1	74.08	1	1	+	-	-	-	-	+	pyd
chr2L	519111	519311	201	*	5.56063	4.59705	6.13324	-0.842482	0.000836066	0.0692527	25.3	31.75	15.56	85.97	81.66	42.95	3	3	+	+	+	+	+	+	ush
chrX	11199013	11199213	201	*	4.9696	5.57618	3.90272	0.846947	0.000847477	0.0698183	20.24	64.55	58.33	12.07	12.4	20.4	0	3	-	-	-	+	+	+
chr3R	30569330	30569530	201	*	5.12509	4.203	5.68312	-0.836077	0.000855567	0.0701059	17.71	23.28	14.26	63.34	53.75	37.04	1	2	+	-	-	+	-	+	tmod
chr3R	6857704	6857904	201	*	6.22783	5.38075	6.758	-0.825802	0.000886831	0.0722791	30.36	51.85	42.78	95.02	127.15	102.54	2	3	+	+	-	+	+	+
chr2L	15017284	15017484	201	*	5.53064	4.63705	6.07831	-0.831029	0.00090399	0.0732427	24.04	28.57	22.04	60.33	94.07	48.32	1	1	-	+	-	-	-	+	GABA-B-R1
chr3R	12128141	12128341	201	*	6.9439	6.12473	7.46317	-0.819055	0.000908703	0.0732427	72.12	81.48	55.74	182.49	192.27	154.61	1	1	-	+	-	-	-	+	CG4702
chr2L	7048897	7049097	201	*	5.77085	4.91533	6.30425	-0.823986	0.000913071	0.0732427	29.1	38.1	23.33	87.47	87.86	61.74	2	3	+	+	-	+	+	+	milt
chr3R	5669824	5670024	201	*	6.16424	5.33191	6.68868	-0.82075	0.000925228	0.0738293	46.81	45.5	28.52	96.52	115.77	97.17	3	3	+	+	+	+	+	+	Xe7
chr3R	13381724	13381924	201	*	5.10506	4.20564	5.65487	-0.829339	0.000934275	0.0741629	18.98	16.93	19.44	55.8	60.99	34.36	1	3	+	-	-	+	+	+	CG9813
chr3L	5771243	5771443	201	*	5.3303	4.37297	5.90076	-0.83418	0.000949609	0.0748866	24.04	26.46	11.67	57.31	81.66	40.26	2	2	+	+	-	-	+	+	Ppat-Dpck
chr2R	24891917	24892117	201	*	5.23223	4.2595	5.80799	-0.835302	0.000953219	0.0748866	29.1	17.99	10.37	63.34	68.22	36.51	2	3	+	+	-	+	+	+	Ance-5
chr2R	10809313	10809513	201	*	5.56942	4.71904	6.10085	-0.820729	0.000958758	0.0749355	24.04	26.46	28.52	76.92	79.59	49.39	2	1	-	+	+	-	-	+	wde
chr4	1030845	1031045	201	*	6.15726	5.21933	6.72092	-0.83174	0.00096567	0.0750907	31.63	52.91	27.22	107.08	138.52	70.86	1	2	+	-	-	-	+	+	ATPsynbeta
chr3L	16829072	16829272	201	*	5.09669	5.64351	4.20541	0.821374	0.00097464	0.0754035	45.55	48.68	55.74	13.57	16.54	25.23	1	1	-	+	-	-	+	-	CG13024
chr2R	15892134	15892334	201	*	5.78165	4.86314	6.33839	-0.829894	0.000980169	0.0754483	40.49	33.86	12.96	72.39	78.56	91.8	1	3	-	+	-	+	+	+	sli
chr3R	10161271	10161471	201	*	4.95881	3.96306	5.54235	-0.832756	0.0010028	0.0766927	17.71	14.82	14.26	60.33	54.79	24.69	2	3	+	+	-	+	+	+	CG6254
chr3R	22727516	22727716	201	*	6.01485	5.11548	6.56465	-0.825805	0.0010064	0.0766927	41.75	40.21	22.04	76.92	129.21	77.84	2	2	+	+	-	+	+	-	Irp-1A
chr3L	8458843	8459043	201	*	5.89994	4.90718	6.48249	-0.832608	0.00101983	0.076768	45.55	32.81	11.67	64.85	112.67	90.73	0	3	-	-	-	+	+	+	Gug
chr3L	17378985	17379185	201	*	5.16806	4.2678	5.71818	-0.824854	0.00102897	0.076768	25.3	16.93	15.56	43.74	73.39	40.8	3	3	+	+	+	+	+	+	Cad74A
chrX	3704215	3704415	201	*	5.39781	4.37866	5.9891	-0.832611	0.00103066	0.076768	29.1	19.05	14.26	52.79	102.34	35.43	1	1	-	+	-	-	+	-
chr3R	29073215	29073415	201	*	6.18153	5.2623	6.73853	-0.826362	0.00103121	0.076768	48.08	47.62	19.44	93.51	131.28	95.56	1	3	-	+	-	+	+	+	CG11873
chr2L	4030333	4030533	201	*	6.58708	5.66309	7.14579	-0.827228	0.00103489	0.076768	78.44	35.98	37.59	119.15	174.7	130.99	2	3	+	+	-	+	+	+	ed
chr3R	16878580	16878780	201	*	6.45792	5.57019	7.00343	-0.822213	0.00104469	0.076768	59.46	57.14	25.93	120.66	135.41	128.84	1	3	+	-	-	+	+	+	FBgn0264857
chr3R	31739125	31739325	201	*	5.71012	4.83129	6.25232	-0.820173	0.0010525	0.076768	26.57	38.1	20.74	60.33	102.34	66.03	1	2	-	-	+	-	+	+	eEF1alpha2
chr4	959852	960052	201	*	5.77146	4.9543	6.28994	-0.810009	0.00105409	0.076768	24.04	39.15	29.81	73.9	88.9	71.94	2	2	+	+	-	+	+	-	4E-T
chr2L	18616109	18616309	201	*	6.12356	5.16886	6.6931	-0.827362	0.00105693	0.076768	40.49	40.21	27.22	117.64	137.48	55.3	1	1	-	+	-	-	+	-	IFT46
chr4	942066	942266	201	*	5.61686	4.76433	6.14911	-0.816789	0.00105776	0.076768	36.69	25.4	19.44	63.34	88.9	60.66	1	2	+	-	-	+	-	+	mGluR
chrX	8057134	8057334	201	*	5.33464	4.29696	5.93194	-0.829827	0.00107098	0.077359	13.92	35.98	9.07	69.38	70.29	43.48	2	2	+	+	-	+	+	-	fs(1)h
chr3R	6859026	6859226	201	*	6.30471	5.38388	6.86228	-0.823126	0.00107775	0.0774811	43.02	55.03	27.22	132.72	139.55	76.77	1	3	+	-	-	+	+	+	FBgn0267560
chr2R	13569402	13569602	201	*	5.89774	4.96939	6.45801	-0.822944	0.00110917	0.0793652	53.14	20.11	20.74	98.03	87.86	77.84	3	3	+	+	+	+	+	+
chr3L	54073	54273	201	*	4.95188	4.10633	5.48146	-0.811475	0.001126	0.0798595	20.24	15.87	15.56	46.75	47.55	39.73	0	2	-	-	-	-	+	+	CG43149
chr2L	16276899	16277099	201	*	5.22292	4.35441	5.76124	-0.815275	0.00113051	0.0798595	24.04	12.7	24.63	58.82	62.02	41.87	2	1	+	+	-	-	-	+	crp
chr3R	23886135	23886335	201	*	5.73287	4.88895	6.26181	-0.809869	0.00113179	0.0798595	29.1	33.86	25.93	82.95	93.03	54.22	3	3	+	+	+	+	+	+	Pli
chrX	11681852	11682052	201	*	5.67076	4.65642	6.26047	-0.824093	0.0011587	0.0813742	30.36	34.92	10.37	57.31	115.77	56.91	1	3	+	-	-	+	+	+	bif
chr3R	4640196	4640396	201	*	6.54915	5.54872	7.13425	-0.823152	0.00116858	0.0813742	27.83	81.48	31.11	111.61	164.36	145.49	1	1	-	+	-	-	-	+	CG9775
chr3R	17822203	17822403	201	*	5.19943	4.39016	5.71477	-0.802809	0.00117126	0.0813742	22.77	23.28	16.85	54.29	50.65	52.61	2	2	-	+	+	-	+	+	tinc
chr3L	22879238	22879438	201	*	5.6246	4.79001	6.14992	-0.807142	0.00117952	0.0813742	34.16	30.69	18.15	63.34	85.8	63.88	2	0	+	-	+	-	-	-	Ssl1
chr3R	6864552	6864752	201	*	5.84817	5.00811	6.37562	-0.80683	0.00118109	0.0813742	34.16	33.86	28.52	113.11	65.12	70.86	1	3	-	+	-	+	+	+	ftz
chr3R	16941865	16942065	201	*	5.12741	4.25045	5.66891	-0.811222	0.0011853	0.0813742	18.98	26.46	11.67	52.79	55.82	44.02	0	3	-	-	-	+	+	+	Abd-B
chr3R	2185195	2185395	201	*	5.15359	4.18834	5.72678	-0.819987	0.00120112	0.0820906	11.39	26.46	16.85	28.66	75.46	54.76	2	3	+	+	-	+	+	+	Myo81F
chr3R	13023684	13023884	201	*	5.04814	4.12991	5.60479	-0.81532	0.00122101	0.0826748	18.98	17.99	15.56	37.7	73.39	34.89	1	1	+	-	-	-	+	-	CtBP
chr3L	14185128	14185328	201	*	5.87278	4.98696	6.41759	-0.812404	0.0012229	0.0826748	27.83	46.56	20.74	61.84	89.93	104.68	1	1	-	+	-	-	+	-
chr4	788421	788621	201	*	5.97838	5.11308	6.51549	-0.808815	0.00122594	0.0826748	24.04	48.68	31.11	82.95	114.74	76.77	1	2	+	-	-	+	+	-	MED26
chr3L	19165132	19165332	201	*	5.58378	4.57026	6.17322	-0.819768	0.00123404	0.0828545	43.02	12.7	15.56	67.87	99.24	49.39	1	1	+	-	-	-	-	+	fz2
chr3R	26888187	26888387	201	*	5.15336	4.30768	5.68298	-0.804051	0.00125933	0.0828654	16.45	22.22	20.74	49.77	64.09	40.26	2	3	+	+	-	+	+	+	T48
chr3R	21359450	21359650	201	*	5.38299	4.57602	5.89741	-0.798704	0.0012601	0.0828654	30.36	24.34	16.85	58.82	62.02	57.98	2	2	-	+	+	-	+	+	mod(mdg4)
chr2L	19155890	19156090	201	*	5.58659	4.80095	6.09238	-0.796708	0.00126096	0.0828654	27.83	28.57	27.22	54.29	67.19	83.21	1	2	-	+	-	+	+	-	brat
chr3R	10849683	10849883	201	*	4.89109	3.89503	5.47474	-0.816845	0.00126121	0.0828654	13.92	19.05	11.67	48.26	60.99	24.16	1	3	-	-	+	+	+	+	CG4565
chr3L	14155160	14155360	201	*	5.76811	4.9747	6.27707	-0.796083	0.00126139	0.0828654	37.96	31.75	24.63	72.39	89.93	70.33	2	3	+	+	-	+	+	+
chr3L	14298166	14298366	201	*	5.41884	4.48705	5.98033	-0.811701	0.00128848	0.0840865	21.51	32.81	12.96	66.36	80.63	42.41	3	3	+	+	+	+	+	+	fz
chr3R	24530538	24530738	201	*	5.2837	4.41306	5.82282	-0.806396	0.00129101	0.0840865	15.18	25.4	23.33	48.26	77.53	44.02	3	3	+	+	+	+	+	+	CG13623
chr3L	15826066	15826266	201	*	5.18279	4.28053	5.73364	-0.807712	0.00134414	0.0871746	22.77	26.46	9.07	39.21	65.12	55.3	0	3	-	-	-	+	+	+	DCP2
chr2R	24047261	24047461	201	*	5.55478	4.76653	6.06164	-0.790594	0.0013658	0.0875286	31.63	25.4	24.63	63.34	79.59	57.44	1	1	+	-	-	-	-	+	sei
chr2L	518415	518615	201	*	6.43165	5.58802	6.96048	-0.800063	0.00136607	0.0875286	59.46	55.03	29.81	107.08	145.75	120.79	1	1	+	-	-	-	-	+	ush
chr3L	14600692	14600892	201	*	5.44524	4.50436	6.00994	-0.809703	0.00136683	0.0875286	37.96	15.87	14.26	60.33	86.83	46.17	2	3	+	+	-	+	+	+	HGTX
chr3R	8116484	8116684	201	*	5.00951	4.17978	5.53294	-0.798501	0.00137544	0.0875402	20.24	21.16	12.96	37.7	48.58	52.61	0	2	-	-	-	-	+	+	puc
chr2R	18306008	18306208	201	*	5.48908	4.62888	6.02426	-0.801646	0.0013785	0.0875402	16.45	37.04	20.74	52.79	64.09	78.38	3	3	+	+	+	+	+	+	CG14505
chr2L	7532555	7532755	201	*	5.43098	4.48821	5.99634	-0.809055	0.00138704	0.0877175	35.43	13.76	18.15	51.28	94.07	46.17	0	3	-	-	-	+	+	+	RapGAP1
chrX	12615824	12616024	201	*	4.84324	3.94185	5.39377	-0.80476	0.00140594	0.0885453	16.45	17.99	11.67	30.16	58.92	37.04	1	1	+	-	-	-	+	-	CG11085
chr3L	22074344	22074544	201	*	5.88748	5.02043	6.42526	-0.800236	0.00141512	0.0887566	39.22	29.63	28.52	92	112.67	53.15	3	3	+	+	+	+	+	+	RpLP0
chr3L	20694209	20694409	201	*	5.37905	4.56218	5.89741	-0.792284	0.0014356	0.0896723	29.1	27.51	14.26	58.82	62.02	57.98	0	3	-	-	-	+	+	+	kni
chr3L	5770199	5770399	201	*	6.19562	5.29762	6.74492	-0.802117	0.00144649	0.0899835	41.75	52.91	23.33	96.52	144.72	80.53	1	1	+	-	-	-	+	-	Ppat-Dpck
chr3R	8108873	8109073	201	*	5.30901	4.45462	5.84197	-0.795838	0.00145337	0.0900438	25.3	27.51	12.96	70.88	48.58	52.61	2	3	+	+	-	+	+	+	puc
chrX	5593965	5594165	201	*	6.69384	5.67374	7.28544	-0.806312	0.00148033	0.0913429	53.14	74.08	25.93	147.8	229.48	90.73	1	2	-	+	-	-	+	+	Vsx1
chr3R	14316135	14316335	201	*	6.22672	5.36378	6.76294	-0.796092	0.00150073	0.0922282	46.81	50.79	25.93	102.56	140.58	82.67	1	3	-	+	-	+	+	+	PR-Set7
chr2R	14504093	14504293	201	*	5.13103	4.23507	5.67958	-0.799488	0.00151213	0.0923356	25.3	16.93	14.26	40.72	75.46	37.58	1	1	+	-	-	-	-	+	Cpsf160
chr2R	16110950	16111150	201	*	5.40141	4.36398	5.99864	-0.804114	0.0015244	0.0923356	35.43	21.16	5.19	58.82	86.83	46.17	1	1	+	-	-	-	-	+	Asph
chr3L	12566311	12566511	201	*	5.32786	4.5217	5.84196	-0.787141	0.00152852	0.0923356	22.77	25.4	20.74	48.26	74.43	49.39	2	3	+	+	-	+	+	+	sowah
chr3R	30762275	30762475	201	*	5.90401	5.01981	6.44821	-0.797863	0.00153143	0.0923356	50.61	28.57	18.15	72.39	109.57	79.99	1	1	-	+	-	-	+	-
chr2L	20255075	20255275	201	*	4.86825	5.41099	3.98798	0.797964	0.00154996	0.0923356	22.77	58.2	46.67	18.1	14.47	15.03	0	3	-	-	-	+	+	+	FBgn0250817
chr3L	20711544	20711744	201	*	5.83477	5.0528	6.33906	-0.781308	0.00155469	0.0923356	35.43	31.75	32.41	84.46	96.13	62.27	2	3	+	+	-	+	+	+	CG34260
chr2R	19266193	19266393	201	*	4.83432	3.93266	5.38495	-0.798011	0.00156065	0.0923356	24.04	12.7	9.07	37.7	51.69	35.97	3	3	+	+	+	+	+	+
chr2L	3078786	3078986	201	*	5.16801	4.32944	5.69488	-0.788791	0.00156531	0.0923356	22.77	23.28	14.26	58.82	56.85	39.73	2	1	-	+	+	-	+	-	toc
chr2L	10250397	10250597	201	*	4.99209	4.09035	5.54275	-0.796883	0.00157587	0.0923356	24.04	17.99	9.07	39.21	63.06	37.58	3	3	+	+	+	+	+	+	bsk
chr3L	21149241	21149441	201	*	5.30083	4.51866	5.8052	-0.781639	0.00157969	0.0923356	18.98	26.46	23.33	46.75	64.09	56.91	0	2	-	-	-	-	+	+	Ac78C
chr3L	1342076	1342276	201	*	5.06837	4.14602	5.62649	-0.798133	0.00158121	0.0923356	24.04	14.82	14.26	45.25	72.36	30.6	3	3	+	+	+	+	+	+	CG2199
chr4	1061339	1061539	201	*	5.81348	5.00273	6.3294	-0.784398	0.00158276	0.0923356	24.04	42.33	29.81	90.49	85.8	64.96	1	1	+	-	-	-	-	+	Zyx
chr3L	1639120	1639320	201	*	5.29751	4.37811	5.85457	-0.79824	0.00158371	0.0923356	35.43	12.7	14.26	58.82	72.36	42.41	1	2	-	+	-	-	+	+	nSyb
chr3L	18743805	18744005	201	*	6.1256	5.22483	6.67591	-0.796395	0.00158729	0.0923356	30.36	33.86	47.96	105.57	142.65	58.52	1	3	-	+	-	+	+	+	CG6885
chr2R	20560347	20560547	201	*	5.35174	4.47468	5.89328	-0.7932	0.00160353	0.0929255	26.57	23.28	16.85	52.79	85.8	39.73	2	3	+	+	-	+	+	+	Mgat1
chrX	10808601	10808801	201	*	5.35909	4.48016	5.90133	-0.790121	0.00165511	0.0948731	15.18	34.92	16.85	63.34	69.26	46.71	2	3	+	+	-	+	+	+	Imp
chr3L	9455527	9455727	201	*	5.67997	4.91875	6.17567	-0.773601	0.00165617	0.0948731	35.43	30.69	24.63	75.41	76.49	64.96	3	3	+	+	+	+	+	+	phol
chr2R	18538023	18538223	201	*	5.22915	4.36893	5.76434	-0.792261	0.00165931	0.0948731	27.83	9.52	24.63	43.74	51.69	67.64	1	2	+	-	-	+	-	+	Pepck1
chr2R	9540158	9540358	201	*	5.54442	4.66272	6.08769	-0.790745	0.00166204	0.0948731	26.57	33.86	15.56	66.36	90.97	46.71	0	2	-	-	-	+	-	+	brp
chr3R	18078518	18078718	201	*	6.01046	5.20371	6.52479	-0.782608	0.00167909	0.095489	49.34	27.51	33.7	79.93	115.77	80.53	3	3	+	+	+	+	+	+	CG14317
chr3L	319203	319403	201	*	6.25664	5.37465	6.80002	-0.790614	0.00168581	0.0955146	51.87	51.85	20.74	107.08	135.41	91.8	2	3	+	+	-	+	+	+	fwd
chr3R	5021578	5021778	201	*	6.23001	5.16365	6.83644	-0.79518	0.00169791	0.0957635	67.05	27.51	12.96	129.7	138.52	74.62	2	3	+	+	-	+	+	+
chr3R	22639012	22639212	201	*	5.07133	4.13614	5.63403	-0.793798	0.00170277	0.0957635	29.1	15.87	7.78	45.25	66.16	37.58	1	2	-	+	-	-	+	+	loco
chr2R	18553854	18554054	201	*	4.93443	3.89804	5.53132	-0.793978	0.00174179	0.0972551	10.12	19.05	15.56	54.29	65.12	19.33	3	3	+	+	+	+	+	+
chr3R	8700962	8701162	201	*	5.84077	5.05632	6.34607	-0.775331	0.00175306	0.0972551	34.16	42.33	23.33	69.38	92	82.67	1	1	+	-	-	-	-	+
chr4	167766	167966	201	*	5.02433	4.10669	5.58076	-0.789873	0.00175424	0.0972551	24.04	21.16	6.48	52.79	53.75	37.04	1	1	+	-	-	-	+	-	CG33978
chr2R	20831846	20832046	201	*	5.9512	5.04762	6.50254	-0.789634	0.00175482	0.0972551	39.22	44.45	15.56	75.41	121.98	74.62	2	2	+	+	-	+	-	+	insc
chr3R	4833739	4833939	201	*	5.51778	4.62762	6.06419	-0.787798	0.00176979	0.0977298	34.16	29.63	10.37	64.85	81.66	54.22	1	2	-	+	-	-	+	+	CG14659
chr3R	16886591	16886791	201	*	6.10283	5.25074	6.63492	-0.784651	0.00178068	0.0979759	53.14	33.86	27.22	76.92	137.48	83.75	2	3	+	+	-	+	+	+	FBgn0264857
chr3R	15654006	15654206	201	*	6.20532	5.33946	6.74264	-0.785552	0.00179056	0.0981424	54.4	47.62	19.44	96.52	102.34	122.4	3	3	+	+	+	+	+	+
chrX	636548	636748	201	*	5.27711	4.45076	5.79922	-0.778868	0.00179658	0.0981424	22.77	28.57	14.26	55.8	66.16	45.1	3	3	+	+	+	+	+	+	su(sable)
chr2R	13621313	13621513	201	*	6.41425	5.45586	6.98507	-0.790108	0.00181794	0.0989545	77.18	28.57	25.93	137.25	148.85	93.95	3	3	+	+	+	+	+	+	CG17716
chr3L	4017384	4017584	201	*	5.02191	4.18245	5.54913	-0.779939	0.00184532	0.0997611	21.51	14.82	18.15	48.26	58.92	33.28	0	3	-	-	-	+	+	+	FoxL1
chr3L	4548932	4549132	201	*	4.89059	4.00404	5.43566	-0.784544	0.0018584	0.0997611	25.3	13.76	9.07	42.23	52.72	34.89	3	3	+	+	+	+	+	+	CG11357
chr3R	24229813	24230013	201	*	5.75279	5.0112	6.2402	-0.762674	0.0018717	0.0997611	35.43	32.81	28.52	75.41	83.73	67.64	0	2	-	-	-	-	+	+	Acp95EF
chr3R	9258869	9259069	201	*	5.88915	5.01401	6.42998	-0.782175	0.00188627	0.0997611	41.75	37.04	18.15	87.47	112.67	58.52	1	1	-	+	-	-	+	-	CG16736
chr2R	17870589	17870789	201	*	6.07401	5.29125	6.57863	-0.770711	0.00189037	0.0997611	39.22	49.74	28.52	78.43	110.61	97.71	2	3	-	+	+	+	+	+	Mapmodulin
chr3L	3071280	3071480	201	*	5.11231	4.24462	5.65033	-0.780081	0.0019033	0.0997611	24.04	21.16	11.67	54.29	62.02	34.36	3	3	+	+	+	+	+	+	PAN3
chr3R	21022991	21023191	201	*	4.82708	3.8343	5.40963	-0.786968	0.00190634	0.0997611	17.71	9.52	15.56	49.77	57.89	19.86	1	1	-	+	-	-	-	+	CG17278
chr2L	1402345	1402545	201	*	5.16134	4.40574	5.65468	-0.766353	0.001913	0.0997611	24.04	20.11	19.44	46.75	49.62	54.76	1	2	+	-	-	+	+	-	robo2
chrX	18930996	18931196	201	*	5.64641	4.54123	6.26479	-0.784374	0.00191629	0.0997611	26.57	38.1	5.19	70.88	115.77	44.02	3	3	+	+	+	+	+	+	CG43759
chrX	17508465	17508665	201	*	5.46406	4.4698	6.04711	-0.786518	0.00191864	0.0997611	30.36	29.63	6.48	51.28	97.17	49.93	1	3	-	-	+	+	+	+	CG43658
chrX	11600765	11600965	201	*	5.08226	4.203	5.62462	-0.780215	0.00192002	0.0997611	17.71	23.28	14.26	52.79	64.09	31.14	1	1	-	+	-	-	+	-	rho-4
chr3R	16468677	16468877	201	*	6.13392	5.26625	6.67193	-0.780487	0.00192253	0.0997611	34.16	59.26	22.04	82.95	120.94	102	2	3	+	+	-	+	+	+	CSN5
chr4	1181594	1181794	201	*	5.57461	4.74484	6.09805	-0.774755	0.00192491	0.0997611	17.71	38.1	24.63	78.43	73.39	53.68	2	3	+	+	-	+	+	+	pho
chr3L	18748249	18748449	201	*	5.3764	4.58315	5.88529	-0.769461	0.00192976	0.0997611	20.24	29.63	22.04	60.33	70.29	46.71	1	1	+	-	-	-	+	-	Nufip
chr3R	29083960	29084160	201	*	5.0108	4.20645	5.52416	-0.775497	0.00193095	0.0997611	17.71	16.93	20.74	30.16	55.82	52.07	1	1	+	-	-	-	-	+	CG11873
chr3R	17775445	17775645	201	*	5.86507	5.09604	6.36402	-0.766477	0.001944	0.099951	31.63	35.98	35	70.88	107.5	68.72	0	3	-	-	-	+	+	+	CG43102
chr3R	27426098	27426298	201	*	5.35237	5.9245	4.39021	0.784969	0.00194774	0.099951	46.81	106.88	28.52	19.61	18.61	24.69	0	2	-	-	-	+	-	+	side
chrX	2790257	2790457	201	*	8.0375	7.15462	8.58121	-0.78062	0.00196482	0.100299	192.31	141.8	93.33	416.26	486.87	245.88	1	1	-	+	-	-	-	+	kirre
chr2R	24186863	24187259	397	*	6.22376	5.45312	6.72338	-0.766149	0.00196768	0.100299	51.87	49.74	29.81	98.03	112.67	106.3	1	3	+	-	-	+	+	+	FBgn0261974
chr3R	4988965	4989165	201	*	4.95592	4.12507	5.47979	-0.773451	0.00198601	0.100831	16.45	19.05	16.85	43.74	56.85	33.28	1	2	-	+	-	+	+	-	plh
chr3L	9505700	9505900	201	*	5.47636	4.58279	6.02403	-0.779225	0.00199616	0.100831	25.3	34.92	11.67	66.36	82.7	46.17	0	2	-	-	-	+	+	-	path
chr2R	11794329	11794529	201	*	6.27692	5.45556	6.79706	-0.772415	0.00200318	0.100831	41.75	61.38	28.52	102.56	133.35	97.71	2	2	+	+	-	-	+	+	ths
chr3L	22072176	22072376	201	*	5.97193	5.126	6.50165	-0.774382	0.00201039	0.100831	29.1	49.74	25.93	102.56	106.47	62.81	3	3	+	+	+	+	+	+	CG7139
chr3R	19934941	19935141	201	*	6.78126	5.65982	7.40454	-0.778494	0.00201607	0.100831	86.03	53.97	11.67	131.21	230.52	146.56	1	3	-	+	-	+	+	+	mira
chrX	15453267	15453467	201	*	4.91634	3.86869	5.51684	-0.78205	0.00202456	0.100831	17.71	22.22	3.89	40.72	69.26	27.38	1	1	-	+	-	-	-	+	CG11655
chr3R	10623826	10624026	201	*	5.2157	4.45366	5.71175	-0.761575	0.00202574	0.100831	22.77	22.22	20.74	60.33	48.58	48.32	2	3	+	+	-	+	+	+	hth
chr3L	14638174	14638374	201	*	5.42739	4.58169	5.95701	-0.774689	0.00203629	0.100831	32.89	28.57	10.37	54.29	69.26	62.81	3	3	+	+	+	+	+	+	dlp
chr2R	13566895	13567095	201	*	6.56807	5.46513	7.18577	-0.778295	0.00204348	0.100831	91.09	23.28	18.15	144.79	181.93	110.05	2	3	+	+	-	+	+	+
chr3L	6218568	6218768	201	*	5.54008	4.43323	6.15897	-0.778521	0.00204616	0.100831	36.69	19.05	9.07	76.92	110.61	26.84	1	3	+	-	-	+	+	+	FBgn0002526
chr4	658175	658375	201	*	5.05897	4.16195	5.60791	-0.778169	0.0020509	0.100831	29.1	11.64	12.96	61.84	50.65	33.82	1	2	+	-	-	+	+	-	gw
chr3R	9877753	9877953	201	*	6.72221	5.67665	7.32205	-0.779942	0.00206632	0.101263	91.09	45.5	16.85	150.82	204.67	124.55	2	3	+	+	-	+	+	+	FBgn0266389
chr2R	20584299	20584499	201	*	5.33726	4.42643	5.89123	-0.777412	0.00207566	0.101395	18.98	33.86	11.67	61.84	76.49	39.73	2	3	+	+	-	+	+	+	qsm
chr2L	19577194	19577394	201	*	5.83406	4.93205	6.38482	-0.777316	0.00209144	0.101839	44.28	31.75	15.56	75.41	117.84	57.44	1	3	+	-	-	+	+	+	spi
chr4	501592	501792	201	*	6.58336	5.5573	7.17691	-0.7789	0.00210758	0.102025	73.38	49.74	18.15	137.25	208.81	88.04	2	1	+	+	-	-	-	+	zfh2
chr2R	13858916	13859116	201	*	5.07258	4.21932	5.60512	-0.772475	0.00211658	0.102025	26.57	13.76	15.56	52.79	59.95	33.28	2	3	+	+	-	+	+	+	CG13344
chr2R	9284734	9284934	201	*	5.54866	4.6931	6.08208	-0.772203	0.00213798	0.102025	32.89	31.75	12.96	54.29	90.97	57.98	2	3	+	+	-	+	+	+	Pkn
chr3L	1861168	1861368	201	*	5.62105	4.79347	6.14364	-0.767893	0.00213933	0.102025	30.36	35.98	16.85	79.93	80.63	51.54	1	1	+	-	-	-	+	-	Rap1
chr2R	7959690	7959890	201	*	5.90925	5.12207	6.41567	-0.763866	0.00213933	0.102025	41.75	38.1	24.63	70.88	110.61	74.62	2	1	+	+	-	-	+	-	nito
chr3R	16051342	16051542	201	*	5.95583	5.03295	6.51414	-0.77633	0.00213955	0.102025	31.63	49.74	16.85	102.56	114.74	56.91	2	3	+	+	-	+	+	+	FBgn0024222
chr4	359798	359998	201	*	6.22047	5.40113	6.73981	-0.76784	0.0021481	0.102025	29.1	61.38	36.3	90.49	129.21	100.93	2	0	+	-	+	-	-	-	Hcf
chr2L	1669717	1669917	201	*	5.46256	4.62475	5.98914	-0.770078	0.00215498	0.102025	16.45	26.46	31.11	51.28	90.97	48.32	1	1	+	-	-	-	-	+	chinmo
chr3L	21025666	21025866	201	*	6.2532	5.13359	6.87593	-0.772787	0.00216046	0.102025	65.79	31.75	7.78	111.61	160.22	80.53	1	1	+	-	-	-	+	-	skd
chr4	460201	460401	201	*	5.07743	4.30693	5.57699	-0.760458	0.00216741	0.102025	17.71	22.22	19.44	40.72	56.85	45.63	3	3	+	+	+	+	+	+	bip2
chr3L	13860101	13860301	201	*	5.24478	4.21236	5.84039	-0.776462	0.00217477	0.102025	27.83	14.82	12.96	72.39	78.56	20.94	2	3	+	+	-	+	+	+	CG8745
chr4	660170	660370	201	*	6.07124	5.28692	6.5765	-0.76201	0.00217559	0.102025	34.16	51.85	31.11	79.93	118.88	87.51	1	2	-	+	-	-	+	+	gw
chr2L	19043887	19044087	201	*	5.23754	4.46187	5.73925	-0.757638	0.00222241	0.103901	21.51	26.46	18.15	57.31	58.92	44.02	3	3	+	+	+	+	+	+	Ttc19
chr2L	22146331	22146531	201	*	5.99958	5.12795	6.53908	-0.770419	0.00223865	0.10434	48.08	41.27	15.56	87.47	114.74	76.77	2	3	+	+	-	+	+	+	CG42748
chr3L	16131944	16132144	201	*	5.18796	4.36278	5.70961	-0.765429	0.00225479	0.104772	27.83	22.22	11.67	45.25	67.19	44.56	2	3	+	+	-	+	+	+	elg1
chr3R	6009640	6009840	201	*	5.90319	5.09561	6.41785	-0.762464	0.0022663	0.104987	32.89	35.98	33.7	85.97	115.77	54.76	1	1	-	-	+	-	-	+	Rm62
chr3L	12434499	12434699	201	*	5.73302	4.73981	6.31572	-0.772481	0.00229729	0.1061	50.61	12.7	16.85	95.02	95.1	48.85	0	2	-	-	-	-	+	+	toe
chr2R	23924556	23924756	201	*	4.95125	4.12164	5.47463	-0.764889	0.00230819	0.10617	21.51	19.05	11.67	33.18	59.95	40.26	1	2	+	-	-	-	+	+	CG2812
chr3R	30781908	30782108	201	*	6.53726	5.69773	7.0645	-0.765847	0.00231274	0.10617	80.97	42.33	32.41	128.2	149.89	123.47	3	3	+	+	+	+	+	+	zfh1
chr3L	14002305	14002505	201	*	5.92746	5.16875	6.4221	-0.752732	0.00235255	0.107415	35.43	46.56	25.93	76.92	98.2	82.14	2	0	+	+	-	-	-	-	Nprl3
chr3L	1536749	1536949	201	*	6.49126	5.70094	6.99896	-0.758232	0.00235836	0.107415	65.79	53.97	36.3	116.13	160.22	107.37	1	1	-	+	-	-	+	-	Iml1
chr2L	19816194	19816394	201	*	7.47622	6.73641	7.96286	-0.749532	0.00236451	0.107415	83.5	113.23	123.14	221.7	301.84	224.94	3	3	+	+	+	+	+	+	FBgn0003922
chr3L	13032409	13032609	201	*	5.28955	4.51104	5.79243	-0.7551	0.00237371	0.107415	24.04	27.51	16.85	49.77	69.26	47.24	1	1	+	-	-	-	+	-	CG17672
chr3R	25247084	25247284	201	*	5.4632	5.93834	4.74996	0.745833	0.0023751	0.107415	50.61	69.84	63.52	28.66	27.91	24.16	0	2	-	-	-	+	+	-	bam
chr2R	16007579	16007779	201	*	5.4745	4.50305	6.04982	-0.769086	0.00240114	0.107671	40.49	15.87	11.67	75.41	86.83	36.51	2	2	+	+	-	+	-	+	Ufc1
chr3L	4409914	4410114	201	*	6.05864	5.24561	6.57548	-0.759799	0.00241212	0.107671	34.16	55.03	24.63	72.39	109.57	104.15	2	3	+	+	-	+	+	+	DOR
chr3R	12382031	12382231	201	*	5.92437	5.08691	6.45081	-0.762443	0.00241676	0.107671	49.34	25.4	27.22	84.46	117.84	60.13	2	3	+	+	-	+	+	+	CG10035
chr2L	10428673	10428873	201	*	4.90616	4.12614	5.40966	-0.75649	0.00241857	0.107671	20.24	12.7	19.44	39.21	48.58	39.73	0	3	-	-	-	+	+	+	TfIIB
chr3R	13877180	13877380	201	*	6.29661	5.36392	6.85842	-0.768034	0.0024198	0.107671	72.12	30.69	20.74	122.16	140.58	85.36	1	1	+	-	-	+	-	-	E5
chr4	135969	136169	201	*	5.08556	4.23097	5.6186	-0.76175	0.00242981	0.107671	11.39	30.69	14.26	54.29	49.62	43.48	3	3	+	+	+	+	+	+	anne
chr3R	21641292	21641492	201	*	6.20495	5.32628	6.74709	-0.765542	0.00243153	0.107671	67.05	33.86	19.44	95.02	120.94	106.3	1	3	-	+	-	+	+	+	E2f1
chr3R	21376366	21376566	201	*	6.65543	5.72683	7.21579	-0.767289	0.00243978	0.107671	74.65	63.49	20.74	125.18	187.1	133.67	3	3	+	+	+	+	+	+	mod(mdg4)
chr3L	19907453	19907653	201	*	5.61087	4.8456	6.10825	-0.751113	0.00244434	0.107671	25.3	40.21	20.74	64.85	73.39	68.72	1	3	-	+	-	+	+	+	Su(Tpl)
chr3L	11693059	11693259	201	*	7.06608	6.18499	7.60913	-0.764563	0.00245854	0.107839	75.91	104.76	37.59	170.43	255.32	159.98	1	1	+	-	-	-	-	+	Pldn
chr2R	16516128	16516328	201	*	6.37246	5.56023	6.88898	-0.758254	0.00246231	0.107839	67.05	43.39	31.11	123.67	139.55	92.34	2	3	+	+	-	+	+	+	Sema2a
chr3L	21011797	21011997	201	*	5.50945	4.72068	6.01652	-0.755485	0.00248078	0.108075	35.43	19.05	24.63	55.8	85.8	52.61	2	0	+	+	-	-	-	-	skd
chr2L	14394373	14394573	201	*	5.69533	4.89661	6.20644	-0.755763	0.00248188	0.108075	44.28	24.34	20.74	84.46	78.56	58.52	2	3	+	+	-	+	+	+	elB
chr2L	8146831	8147031	201	*	5.60131	4.76392	6.12772	-0.758918	0.0024998	0.10835	21.51	44.45	15.56	70.88	73.39	65.5	1	1	-	+	-	-	+	-	PAPLA1
chr4	443831	444031	201	*	6.21303	5.42089	6.72148	-0.75412	0.00250598	0.10835	35.43	52.91	40.18	95.02	142.65	78.92	2	3	+	+	-	+	+	+	CaMKI
chr2R	21049268	21049468	201	*	5.7695	5.0202	6.26018	-0.746324	0.00251615	0.10835	29.1	42.33	25.93	73.9	87.86	68.18	3	3	+	+	+	+	+	+
chr2R	22605612	22605812	201	*	5.05095	4.17676	5.59141	-0.760944	0.00251664	0.10835	15.18	22.22	16.85	57.31	59.95	27.38	2	3	+	+	-	+	+	+	CG4294
chr3L	9461817	9462017	201	*	6.9628	6.26115	7.43283	-0.736835	0.00253926	0.108632	80.97	80.43	68.7	176.46	168.49	173.4	1	1	+	-	-	-	-	+	CG3434
chrX	8624975	8625175	201	*	6.41316	5.32662	7.02585	-0.760614	0.00255076	0.108632	59.46	51.85	9.07	101.05	194.34	95.56	0	2	-	-	-	+	+	-
chr2L	14470148	14470348	201	*	4.88517	3.94661	5.44905	-0.763997	0.0025529	0.108632	25.3	10.58	10.37	42.23	63.06	25.77	1	2	+	-	-	+	+	-
chr3L	18361449	18361649	201	*	6.07571	5.15492	6.63327	-0.763117	0.00256133	0.108632	27.83	63.49	15.56	102.56	101.3	93.95	2	3	+	+	-	+	+	+
chr3L	14004101	14004301	201	*	6.08335	5.29306	6.59104	-0.75251	0.00256283	0.108632	49.34	30.69	37.59	113.11	110.61	65.5	1	3	+	-	-	+	+	+	Nprl3
chr3L	3035359	3035559	201	*	5.65085	4.85203	6.16199	-0.75402	0.00256594	0.108632	35.43	20.11	31.11	72.39	93.03	49.39	0	2	-	-	-	+	+	-	CG2162
chr3L	25197526	25197726	201	*	5.43364	4.59128	5.96199	-0.757544	0.00258645	0.1089	17.71	33.86	20.74	48.26	90.97	47.78	1	2	+	-	-	+	-	+
chr3R	26332409	26332609	201	*	4.88123	5.37035	4.1356	0.748344	0.00258685	0.1089	44.28	37.04	42.78	18.1	20.67	13.96	1	2	-	+	-	-	+	+	CG33970
chr3R	14569514	14569714	201	*	6.29859	5.50316	6.80836	-0.752707	0.00259371	0.1089	49.34	58.2	28.52	92	139.55	104.68	0	2	-	-	-	+	+	-	Cys
chr2L	21040919	21041119	201	*	4.90851	4.06463	5.43743	-0.759317	0.00260819	0.109207	17.71	16.93	15.56	21.11	57.89	51	1	1	+	-	-	-	-	+	CG42238
chr3R	7530642	7530842	201	*	6.21833	5.40826	6.73398	-0.753734	0.00261864	0.109344	37.96	51.85	37.59	87.47	154.02	77.84	1	3	-	+	-	+	+	+	alphaTub84D
chr3R	29675313	29675513	201	*	5.22712	4.40174	5.74883	-0.754113	0.00262973	0.109507	21.51	21.16	20.74	58.82	70.29	32.21	1	3	-	+	-	+	+	+	Bub3
chr2R	24028733	24028933	201	*	5.98244	5.19928	6.48722	-0.749199	0.00265407	0.109673	48.08	34.92	27.22	92	111.64	65.5	2	3	+	+	-	+	+	+	CG3163
chr3R	16921512	16921712	201	*	6.35579	5.53732	6.87478	-0.754104	0.00265718	0.109673	40.49	67.73	31.11	85.97	129.21	136.9	2	2	+	+	-	-	+	+	FBgn0264857
chrX	4423878	4424078	201	*	5.55078	4.61172	6.11484	-0.760766	0.00266218	0.109673	39.22	21.16	12.96	64.85	104.4	38.65	2	3	+	+	-	+	+	+	bi
chr3R	28635611	28635811	201	*	5.69404	4.82879	6.23114	-0.757572	0.00266295	0.109673	37.96	31.75	15.56	66.36	108.54	50.46	2	3	+	+	-	+	+	+	CG10011
chr2R	16785083	16785283	201	*	5.79866	4.98974	6.31386	-0.751662	0.00266969	0.109673	35.43	39.15	20.74	78.43	104.4	55.83	2	3	+	+	-	+	+	+	CG5522
chr2L	9496391	9496591	201	*	6.13259	5.41162	6.6111	-0.738556	0.00267797	0.109717	50.61	43.39	33.7	98.03	87.86	107.37	3	3	+	+	+	+	+	+	Gdi
chr2R	11615701	11615901	201	*	5.05071	4.16689	5.59477	-0.755808	0.00272132	0.110851	15.18	29.63	9.07	58.82	48.58	37.58	2	1	+	+	-	-	+	-	tou
chr2L	7305576	7305776	201	*	5.86014	5.07143	6.36719	-0.748543	0.00272697	0.110851	29.1	49.74	22.04	70.88	79.59	97.17	1	3	+	-	-	+	+	+	wg
chr2L	16485864	16486064	201	*	6.92275	6.10764	7.44042	-0.751764	0.00272745	0.110851	80.97	85.72	40.18	155.34	218.11	147.63	1	1	+	-	-	-	-	+	dac
chr3L	13040959	13041159	201	*	5.22804	4.3904	5.75456	-0.753001	0.00275323	0.111459	12.65	24.34	25.93	45.25	77.53	39.19	1	3	+	-	-	+	+	+	RpS4
chr2R	16009399	16009599	201	*	5.2586	4.53893	5.73655	-0.737615	0.00276192	0.111459	27.83	21.16	20.74	48.26	54.79	56.91	2	1	+	+	-	-	-	+	Ufc1
chrX	5880138	5880338	201	*	5.13973	4.19032	5.70743	-0.757664	0.00276436	0.111459	12.65	31.75	10.37	54.29	71.33	31.14	3	2	+	+	+	+	-	+	Usp30
chr2R	6221413	6221613	201	*	6.14778	5.2949	6.68016	-0.75411	0.00277416	0.111559	51.87	41.27	24.63	78.43	152.99	76.23	0	2	-	-	-	+	+	-	bin3
chr3L	21529210	21529410	201	*	5.09986	4.25437	5.62941	-0.751323	0.00278884	0.111569	12.65	26.46	18.15	55.8	59.95	32.75	3	3	+	+	+	+	+	+	Arv1
chr3L	8461491	8461691	201	*	5.31359	4.56408	5.80436	-0.741084	0.00279596	0.111569	25.3	27.51	18.15	45.25	69.26	53.15	1	1	+	-	-	-	-	+	Gug
chr3R	13646086	13646286	201	*	6.13689	5.38195	6.62995	-0.741773	0.00279636	0.111569	45.55	49.74	29.81	84.46	123.01	89.65	3	3	+	+	+	+	+	+	rin
chr3R	118950	119150	201	*	4.91057	4.02299	5.45602	-0.755738	0.00280536	0.111636	17.71	23.28	7.78	24.13	50.65	56.91	2	1	-	+	+	-	-	+
chr3L	7909371	7909571	201	*	6.05006	5.26864	6.55413	-0.745707	0.00281348	0.111667	46.81	45.5	23.33	75.41	115.77	90.73	3	3	+	+	+	+	+	+	pbl
chr3L	25209903	25210103	201	*	6.38596	5.56954	6.90415	-0.748621	0.00283755	0.111817	48.08	52.91	41.48	143.28	146.79	69.25	1	1	+	-	-	-	-	+
chrX	19546092	19546292	201	*	5.80112	4.76061	6.39933	-0.753813	0.00284012	0.111817	50.61	19.05	11.67	90.49	123.01	39.73	3	3	+	+	+	+	+	+	CG32532
chr2R	13563815	13564015	201	*	7.35757	6.43286	7.91653	-0.755602	0.00284015	0.111817	150.56	64.55	44.07	239.8	298.74	186.29	1	3	+	-	-	+	+	+
chr2L	6587	6787	201	*	5.26502	4.53018	5.74953	-0.736715	0.00284659	0.111817	20.24	29.63	19.44	51.28	53.75	56.37	1	3	-	+	-	+	+	+	FBgn0031208
chrX	11689677	11689877	201	*	4.82755	3.88731	5.39203	-0.754856	0.00286485	0.112245	13.92	20.11	10.37	36.2	66.16	23.62	2	3	+	+	-	+	+	+	bif
chr3L	9377333	9377533	201	*	4.97859	4.03428	5.54451	-0.754635	0.0028727	0.112264	21.51	21.16	6.48	54.29	59.95	25.77	2	3	-	+	+	+	+	+	Hsp26
chr3L	16774736	16774936	201	*	6.2488	5.42764	6.76886	-0.748915	0.00288048	0.11228	65.79	29.63	33.7	110.1	134.38	82.67	3	3	+	+	+	+	+	+	Nrt
chr3R	24348708	24348908	201	*	4.84975	3.97292	5.3912	-0.751812	0.00290604	0.112937	24.04	12.7	10.37	43.74	54.79	27.38	1	3	-	+	-	+	+	+	CG5746
chr3L	16710047	16710247	201	*	5.16561	4.39962	5.6633	-0.741663	0.00291216	0.112937	25.3	21.16	16.85	39.21	67.19	45.63	2	2	+	+	-	-	+	+	Dab
chr3R	4634520	4634720	201	*	5.31957	4.53303	5.82573	-0.743218	0.00294056	0.113701	18.98	34.92	15.56	48.26	54.79	67.11	2	1	+	-	+	-	-	+	FBgn0267233
chr3L	14031331	14031531	201	*	5.59893	4.7804	6.11795	-0.745941	0.00295568	0.113701	32.89	27.51	22.04	70.88	96.13	41.34	0	2	-	-	-	-	+	+	CG6650
chr2R	17753454	17753654	201	*	5.83444	5.01035	6.35565	-0.746292	0.00296329	0.113701	36.69	44.45	15.56	81.44	98.2	66.03	1	3	+	-	-	+	+	+	Sardh
chr3R	5670134	5670334	201	*	5.50888	4.71098	6.01965	-0.743308	0.00297252	0.113701	21.51	40.21	16.85	54.29	77.53	62.81	1	1	-	+	-	-	+	-	Xe7
chr2L	6967969	6968169	201	*	5.27595	4.47273	5.78887	-0.74299	0.00297352	0.113701	15.18	30.69	20.74	55.8	69.26	40.8	2	3	+	+	-	+	+	+	smt3
chr2L	4283409	4283609	201	*	5.23907	4.47266	5.73693	-0.739178	0.00297661	0.113701	30.36	23.28	12.96	57.31	51.69	51	0	3	-	-	-	+	+	+	tutl
chr3L	15982772	15982972	201	*	5.40097	4.66262	5.88699	-0.734865	0.00299425	0.114008	27.83	22.22	25.93	54.29	75.46	47.78	3	3	+	+	+	+	+	+	Arl1
chr4	466705	466905	201	*	5.92677	5.11164	6.44445	-0.743833	0.00302122	0.114008	37.96	47.62	18.15	98.03	96.13	67.11	3	3	+	+	+	+	+	+	bip2
chr2R	16514964	16515164	201	*	6.65737	5.69123	7.23087	-0.750716	0.00302421	0.114008	63.26	76.19	15.56	138.75	180.9	130.99	2	3	+	+	-	+	+	+	Sema2a
chr3R	17666454	17666654	201	*	6.73216	5.90155	7.25594	-0.746075	0.00303487	0.114008	87.3	51.85	40.18	134.23	206.74	117.57	2	3	+	+	-	+	+	+	CG14322
chr2R	15114471	15114671	201	*	5.6975	4.89578	6.20982	-0.742672	0.003044	0.114008	36.69	25.4	27.22	69.38	105.44	47.24	3	3	+	+	+	+	+	+	chn
chr2L	10356657	10356857	201	*	6.26996	5.45152	6.78894	-0.744043	0.00304844	0.114008	48.08	50.79	32.41	111.61	151.95	68.18	3	3	+	+	+	+	+	+	CG5367
chr2L	2992866	2993066	201	*	5.12053	4.27849	5.64876	-0.744629	0.00304892	0.114008	16.45	27.51	14.26	57.31	60.99	32.21	2	3	+	+	-	+	+	+	okr
chr3R	14570719	14570919	201	*	6.24195	5.3962	6.7716	-0.746451	0.00305369	0.114008	31.63	68.78	25.93	87.47	130.25	110.05	1	1	+	-	-	-	+	-	Cys
chrX	8905638	8905838	201	*	5.25015	4.28603	5.82296	-0.749875	0.00305959	0.114008	12.65	38.1	7.78	61.84	67.19	40.8	2	3	+	+	-	+	+	+	e(r)
chr2R	20072274	20072474	201	*	6.62962	5.83541	7.13889	-0.741061	0.00306253	0.114008	56.93	79.37	35	162.88	136.45	123.47	0	2	-	-	-	-	+	+
chr3L	5765724	5765924	201	*	5.92055	5.09524	6.44224	-0.743511	0.00307405	0.114008	32.89	47.62	22.04	98.03	106.47	56.37	2	0	-	+	+	-	-	-	CG10576
chr4	313869	314069	201	*	6.0195	5.21484	6.53299	-0.741585	0.00307849	0.114008	46.81	41.27	23.33	110.1	105.44	62.27	1	1	+	-	-	-	-	+	Zip102B
chr3L	11554791	11554991	201	*	5.45416	4.63555	5.97322	-0.743846	0.00308189	0.114008	37.96	15.87	20.74	64.85	79.59	44.02	1	3	+	-	-	+	+	+	Mob2
chr3R	19749680	19749880	201	*	5.00471	4.22977	5.50611	-0.736987	0.00309661	0.114144	24.04	17.99	14.26	55.8	41.35	39.19	3	3	+	+	+	+	+	+	GluClalpha
chr2L	19156240	19156440	201	*	7.15656	6.26113	7.70491	-0.748113	0.00310055	0.114144	103.75	95.24	31.11	168.92	259.46	197.56	1	3	+	-	-	+	+	+	brat
chr3R	21096849	21097049	201	*	6.49352	5.635	7.02807	-0.745735	0.00311977	0.114574	55.67	68.78	24.63	122.16	169.53	99.85	1	1	-	+	-	-	+	-	RhoGAP93B
chr2L	11070946	11071146	201	*	6.81727	5.97219	7.34666	-0.744198	0.0031579	0.115696	43.02	97.36	47.96	116.13	204.67	167.5	3	3	+	+	+	+	+	+	CG14915
chr2L	19702167	19702367	201	*	5.07909	4.321	5.57347	-0.736033	0.00316603	0.115716	17.71	25.4	16.85	37.7	43.42	61.74	1	1	+	-	-	-	-	+	Lar
chr3R	27681942	27682142	201	*	5.77723	4.99346	6.28226	-0.736333	0.00320127	0.116486	40.49	31.75	23.33	90.49	92	51	2	3	+	+	-	+	+	+	Sce
chr3R	27461735	27461935	201	*	5.12521	5.64254	4.31094	0.74147	0.00320407	0.116486	73.38	51.85	24.63	21.11	19.64	18.79	2	2	+	+	-	+	+	-	CG13978
chr3L	2393536	2393736	201	*	5.2928	4.39839	5.84077	-0.744732	0.00322034	0.116486	11.39	40.21	11.67	51.28	58.92	61.74	2	3	+	+	-	+	+	+	CG32298
chr2L	7033395	7033595	201	*	5.48001	4.73972	5.96686	-0.729564	0.00322807	0.116486	30.36	26.46	23.33	61.84	78.56	47.24	2	3	+	+	-	+	+	+	Rab30
chr3R	5317799	5317999	201	*	4.96279	4.10373	5.49754	-0.742473	0.00323745	0.116486	24.04	15.87	11.67	49.77	58.92	26.84	1	1	-	+	-	-	+	-	mtd
chr2R	14504366	14504566	201	*	4.83098	3.87626	5.40053	-0.745249	0.0032402	0.116486	12.65	27.51	3.89	43.74	47.55	35.43	1	3	+	-	-	+	+	+	Cpsf160
chr2R	4471530	4471730	201	*	6.10869	5.27553	6.63346	-0.740795	0.00324059	0.116486	32.89	56.09	27.22	99.54	133.35	64.96	1	1	-	+	-	-	+	-	Gprk1
chr2L	16309951	16310151	201	*	5.14826	4.31094	5.67465	-0.741224	0.0032558	0.116757	30.36	20.11	9.07	45.25	67.19	40.8	2	3	+	+	-	+	+	+	cni
chrX	11198657	11198857	201	*	5.14777	5.67559	4.30676	0.73995	0.00326458	0.116797	27.83	52.91	72.59	18.1	15.51	25.77	2	3	+	+	-	+	+	+
chrX	19495950	19496150	201	*	5.32141	4.43904	5.86493	-0.742652	0.00329088	0.117462	30.36	24.34	10.37	58.82	81.66	34.36	3	3	+	+	+	+	+	+	Pfrx
chr3R	19464286	19464486	201	*	5.05328	4.25802	5.56299	-0.733974	0.00330131	0.117559	16.45	25.4	15.56	57.31	49.62	34.89	1	3	+	-	-	+	+	+	Scsalpha2
chr2L	6375870	6376070	201	*	6.55689	5.83506	7.03578	-0.726281	0.00331685	0.117837	60.73	56.09	54.44	96.52	160.22	136.9	2	2	+	+	-	+	+	-	slam
chr2L	3078417	3078617	201	*	4.88072	4.06352	5.3992	-0.736187	0.00333517	0.118212	13.92	23.28	12.96	54.29	32.04	40.26	1	2	+	-	-	-	+	+	toc
chr3R	20714372	20714572	201	*	5.67142	4.85185	6.19085	-0.737813	0.00336685	0.119038	45.55	19.05	22.04	69.38	97.17	52.61	1	1	-	+	-	-	-	+	Oamb
chr3L	18627899	18628099	201	*	5.86235	4.95349	6.4156	-0.741722	0.00337418	0.119038	45.55	37.04	10.37	87.47	109.57	59.05	2	3	+	+	-	+	+	+	MYPT-75D
chr3R	121988	122188	201	*	5.2863	4.53786	5.77662	-0.7315	0.00338421	0.119038	20.24	22.22	27.22	43.74	43.42	77.31	1	1	-	+	-	-	-	+
chr2L	10255841	10256041	201	*	5.77024	5.05901	6.2445	-0.721923	0.00339432	0.119038	26.57	42.33	31.11	64.85	84.76	77.84	2	3	+	+	-	+	+	+	CG5676
chr3L	19895588	19895788	201	*	7.12947	6.22579	7.68084	-0.741238	0.0033975	0.119038	121.46	71.96	31.11	167.41	252.22	195.95	3	0	+	+	+	-	-	-	Su(Tpl)
chr3L	1592932	1593132	201	*	6.42912	5.48157	6.99617	-0.741183	0.0034057	0.119051	80.97	34.92	18.15	140.26	150.92	91.8	1	2	+	-	-	+	+	-	CG13917
chr3R	9033218	9033418	201	*	5.49493	4.71842	5.99699	-0.733047	0.00342349	0.119399	40.49	19.05	19.44	49.77	80.63	61.2	3	3	+	+	+	+	+	+	neur
chr3R	8193280	8193480	201	*	5.10724	4.29119	5.62527	-0.734888	0.00344291	0.119801	20.24	19.05	19.44	48.26	70.29	29.53	2	3	+	+	-	+	+	+
chr3R	24221588	24221788	201	*	5.8108	5.01447	6.32094	-0.73249	0.00346235	0.119801	40.49	37.04	19.44	88.98	97.17	53.68	0	3	-	-	-	+	+	+	twin
chr3L	14176529	14176729	201	*	5.90815	5.04313	6.44516	-0.738768	0.00346295	0.119801	58.2	26.46	14.26	72.39	96.13	92.87	2	3	+	+	-	+	+	+	D
chr2L	13793433	13793633	201	*	5.5219	4.72021	6.0342	-0.733294	0.00346764	0.119801	35.43	30.69	12.96	61.84	82.7	52.07	3	3	+	+	+	+	+	+	Sec71
chr3L	1795240	1795440	201	*	5.61872	4.88234	6.1039	-0.723585	0.00347432	0.119801	31.63	29.63	27.22	78.43	79.59	48.32	1	1	+	-	-	-	-	+	Cdc37
chr3L	23671599	23671799	201	*	6.07574	5.25405	6.59601	-0.734708	0.00350221	0.120221	17.71	42.33	54.44	111.61	101.3	77.31	1	1	+	-	-	-	-	+	AGO3
chr3L	11821933	11822133	201	*	5.45026	4.6054	5.97957	-0.735812	0.00350228	0.120221	32.89	23.28	16.85	76.92	78.56	33.82	3	3	+	+	+	+	+	+	CG5946
chr3R	27582739	27582939	201	*	4.92115	4.14686	5.42228	-0.728834	0.00353336	0.120709	22.77	14.82	15.56	45.25	50.65	32.75	3	3	+	+	+	+	+	+	wdb
chr3L	3060209	3060409	201	*	6.13629	5.1693	6.71007	-0.73774	0.00353888	0.120709	53.14	44.45	10.37	87.47	150.92	75.7	0	2	-	-	-	+	+	-	CG32486
chr3R	30856582	30856782	201	*	5.49696	4.74757	5.98767	-0.724085	0.00354026	0.120709	26.57	30.69	23.33	70.88	75.46	44.02	2	3	+	+	-	+	+	+
chrX	12018823	12019023	201	*	5.63516	4.75081	6.17941	-0.736942	0.00354831	0.120714	27.83	41.27	11.67	69.38	100.27	47.78	1	1	-	+	-	-	+	-	Lsm12a
chr3L	14151694	14151894	201	*	5.95222	5.08024	6.49186	-0.736207	0.00356736	0.121091	48.08	39.15	14.26	107.08	104.4	58.52	0	3	-	-	-	+	+	+
chr2L	4281383	4281583	201	*	6.15705	5.43721	6.63508	-0.721001	0.00357722	0.121156	48.08	50.79	31.11	85.97	93.03	119.18	1	3	-	+	-	+	+	+	tutl
chr2R	17680232	17680432	201	*	6.07643	5.27544	6.58846	-0.730591	0.00360889	0.121958	27.83	62.44	25.93	82.95	107.5	98.24	2	0	+	+	-	-	-	-	Sema1b
chr3R	28888919	28889119	201	*	5.61654	4.83334	6.12133	-0.728295	0.00362192	0.122047	36.69	30.69	18.15	64.85	94.07	49.93	3	3	+	+	+	+	+	+	CG33203
chrX	7073286	7073486	201	*	5.14903	5.68537	4.28579	0.735279	0.00363364	0.122047	25.3	88.89	40.18	18.1	23.78	16.64	2	3	+	+	-	+	+	+
chr2R	14001824	14002024	201	*	5.54608	4.83247	6.02138	-0.716581	0.00364147	0.122047	29.1	31.75	24.63	67.87	75.46	51.54	0	2	-	-	-	-	+	+	mam
chr2R	20583535	20583735	201	*	5.07373	4.29676	5.57596	-0.727965	0.00365712	0.122047	30.36	16.93	11.67	42.23	56.85	44.02	2	3	+	+	-	+	+	+	qsm
chr2L	4054010	4054210	201	*	5.70651	4.98661	6.18456	-0.718135	0.00365899	0.122047	34.16	40.21	20.74	70.88	77.53	69.79	3	3	+	+	+	+	+	+	ed
chr2L	5461342	5461542	201	*	7.49731	6.53041	8.07107	-0.734567	0.00367021	0.122047	169.54	74.08	33.7	259.41	324.58	222.79	1	2	+	-	-	+	+	-	mid
chr3L	16775569	16775769	201	*	5.95295	5.19222	6.44845	-0.725064	0.00367076	0.122047	50.61	37.04	22.04	81.44	106.47	74.08	1	3	+	-	-	+	+	+	Nrt
chr3L	17653185	17653385	201	*	5.49523	4.76108	5.97946	-0.722512	0.00367557	0.122047	29.1	32.81	19.44	45.25	65.12	78.92	1	3	+	-	-	+	+	+	CG7484
chr3R	8469539	8469739	201	*	5.95183	5.08384	6.48997	-0.732713	0.00371848	0.123203	36.69	50.79	14.26	105.57	102.34	61.74	1	1	+	-	-	+	-	-	CG45263
chr3L	5136229	5136429	201	*	5.26947	4.43514	5.7947	-0.73062	0.00373831	0.123208	27.83	25.4	11.67	46.75	81.66	38.12	1	1	-	+	-	-	-	+	CG4611
chr2R	12172894	12173094	201	*	6.03491	5.29236	6.52272	-0.720899	0.00374222	0.123208	50.61	42.33	24.63	90.49	107.5	77.84	1	2	+	-	-	-	+	+	CCT5
chr3R	16470046	16470246	201	*	5.28831	4.5319	5.78199	-0.721885	0.00375181	0.123208	26.57	28.57	14.26	52.79	67.19	45.1	3	3	+	+	+	+	+	+	CSN5
chr2L	8302845	8303045	201	*	5.9106	5.18029	6.39316	-0.718457	0.00375412	0.123208	44.28	35.98	28.52	85.97	103.37	62.81	3	3	+	+	+	+	+	+	Btk29A
chr2R	5652758	5652958	201	*	5.59999	4.75205	6.13048	-0.730704	0.00375906	0.123208	30.36	34.92	15.56	76.92	94.07	39.19	2	3	+	+	-	+	+	+	CG1344
chr2L	19139817	19140017	201	*	5.45313	4.66562	5.95969	-0.726634	0.00377197	0.123366	35.43	26.46	14.26	48.26	84.76	53.68	3	3	+	+	+	+	+	+	brat
chr2R	21477382	21477582	201	*	6.14355	5.27938	6.68024	-0.731562	0.00378315	0.123435	49.34	52.91	14.26	93.51	126.11	88.04	3	3	+	+	+	+	+	+	Sdc
chr2L	4821624	4821824	201	*	6.29334	5.42882	6.83016	-0.731529	0.00379027	0.123435	65.79	34.92	28.52	116.13	159.19	66.03	2	1	+	+	-	-	+	-	CG15628
chr3L	10290700	10290900	201	*	5.11879	4.3789	5.60546	-0.71779	0.00382495	0.124063	18.98	20.11	23.33	55.8	53.75	36.51	1	2	-	-	+	-	+	+	FBgn0267665
chr2R	12980248	12980448	201	*	6.24117	5.42503	6.75924	-0.727952	0.00382584	0.124063	64.52	42.33	22.04	114.62	127.15	83.21	1	3	-	+	-	+	+	+	Psc
chr3L	15223839	15224039	201	*	6.40853	5.5804	6.93134	-0.728137	0.00384973	0.124266	50.61	70.9	22.04	138.75	116.81	110.59	1	3	-	+	-	+	+	+
chr3R	8805528	8805728	201	*	5.56838	4.61665	6.13689	-0.730875	0.00385202	0.124266	43.02	25.4	5.19	55.8	93.03	62.27	0	2	-	-	-	-	+	+	CCT7
chrX	3780231	3780431	201	*	5.77765	4.84823	6.3383	-0.73116	0.00385656	0.124266	32.89	44.45	9.07	76.92	112.67	53.15	1	1	-	+	-	-	+	-	Tlk
chr3L	6742295	6742495	201	*	6.22027	5.42161	6.73136	-0.72577	0.00389125	0.125119	68.32	31.75	28.52	92	133.35	93.41	2	3	+	+	-	+	+	+	dikar
chr3R	13811858	13812058	201	*	6.13509	5.34963	6.64081	-0.723535	0.00393075	0.126123	58.2	43.39	20.74	85.97	117.84	95.56	2	3	+	+	-	+	+	+	tal-2A
chr2R	11796269	11796469	201	*	5.53525	4.78844	6.02488	-0.717924	0.00396415	0.126435	22.77	38.1	22.04	48.26	83.73	63.35	1	1	+	-	-	-	-	+	ths
chr3L	9367293	9367493	201	*	6.04757	5.26376	6.55261	-0.721749	0.003967	0.126435	37.96	53.97	23.33	95.02	116.81	69.79	3	3	+	+	+	+	+	+	Klp67A
chrX	17314260	17314460	201	*	5.73581	4.91982	6.25382	-0.724561	0.00397624	0.126435	31.63	42.33	16.85	70.88	105.44	52.61	1	1	-	+	-	-	+	-	B-H2
chrX	13091022	13091222	201	*	5.35558	4.39384	5.92756	-0.728324	0.00398133	0.126435	15.18	34.92	12.96	66.36	89.93	26.31	1	3	-	+	-	+	+	+	hep
chr2L	9698499	9698699	201	*	5.15568	4.33727	5.67465	-0.725571	0.00398193	0.126435	34.16	14.82	11.67	45.25	67.19	40.8	2	1	+	+	-	-	+	-	Pka-C1
chr3R	29215724	29215924	201	*	5.40193	4.55119	5.9335	-0.725892	0.00400788	0.126994	31.63	29.63	9.07	81.44	57.89	44.02	0	2	-	-	-	-	+	+	FBgn0051044
chr2L	19158861	19159061	201	*	6.31217	5.53959	6.81259	-0.720516	0.00401726	0.127027	67.05	46.56	25.93	107.08	129.21	100.93	2	3	+	+	-	+	+	+	brat
chr2R	6814051	6814251	201	*	6.72585	5.86659	7.26067	-0.726521	0.00403069	0.127188	46.81	98.42	29.81	129.7	175.73	154.61	3	3	+	+	+	+	+	+	koi
chr2L	11211622	11211822	201	*	4.84899	4.04487	5.36227	-0.722725	0.00404737	0.12745	16.45	20.11	12.96	30.16	59.95	33.28	1	3	+	-	-	+	+	+	ab
chr3L	303739	303939	201	*	4.90762	4.15869	5.39815	-0.714287	0.00408717	0.128438	18.98	19.05	15.56	49.77	42.38	34.36	0	2	-	-	-	-	+	+	RhoGEF3
chr3L	16229008	16229208	201	*	4.88284	4.11362	5.38188	-0.716975	0.00410129	0.128617	13.92	21.16	16.85	42.23	50.65	32.21	0	2	-	-	-	-	+	+	CG5027
chr3R	21060066	21060266	201	*	5.87595	5.05096	6.39752	-0.722208	0.00413548	0.129423	34.16	49.74	15.56	93.51	98.2	61.2	2	3	+	+	-	+	+	+	Mvl
chr3L	3452929	3453129	201	*	6.14439	5.35344	6.65235	-0.719826	0.00415142	0.129655	49.34	48.68	24.63	84.46	141.62	75.7	2	2	+	+	-	-	+	+	eIF5B
chr3L	19923322	19923522	201	*	5.30018	4.60561	5.76706	-0.704566	0.00418079	0.130197	22.77	24.34	25.93	58.82	58.92	45.63	1	2	-	+	-	-	+	+	Su(z)12
chr3R	9266827	9267027	201	*	5.78638	4.97328	6.30324	-0.720656	0.00418606	0.130197	41.75	31.75	20.74	88.98	103.37	44.56	0	3	-	-	-	+	+	+	TrpRS
chrX	636238	636438	201	*	5.07854	4.2638	5.59606	-0.719338	0.00420416	0.130197	11.39	30.69	15.56	52.79	55.82	36.51	1	1	-	+	-	-	+	-	su(sable)
chr3L	4626644	4626844	201	*	6.36324	5.61605	6.85302	-0.713663	0.00421216	0.130197	59.46	53.97	33.7	114.62	145.75	86.43	0	2	-	-	-	+	+	-	HDAC1
chrX	8714502	8714702	201	*	5.2813	4.37866	5.83229	-0.72376	0.00422023	0.130197	29.1	19.05	14.26	43.74	98.2	28.99	1	3	-	+	-	+	+	+	CG2004
chr2R	24190816	24191016	201	*	6.0464	5.28861	6.54066	-0.71538	0.00422814	0.130197	32.89	57.14	27.22	76.92	83.73	118.64	2	2	+	+	-	+	+	-	ocm
chr2R	4419717	4419917	201	*	5.824	5.06854	6.31729	-0.714127	0.00422856	0.130197	18.98	40.21	41.48	84.46	93.03	61.74	2	3	+	-	+	+	+	+	Gprk1
chr3L	25429229	25429429	201	*	6.51947	5.79621	6.99898	-0.70947	0.00424585	0.130466	39.22	61.38	66.11	147.8	132.31	103.61	3	3	+	+	+	+	+	+	lovit
chrX	18797230	18797430	201	*	5.81022	5.00865	6.32247	-0.718223	0.00426028	0.130564	31.63	45.5	19.44	79.93	106.47	53.68	1	2	-	+	-	-	+	+	bnb
chr2L	8384373	8384573	201	*	5.35239	4.6199	5.8359	-0.709261	0.00427379	0.130564	26.57	26.46	20.74	61.84	69.26	40.26	1	3	-	+	-	+	+	+	AlaRS
chr2L	10232073	10232273	201	*	5.20745	4.42931	5.71017	-0.716732	0.00427905	0.130564	34.16	20.11	10.37	57.31	44.45	55.3	2	3	+	+	-	+	+	+	ova
chr2R	14621459	14621659	201	*	5.83816	5.11253	6.3187	-0.709173	0.00428332	0.130564	41.75	29.63	32.41	85.97	98.2	55.3	0	3	-	-	-	+	+	+	CG12863
chr2R	22637661	22637861	201	*	5.77887	4.92891	6.31014	-0.720876	0.00430859	0.131072	48.08	26.46	16.85	87.47	104.4	46.17	2	0	+	+	-	-	-	-	Cdk9
chr2L	22168589	22168789	201	*	6.28179	5.56408	6.75889	-0.707386	0.0043225	0.131233	50.61	55.03	36.3	102.56	136.45	85.9	1	1	+	-	-	-	-	+	Clamp
chr3R	11888080	11888280	201	*	5.7477	4.97889	6.24657	-0.713787	0.00434853	0.131344	35.43	42.33	16.85	69.38	96.13	62.27	1	1	-	+	-	-	+	-	mthl5
chr3L	1567990	1568190	201	*	6.16782	5.39593	6.66796	-0.714447	0.00435049	0.131344	37.96	62.44	25.93	84.46	126.11	94.48	1	1	+	-	-	-	+	-	CG7879
chr3R	6007808	6008008	201	*	5.78872	5.04215	6.27824	-0.710989	0.00435198	0.131344	40.49	40.21	18.15	76.92	90.97	64.96	0	2	-	-	-	-	+	+	Rm62
chrY	1417781	1417981	201	*	4.8394	5.43059	3.82055	0.719277	0.00436611	0.13151	15.18	45.5	68.7	12.07	7.24	23.08	2	3	+	+	-	+	+	+
chr3R	31329271	31329471	201	*	5.81898	5.01066	6.33394	-0.717687	0.00438627	0.131856	16.45	46.56	33.7	70.88	58.92	112.2	3	3	+	+	+	+	+	+	CG34347
chr2L	16525994	16526194	201	*	4.95378	5.42449	4.25058	0.703497	0.00440373	0.13212	41.75	50.79	36.3	18.1	18.61	20.4	3	3	+	+	+	+	+	+	CG5953
chr2L	19164793	19164993	201	*	6.02642	5.13235	6.57427	-0.71953	0.00444258	0.133024	54.4	39.15	11.67	70.88	132.31	82.67	2	2	+	+	-	-	+	+	brat
chr3R	16951556	16951756	201	*	5.27013	4.56849	5.74015	-0.703245	0.00445979	0.133278	16.45	27.51	27.22	46.75	60.99	52.61	3	3	+	+	+	+	+	+	Abd-B
chr3L	20693760	20693960	201	*	5.62411	4.93539	6.08836	-0.702493	0.00447954	0.133606	36.69	20.11	35	60.33	71.33	72.47	2	3	-	+	+	+	+	+	kni
chr4	1230644	1230844	201	*	6.22646	5.45723	6.7255	-0.711519	0.00449779	0.133888	50.61	53.97	27.22	111.61	132.31	73.55	1	2	+	-	-	-	+	+	Dyrk3
chr3R	6845665	6845865	201	*	6.08936	5.38186	6.56198	-0.70238	0.00452817	0.134277	40.49	56.09	28.52	95.02	97.17	91.26	0	2	-	-	-	-	+	+	Scr
chrX	6849634	6849834	201	*	5.03189	4.20658	5.55359	-0.714557	0.00453448	0.134277	16.45	28.57	10.37	49.77	58.92	32.21	2	0	-	+	+	-	-	-	Cht11
chr2R	4671668	4671868	201	*	5.7289	4.82713	6.27957	-0.717751	0.00453726	0.134277	21.51	45.5	18.15	87.47	108.54	37.04	1	3	+	-	-	+	+	+	CG17883
chr3R	8335020	8335220	201	*	6.52017	5.5606	7.09141	-0.716116	0.00456213	0.1345	86.03	29.63	25.93	141.77	194.34	73.01	1	2	+	-	-	+	-	+	Poxm
chr3L	4021329	4021529	201	*	5.69701	4.93352	6.19366	-0.709464	0.00456247	0.1345	40.49	31.75	19.44	85.97	84.76	48.85	1	1	+	-	-	-	+	-	Mul1
chr2L	12616745	12616945	201	*	5.5834	4.79531	6.0902	-0.712178	0.00457399	0.134579	30.36	41.27	11.67	70.88	59.95	73.55	2	3	+	+	-	+	+	+	Ref2
chr2L	9495932	9496132	201	*	5.02946	4.22247	5.54389	-0.712088	0.00463261	0.136032	15.18	31.75	9.07	45.25	49.62	45.1	2	0	+	-	+	-	-	-	Gdi
chr3R	31738368	31738568	201	*	5.43001	4.62767	5.94258	-0.711655	0.00465019	0.136032	18.98	37.04	18.15	55.8	86.83	41.87	2	0	+	+	-	-	-	-	eEF1alpha2
chr3R	18167660	18167860	201	*	5.44107	4.6137	5.96357	-0.71397	0.00465896	0.136032	40.49	14.82	18.15	66.36	81.66	39.19	1	3	+	-	-	+	+	+	Prx5
chr3R	7549220	7549420	201	*	5.08843	4.40644	5.54964	-0.697108	0.00465906	0.136032	22.77	20.11	20.74	43.74	51.69	45.1	1	1	+	-	-	-	-	+	alpha-Est1
chr3R	10165077	10165277	201	*	5.96278	5.15027	6.47941	-0.712115	0.00469085	0.136698	27.83	59.26	19.44	82.95	109.57	75.16	1	1	-	+	-	-	-	+	Best1
chr3L	18174945	18175145	201	*	5.54229	4.79199	6.03339	-0.706608	0.00471648	0.137105	39.22	29.63	14.26	57.31	79.59	59.59	3	3	+	+	+	+	+	+	hid
chr2R	8723600	8723800	201	*	5.74932	4.91809	6.27333	-0.712855	0.00472278	0.137105	46.81	29.63	14.26	84.46	98.2	49.39	1	1	+	-	-	-	+	-	gcl
chr3L	223224	223424	201	*	5.78261	4.91809	6.31943	-0.713326	0.00477023	0.1381	46.81	29.63	14.26	72.39	118.88	48.32	2	0	+	-	+	-	-	-	pyx
chr2L	13296572	13296967	396	*	5.76762	4.92515	6.296	-0.712449	0.00477518	0.1381	48.08	27.51	15.56	96.52	93.03	46.17	2	0	+	+	-	-	-	-	CG31729
chrX	6986331	6986531	201	*	5.79131	4.79647	6.37455	-0.710292	0.00478886	0.13818	48.08	27.51	7.78	67.87	135.41	45.63	0	3	-	-	-	+	+	+	ogre
chr4	207155	207355	201	*	5.86133	5.15174	6.33487	-0.698551	0.00480015	0.13818	34.16	46.56	25.93	78.43	97.17	66.57	1	1	+	-	-	-	+	-	Crk
chrX	8894066	8894266	201	*	5.08632	4.11971	5.65998	-0.712064	0.00480857	0.13818	18.98	25.4	7.78	54.29	77.53	19.86	2	2	+	+	-	-	+	+	Moe
chr4	60051	60251	201	*	5.97391	5.24075	6.45771	-0.702452	0.00481422	0.13818	30.36	57.14	25.93	85.97	82.7	95.02	2	2	+	+	-	-	+	+	FBgn0264617
chr4	659637	659837	201	*	5.11377	4.43761	5.57233	-0.694057	0.00486797	0.13946	18.98	20.11	25.93	43.74	49.62	49.39	0	3	-	-	-	+	+	+	gw
chr3L	21144151	21144351	201	*	6.02717	5.28057	6.5167	-0.703051	0.00488015	0.139547	30.36	60.32	25.93	88.98	98.2	87.51	2	3	+	+	-	+	+	+	Ac78C
chr3L	20432539	20432739	201	*	5.225	4.47653	5.71533	-0.702171	0.00489378	0.139566	17.71	29.63	19.44	51.28	68.22	38.12	3	2	+	+	+	-	+	+	Las
chr3R	4607798	4607998	201	*	5.40816	4.61853	5.91559	-0.706018	0.00489913	0.139566	24.04	32.81	16.85	78.43	66.16	36.51	3	2	+	+	+	-	+	+
chr3L	23250407	23250607	201	*	5.2065	4.31632	5.75291	-0.711039	0.00491386	0.139724	20.24	31.75	7.78	58.82	72.36	30.6	3	3	+	+	+	+	+	+	nAChRalpha4
chrX	3677559	3677759	201	*	5.13308	4.33364	5.64448	-0.707511	0.00494114	0.139982	25.3	22.22	12.96	39.21	76.49	34.36	0	2	-	-	-	-	+	+	Mnt
chr2R	4853197	4853397	201	*	6.13262	5.26728	6.66974	-0.710388	0.0049413	0.139982	40.49	58.2	16.85	104.06	137.48	63.88	2	3	-	+	+	+	+	+
chr2L	7828265	7828465	201	*	7.34141	6.46835	7.88144	-0.71013	0.00497223	0.140125	150.56	76.19	38.89	229.24	295.64	182.53	0	2	-	-	-	-	+	+	mts
chr3L	3782785	3782985	201	*	5.91953	5.15834	6.41521	-0.703337	0.0049729	0.140125	37.96	49.74	19.44	82.95	105.44	67.64	3	3	+	+	+	+	+	+	CG32264
chr2L	14581000	14581200	201	*	4.88764	4.12421	5.38427	-0.70218	0.00498246	0.140125	17.71	19.05	15.56	48.26	48.58	28.45	2	2	+	+	-	-	+	+
chr2R	10421031	10421231	201	*	5.97975	5.26006	6.45771	-0.698562	0.00498311	0.140125	31.63	44.45	38.89	70.88	123.01	69.79	1	2	+	-	-	-	+	+	CG11825
chr4	558618	558818	201	*	5.76584	5.03317	6.24941	-0.698842	0.00503192	0.14103	41.75	37.04	19.44	84.46	85.8	57.98	2	3	+	+	-	+	+	+	Pur-alpha
chr3R	9422631	9422831	201	*	4.81896	4.01616	5.33171	-0.70647	0.00503888	0.14103	22.77	17.99	7.78	31.67	54.79	34.36	1	2	-	+	-	-	+	+	ps
chr3R	24032024	24032224	201	*	5.46948	4.69982	5.9687	-0.702948	0.00504305	0.14103	27.83	30.69	19.44	60.33	88.9	38.65	2	2	+	+	-	-	+	+	KrT95D
chr2L	224266	224466	201	*	6.63268	5.78383	7.16353	-0.708289	0.00506437	0.141163	88.56	50.79	25.93	104.06	190.2	135.82	1	2	+	-	-	+	-	+	FBgn0265153
chrY	2907796	2907996	201	*	5.07159	5.63507	4.13417	0.70826	0.005076	0.141163	45.55	17.99	85.55	15.08	13.44	24.16	1	2	-	+	-	-	+	+
chr3R	25067241	25067441	201	*	6.46306	5.58795	7.00387	-0.708388	0.00507691	0.141163	32.89	86.77	24.63	98.03	158.16	128.84	1	2	+	-	-	-	+	+	Stt3B
chr3R	16770742	16770942	201	*	5.56294	4.85586	6.03536	-0.697849	0.00508485	0.141163	30.36	25.4	31.11	55.8	47.55	93.41	1	1	+	-	-	-	+	-	FBgn0020556
chr2L	19577575	19577775	201	*	5.73554	4.96879	6.23354	-0.702435	0.00511296	0.141685	49.34	26.46	18.15	79.93	88.9	56.91	2	3	+	+	-	+	+	+	spi
chr3R	8288922	8289122	201	*	5.56269	4.74738	6.08043	-0.704743	0.00518779	0.143497	36.69	29.63	14.26	60.33	100.27	42.41	1	2	+	-	-	-	+	+	CG31464
chr3R	26056519	26056719	201	*	4.99956	4.09727	5.55042	-0.706314	0.00520571	0.143732	29.1	10.58	11.67	66.36	51.69	22.55	1	1	-	+	-	-	+	-	Dak1
chr3L	20403223	20403423	201	*	6.12332	5.43928	6.58545	-0.689446	0.00521772	0.143803	40.49	50.79	38.89	82.95	123.01	82.14	1	1	+	-	-	-	-	+	trbl
chr2L	16406780	16406980	201	*	5.01813	4.26742	5.50941	-0.697204	0.00524595	0.144238	15.18	29.63	12.96	48.26	46.52	41.87	3	0	+	+	+	-	-	-	CG5888
chrX	11198042	11198242	201	*	4.98235	5.51829	4.12014	0.705041	0.00525242	0.144238	18.98	66.67	51.85	10.56	20.67	20.94	1	3	-	+	-	+	+	+
chr2R	23586459	23586659	201	*	5.15358	4.39134	5.64971	-0.699508	0.00527114	0.144339	30.36	22.22	10.37	46.75	63.06	40.8	1	1	+	-	-	-	+	-	apt
chr2R	7961692	7961892	201	*	6.74451	5.94712	7.25508	-0.702509	0.00527503	0.144339	40.49	100.53	44.07	143.28	184	130.99	1	1	+	-	-	-	+	-	2021-09-05
chr2R	5265380	5265580	201	*	5.50898	4.84434	5.96226	-0.68532	0.00529644	0.144665	24.04	34.92	27.22	52.79	68.22	66.03	3	3	+	+	+	+	+	+	d4
chr3R	30781490	30781690	201	*	4.90671	4.18444	5.38579	-0.695725	0.00533433	0.145439	22.77	20.11	11.67	31.67	46.52	47.24	1	3	-	+	-	+	+	+	zfh1
chr4	1031701	1031901	201	*	6.84142	6.09809	7.32957	-0.69663	0.00535809	0.145826	84.77	74.08	46.67	158.36	209.84	114.35	1	2	-	+	-	-	+	+	ATPsynbeta
chr2R	16667913	16668113	201	*	5.6177	4.85977	6.11202	-0.697093	0.00538405	0.146271	24.04	42.33	20.74	60.33	95.1	52.07	1	1	+	-	-	-	-	+	Picot
chr2R	8643466	8643666	201	*	5.39337	4.68741	5.8653	-0.691151	0.00540426	0.146382	36.69	21.16	19.44	57.31	69.26	48.32	3	3	+	+	+	+	+	+
chr2R	13944153	13944353	201	*	5.65385	4.88807	6.15146	-0.697708	0.00540747	0.146382	36.69	27.51	24.63	78.43	95.1	39.73	2	3	+	+	-	+	+	+	shot
chr3L	13929348	13929548	201	*	6.12412	5.31467	6.63953	-0.700939	0.0054204	0.146382	41.75	58.2	19.44	98.03	131.28	69.79	2	3	+	+	-	+	+	+	DCTN1-p150
chr2R	22700580	22700780	201	*	6.5333	5.71537	7.05208	-0.701659	0.00542653	0.146382	78.44	57.14	22.04	117.64	160.22	120.25	1	3	-	+	-	+	+	+	robo1
chr3R	5659813	5660013	201	*	6.50358	5.74859	6.99666	-0.696543	0.00546827	0.146976	58.2	60.32	42.78	99.54	191.23	92.34	1	1	-	+	-	-	+	-	CG2182
chr4	489674	489874	201	*	5.09992	4.34948	5.59108	-0.694719	0.00547261	0.146976	16.45	31.75	12.96	43.74	56.85	44.02	1	3	-	+	-	+	+	+	Asator
chr2R	15201110	15201310	201	*	5.1465	4.32795	5.66553	-0.699808	0.00548721	0.146976	25.3	23.28	11.67	61.84	63.06	27.38	1	2	-	+	-	-	+	+	GPHR
chrX	10865687	10865887	201	*	5.26717	4.47748	5.77461	-0.698192	0.00550373	0.146976	20.24	34.92	11.67	45.25	74.43	44.56	1	1	-	+	-	-	+	-	CG2186
chr2L	19811076	19811276	201	*	5.37694	4.72224	5.82563	-0.682524	0.0055203	0.146976	26.57	25.4	27.22	43.74	63.06	63.35	1	1	+	-	-	-	-	+	FBgn0003923
chr2L	16413843	16414043	201	*	5.05178	4.22818	5.57281	-0.700021	0.00552188	0.146976	26.57	17.99	11.67	48.26	68.22	26.31	3	2	+	+	+	+	+	-	CG5888
chr2R	11469485	11469685	201	*	5.82589	5.09254	6.30976	-0.693113	0.00552675	0.146976	41.75	35.98	24.63	67.87	112.67	57.44	2	3	+	+	-	+	+	+
chr3R	10144089	10144289	201	*	5.63571	4.94087	6.10269	-0.686323	0.0055284	0.146976	35.43	35.98	20.74	75.41	75.46	55.3	1	2	-	+	-	+	+	-	TAF1B
chr3L	21728633	21728833	201	*	5.75599	5.04799	6.22883	-0.688599	0.00555565	0.146976	39.22	32.81	27.22	79.93	94.07	51	0	2	-	-	-	+	+	-	CG11247
chr2L	10398119	10398319	201	*	6.47831	5.76644	6.95285	-0.689922	0.00556101	0.146976	51.87	75.13	36.3	108.59	138.52	124.55	3	3	+	+	+	+	+	+	Cnot4
chr3R	28417999	28418199	201	*	4.89127	4.01323	5.43317	-0.700739	0.00556402	0.146976	27.83	6.35	14.26	55.8	48.58	25.23	3	3	+	+	+	+	+	+	beat-VI
chr3R	32051920	32052120	201	*	6.19772	5.45876	6.684	-0.692855	0.00556428	0.146976	34.16	66.67	31.11	101.05	119.91	87.51	2	3	+	+	-	+	+	+	mod
chr2R	14207995	14208195	201	*	7.01838	6.26447	7.511	-0.694862	0.00557605	0.147032	80.97	106.88	42.78	174.95	216.04	156.22	1	1	+	-	-	-	+	-	Sox15
chr2L	16333670	16333870	201	*	5.47277	4.62767	6.00216	-0.699687	0.00559232	0.147206	18.98	37.04	18.15	61.84	97.17	33.28	2	0	+	+	-	-	-	-	CG31817
chr2L	5327154	5327354	201	*	4.88391	4.08193	5.39632	-0.696229	0.00562512	0.147518	11.39	26.46	12.96	49.77	46.52	30.06	2	0	+	+	-	-	-	-	cype
chr4	1027032	1027232	201	*	6.68903	5.95199	7.17448	-0.6923	0.00563437	0.147518	64.52	83.6	37.59	126.69	176.76	129.92	2	3	+	+	-	+	+	+	PlexA
chr3L	18901495	18901695	201	*	5.7804	4.99099	6.28773	-0.696421	0.00563446	0.147518	41.75	38.1	15.56	95.02	88.9	50.46	1	1	-	+	-	-	+	-	arx
chr2L	18652158	18652358	201	*	5.8365	5.10587	6.3192	-0.690939	0.00564289	0.147518	35.43	49.74	18.15	75.41	86.83	77.31	2	0	-	+	+	-	-	-	Cyp310a1
chr2L	21866516	21866716	201	*	6.19484	5.34201	6.72721	-0.699194	0.00565355	0.147544	39.22	65.61	16.85	90.49	145.75	81.6	3	3	+	+	+	+	+	+	FBgn0266222
chr3L	18138334	18138534	201	*	6.30991	5.54667	6.80645	-0.694391	0.00566626	0.147623	31.63	76.19	32.41	110.1	105.44	120.25	1	1	+	-	-	-	-	+	geko
chr3R	6683284	6683484	201	*	6.05595	5.23484	6.57598	-0.697892	0.00568404	0.147833	55.67	39.15	18.15	101.05	126.11	59.05	0	3	-	-	-	+	+	+	Edg84A
chr2R	21463225	21463425	201	*	4.88062	4.19861	5.34185	-0.685319	0.0057207	0.148495	20.24	17.99	16.85	34.69	41.35	45.63	1	2	-	+	-	+	-	+	Sdc
chr3R	6818102	6818302	201	*	6.40749	5.58118	6.92957	-0.697413	0.00573219	0.148495	36.69	83.6	23.33	111.61	134.38	119.72	1	1	+	-	-	-	-	+	FBgn0026162
chr3L	741593	741793	201	*	5.29516	4.5937	5.76509	-0.684507	0.00573871	0.148495	27.83	26.46	18.15	60.33	62.02	40.8	1	1	+	-	-	-	-	+	hng3
chr2R	10437296	10437496	201	*	5.58334	4.83944	6.07172	-0.690945	0.00575539	0.148533	31.63	29.63	24.63	64.85	96.13	40.8	0	2	-	-	-	-	+	+	Galphao
chrX	12938261	12938461	201	*	6.38147	5.34452	6.97854	-0.690101	0.00576647	0.148533	60.73	50.79	10.37	113.11	207.77	57.44	2	3	+	+	-	+	+	+	fne
chr4	467358	467558	201	*	5.23542	4.44214	5.74432	-0.694112	0.00579048	0.148533	13.92	37.04	14.26	52.79	66.16	41.87	2	3	+	+	-	+	+	+	bip2
chr3L	8346401	8346601	201	*	5.59336	4.78239	6.10938	-0.695787	0.0057951	0.148533	37.96	26.46	18.15	70.88	100.27	35.97	2	3	+	+	-	+	+	+	CG7182
chr3L	13884770	13884970	201	*	5.37388	4.70016	5.83133	-0.682011	0.00580008	0.148533	22.77	25.4	29.81	43.74	73.39	53.68	1	1	-	-	+	-	-	+	dysc
chrX	16644575	16644775	201	*	4.91712	4.10735	5.43266	-0.695199	0.00580722	0.148533	17.71	27.51	6.48	37.7	53.75	38.12	2	3	+	+	-	+	+	+	mthl1
chr2R	24515206	24515406	201	*	6.56888	5.89465	7.02656	-0.680635	0.00580839	0.148533	68.32	63.49	46.67	129.7	152.99	108.44	3	3	+	+	+	+	+	+	Ir60b
chr3R	18021464	18021664	201	*	5.00916	4.23037	5.51214	-0.691359	0.00585948	0.149588	17.71	24.34	14.26	57.31	51.69	27.92	3	3	+	+	+	+	+	+	CG7785
chr2L	6374950	6375150	201	*	6.2201	5.52416	6.68759	-0.684846	0.00588755	0.150017	60.73	42.33	35	73.9	119.91	115.42	2	3	+	+	-	+	+	+	slam
chr3R	16683732	16683932	201	*	5.35069	4.6379	5.82563	-0.686331	0.00590089	0.150017	26.57	33.86	14.26	43.74	63.06	63.35	2	3	+	+	-	+	+	+	Ubx
chr3L	18173725	18173925	201	*	6.09385	5.35435	6.58036	-0.688699	0.00591337	0.150017	35.43	61.38	25.93	84.46	118.88	83.75	1	2	-	+	-	+	+	-	hid
chr2L	21107623	21107823	201	*	6.0358	5.31748	6.51317	-0.685816	0.00591563	0.150017	43.02	45.5	31.11	95.02	118.88	60.13	2	1	+	-	+	-	+	-	Nhe2
chr3R	29089493	29089693	201	*	5.6045	4.89995	6.07581	-0.684679	0.00593916	0.150363	45.55	23.28	20.74	69.38	73.39	59.59	2	3	+	+	-	+	+	+	CG11873
chrX	11154595	11154795	201	*	5.07605	4.16764	5.62914	-0.694704	0.00595587	0.150446	29.1	22.22	2.59	60.33	52.72	35.43	2	3	+	+	-	+	+	+	Dlic
chr3R	25163863	25164063	201	*	5.93644	5.16484	6.43646	-0.690998	0.00596215	0.150446	43.02	41.27	23.33	90.49	118.88	50.46	2	3	+	+	-	+	+	+
chr2L	19360012	19360212	201	*	5.14123	4.44705	5.60793	-0.680955	0.00598617	0.150802	25.3	23.28	16.85	49.77	57.89	38.65	3	3	+	+	+	+	+	+	dnt
chr2R	8654818	8655018	201	*	6.25473	5.49711	6.74891	-0.689575	0.00600767	0.151094	53.14	60.32	22.04	99.54	130.25	92.87	2	3	+	+	-	+	+	+	ptc
chr3L	1798685	1798885	201	*	5.25884	4.47764	5.76281	-0.690295	0.00602114	0.151183	25.3	28.57	12.96	58.82	71.33	32.75	1	1	-	-	+	-	-	+	Patj
chr3L	5187284	5187484	201	*	5.25777	4.55405	5.72872	-0.684002	0.00603641	0.151317	36.69	16.93	16.85	54.29	52.72	52.07	2	1	-	+	+	-	+	-	shep
chr2R	24063633	24063833	201	*	6.55018	5.85753	7.01619	-0.681162	0.00606727	0.15162	70.85	60.32	42.78	117.64	163.32	107.37	3	3	+	+	+	+	+	+	RpL39
chr3R	6812606	6812806	201	*	5.68132	4.96669	6.15706	-0.683998	0.00606839	0.15162	29.1	46.56	18.15	63.34	72.36	78.38	1	2	-	+	-	+	+	-	FBgn0261503
chr2L	1517184	1517384	201	*	5.87356	5.19538	6.33304	-0.678676	0.00608421	0.151767	35.43	43.39	31.11	61.84	106.47	73.55	2	2	+	+	-	-	+	+	halo
chr2L	3082976	3083176	201	*	5.25496	4.59081	5.70802	-0.676287	0.00609654	0.151826	24.04	27.51	20.74	42.23	63.06	51.54	1	1	-	+	-	-	-	+	toc
chr3R	21112406	21112606	201	*	5.74897	5.08791	6.2006	-0.673839	0.00611521	0.151892	30.36	44.45	27.22	73.9	78.56	68.18	1	3	-	+	-	+	+	+	Rab11
chr2R	6194267	6194467	201	*	6.0124	5.3195	6.47852	-0.681345	0.00613266	0.151892	40.49	50.79	28.52	67.87	84.76	114.89	1	1	+	-	-	-	-	+	Ptr
chr3L	23090293	23090493	201	*	5.33049	4.63244	5.79891	-0.679908	0.00613422	0.151892	24.04	29.63	20.74	52.79	72.36	41.87	3	3	+	+	+	+	+	+
chr2L	9464575	9464775	201	*	5.67442	4.83426	6.2019	-0.691844	0.00614663	0.151892	29.1	37.04	19.44	92	97.17	31.67	1	1	+	-	-	-	-	+
chr2R	17893108	17893308	201	*	6.36801	5.57545	6.87662	-0.69033	0.0061491	0.151892	61.99	60.32	20.74	119.15	142.65	90.73	1	3	-	+	-	+	+	+	Elk
chr2L	10265213	10265413	201	*	5.30446	4.5888	5.78066	-0.6834	0.00617527	0.151892	22.77	33.86	15.56	39.21	67.19	58.52	1	1	+	-	-	-	-	+	Rsf1
chr3L	19083268	19083468	201	*	6.60188	5.75679	7.13127	-0.691745	0.00617711	0.151892	31.63	99.47	31.11	143.28	131.28	146.02	1	3	+	-	-	+	+	+	Mkp3
chr3R	16678136	16678336	201	*	5.78262	5.0781	6.25391	-0.682069	0.00617893	0.151892	45.55	28.57	27.22	63.34	104.4	61.2	2	3	+	+	-	+	+	+	Ubx
chr3R	10788118	10788318	201	*	5.04563	4.23249	5.5625	-0.689868	0.00621425	0.152275	24.04	23.28	9.07	49.77	64.09	27.92	1	2	+	-	-	-	+	+	Mcm5
chr2R	6631447	6631647	201	*	6.24983	5.46265	6.75625	-0.68901	0.0062199	0.152275	59.46	50.79	22.04	122.16	131.28	70.86	2	3	+	+	-	+	+	+	Vha16-1
chr2L	11452786	11452986	201	*	6.74767	5.95524	7.25623	-0.689386	0.00623114	0.152275	65.79	93.12	27.22	141.77	163.32	153.54	0	2	-	-	-	-	+	+
chr3L	11253340	11253540	201	*	4.85011	4.13303	5.32693	-0.683426	0.00623506	0.152275	24.04	16.93	11.67	33.18	48.58	38.65	2	3	+	+	-	+	+	+	scyl
chr2R	16017035	16017235	201	*	5.38088	4.53807	5.9094	-0.690763	0.00624463	0.152275	39.22	20.11	10.37	66.36	79.59	34.36	0	2	-	-	-	-	+	+	Prosbeta1
chr3R	22133382	22133582	201	*	5.07385	4.31601	5.56813	-0.685023	0.00625443	0.152275	16.45	26.46	16.85	51.28	60.99	30.06	2	1	+	-	+	-	-	+	SKIP
chr2R	7061658	7061858	201	*	4.94827	4.15554	5.45695	-0.688848	0.0062793	0.152636	29.1	12.7	11.67	40.72	60.99	30.06	2	2	+	+	-	-	+	+	Pgant3
chr2R	21282189	21282389	201	*	6.06547	5.37956	6.52846	-0.676404	0.00630732	0.152955	44.28	50.79	29.81	98.03	107.5	71.4	2	3	+	+	-	+	+	+	MFS16
chrX	17802396	17802596	201	*	4.98475	4.1899	5.49429	-0.68799	0.00631251	0.152955	24.04	19.05	11.67	42.23	66.16	26.84	1	3	-	+	-	+	+	+	OdsH
chr2R	25227503	25227703	201	*	5.63184	4.81405	6.15056	-0.688995	0.00634929	0.153602	50.61	16.93	16.85	75.41	89.93	47.78	0	3	-	-	-	+	+	+	Kr
chr2L	21133846	21134046	201	*	4.91346	4.1804	5.3972	-0.68163	0.00636369	0.153707	13.92	27.51	12.96	40.72	46.52	39.19	2	3	+	-	+	+	+	+	Nhe2
chrX	1900644	1900844	201	*	5.42185	4.65603	5.91947	-0.685031	0.00639427	0.154137	21.51	35.98	18.15	49.77	89.93	41.87	0	2	-	-	-	+	-	+	arm
chr2R	8068114	8068314	201	*	5.94581	5.20206	6.43414	-0.683458	0.00640352	0.154137	48.08	45.5	16.85	82.95	101.3	75.16	1	2	+	-	-	+	+	-	lig
chr3R	25983361	25983561	201	*	5.95161	5.14826	6.46458	-0.68776	0.00641185	0.154137	60.73	27.51	18.15	78.43	118.88	67.64	2	0	-	+	+	-	-	-	Nf1
chr2R	11633250	11633450	201	*	6.2037	5.50333	6.67315	-0.677056	0.00649868	0.155675	59.46	45.5	31.11	113.11	116.81	76.23	1	1	+	-	-	-	+	-	CG9005
chr2R	502842	503042	201	*	5.3106	5.78684	4.59483	0.680399	0.00650766	0.155675	30.36	61.38	73.89	28.66	18.61	25.23	2	3	-	+	+	+	+	+	DIP-lambda
chr3R	13405155	13405355	201	*	6.22586	5.47664	6.71651	-0.682683	0.00651113	0.155675	54.4	57.14	22.04	104.06	127.15	84.28	1	1	+	-	-	-	+	-	yellow-e3
chr2L	9890711	9890911	201	*	5.37848	4.63003	5.8688	-0.681629	0.00651668	0.155675	29.1	29.63	15.56	63.34	75.46	36.51	2	3	+	+	-	+	+	+	CG4537
chr3L	16351865	16352065	201	*	5.00411	4.12392	5.54682	-0.68709	0.00653165	0.155789	27.83	17.99	6.48	61.84	54.79	23.62	2	3	+	+	-	+	+	+	Golgin104
chr3L	18745769	18745969	201	*	5.33003	4.527	5.84286	-0.685036	0.00655195	0.156028	11.39	37.04	20.74	64.85	70.29	37.04	1	1	+	-	-	+	-	-	MED11
chr3L	10867787	10867987	201	*	5.39509	4.72808	5.84946	-0.670303	0.00656471	0.156089	32.89	23.28	23.33	69.38	55.82	47.78	1	2	+	-	-	+	-	+	tna
chr3L	20694925	20695125	201	*	5.13342	4.45417	5.59338	-0.673204	0.00657852	0.156173	16.45	28.57	20.74	49.77	40.31	54.76	1	1	+	-	-	-	+	-	kni
chr2R	9882265	9882465	201	*	5.31914	4.64721	5.77576	-0.67077	0.00659228	0.156239	31.63	25.4	18.15	61.84	55.82	46.71	1	3	+	-	-	+	+	+	Sec24AB
chr2R	22322712	22322912	201	*	5.76421	5.03701	6.24543	-0.678547	0.00661586	0.156239	35.43	42.33	20.74	79.93	96.13	51.54	1	2	+	-	-	-	+	+	Gp150
chr3R	29040235	29040435	201	*	5.39718	4.76653	5.83454	-0.664342	0.00661969	0.156239	31.63	25.4	24.63	54.29	58.92	57.98	2	2	+	+	-	+	+	-	Pkc98E
chr3R	17401354	17401554	201	*	6.18451	5.40047	6.68966	-0.683881	0.0066223	0.156239	51.87	47.62	27.22	108.59	144.72	56.37	3	3	+	+	+	+	+	+	Sur-8
chr4	1122893	1123093	201	*	5.27927	4.54417	5.76389	-0.678972	0.00666069	0.156824	16.45	32.81	20.74	46.75	75.46	40.8	0	2	-	-	-	-	+	+	Arf102F
chr3R	4381534	4381734	201	*	5.13631	4.36688	5.63543	-0.682029	0.00666766	0.156824	30.36	21.16	10.37	52.79	63.06	33.28	3	3	+	+	+	+	+	+	Cont
chr4	879388	879588	201	*	5.53282	4.79473	6.01872	-0.67915	0.00670164	0.157221	17.71	37.04	28.52	55.8	92	46.71	1	3	+	-	-	+	+	+	unc-13
chr2L	14689256	14689456	201	*	5.80746	5.05074	6.30127	-0.680723	0.00670516	0.157221	45.55	37.04	16.85	93.51	89.93	53.15	2	2	+	+	-	-	+	+	osp
chr2R	8122668	8122868	201	*	5.8596	5.11239	6.3494	-0.680101	0.00673464	0.157669	51.87	28.57	23.33	84.46	106.47	53.68	3	3	+	+	+	+	+	+	Nup50
chr3L	640881	641081	201	*	5.40328	4.61656	5.90952	-0.681589	0.00678339	0.158159	22.77	39.15	11.67	58.82	78.56	42.95	3	3	+	+	+	+	+	+	FBgn0262451
chr3L	539918	540118	201	*	5.75476	5.06426	6.2198	-0.672634	0.00678526	0.158159	35.43	45.5	19.44	66.36	84.76	72.47	1	3	+	-	-	+	+	+	klar
chr3L	13379392	13379592	201	*	5.47517	4.81042	5.92851	-0.668958	0.00680847	0.158159	29.1	31.75	23.33	46.75	79.59	56.37	3	3	+	+	+	+	+	+	SNCF
chrX	1288948	1289148	201	*	5.10939	4.39419	5.58539	-0.6746	0.00682599	0.158159	25.3	22.22	15.56	49.77	60.99	33.28	2	3	+	+	-	+	+	+	CG32812
chr2L	8587982	8588182	201	*	5.67821	5.03454	6.12173	-0.663993	0.00682655	0.158159	37.96	37.04	23.33	67.87	73.39	67.64	3	3	+	+	+	+	+	+	Sema1a
chr4	492690	492890	201	*	5.13985	4.42197	5.61703	-0.676617	0.00682728	0.158159	22.77	28.57	12.96	33.18	63.06	51	1	2	-	+	-	-	+	+
chr2R	21635091	21635291	201	*	5.84914	5.13661	6.32397	-0.674909	0.00684714	0.158159	41.75	39.15	24.63	73.9	110.61	55.83	2	0	-	+	+	-	-	-	CG10321
chr4	663099	663299	201	*	6.08334	5.35676	6.5643	-0.676371	0.00686088	0.158159	22.77	56.09	44.07	93.51	115.77	74.62	3	3	+	+	+	+	+	+	Slip1
chr3R	15196455	15196655	201	*	6.13229	5.24458	6.67779	-0.682123	0.00688281	0.158159	63.26	34.92	15.56	104.06	148.85	54.22	1	1	+	-	-	-	-	+	CG6752
chr2R	4782822	4783022	201	*	4.99909	4.24829	5.4904	-0.678076	0.00688697	0.158159	27.83	20.11	9.07	46.75	53.75	34.36	0	3	-	-	-	+	+	+	FBgn0262970
chr3L	19603800	19604000	201	*	5.46709	4.66724	5.97865	-0.68082	0.00690175	0.158159	26.57	32.81	16.85	76.92	81.66	30.6	2	3	+	+	-	+	+	+	CG9368
chr2R	18357204	18357404	201	*	5.003	4.18135	5.52325	-0.682115	0.00690253	0.158159	32.89	13.76	7.78	43.74	62.02	32.21	2	3	+	+	-	+	+	+	sbb
chrX	3776470	3776670	201	*	5.7381	4.86792	6.27706	-0.682169	0.00690672	0.158159	48.08	31.75	7.78	70.88	106.47	55.3	2	1	+	+	-	-	+	-	FBgn0263532
chr2R	15954911	15955111	201	*	5.20222	4.51752	5.66466	-0.669465	0.00691436	0.158159	26.57	20.11	22.04	58.82	56.85	36.51	2	3	+	+	-	+	+	+	CG8366
chr3R	15379032	15379232	201	*	6.79166	5.91827	7.33183	-0.681897	0.00691848	0.158159	108.81	40.21	32.41	167.41	216.04	99.85	2	3	+	+	-	+	+	+	Rbp
chr3R	26006007	26006207	201	*	6.48151	5.83428	6.92671	-0.664176	0.00692451	0.158159	64.52	56.09	50.55	114.62	147.82	102.54	0	3	-	-	-	+	+	+	E(spl)mbeta-HLH
chr3R	24297690	24297890	201	*	6.46208	5.56021	7.0128	-0.681124	0.00693196	0.158159	39.22	86.77	15.56	105.57	166.43	115.42	1	1	+	-	-	-	+	-	crb
chr3L	3149067	3149267	201	*	5.97276	5.1729	6.48433	-0.680943	0.00694512	0.158222	51.87	43.39	12.96	82.95	113.71	71.94	2	2	+	+	-	-	+	+	Usp5
chr4	787568	787768	201	*	6.07442	5.30551	6.57333	-0.678846	0.00695638	0.158242	24.04	63.49	31.11	96.52	119.91	69.25	2	3	+	+	-	+	+	+	MED26
chr3R	14719302	14719502	201	*	5.65808	4.86276	6.16782	-0.680178	0.00698911	0.158332	46.81	27.51	12.96	75.41	93.03	47.24	1	3	+	-	-	+	+	+	kibra
chr4	835493	835693	201	*	5.62811	4.90008	6.10969	-0.674328	0.00700459	0.158332	29.1	42.33	18.15	69.38	87.86	49.93	1	3	-	+	-	+	+	+	Sox102F
chr2L	22114770	22114970	201	*	4.81355	4.03093	5.31811	-0.67822	0.00701167	0.158332	16.45	22.22	10.37	42.23	51.69	25.77	2	3	+	+	-	+	+	+
chrY	3503353	3503553	201	*	6.8025	6.07962	7.28184	-0.675035	0.00701682	0.158332	54.4	48.68	99.81	168.92	180.9	117.03	1	3	-	+	-	+	+	+
chr2R	15381313	15381513	201	*	5.81537	5.16189	6.26348	-0.66355	0.00702075	0.158332	37.96	37.04	32.41	78.43	94.07	57.98	1	3	+	-	-	+	+	+	dup
chr3R	25173850	25174050	201	*	5.87601	5.02103	6.4092	-0.680865	0.00702264	0.158332	56.93	27.51	12.96	98.03	106.47	50.46	1	1	+	-	-	-	-	+	lobo
chr2L	10232406	10232606	201	*	5.8672	5.07729	6.37473	-0.679216	0.00703634	0.158406	46.81	40.21	14.26	96.52	98.2	54.22	2	3	+	+	-	+	+	+	ova
chr3L	11587711	11587911	201	*	5.04693	4.18628	5.58228	-0.680276	0.00706814	0.158887	25.3	13.76	15.56	43.74	79.59	20.4	2	3	+	+	-	+	+	+	rt
chr3L	246564	246764	201	*	5.59529	4.82362	6.09534	-0.678378	0.00708524	0.158913	41.75	21.16	22.04	48.26	108.54	48.32	3	3	+	+	+	+	+	+	E(bx)
chr3R	27111864	27112064	201	*	5.92622	5.19222	6.41037	-0.674537	0.00712206	0.158913	50.61	37.04	22.04	82.95	113.71	58.52	0	3	-	-	-	+	+	+	CG5815
chr2L	9431386	9431586	201	*	5.86266	5.16484	6.33098	-0.670099	0.0071256	0.158913	43.02	41.27	23.33	75.41	105.44	60.66	3	3	+	+	+	+	+	+	scat
chr2R	22122796	22122996	201	*	5.38034	4.64984	5.86299	-0.673439	0.00712578	0.158913	30.36	30.69	14.26	57.31	76.49	40.8	1	1	+	-	-	-	-	+	mei-S332
chr3R	22034401	22034601	201	*	5.17743	4.46339	5.65291	-0.671191	0.00712879	0.158913	24.04	20.11	22.04	58.82	60.99	31.14	2	3	+	+	-	+	+	+	CG13409
chrX	15834775	15834975	201	*	5.21778	4.32907	5.76365	-0.679313	0.00713185	0.158913	12.65	35.98	11.67	49.77	84.76	28.45	2	1	+	+	-	-	+	-	Chc
chr3R	11209743	11209943	201	*	5.52372	4.83974	5.98583	-0.668101	0.00716017	0.159295	26.57	24.34	35	61.84	83.73	44.56	1	1	-	+	-	-	+	-	SdhC
chr2R	11191017	11191217	201	*	5.58366	4.81357	6.08306	-0.676798	0.00716989	0.159295	15.18	49.74	19.44	57.31	68.22	77.84	3	1	+	+	+	-	+	-	shn
chr3R	12712234	12712434	201	*	6.02903	5.2852	6.5174	-0.674223	0.00720533	0.159744	50.61	39.15	27.22	111.61	110.61	52.61	1	2	-	+	-	-	+	+	DNApol-theta
chr2L	22570142	22570342	201	*	5.19666	4.5217	5.65468	-0.665555	0.00721903	0.159744	22.77	25.4	20.74	45.25	66.16	39.73	0	2	-	-	-	+	+	-
chr3R	30046323	30046523	201	*	5.20516	4.52522	5.66543	-0.6655	0.007252	0.159744	20.24	30.69	18.15	46.75	62.02	43.48	1	1	+	-	-	-	-	+	RpL32
chr2L	10250645	10250845	201	*	5.42188	4.75196	5.87759	-0.665026	0.00726318	0.159744	31.63	23.28	25.93	54.29	77.53	44.56	3	3	+	+	+	+	+	+	bsk
chr3L	15142470	15142670	201	*	6.0992	5.38689	6.57393	-0.67022	0.00726623	0.159744	36.69	60.32	28.52	96.52	116.81	72.47	1	1	-	+	-	-	-	+	Pex3
chr2R	7485393	7485593	201	*	6.60835	5.79331	7.12599	-0.677484	0.00728651	0.159744	87.3	51.85	27.22	119.15	199.5	100.39	0	2	-	-	-	-	+	+	wech
chr3R	14326950	14327150	201	*	5.57945	4.88857	6.04466	-0.666997	0.00729737	0.159744	35.43	27.51	25.93	72.39	82.7	42.95	2	3	+	+	-	+	+	+	spn-B
chr3R	5788988	5789188	201	*	5.02424	4.25352	5.5239	-0.675248	0.00730878	0.159744	29.1	19.05	9.07	42.23	63.06	32.75	3	3	+	+	+	+	+	+	Rpn5
chr2R	10569406	10569606	201	*	5.01079	4.34078	5.46654	-0.664476	0.00731106	0.159744	22.77	21.16	16.85	39.21	54.79	38.65	1	1	+	-	-	-	-	+	psq
chr3R	2313674	2313874	201	*	4.81798	4.07538	5.30581	-0.671682	0.00731218	0.159744	16.45	21.16	12.96	43.74	47.55	27.38	0	2	-	-	-	+	-	+	Myo81F
chr2R	13577727	13577927	201	*	5.57742	4.94403	6.01608	-0.658313	0.00731508	0.159744	37.96	23.28	31.11	67.87	66.16	60.13	1	1	+	-	-	+	-	-	FBgn0265497
chrX	8411611	8411811	201	*	5.81898	4.96346	6.35238	-0.677192	0.00732309	0.159744	43.02	40.21	10.37	57.31	127.15	60.66	2	3	+	+	-	+	+	+	Trf2
chr4	1063381	1063581	201	*	5.50235	4.72559	6.00451	-0.675166	0.00732772	0.159744	12.65	43.39	23.33	55.8	85.8	51	1	3	+	-	-	+	+	+	Zyx
chrX	3861234	3861434	201	*	5.83135	5.10543	6.31202	-0.671088	0.0073553	0.159744	36.69	49.74	16.85	72.39	95.1	70.86	2	1	+	+	-	-	-	+	FBgn0019661
chr4	1041348	1041548	201	*	5.25313	4.50782	5.74212	-0.67182	0.00735652	0.159744	15.18	34.92	18.15	55.8	67.19	37.58	3	3	+	+	+	+	+	+	CaMKII
chr3R	19148030	19148230	201	*	5.10101	4.38368	5.57795	-0.669486	0.00735782	0.159744	20.24	19.05	23.33	52.79	60.99	29.53	1	2	+	-	-	-	+	+	Ppcs
chr2R	12173228	12173428	201	*	6.03765	5.41796	6.46974	-0.653856	0.00738451	0.15975	41.75	47.62	38.89	82.95	100.27	82.67	3	3	+	+	+	+	+	+	CCT5
chrX	1621949	1622149	201	*	5.00891	4.22286	5.51487	-0.674948	0.00738517	0.15975	25.3	19.05	11.67	45.25	66.16	25.77	0	2	-	-	-	+	+	-	Mur2B
chr3L	10862745	10862945	201	*	6.53936	5.81016	7.02144	-0.671397	0.00738952	0.15975	37.96	88.89	41.48	117.64	140.58	131.53	3	3	+	+	+	+	+	+	tna
chr2L	2451067	2451267	201	*	6.54107	5.78625	7.03408	-0.673381	0.00740052	0.159761	70.85	68.78	25.93	143.28	145.75	104.15	0	2	-	-	-	+	+	-	dpp
chr2R	24062351	24062551	201	*	5.10155	4.34691	5.59449	-0.672667	0.00748188	0.160294	31.63	19.05	10.37	40.72	67.19	37.04	1	2	+	-	-	+	-	+	RpL39
chr2L	601638	601838	201	*	5.73693	5.09083	6.18159	-0.657189	0.00749577	0.160294	31.63	43.39	27.22	76.92	78.56	62.27	1	1	-	+	-	-	-	+	CG13689
chr3R	27272867	27273067	201	*	6.66218	5.88662	7.16384	-0.673477	0.00751153	0.160294	43.02	99.47	35	129.7	170.56	129.92	3	3	+	+	+	+	+	+	l(3)mbt
chr3L	16580169	16580369	201	*	4.89697	4.14666	5.38809	-0.670101	0.00751452	0.160294	17.71	21.16	14.26	51.28	48.58	25.77	1	1	+	-	-	-	+	-	Rpn12
chr2R	10099867	10100067	201	*	6.08851	5.32289	6.58604	-0.673113	0.00751471	0.160294	64.52	29.63	25.93	93.51	129.21	65.5	1	1	+	-	-	-	+	-	14-3-3zeta
chr3R	9039682	9039882	201	*	5.73845	5.10044	6.1793	-0.656006	0.00751686	0.160294	32.89	40.21	29.81	69.38	86.83	61.2	3	3	+	+	+	+	+	+	neur
chr3L	16078905	16079105	201	*	4.96354	4.23996	5.44319	-0.668288	0.0075187	0.160294	16.45	28.57	11.67	40.72	51.69	38.12	3	3	+	+	+	+	+	+	Mbs
chr3R	9031722	9031922	201	*	5.89337	5.13827	6.3865	-0.671699	0.00752558	0.160294	30.36	57.14	18.15	79.93	102.34	68.72	1	1	+	-	-	-	-	+	neur
chrX	15835397	15835597	201	*	4.97615	4.22053	5.4695	-0.670294	0.00753299	0.160294	13.92	26.46	15.56	52.79	51.69	28.45	1	1	-	+	-	-	+	-	Chc
chr2R	24033837	24034037	201	*	5.61715	4.90917	6.08998	-0.667418	0.00753862	0.160294	40.49	32.81	16.85	63.34	87.86	53.15	2	3	+	+	-	+	+	+	Chi
chr3R	8447379	8447579	201	*	5.03558	4.32708	5.50863	-0.669601	0.00754091	0.160294	27.83	11.64	20.74	33.18	60.99	42.41	3	3	+	+	+	+	+	+	CG45263
chr4	936454	936654	201	*	5.91693	5.18779	6.39899	-0.669104	0.00755763	0.160404	34.16	51.85	23.33	81.44	112.67	59.05	1	3	-	+	-	+	+	+	mGluR
chrX	3740814	3741014	201	*	6.43124	5.52906	6.98207	-0.672685	0.00758114	0.160404	91.09	25.4	22.04	132.72	163.32	83.21	2	1	-	+	+	+	-	-	Tlk
chr3R	9399194	9399394	201	*	6.52779	5.84854	6.98776	-0.663025	0.00758326	0.160404	55.67	78.31	38.89	143.28	119.91	117.57	3	3	+	+	+	+	+	+	Or85f
chr2R	21248992	21249192	201	*	5.7543	5.04728	6.2267	-0.666793	0.00759336	0.160404	45.55	38.1	15.56	78.43	77.53	68.72	1	2	-	+	-	-	+	+	ASPP
chrX	8437718	8437918	201	*	5.77326	4.99052	6.27786	-0.672825	0.00760179	0.160404	43.02	38.1	14.26	64.85	113.71	54.22	1	2	+	-	-	+	+	-	Miga
chr3L	223684	223884	201	*	5.58269	4.94605	6.02289	-0.654703	0.00760923	0.160404	31.63	34.92	25.93	64.85	75.46	54.76	0	2	-	-	-	-	+	+	pyx
chr3L	19897500	19897700	201	*	6.79103	6.09604	7.25808	-0.665359	0.0076404	0.16066	92.36	68.78	44.07	143.28	187.1	128.84	1	1	+	-	-	-	-	+	Su(Tpl)
chr3R	19341947	19342147	201	*	5.64316	4.82006	6.16399	-0.673163	0.00766219	0.16066	34.16	40.21	10.37	72.39	99.24	43.48	1	1	+	-	-	-	+	-
chr3L	21285944	21286144	201	*	6.76083	5.83309	7.32087	-0.670286	0.00767139	0.16066	110.07	40.21	20.74	144.79	225.35	109.52	2	3	+	+	-	+	+	+	CG12974
chr3L	12432611	12432811	201	*	5.56748	4.76812	6.07885	-0.672717	0.0076785	0.16066	43.02	17.99	20.74	61.84	103.37	37.58	0	3	-	-	-	+	+	+	toe
chr3L	11927378	11927578	201	*	6.25725	5.46373	6.76625	-0.67253	0.00767996	0.16066	54.4	62.44	15.56	101.05	96.13	129.38	2	1	+	+	-	-	-	+	byn
chr3L	13350248	13350448	201	*	4.88068	4.22233	5.33106	-0.659094	0.0076846	0.16066	16.45	20.11	19.44	40.72	40.31	39.73	3	3	+	+	+	+	+	+	CG17687
chr3L	3069870	3070070	201	*	5.61945	4.85933	6.11468	-0.670355	0.00770395	0.160725	45.55	28.57	12.96	79.93	78.56	49.39	2	3	+	+	-	+	+	+	PAN3
chr2R	4618207	4618407	201	*	5.0996	4.38135	5.57694	-0.66625	0.00770883	0.160725	18.98	25.4	18.15	42.23	68.22	32.75	3	3	+	+	+	+	+	+	CG17486
chr2L	16302823	16303023	201	*	5.72286	4.95687	6.22055	-0.670412	0.00772013	0.160741	36.69	37.04	19.44	75.41	107.5	40.8	1	3	+	-	-	+	+	+	heix
chr3R	25888930	25889130	201	*	5.84755	5.12482	6.32684	-0.66685	0.00774294	0.160996	37.96	43.39	23.33	72.39	114.74	53.68	3	3	+	+	+	+	+	+	Lnk
chr2R	20081277	20081477	201	*	5.89874	5.24278	6.34801	-0.656858	0.00777702	0.16146	44.28	43.39	25.93	96.52	77.53	70.33	1	2	-	+	-	-	+	+
chr2R	18133626	18133826	201	*	5.75529	5.03169	6.23495	-0.666709	0.00778644	0.16146	40.49	43.39	14.26	69.38	87.86	68.72	0	2	-	-	-	+	+	-	Hsf
chr3R	15278558	15278758	201	*	5.38706	4.65366	5.87096	-0.666358	0.00781699	0.161516	26.57	35.98	12.96	61.84	71.33	42.41	2	3	-	+	+	+	+	+	Tm1
chr2L	16330713	16330913	201	*	5.76295	4.88474	6.30492	-0.670742	0.00784089	0.161516	49.34	32.81	6.48	92	90.97	54.22	2	2	+	-	+	-	+	+	mRpL4
chr3R	6941615	6941815	201	*	5.1349	4.39874	5.61999	-0.665963	0.00785945	0.161516	21.51	27.51	14.26	51.28	65.12	31.14	1	2	-	+	-	-	+	+	Antp
chr3L	9485296	9485496	201	*	5.29365	4.60341	5.75859	-0.662286	0.007871	0.161516	31.63	29.63	11.67	49.77	57.89	54.76	1	1	+	-	-	-	+	-	Jarid2
chr4	1182851	1183051	201	*	4.99915	4.19134	5.51391	-0.669835	0.00787959	0.161516	16.45	25.4	12.96	63.34	50.65	23.08	2	3	+	+	-	+	+	+	pho
chr3R	7102904	7103104	201	*	5.88346	5.15771	6.36405	-0.666365	0.0078829	0.161516	50.61	37.04	19.44	67.87	112.67	66.57	1	3	-	+	-	+	+	+	Alh
chr3L	26570183	26570383	201	*	6.77697	6.05187	7.25728	-0.666058	0.0078915	0.161516	63.26	99.47	36.3	144.79	163.32	150.85	2	3	+	+	-	+	+	+
chr3L	15508943	15509143	201	*	6.99133	6.29731	7.45795	-0.662584	0.00791083	0.161516	46.81	110.06	79.07	164.39	190.2	172.86	2	3	+	+	-	+	+	+	MsrA
chr2R	17536278	17536478	201	*	5.79491	5.12071	6.25258	-0.659569	0.00792008	0.161516	46.81	26.46	31.11	81.44	92	55.3	2	0	+	+	-	-	-	-	eIF3b
chr2L	6339252	6339452	201	*	7.04424	6.29531	7.53477	-0.66791	0.00792366	0.161516	121.46	68.78	45.37	170.43	238.78	147.1	1	3	+	-	-	+	+	+	Cpr
chr2R	24664958	24665158	201	*	5.58195	4.9247	6.03182	-0.658177	0.00792439	0.161516	34.16	34.92	22.04	45.25	78.56	72.47	0	2	-	-	-	-	+	+	ND-19
chr3R	23315291	23315491	201	*	6.60583	5.81535	7.11359	-0.669684	0.00793535	0.161516	88.56	51.85	28.52	144.79	177.8	92.87	1	1	+	-	-	-	+	-	pnt
chr3R	4989375	4989575	201	*	5.24191	4.50354	5.72794	-0.666264	0.00793666	0.161516	34.16	22.22	11.67	55.8	66.16	37.04	1	2	-	-	+	-	+	+	plh
chr2L	10249767	10249967	201	*	6.77178	5.994	7.27434	-0.669225	0.00793749	0.161516	97.42	61.38	32.41	153.84	200.54	110.05	1	1	-	+	-	-	+	-	bsk
chr3R	24625567	24625767	201	*	7.05251	6.35636	7.52009	-0.662514	0.00796739	0.161691	99.95	71.96	73.89	161.38	261.53	127.77	3	3	+	+	+	+	+	+	Syx18
chr3L	8189242	8189442	201	*	6.83507	6.0671	7.33358	-0.668377	0.00797416	0.161691	78.44	94.18	28.52	144.79	185.03	154.07	1	3	-	+	-	+	+	+	ERR
chr3L	1034247	1034447	201	*	6.14059	5.47599	6.59385	-0.658193	0.00797795	0.161691	63.26	39.15	31.11	88.98	110.61	90.19	1	1	+	-	-	-	+	-	trio
chr3L	18904834	18905034	201	*	5.07948	4.3792	5.5489	-0.660478	0.00802072	0.162255	22.77	25.4	14.26	49.77	56.85	33.82	0	2	-	-	-	-	+	+	CSN1b
chr3L	7155932	7156132	201	*	5.47969	4.83102	5.92555	-0.654865	0.00802706	0.162255	37.96	25.4	22.04	55.8	73.39	53.15	3	3	+	+	+	+	+	+	CG8620
chr2L	10239224	10239424	201	*	5.73331	5.01655	6.20999	-0.662593	0.00805441	0.16255	24.04	49.74	23.33	78.43	88.9	54.76	1	1	+	-	-	-	+	-	me31B
chr2R	21246956	21247156	201	*	5.68784	4.98869	6.15675	-0.66114	0.00806298	0.16255	32.89	45.5	16.85	64.85	84.76	64.42	1	1	-	+	-	-	+	-	ASPP
chr3R	17540349	17540549	201	*	5.13125	4.42028	5.60538	-0.661625	0.00809356	0.162766	21.51	23.28	19.44	48.26	67.19	30.6	1	1	+	-	-	-	+	-	l(3)07882
chr2R	10809553	10809753	201	*	6.03839	5.34538	6.50456	-0.660267	0.00810682	0.162766	48.08	51.85	22.04	85.97	107.5	78.92	3	3	+	+	+	+	+	+	wde
chr3L	16564346	16564546	201	*	5.47394	4.70574	5.97254	-0.666641	0.0081137	0.162766	34.16	28.57	15.56	57.31	95.1	35.97	3	3	+	+	+	+	+	+	Mipp1
chr3R	12222199	12222399	201	*	5.13359	4.30258	5.65751	-0.668249	0.00811887	0.162766	30.36	15.87	12.96	66.36	63.06	22.01	1	1	-	+	-	-	-	+	Cog1
chr2R	19395858	19396058	201	*	5.94171	5.304	6.38242	-0.651847	0.00813079	0.162766	50.61	38.1	29.81	76.92	98.2	75.16	0	2	-	-	-	+	+	-	cer
chr3L	19569106	19569306	201	*	4.88023	4.11362	5.37818	-0.66559	0.00814559	0.162766	13.92	21.16	16.85	42.23	58.92	23.62	3	1	+	+	+	-	-	+	Shal
chr2L	8266837	8267037	201	*	5.58523	4.90515	6.04557	-0.65765	0.00815393	0.162766	36.69	28.57	24.63	69.38	84.76	44.02	3	3	+	+	+	+	+	+	Btk29A
chr3L	711744	711944	201	*	5.11621	4.42255	5.58267	-0.658878	0.00818464	0.162766	22.77	16.93	24.63	57.31	54.79	31.67	2	0	+	+	-	-	-	-	CkIIalpha-i3
chr3L	9462986	9463186	201	*	5.77557	5.12153	6.22394	-0.653224	0.00819909	0.162766	37.96	44.45	22.04	73.9	82.7	67.64	0	2	-	-	-	-	+	+	CG3434
chr2R	13958094	13958294	201	*	5.1121	4.31037	5.62442	-0.667245	0.00820114	0.162766	36.69	13.76	9.07	42.23	69.26	36.51	2	3	-	+	+	+	+	+	Cp1
chr4	482709	482909	201	*	5.74513	4.96019	6.25064	-0.66641	0.00820514	0.162766	21.51	55.03	16.85	64.85	101.3	62.27	1	3	-	+	-	+	+	+	Asator
chr2R	11107483	11107683	201	*	5.21291	4.44956	5.7095	-0.665021	0.00820615	0.162766	30.36	22.22	12.96	61.84	66.16	28.99	1	2	-	+	-	-	+	+	luna
chr3R	22726873	22727073	201	*	5.33533	4.67247	5.7878	-0.655362	0.00821252	0.162766	30.36	25.4	20.74	46.75	74.43	44.56	2	2	-	+	+	-	+	+	Irp-1A
chr3R	20762643	20762843	201	*	5.41573	4.76195	5.86398	-0.652996	0.00822854	0.16279	22.77	27.51	31.11	57.31	73.39	44.02	1	3	-	+	-	+	+	+	Syp
chr2R	19142193	19142393	201	*	5.35918	4.7117	5.80449	-0.650874	0.00823707	0.16279	25.3	33.86	19.44	58.82	58.92	49.93	3	3	+	+	+	+	+	+	ena
chrX	6863659	6863859	201	*	5.18545	4.35119	5.71065	-0.666894	0.00824827	0.16279	3.8	32.81	24.63	60.33	51.69	45.1	2	3	+	+	-	+	+	+	CG14434
chr2R	23526917	23527117	201	*	6.65921	5.93721	7.13817	-0.662182	0.00826499	0.16279	54.4	93.12	36.3	125.18	166.43	130.99	2	3	+	+	-	+	+	+	mi
chr3L	18139238	18139438	201	*	7.23447	6.4344	7.74613	-0.666173	0.00829198	0.16279	54.4	154.5	50.55	217.18	247.05	179.84	3	3	+	+	+	+	+	+	geko
chr3R	24046936	24047136	201	*	5.35018	4.63645	5.82553	-0.660731	0.00829284	0.16279	25.3	28.57	20.74	46.75	85.8	37.58	2	2	+	+	-	-	+	+	Rox8
chrX	11796972	11797172	201	*	5.44149	4.67315	5.94015	-0.664673	0.00830324	0.16279	27.83	37.04	11.67	51.28	88.9	44.02	1	1	-	+	-	-	-	+	CkIIbeta
chrX	3742287	3742487	201	*	6.07192	5.10014	6.64735	-0.659236	0.00830854	0.16279	74.65	12.7	15.56	88.98	146.79	64.96	1	1	-	+	-	+	-	-	Tlk
chr3L	10676653	10676853	201	*	5.68702	5.028	6.13771	-0.653894	0.00832738	0.16279	36.69	39.15	22.04	55.8	89.93	65.5	3	1	+	+	+	-	-	+	simj
chr3R	8993249	8993449	201	*	5.62704	4.94605	6.0878	-0.655448	0.0083285	0.16279	31.63	34.92	25.93	79.93	80.63	43.48	3	3	+	+	+	+	+	+	CG11975
chr3L	10288306	10288506	201	*	5.52702	4.70475	6.04751	-0.665927	0.00833125	0.16279	20.24	47.62	10.37	64.85	85.8	47.78	0	2	-	-	-	+	-	+	FBgn0267665
chr3R	16950970	16951170	201	*	4.94906	4.29398	5.39791	-0.65349	0.00835121	0.162843	25.3	17.99	15.56	39.21	47.55	39.73	3	3	+	+	+	+	+	+	Abd-B
chr3L	15826790	15826990	201	*	5.82662	5.13126	6.29385	-0.657407	0.00836798	0.162843	32.89	47.62	24.63	82.95	98.2	54.22	2	3	+	+	-	+	+	+	DCP2
chr3L	8346111	8346311	201	*	5.92308	5.2226	6.39258	-0.658048	0.00836893	0.162843	41.75	39.15	31.11	108.59	94.07	49.39	0	2	-	-	-	-	+	+	CG7182
chr2L	6566100	6566300	201	*	5.82475	5.16064	6.27779	-0.653183	0.00838569	0.162843	41.75	37.04	28.52	82.95	96.13	53.68	2	2	+	-	+	+	+	-	CG13766
chr2R	11650989	11651189	201	*	6.34601	5.58086	6.84335	-0.663915	0.00838737	0.162843	59.46	58.2	25.93	119.15	156.09	69.25	2	3	+	+	-	+	+	+	FBgn0011915
chrX	2518023	2518223	201	*	4.90872	4.03852	5.44768	-0.664868	0.00840692	0.163015	25.3	20.11	3.89	45.25	60.99	24.69	1	2	-	+	-	-	+	+	trol
chr2L	11206948	11207148	201	*	5.93555	5.1148	6.45544	-0.664553	0.00847105	0.163887	48.08	45.5	10.37	79.93	117.84	65.5	2	3	+	+	-	+	+	+	FBgn0264441
chr3R	25172437	25172637	201	*	6.38316	5.67401	6.85651	-0.658387	0.00847342	0.163887	37.96	69.84	45.37	146.29	124.04	77.31	1	3	+	-	-	+	+	+	lobo
chr3R	6848736	6848936	201	*	6.92139	6.13977	7.42554	-0.663213	0.0085491	0.16485	108.81	67.73	35	152.33	236.72	126.7	1	1	+	-	-	-	-	+	Scr
chr3L	13378406	13378606	201	*	7.276	6.56906	7.74837	-0.657737	0.00859354	0.16485	72.12	149.21	63.52	226.23	219.14	199.71	1	2	+	-	-	-	+	+	SNCF
chr2L	10263471	10263671	201	*	6.179	5.43471	6.66755	-0.660679	0.00859709	0.16485	51.87	57.14	20.74	98.03	132.31	74.62	2	3	+	+	-	+	+	+	Rsf1
chr3L	17237661	17237861	201	*	4.96298	4.30768	5.41195	-0.64925	0.00861122	0.16485	16.45	22.22	20.74	48.26	41.35	38.12	2	2	+	+	-	-	+	+	Rbp6
chr2L	2456635	2456835	201	*	6.67924	5.97148	7.15197	-0.657487	0.00861139	0.16485	46.81	97.36	44.07	158.36	128.18	140.12	0	3	-	-	-	+	+	+	dpp
chrX	8654020	8654220	201	*	5.94165	5.13251	6.45694	-0.662909	0.00861504	0.16485	22.77	65.61	16.85	95.02	98.2	70.33	1	3	-	+	-	+	+	+
chr3R	14308961	14309161	201	*	5.71633	5.0202	6.1839	-0.655073	0.00862364	0.16485	29.1	42.33	25.93	79.93	92	46.17	1	2	-	+	-	+	+	-	su(Hw)
chr3R	18398511	18398711	201	*	5.85053	5.05362	6.3609	-0.662557	0.00863451	0.16485	41.75	42.33	15.56	78.43	121.98	46.17	2	3	+	+	-	+	+	+	Vha100-2
chr3L	1352186	1352386	201	*	5.84935	5.20793	6.29181	-0.647676	0.00865478	0.16485	40.49	32.81	37.59	79.93	98.2	56.91	0	2	-	-	-	-	+	+	312
chr2R	4788100	4788300	201	*	5.2389	4.5204	5.71634	-0.657157	0.00865969	0.16485	25.3	25.4	18.15	55.8	71.33	30.6	1	1	-	+	-	-	-	+	CG12547
chr3L	10863252	10863452	201	*	5.78621	5.11824	6.24102	-0.65181	0.00866204	0.16485	37.96	45.5	20.74	69.38	90.97	66.57	3	3	+	+	+	+	+	+	tna
chr2R	13858590	13858790	201	*	5.65772	4.93136	6.13858	-0.658874	0.00867684	0.16485	41.75	26.46	23.33	60.33	106.47	44.56	2	3	+	+	-	+	+	+	CG6553
chr2R	18304846	18305046	201	*	6.65716	5.92703	7.13965	-0.659274	0.008683	0.16485	74.65	79.37	28.52	119.15	151.95	151.93	3	3	+	+	+	+	+	+	CG14505
chr3R	13981038	13981238	201	*	5.08654	4.42353	5.53907	-0.649959	0.00868446	0.16485	25.3	22.22	16.85	49.77	53.75	35.97	0	2	-	-	-	-	+	+	rdx
chr2R	13545445	13545645	201	*	5.7866	5.08387	6.2571	-0.656793	0.00868544	0.16485	43.02	32.81	25.93	57.31	115.77	56.37	0	2	-	-	-	+	+	-	CG6145
chr2L	8846116	8846316	201	*	5.87159	5.18232	6.33608	-0.653608	0.00871972	0.165295	31.63	53.97	23.33	87.47	89.93	64.96	1	3	-	+	-	+	+	+
chrX	12926152	12926352	201	*	6.25061	5.44577	6.76418	-0.661741	0.00873358	0.165352	39.22	65.61	25.93	99.54	166.43	60.13	2	3	+	+	-	+	+	+	fne
chr3R	24057294	24057494	201	*	6.23794	5.44539	6.74655	-0.661567	0.00874656	0.165392	77.18	32.81	20.74	93.51	140.58	88.04	3	3	+	+	+	+	+	+	Hsp68
chr2R	24402897	24403097	201	*	5.52759	4.85095	5.98637	-0.651349	0.00876511	0.165538	31.63	38.1	16.85	67.87	71.33	51	2	1	-	+	+	-	-	+	Rpn8
chr3L	20427587	20427787	201	*	5.6733	4.96131	6.1479	-0.655134	0.00882599	0.166362	30.36	30.69	32.41	95.02	79.59	38.12	1	2	-	+	-	+	-	+	CG5282
chr4	314765	314965	201	*	6.40349	5.69043	6.87854	-0.655745	0.0088597	0.166362	43.02	73.02	38.89	110.1	160.22	82.67	1	3	+	-	-	+	+	+	Zip102B
chrX	8561956	8562156	201	*	5.84009	5.07468	6.33754	-0.659194	0.00887671	0.166362	39.22	47.62	14.26	70.88	112.67	59.05	1	2	-	+	-	+	+	-	CG12112
chr3L	19086339	19086539	201	*	6.19409	5.5502	6.63771	-0.64594	0.00888199	0.166362	53.14	55.03	32.41	111.61	103.37	83.75	1	1	+	-	-	-	-	+	Mkp3
chr2R	8069199	8069399	201	*	5.46127	4.73023	5.94414	-0.657282	0.00888247	0.166362	36.69	33.86	9.07	57.31	65.12	62.27	2	2	+	+	-	-	+	+	lig
chr2R	24188106	24188306	201	*	5.88913	5.14984	6.37555	-0.657779	0.00889893	0.166362	50.61	33.86	22.04	72.39	123.01	53.68	1	2	-	+	-	-	+	+	ocm
chr3R	16624763	16624963	201	*	5.82151	5.11329	6.29444	-0.65465	0.00889954	0.166362	34.16	35.98	33.7	82.95	109.57	42.95	1	2	+	-	-	+	+	-	CG14905
chr3L	2107506	2107706	201	*	5.19166	4.33476	5.72558	-0.660043	0.00890828	0.166362	12.65	34.92	12.96	66.36	68.22	24.16	3	3	+	+	+	+	+	+	sls
chr3L	21047858	21048058	201	*	6.18546	5.46817	6.66237	-0.655705	0.00890964	0.166362	58.2	48.68	25.93	108.59	128.18	67.11	2	3	+	+	-	+	+	+	siz
chr3L	13081572	13081772	201	*	6.53233	5.77477	7.0265	-0.658627	0.0089179	0.166362	82.24	56.09	25.93	149.31	146.79	95.02	2	0	+	+	-	-	-	-	FBgn0263661
chrX	2307589	2307789	201	*	5.61821	4.88567	6.10173	-0.656039	0.00893546	0.166486	26.57	46.56	15.56	73.9	81.66	50.46	0	2	-	-	-	+	-	+	Raf
chr2R	10807838	10808038	201	*	5.63775	4.94314	6.10464	-0.652536	0.00894854	0.166526	39.22	34.92	18.15	73.9	84.76	47.78	1	1	-	+	-	-	-	+	wde
chr4	396557	396757	201	*	5.43485	4.68451	5.92597	-0.657852	0.00896431	0.166616	43.02	21.16	12.96	58.82	80.63	42.95	1	2	-	+	-	-	+	+	dati
chr3R	5061969	5062169	201	*	4.96313	4.28284	5.42358	-0.649199	0.00900268	0.166762	18.98	26.46	12.96	48.26	42.38	38.12	0	2	-	-	-	+	+	-
chr3L	14049856	14050056	201	*	5.17995	4.42631	5.67246	-0.656919	0.0090257	0.166762	20.24	22.22	22.04	51.28	76.49	25.23	2	3	-	+	+	+	+	+	CG6833
chr3L	21517040	21517240	201	*	5.98139	5.27083	6.45535	-0.654198	0.00902677	0.166762	49.34	44.45	22.04	78.43	120.94	63.88	2	3	+	-	+	+	+	+	SAK
chrX	2325733	2325933	201	*	5.62788	4.80353	6.1492	-0.658957	0.00902678	0.166762	30.36	39.15	14.26	52.79	120.94	39.19	1	2	-	+	-	+	+	-	Raf
chr4	502358	502558	201	*	5.60729	4.80125	6.12133	-0.658902	0.00903165	0.166762	51.87	20.11	11.67	64.85	94.07	49.93	1	3	+	-	-	+	+	+	zfh2
chr3L	9373832	9374032	201	*	5.38585	4.64144	5.87446	-0.65647	0.00903782	0.166762	34.16	26.46	14.26	55.8	84.76	35.43	1	1	-	-	+	-	+	-	Hsp22
chr2L	568210	568410	201	*	5.44305	4.66694	5.94493	-0.657911	0.00907695	0.16688	37.96	20.11	18.15	52.79	98.2	33.82	1	1	+	-	-	-	+	-	Nle
chrX	6694936	6695136	201	*	4.94074	4.17242	5.4394	-0.65676	0.00907883	0.16688	16.45	28.57	9.07	42.23	57.89	30.06	3	3	+	+	+	+	+	+	CG14442
chr2R	16950317	16950517	201	*	4.99089	4.2882	5.46137	-0.652644	0.00908361	0.16688	10.12	26.46	22.04	37.7	55.82	38.65	0	2	-	-	-	-	+	+	CG34190
chr4	1123969	1124169	201	*	6.00154	5.32625	6.4597	-0.649704	0.00909818	0.16688	31.63	55.03	33.7	67.87	118.88	77.31	0	2	-	-	-	-	+	+	Arf102F
chr2R	21634572	21634772	201	*	6.05164	5.19972	6.58366	-0.657763	0.00909894	0.16688	60.73	39.15	10.37	92	130.25	65.5	2	1	+	-	+	-	-	+	CG10321
chr3R	9015248	9015448	201	*	5.28397	4.61239	5.74044	-0.646997	0.00913665	0.166992	22.77	28.57	22.04	60.33	64.09	35.97	3	3	+	+	+	+	+	+	Kcmf1
chr3R	16280811	16281011	201	*	5.71214	5.00128	6.18624	-0.653349	0.00914291	0.166992	43.02	34.92	18.15	60.33	103.37	54.76	1	2	+	-	-	+	+	-	gish
chr3L	19035875	19036075	201	*	5.32982	4.54331	5.83596	-0.657036	0.00915004	0.166992	27.83	31.75	10.37	67.87	72.36	31.14	1	2	-	-	+	-	+	+	nkd
chr2L	2449805	2450005	201	*	5.86269	5.17148	6.32806	-0.65203	0.00916002	0.166992	51.87	38.1	18.15	63.34	83.73	93.95	3	3	+	+	+	+	+	+	dpp
chrX	18101240	18101440	201	*	4.82839	3.91174	5.38446	-0.655464	0.00917655	0.166992	16.45	22.22	6.48	48.26	62.02	15.03	2	2	+	+	-	-	+	+	Taf8
chr3R	9065006	9065206	201	*	5.59783	4.81719	6.10158	-0.656909	0.00918003	0.166992	36.69	34.92	12.96	61.84	103.37	40.8	3	3	+	+	+	+	+	+	beag
chr3L	15508416	15508616	201	*	5.43043	4.81697	5.85951	-0.638312	0.00921189	0.166992	32.89	29.63	22.04	61.84	51.69	60.66	1	1	+	-	-	-	-	+	MsrA
chr3R	2960426	2960626	201	*	4.93225	4.18143	5.42357	-0.654534	0.00921737	0.166992	17.71	21.16	15.56	46.75	58.92	23.08	1	2	-	+	-	+	+	-	Pzl
chr3R	11302561	11302761	201	*	5.18044	4.38027	5.69214	-0.656703	0.00924588	0.166992	31.63	12.7	18.15	66.36	65.12	23.62	2	2	+	+	-	-	+	+	FBgn0051386
chr3L	19899382	19899582	201	*	6.31118	5.52931	6.81543	-0.65647	0.00924738	0.166992	63.26	57.14	18.15	99.54	152.99	85.36	1	1	+	-	-	-	+	-	Su(Tpl)
chr2L	19713184	19713384	201	*	5.25043	4.62126	5.68707	-0.640757	0.00925632	0.166992	29.1	20.11	24.63	61.84	45.48	47.24	1	3	+	-	-	+	+	+	Lar
chr2L	3005595	3005795	201	*	5.64192	5.01597	6.07702	-0.640675	0.00925833	0.166992	41.75	30.69	24.63	63.34	79.59	59.59	0	2	-	-	-	-	+	+	Ccdc85
chr2L	18483845	18484045	201	*	5.73445	4.94144	6.24324	-0.656427	0.00925953	0.166992	32.89	47.62	11.67	72.39	104.4	50.46	2	3	+	+	-	+	+	+	CG10283
chr2R	12884420	12884620	201	*	7.01048	6.12592	7.55482	-0.654698	0.00926602	0.166992	118.93	69.84	20.74	152.33	263.59	148.17	3	3	+	+	+	+	+	+	vg
chr2R	6809691	6809891	201	*	5.49169	4.82507	5.94588	-0.645552	0.00928843	0.166992	32.89	27.51	24.63	75.41	69.26	40.26	1	1	+	-	-	-	-	+	ubl
chr2L	15491268	15491468	201	*	5.74294	5.01778	6.22327	-0.653432	0.00929183	0.166992	51.87	23.28	22.04	73.9	99.24	51	1	1	+	-	-	-	-	+
chr2L	6050732	6050932	201	*	6.1185	5.34718	6.6184	-0.655428	0.00931712	0.166992	56.93	44.45	20.74	105.57	133.35	55.83	1	3	+	-	-	+	+	+	slmo
chr3L	3785324	3785524	201	*	5.3615	4.71198	5.80777	-0.644146	0.00933083	0.166992	35.43	21.16	22.04	55.8	68.22	44.02	0	2	-	-	-	+	+	-	CG32264
chr3R	7031623	7031823	201	*	6.35828	5.66272	6.82559	-0.64984	0.0093323	0.166992	53.14	67.73	31.11	120.66	137.48	82.14	3	3	+	+	+	+	+	+
chr2L	21153954	21154154	201	*	5.44824	4.67315	5.9497	-0.655075	0.00934608	0.166992	27.83	37.04	11.67	55.8	90.97	38.65	1	1	+	-	-	-	-	+	Mpp6
chr2L	3159166	3159366	201	*	5.88568	5.19955	6.34876	-0.649364	0.00934905	0.166992	56.93	33.86	19.44	81.44	86.83	76.23	1	1	+	-	-	-	-	+	Mad
chr3R	8316433	8316633	201	*	5.13441	4.43122	5.60512	-0.649382	0.00935512	0.166992	25.3	26.46	12.96	52.79	59.95	33.28	1	3	+	-	-	+	+	+	Coq2
chrX	19765241	19765441	201	*	5.52366	4.65143	6.06339	-0.654676	0.00935705	0.166992	36.69	29.63	9.07	57.31	111.64	31.67	2	3	+	+	-	+	+	+	CG12702
chr2L	21143063	21143263	201	*	6.37425	5.69841	6.83266	-0.646768	0.00939139	0.167064	46.81	68.78	40.18	131.21	131.28	79.45	3	3	+	+	+	+	+	+	Dap160
chr2R	4543232	4543432	201	*	4.89702	4.21324	5.35903	-0.64754	0.00939183	0.167064	11.39	22.22	22.04	40.72	48.58	33.82	1	1	-	-	+	-	+	-
chr2R	18157890	18158090	201	*	4.93605	4.24679	5.40053	-0.647194	0.00939795	0.167064	15.18	27.51	14.26	43.74	47.55	35.43	2	2	+	+	-	-	+	+	lolal
chr2L	10227167	10227367	201	*	5.43239	4.75929	5.88955	-0.646283	0.00940493	0.167064	27.83	39.15	14.26	57.31	62.02	58.52	3	3	+	+	+	+	+	+	CG5708
chr2L	10379965	10380165	201	*	5.71059	5.03655	6.16819	-0.646172	0.00944163	0.16752	36.69	42.33	19.44	67.87	90.97	56.91	1	1	+	-	-	-	+	-	gny
chr3L	16630593	16630793	201	*	5.10361	4.43773	5.55747	-0.645171	0.00946983	0.167712	17.71	31.75	15.56	39.21	53.75	48.32	3	3	+	+	+	+	+	+	Abl
chr3L	9366839	9367039	201	*	5.90194	5.24169	6.3532	-0.644662	0.00947443	0.167712	53.14	37.04	23.33	81.44	95.1	68.72	2	2	-	+	+	+	-	+	Klp67A
chr2L	10422708	10422908	201	*	5.70269	4.99864	6.17378	-0.649381	0.00950846	0.167848	40.49	35.98	19.44	64.85	102.34	49.39	2	3	+	+	-	+	+	+	pie
chrX	1898898	1899098	201	*	5.2766	4.44122	5.80223	-0.654165	0.00952163	0.167848	25.3	35.98	3.89	60.33	63.06	44.02	3	3	+	+	+	+	+	+	arm
chr2L	14552426	14552626	201	*	5.11254	4.46203	5.55927	-0.64333	0.00952476	0.167848	26.57	20.11	19.44	39.21	63.06	39.19	1	1	+	-	-	-	-	+	FBgn0266147
chr3L	745373	745573	201	*	5.73703	5.02819	6.21024	-0.649892	0.00952723	0.167848	40.49	44.45	12.96	70.88	73.39	77.84	3	3	+	+	+	+	+	+	hng3
chr3R	4348346	4348546	201	*	6.77156	6.01844	7.26386	-0.65287	0.00953719	0.167848	36.69	111.11	46.67	138.75	161.26	161.05	2	3	+	+	-	+	+	+	hkb
chr2L	220571	220771	201	*	5.9962	5.20012	6.50623	-0.653669	0.00957879	0.168054	59.46	39.15	11.67	75.41	117.84	79.45	2	3	+	+	-	+	+	+	FBgn0265151
chr2R	20326742	20326942	201	*	6.1143	5.41868	6.58164	-0.647888	0.00958829	0.168054	53.14	51.85	23.33	96.52	118.88	71.94	2	0	+	+	-	-	-	-	MED8
chr4	307981	308181	201	*	6.5858	5.95131	7.02498	-0.639259	0.00959215	0.168054	59.46	73.02	53.15	134.23	156.09	100.39	2	0	+	+	-	-	-	-	Rad23
chr2R	9110679	9110879	201	*	5.21829	4.42074	5.72892	-0.653139	0.00961068	0.168054	30.36	22.22	11.67	72.39	62.02	24.69	1	1	-	+	-	-	-	+	Pgm2a
chr3L	9624113	9624313	201	*	4.96822	4.30189	5.42228	-0.642737	0.00961266	0.168054	16.45	23.28	19.44	45.25	50.65	32.75	2	1	-	+	+	-	+	-	CG3335
chr2L	8104096	8104296	201	*	4.95545	4.21772	5.4412	-0.650822	0.00962494	0.168054	29.1	13.76	12.96	51.28	51.69	27.38	1	1	-	+	-	-	+	-	Bsg
chr3L	3624882	3625082	201	*	5.99634	5.27225	6.47622	-0.649981	0.00965439	0.168054	54.4	43.39	18.15	90.49	111.64	64.96	3	3	+	+	+	+	+	+	dar1
chrX	5696534	5696734	201	*	4.91653	4.17813	5.40257	-0.650787	0.00966852	0.168054	22.77	21.16	10.37	31.67	64.09	31.14	3	1	+	+	+	-	-	+	CG3149
chr2R	14311697	14311897	201	*	6.11834	5.44254	6.57674	-0.645157	0.00967396	0.168054	46.81	60.32	23.33	87.47	104.4	94.48	2	2	+	+	-	-	+	+	Shrm
chr3L	9429789	9429989	201	*	5.94645	5.30702	6.38797	-0.639106	0.00968274	0.168054	40.49	38.1	40.18	92	102.34	56.91	1	2	-	+	-	-	+	+	RpS17
chr3L	21832144	21832344	201	*	5.5198	4.84343	5.97846	-0.644154	0.00969184	0.168054	31.63	28.57	25.93	69.38	81.66	38.12	2	3	+	+	-	+	+	+	Nopp140
chr2L	6723581	6723781	201	*	5.11936	4.4587	5.57081	-0.642789	0.00969893	0.168054	17.71	27.51	20.74	37.7	64.09	40.8	2	3	+	+	-	+	+	+	homer
chr3R	4849247	4849447	201	*	6.80538	6.18585	7.23739	-0.636018	0.00970715	0.168054	61.99	94.18	62.22	144.79	159.19	148.71	2	3	-	+	+	+	+	+
chr3R	16855954	16856154	201	*	5.81546	5.1005	6.29135	-0.649035	0.00971504	0.168054	53.14	26.46	23.33	76.92	105.44	52.61	2	0	-	+	+	-	-	-	FBgn0020546
chr2R	23943198	23943398	201	*	5.93359	5.24862	6.39614	-0.64549	0.00972985	0.168054	34.16	53.97	25.93	72.39	113.71	66.57	2	3	+	+	-	+	+	+	Galphas
chr3R	14818510	14818710	201	*	5.88999	5.23867	6.3371	-0.641958	0.00975464	0.168054	53.14	38.1	22.04	70.88	86.83	84.82	3	3	+	+	+	+	+	+	btsz
chr2L	12433924	12434124	201	*	6.16899	5.46494	6.64007	-0.647398	0.00975585	0.168054	45.55	57.14	29.81	90.49	141.62	67.11	2	3	+	+	-	+	+	+	eRF3
chr3L	9029385	9029585	201	*	7.13069	6.43452	7.59827	-0.646927	0.00976475	0.168054	69.59	135.45	54.44	187.02	187.1	207.22	1	1	+	-	-	-	-	+
chr4	358909	359109	201	*	5.10225	4.41195	5.5672	-0.644593	0.00978185	0.168054	21.51	30.69	11.67	48.26	54.79	39.19	1	2	+	-	-	-	+	+	Hcf
chr3R	8841085	8841285	201	*	5.81792	5.15016	6.27265	-0.642643	0.00979497	0.168054	44.28	40.21	22.04	79.93	95.1	56.91	3	3	+	+	+	+	+	+	pyd
chr3R	21640332	21640532	201	*	5.9556	5.18847	6.45377	-0.651244	0.00980139	0.168054	63.26	25.4	20.74	72.39	125.08	65.5	1	1	+	-	-	-	-	+	E2f1
chrX	12601179	12601379	201	*	5.37599	4.62121	5.86898	-0.649891	0.00980362	0.168054	22.77	38.1	12.96	61.84	77.53	35.97	2	3	+	+	-	+	+	+	Sec16
chr3R	11786718	11786918	201	*	5.00791	4.30541	5.4783	-0.645892	0.00983598	0.168054	20.24	22.22	16.85	42.23	63.06	28.45	2	2	+	+	-	+	+	-	prd1
chr2L	10226723	10226923	201	*	5.92902	5.2797	6.37519	-0.640223	0.00984456	0.168054	49.34	41.27	25.93	75.41	105.44	68.18	1	3	-	+	-	+	+	+	CG5708
chr3R	28844673	28844873	201	*	5.61683	4.98766	6.05347	-0.636415	0.00984665	0.168054	36.69	33.86	24.63	61.84	83.73	53.68	0	2	-	-	-	+	-	+	Apc
chrX	1948080	1948280	201	*	5.93978	5.19202	6.42981	-0.649552	0.00986232	0.168054	40.49	49.74	19.44	81.44	124.04	53.15	3	3	+	+	+	+	+	+	Hr4
chr2R	6576097	6576297	201	*	5.62262	5.00718	6.05266	-0.636368	0.00986542	0.168054	36.69	33.86	25.93	49.77	66.16	83.21	1	1	+	-	-	-	-	+	jing
chr3R	1815827	1816027	201	*	6.14684	5.55527	6.56517	-0.628482	0.00987514	0.168054	48.08	47.62	45.37	98.03	103.37	82.67	2	0	-	+	+	-	-	-	Myo81F
chr2R	6594353	6594553	201	*	5.50246	4.84931	5.95043	-0.640172	0.00988621	0.168054	36.69	26.46	23.33	60.33	80.63	44.56	2	3	+	+	-	+	+	+	jing
chrX	2269795	2269995	201	*	4.94889	4.16293	5.45482	-0.650553	0.00989966	0.168054	26.57	23.28	3.89	39.21	54.79	37.58	1	2	+	-	-	-	+	+	CG2924
chr2R	18710783	18710983	201	*	5.39937	4.75441	5.84349	-0.637149	0.00992557	0.168054	30.36	28.57	22.04	67.87	63.06	41.34	1	2	+	-	-	+	+	-	Vps51
chrX	15813366	15813566	201	*	5.32032	4.50629	5.83755	-0.65048	0.00993123	0.168054	27.83	33.86	6.48	51.28	82.7	37.58	3	3	+	+	+	+	+	+	sd
chr2R	7479212	7479412	201	*	5.48422	4.88449	5.90658	-0.631797	0.0099447	0.168054	31.63	23.28	33.7	54.29	68.22	57.44	3	3	+	+	+	+	+	+	Aldh-III
chr4	570745	570945	201	*	5.85381	5.14279	6.32797	-0.645731	0.00996024	0.168054	26.57	56.09	23.33	90.49	92	58.52	0	2	-	-	-	-	+	+	ND-49
chr3R	28858235	28858435	201	*	6.53183	5.83837	6.9982	-0.644937	0.00999213	0.168054	83.5	51.85	36.3	128.2	158.16	97.17	3	3	+	+	+	+	+	+	spg
chr3R	1514577	1514777	201	*	5.26454	4.50569	5.75925	-0.648541	0.00999629	0.168054	13.92	41.27	12.96	51.28	67.19	44.02	2	3	+	+	-	+	+	+	Myo81F
chr3L	15517003	15517203	201	*	6.30896	5.51591	6.81776	-0.649842	0.0100005	0.168054	73.38	44.45	19.44	93.51	163.32	81.6	0	2	-	-	-	-	+	+	CG13454
chr2L	2173575	2173775	201	*	5.00649	4.35453	5.45389	-0.638437	0.0100063	0.168054	22.77	24.34	14.26	42.23	51.69	37.58	1	1	-	+	-	-	-	+	aop
chr2L	1886403	1886603	201	*	5.82257	5.12175	6.29222	-0.644713	0.0100085	0.168054	26.57	57.14	20.74	76.92	87.86	70.33	3	3	+	+	+	+	+	+	Wdr62
chr3L	9854673	9854873	201	*	6.2369	5.61282	6.67111	-0.634023	0.0100108	0.168054	48.08	62.44	36.3	113.11	100.27	92.34	1	2	+	-	-	-	+	+	RasGAP1
chr3L	27279152	27279352	201	*	5.15576	4.34581	5.67136	-0.649463	0.0100383	0.168054	22.77	31.75	6.48	61.84	60.99	30.06	2	2	+	+	-	-	+	+	Dbp80
chr4	428356	428556	201	*	5.56798	4.88428	6.02997	-0.643075	0.0100385	0.168054	35.43	40.21	12.96	63.34	67.19	65.5	2	3	+	+	-	+	+	+	FBgn0264794
chr3R	30004559	30004759	201	*	5.88878	5.15833	6.3714	-0.647545	0.0100397	0.168054	59.46	24.34	23.33	84.46	106.47	57.44	0	2	-	-	-	+	+	-	Nlp
chr2L	5270681	5270881	201	*	5.19856	4.58621	5.6271	-0.632957	0.0100422	0.168054	29.1	22.22	20.74	45.25	56.85	46.17	1	1	+	-	-	-	-	+	tkv
chr2L	10264044	10264244	201	*	5.4338	4.7776	5.88317	-0.639416	0.0100451	0.168054	18.98	41.27	22.04	51.28	65.12	60.66	3	3	+	+	+	+	+	+	Rsf1
chr3R	6007455	6007655	201	*	6.86159	6.08741	7.36268	-0.64896	0.0100743	0.168306	108.81	66.67	28.52	165.9	198.47	129.38	2	3	+	+	-	+	+	+	Rm62
chr3R	6991993	6992193	201	*	5.73233	5.04249	6.19709	-0.644308	0.0100874	0.168306	55.67	21.16	22.04	73.9	78.56	67.64	0	3	-	-	-	+	+	+	Antp
chr3L	20295163	20295363	201	*	6.65125	5.94482	7.12339	-0.645203	0.0100949	0.168306	63.26	87.83	33.7	120.66	174.7	122.94	3	3	+	+	+	+	+	+	gogo
chr3R	5094512	5094712	201	*	5.85387	5.14525	6.32698	-0.645273	0.0101043	0.168306	49.34	41.27	15.56	72.39	100.27	68.18	1	2	-	+	-	-	+	+
chr3L	16113210	16113410	201	*	6.65866	5.99056	7.11353	-0.640921	0.0101407	0.168727	77.18	65.61	47.96	122.16	190.2	103.07	1	1	-	+	-	-	-	+	Taf4
chr3R	2856232	2856432	201	*	5.94615	5.32445	6.37921	-0.632773	0.0101532	0.168751	29.1	44.45	46.67	87.47	94.07	68.18	2	3	-	+	+	+	+	+	Pzl
chr2L	20650077	20650277	201	*	5.1814	4.28806	5.72898	-0.645299	0.0101896	0.169025	40.49	11.64	6.48	57.31	74.43	27.38	3	3	+	+	+	+	+	+	CG2611
chrX	7705736	7705936	201	*	5.37396	4.48355	5.92047	-0.6463	0.0101918	0.169025	22.77	39.15	5.19	67.87	82.7	31.14	2	3	+	+	-	+	+	+	CHES-1-like
chr2R	6168319	6168519	201	*	5.48675	4.74442	5.97447	-0.64626	0.0102067	0.169087	24.04	31.75	24.63	60.33	97.17	31.14	1	3	-	+	-	+	+	+	EcR
chr2R	24197691	24197891	201	*	5.64491	4.93941	6.11663	-0.643455	0.0102493	0.169609	39.22	35.98	16.85	66.36	95.1	46.71	2	3	+	+	-	+	+	+	CG3356
chr3L	5360482	5360682	201	*	4.93627	4.253	5.39805	-0.64035	0.0102787	0.16991	20.24	20.11	16.85	42.23	55.82	28.45	2	3	+	+	-	+	+	+	Klp64D
chr2L	14361948	14362148	201	*	5.52132	4.80869	5.9962	-0.64316	0.0103164	0.170161	27.83	38.1	18.15	61.84	89.93	39.73	1	1	+	-	-	-	-	+	spel1
chr2L	9938710	9938910	201	*	5.73131	4.9272	6.24459	-0.646837	0.010344	0.170161	41.75	39.15	10.37	75.41	107.5	44.56	1	3	-	+	-	+	+	+	CG4619
chr2L	10840952	10841152	201	*	5.48899	4.85401	5.9284	-0.634892	0.0103498	0.170161	39.22	30.69	16.85	55.8	64.09	62.81	1	1	+	-	-	-	+	-	CG6700
chr2R	16517113	16517313	201	*	6.41733	5.68221	6.90196	-0.645244	0.0103828	0.170161	80.97	49.74	23.33	99.54	112.67	146.56	2	3	+	+	-	+	+	+	Sema2a
chr3R	16280348	16280548	201	*	6.27702	5.28672	6.85874	-0.635237	0.0103865	0.170161	74.65	35.98	6.48	98.03	180.9	69.25	0	2	-	-	-	-	+	+	gish
chr3R	15280742	15280942	201	*	5.35191	4.53378	5.87077	-0.646384	0.0103872	0.170161	37.96	21.16	10.37	61.84	85.8	27.92	1	2	+	-	-	+	+	-	Tm1
chr2R	19691988	19692188	201	*	5.59124	4.91677	6.04904	-0.639571	0.010389	0.170161	40.49	30.69	19.44	58.82	90.97	48.85	1	2	+	-	-	-	+	+	FBgn0265699
chr3L	15593216	15593416	201	*	5.56164	4.90747	6.01007	-0.636833	0.0103947	0.170161	40.49	27.51	22.04	61.84	83.73	47.78	3	3	+	+	+	+	+	+	RhoGAP71E
chr3L	16710706	16710906	201	*	5.14476	4.51409	5.58212	-0.633323	0.0104007	0.170161	27.83	26.46	14.26	45.25	49.62	48.85	2	3	+	+	-	+	+	+	Dab
chr3R	15094067	15094267	201	*	4.89715	4.09938	5.40788	-0.646281	0.0104055	0.170161	30.36	15.87	5.19	48.26	50.65	28.45	1	2	-	+	-	-	+	+	CG6966
chr3L	3159903	3160103	201	*	5.29422	4.61792	5.75285	-0.638412	0.0104181	0.170185	25.3	32.81	15.56	52.79	69.26	39.73	1	1	-	+	-	-	-	+	rasp
chr3L	4109306	4109506	201	*	5.96723	5.34929	6.39847	-0.630546	0.0104378	0.170277	44.28	50.79	27.22	79.93	89.93	83.21	2	2	+	+	-	+	+	-	Ack
chr3L	4254211	4254411	201	*	6.13129	5.48049	6.57816	-0.63658	0.0104526	0.170277	50.61	44.45	38.89	72.39	137.48	76.77	1	2	-	+	-	-	+	+	CG1265
chrX	12258703	12258903	201	*	5.22844	4.4211	5.74301	-0.645807	0.0104634	0.170277	18.98	34.92	10.37	43.74	85.8	31.14	1	1	-	+	-	+	-	-	Ten-a
chr2R	24743368	24743568	201	*	5.71901	5.06426	6.16771	-0.635547	0.0104685	0.170277	35.43	45.5	19.44	75.41	79.59	60.66	2	0	+	+	-	-	-	-	Usp15-31
chr3R	5517053	5517253	201	*	6.33742	5.65669	6.79806	-0.639062	0.0105856	0.171999	67.05	40.21	44.07	114.62	147.82	71.4	1	1	-	+	-	-	-	+	Itpr
chr3R	5554213	5554413	201	*	5.13191	4.36278	5.63091	-0.643853	0.0106176	0.172335	27.83	22.22	11.67	57.31	67.19	24.16	3	0	+	+	+	-	-	-	Snm1
chr2R	23659502	23659702	201	*	5.34228	4.54283	5.85368	-0.644243	0.0106465	0.172562	34.16	25.4	10.37	61.84	83.73	27.92	3	3	+	+	+	+	+	+	Pde8
chr3L	5806858	5807058	201	*	5.53522	4.90773	5.97106	-0.630346	0.0106542	0.172562	29.1	40.21	20.74	57.31	72.36	58.52	1	1	-	+	-	-	-	+	S6k
chr3L	13513266	13513466	201	*	5.36939	4.64711	5.84847	-0.642014	0.0106808	0.172808	32.89	13.76	28.52	55.8	82.7	34.36	1	2	+	-	-	-	+	+	Liprin-beta
chr2R	6420576	6420776	201	*	5.71219	4.96844	6.20051	-0.642351	0.0107141	0.173082	34.16	45.5	14.26	67.87	103.37	49.39	2	1	-	+	+	+	-	-
chr3L	19913968	19914168	201	*	5.29907	4.62843	5.75511	-0.636323	0.0107204	0.173082	22.77	30.69	20.74	43.74	78.56	39.73	3	1	+	+	+	-	-	+	Rpn1
chr3R	21365456	21365656	201	*	5.92226	5.17751	6.41101	-0.642492	0.0107519	0.173373	58.2	29.63	20.74	75.41	124.04	55.83	1	1	+	-	-	-	+	-	mod(mdg4)
chr2L	4981204	4981404	201	*	5.32115	4.64587	5.77931	-0.635753	0.010772	0.173373	29.1	31.75	14.26	57.31	67.19	40.26	3	2	+	+	+	-	+	+	CG8891
chr2L	21221875	21222075	201	*	5.17467	4.48538	5.63917	-0.638455	0.0107725	0.173373	35.43	20.11	11.67	48.26	60.99	40.26	1	1	+	-	-	-	+	-	CG8677
chr3L	21574393	21574593	201	*	5.87491	5.24163	6.3135	-0.629549	0.0108037	0.173645	32.89	50.79	29.81	90.49	84.76	63.35	3	3	+	+	+	+	+	+	EMC10
chr2L	10332757	10332957	201	*	5.50759	4.88571	5.94074	-0.628969	0.0108122	0.173645	32.89	28.57	27.22	54.29	81.66	48.32	2	3	+	+	-	+	+	+	Schip1
chr2R	17851506	17851706	201	*	5.4652	4.78893	5.92381	-0.63685	0.0108531	0.17409	36.69	30.69	15.56	45.25	83.73	53.15	1	2	+	-	-	-	+	+	olf186-F
chr2R	23554371	23554571	201	*	5.73205	5.07711	6.18084	-0.632921	0.0108628	0.17409	43.02	34.92	23.33	82.95	84.76	49.93	0	2	-	-	-	+	+	-	pita
chr2R	6828208	6828408	201	*	6.92603	6.20102	7.4063	-0.640452	0.010895	0.174424	110.07	61.38	49.26	168.92	231.55	108.44	1	1	-	+	-	-	-	+	CG15236
chr3R	9030158	9030358	201	*	6.22703	5.51788	6.70038	-0.639224	0.0109149	0.174425	44.28	69.84	23.33	78.43	124.04	109.52	1	1	-	+	-	-	+	-	neur
chr3L	23250670	23250870	201	*	5.35051	4.65997	5.81558	-0.635746	0.010918	0.174425	22.77	34.92	18.15	67.87	65.12	35.97	0	3	-	-	-	+	+	+	nAChRalpha4
chr2R	17802469	17802669	201	*	6.32779	5.6863	6.77029	-0.631997	0.0109501	0.174677	69.59	31.75	53.15	120.66	107.5	99.32	1	2	+	-	-	+	+	-	grh
chr3R	24065817	24066017	201	*	5.49668	4.79046	5.96873	-0.638731	0.0109567	0.174677	34.16	19.05	29.81	57.31	94.07	36.51	2	3	+	+	-	+	+	+	eIF4EHP
chr2L	12482509	12482709	201	*	5.76758	5.04329	6.24755	-0.638867	0.011015	0.17538	26.57	52.91	19.44	70.88	103.37	53.68	1	3	-	+	-	+	+	+	bun
chr2R	7485900	7486100	201	*	6.35534	5.60945	6.84457	-0.640431	0.0110297	0.17538	83.5	37.04	25.93	102.56	149.89	92.34	3	3	+	+	+	+	+	+	wech
chr3R	10265705	10265905	201	*	5.42018	4.69397	5.90097	-0.638394	0.0110353	0.17538	20.24	44.45	12.96	66.36	65.12	47.78	1	2	-	+	-	+	+	-	Nuak1
chr2L	5000745	5000945	201	*	7.03975	6.40515	7.47897	-0.629517	0.0110509	0.175445	88.56	104.76	60.92	177.97	216.04	141.19	2	2	+	+	-	+	+	-	Rtnl1
chr3R	6995227	6995427	201	*	5.33848	4.62777	5.81251	-0.63742	0.0110881	0.175698	39.22	23.28	11.67	69.38	57.89	41.34	1	2	+	-	-	+	+	-	Antp
chr2L	1954580	1954780	201	*	6.47833	5.52993	7.04567	-0.632251	0.0110899	0.175698	97.42	24.34	16.85	120.66	200.54	75.16	1	2	+	-	-	+	-	+	erm
chr2L	19703268	19703468	201	*	6.1672	5.51088	6.61663	-0.632529	0.0111135	0.175889	37.96	67.73	31.11	79.93	104.4	110.05	2	3	+	+	-	+	+	+	Lar
chr3L	10677424	10677624	201	*	5.79363	5.09175	6.26375	-0.636976	0.01113	0.175967	13.92	50.79	37.59	67.87	83.73	78.92	1	2	-	+	-	-	+	+	simj
chr3L	1772688	1772888	201	*	6.51093	5.80552	6.98262	-0.637166	0.0111584	0.176233	55.67	83.6	28.52	101.05	145.75	132.6	2	3	-	+	+	+	+	+	Dhc62B
chr2R	10542361	10542561	201	*	5.99559	5.31726	6.45514	-0.634471	0.0112048	0.176783	48.08	50.79	20.74	67.87	112.67	82.67	3	3	+	+	+	+	+	+	FBgn0266628
chr2R	502371	502571	201	*	5.971	6.46062	5.22423	0.638663	0.0112494	0.176893	32.89	106.88	124.44	36.2	35.15	40.8	1	1	-	-	+	-	+	-	DIP-lambda
chr2R	9959685	9959885	201	*	5.10242	4.41662	5.56535	-0.632974	0.0112821	0.176893	22.77	29.63	11.67	49.77	56.85	35.43	1	1	+	-	-	-	-	+	Mef2
chr3L	7435266	7435466	201	*	7.36894	6.46441	7.92062	-0.634035	0.0113072	0.176893	160.68	78.31	25.93	250.36	338.02	138.51	2	2	+	-	+	-	+	+	Rac2
chr3L	19896998	19897198	201	*	6.74277	5.96607	7.2449	-0.638778	0.0113101	0.176893	108.81	47.62	31.11	153.84	193.3	107.91	3	3	+	+	+	+	+	+	Su(Tpl)
chr2L	20120469	20120669	201	*	5.9303	5.13795	6.43883	-0.638703	0.0113197	0.176893	58.2	25.4	22.04	84.46	132.31	43.48	1	3	+	-	-	+	+	+
chr2R	9567218	9567418	201	*	5.239	4.42434	5.75649	-0.638482	0.0113368	0.176893	22.77	33.86	7.78	45.25	85.8	31.14	2	3	+	+	-	+	+	+	Not1
chr3L	7868815	7869015	201	*	5.80998	5.18649	6.2439	-0.624277	0.011343	0.176893	39.22	40.21	29.81	93.51	78.56	55.3	2	2	+	+	-	-	+	+	Pdp1
chr3L	14002903	14003103	201	*	7.1777	6.53601	7.62029	-0.628957	0.0113456	0.176893	113.87	98.42	66.11	182.49	255.32	152.46	2	3	+	+	-	+	+	+	Nprl3
chr3L	2881692	2881892	201	*	7.26023	6.52391	7.74538	-0.637574	0.0113465	0.176893	141.7	94.18	40.18	226.23	239.82	177.7	2	0	+	+	-	-	-	-	Tet
chr3R	8730347	8730547	201	*	5.69411	5.02062	6.15145	-0.631664	0.0113606	0.176893	43.02	34.92	19.44	92	71.33	49.93	3	3	+	+	+	+	+	+	ranshi
chr3R	26030683	26030883	201	*	5.74072	4.91611	6.26214	-0.637679	0.0113924	0.176893	51.87	29.63	9.07	85.97	100.27	44.02	3	3	+	+	+	+	+	+	E(spl)m5-HLH
chrX	15860574	15860774	201	*	4.85134	4.13954	5.32585	-0.635417	0.0113944	0.176893	24.04	15.87	12.96	37.7	56.85	25.77	1	2	-	+	-	-	+	+	Gbeta13F
chr2L	1887005	1887205	201	*	5.03475	4.34005	5.50169	-0.632949	0.0113998	0.176893	24.04	21.16	15.56	54.29	54.79	26.84	3	3	+	+	+	+	+	+	Wdr62
chr2R	19660754	19660954	201	*	6.1895	5.49138	6.65795	-0.634394	0.0114099	0.176893	26.57	65.61	42.78	95.02	134.38	73.55	1	1	+	-	-	-	+	-	CG11018
chr4	978581	978781	201	*	5.37061	4.71269	5.82079	-0.629768	0.0114105	0.176893	17.71	40.21	20.74	49.77	67.19	52.61	1	1	+	-	-	-	-	+	fuss
chr3R	10507949	10508149	201	*	5.22626	4.52376	5.69666	-0.633739	0.0114181	0.176893	17.71	37.04	14.26	51.28	65.12	39.19	3	3	+	+	+	+	+	+	hth
chr2L	9495381	9495581	201	*	5.86486	5.18321	6.32591	-0.633063	0.0114233	0.176893	49.34	40.21	19.44	70.88	107.5	62.27	3	3	+	+	+	+	+	+	Gdi
chr3L	18112837	18113037	201	*	5.48655	4.83718	5.93275	-0.628203	0.0114508	0.176893	17.71	31.75	36.3	67.87	70.29	45.1	2	1	+	+	-	-	+	-	mus304
chr2L	11078421	11078621	201	*	5.35558	4.63655	5.83325	-0.635987	0.0114532	0.176893	24.04	40.21	10.37	40.72	58.92	71.4	3	3	+	+	+	+	+	+	AstC
chr2L	10333581	10333781	201	*	5.95028	5.34495	6.3754	-0.621748	0.0114797	0.176893	50.61	40.21	31.11	78.43	99.24	71.4	0	2	-	-	-	-	+	+	Schip1
chr3L	24723788	24723988	201	*	6.22241	5.45878	6.71911	-0.637249	0.0114853	0.176893	69.59	45.5	16.85	96.52	139.55	79.99	0	3	-	-	-	+	+	+	scro
chr3R	14041023	14041223	201	*	5.17026	4.44551	5.65042	-0.635106	0.0114856	0.176893	22.77	29.63	12.96	48.26	72.36	30.06	1	3	+	-	-	+	+	+
chr3R	16450891	16451091	201	*	5.31315	4.6006	5.78798	-0.634175	0.0114879	0.176893	12.65	38.1	22.04	57.31	69.26	39.19	0	2	-	-	-	-	+	+	Pak3
chr3R	8808787	8808987	201	*	6.02712	5.27109	6.52064	-0.636779	0.0115265	0.176893	58.2	43.39	14.26	78.43	125.08	71.94	1	3	-	+	-	+	+	+	CG9839
chr3R	13404736	13404936	201	*	6.18375	5.54366	6.62558	-0.627289	0.0115279	0.176893	60.73	45.5	33.7	96.52	125.08	74.62	2	0	+	-	+	-	-	-	GILT1
chrX	15857717	15857917	201	*	5.69224	5.01824	6.14982	-0.63065	0.0115295	0.176893	29.1	48.68	19.44	70.88	86.83	55.3	1	2	-	+	-	-	+	+	Gbeta13F
chr2R	15740146	15740346	201	*	5.70041	4.8999	6.21224	-0.636738	0.0115455	0.176893	60.73	15.87	12.96	73.9	87.86	60.66	0	3	-	-	-	+	+	+	CG30089
chr3L	16046790	16046990	201	*	6.41456	5.68998	6.89465	-0.635278	0.011552	0.176893	49.34	78.31	27.22	107.08	160.22	89.65	3	3	+	+	+	+	+	+	Diap1
chrX	20230921	20231121	201	*	5.42614	4.68466	5.91349	-0.635587	0.0115634	0.176893	26.57	40.21	10.37	58.82	79.59	42.41	3	3	+	+	+	+	+	+	sw
chr3R	5125105	5125305	201	*	5.99663	5.35027	6.44141	-0.628292	0.0115676	0.176893	50.61	49.74	22.04	73.9	97.17	89.65	0	2	-	-	-	+	+	-	CG12007
chr4	695250	695450	201	*	5.13201	4.48839	5.57551	-0.626338	0.0115778	0.176893	18.98	32.81	15.56	45.25	52.72	45.1	0	3	-	-	-	+	+	+	ey
chr3R	3148115	3148315	201	*	5.73878	6.17999	5.10002	0.628817	0.0115986	0.176893	58.2	110.06	49.26	39.21	33.08	30.6	1	3	-	-	+	+	+	+	Pzl
chr2R	24869945	24870145	201	*	5.15336	4.49165	5.60529	-0.628037	0.0116239	0.176893	27.83	25.4	14.26	54.29	56.85	34.89	1	1	+	-	-	-	+	-	Atf-2
chr3L	21515763	21515963	201	*	5.44934	4.6642	5.95493	-0.636115	0.0116389	0.176893	12.65	46.56	16.85	69.38	77.53	39.19	2	3	+	+	-	+	+	+	SAK
chrX	9155689	9156068	380	*	5.70213	5.02605	6.16066	-0.630229	0.0116576	0.176893	36.69	45.5	15.56	73.9	81.66	59.05	2	3	+	+	-	+	+	+	His3.3B
chr3L	1178070	1178270	201	*	5.36949	4.63058	5.85575	-0.635202	0.0116647	0.176893	43.02	22.22	9.07	57.31	71.33	45.1	1	1	-	+	-	-	+	-	bab2
chrX	22413941	22414141	201	*	6.28336	6.79245	5.48963	0.63588	0.0116738	0.176893	49.34	198.95	84.26	33.18	51.69	49.93	2	3	+	+	-	+	+	+
chr2L	10413324	10413524	201	*	5.58763	4.93548	6.03512	-0.626645	0.0116749	0.176893	35.43	31.75	24.63	79.93	75.46	41.34	2	3	+	+	-	+	+	+	CG5355
chr2R	15530283	15530483	201	*	5.79776	5.03811	6.2928	-0.635529	0.0116846	0.176893	36.69	47.62	14.26	66.36	117.84	51	2	2	+	+	-	-	+	+	Khc-73
chr3R	16342216	16342416	201	*	5.40231	4.75997	5.84521	-0.625025	0.0116916	0.176893	31.63	32.81	16.85	64.85	63.06	44.56	0	2	-	-	-	+	+	-	pad
chr3R	9258361	9258561	201	*	5.36303	4.66724	5.83045	-0.630692	0.0117057	0.176893	26.57	32.81	16.85	78.43	56.85	35.43	1	3	+	-	-	+	+	+	CG16736
chr3R	14020740	14020940	201	*	5.68196	4.96031	6.16077	-0.63342	0.0117148	0.176893	26.57	48.68	18.15	73.9	95.1	45.63	1	3	-	+	-	+	+	+	rdx
chr4	1112990	1113190	201	*	5.86217	4.99548	6.3998	-0.633158	0.011736	0.176893	54.4	29.63	11.67	99.54	118.88	34.89	2	3	-	+	+	+	+	+	sv
chr2R	5663127	5663327	201	*	6.00785	5.35137	6.45736	-0.627753	0.0117394	0.176893	46.81	49.74	25.93	84.46	114.74	64.42	3	3	+	+	+	+	+	+	Not3
chr3L	1502371	1502571	201	*	5.71248	5.12906	6.12674	-0.615051	0.01174	0.176893	40.49	35.98	28.52	72.39	74.43	62.81	1	1	+	-	-	-	-	+	hfp
chr2L	15742967	15743167	201	*	6.68566	5.96975	7.16197	-0.633498	0.0117458	0.176893	50.61	103.71	33.7	132.72	151.95	144.95	2	3	+	+	-	+	+	+	CycE
chr3L	14031984	14032184	201	*	5.65121	5.01073	6.09322	-0.625	0.0117573	0.176893	36.69	32.81	27.22	72.39	87.86	44.56	3	3	+	+	+	+	+	+	CG6650
chr3R	6994708	6994908	201	*	6.41357	5.7633	6.86019	-0.627373	0.0117851	0.177022	61.99	69.84	31.11	98.03	130.25	120.25	0	3	-	-	-	+	+	+	Antp
chr3R	30313602	30313802	201	*	5.57889	4.90103	6.03823	-0.629883	0.0117951	0.177022	41.75	34.92	12.96	66.36	74.43	56.37	0	2	-	-	-	+	+	-	hdc
chr3L	123929	124129	201	*	5.81605	5.18717	6.25255	-0.624161	0.0118126	0.177022	46.81	39.15	23.33	63.34	96.13	69.25	3	3	+	+	+	+	+	+	FBgn0266951
chr2R	22212771	22212971	201	*	5.77743	5.15642	6.21016	-0.622021	0.0118312	0.177022	40.49	32.81	33.7	73.9	96.13	52.07	2	3	+	+	-	+	+	+	ari-2
chr3R	16097861	16098061	201	*	5.28047	4.63394	5.72533	-0.626671	0.0118398	0.177022	31.63	16.93	25.93	49.77	70.29	38.65	2	3	+	+	-	+	+	+	Akt1
chrX	2354299	2354499	201	*	5.46813	4.6333	5.99355	-0.633911	0.0118405	0.177022	26.57	34.92	12.96	55.8	109.57	25.77	2	1	-	+	+	-	-	+	CG2841
chr3L	1746485	1746685	201	*	6.96165	6.27149	7.42655	-0.630957	0.0118577	0.177022	98.68	94.18	38.89	174.95	201.57	139.58	3	3	+	+	+	+	+	+	CG13921
chr2L	22152687	22152887	201	*	5.45958	4.83792	5.89262	-0.622739	0.0118713	0.177022	20.24	37.04	28.52	45.25	73.39	59.59	1	1	+	-	-	-	+	-	dunk
chr3R	21642382	21642582	201	*	5.81542	5.06046	6.30849	-0.634051	0.0118896	0.177022	56.93	32.81	10.37	75.41	90.97	71.4	1	2	+	-	-	-	+	+	E2f1
chrX	15875644	15875844	201	*	5.44433	4.73234	5.91891	-0.631995	0.0118912	0.177022	26.57	40.21	12.96	45.25	85.8	50.46	3	3	+	+	+	+	+	+
chr2R	4013958	4014158	201	*	6.07974	5.39803	6.54082	-0.629164	0.0119015	0.177022	45.55	55.03	25.93	108.59	110.61	60.13	3	3	+	+	+	+	+	+	Haspin
chr3R	13030853	13031053	201	*	5.50052	4.86246	5.94139	-0.623286	0.0119052	0.177022	22.77	35.98	28.52	63.34	77.53	43.48	1	1	+	-	-	-	-	+	l(3)87Df
chrX	589007	589207	201	*	5.67151	4.97066	6.14117	-0.630655	0.0119601	0.177468	37.96	44.45	11.67	72.39	75.46	63.88	2	0	+	+	-	-	-	-	CG13366
chr2L	18968935	18969135	201	*	5.66977	4.99568	6.12739	-0.628231	0.0119604	0.177468	29.1	38.1	28.52	61.84	104.4	43.48	1	2	-	+	-	-	+	+	Nak
chr3L	8534515	8534715	201	*	4.96989	4.33315	5.41014	-0.622039	0.0119701	0.177468	16.45	23.28	20.74	48.26	45.48	33.82	3	0	+	+	+	-	-	-	ergic53
chr3R	9869178	9869378	201	*	5.30829	4.6414	5.76261	-0.626952	0.0120037	0.177666	20.24	22.22	32.41	60.33	69.26	33.28	2	2	+	-	+	-	+	+	Teh1
chr2L	21178788	21178988	201	*	5.21755	4.57169	5.6621	-0.623181	0.0120157	0.177666	24.04	31.75	15.56	54.29	57.89	39.73	1	3	+	-	-	+	+	+	bur
chr2R	20998700	20998900	201	*	5.27375	4.65573	5.70503	-0.621163	0.0120305	0.177666	32.89	23.28	19.44	45.25	66.16	45.1	2	3	-	+	+	+	+	+	CG10543
chr2L	22578486	22578686	201	*	5.71958	5.00532	6.19516	-0.631144	0.0120392	0.177666	41.75	33.86	20.74	67.87	110.61	41.34	1	1	-	+	-	-	+	-	Slmap
chrX	4679479	4679679	201	*	6.20264	5.51967	6.66429	-0.628807	0.0120418	0.177666	48.08	57.14	32.41	92	146.79	65.5	1	2	+	-	-	-	+	+	fzr
chr3R	7155782	7155982	201	*	5.77334	5.13452	6.21457	-0.622526	0.0121072	0.178437	32.89	46.56	25.93	72.39	95.1	55.3	2	3	+	+	-	+	+	+	MAGE
chr2R	16515511	16515711	201	*	5.89285	5.15181	6.38001	-0.631617	0.0121392	0.178437	32.89	58.2	15.56	75.41	111.64	62.81	1	3	-	+	-	+	+	+	Sema2a
chr3L	15756398	15756598	201	*	5.26838	4.6385	5.70536	-0.621093	0.01214	0.178437	25.3	33.86	15.56	48.26	59.95	48.32	0	2	-	-	-	+	+	-	FBgn0267916
chr3R	14741465	14741665	201	*	5.4986	4.87341	5.93334	-0.619287	0.0121409	0.178437	29.1	38.1	20.74	70.88	63.06	49.39	2	0	+	-	+	-	-	-	eff
chr4	60552	60752	201	*	5.96449	5.33149	6.40296	-0.621708	0.0121608	0.178558	27.83	59.26	33.7	82.95	92	78.92	2	2	+	+	-	+	-	+	FBgn0264617
chr2R	23977803	23978003	201	*	5.46665	4.76991	5.93449	-0.628253	0.0121744	0.178585	22.77	37.04	22.04	64.85	83.73	34.89	3	3	+	+	+	+	+	+	Sox14
chr3L	4263950	4264150	201	*	5.1784	4.53984	5.6195	-0.624506	0.0121963	0.178685	30.36	26.46	12.96	37.7	48.58	61.2	1	1	+	-	-	-	-	+	CG11586
chr3R	26042275	26042475	201	*	6.0093	5.4292	6.42189	-0.612	0.0122099	0.178685	49.34	42.33	37.59	85.97	97.17	74.08	3	3	+	+	+	+	+	+	gro
chr3L	13513002	13513202	201	*	5.03436	4.36641	5.48917	-0.625335	0.0122171	0.178685	21.51	22.22	18.15	43.74	62.02	28.99	2	3	+	+	-	+	+	+	Liprin-beta
chr3R	24233667	24233867	201	*	6.05613	5.37979	6.51477	-0.627092	0.01223	0.178685	53.14	49.74	22.04	81.44	120.94	71.94	3	3	+	+	+	+	+	+	mask
chr3R	18249288	18249488	201	*	5.16004	4.50683	5.60802	-0.624169	0.0122398	0.178685	27.83	22.22	18.15	43.74	68.22	34.36	2	1	-	+	+	-	+	-	14-3-3epsilon
chr2L	13790136	13790336	201	*	4.82628	4.14518	5.28708	-0.626713	0.012255	0.178735	25.3	14.82	12.96	43.74	45.48	27.92	3	3	+	+	+	+	+	+	Eato
chr2R	8098593	8098793	201	*	4.91667	4.24967	5.37104	-0.624207	0.0123037	0.179274	20.24	26.46	10.37	43.74	44.45	35.97	2	3	+	+	-	+	+	+	CG8712
chr2R	5307133	5307333	201	*	5.59327	4.85646	6.07862	-0.629741	0.012327	0.179442	27.83	37.04	22.04	90.49	81.66	30.6	3	3	+	+	+	+	+	+	sxc
chr3R	31223193	31223393	201	*	6.35341	5.72345	6.79043	-0.620848	0.012349	0.179591	60.73	66.67	31.11	104.06	114.74	113.27	3	3	+	+	+	+	+	+	CG12054
chr2L	20085034	20085234	201	*	5.61575	4.95133	6.06893	-0.624697	0.0124102	0.180308	32.89	27.51	32.41	60.33	100.27	40.8	0	2	-	-	-	-	+	+	neb
chr3R	6849952	6850152	201	*	5.57976	4.93038	6.02595	-0.622074	0.0124674	0.180968	44.28	26.46	20.74	76.92	71.33	47.24	1	3	+	-	-	+	+	+	Scr
chr3R	5592065	5592265	201	*	5.68848	5.06352	6.12311	-0.618137	0.0124835	0.181028	27.83	46.56	25.93	66.36	84.76	57.98	3	3	+	+	+	+	+	+	noi
chr3L	18621704	18621904	201	*	5.69198	5.04867	6.13532	-0.621943	0.0125426	0.181713	48.08	20.11	31.11	72.39	83.73	54.76	0	2	-	-	-	+	-	+	not
chr3R	27245196	27245396	201	*	5.93715	5.08511	6.46921	-0.626599	0.0126015	0.18226	69.59	17.99	14.26	101.05	112.67	52.07	0	2	-	-	-	+	+	-	CG18766
chr4	846190	846390	201	*	5.40846	4.68853	5.88652	-0.627328	0.0126043	0.18226	27.83	39.15	10.37	52.79	79.59	45.1	1	3	+	-	-	+	+	+	fd102C
chr2L	1972733	1972933	201	*	7.1422	6.32064	7.66242	-0.627422	0.0126701	0.183038	137.91	77.25	24.63	174.95	260.49	172.33	1	2	+	-	-	+	+	-	erm
chr2R	13158212	13158412	201	*	6.25768	5.51044	6.74749	-0.628001	0.0127001	0.183298	70.85	41.27	24.63	107.08	152.99	62.27	1	2	+	-	-	+	+	-	TppII
chr2R	9446745	9446945	201	*	5.1946	4.57602	5.62615	-0.616702	0.0127257	0.183348	30.36	24.34	16.85	43.74	62.02	42.41	1	1	+	-	-	-	-	+	ced-6
chr4	571650	571850	201	*	5.46086	4.70818	5.95297	-0.627577	0.0127277	0.183348	12.65	47.62	18.15	66.36	75.46	44.02	0	2	-	-	-	-	+	+	ND-49
chr2L	21857827	21858027	201	*	5.22695	4.56107	5.68081	-0.622233	0.0127652	0.183638	36.69	21.16	12.96	57.31	56.85	39.73	0	2	-	-	-	-	+	+	FBgn0266222
chr3R	16798042	16798242	201	*	5.84528	5.15834	6.30872	-0.623884	0.0127719	0.183638	37.96	49.74	19.44	85.97	99.24	52.61	1	1	+	-	-	-	+	-	FBgn0267314
chr3R	23258340	23258540	201	*	6.15238	5.49093	6.6042	-0.621902	0.0128031	0.183913	37.96	64.55	32.41	76.92	133.35	81.6	2	3	+	+	-	+	+	+	wda
chr3L	13922248	13922448	201	*	5.26062	4.6388	5.69374	-0.616896	0.012817	0.18394	35.43	21.16	18.15	49.77	62.02	43.48	2	3	+	+	-	+	+	+	Rgl
chr3L	2388162	2388362	201	*	4.82365	4.18526	5.26468	-0.61765	0.0128541	0.184299	21.51	20.11	12.96	42.23	39.28	33.82	3	3	+	+	+	+	+	+	Mzt1
chr3R	30021926	30022126	201	*	6.70697	5.99735	7.18052	-0.625497	0.0128792	0.184485	98.68	59.26	33.7	143.28	184	107.91	2	3	+	+	-	+	+	+	Axn
chr3R	18188999	18189199	201	*	4.90365	4.18628	5.3806	-0.625489	0.012919	0.184735	25.3	13.76	15.56	36.2	64.09	24.69	0	2	-	-	-	-	+	+	CG12321
chr3L	20520928	20521128	201	*	5.14693	4.51497	5.5849	-0.615566	0.0129209	0.184735	16.45	27.51	24.63	55.8	51.69	36.51	3	3	+	+	+	+	+	+	CG5059
chr2R	9278913	9279113	201	*	5.96258	5.19331	6.46164	-0.626532	0.0129392	0.184823	56.93	35.98	16.85	88.98	128.18	47.24	3	3	+	+	+	+	+	+	Pkn
chr3R	8308563	8308763	201	*	5.66706	4.96255	6.13836	-0.623989	0.0129651	0.18502	30.36	47.62	15.56	67.87	94.07	49.39	1	2	-	+	-	+	+	-	tex
chr2L	1422153	1422353	201	*	6.61475	5.91815	7.08253	-0.623856	0.0130086	0.185466	77.18	78.31	25.93	129.7	141.62	135.29	1	3	+	-	-	+	+	+	robo2
chr3R	5404041	5404241	201	*	5.32447	4.61564	5.79766	-0.623615	0.013043	0.185663	35.43	26.46	11.67	66.36	66.16	34.36	2	1	-	+	+	-	-	+	CG2663
chr2L	9996895	9997095	201	*	5.4003	4.63193	5.89897	-0.625712	0.0130554	0.185663	45.55	15.87	12.96	58.82	84.76	35.43	1	3	+	-	-	+	+	+	SoYb
chr2R	24877726	24877926	201	*	5.09435	4.4702	5.52859	-0.615919	0.0130589	0.185663	25.3	24.34	16.85	36.2	62.02	40.26	3	3	+	+	+	+	+	+	CG16896
chr2R	17545042	17545242	201	*	5.89919	5.2386	6.3506	-0.618982	0.0131103	0.18622	32.89	51.85	28.52	93.51	99.24	52.07	2	0	-	+	+	-	-	-	cyp33
chr2L	21263612	21263812	201	*	6.13037	5.49723	6.56891	-0.615726	0.0131588	0.186735	43.02	61.38	31.11	96.52	114.74	73.55	1	3	+	-	-	+	+	+	CG8671
chr2L	18364406	18364606	201	*	5.56932	4.92593	6.01271	-0.617736	0.0131818	0.186887	41.75	22.22	27.22	63.34	85.8	44.56	3	3	+	+	+	+	+	+	Fas3
chr3R	24719897	24720097	201	*	5.89828	5.26596	6.33643	-0.615386	0.0132309	0.18736	40.49	52.91	22.04	76.92	93.03	72.47	1	3	-	+	-	+	+	+	tok
chr2L	21633268	21633468	201	*	6.35902	5.64851	6.83296	-0.622959	0.0132398	0.18736	55.67	74.08	20.74	116.13	128.18	97.71	2	3	+	+	-	+	+	+	Ac3
chr2L	18604876	18605076	201	*	5.39929	4.76446	5.83863	-0.616369	0.0132649	0.187436	41.75	19.05	20.74	58.82	66.16	46.71	1	1	-	+	-	+	-	-	CG10413
chr3R	13012249	13012449	201	*	6.60144	5.98002	7.03437	-0.613969	0.0132697	0.187436	80.97	65.61	42.78	143.28	143.68	106.3	1	1	+	-	-	-	-	+	CtBP
chr3L	15826340	15826540	201	*	5.80713	5.10533	6.27722	-0.621727	0.0132982	0.187442	31.63	56.09	15.56	79.93	89.93	62.81	0	2	-	-	-	+	-	+	DCP2
chr2R	17683091	17683291	201	*	6.16546	5.46606	6.63448	-0.621992	0.0133184	0.187442	60.73	55.03	16.85	96.52	105.44	96.1	3	3	+	+	+	+	+	+	Sema1b
chr3R	16833076	16833276	201	*	5.98112	5.27424	6.45347	-0.62256	0.0133191	0.187442	68.32	29.63	18.15	95.02	86.83	81.06	3	3	+	+	+	+	+	+	FBgn0264857
chrY	2609684	2609884	201	*	6.51854	5.88893	6.95539	-0.615363	0.0133218	0.187442	65.79	38.1	73.89	140.26	135.41	96.63	0	2	-	-	-	+	+	-
chr2L	21251859	21252059	201	*	4.83627	4.17365	5.28862	-0.61832	0.0133316	0.187442	25.3	15.87	12.96	40.72	47.55	28.99	2	2	+	+	-	+	+	-	Hr39
chr3L	21146061	21146261	201	*	6.84876	6.17758	7.30505	-0.61985	0.0133448	0.187454	63.26	111.11	42.78	134.23	157.12	183.06	1	2	+	-	-	-	+	+	Ac78C
chr3R	13294258	13294458	201	*	5.31299	4.66827	5.75701	-0.615797	0.0133624	0.187529	18.98	39.15	18.15	48.26	65.12	48.85	3	3	+	+	+	+	+	+	wntD
chr3R	29074214	29074414	201	*	6.87583	6.21151	7.32897	-0.618476	0.0134349	0.188372	89.83	91.01	41.48	159.87	198.47	124.01	2	3	+	+	-	+	+	+	CG11873
chr4	1113405	1113605	201	*	5.13549	4.4418	5.60197	-0.620181	0.0134763	0.188456	25.3	24.34	15.56	40.72	75.46	29.53	3	3	+	+	+	+	+	+	Cals
chr2L	1117528	1117728	201	*	5.74041	5.13735	6.16441	-0.608708	0.0134838	0.188456	34.16	45.5	25.93	72.39	83.73	59.05	0	2	-	-	-	-	+	+	Pino
chr2L	21864294	21864494	201	*	4.89855	4.14953	5.38911	-0.621946	0.0135154	0.188456	17.71	26.46	9.07	45.25	56.85	23.62	0	3	-	-	-	+	+	+	FBgn0266222
chr3L	9854161	9854361	201	*	6.35421	5.72791	6.78948	-0.613581	0.0135265	0.188456	70.85	51.85	36.3	101.05	139.55	91.26	2	3	+	+	-	+	+	+	RasGAP1
chr2R	11284295	11284495	201	*	4.97865	4.34789	5.41605	-0.612817	0.0135285	0.188456	20.24	20.11	20.74	43.74	53.75	30.6	2	3	+	+	-	+	+	+	CG9062
chr2L	22121051	22121251	201	*	6.49624	5.86914	6.9319	-0.613049	0.0135378	0.188456	55.67	73.02	46.67	122.16	156.09	88.04	1	1	+	-	-	-	-	+	CG3651
chr3L	20516554	20516754	201	*	5.24688	4.66817	5.65878	-0.605594	0.0135495	0.188456	20.24	27.51	28.52	51.28	44.45	55.83	2	3	+	+	-	+	+	+	CG5059
chr2R	22937394	22937594	201	*	5.31887	4.671	5.76436	-0.61485	0.0135503	0.188456	22.77	38.1	15.56	51.28	66.16	45.63	0	2	-	-	-	+	+	-	CNBP
chr2R	12450090	12450290	201	*	5.38762	4.7372	5.8343	-0.614966	0.0135596	0.188456	25.3	39.15	15.56	57.31	68.22	45.63	2	3	+	+	-	+	+	+	Lac
chr3R	6753640	6753840	201	*	5.6298	5.04453	6.04499	-0.607439	0.0135723	0.188456	39.22	33.86	25.93	49.77	79.59	68.72	1	1	-	+	-	-	+	-	zen
chrX	8046610	8046810	201	*	5.37736	4.65746	5.85541	-0.620426	0.0135867	0.188456	22.77	41.27	11.67	69.38	65.12	39.19	3	3	+	+	+	+	+	+	fs(1)h
chr2L	11224925	11225125	201	*	5.08179	4.42892	5.52962	-0.617156	0.0136195	0.188456	10.12	28.57	25.93	39.21	40.31	59.05	3	3	+	+	+	+	+	+	ab
chr3R	16745388	16745588	201	*	5.23475	4.56671	5.68961	-0.616506	0.0136212	0.188456	18.98	39.15	12.96	54.29	51.69	48.85	1	1	+	-	-	-	-	+	FBgn0020556
chr2R	11455753	11455953	201	*	6.45197	5.78927	6.90436	-0.617086	0.0136343	0.188456	55.67	80.43	29.81	107.08	139.55	112.74	2	3	+	+	-	+	+	+	E(Pc)
chr3L	11609608	11609808	201	*	5.12492	4.42955	5.59214	-0.618003	0.0136703	0.188456	24.04	21.16	19.44	72.39	45.48	26.84	1	2	+	-	-	-	+	+	Duba
chr2R	6515062	6515262	201	*	5.27346	4.65849	5.70326	-0.61082	0.0136819	0.188456	36.69	22.22	16.85	52.79	57.89	45.63	1	2	+	-	-	-	+	+	jing
chr2L	20752412	20752612	201	*	4.87908	4.19698	5.34034	-0.617101	0.0136913	0.188456	22.77	17.99	14.26	48.26	48.58	24.69	2	1	+	-	+	-	+	-	Amacr
chr2R	13223728	13223928	201	*	6.80553	6.11743	7.2695	-0.619036	0.0136927	0.188456	107.54	59.26	41.48	158.36	191.23	113.27	0	2	-	-	-	-	+	+	Dp
chr2R	3500645	3500845	201	*	6.31089	5.70908	6.73427	-0.608503	0.0136929	0.188456	34.16	59.26	63.52	110.1	112.67	96.63	2	2	+	+	-	-	+	+
chrX	5885683	5885883	201	*	5.33255	4.50547	5.85494	-0.620256	0.0136973	0.188456	24.04	40.21	3.89	55.8	76.49	41.34	3	1	+	+	+	-	-	+	FBgn0267228
chr2L	19457947	19458147	201	*	5.56372	4.91665	6.00884	-0.614162	0.0137005	0.188456	35.43	37.04	18.15	64.85	82.7	45.63	2	3	+	+	-	+	+	+
chrX	11580129	11580329	201	*	4.88729	4.20544	5.34843	-0.61653	0.0137616	0.188717	13.92	23.28	18.15	43.74	52.72	25.77	2	3	+	+	-	+	+	+	nod
chr3L	22400858	22401058	201	*	5.88072	5.16716	6.356	-0.620007	0.0137669	0.188717	60.73	32.81	14.26	70.88	101.3	73.55	2	3	+	+	-	+	+	+	Ten-m
chr3R	15264071	15264271	201	*	5.05662	4.45093	5.48191	-0.610106	0.0137812	0.188717	27.83	22.22	15.56	34.69	53.75	45.63	1	3	+	-	-	+	+	+	Set
chr2R	17478354	17478554	201	*	5.27094	4.58528	5.73381	-0.617198	0.0137963	0.188717	20.24	34.92	16.85	48.26	76.49	34.89	3	3	+	+	+	+	+	+	insb
chr3L	22288075	22288275	201	*	5.79677	5.17224	6.23119	-0.611791	0.0138116	0.188717	50.61	26.46	31.11	73.9	95.1	56.37	1	2	-	+	-	-	+	+	Hem
chr2R	17813969	17814169	201	*	6.25105	5.58725	6.70395	-0.616153	0.0138131	0.188717	51.87	67.73	24.63	88.98	127.15	96.63	3	3	+	+	+	+	+	+	grh
chrX	576380	576580	201	*	5.07961	4.37279	5.55192	-0.618491	0.0138228	0.188717	18.98	32.81	10.37	40.72	65.12	34.89	1	1	+	-	-	-	+	-	Appl
chr3L	6129693	6129893	201	*	5.00648	4.27836	5.4881	-0.619416	0.0138526	0.188717	17.71	15.87	24.63	54.29	59.95	20.4	2	2	+	+	-	-	+	+	l(3)mbn
chr2L	21847615	21847815	201	*	6.01251	5.34963	6.46499	-0.615742	0.0138791	0.188717	58.2	43.39	20.74	81.44	111.64	71.94	3	3	+	+	+	+	+	+
chr3R	15242160	15242360	201	*	5.42462	4.7735	5.87163	-0.614579	0.0138811	0.188717	39.22	28.57	14.26	49.77	76.49	49.39	2	2	+	+	-	-	+	+	tefu
chr3R	2858556	2858756	201	*	5.09936	4.40761	5.56497	-0.617059	0.0138839	0.188717	30.36	19.05	14.26	58.82	55.82	27.38	2	3	-	+	+	+	+	+	Pzl
chr4	245232	245432	201	*	5.38952	4.62928	5.88481	-0.619952	0.0138878	0.188717	25.3	35.98	12.96	57.31	90.97	28.99	1	1	-	+	-	+	-	-	CG1674
chr2L	11971147	11971347	201	*	7.18942	6.43805	7.68098	-0.619902	0.0139022	0.188717	134.11	91.01	35	196.06	269.8	149.78	2	1	+	+	-	-	+	-	FBgn0263019
chr3L	16004153	16004353	201	*	5.38927	4.81268	5.8001	-0.602468	0.0139086	0.188717	29.1	25.4	29.81	54.29	66.16	46.71	1	2	+	-	-	-	+	+	hzg
chr2L	10220809	10221009	201	*	6.07814	5.36233	6.55441	-0.618877	0.0139176	0.188717	51.87	50.79	20.74	85.97	137.48	58.52	1	3	-	+	-	+	+	+	Npc1a
chr3R	19778148	19778348	201	*	5.51212	4.86606	5.95676	-0.613413	0.0139176	0.188717	13.92	35.98	37.59	60.33	73.39	52.61	1	1	+	-	-	-	-	+	CG11659
chr2R	6605975	6606175	201	*	6.66607	5.9627	7.13685	-0.618316	0.0139524	0.188899	91.09	68.78	27.22	129.7	168.49	124.01	1	1	+	-	-	-	+	-	jing
chr3L	23597000	23597200	201	*	5.83071	6.32155	5.08102	0.619484	0.0139588	0.188899	39.22	144.98	55.74	25.64	36.18	39.73	1	1	+	-	-	-	+	-	AGO3
chr2L	271671	271871	201	*	5.37278	4.69599	5.83164	-0.616635	0.0139694	0.188899	26.57	31.75	19.44	33.18	90.97	46.71	1	1	-	+	-	-	+	-	CG3645
chrX	21358192	21358392	201	*	5.54131	4.89453	5.98629	-0.611859	0.0139895	0.188899	29.1	38.1	22.04	72.39	77.53	40.26	1	3	-	+	-	+	+	+	2021-09-01
chr3R	24258431	24258631	201	*	5.67797	5.05198	6.1131	-0.60987	0.0140464	0.188899	36.69	43.39	19.44	63.34	85.8	58.52	1	2	+	-	-	+	+	-	jar
chr2R	7453996	7454196	201	*	5.50458	4.60007	6.05625	-0.612518	0.014076	0.188899	34.16	24.34	14.26	87.47	98.2	13.96	3	3	+	+	+	+	+	+	fa2h
chr2R	6125614	6125814	201	*	4.94301	4.2645	5.40264	-0.614453	0.0140819	0.188899	25.3	23.28	9.07	51.28	43.42	32.21	1	2	-	+	-	-	+	+	EcR
chrX	8560833	8561033	201	*	5.96812	5.21324	6.46115	-0.618564	0.0141031	0.188899	30.36	66.67	14.26	75.41	112.67	76.23	2	2	+	+	-	+	+	-	IntS4
chrX	15859985	15860185	201	*	5.37475	4.67227	5.84514	-0.617021	0.0141077	0.188899	40.49	24.34	11.67	57.31	76.49	38.65	1	3	-	+	-	+	+	+	Gbeta13F
chr4	1181928	1182128	201	*	6.06977	5.40265	6.52419	-0.614165	0.0141102	0.188899	43.02	59.26	24.63	98.03	114.74	63.35	2	3	+	+	-	+	+	+	pho
chr2L	10226272	10226472	201	*	6.12857	5.5013	6.56431	-0.610053	0.0141167	0.188899	46.81	59.26	29.81	81.44	123.01	79.45	1	1	+	-	-	-	-	+	CG5708
chr2L	14026900	14027100	201	*	5.05946	4.44099	5.49097	-0.609541	0.0141236	0.188899	27.83	12.7	24.63	51.28	44.45	39.19	1	1	+	-	-	+	-	-	FBgn0051840
chr2R	6712248	6712448	201	*	5.32931	4.55293	5.8313	-0.617998	0.0141604	0.188899	44.28	10.58	15.56	54.29	82.7	33.82	0	2	-	-	-	-	+	+	chk
chr2R	8248070	8248270	201	*	6.51367	5.79013	6.9933	-0.617711	0.0141612	0.188899	50.61	92.07	23.33	114.62	132.31	135.29	0	2	-	-	-	+	+	-
chr2R	6515771	6515971	201	*	6.22882	5.41258	6.74694	-0.616886	0.0141685	0.188899	70.85	46.56	10.37	111.61	134.38	76.23	2	3	+	+	-	+	+	+	jing
chr3L	8664598	8664798	201	*	5.61082	5.02204	6.02776	-0.604699	0.0141688	0.188899	24.04	42.33	31.11	54.29	63.06	78.38	2	3	+	+	-	+	+	+
chr3R	29151944	29152144	201	*	5.91607	5.23573	6.37652	-0.615563	0.0141715	0.188899	36.69	58.2	18.15	60.33	98.2	90.73	1	1	-	-	+	-	+	-	Rpn2
chr2L	21878966	21879166	201	*	5.66484	5.05841	6.09049	-0.606792	0.0141738	0.188899	37.96	41.27	20.74	57.31	82.7	64.42	1	3	+	-	-	+	+	+
chr2L	2577850	2578050	201	*	7.05136	6.3788	7.50828	-0.614821	0.0141755	0.188899	67.05	133.34	49.26	176.46	198.47	171.25	2	1	-	+	+	-	+	-	Rad1
chrY	2678590	2678790	201	*	5.31703	4.7277	5.73425	-0.603054	0.0141789	0.188899	24.04	24.34	31.11	55.8	62.02	41.87	1	1	-	+	-	-	+	-
chr2R	13953601	13953801	201	*	6.00177	5.3204	6.46269	-0.615523	0.0142001	0.188988	63.26	30.69	25.93	82.95	119.91	61.74	3	3	+	+	+	+	+	+	mRpL53
chr3L	9476900	9477100	201	*	6.02456	5.35802	6.47872	-0.61419	0.0142196	0.188988	58.2	40.21	24.63	75.41	126.11	66.03	1	1	-	+	-	-	-	+	Uch-L5
chrX	11199363	11199563	201	*	5.07159	5.5844	4.26864	0.617232	0.0142228	0.188988	13.92	84.66	45.37	16.59	16.54	24.69	2	3	+	+	-	+	+	+	CG11106
chrX	8775112	8775312	201	*	5.26687	4.47361	5.77576	-0.617333	0.0142575	0.189285	32.89	28.57	5.19	60.33	72.36	31.67	2	3	+	+	-	+	+	+	Lim1
chr3R	27152137	27152337	201	*	5.29763	4.66724	5.73486	-0.608159	0.0143445	0.189473	26.57	32.81	16.85	51.28	68.22	40.26	3	3	+	+	+	+	+	+	Men-b
chr2L	16787648	16787848	201	*	6.19073	5.51564	6.6488	-0.614061	0.0143449	0.189473	65.79	33.86	37.59	108.59	132.31	60.13	2	3	+	+	-	+	+	+	Mhc
chrX	2334137	2334337	201	*	5.21515	4.39796	5.73364	-0.615679	0.0143777	0.189473	37.96	20.11	5.19	58.82	72.36	28.45	1	3	-	+	-	+	+	+	Raf
chr3R	13645410	13645610	201	*	6.06538	5.48138	6.47994	-0.601843	0.0143902	0.189473	56.93	43.39	33.7	84.46	104.4	78.92	0	3	-	-	-	+	+	+	rin
chr3R	15263109	15263309	201	*	5.58341	4.95341	6.02045	-0.608759	0.0144232	0.189473	46.81	25.4	20.74	70.88	73.39	50.46	1	3	-	+	-	+	+	+	Set
chr3L	19043765	19043965	201	*	6.18147	5.51513	6.63554	-0.61285	0.0144233	0.189473	50.61	64.55	22.04	84.46	120.94	92.87	0	2	-	-	-	+	+	-	nkd
chr3L	17555977	17556177	201	*	6.24827	5.35521	6.79574	-0.610509	0.0144292	0.189473	30.36	84.66	7.78	117.64	114.74	100.93	1	2	-	+	-	+	+	-	CycT
chr3R	14739203	14739403	201	*	5.85649	5.22306	6.29517	-0.610266	0.0144375	0.189473	60.73	25.4	25.93	76.92	75.46	83.21	2	0	+	+	-	-	-	-	eff
chrX	14896809	14897009	201	*	5.33643	5.80429	4.63962	0.61504	0.0144467	0.189473	36.69	92.07	38.89	16.59	36.18	22.01	3	3	+	+	+	+	+	+	CG9514
chr3L	8338949	8339149	201	*	5.10845	4.32851	5.61191	-0.616341	0.0144493	0.189473	18.98	29.63	11.67	66.36	59.95	20.4	3	3	+	+	+	+	+	+	DNApol-alpha50
chr4	904775	904975	201	*	5.18917	4.52565	5.64194	-0.611352	0.0144501	0.189473	29.1	29.63	10.37	54.29	56.85	38.65	2	3	+	+	-	+	+	+	unc-13
chr3R	32052514	32052714	201	*	5.9518	5.32935	6.38523	-0.60705	0.0144513	0.189473	40.49	52.91	27.22	81.44	105.44	63.88	2	3	+	+	-	+	+	+	mod
chr3L	22066822	22067022	201	*	6.37779	5.63107	6.86738	-0.616272	0.0144533	0.189473	36.69	89.95	22.04	101.05	135.41	113.81	3	3	+	+	+	+	+	+	CG14561
chr3L	6976067	6976267	201	*	5.75011	5.09029	6.20116	-0.61166	0.0144778	0.189473	27.83	49.74	24.63	57.31	105.44	57.98	2	3	+	+	-	+	+	+	Galphai
chr2R	23933665	23933865	201	*	5.12157	4.36005	5.61739	-0.615903	0.0145135	0.189473	37.96	15.87	7.78	43.74	71.33	32.21	2	3	+	+	-	+	+	+	SERCA
chr4	1097713	1097913	201	*	5.66049	5.03161	6.097	-0.607604	0.0145171	0.189473	41.75	31.75	24.63	72.39	87.86	45.1	3	3	+	+	+	+	+	+	sv
chr3R	16469570	16469770	201	*	5.67431	5.0746	6.09666	-0.603177	0.0145399	0.189473	40.49	35.98	24.63	66.36	85.8	53.15	1	1	+	-	-	+	-	-	CSN5
chr3L	593094	593294	201	*	6.19233	5.6199	6.60107	-0.598108	0.0145449	0.189473	53.14	52.91	41.48	98.03	112.67	80.53	0	3	-	-	-	+	+	+	MED14
chr3R	23130315	23130515	201	*	5.42142	4.82989	5.83972	-0.60196	0.0145493	0.189473	20.24	39.15	25.93	54.29	56.85	60.66	3	2	+	+	+	-	+	+	hh
chr2R	13924151	13924351	201	*	5.25209	4.5076	5.74073	-0.61541	0.0145586	0.189473	25.3	33.86	9.07	52.79	76.49	31.14	3	3	+	+	+	+	+	+	shot
chr2R	20611335	20611535	201	*	4.92738	4.31319	5.35681	-0.606423	0.0145716	0.189473	26.57	20.11	12.96	36.2	47.55	39.19	2	2	+	+	-	-	+	+	Hil
chrX	1235000	1235200	201	*	5.83652	5.13406	6.3069	-0.614165	0.0145864	0.189473	49.34	39.15	16.85	75.41	111.64	50.46	3	3	+	+	+	+	+	+	CG3638
chrX	10822200	10822400	201	*	6.15562	5.41944	6.64071	-0.61517	0.0146037	0.189473	49.34	63.49	15.56	95.02	130.25	74.08	3	3	+	+	+	+	+	+	FBgn0267184
chr2R	16405457	16405657	201	*	4.92269	5.35793	4.29646	0.609762	0.0146067	0.189473	53.14	46.56	23.33	19.61	23.78	15.57	0	2	-	-	-	-	+	+	Sema2b
chr2L	7783000	7783200	201	*	5.18774	4.55564	5.62579	-0.606303	0.0146142	0.189473	22.77	29.63	18.15	52.79	60.99	34.36	1	2	-	+	-	-	+	+	CG7154
chr3R	30465854	30466054	201	*	6.15468	5.32183	6.67932	-0.613046	0.0146182	0.189473	67.05	41.27	11.67	110.1	143.68	53.68	1	2	+	-	-	-	+	+	PH4alphaEFB
chr3R	14819672	14819872	201	*	6.12094	5.48819	6.55929	-0.60848	0.0146183	0.189473	64.52	45.5	24.63	88.98	107.5	86.43	1	2	-	+	-	-	+	+	btsz
chr3L	19583517	19583717	201	*	4.97485	4.38701	5.39132	-0.601993	0.0146198	0.189473	24.04	17.99	20.74	39.21	48.58	38.12	1	2	+	-	-	+	+	-	Shal
chrX	12601526	12601726	201	*	5.35763	4.66258	5.82472	-0.612409	0.0146492	0.189693	21.51	40.21	14.26	67.87	65.12	37.04	2	3	+	+	-	+	+	+	Sec16
chr2R	13555816	13556016	201	*	6.56512	5.85298	7.03978	-0.61416	0.0146744	0.189858	61.99	86.77	24.63	117.64	164.36	112.74	2	3	+	+	-	+	+	+	link
chr2R	5653534	5653734	201	*	5.76915	5.13367	6.2088	-0.606959	0.0147088	0.190142	35.43	46.56	23.33	79.93	90.97	51	0	2	-	-	-	-	+	+	CG1344
chr2L	4282087	4282287	201	*	6.35754	5.60804	6.84831	-0.614515	0.0147347	0.190315	36.69	88.89	20.74	95.02	126.11	124.55	1	3	+	-	-	+	+	+	tutl
chr2R	21713991	21714191	201	*	6.09725	5.41019	6.56075	-0.6122	0.0147749	0.190651	49.34	61.38	16.85	95.02	103.37	84.82	1	3	+	-	-	+	+	+	HmgD
chrX	18795957	18796157	201	*	6.04063	5.33835	6.51093	-0.613062	0.0147858	0.190651	58.2	47.62	15.56	88.98	112.67	71.94	2	3	+	+	-	+	+	+	bnb
chr3R	8858432	8858632	201	*	5.867	5.13944	6.34837	-0.613782	0.0148153	0.190826	21.51	63.49	20.74	52.79	97.17	94.48	0	2	-	-	-	+	+	-	pyd
chr2L	870726	870926	201	*	5.49303	4.90453	5.90983	-0.598756	0.0148243	0.190826	32.89	34.92	22.04	72.39	53.75	54.22	0	3	-	-	-	+	+	+	dbe
chr2R	11852494	11852694	201	*	5.61231	4.95105	6.06404	-0.609883	0.0148627	0.190863	37.96	32.81	22.04	52.79	103.37	44.56	1	2	-	+	-	-	+	+	Mtor
chr3L	2879117	2879317	201	*	6.70715	6.03581	7.16351	-0.610942	0.0148658	0.190863	93.62	65.61	37.59	126.69	192.27	111.13	1	3	+	-	-	+	+	+	Tet
chr3R	8857721	8857921	201	*	7.21137	6.61574	7.63172	-0.60141	0.0149105	0.190863	121.46	107.94	64.81	196.06	221.21	177.7	1	2	+	-	-	+	+	-	pyd
chrX	4946565	4946765	201	*	5.10761	4.31764	5.61517	-0.613262	0.0149133	0.190863	12.65	38.1	9.07	48.26	69.26	29.53	1	1	-	+	-	-	+	-	Ptp4E
chr2R	18134547	18134747	201	*	6.20602	5.5912	6.63576	-0.603898	0.0149178	0.190863	51.87	48.68	44.07	101.05	132.31	64.96	1	1	+	-	-	-	+	-	Hsf
chr3L	5823901	5824101	201	*	6.08045	5.35532	6.56077	-0.612987	0.014936	0.190863	63.26	34.92	24.63	88.98	141.62	52.61	2	2	+	+	-	+	+	-	vn
chr3L	17650266	17650466	201	*	6.76659	6.15904	7.19279	-0.603031	0.014944	0.190863	61.99	100.53	51.85	147.8	135.41	155.69	1	2	+	-	-	+	+	-	Ndfip
chr2L	20093762	20093962	201	*	5.40124	4.69881	5.87161	-0.611868	0.0149461	0.190863	35.43	24.34	18.15	60.33	85.8	29.53	2	3	+	+	-	+	+	+	CG10747
chr2R	16924801	16925001	201	*	5.54611	4.82032	6.02672	-0.6128	0.0149571	0.190863	44.28	27.51	12.96	61.84	95.1	38.65	2	0	+	+	-	-	-	-	Pkc53E
chr2R	18532327	18532527	201	*	5.96701	5.36683	6.3896	-0.6018	0.0149923	0.190863	40.49	56.09	27.22	69.38	93.03	89.12	3	3	+	+	+	+	+	+	Pepck2
chr3R	7981488	7981688	201	*	5.56243	4.92994	6.00065	-0.604536	0.0150367	0.190863	30.36	33.86	27.22	75.41	78.56	38.12	0	3	-	-	-	+	+	+	Sfp84E
chr3R	8190934	8191134	201	*	6.82471	6.086	7.31089	-0.612484	0.0150544	0.190863	112.6	61.38	29.81	173.44	191.23	111.66	3	3	+	+	+	+	+	+
chrX	2326127	2326327	201	*	4.87404	4.18506	5.3384	-0.609696	0.0150599	0.190863	16.45	26.46	11.67	39.21	54.79	27.38	2	3	+	+	-	+	+	+	Raf
chr2L	22145855	22146055	201	*	5.61312	4.98239	6.05051	-0.606169	0.0150719	0.190863	51.87	22.22	20.74	69.38	67.19	62.27	3	3	+	+	+	+	+	+	CG42748
chr3R	6709770	6709970	201	*	6.10152	5.39687	6.57287	-0.61145	0.0150809	0.190863	65.79	35.98	24.63	101.05	128.18	56.37	0	2	-	-	-	+	+	-	pb
chr3R	19889977	19890177	201	*	5.26609	5.67371	4.69584	0.595892	0.0150819	0.190863	60.73	44.45	47.96	22.62	32.04	23.08	3	3	+	+	+	+	+	+	ninaE
chr3L	14051082	14051282	201	*	6.03342	5.33709	6.50108	-0.611157	0.0150834	0.190863	58.2	42.33	20.74	72.39	134.38	64.96	2	2	+	+	-	+	+	-	CG6833
chrX	13329722	13329922	201	*	5.1934	5.68623	4.43901	0.611976	0.0150946	0.190863	50.61	85.72	18.15	19.61	32.04	13.42	2	1	+	+	-	-	+	-	Jafrac1
chr4	662799	662999	201	*	5.49287	4.85543	5.93345	-0.606501	0.0150975	0.190863	30.36	37.04	19.44	40.72	87.86	54.76	2	2	+	+	-	-	+	+	Slip1
chr2L	414964	415164	201	*	5.34434	4.69426	5.79087	-0.606314	0.0151012	0.190863	30.36	31.75	15.56	60.33	69.26	36.51	0	2	-	-	-	-	+	+	ebi
chr2R	18094813	18095013	201	*	4.96216	4.34918	5.39101	-0.602028	0.0151205	0.190863	12.65	26.46	22.04	43.74	41.35	40.8	0	3	-	-	-	+	+	+	CG5757
chr2L	18707999	18708199	201	*	5.11351	4.44282	5.56958	-0.609425	0.0151314	0.190863	34.16	11.64	19.44	49.77	59.95	32.75	2	3	+	+	-	+	+	+	Faf2
chr2R	21048942	21049142	201	*	5.31892	4.73444	5.73371	-0.600401	0.0151357	0.190863	37.96	21.16	20.74	46.75	51.69	61.2	3	3	+	+	+	+	+	+
chr2R	13158588	13158788	201	*	6.12696	5.4192	6.59969	-0.611168	0.0151409	0.190863	61.99	39.15	27.22	105.57	134.38	51	2	3	-	+	+	+	+	+	TppII
chr3R	28845464	28845664	201	*	6.38233	5.76595	6.81282	-0.604013	0.0151543	0.190863	80.97	43.39	38.89	99.54	127.15	110.59	2	3	-	+	+	+	+	+	Apc
chr2R	21057644	21057844	201	*	5.78551	5.1883	6.20662	-0.59957	0.0151728	0.190863	37.96	45.5	25.93	67.87	93.03	60.66	3	2	+	+	+	+	-	+	shg
chr4	179357	179557	201	*	6.36009	5.67156	6.82425	-0.609965	0.0151854	0.190863	58.2	68.78	25.93	108.59	152.99	78.38	2	3	+	+	-	+	+	+	Arl4
chr2R	10805199	10805399	201	*	6.02137	5.34593	6.4796	-0.608954	0.0151872	0.190863	56.93	39.15	25.93	105.57	110.61	51.54	3	3	+	+	+	+	+	+	wde
chr2R	6076801	6077001	201	*	5.12266	4.46367	5.57334	-0.606538	0.0152108	0.190863	27.83	25.4	12.96	52.79	58.92	31.14	1	1	+	-	-	-	-	+	CG7849
chr2R	24058187	24058387	201	*	6.08994	5.46654	6.52381	-0.604074	0.0152149	0.190863	55.67	38.1	38.89	82.95	129.21	63.88	1	2	+	-	-	+	+	-	ppk29
chr2L	10292283	10292483	201	*	5.78394	5.21441	6.1912	-0.594186	0.0152155	0.190863	34.16	37.04	40.18	73.9	87.86	57.44	1	3	-	+	-	+	+	+	Ufd4
chrX	10309090	10309290	201	*	5.25114	4.44751	5.76422	-0.610573	0.0152345	0.190945	34.16	22.22	9.07	57.31	83.73	22.01	1	2	-	+	-	-	+	+	alpha-Man-Ia
chr2R	11985306	11985506	201	*	6.332	5.73881	6.75114	-0.59834	0.0152799	0.191159	59.46	59.26	41.48	120.66	121.98	80.53	1	3	-	+	-	+	+	+	RnrS
chr3R	10850374	10850574	201	*	5.42734	4.67301	5.92014	-0.611117	0.0152819	0.191159	22.77	43.39	10.37	46.75	93.03	41.87	0	3	-	-	-	+	+	+	CG4565
chr3R	24295773	24295973	201	*	5.68896	5.12653	6.09259	-0.593325	0.0153069	0.191159	32.89	43.39	28.52	58.82	72.36	73.55	3	3	+	+	+	+	+	+	CG5715
chr2R	6076295	6076495	201	*	5.78534	5.17662	6.21211	-0.600048	0.0153123	0.191159	40.49	43.39	24.63	84.46	83.73	54.22	1	1	+	-	-	-	+	-	CG7849
chr3L	224676	224876	201	*	6.05652	5.3887	6.51127	-0.607917	0.0153143	0.191159	65.79	39.15	20.74	110.1	87.86	75.7	3	3	+	+	+	+	+	+	pyx
chr3L	14153782	14153982	201	*	6.7701	6.15367	7.20062	-0.602275	0.0153407	0.191224	55.67	104.76	53.15	146.29	145.75	149.24	1	2	+	-	-	+	+	-
chr3R	16098674	16098874	201	*	5.96929	5.31192	6.41921	-0.606568	0.0153462	0.191224	31.63	60.32	27.22	73.9	116.81	66.03	1	3	+	-	-	+	+	+	Akt1
chr3L	3073364	3073564	201	*	5.77559	5.0267	6.2661	-0.610583	0.0153691	0.191224	39.22	50.79	7.78	79.93	80.63	70.33	1	3	-	+	-	+	+	+	PAN3
chr3R	24047508	24047708	201	*	5.80508	5.15408	6.25203	-0.606111	0.0153721	0.191224	51.87	38.1	16.85	75.41	90.97	62.27	1	1	+	-	-	-	-	+	Rox8
chr2L	3667676	3667876	201	*	4.90691	5.35307	4.25762	0.607743	0.015391	0.191224	50.61	48.68	23.33	16.59	27.91	12.88	2	3	+	+	-	+	+	+	Drgx
chr3L	17644952	17645152	201	*	6.76167	6.12961	7.19969	-0.603899	0.0154058	0.191224	80.97	88.89	40.18	156.85	162.29	121.86	1	2	-	+	-	+	+	-	Pep
chrX	7937679	7937879	201	*	6.5016	5.72843	7.00227	-0.610022	0.0154164	0.191224	77.18	62.44	19.44	120.66	185.03	78.92	3	2	+	+	+	-	+	+	Ubr3
chr2R	13565728	13565928	201	*	6.76229	5.83023	7.32388	-0.598645	0.0154199	0.191224	130.31	22.22	18.15	144.79	199.5	136.36	0	2	-	-	-	-	+	+
chrX	20689717	20689917	201	*	5.21998	5.65029	4.60398	0.603899	0.0154439	0.191366	48.08	74.08	28.52	25.64	25.84	21.47	3	3	+	+	+	+	+	+	run
chr3R	23758514	23758714	201	*	5.28413	4.66997	5.71355	-0.600557	0.0154736	0.191567	30.36	31.75	14.26	49.77	62.02	45.63	1	1	+	-	-	-	+	-	Hrd3
chr3R	6657779	6657979	201	*	5.75322	5.10377	6.19945	-0.604665	0.0154852	0.191567	32.89	39.15	31.11	79.93	100.27	40.26	0	3	-	-	-	+	+	+	CG1307
chr3L	11261183	11261383	201	*	5.86972	5.1829	6.33311	-0.60801	0.0155143	0.19164	55.67	33.86	19.44	85.97	105.44	50.46	1	3	+	-	-	+	+	+
chr3L	13667333	13667533	201	*	6.08057	5.41332	6.53506	-0.606486	0.0155509	0.19164	53.14	53.97	20.74	87.47	120.94	69.79	0	3	-	-	-	+	+	+	bru3
chr3L	11932861	11933061	201	*	5.34909	4.77532	5.7585	-0.592925	0.0155649	0.19164	25.3	29.63	27.22	54.29	64.09	44.02	2	1	+	-	+	+	-	-	byn
chr3L	22134655	22134855	201	*	6.29158	5.58016	6.76592	-0.608938	0.0155696	0.19164	78.44	39.15	25.93	102.56	150.92	73.01	1	1	-	+	-	-	+	-	olf413
chr3R	1268813	1269013	201	*	5.77424	5.13452	6.2159	-0.602678	0.0155713	0.19164	32.89	46.56	25.93	90.49	85.8	46.71	3	2	+	+	+	+	+	-	Myo81F
chr3L	10663220	10663420	201	*	5.29233	4.66758	5.72685	-0.600961	0.0155753	0.19164	21.51	27.51	27.22	55.8	69.26	33.82	1	3	+	-	-	+	+	+	simj
chr2R	12455053	12455253	201	*	6.47394	5.89503	6.88594	-0.595227	0.0155945	0.19164	55.67	76.19	46.67	101.05	129.21	124.55	2	3	+	+	-	+	+	+	Lac
chr3L	10985631	10985831	201	*	5.57803	4.89075	6.04162	-0.607542	0.015604	0.19164	49.34	25.4	14.26	72.39	79.59	45.63	3	3	+	+	+	+	+	+	klu
chr2L	14690240	14690440	201	*	5.24565	4.56996	5.704	-0.60645	0.0156043	0.19164	32.89	25.4	12.96	51.28	72.36	32.75	2	3	+	+	-	+	+	+	osp
chr3L	11931378	11931578	201	*	5.66589	5.08072	6.08104	-0.595811	0.015638	0.191707	31.63	46.56	23.33	60.33	70.29	72.47	1	1	+	-	-	-	+	-	byn
chr2R	16143021	16143221	201	*	5.39983	4.74009	5.85085	-0.605398	0.0156446	0.191707	39.22	25.4	15.56	52.79	80.63	39.73	2	3	+	+	-	+	+	+	CysRS
chr3R	20594258	20594458	201	*	5.19503	4.60069	5.61473	-0.596904	0.0156577	0.191707	32.89	24.34	15.56	52.79	48.58	45.63	1	3	+	-	-	+	+	+	bon
chr2L	404174	404374	201	*	5.00096	4.38873	5.42944	-0.598905	0.0156663	0.191707	25.3	23.28	14.26	43.74	50.65	34.89	2	3	+	+	-	+	+	+	RpI135
chr3L	16845272	16845472	201	*	5.95239	5.29838	6.40075	-0.604012	0.0156838	0.191707	39.22	52.91	25.93	98.03	103.37	52.07	2	3	+	+	-	+	+	+	kud
chr2L	10342592	10342792	201	*	5.42512	4.80331	5.85823	-0.600892	0.0157119	0.191707	26.57	33.86	23.33	45.25	84.76	44.02	0	2	-	-	-	-	+	+	Sps2
chr2R	13561499	13561699	201	*	6.64775	5.73521	7.20234	-0.598658	0.0157133	0.191707	117.66	20.11	22.04	134.23	208.81	98.78	1	2	-	-	+	+	+	-
chr3R	4806045	4806245	201	*	5.70252	5.05373	6.14843	-0.60381	0.0157135	0.191707	46.81	35.98	16.85	73.9	86.83	52.07	1	2	-	+	-	-	+	+	ctrip
chr3L	6979254	6979454	201	*	5.39665	4.76717	5.83344	-0.600775	0.0157229	0.191707	29.1	37.04	15.56	58.82	68.22	44.02	3	3	+	+	+	+	+	+	Galphai
chr2R	18255105	18255305	201	*	5.18507	4.5271	5.63526	-0.603992	0.0157721	0.19203	31.63	23.28	14.26	51.28	66.16	31.67	2	3	+	+	-	+	+	+	FBgn0265594
chr3L	6767156	6767356	201	*	5.81169	5.22386	6.22816	-0.594958	0.0157845	0.19203	36.69	50.79	24.63	73.9	79.59	71.4	2	3	+	+	-	+	+	+
chr3L	19635161	19635361	201	*	5.68832	4.97161	6.16497	-0.607744	0.0157873	0.19203	35.43	44.45	14.26	46.75	112.67	55.83	0	2	-	-	-	-	+	+	wnd
chr2R	4595193	4595393	201	*	5.8594	5.22666	6.29775	-0.600828	0.0158024	0.192061	27.83	50.79	33.7	93.51	90.97	51.54	1	2	-	+	-	+	+	-	p120ctn
chr3R	15965349	15965549	201	*	5.91336	5.24976	6.36616	-0.604596	0.0158312	0.192257	45.55	46.56	22.04	75.41	117.84	54.22	0	2	-	-	-	+	-	+	CG4287
chr2R	3943141	3943341	201	*	5.00386	4.34679	5.45364	-0.602772	0.0158865	0.192776	11.39	32.81	16.85	43.74	49.62	38.12	2	3	+	+	-	+	+	+	uex
chr2L	18605184	18605384	201	*	5.53521	4.98071	5.93477	-0.587248	0.0159272	0.193088	31.63	30.69	32.41	69.38	60.99	53.15	2	0	+	+	-	-	-	-	CG10413
chr3R	15229573	15229773	201	*	4.90121	4.29042	5.32899	-0.59823	0.0159495	0.193088	21.51	19.05	18.15	36.2	52.72	31.67	1	1	+	-	-	-	-	+	Art3
chr3L	18622031	18622231	201	*	5.56141	4.94891	5.99002	-0.597659	0.0159599	0.193088	39.22	27.51	25.93	75.41	73.39	41.87	3	3	+	+	+	+	+	+	not
chr3L	15147004	15147204	201	*	4.85267	4.203	5.299	-0.600898	0.0159653	0.193088	17.71	23.28	14.26	45.25	45.48	27.38	2	0	+	+	-	-	-	-	FucTA
chr3R	5758883	5759083	201	*	5.40734	4.69209	5.88336	-0.606423	0.0159756	0.193088	40.49	25.4	11.67	69.38	74.43	33.28	2	0	-	+	+	-	-	-	CG2082
chr2R	18157680	18157880	201	*	5.40259	4.83556	5.80857	-0.590479	0.0160186	0.193361	36.69	24.34	24.63	60.33	57.89	49.93	1	1	+	-	-	-	-	+	lolal
chr2R	8130918	8131118	201	*	5.62071	4.97149	6.06683	-0.602666	0.0160335	0.193361	51.87	25.4	16.85	70.88	75.46	54.76	1	2	-	+	-	-	+	+	Pabp2
chr3L	257855	258055	201	*	5.09263	4.42562	5.547	-0.602313	0.0160523	0.193361	21.51	22.22	20.74	63.34	51.69	25.23	1	3	+	-	-	+	+	+	DIP2
chr3L	25417214	25417414	201	*	5.91285	5.36544	6.30874	-0.585896	0.0160609	0.193361	36.69	45.5	41.48	75.41	89.93	72.47	1	1	+	-	-	-	-	+	lovit
chr2R	23049799	23049999	201	*	5.21123	4.37308	5.73794	-0.602712	0.0160793	0.193361	44.28	12.7	5.19	48.26	78.56	33.28	1	3	+	-	-	+	+	+
chr2L	4034490	4034690	201	*	5.96148	5.27918	6.42283	-0.604983	0.0160801	0.193361	60.73	40.21	15.56	70.88	105.44	81.06	1	1	+	-	-	-	+	-	ed
chr3R	24945143	24945343	201	*	5.01893	4.41906	5.44137	-0.59625	0.0160981	0.193361	29.1	16.93	18.15	43.74	50.65	35.97	3	3	+	+	+	+	+	+	ssh
chr2R	5981180	5981380	201	*	5.46836	4.8695	5.8903	-0.594602	0.0161013	0.193361	29.1	39.15	19.44	60.33	68.22	49.39	1	2	-	+	-	-	+	+	mle
chr3L	11118560	11118760	201	*	6.24585	5.57878	6.70025	-0.603454	0.0161147	0.193361	58.2	59.26	25.93	101.05	140.58	70.33	3	3	+	+	+	+	+	+	FoxK
chr4	545602	545974	373	*	7.22338	7.62392	6.66699	0.588142	0.0161251	0.193361	173.33	168.26	250.18	101.05	102.34	101.46	2	3	+	+	-	+	+	+	Thd1
chr2L	21053263	21053463	201	*	5.46503	4.7813	5.92703	-0.604195	0.0162002	0.193831	40.49	26.46	15.56	49.77	93.03	39.73	1	1	+	-	-	-	-	+	Itgbn
chr2R	16014746	16014946	201	*	6.18085	5.43597	6.66965	-0.605587	0.0162103	0.193831	56.93	56.09	16.85	114.62	133.35	57.44	0	2	-	-	-	-	+	+	Prosbeta1
chr2L	22133046	22133246	201	*	5.72057	5.15621	6.12519	-0.588639	0.0162123	0.193831	30.36	45.5	31.11	64.85	79.59	64.96	1	1	+	-	-	-	+	-	CycK
chr3R	8927148	8927348	201	*	5.5294	4.8568	5.98634	-0.602962	0.0162431	0.193831	36.69	35.98	14.26	57.31	89.93	42.95	3	3	+	+	+	+	+	+	pyd
chr3R	24726523	24726723	201	*	6.12557	5.40674	6.60316	-0.605058	0.0162708	0.193831	31.63	76.19	19.44	76.92	97.17	117.57	1	1	+	-	-	-	+	-	tok
chrX	18790060	18790260	201	*	5.76286	4.92782	6.28837	-0.602457	0.0162945	0.193831	24.04	58.2	9.07	79.93	112.67	41.87	2	3	+	+	-	+	+	+	CG6961
chrX	17828764	17828964	201	*	5.35932	4.58367	5.86101	-0.604773	0.0163015	0.193831	27.83	40.21	3.89	58.82	66.16	49.39	0	2	-	-	-	-	+	+	Socs16D
chr3L	19896412	19896612	201	*	7.0199	6.28302	7.50529	-0.604996	0.0163124	0.193831	125.25	77.25	31.11	159.87	242.92	142.26	3	3	+	+	+	+	+	+	Su(Tpl)
chr3R	3974629	3974829	201	*	6.06692	5.40545	6.51874	-0.602035	0.0163141	0.193831	18.98	55.03	53.15	92	110.61	72.47	3	0	+	+	+	-	-	-
chr3R	4311518	4311718	201	*	6.23629	5.52557	6.71032	-0.604487	0.0163179	0.193831	53.14	65.61	19.44	113.11	132.31	68.72	2	0	+	+	-	-	-	-	Vps24
chr2R	7008707	7008907	201	*	5.72951	5.03648	6.19569	-0.603601	0.0163306	0.193831	37.96	30.69	29.81	88.98	99.24	31.67	3	3	+	+	+	+	+	+
chr3L	10516456	10516656	201	*	7.00858	6.30558	7.4792	-0.604317	0.0163446	0.193831	123.99	78.31	35	174.95	219.14	141.19	3	3	+	+	+	+	+	+	Rbfox1
chr3R	12430940	12431140	201	*	5.65211	5.07298	6.06423	-0.590861	0.0163571	0.193831	35.43	37.04	28.52	61.84	86.83	52.07	2	3	+	+	-	+	+	+	CG5641
chr2R	12337714	12337914	201	*	5.4743	4.76986	5.94556	-0.604074	0.0163616	0.193831	37.96	29.63	14.26	52.79	96.13	35.97	3	3	+	+	+	+	+	+	FBgn0011877
chr2L	17477807	17478007	201	*	6.71819	6.08387	7.15729	-0.599325	0.0163827	0.193831	86.03	65.61	51.85	147.8	189.17	91.26	2	1	-	+	+	-	+	-	cass
chr3L	12145998	12146198	201	*	5.3774	4.76273	5.80707	-0.59477	0.0163897	0.193831	25.3	32.81	23.33	67.87	63.06	37.04	1	2	-	+	-	-	+	+	Nrx-IV
chr3R	5264811	5265011	201	*	6.20003	5.49882	6.66986	-0.603927	0.0163944	0.193831	67.05	46.56	22.04	90.49	146.79	68.18	1	1	-	+	-	-	+	-	Tim17a2
chr2L	10403938	10404138	201	*	5.33566	4.73753	5.75723	-0.592887	0.0163956	0.193831	20.24	33.86	25.93	55.8	65.12	41.34	1	2	-	+	-	-	+	+	CG17768
chr3R	9725517	9725717	201	*	6.39951	5.78402	6.82958	-0.596805	0.0164146	0.193831	68.32	52.91	44.07	116.13	148.85	76.23	2	3	+	+	-	+	+	+	hyd
chr2L	8031464	8031664	201	*	5.38131	4.67572	5.85308	-0.603737	0.0164519	0.193831	48.08	16.93	11.67	70.88	55.82	46.71	2	3	+	+	-	+	+	+	CG7367
chr3R	8122626	8122826	201	*	5.35106	4.74623	5.77593	-0.594879	0.0164665	0.193831	25.3	25.4	29.81	49.77	76.49	38.12	1	1	-	+	-	-	-	+	CG7878
chr2L	22169083	22169283	201	*	6.23303	5.56797	6.68651	-0.601437	0.0164738	0.193831	32.89	78.31	31.11	88.98	127.15	92.87	1	2	-	+	-	-	+	+	Clamp
chr3R	22390048	22390248	201	*	5.26285	4.58631	5.72158	-0.601819	0.0164748	0.193831	27.83	33.86	10.37	46.75	72.36	39.19	3	3	+	+	+	+	+	+	CAH8
chr3L	16861097	16861297	201	*	6.16	5.44522	6.63581	-0.603704	0.016487	0.193831	67.05	45.5	18.15	117.64	116.81	63.88	2	1	+	-	+	-	-	+	Rh4
chr2R	6183158	6183358	201	*	5.39109	4.73234	5.84165	-0.601663	0.0164971	0.193831	48.08	14.82	16.85	58.82	56.85	56.37	0	2	-	-	-	+	-	+	CG11211
chr2L	9430979	9431179	201	*	5.10348	4.45024	5.55149	-0.599427	0.0165028	0.193831	29.1	22.22	14.26	52.79	58.92	28.99	1	1	+	-	-	-	+	-	scat
chr3L	18188942	18189142	201	*	5.7558	5.20995	6.15088	-0.584875	0.0165076	0.193831	34.16	32.81	44.07	75.41	60.99	76.77	0	2	-	-	-	-	+	+
chr3L	5779927	5780127	201	*	5.7845	5.21361	6.19246	-0.588872	0.0165545	0.194232	36.69	37.04	37.59	66.36	96.13	56.91	1	1	+	-	-	-	-	+	Myt1
chr3L	17011786	17011986	201	*	5.75916	5.13891	6.19152	-0.59608	0.0165905	0.194505	39.22	44.45	22.04	67.87	97.17	54.22	2	3	+	+	-	+	+	+	CG3764
chr3R	4232912	4233112	201	*	5.83693	5.11863	6.31428	-0.602704	0.0166768	0.195366	51.87	38.1	14.26	82.95	108.54	47.24	0	2	-	-	-	-	+	+	Gel
chr2L	12545731	12545931	201	*	5.89857	5.28765	6.32641	-0.594206	0.0167369	0.19592	46.81	44.45	25.93	79.93	103.37	57.44	2	1	-	+	+	-	-	+	bun
chr2L	16280022	16280222	201	*	6.09234	5.33789	6.58519	-0.602237	0.0167642	0.195984	75.91	28.57	16.85	99.54	123.01	65.5	2	0	+	-	+	-	-	-	crp
chr3L	9401879	9402079	201	*	6.82417	6.01574	7.33917	-0.600289	0.0167682	0.195984	113.87	58.2	22.04	165.9	224.31	95.56	3	3	+	+	+	+	+	+	eIF4E1
chr3L	2467236	2467436	201	*	5.42115	4.73277	5.88524	-0.601173	0.0167852	0.196033	20.24	46.56	12.96	42.23	74.43	60.66	1	1	+	-	-	-	-	+	Svil
chr2R	23653899	23654099	201	*	5.83676	5.26702	6.24412	-0.588046	0.0168169	0.196253	53.14	33.86	28.52	75.41	81.66	70.33	0	2	-	-	-	+	+	-	retn
chr2R	23044969	23045169	201	*	5.98905	5.34027	6.43497	-0.598679	0.0168623	0.196632	21.51	62.44	37.59	69.38	79.59	110.59	2	3	+	+	-	+	+	+	twi
chr2L	19054023	19054223	201	*	5.88244	5.25127	6.32003	-0.596185	0.0168794	0.196681	41.75	34.92	37.59	82.95	111.64	45.1	2	0	+	+	-	-	-	-	l(2)37Bb
chr3R	10854335	10854535	201	*	5.94035	5.35106	6.35755	-0.590587	0.0169077	0.196764	39.22	39.15	44.07	76.92	111.64	57.44	0	3	-	-	-	+	+	+	CG6567
chr2R	12957627	12957827	201	*	6.25848	5.54576	6.73339	-0.601339	0.0169179	0.196764	77.18	37.04	25.93	126.69	130.25	62.27	3	3	+	+	+	+	+	+
chrX	10785925	10786125	201	*	6.11776	5.26197	6.65126	-0.596543	0.0169252	0.196764	48.08	59.26	7.78	87.47	156.09	57.98	0	3	-	-	-	+	+	+	sesB
chr2R	9891857	9892057	201	*	4.97963	4.35186	5.4156	-0.59401	0.0169764	0.196851	17.71	25.4	18.15	43.74	54.79	29.53	2	0	+	+	-	-	-	-	CG1513
chr3L	679670	679870	201	*	5.39881	4.73944	5.84966	-0.597718	0.0169797	0.196851	20.24	39.15	20.74	54.29	81.66	37.04	0	2	-	-	-	-	+	+	CG17129
chr3L	3148292	3148492	201	*	6.01406	5.40012	6.44337	-0.59405	0.0169859	0.196851	53.14	47.62	25.93	73.9	115.77	71.4	1	2	+	-	-	+	+	-	Usp5
chr2L	6048726	6048926	201	*	6.07349	5.41151	6.52555	-0.598611	0.0170107	0.196851	60.73	42.33	24.63	85.97	129.21	61.2	1	1	+	-	-	-	+	-	Pfas
chr3R	16860008	16860208	201	*	5.23024	4.65237	5.64172	-0.590193	0.0170123	0.196851	30.36	24.34	20.74	34.69	64.09	51	3	3	+	+	+	+	+	+	FBgn0264857
chr2R	14601114	14601314	201	*	5.21092	4.51229	5.6796	-0.600286	0.0170246	0.196851	36.69	20.11	11.67	49.77	73.39	30.6	2	1	-	+	+	-	-	+	FBgn0019938
chr3L	10771844	10772044	201	*	5.03715	4.32944	5.50985	-0.599994	0.0170315	0.196851	22.77	23.28	14.26	55.8	59.95	20.94	3	3	+	+	+	+	+	+	CG43245
chrX	10824403	10824603	201	*	5.16971	4.5284	5.61212	-0.596344	0.0170361	0.196851	29.1	23.28	16.85	43.74	71.33	31.67	2	3	+	+	-	+	+	+	FBgn0267184
chr2R	23987855	23988055	201	*	5.95092	5.31031	6.393	-0.596698	0.0170678	0.197068	53.14	41.27	24.63	67.87	121.98	62.27	1	1	+	-	-	-	+	-	Pask
chr2R	14963180	14963380	201	*	6.13089	5.52616	6.5557	-0.591932	0.0170813	0.197075	51.87	53.97	32.41	90.49	123.01	68.72	1	2	-	+	-	+	+	-	ckn
chr3L	7528669	7528869	201	*	5.80768	5.16996	6.24839	-0.59517	0.0171223	0.197398	46.81	39.15	22.04	96.52	82.7	48.85	1	3	+	-	-	+	+	+	lqf
chr3R	24749328	24749528	201	*	6.83816	6.25991	7.24983	-0.588216	0.0171586	0.197485	98.68	79.37	51.85	144.79	155.06	156.76	2	3	+	+	-	+	+	+	tld
chr3R	2335874	2336074	201	*	5.36139	5.79829	4.73168	0.596479	0.0171651	0.197485	31.63	89.95	45.37	30.16	23.78	25.77	1	3	-	+	-	+	+	+	Myo81F
chrX	6983657	6983857	201	*	5.72141	5.01093	6.19534	-0.599829	0.0171752	0.197485	40.49	38.1	18.15	63.34	117.84	38.65	0	2	-	-	-	+	+	-	ogre
chrX	8211039	8211239	201	*	5.5297	4.87943	5.97631	-0.596018	0.0171816	0.197485	22.77	48.68	16.85	61.84	74.43	52.61	1	1	-	+	-	-	+	-	sdt
chr3L	6904162	6904362	201	*	7.17247	6.39103	7.67655	-0.598612	0.0172558	0.198057	150.56	57.14	44.07	224.72	282.2	106.83	1	3	+	-	-	+	+	+
chr3L	22773693	22773893	201	*	5.63826	4.92355	6.11405	-0.599514	0.0172574	0.198057	46.81	33.86	10.37	63.34	96.13	48.32	2	3	+	+	-	+	+	+	SPoCk
chr3R	27165576	27165776	201	*	4.94965	4.28781	5.40164	-0.596912	0.0172953	0.19809	21.51	13.76	23.33	43.74	58.92	24.16	1	3	+	-	-	+	+	+	spn-D
chr2R	13592672	13592872	201	*	6.33506	5.78571	6.73196	-0.582104	0.0173246	0.19809	65.79	46.56	53.15	96.52	121.98	100.39	2	1	+	+	-	-	+	-	CG6191
chr2R	7484575	7484775	201	*	6.2713	5.62704	6.7151	-0.595983	0.0173447	0.19809	77.18	41.27	29.81	87.47	136.45	91.26	3	3	+	+	+	+	+	+	wech
chr3L	23103646	23103846	201	*	5.25445	4.53297	5.73319	-0.598965	0.0173459	0.19809	34.16	27.51	7.78	64.85	63.06	31.67	2	3	+	+	-	+	+	+
chr2L	12048833	12049033	201	*	4.9258	4.30969	5.35616	-0.591025	0.0173516	0.19809	22.77	21.16	15.56	43.74	49.62	29.53	1	2	+	-	-	+	+	-	CG6770
chr3L	21523079	21523279	201	*	6.05122	5.39093	6.5025	-0.59636	0.0173628	0.19809	41.75	58.2	25.93	88.98	126.11	56.91	1	1	-	+	-	-	+	-	CG7611
chr2L	13905521	13905721	201	*	5.91661	5.32981	6.33256	-0.588602	0.0173676	0.19809	44.28	46.56	29.81	61.84	108.54	71.4	2	3	+	+	-	+	+	+	Ance
chr2L	9705444	9705644	201	*	6.14384	5.43887	6.61534	-0.59871	0.0173743	0.19809	50.61	61.38	18.15	78.43	141.62	74.08	1	2	+	-	-	+	-	+	pelo
chr3R	24230754	24230954	201	*	6.20891	5.49513	6.68429	-0.598878	0.0173772	0.19809	60.73	60.32	14.26	99.54	120.94	88.04	1	2	+	-	-	-	+	+	Spase22-23
chr3R	4841944	4842144	201	*	4.87765	4.20597	5.33416	-0.595833	0.0174046	0.198253	22.77	22.22	10.37	49.77	45.48	25.77	3	3	+	+	+	+	+	+
chr3R	12426149	12426349	201	*	6.78532	5.95264	7.3099	-0.594647	0.0174213	0.198296	127.78	35.98	22.04	155.34	203.64	117.03	3	3	+	+	+	+	+	+	Pp1-87B
chr2L	2855977	2856177	201	*	5.6175	5.06032	6.01845	-0.581625	0.017444	0.198361	37.96	34.92	27.22	66.36	74.43	53.68	2	3	+	+	-	+	+	+	RpS21
chr3L	14454911	14455111	201	*	5.26491	4.67446	5.68268	-0.587064	0.017453	0.198361	30.36	30.69	15.56	57.31	51.69	45.1	2	1	+	+	-	-	-	+	bbg
chrX	16254598	16254798	201	*	7.28304	6.66885	7.71248	-0.591621	0.0175093	0.198726	92.36	131.22	81.66	200.59	285.3	143.34	0	2	-	-	-	+	+	-	FBgn0003920
chr3R	10407246	10407446	201	*	5.47925	4.91128	5.88572	-0.583954	0.0175241	0.198726	40.49	26.46	23.33	64.85	60.99	51.54	1	2	-	+	-	-	+	+	CG6325
chr3R	9763685	9763885	201	*	5.61481	4.92503	6.07954	-0.597324	0.0175265	0.198726	43.02	33.86	14.26	63.34	98.2	41.34	1	1	-	+	-	-	+	-	CG8478
chr2R	10468400	10468600	201	*	6.59864	5.87148	7.07984	-0.598037	0.017557	0.198726	72.12	81.48	22.04	125.18	182.97	97.71	1	1	+	-	-	+	-	-	Caf1-105
chr3L	18348389	18348589	201	*	5.61003	4.97573	6.04911	-0.592465	0.01756	0.198726	34.16	43.39	16.85	75.41	75.46	47.78	2	3	+	+	-	+	+	+
chr4	69238	69438	201	*	6.12954	5.55296	6.54037	-0.58567	0.0175658	0.198726	51.87	53.97	35	81.44	118.88	78.92	0	2	-	-	-	-	+	+	RpS3A
chr3R	29153122	29153322	201	*	6.74573	6.05845	7.20933	-0.597168	0.0175765	0.198726	96.15	68.78	35	146.29	201.57	96.1	1	3	+	-	-	+	+	+	Rpn2
chr2R	21168561	21168761	201	*	5.82664	5.15334	6.28389	-0.596401	0.0176065	0.198739	59.46	31.75	15.56	76.92	95.1	61.74	2	3	+	+	-	+	+	+	CG4266
chr3R	6149737	6149937	201	*	5.06085	4.21611	5.59011	-0.593693	0.0176128	0.198739	31.63	13.76	10.37	61.84	69.26	13.42	2	3	+	+	-	+	+	+
chr3R	5779180	5779380	201	*	5.90378	5.22426	6.36387	-0.596528	0.0176193	0.198739	56.93	25.4	29.81	95.02	107.5	44.56	1	2	+	-	-	+	-	+	CG2082
chr2L	5421811	5422011	201	*	5.24762	5.66611	4.65572	0.584386	0.0176297	0.198739	49.34	55.03	47.96	15.08	31.01	29.53	1	3	+	-	-	+	+	+
chr3R	12650685	12650885	201	*	5.57595	4.94637	6.01279	-0.591606	0.0176504	0.198824	40.49	33.86	18.15	79.93	70.29	43.48	3	3	+	+	+	+	+	+	Dtg
chr2L	867951	868151	201	*	5.98215	5.4065	6.3925	-0.585533	0.0176957	0.199188	44.28	51.85	31.11	63.34	104.4	84.28	2	3	+	+	-	+	+	+	aru
chr3R	14630250	14630450	201	*	5.3522	4.7187	5.79091	-0.591619	0.0177228	0.199346	29.1	31.75	18.15	57.31	74.43	34.36	3	3	+	+	+	+	+	+	Cad88C
chrX	22540025	22540225	201	*	4.94771	4.21793	5.43004	-0.596612	0.0178085	0.199686	12.65	32.81	10.37	34.69	65.12	29.53	2	3	+	+	-	+	+	+	CG17598
chr4	225944	226144	201	*	5.33449	4.59442	5.82124	-0.596653	0.0178113	0.199686	25.3	38.1	9.07	73.9	65.12	30.6	1	1	+	-	-	+	-	-	yellow-h
chr3R	6409148	6409348	201	*	5.56354	4.89674	6.01782	-0.594125	0.0178233	0.199686	27.83	43.39	18.15	67.87	87.86	38.65	2	2	+	+	-	-	+	+	gpp
chr3L	2146211	2146411	201	*	5.4	4.7715	5.83632	-0.591069	0.017824	0.199686	34.16	29.63	18.15	55.8	78.56	37.04	3	3	+	+	+	+	+	+	zormin
chr2R	12348774	12348974	201	*	5.44701	4.88272	5.8516	-0.582224	0.0178289	0.199686	25.3	35.98	27.22	48.26	72.36	52.61	1	1	+	-	-	+	-	-	CG30047
chr2R	6419773	6419973	201	*	5.11897	4.51785	5.54201	-0.586963	0.0178324	0.199686	15.18	32.81	20.74	46.75	51.69	41.34	1	1	-	+	-	-	-	+
chr2R	11635219	11635419	201	*	5.16735	4.56519	5.59091	-0.587575	0.0178456	0.199686	17.71	33.86	19.44	42.23	59.95	42.41	1	1	+	-	-	-	+	-	CG9005
chr2R	8604257	8604457	201	*	4.98567	4.36568	5.41791	-0.593198	0.0178579	0.199686	22.77	22.22	16.85	21.11	47.55	59.59	2	3	+	+	-	+	+	+	rgr
chr2R	24113658	24113858	201	*	5.01396	4.41265	5.43711	-0.58794	0.0179623	0.200612	20.24	30.69	12.96	37.7	43.42	48.85	1	1	+	-	-	-	-	+	CG4049
chr3L	10873086	10873286	201	*	5.01457	4.39152	5.44829	-0.591893	0.0179749	0.200612	35.43	15.87	11.67	39.21	42.38	49.39	2	3	+	+	-	+	+	+	tna
chr2L	18652831	18653031	201	*	5.92071	5.33429	6.33648	-0.584605	0.0180073	0.200612	43.02	50.79	27.22	82.95	96.13	63.35	2	1	-	+	+	-	+	-	Cyp310a1
chrX	4699474	4699674	201	*	4.99956	5.48392	4.26508	0.595531	0.0180149	0.200612	29.1	85.72	19.44	18.1	17.57	22.01	2	1	-	+	+	+	-	-	ctp
chr3R	9872382	9872582	201	*	6.8828	6.23471	7.3284	-0.592694	0.0180209	0.200612	102.48	79.37	44.07	165.9	206.74	109.52	2	1	+	-	+	+	-	-	Glut4EF
chr2R	23868854	23869054	201	*	5.31756	4.75754	5.71997	-0.580887	0.0180487	0.200612	32.89	27.51	20.74	46.75	63.06	48.32	1	3	+	-	-	+	+	+	ken
chr3R	18172166	18172366	201	*	6.20419	5.52188	6.66554	-0.594462	0.0180544	0.200612	69.59	42.33	25.93	111.61	133.35	59.59	1	2	-	+	-	-	+	+	wrd
chr2R	8241915	8242115	201	*	6.09128	5.3579	6.57516	-0.595337	0.0180583	0.200612	68.32	39.15	15.56	92	132.31	61.74	0	2	-	-	-	+	+	-	FBgn0265303
chr2R	5293908	5294108	201	*	5.01114	4.41025	5.43408	-0.585722	0.0180591	0.200612	20.24	25.4	18.15	43.74	53.75	32.21	3	3	+	+	+	+	+	+	d4
chr3L	128539	128739	201	*	6.71378	6.0105	7.18453	-0.594999	0.0180959	0.200625	103.75	62.44	27.22	132.72	185.03	118.64	3	3	+	+	+	+	+	+	Pdk1
chr2R	24665904	24666104	201	*	6.59398	5.90038	7.06041	-0.594444	0.0181566	0.200625	26.57	99.47	53.15	110.1	141.62	148.71	1	2	-	+	-	+	+	-	CG30161
chr3R	31739495	31739695	201	*	6.00025	5.3792	6.43299	-0.588964	0.0181581	0.200625	45.55	50.79	28.52	84.46	117.84	56.91	1	2	+	-	-	-	+	+	eEF1alpha2
chr2L	10842528	10842728	201	*	6.49261	5.86818	6.92698	-0.589683	0.0181609	0.200625	65.79	66.67	42.78	117.64	168.49	78.92	3	3	+	+	+	+	+	+	CG6700
chr3L	3197551	3197751	201	*	5.39529	4.72525	5.85106	-0.593115	0.0181631	0.200625	39.22	23.28	16.85	60.33	80.63	32.21	0	2	-	-	-	-	+	+	CG14966
chr2R	20596217	20596417	201	*	6.08013	5.43009	6.52664	-0.592409	0.0181718	0.200625	70.85	33.86	24.63	81.44	117.84	77.31	1	3	-	+	-	+	+	+	HnRNP-K
chr3L	7243860	7244060	201	*	5.38135	4.75773	5.81533	-0.589232	0.0181758	0.200625	22.77	28.57	29.81	49.77	83.73	35.43	3	3	+	+	+	+	+	+	mei-P22
chr2R	24099050	24099250	201	*	6.12625	5.48588	6.56821	-0.591002	0.0181915	0.200625	58.2	52.91	23.33	95.02	120.94	68.72	2	0	+	-	+	-	-	-	gek
chr4	502710	502910	201	*	5.96642	5.32289	6.40988	-0.591745	0.0182004	0.200625	64.52	29.63	25.93	76.92	112.67	65.5	1	2	-	+	-	-	+	+	zfh2
chr2R	13991766	13991966	201	*	6.3447	5.61043	6.82897	-0.5946	0.0182009	0.200625	56.93	74.08	15.56	131.21	126.11	83.75	0	2	-	-	-	+	+	-	mam
chr3L	7356612	7356812	201	*	5.01929	4.31651	5.48982	-0.59369	0.0182285	0.200625	25.3	25.4	9.07	54.29	55.82	24.69	3	2	+	+	+	-	+	+	CTCF
chr3L	9972026	9972413	388	*	6.32106	5.59014	6.80389	-0.594437	0.0182335	0.200625	59.46	65.61	19.44	113.11	157.12	64.96	0	3	-	-	-	+	+	+	CG6674
chr3R	7122864	7123064	201	*	5.70578	5.12089	6.12078	-0.584561	0.0182436	0.200625	50.61	31.75	22.04	66.36	79.59	62.81	2	3	+	+	-	+	+	+	CG10098
chr3L	18296493	18296693	201	*	5.84977	5.17871	6.30601	-0.592855	0.0182471	0.200625	48.08	47.62	12.96	81.44	90.97	64.96	2	3	+	+	-	+	+	+	CG5103
chr2L	3466262	3466462	201	*	5.29798	4.75238	5.69292	-0.577406	0.0182577	0.200625	25.3	29.63	25.93	43.74	60.99	50.46	2	3	+	+	-	+	+	+	msl-2
chr2R	10428985	10429185	201	*	6.23457	5.55725	6.69366	-0.592904	0.0183001	0.200768	53.14	63.49	24.63	105.57	141.62	63.35	3	3	+	+	+	+	+	+	CG12896
chr4	1123286	1123486	201	*	5.77915	5.09485	6.2414	-0.592961	0.018303	0.200768	18.98	55.03	28.52	78.43	101.3	47.24	0	2	-	-	-	-	+	+	Arf102F
chr2L	4810142	4810342	201	*	6.00271	5.31725	6.46549	-0.593498	0.0183104	0.200768	69.59	25.4	24.63	84.46	117.84	62.81	3	3	+	+	+	+	+	+	CG15629
chr2L	17484412	17484612	201	*	5.0169	4.38891	5.45299	-0.588361	0.018335	0.200773	30.36	16.93	15.56	54.29	46.52	30.6	2	3	+	+	-	+	+	+	GCS2beta
chr3R	17733442	17733642	201	*	5.69594	5.05998	6.13582	-0.589447	0.0183545	0.200773	44.28	28.57	27.22	85.97	85.8	39.19	2	3	+	+	-	+	+	+	CG14321
chr2L	7023879	7024079	201	*	5.41588	4.78081	5.85534	-0.588785	0.0183595	0.200773	26.57	33.86	22.04	61.84	78.56	33.28	0	2	-	-	-	-	+	+	Gart
chr3L	203645	203845	201	*	4.92505	4.27732	5.37048	-0.591055	0.0183768	0.200773	29.1	14.82	14.26	36.2	58.92	28.99	0	3	-	-	-	+	+	+	NitFhit
chrX	13385122	13385322	201	*	5.33366	4.6361	5.80186	-0.593156	0.0183772	0.200773	30.36	33.86	10.37	49.77	82.7	34.89	2	2	+	+	-	-	+	+	Rbp1-like
chr3L	10985941	10986141	201	*	4.94722	4.32317	5.38141	-0.588243	0.0183898	0.200773	29.1	17.99	12.96	42.23	51.69	31.14	2	3	+	+	-	+	+	+	klu
chr2L	542479	542679	201	*	5.47653	4.87001	5.90223	-0.585374	0.0184544	0.201293	27.83	39.15	20.74	55.8	79.59	44.02	1	3	+	-	-	+	+	+	lwr
chr3L	1208235	1208435	201	*	5.28789	4.6662	5.72095	-0.586844	0.0184639	0.201293	34.16	26.46	15.56	63.34	58.92	35.97	1	1	-	+	-	-	+	-	LysB
chr3R	10368385	10368585	201	*	5.23288	4.53238	5.70239	-0.592996	0.0184795	0.201309	41.75	9.52	18.15	60.33	60.99	34.89	1	1	+	-	-	-	+	-	Rfx
chr3R	15242485	15242685	201	*	6.32699	5.72005	6.75289	-0.586518	0.0184917	0.201309	68.32	44.45	45.37	99.54	148.85	75.16	1	1	-	+	-	-	-	+	tefu
chr3L	8189859	8190251	393	*	6.52103	5.92995	6.93912	-0.583928	0.018531	0.201527	74.65	71.96	36.3	132.72	117.84	117.57	0	3	-	-	-	+	+	+	Atg18a
chr2L	10341510	10341710	201	*	5.70287	5.06549	6.14341	-0.588673	0.0185382	0.201527	26.57	51.85	22.04	64.85	94.07	53.15	3	3	+	+	+	+	+	+	Sps2
chrX	635913	636113	201	*	5.80602	5.12949	6.26475	-0.59156	0.01856	0.20162	17.71	61.38	25.93	66.36	96.13	68.18	2	3	+	+	-	+	+	+	su(sable)
chr2L	9983411	9983611	201	*	5.54618	4.84725	6.015	-0.592029	0.0186035	0.20172	20.24	51.85	14.26	58.82	85.8	49.39	0	2	-	-	-	-	+	+	bib
chr3R	14277787	14277987	201	*	5.67613	4.97652	6.14525	-0.592063	0.0186263	0.20172	41.75	42.33	10.37	69.38	93.03	49.93	1	2	+	-	-	-	+	+	trx
chr2R	21017360	21017560	201	*	5.12908	4.46231	5.58334	-0.59019	0.0186382	0.20172	30.36	25.4	10.37	52.79	60.99	30.06	3	2	+	+	+	-	+	+	CG3295
chr3R	18079055	18079255	201	*	5.9991	5.31808	6.45987	-0.591574	0.0186449	0.20172	15.18	65.61	38.89	75.41	90.97	97.71	1	2	+	-	-	-	+	+	CG14317
chr3R	29835426	29835626	201	*	5.4774	4.71814	5.97228	-0.592037	0.0186466	0.20172	30.36	31.75	16.85	75.41	92	20.94	0	2	-	-	-	-	+	+	Atg16
chr3L	21515501	21515701	201	*	5.83692	5.28325	6.23606	-0.577774	0.0186711	0.20172	43.02	34.92	38.89	60.33	99.24	66.57	0	3	-	-	-	+	+	+	SAK
chr2R	5241622	5241822	201	*	5.62604	4.99494	6.0636	-0.587048	0.0186805	0.20172	35.43	43.39	16.85	76.92	76.49	47.24	1	3	-	+	-	+	+	+	Nipped-A
chr2L	8211010	8211210	201	*	5.62454	5.00543	6.05635	-0.586518	0.0186857	0.20172	46.81	27.51	22.04	72.39	82.7	44.56	1	1	+	-	-	+	-	-	Su(var)205
chr3R	1916681	1916881	201	*	5.72654	5.03587	6.19166	-0.591296	0.0186883	0.20172	27.83	55.03	15.56	78.43	92	48.85	2	3	+	+	-	+	+	+	Myo81F
chr3L	11237369	11237569	201	*	7.13323	6.49003	7.57652	-0.589056	0.0187323	0.202052	107.54	120.64	41.48	190.03	198.47	184.14	2	3	+	+	-	+	+	+	Ir68a
chr2R	12904411	12904611	201	*	6.59821	5.84734	7.08956	-0.591265	0.018759	0.202196	108.81	32.81	31.11	147.8	169.53	91.26	1	1	+	-	-	-	+	-	FBgn0265654
chr3L	14992152	14992352	201	*	5.12124	4.56065	5.52394	-0.576709	0.0187878	0.202364	27.83	22.22	20.74	52.79	44.45	40.8	3	3	+	+	+	+	+	+	Zip71B
chr4	959488	959688	201	*	6.03993	5.43893	6.46292	-0.583486	0.0188045	0.202401	41.75	50.79	37.59	92	116.81	55.83	1	3	+	-	-	+	+	+	4E-T
chr3L	15715129	15715329	201	*	5.06214	4.45002	5.49056	-0.585644	0.0188962	0.202666	10.12	24.34	31.11	39.21	52.72	42.95	1	1	-	+	-	+	-	-	CG42570
chr3L	378035	378235	201	*	7.77233	7.03153	8.25939	-0.590727	0.0189053	0.202666	210.02	139.69	42.78	268.46	356.63	294.19	2	3	+	+	-	+	+	+	trh
chr2L	20082693	20082893	201	*	5.20091	4.61208	5.61788	-0.583578	0.0189225	0.202666	34.16	15.87	23.33	39.21	64.09	44.02	2	2	+	+	-	+	+	-	neb
chr2R	18536627	18536827	201	*	6.20177	5.53195	6.65744	-0.589778	0.0189246	0.202666	73.38	43.39	22.04	99.54	129.21	74.08	1	2	-	+	-	-	+	+	Pepck1
chr3L	19861298	19861498	201	*	5.36111	4.74437	5.79177	-0.585731	0.0189346	0.202666	39.22	24.34	16.85	46.75	76.49	42.95	2	0	-	+	+	-	-	-	FBgn0266982
chr2L	5403649	5403849	201	*	7.48331	6.60502	8.02531	-0.581706	0.0189359	0.202666	210.02	56.09	25.93	235.28	338.02	208.3	1	2	-	+	-	+	+	-	H15
chr3L	258174	258374	201	*	6.27964	5.62262	6.7294	-0.588958	0.0189465	0.202666	70.85	49.74	27.22	98.03	147.82	72.47	1	3	+	-	-	+	+	+	DIP2
chr3L	13387686	13387886	201	*	5.51094	4.90032	5.93863	-0.583653	0.0189708	0.202666	39.22	29.63	20.74	70.88	73.39	39.73	2	3	+	+	-	+	+	+	CG10171
chrX	19788780	19788980	201	*	5.68063	4.9625	6.15791	-0.590618	0.0189761	0.202666	45.55	40.21	7.78	67.87	88.9	57.44	1	3	-	+	-	+	+	+	FBgn0266179
chr2R	20962439	20962639	201	*	5.16103	4.5531	5.58742	-0.584244	0.0189821	0.202666	27.83	29.63	12.96	37.7	63.06	43.48	2	0	+	+	-	-	-	-	hbn
chr2R	24045868	24046068	201	*	6.20334	5.5946	6.63012	-0.584657	0.0189844	0.202666	67.05	45.5	32.41	85.97	133.35	77.84	1	1	+	-	-	-	+	-	sei
chr3R	5223253	5223453	201	*	5.16551	4.58792	5.57684	-0.578392	0.0189887	0.202666	20.24	28.57	23.33	48.26	57.89	37.04	2	3	+	+	-	+	+	+	Sccpdh1
chr2L	1654347	1654547	201	*	5.19679	4.62661	5.60438	-0.577187	0.0190089	0.202691	26.57	30.69	16.85	51.28	50.65	44.02	2	1	+	+	-	-	-	+	chinmo
chr2L	7811848	7812048	201	*	5.10464	4.4831	5.53762	-0.586426	0.0190239	0.202691	35.43	14.82	16.85	39.21	62.02	38.12	1	1	+	-	-	-	-	+	cdc14
chr3R	11211237	11211437	201	*	5.78116	5.22676	6.18067	-0.574372	0.019031	0.202691	32.89	44.45	35	75.41	84.76	57.44	3	3	+	+	+	+	+	+	SdhC
chr3R	9038829	9039029	201	*	5.34388	4.76488	5.75592	-0.578831	0.0190583	0.202716	35.43	25.4	20.74	60.33	60.99	40.8	3	3	+	+	+	+	+	+	neur
chr2R	4821763	4821963	201	*	4.85507	4.16689	5.31908	-0.588903	0.0190599	0.202716	15.18	29.63	9.07	42.23	49.62	27.92	1	1	-	-	+	-	-	+	CG17528
chr3L	1410457	1410657	201	*	5.30284	4.52164	5.80681	-0.588954	0.0191005	0.202718	37.96	17.99	12.96	82.95	65.12	19.86	0	2	-	-	-	-	+	+	CG9168
chr3R	16869375	16869575	201	*	7.15641	6.45267	7.62736	-0.589937	0.0191043	0.202718	154.35	53.97	54.44	173.44	265.66	154.07	1	2	-	+	-	-	+	+	FBgn0264857
chr2R	21727767	21727967	201	*	4.9521	4.36012	5.37063	-0.580445	0.0191049	0.202718	22.77	23.28	15.56	40.72	50.65	32.75	2	3	+	+	-	+	+	+	FBgn0265963
chr3L	2489951	2490151	201	*	5.5648	5.02903	5.9546	-0.571382	0.0191133	0.202718	39.22	32.81	25.93	61.84	64.09	60.13	3	3	+	+	+	+	+	+	CG1146
chr2R	11289349	11289549	201	*	6.64934	5.9479	7.11927	-0.589469	0.0191839	0.203199	92.36	65.61	27.22	140.26	185.03	91.8	2	3	+	+	-	+	+	+	Fbl6
chr3L	24744580	24744780	201	*	4.93498	4.34299	5.35352	-0.580915	0.0191853	0.203199	18.98	21.16	20.74	36.2	54.79	31.67	3	1	+	+	+	-	+	-	scro
chr3R	30387236	30387436	201	*	5.09572	4.4684	5.53148	-0.584169	0.0192186	0.20341	18.98	25.4	22.04	46.75	64.09	27.92	2	3	+	+	-	+	+	+	Fer2LCH
chr3R	6170845	6171045	201	*	5.90751	5.06649	6.43533	-0.583776	0.0192669	0.203564	50.61	20.11	29.81	113.11	126.11	20.4	1	1	+	-	-	-	-	+	Osi1
chr3L	20406607	20406807	201	*	5.76028	5.12585	6.19943	-0.585948	0.0192805	0.203564	39.22	48.68	16.85	51.28	95.1	74.08	0	3	-	-	-	+	+	+	FBgn0267635
chr2R	17535505	17535705	201	*	6.51938	5.79382	6.99988	-0.589007	0.019288	0.203564	99.95	44.45	22.04	134.23	149.89	99.85	3	0	+	+	+	-	-	-	eIF3b
chr2L	21814535	21814735	201	*	5.04543	4.39661	5.49136	-0.585959	0.0193216	0.203564	25.3	27.51	10.37	40.72	62.02	32.21	2	3	-	+	+	+	+	+
chr3R	11772257	11772457	201	*	5.61414	5.00357	6.04181	-0.583629	0.0193603	0.203564	51.87	27.51	16.85	60.33	72.36	64.96	2	3	-	+	+	+	+	+	l(3)neo38
chr3L	10677970	10678170	201	*	5.45696	4.89017	5.86283	-0.576871	0.0193644	0.203564	30.36	39.15	19.44	48.26	65.12	61.2	2	3	+	+	-	+	+	+	simj
chr2L	21344186	21344386	201	*	5.8791	5.29287	6.29478	-0.579189	0.0193664	0.203564	39.22	43.39	35	75.41	107.5	52.61	0	2	-	-	-	+	+	-	Tsp39D
chr2L	3657497	3657697	201	*	6.7403	6.08087	7.19118	-0.586931	0.0193743	0.203564	72.12	92.07	38.89	170.43	177.8	90.19	3	3	+	+	+	+	+	+	for
chr3R	17394486	17394686	201	*	6.44785	5.762	6.9108	-0.588096	0.0193848	0.203564	51.87	88.89	22.04	119.15	132.31	109.52	1	1	+	-	-	+	-	-	CREG
chr2L	4031782	4031982	201	*	6.91807	6.35364	7.32273	-0.576363	0.019399	0.203564	82.24	104.76	58.33	140.26	175.73	164.27	2	3	+	+	-	+	+	+	ed
chr2L	10474247	10474447	201	*	4.97745	4.29169	5.44037	-0.587684	0.0194013	0.203564	29.1	17.99	11.67	48.26	58.92	23.08	3	3	+	+	+	+	+	+	RluA-2
chr4	329203	329403	201	*	6.21724	5.54821	6.67254	-0.587148	0.0194137	0.203564	55.67	61.38	23.33	117.64	126.11	62.27	3	3	+	+	+	+	+	+	CG32850
chr3R	14893848	14894048	201	*	5.40585	4.7874	5.83735	-0.583058	0.019439	0.203564	31.63	20.11	31.11	64.85	73.39	33.28	3	3	+	+	+	+	+	+	CG7265
chr3L	19561048	19561248	201	*	5.95285	5.34639	6.37852	-0.581379	0.0194394	0.203564	39.22	58.2	24.63	87.47	97.17	64.96	0	2	-	-	-	+	+	-	FBgn0265887
chr3R	7109751	7109951	201	*	6.6884	6.02775	7.13984	-0.58669	0.0194634	0.203564	68.32	96.3	31.11	138.75	171.59	112.74	2	3	+	+	-	+	+	+	Alh
chr3R	4641825	4642025	201	*	5.75096	5.19989	6.14874	-0.572317	0.0194651	0.203564	35.43	47.62	27.22	72.39	74.43	66.03	3	1	+	+	+	-	-	+	CG9775
chr3R	16839762	16839962	201	*	5.99495	5.44959	6.38977	-0.572088	0.0194796	0.203564	45.55	51.85	33.7	73.9	98.2	79.45	1	3	+	-	-	+	+	+	FBgn0264857
chr2L	8849351	8849551	201	*	5.27293	4.6611	5.70121	-0.581876	0.0194907	0.203564	35.43	27.51	12.96	54.29	60.99	40.8	2	3	+	+	-	+	+	+
chr2R	17514091	17514291	201	*	5.23259	4.57367	5.68323	-0.586659	0.0194965	0.203564	40.49	17.99	12.96	45.25	71.33	37.58	2	0	+	-	+	-	-	-	CG4853
chr3R	21097961	21098161	201	*	5.44835	4.87846	5.85579	-0.5759	0.019512	0.203564	31.63	30.69	25.93	54.29	76.49	42.95	2	3	+	+	-	+	+	+	RhoGAP93B
chr3R	14326331	14326531	201	*	5.80245	5.10456	6.27081	-0.587857	0.0195137	0.203564	60.73	24.34	18.15	66.36	112.67	52.61	1	1	-	-	+	-	-	+	spn-B
chr4	695964	696164	201	*	5.46619	4.8553	5.89401	-0.581721	0.019558	0.203802	25.3	43.39	18.15	48.26	77.53	52.61	0	2	-	-	-	+	+	-	ey
chr2R	20582638	20582838	201	*	5.82445	5.21468	6.25173	-0.581262	0.0195659	0.203802	43.02	35.98	32.41	88.98	96.13	43.48	2	3	+	+	-	+	+	+	qsm
chr2L	8382755	8382955	201	*	6.27155	5.60818	6.72425	-0.586301	0.0195766	0.203802	68.32	50.79	27.22	108.59	144.72	63.88	1	2	+	-	-	-	+	+	AlaRS
chr2R	6594988	6595188	201	*	5.7534	5.08677	6.2076	-0.586501	0.0196092	0.203864	59.46	24.34	18.15	72.39	95.1	54.22	2	2	+	+	-	+	+	-	jing
chr3L	707791	707991	201	*	5.17458	4.52856	5.6192	-0.584623	0.0196758	0.203864	34.16	16.93	18.15	51.28	67.19	28.99	1	1	+	-	-	-	+	-	CG13895
chrX	11453231	11453431	201	*	5.50931	4.78704	5.98839	-0.587144	0.0196759	0.203864	30.36	43.39	9.07	61.84	88.9	39.73	1	1	-	+	-	-	+	-	HP5
chr3R	5470823	5471023	201	*	5.52656	4.83769	5.99086	-0.586656	0.0196903	0.203864	45.55	28.57	11.67	67.87	83.73	39.19	1	3	-	-	+	+	+	+	Snr1
chr3R	27677083	27677283	201	*	5.26722	4.6366	5.70455	-0.582588	0.0196957	0.203864	30.36	22.22	22.04	61.84	66.16	28.45	1	1	+	-	-	-	-	+	unc80
chr2L	13885348	13885548	201	*	4.82494	4.09407	5.30775	-0.586914	0.019716	0.203864	24.04	11.64	15.56	42.23	59.95	16.64	1	3	+	-	-	+	+	+	CenG1A
chr2L	22144226	22144426	201	*	6.36891	5.74514	6.80296	-0.58251	0.0197188	0.203864	48.08	80.43	32.41	114.62	132.31	88.04	2	3	+	+	-	+	+	+	CG42748
chr3R	15030507	15030707	201	*	4.85226	5.26431	4.27325	0.578149	0.0197202	0.203864	32.89	37.04	45.37	24.13	12.4	21.47	1	1	+	-	-	+	-	-
chr3L	20719285	20719485	201	*	5.12143	4.44517	5.58003	-0.585856	0.0197237	0.203864	34.16	16.93	14.26	58.82	58.92	25.77	2	3	+	+	-	+	+	+	cmpy
chr3L	17514216	17514416	201	*	5.61352	4.92686	6.07684	-0.586715	0.0197322	0.203864	54.4	14.82	22.04	54.29	96.13	52.07	1	2	-	+	-	-	+	+	U4-U6-60K
chr3R	8992876	8993076	201	*	5.67299	5.02276	6.11959	-0.584386	0.0197411	0.203864	46.81	33.86	16.85	82.95	82.7	42.95	1	1	+	-	-	-	+	-	CG11975
chr2L	2770036	2770236	201	*	5.76536	5.12478	6.20742	-0.584017	0.0197501	0.203864	53.14	35.98	15.56	76.92	87.86	56.91	1	1	-	+	-	-	+	-	colt
chr2L	441881	442081	201	*	5.22113	4.61914	5.6446	-0.579325	0.0197618	0.203864	22.77	32.81	18.15	43.74	68.22	38.12	2	2	+	+	-	+	-	+	ex
chr2L	22578985	22579185	201	*	6.1672	5.48258	6.6296	-0.586119	0.0197697	0.203864	26.57	63.49	44.07	110.1	135.41	51.54	0	3	-	-	-	+	+	+	Slmap
chr3L	11020122	11020322	201	*	5.33601	4.69171	5.77982	-0.583859	0.0198319	0.204226	31.63	26.46	19.44	45.25	86.83	32.75	3	3	+	+	+	+	+	+
chr3R	5270909	5271109	201	*	5.34936	4.65232	5.81733	-0.585821	0.0198491	0.204226	24.04	42.33	9.07	64.85	65.12	39.19	1	1	-	+	-	-	+	-	mtd
chr3L	8600834	8601034	201	*	6.7704	6.1682	7.19399	-0.579901	0.0198509	0.204226	86.03	68.78	60.92	159.87	188.13	91.26	1	1	-	+	-	-	+	-	Nelf-E
chr2L	8083265	8083465	201	*	6.77332	6.12305	7.21993	-0.584482	0.0198585	0.204226	102.48	67.73	38.89	138.75	199.5	108.98	2	1	+	+	-	-	+	-	Bsg
chr3R	3843989	3844189	201	*	4.96896	4.35453	5.39851	-0.579705	0.0199154	0.204611	22.77	24.34	14.26	42.23	54.79	29.53	2	0	-	+	+	-	-	-	CG41099
chr3L	17654190	17654390	201	*	6.01497	5.40397	6.44286	-0.5804	0.0199228	0.204611	54.4	40.21	32.41	90.49	116.81	53.68	1	2	+	-	-	+	+	-	CG7484
chr4	697164	697364	201	*	4.90359	4.23851	5.35708	-0.584019	0.0199446	0.204674	10.12	17.99	28.52	55.8	40.31	26.84	1	1	+	-	-	-	+	-	ey
chr3L	14999505	14999705	201	*	4.93177	4.32299	5.35856	-0.5791	0.0199617	0.204674	24.04	24.34	11.67	40.72	49.62	32.75	1	1	+	-	-	-	+	-	Prosbeta2
chr2R	7674290	7674490	201	*	5.10204	4.46773	5.54113	-0.581541	0.0199724	0.204674	20.24	25.4	20.74	48.26	65.12	26.31	0	2	-	-	-	+	+	-	mRpL52
chr2R	21090908	21091108	201	*	5.15087	4.55818	5.56976	-0.576251	0.0199952	0.204674	17.71	29.63	23.33	51.28	56.85	34.36	2	1	-	+	+	-	-	+	Rbpn-5
chr3R	21224310	21224510	201	*	5.64765	5.05209	6.06795	-0.578215	0.019996	0.204674	41.75	37.04	20.74	60.33	89.93	51	2	3	-	+	+	+	+	+	CG3337
chr3L	22461005	22461205	201	*	6.28144	5.51267	6.78028	-0.584255	0.0200298	0.204785	70.85	51.85	14.26	132.72	138.52	58.52	1	1	+	-	-	-	+	-	laza
chr2L	12091940	12092140	201	*	5.70011	5.05662	6.14355	-0.58259	0.0200427	0.204785	43.02	41.27	15.56	75.41	88.9	47.78	0	2	-	-	-	+	-	+	Pex19
chr3R	14748926	14749126	201	*	5.05649	4.27044	5.56245	-0.583872	0.0200566	0.204785	25.3	22.22	10.37	51.28	75.46	15.03	1	2	-	+	-	-	+	+	smp-30
chr3R	28600268	28600468	201	*	6.35406	5.76792	6.76968	-0.577	0.0200607	0.204785	70.85	55.03	37.59	105.57	137.48	84.28	0	2	-	-	-	+	+	-	Hrb98DE
chr3R	9593807	9594007	201	*	4.89638	4.32616	5.30399	-0.574284	0.0200819	0.204865	24.04	17.99	18.15	39.21	45.48	33.82	0	2	-	-	-	-	+	+	bocks
chr2L	20094055	20094255	201	*	5.80643	5.25561	6.20408	-0.570879	0.0201185	0.204882	41.75	39.15	33.7	63.34	97.17	60.66	1	1	+	-	-	-	-	+	CG10747
chr2L	1119274	1119474	201	*	5.36708	4.72788	5.80848	-0.582073	0.0201249	0.204882	43.02	22.22	14.26	64.85	64.09	39.19	2	3	+	+	-	+	+	+	Pino
chr3L	9511811	9512011	201	*	5.45717	4.81224	5.90129	-0.581895	0.0201257	0.204882	29.1	37.04	18.15	64.85	80.63	33.82	1	1	-	+	-	-	+	-	RpS9
chr3R	16004108	16004308	201	*	4.9561	4.38944	5.3619	-0.573423	0.0201387	0.204882	24.04	23.28	15.56	37.7	47.55	38.12	1	2	+	-	-	+	+	-
chr3L	11261717	11261917	201	*	5.59324	4.90461	6.05744	-0.584642	0.0201508	0.204882	53.14	21.16	15.56	64.85	92	42.95	1	3	-	+	-	+	+	+
chr3R	25179860	25180060	201	*	5.58024	4.85873	6.059	-0.584692	0.0201762	0.204947	48.08	16.93	22.04	76.92	93.03	30.06	3	3	+	+	+	+	+	+	lobo
chr3R	3846624	3846824	201	*	6.11388	5.44314	6.56997	-0.583792	0.0201841	0.204947	60.73	41.27	28.52	110.1	127.15	47.78	1	2	-	+	-	-	+	+	CG41099
chr3L	9072346	9072546	201	*	5.42937	4.86776	5.83259	-0.572161	0.0202013	0.204986	29.1	33.86	24.63	48.26	75.46	47.24	2	3	+	+	-	+	+	+	teq
chr2L	16656994	16657194	201	*	5.29908	4.7116	5.71538	-0.576413	0.0202244	0.205061	26.57	22.22	29.81	48.26	73.39	35.97	2	3	+	+	-	+	+	+	mtgo
chr3R	7473665	7473865	201	*	6.69449	6.04094	7.14264	-0.582806	0.020256	0.205061	89.83	57.14	50.55	153.84	193.3	76.77	1	3	-	+	-	+	+	+	FBgn0012000
chr3L	18593678	18593878	201	*	6.83045	6.09685	7.31444	-0.584064	0.0202605	0.205061	25.3	121.7	58.33	123.67	178.83	175.01	2	0	+	+	-	-	-	-	term
chr2R	18300103	18300303	201	*	6.59808	5.7239	7.13854	-0.575063	0.0202714	0.205061	40.49	109	9.07	123.67	138.52	160.52	1	2	+	-	-	-	+	+	CG18540
chr3R	27194208	27194408	201	*	6.01563	5.38564	6.45266	-0.580732	0.0202892	0.205061	51.87	47.62	25.93	84.46	123.01	55.3	1	1	-	+	-	-	+	-	Ser
chr3R	4479116	4479316	201	*	6.15889	5.42089	6.64476	-0.583904	0.0202894	0.205061	64.52	49.74	14.26	101.05	139.55	59.59	1	3	-	+	-	+	+	+	CG14651
chr3L	4134446	4134646	201	*	6.12823	5.4203	6.60103	-0.584008	0.0203267	0.205092	78.44	25.4	24.63	111.61	116.81	62.81	1	2	-	-	+	-	+	+	ens
chr2R	16389849	16390049	201	*	4.87692	5.27386	4.32748	0.576014	0.0203371	0.205092	40.49	32.81	42.78	25.64	21.71	12.88	3	3	+	+	+	+	+	+	Sema2b
chr2R	3003372	3003572	201	*	6.18813	5.65813	6.57488	-0.565636	0.0203432	0.205092	40.49	53.97	57.04	93.51	103.37	89.12	1	1	-	+	-	-	+	-
chr2R	6635947	6636147	201	*	5.73424	5.1246	6.16146	-0.578542	0.0203543	0.205092	49.34	30.69	24.63	72.39	95.1	47.24	2	2	+	+	-	+	+	-	Trap1
chr3R	9768298	9768498	201	*	5.65989	4.99817	6.11183	-0.582539	0.0203598	0.205092	41.75	35.98	18.15	63.34	104.4	39.73	2	3	+	+	-	+	+	+	MED6
chr2L	12483044	12483244	201	*	5.82841	5.15687	6.28486	-0.582877	0.0203831	0.205143	53.14	37.04	16.85	87.47	100.27	46.17	2	2	-	+	+	-	+	+	bun
chr2R	8655819	8656019	201	*	6.7914	6.20248	7.20841	-0.575964	0.0203983	0.205143	78.44	98.42	44.07	153.84	154.02	135.82	1	3	-	+	-	+	+	+	ptc
chr3R	29086969	29087169	201	*	6.04184	5.36562	6.50044	-0.583221	0.0204071	0.205143	54.4	55.03	14.26	66.36	106.47	98.78	0	2	-	-	-	+	+	-	CG11873
chr3L	10860134	10860334	201	*	6.63095	5.89588	7.11556	-0.583157	0.0204294	0.205143	106.28	52.91	19.44	131.21	159.19	125.62	3	2	+	+	+	+	-	+	tna
chr2L	89249	89449	201	*	5.57584	4.85642	6.05368	-0.583459	0.0204412	0.205143	21.51	55.03	10.37	79.93	65.12	54.22	1	3	-	+	-	+	+	+	net
chr3L	23522187	23522387	201	*	7.57447	6.93031	8.01821	-0.581608	0.0204535	0.205143	73.38	94.18	198.33	257.9	314.25	205.61	1	2	+	-	-	-	+	+
chr2R	24727620	24727820	201	*	6.34066	5.52834	6.85722	-0.579202	0.0204591	0.205143	88.56	31.75	18.15	113.11	177.8	56.91	2	3	+	+	-	+	+	+	Mid1
chr2L	431000	431200	201	*	6.3979	5.60315	6.90741	-0.580384	0.020474	0.205158	84.77	45.5	15.56	110.1	184	66.03	1	1	-	+	-	-	-	+	ex
chr2R	9114190	9114390	201	*	5.25618	4.67715	5.66825	-0.57391	0.0204949	0.205232	20.24	25.4	31.11	46.75	68.22	37.58	1	3	+	-	-	+	+	+	Su(var)2-10
chr2L	5789397	5789597	201	*	5.72263	4.96593	6.21643	-0.582331	0.0205409	0.205441	35.43	51.85	6.48	78.43	90.97	53.68	1	3	-	-	+	+	+	+	CG9171
chr3L	7948001	7948201	201	*	6.3059	5.6696	6.74593	-0.580537	0.0205428	0.205441	78.44	44.45	29.81	104.06	139.55	78.38	1	2	+	-	-	-	+	+	exex
chr3L	19870982	19871182	201	*	5.99666	5.41264	6.41122	-0.574576	0.0206081	0.205598	61.99	35.98	29.81	88.98	99.24	67.11	1	1	-	+	-	-	-	+	Usp32
chr3R	16413816	16414016	201	*	5.77653	4.95766	6.29568	-0.577846	0.0206081	0.205598	65.79	10.58	16.85	92	102.34	41.34	2	3	+	+	-	+	+	+
chr2L	9377871	9378071	201	*	4.99507	5.40362	4.42299	0.572228	0.0206136	0.205598	55.67	40.21	31.11	22.62	17.57	24.16	2	3	-	+	+	+	+	+	Shawl
chr3L	1546830	1547030	201	*	6.0219	5.32535	6.48966	-0.582534	0.0206153	0.205598	59.46	46.56	14.26	104.06	106.47	59.05	2	3	+	+	-	+	+	+	Pcyt1
chr2L	2897217	2897417	201	*	5.83855	5.20077	6.27929	-0.580165	0.0206272	0.205598	53.14	33.86	23.33	69.38	113.71	49.93	1	2	+	-	-	-	+	+	lilli
chr3R	6755504	6755704	201	*	6.86372	6.21094	7.3115	-0.581237	0.0206394	0.205598	34.16	109	79.07	146.29	136.45	193.8	1	2	-	+	-	-	+	+	zen
chr3R	14513563	14513763	201	*	5.01628	4.3569	5.46714	-0.580611	0.0206623	0.205692	24.04	17.99	19.44	51.28	59.95	21.47	1	1	-	+	-	-	+	-	HtrA2
chr2L	4578143	4578343	201	*	4.90411	4.21277	5.36953	-0.581429	0.0207054	0.205905	16.45	27.51	11.67	48.26	53.75	22.01	2	3	+	+	-	+	+	+	HP6
chr2L	13245009	13245209	201	*	5.66749	5.11019	6.06849	-0.57054	0.0207132	0.205905	44.28	24.34	35	63.34	82.7	55.3	2	3	+	+	-	+	+	+	FBgn0003935
chrX	7933617	7933817	201	*	4.83447	4.14742	5.29796	-0.581761	0.0207242	0.205905	31.63	13.76	7.78	48.26	42.38	27.38	2	1	+	+	-	-	-	+	RpS14a
chr3R	13842597	13842797	201	*	5.14634	4.45479	5.61186	-0.581527	0.0207418	0.205945	30.36	21.16	14.26	69.38	54.79	22.55	2	3	-	+	+	+	+	+	CG31495
chr2R	22411685	22411885	201	*	5.53729	4.9126	5.97178	-0.578153	0.0207862	0.206209	46.81	25.4	18.15	69.38	76.49	42.41	1	1	+	-	-	-	-	+	qkr58E-3
chr2R	16295967	16296167	201	*	5.82445	5.1829	6.26697	-0.579544	0.0207954	0.206209	34.16	59.26	15.56	69.38	81.66	79.99	1	3	-	-	+	+	+	+	CG7747
chr2R	23977168	23977368	201	*	5.48056	4.85108	5.91735	-0.578296	0.0208302	0.20641	36.69	31.75	18.15	54.29	88.9	38.12	1	1	-	+	-	-	+	-	Sox14
chr2R	5935186	5935386	201	*	5.23226	4.56482	5.68683	-0.580218	0.0208428	0.20641	22.77	39.15	9.07	52.79	62.02	39.73	1	2	+	-	-	-	+	+	FBgn0264957
chr3L	1404655	1404855	201	*	5.69862	5.05756	6.14091	-0.578484	0.0208708	0.206483	25.3	48.68	25.93	79.93	90.97	40.8	2	0	+	+	-	-	-	-	Ptp61F
chr2R	3501183	3501383	201	*	6.98492	6.42391	7.38782	-0.569767	0.0208773	0.206483	68.32	103.71	85.55	168.92	204.67	128.84	1	1	-	+	-	-	+	-
chr3R	23782528	23782728	201	*	6.5262	5.75746	7.02504	-0.579342	0.0209683	0.207102	89.83	58.2	14.26	125.18	171.59	93.95	1	3	+	-	-	+	+	+	mbc
chr3R	19403327	19403527	201	*	5.97191	5.34556	6.4072	-0.577465	0.0209851	0.207102	58.2	39.15	24.63	96.52	104.4	53.68	2	3	+	+	-	+	+	+	CG5316
chr3L	15094661	15094861	201	*	6.25346	5.61091	6.69645	-0.579079	0.0209861	0.207102	72.12	43.39	31.11	92	149.89	69.25	2	0	-	+	+	-	-	-	GlyRS
chr3L	26569561	26569761	201	*	5.9102	5.39001	6.29173	-0.560847	0.0209985	0.207102	41.75	41.27	42.78	76.92	89.93	68.18	2	3	+	+	-	+	+	+
chr2L	1157508	1157708	201	*	5.3663	4.78587	5.77907	-0.570979	0.0210268	0.207102	34.16	31.75	16.85	61.84	59.95	42.95	1	1	+	-	-	-	-	+	Tango14
chr3R	6426192	6426392	201	*	5.97095	5.40495	6.37641	-0.569202	0.0210333	0.207102	45.55	46.56	35	90.49	101.3	57.44	3	3	+	+	+	+	+	+	gpp
chr2L	2999758	2999958	201	*	5.74365	5.16442	6.15581	-0.572596	0.0210424	0.207102	44.28	41.27	22.04	54.29	93.03	66.57	2	3	+	+	-	+	+	+	Ccdc85
chr2L	7247489	7247689	201	*	5.13453	4.53732	5.55565	-0.573985	0.0210486	0.207102	20.24	33.86	15.56	37.7	60.99	42.41	3	3	+	+	+	+	+	+	Ndae1
chr3L	7133768	7133968	201	*	5.48442	4.7919	5.95037	-0.580357	0.0210783	0.207147	40.49	17.99	24.63	73.9	84.76	26.84	1	1	+	-	-	-	+	-	melt
chr2L	19166102	19166302	201	*	6.3709	5.74766	6.8047	-0.577326	0.0210804	0.207147	72.12	59.26	29.81	88.98	152.99	93.41	2	3	+	+	-	+	+	+	brat
chr3R	23118328	23118528	201	*	5.48996	4.85362	5.93001	-0.577587	0.0211195	0.207232	45.55	24.34	16.85	72.39	71.33	39.19	1	1	+	-	-	+	-	-	Rassf
chr2R	16186962	16187162	201	*	5.61324	4.91977	6.07961	-0.58019	0.0211287	0.207232	46.81	34.92	9.07	58.82	92	52.07	1	1	+	-	-	+	-	-	CG8441
chr2R	10601236	10601436	201	*	5.30761	4.70717	5.73032	-0.575086	0.0211298	0.207232	41.75	15.87	20.74	54.29	62.02	42.95	1	3	-	+	-	+	+	+	psq
chr3R	24519880	24520080	201	*	5.30606	4.70092	5.73109	-0.574933	0.0211817	0.207608	40.49	23.28	14.26	51.28	65.12	42.95	0	2	-	-	-	-	+	+	Pp1alpha-96A
chr2R	14964451	14964651	201	*	5.52393	4.96657	5.92496	-0.569239	0.0212136	0.207726	45.55	27.51	20.74	54.29	64.09	63.88	1	1	+	-	-	-	+	-	ckn
chr3R	16822152	16822352	201	*	6.0117	5.42304	6.42859	-0.572911	0.0212358	0.207726	26.57	64.55	37.59	75.41	84.76	98.24	1	1	+	-	-	-	-	+	abd-A
chr2R	4593119	4593319	201	*	4.90793	4.22186	5.37098	-0.579054	0.0212434	0.207726	21.51	25.4	9.07	45.25	55.82	23.08	2	2	+	+	-	-	+	+	p120ctn
chr3L	9837202	9837402	201	*	5.44726	4.88407	5.85129	-0.567665	0.0212483	0.207726	31.63	34.92	22.04	57.31	71.33	44.56	1	1	+	-	-	-	-	+	Cdk8
chr3R	5474833	5475033	201	*	5.19374	4.48522	5.6668	-0.579576	0.0212724	0.207829	30.36	26.46	10.37	52.79	75.46	24.16	3	1	+	+	+	-	+	-	HDAC3
chr3R	13263961	13264161	201	*	5.37377	4.68983	5.83585	-0.578987	0.0212952	0.207918	30.36	32.81	14.26	63.34	80.63	27.38	1	3	-	+	-	+	+	+	Su(var)3-7
chrX	7936133	7936333	201	*	5.59656	4.90128	6.06374	-0.579351	0.0213201	0.207919	51.87	22.22	15.56	64.85	97.17	38.65	1	3	-	+	-	+	+	+	RpS14a
chr4	660542	660742	201	*	6.75805	6.20186	7.15849	-0.567055	0.0213226	0.207919	68.32	94.18	58.33	152.33	158.16	118.11	2	3	-	+	+	+	+	+	Slip1
chr3R	12691369	12691569	201	*	5.64254	4.98892	6.09073	-0.577457	0.0213487	0.208041	43.02	32.81	19.44	92	76.49	35.97	3	3	+	+	+	+	+	+	kar
chr2L	7890801	7891001	201	*	5.74147	5.07711	6.19462	-0.578136	0.0213783	0.208084	43.02	34.92	23.33	79.93	105.44	34.36	2	1	+	+	-	-	+	-	Spn28Da
chr3R	18075285	18075485	201	*	5.70709	5.02231	6.16956	-0.578855	0.0213807	0.208084	26.57	59.26	11.67	66.36	74.43	75.16	0	2	-	-	-	+	-	+
chr3R	6763236	6763436	201	*	6.05594	5.36697	6.52029	-0.578875	0.0213971	0.208084	65.79	35.98	22.04	125.18	100.27	49.93	3	3	+	+	+	+	+	+	Ama
chr2R	16730664	16730864	201	*	5.22996	4.67622	5.62914	-0.566947	0.0214191	0.208084	26.57	30.69	19.44	39.21	62.02	47.24	1	3	-	+	-	+	+	+	Pgant9
chr2L	22153301	22153501	201	*	5.18407	4.5831	5.60705	-0.573944	0.0214214	0.208084	35.43	22.22	14.26	57.31	33.08	55.83	2	3	+	+	-	+	+	+	CG42748
chr3R	25982817	25983017	201	*	5.98266	5.31688	6.43646	-0.577879	0.0214636	0.208266	49.34	50.79	19.44	90.49	118.88	50.46	2	0	+	+	-	-	-	-	Nf1
chr3R	17079835	17080035	201	*	5.73065	5.18885	6.12361	-0.564283	0.0214675	0.208266	26.57	46.56	36.3	60.33	79.59	69.25	1	3	+	-	-	+	+	+	Keap1
chr3L	6979468	6979668	201	*	6.05433	5.45277	6.4776	-0.573333	0.0215225	0.208445	53.14	49.74	28.52	69.38	128.18	69.79	2	3	+	+	-	+	+	+	Galphai
chr2L	10413819	10414019	201	*	6.99529	6.34015	7.44418	-0.577401	0.0215288	0.208445	98.68	101.59	42.78	158.36	247.05	117.03	2	2	+	+	-	-	+	+	CG5355
chr3R	4599732	4599932	201	*	5.40377	4.62868	5.90523	-0.577	0.0215349	0.208445	26.57	35.98	11.67	66.36	93.03	20.4	1	1	+	-	-	-	-	+	FBgn0265376
chr3L	7361128	7361328	201	*	5.34701	4.71671	5.78419	-0.575832	0.0215493	0.208445	44.28	19.05	15.56	55.8	69.26	40.26	2	3	+	+	-	+	+	+	pst
chr2L	21573272	21573472	201	*	6.24282	5.6331	6.67008	-0.573297	0.0215735	0.208445	44.28	70.9	33.7	110.1	125.08	70.33	3	3	+	+	+	+	+	+	Lamp1
chr3L	25299519	25299719	201	*	5.93446	5.34777	6.35036	-0.571698	0.0215793	0.208445	21.51	42.33	58.33	73.9	93.03	77.84	3	3	+	+	+	+	+	+	lovit
chr2R	23890167	23890367	201	*	5.48444	4.91657	5.89086	-0.567689	0.0215816	0.208445	36.69	25.4	28.52	64.85	72.36	40.8	1	1	+	-	-	-	-	+	DCP1
chr3R	28340256	28340456	201	*	5.8106	5.16771	6.25376	-0.576234	0.0216017	0.208507	49.34	33.86	24.63	75.41	111.64	41.87	3	3	+	+	+	+	+	+	Gfat2
chr2L	18702997	18703197	201	*	6.09937	5.47731	6.53261	-0.574375	0.0216402	0.208587	51.87	57.14	24.63	95.02	119.91	62.81	3	3	+	+	+	+	+	+	CG10376
chr2L	11074280	11074480	201	*	5.33347	4.7478	5.74886	-0.571333	0.0216488	0.208587	30.36	35.98	14.26	49.77	44.45	67.11	0	2	-	-	-	-	+	+	CG43725
chr3R	6930544	6930744	201	*	5.02881	4.47915	5.42587	-0.564782	0.0216564	0.208587	27.83	22.22	16.85	45.25	42.38	41.34	2	1	-	+	+	-	+	-	Antp
chr2L	17751129	17751329	201	*	5.10246	4.43001	5.55933	-0.577002	0.0216648	0.208587	32.89	20.11	11.67	57.31	58.92	25.23	1	2	+	-	-	+	+	-	CadN
chr3L	5592180	5592380	201	*	6.27891	5.65121	6.71484	-0.574885	0.0217125	0.208677	29.1	81.48	40.18	87.47	124.04	103.61	3	3	+	+	+	+	+	+	spo
chr3R	5299094	5299294	201	*	5.34449	4.7819	5.74821	-0.56553	0.0217134	0.208677	24.04	33.86	24.63	54.29	66.16	40.8	0	2	-	-	-	-	+	+	mtd
chr3L	5583295	5583495	201	*	5.74537	5.17269	6.15423	-0.568096	0.0217376	0.208677	34.16	33.86	40.18	72.39	95.1	46.17	3	3	+	+	+	+	+	+	l(3)psg2
chr2L	20333195	20333395	201	*	7.22515	6.47144	7.71769	-0.576037	0.021749	0.208677	160.68	26.46	79.07	211.15	235.68	184.68	3	3	+	+	+	+	+	+	spir
chr3L	20785835	20786035	201	*	5.34935	4.79096	5.75091	-0.564923	0.0217726	0.208677	26.57	37.04	19.44	52.79	60.99	47.78	1	2	-	+	-	-	+	+	CG11399
chr2R	12173769	12173969	201	*	5.94783	5.31632	6.38558	-0.574982	0.0217784	0.208677	61.99	38.1	19.44	79.93	106.47	64.42	2	3	+	+	-	+	+	+	CCT5
chrX	1947409	1947609	201	*	5.24497	4.54869	5.71261	-0.577143	0.0217789	0.208677	21.51	37.04	11.67	49.77	78.56	28.99	3	3	+	+	+	+	+	+	Hr4
chr3R	14031460	14031660	201	*	5.12926	4.55389	5.53948	-0.567835	0.021794	0.208677	31.63	23.28	15.56	49.77	52.72	37.04	1	1	+	-	-	-	+	-	Cyp6d5
chr3R	16655728	16655928	201	*	5.50803	4.88318	5.9426	-0.573808	0.0217973	0.208677	39.22	28.57	20.74	64.85	84.76	34.89	1	1	-	+	-	-	+	-	modSP
chr3L	1501771	1501971	201	*	5.45604	4.91017	5.85112	-0.565023	0.0218208	0.208747	37.96	32.81	19.44	48.26	59.95	64.96	1	1	-	+	-	-	-	+	hfp
chr3L	17802230	17802430	201	*	6.84283	6.20179	7.28511	-0.575194	0.0218571	0.208747	78.44	93.12	49.26	152.33	224.31	91.26	1	1	-	+	-	-	-	+	NUCB1
chr4	659358	659558	201	*	5.40986	4.81755	5.82857	-0.56971	0.0218627	0.208747	16.45	37.04	31.11	58.82	69.26	42.41	2	3	+	+	-	+	+	+	gw
chrX	636990	637190	201	*	6.09755	5.39983	6.56583	-0.576897	0.0218683	0.208747	53.14	59.26	14.26	90.49	127.15	66.57	0	2	-	-	-	-	+	+	su(sable)
chr3L	1964069	1964269	201	*	4.88616	4.23955	5.33105	-0.57514	0.0218824	0.208747	27.83	15.87	12.96	39.21	56.85	24.69	1	1	+	-	-	-	-	+	SCOT
chr3L	16773308	16773508	201	*	6.93928	6.39003	7.33613	-0.564179	0.0218868	0.208747	75.91	112.17	63.52	156.85	169.53	158.37	2	1	+	+	-	-	-	+	Nrt
chr2L	2900522	2900722	201	*	4.8877	4.32118	5.29343	-0.567266	0.0219708	0.209412	22.77	19.05	18.15	33.18	50.65	33.82	2	3	+	+	-	+	+	+	lilli
chr3R	11412487	11412687	201	*	5.73062	5.08288	6.17604	-0.574658	0.0219996	0.209412	40.49	39.15	22.04	73.9	105.44	37.58	1	1	+	-	-	-	-	+	Ranbp9
chr2L	11446175	11446375	201	*	6.12687	5.49833	6.56322	-0.573816	0.0220082	0.209412	58.2	59.26	18.15	92	96.13	95.56	3	3	+	+	+	+	+	+	salm
chr2R	4836901	4837101	201	*	5.6521	5.09182	6.05464	-0.563765	0.0220115	0.209412	34.16	37.04	31.11	82.95	70.29	46.17	1	3	-	+	-	+	+	+
chr4	570400	570600	201	*	5.10124	4.5558	5.49611	-0.563674	0.0220419	0.20957	27.83	23.28	19.44	37.7	55.82	41.87	1	1	+	-	-	-	-	+	ND-49
chr2R	20327173	20327373	201	*	6.18776	5.59856	6.60491	-0.569336	0.0220837	0.209572	59.46	56.09	29.81	96.52	123.01	72.47	3	3	+	+	+	+	+	+	MED8
chr2R	14959066	14959266	201	*	5.31932	4.69526	5.75352	-0.573593	0.0220921	0.209572	44.28	12.7	20.74	55.8	62.02	44.02	1	3	-	+	-	+	+	+	aPKC
chr2R	6621087	6621287	201	*	5.38338	4.76931	5.81276	-0.571935	0.0221019	0.209572	39.22	29.63	12.96	52.79	72.36	43.48	0	2	-	-	-	-	+	+	jing
chr4	59079	59279	201	*	7.26168	6.69932	7.66528	-0.565746	0.0221065	0.209572	105.01	135.45	71.29	191.54	241.89	175.55	1	2	-	+	-	-	+	+	ci
chr2R	3860532	3860732	201	*	5.8647	5.28683	6.27618	-0.567251	0.0221213	0.209572	29.1	58.2	29.81	73.9	90.97	67.64	1	2	+	-	-	-	+	+
chrX	7938048	7938248	201	*	5.55673	4.92891	5.99273	-0.573471	0.0221246	0.209572	48.08	26.46	16.85	52.79	89.93	48.32	2	3	+	+	-	+	+	+	Ubr3
chrX	7728862	7729062	201	*	4.85582	4.12877	5.33698	-0.575352	0.0221743	0.209912	30.36	16.93	5.19	39.21	57.89	24.16	2	3	+	+	-	+	+	+	NELF-B
chr4	1051348	1051548	201	*	6.81432	6.20645	7.24069	-0.571134	0.0222083	0.210103	78.44	89.95	53.15	149.31	207.77	96.63	3	1	+	+	+	-	-	+	CaMKII
chr3L	10858818	10859018	201	*	6.01786	5.48188	6.40777	-0.559988	0.0223208	0.210473	44.28	56.09	33.7	88.98	73.39	92.34	3	3	+	+	+	+	+	+	tna
chr2R	22415438	22415638	201	*	5.79073	5.21822	6.1995	-0.565964	0.0223223	0.210473	40.49	46.56	24.63	66.36	96.13	57.98	2	3	-	+	+	+	+	+	qkr58E-2
chr2L	15009878	15010078	201	*	5.59195	4.90706	6.05447	-0.574739	0.0223257	0.210473	40.49	39.15	10.37	61.84	94.07	43.48	1	2	+	-	-	+	+	-	l(2)35Be
chr3L	14031597	14031797	201	*	6.00342	5.43073	6.41228	-0.565318	0.0223307	0.210473	48.08	47.62	33.7	105.57	93.03	56.91	1	3	-	+	-	+	+	+	CG6650
chr2R	13593531	13593731	201	*	5.01386	4.4639	5.41107	-0.562855	0.0223486	0.210473	17.71	26.46	22.04	36.2	50.65	40.8	0	2	-	-	-	-	+	+	CG6191
chrX	12660189	12660389	201	*	5.33982	4.62177	5.81706	-0.574666	0.0223621	0.210473	36.69	30.69	6.48	58.82	76.49	33.82	3	3	+	+	+	+	+	+	Tis11
chr2R	17005343	17005543	201	*	5.62563	5.00899	6.05625	-0.57123	0.0223653	0.210473	46.81	26.46	23.33	67.87	90.97	40.8	0	3	-	-	-	+	+	+	NiPp1
chrX	10472664	10472864	201	*	5.45903	4.83605	5.8927	-0.571021	0.0223696	0.210473	29.1	42.33	14.26	60.33	74.43	43.48	1	1	-	+	-	-	-	+	CG2889
chr3L	18228718	18228918	201	*	5.93076	5.25362	6.38977	-0.574323	0.0223717	0.210473	41.75	57.14	15.56	93.51	105.44	52.61	0	2	-	-	-	-	+	+	FBgn0267597
chr3R	17082225	17082425	201	*	6.75923	6.1888	7.16695	-0.56623	0.0223867	0.210485	48.08	99.47	71.29	123.67	157.12	150.32	1	3	-	+	-	+	+	+	Keap1
chr3R	13647754	13647954	201	*	5.18146	4.6372	5.57571	-0.560094	0.0224413	0.210687	29.1	22.22	23.33	55.8	47.55	39.73	2	2	+	+	-	-	+	+	rin
chr2L	14233408	14233608	201	*	6.02182	5.27454	6.51165	-0.573549	0.0224425	0.210687	40.49	61.38	14.26	87.47	139.55	46.71	1	3	-	+	-	+	+	+	Dyrk2
chr3L	19922715	19922915	201	*	6.06902	5.51031	6.47075	-0.563055	0.0225017	0.210687	45.55	61.38	29.81	90.49	96.13	79.45	2	2	+	+	-	-	+	+	Su(z)12
chr3L	4103010	4103210	201	*	5.59374	5.03853	5.99368	-0.56339	0.0225071	0.210687	21.51	43.39	33.7	51.28	75.46	64.42	2	3	+	+	-	+	+	+	CG14995
chr3R	5056064	5056264	201	*	6.51341	5.83648	6.97232	-0.573896	0.0225137	0.210687	65.79	83.6	22.04	107.08	163.32	106.3	0	3	-	-	-	+	+	+	FBgn0267148
chr3R	4641474	4641674	201	*	5.47296	4.90773	5.87803	-0.564508	0.0225184	0.210687	29.1	40.21	20.74	46.75	75.46	54.22	1	1	+	-	-	-	-	+	CG9775
chr3R	7123794	7123994	201	*	6.85172	6.11888	7.33537	-0.573327	0.0225386	0.210687	101.22	87.83	19.44	141.77	202.61	140.12	0	2	-	-	-	-	+	+	CG10098
chr3L	16712495	16712695	201	*	6.67033	6.06723	7.09435	-0.569507	0.0225708	0.210687	94.89	63.49	42.78	132.72	174.7	102.54	3	3	+	+	+	+	+	+	Dab
chr2L	278608	278808	201	*	6.03475	5.38564	6.48082	-0.572499	0.0225844	0.210687	30.36	73.02	22.04	81.44	105.44	81.06	0	2	-	-	-	-	+	+	smo
chr3R	5570984	5571184	201	*	5.64761	5.04562	6.07108	-0.569237	0.0225955	0.210687	40.49	39.15	19.44	49.77	97.17	54.76	3	3	+	+	+	+	+	+	CRMP
chr2L	21627582	21627782	201	*	5.42634	4.86079	5.83157	-0.565421	0.0226016	0.210687	43.02	16.93	27.22	61.84	54.79	54.22	1	1	+	-	-	-	-	+	Df31
chr3L	11220637	11220837	201	*	5.01841	4.45683	5.42161	-0.564305	0.0226174	0.210687	26.57	21.16	18.15	34.69	56.85	37.04	1	1	+	-	-	-	-	+	CG42671
chr3L	8455302	8455502	201	*	6.05041	5.4523	6.47198	-0.568224	0.0226175	0.210687	29.1	69.84	32.41	85.97	98.2	82.14	1	1	-	-	+	-	+	-	Gug
chrX	3780933	3781133	201	*	6.63994	5.89947	7.12687	-0.572669	0.0226311	0.210687	86.03	76.19	16.85	120.66	190.2	108.44	2	2	-	+	+	-	+	+	Tlk
chr3L	11205734	11205934	201	*	6.04895	5.49681	6.4473	-0.562112	0.0226353	0.210687	60.73	42.33	32.41	87.47	101.3	73.01	1	2	-	+	-	-	+	+	Plod
chr3L	2483199	2483399	201	*	5.89963	5.34306	6.30026	-0.563693	0.0226392	0.210687	36.69	53.97	31.11	55.8	90.97	89.65	1	2	-	+	-	+	-	+	Svil
chr3R	8277872	8278072	201	*	7.42238	6.90196	7.80402	-0.555642	0.0226432	0.210687	125.25	125.93	107.59	232.26	260.49	177.7	2	3	+	+	-	+	+	+	ato
chr2R	12760756	12760956	201	*	5.59639	4.95426	6.03919	-0.571632	0.0226696	0.210803	39.22	31.75	22.04	67.87	96.13	33.28	1	1	+	-	-	-	+	-	CG12374
chr2R	13447997	13448197	201	*	6.73471	6.17617	7.13635	-0.562868	0.02272	0.210967	63.26	100.53	53.15	135.74	147.82	138.51	1	2	+	-	-	+	+	-	cnn
chr3R	16281267	16281467	201	*	5.27074	4.66724	5.69496	-0.569148	0.0227314	0.210967	26.57	32.81	16.85	31.67	76.49	47.24	2	3	+	+	-	+	+	+	gish
chr3R	24850513	24850713	201	*	5.82897	5.21404	6.25877	-0.569748	0.0227436	0.210967	49.34	41.27	20.74	64.85	109.57	55.3	0	2	-	-	-	-	+	+	CG7006
chr2R	11397730	11397930	201	*	6.32561	5.61833	6.79812	-0.572997	0.0227486	0.210967	68.32	63.49	15.56	107.08	146.79	79.99	1	1	+	-	-	-	-	+	sprt
chr3L	5929512	5929712	201	*	6.12381	5.48002	6.56739	-0.571709	0.0227571	0.210967	55.67	61.38	16.85	87.47	110.61	86.43	2	2	+	+	-	-	+	+	CG33523
chr2L	4976924	4977124	201	*	5.54619	4.96338	5.96014	-0.565547	0.0227753	0.210967	44.28	28.57	20.74	70.88	71.33	44.56	2	3	+	+	-	+	+	+	Gmd
chr3R	6949086	6949286	201	*	5.82872	5.18656	6.27153	-0.570951	0.0227841	0.210967	37.96	51.85	19.44	90.49	95.1	46.17	0	2	-	-	-	-	+	+	Antp
chr3R	9404256	9404456	201	*	5.9241	5.38656	6.31483	-0.558182	0.0228391	0.211212	44.28	42.33	38.89	78.43	100.27	60.13	1	2	-	+	-	-	+	+	CG9356
chr3R	23992894	23993094	201	*	5.68616	5.03329	6.13399	-0.571433	0.022845	0.211212	46.81	30.69	20.74	90.49	84.76	35.43	1	3	-	+	-	+	+	+	Rab7
chr2R	23046150	23046350	201	*	7.17849	6.44639	7.66182	-0.57181	0.0228576	0.211212	155.62	76.19	29.81	152.33	251.19	204	3	3	+	+	+	+	+	+	twi
chr3R	6010122	6010322	201	*	5.55152	4.95141	5.97407	-0.567212	0.022866	0.211212	31.63	39.15	22.04	57.31	89.93	41.34	1	2	+	-	-	+	+	-	Rm62
chr3R	31194599	31194799	201	*	5.80263	5.25107	6.20066	-0.5626	0.0229111	0.211481	31.63	47.62	35	48.26	81.66	90.73	1	1	+	-	-	-	-	+	CG1544
chr3R	8669440	8669640	201	*	5.82832	5.27668	6.2264	-0.56213	0.0229229	0.211481	50.61	30.69	35	58.82	99.24	66.57	0	2	-	-	-	+	+	-	FBgn0012024
chr2L	16720575	16720775	201	*	5.35427	4.59241	5.85024	-0.570455	0.0229456	0.211563	45.55	19.05	7.78	58.82	85.8	28.45	2	2	+	+	-	-	+	+	Cyt-c-p
chr2R	13593207	13593407	201	*	6.36817	5.76133	6.79402	-0.568184	0.0229802	0.211754	72.12	58.2	32.41	104.06	148.85	79.99	0	2	-	-	-	+	+	-	CG6191
chr2R	22229418	22229618	201	*	5.51559	4.9131	5.93931	-0.56778	0.0229974	0.211761	45.55	25.4	19.44	55.8	83.73	44.56	2	3	+	-	+	+	+	+	Oatp58Dc
chr2R	14621050	14621250	201	*	5.62965	5.08725	6.02292	-0.558935	0.0230143	0.211761	43.02	31.75	27.22	61.84	80.63	52.61	2	2	+	-	+	-	+	+	Su(var)2-HP2
chr2R	24187503	24187703	201	*	6.85954	6.15551	7.33062	-0.571754	0.0230298	0.211761	125.25	61.38	27.22	143.28	199.5	140.12	3	3	+	+	+	+	+	+	ocm
chr2R	19631095	19631295	201	*	5.07469	4.51137	5.47879	-0.564085	0.0230365	0.211761	34.16	14.82	19.44	40.72	50.65	42.41	2	2	+	+	-	-	+	+	sm
chr2L	10058874	10059074	201	*	6.1368	5.50793	6.5733	-0.569583	0.0230895	0.212082	49.34	67.73	19.44	79.93	107.5	98.24	1	1	-	+	-	-	+	-	Spn31A
chr2L	295027	295227	201	*	5.50062	4.90735	5.91979	-0.566046	0.0231061	0.212082	35.43	33.86	20.74	49.77	88.9	42.95	2	3	+	+	-	+	+	+	U2af38
chr3R	12128545	12128745	201	*	7.38298	6.75907	7.81711	-0.56917	0.023122	0.212082	139.17	136.51	49.26	242.82	236.72	197.02	2	3	+	+	-	+	+	+	FBgn0011905
chr2R	17535813	17536013	201	*	6.01272	5.37952	6.45129	-0.569759	0.0231323	0.212082	59.46	43.39	22.04	69.38	128.18	64.96	1	1	-	-	+	-	+	-	eIF3b
chr2R	24775141	24775341	201	*	5.48252	4.89649	5.89809	-0.564971	0.0231507	0.212082	39.22	30.69	19.44	54.29	81.66	42.95	1	3	+	-	-	+	+	+	Eps-15
chr3R	18172659	18172859	201	*	5.33515	4.65029	5.79765	-0.571192	0.0231549	0.212082	24.04	37.04	14.26	43.74	92	31.14	1	3	+	-	-	+	+	+	wrd
chr2R	10552967	10553167	201	*	5.97777	5.36172	6.4081	-0.567949	0.0231903	0.212279	44.28	51.85	27.22	73.9	126.11	54.76	2	2	+	+	-	-	+	+
chr2R	22728582	22728782	201	*	6.23379	5.6811	6.63242	-0.560147	0.0232363	0.21251	55.67	64.55	33.7	88.98	115.77	92.87	3	3	+	+	+	+	+	+	jbug
chr3R	28336379	28336579	201	*	5.63004	4.94766	6.09142	-0.57088	0.0232434	0.21251	46.81	32.81	12.96	58.82	104.4	41.34	2	1	+	+	-	-	+	-	larp
chr3R	23758209	23758409	201	*	4.82263	4.11906	5.2935	-0.570805	0.0232656	0.212585	25.3	19.05	7.78	51.28	46.52	19.86	2	3	+	+	-	+	+	+	Hrd3
chr2R	19179114	19179314	201	*	4.9101	4.32448	5.32547	-0.562575	0.0233166	0.212923	21.51	24.34	14.26	45.25	44.45	30.6	2	3	+	+	-	+	+	+	hppy
chr2R	14434335	14434535	201	*	5.99277	5.34504	6.4382	-0.569345	0.0233616	0.213206	55.67	33.86	32.41	104.06	114.74	41.34	3	3	+	+	+	+	+	+	phyl
chr3R	6741619	6741819	201	*	5.71369	5.12727	6.12945	-0.564541	0.0233775	0.213224	46.81	24.34	33.7	72.39	92	45.63	1	3	-	+	-	+	+	+	pb
chr2R	6579009	6579209	201	*	5.41408	4.82879	5.82928	-0.565727	0.0233928	0.213236	37.96	31.75	15.56	36.2	65.12	69.25	2	2	+	+	-	-	+	+	jing
chr2R	10026774	10026974	201	*	5.2725	4.637	5.71215	-0.568386	0.0234149	0.21331	39.22	21.16	14.26	55.8	69.26	32.21	1	1	+	-	-	-	+	-	Pka-R2
chr3R	18246142	18246342	201	*	5.32701	4.7533	5.73638	-0.562413	0.0234419	0.213374	32.89	28.57	19.44	45.25	74.43	40.26	2	1	+	+	-	-	-	+	14-3-3epsilon
chr2R	20041279	20041479	201	*	6.36822	5.78553	6.78212	-0.564007	0.0234663	0.213374	64.52	69.84	31.11	90.49	132.31	107.37	2	3	+	+	-	+	+	+
chr2L	7032866	7033066	201	*	5.20327	4.6164	5.61926	-0.56438	0.0234697	0.213374	39.22	20.11	14.26	49.77	55.82	41.87	2	3	+	+	-	+	+	+	Rab30
chr2L	13219339	13219539	201	*	5.47691	4.91936	5.87804	-0.55934	0.0234834	0.213374	39.22	24.34	27.22	67.87	66.16	42.41	0	2	-	-	-	-	+	+	CG9426
chr3L	21144978	21145178	201	*	6.40873	5.76761	6.85104	-0.568586	0.0235111	0.213374	30.36	94.18	38.89	107.08	115.77	123.47	1	2	-	+	-	+	+	-	Ac78C
chr2R	24513865	24514065	201	*	5.61057	5.0369	6.01993	-0.56139	0.0235186	0.213374	30.36	48.68	19.44	66.36	69.26	59.05	0	2	-	-	-	+	+	-	Ir60b
chr2L	2814959	2815159	201	*	6.29608	5.66594	6.73319	-0.567678	0.0235222	0.213374	32.89	85.72	33.7	110.1	118.88	90.19	3	3	+	+	+	+	+	+	G6P
chr3R	24220938	24221138	201	*	6.49873	5.81799	6.95938	-0.569594	0.0235448	0.213374	48.08	95.24	25.93	129.7	155.06	88.58	3	3	+	+	+	+	+	+	twin
chr3R	27273595	27273795	201	*	5.61363	5.07124	6.0069	-0.556962	0.023548	0.213374	25.3	44.45	31.11	55.8	77.53	59.59	1	1	+	-	-	-	+	-	l(3)mbt
chr2L	6827673	6827873	201	*	5.06243	4.46901	5.48168	-0.563659	0.0235707	0.213453	32.89	17.99	15.56	57.31	42.38	34.36	2	3	+	+	-	+	+	+	sens-2
chr3R	17647519	17647719	201	*	5.76737	5.04291	6.2474	-0.568962	0.0236188	0.213465	48.08	39.15	11.67	70.88	117.84	39.19	2	3	+	-	+	+	+	+	CG14322
chrX	6261026	6261226	201	*	5.00949	4.37848	5.44701	-0.567155	0.0236362	0.213465	24.04	25.4	12.96	34.69	67.19	28.99	2	3	+	+	-	+	+	+	CG3781
chr3L	11357142	11357342	201	*	5.92582	5.31436	6.35393	-0.56531	0.0236549	0.213465	34.16	47.62	37.59	98.03	104.4	42.95	3	3	+	+	+	+	+	+
chr2L	9454462	9454662	201	*	6.19343	5.47428	6.67116	-0.568642	0.0236759	0.213465	84.77	31.75	16.85	93.51	134.38	77.84	2	0	+	+	-	-	-	-	numb
chr3R	13794617	13794817	201	*	6.16686	5.29979	6.70464	-0.558023	0.0236768	0.213465	79.71	30.69	7.78	111.61	152.99	48.32	2	1	+	-	+	-	-	+
chr4	1234037	1234237	201	*	5.39901	4.81671	5.81272	-0.561568	0.0236914	0.213465	22.77	42.33	19.44	55.8	67.19	45.63	1	1	+	-	-	-	-	+	FBgn0053653
chr2R	21646000	21646200	201	*	7.04414	6.32211	7.52312	-0.568501	0.0236919	0.213465	142.97	69.84	27.22	173.44	224.31	154.07	3	3	+	+	+	+	+	+	CG10082
chr3L	7137836	7138036	201	*	6.0879	5.41746	6.54385	-0.56883	0.0236933	0.213465	46.81	64.55	16.85	81.44	129.21	69.25	1	1	-	+	-	-	-	+	melt
chr4	993324	993524	201	*	4.87012	4.29226	5.28159	-0.563664	0.0236981	0.213465	22.77	24.34	11.67	27.15	44.45	45.1	2	2	+	+	-	-	+	+	toy
chr2L	19576827	19577027	201	*	6.0149	5.4383	6.42574	-0.56283	0.0237161	0.213468	64.52	37.04	28.52	69.38	108.54	79.99	2	0	+	+	-	-	-	-	spi
chr2R	11527869	11528069	201	*	7.14384	6.30312	7.67155	-0.560234	0.0237264	0.213468	161.94	52.91	22.04	190.03	300.81	120.79	1	2	+	-	-	-	+	+	en
chr2L	8389640	8389840	201	*	5.61745	5.02365	6.03689	-0.563631	0.0237454	0.213513	30.36	29.63	37.59	66.36	93.03	37.58	2	2	+	+	-	+	+	-	FBgn0041717
chr3L	8091738	8091938	201	*	5.07017	4.44248	5.5061	-0.565411	0.0238012	0.213673	24.04	24.34	16.85	54.29	57.89	24.16	2	2	+	+	-	-	+	+	CG7565
chr2R	14503383	14503583	201	*	5.65028	4.9963	6.09863	-0.567852	0.0238141	0.213673	46.81	35.98	12.96	64.85	95.1	45.63	2	3	+	+	-	+	+	+	Cpsf160
chr3L	21027332	21027532	201	*	5.9212	5.31188	6.34827	-0.565118	0.0238189	0.213673	46.81	52.91	19.44	70.88	107.5	66.03	2	3	+	+	-	+	+	+	skd
chr2R	20278849	20279049	201	*	5.31355	4.65073	5.76599	-0.568117	0.0238193	0.213673	39.22	17.99	18.15	57.31	78.56	27.38	2	3	+	+	-	+	+	+	CG9143
chr3L	6173278	6173478	201	*	5.11288	4.58932	5.49621	-0.556006	0.0238499	0.213822	22.77	22.22	27.22	33.18	49.62	52.61	3	3	+	+	+	+	+	+	fmt
chr2R	1365399	1365599	201	*	4.98492	4.41212	5.39384	-0.559647	0.0238653	0.213834	26.57	24.34	12.96	49.77	38.25	38.12	2	3	+	+	-	+	+	+	l(2)41Ab
chr2L	2375766	2375966	201	*	5.954	5.37902	6.36403	-0.560853	0.0238964	0.213966	56.93	38.1	29.81	92	98.2	56.91	1	1	+	-	-	-	-	+	CG3609
chrX	15941655	15941855	201	*	5.91791	5.06624	6.44983	-0.55956	0.0239081	0.213966	12.65	76.19	11.67	82.95	125.08	54.22	2	1	-	+	+	-	+	-	CG8924
chr2L	22168155	22168355	201	*	5.79124	5.25068	6.18355	-0.554264	0.02396	0.214201	32.89	47.62	33.7	76.92	84.76	56.37	2	3	+	+	-	+	+	+	Clamp
chr2R	24411695	24411895	201	*	5.57598	4.93905	6.01631	-0.566492	0.0239784	0.214201	45.55	29.63	16.85	58.82	95.1	40.26	2	3	+	+	-	+	+	+	SerT
chr3L	23249257	23249457	201	*	5.57186	4.9974	5.98162	-0.559953	0.0240119	0.214201	34.16	37.04	24.63	60.33	86.83	42.41	1	1	+	-	-	-	-	+	nAChRalpha4
chr3R	24031725	24031925	201	*	5.82803	5.28558	6.22133	-0.55526	0.0240176	0.214201	49.34	39.15	28.52	76.92	87.86	59.05	2	3	+	+	-	+	+	+	KrT95D
chr2R	12336631	12336831	201	*	5.86744	5.28076	6.28334	-0.561474	0.0240181	0.214201	40.49	47.62	28.52	81.44	103.37	48.85	2	3	+	+	-	+	+	+	FBgn0011877
chr2L	9963619	9963819	201	*	5.59465	5.03939	5.9946	-0.557265	0.0240293	0.214201	34.16	35.98	28.52	58.82	86.83	45.63	3	3	+	+	+	+	+	+	CG5850
chr2L	19742451	19742651	201	*	5.00314	4.27386	5.48526	-0.567389	0.0240332	0.214201	24.04	27.51	6.48	46.75	66.16	21.47	1	3	-	+	-	+	+	+	FBgn0266211
chr2R	8081246	8081446	201	*	5.27597	4.6011	5.73395	-0.567546	0.02405	0.214201	41.75	23.28	7.78	40.72	75.46	43.48	2	3	+	+	-	+	+	+	Vps28
chr3L	16381594	16381794	201	*	5.52433	4.99127	5.9127	-0.552277	0.0240609	0.214201	36.69	32.81	25.93	70.88	60.99	48.85	3	3	+	+	+	+	+	+	Agpat4
chr3R	29138507	29138707	201	*	4.85182	4.183	5.30703	-0.566746	0.0241367	0.214659	30.36	13.76	10.37	54.29	40.31	24.16	3	3	+	+	+	+	+	+	CG14512
chr2R	24034153	24034353	201	*	5.72153	5.19307	6.10747	-0.551252	0.0241977	0.214659	32.89	44.45	32.41	70.88	79.59	56.37	1	3	-	+	-	+	+	+	Chi
chr2R	22888801	22889001	201	*	6.1686	5.59943	6.57568	-0.559395	0.0242019	0.214659	56.93	44.45	44.07	90.49	132.31	63.35	3	3	+	+	+	+	+	+	YME1L
chrX	6225003	6225203	201	*	4.99174	4.38856	5.4158	-0.561608	0.0242024	0.214659	20.24	29.63	12.96	45.25	51.69	31.14	1	1	-	+	-	-	+	-	sqh
chr3R	10110125	10110325	201	*	5.72873	5.19096	6.11957	-0.553565	0.024224	0.214659	40.49	32.81	36.3	73.9	84.76	49.93	0	2	-	-	-	+	+	-	Fmr1
chr3L	10289165	10289365	201	*	5.06344	4.51844	5.45807	-0.556084	0.02425	0.214659	29.1	25.4	14.26	40.72	44.45	46.71	0	2	-	-	-	-	+	+	FBgn0267665
chr2L	867653	867853	201	*	5.98905	5.39196	6.4101	-0.562436	0.0242531	0.214659	53.14	50.79	22.04	76.92	111.64	66.57	2	0	+	+	-	-	-	-	aru
chrX	12705870	12706070	201	*	5.02394	4.39703	5.45951	-0.564267	0.02426	0.214659	20.24	22.22	20.74	42.23	66.16	23.62	1	2	-	+	-	-	+	+	CG15725
chr2R	10083590	10083790	201	*	5.0707	4.54448	5.45545	-0.552667	0.0242735	0.214659	26.57	20.11	23.33	40.72	50.65	40.26	0	2	-	-	-	-	+	+	egr
chr3R	20573631	20573831	201	*	5.84198	5.2937	6.23832	-0.556015	0.0242761	0.214659	35.43	55.03	27.22	63.34	84.76	78.38	0	2	-	-	-	-	+	+	FBgn0083039
chr3R	31936406	31936606	201	*	4.87919	4.18095	5.34769	-0.566548	0.0242977	0.214659	22.77	26.46	5.19	45.25	51.69	25.23	2	3	+	+	-	+	+	+	heph
chr2L	17267380	17267580	201	*	5.12643	4.54901	5.53768	-0.558708	0.0243189	0.214659	31.63	24.34	14.26	58.82	41.35	39.19	2	1	+	+	-	-	-	+
chr3R	10767718	10767918	201	*	5.33081	4.75851	5.73948	-0.557173	0.0243192	0.214659	25.3	33.86	22.04	64.85	58.92	36.51	1	3	-	+	-	+	+	+	TfIIFbeta
chr3L	14447469	14447669	201	*	4.92572	4.23289	5.3918	-0.566232	0.0243814	0.214659	12.65	35.98	7.78	27.15	54.79	44.02	1	2	-	-	+	-	+	+	bbg
chr3R	4641057	4641257	201	*	5.89461	5.28699	6.32085	-0.562632	0.024384	0.214659	32.89	63.49	20.74	76.92	90.97	71.94	1	1	+	-	-	-	-	+	CG9775
chr2L	10230558	10230758	201	*	5.38361	4.87218	5.76043	-0.547401	0.0243986	0.214659	27.83	32.81	27.22	55.8	55.82	51	3	3	+	+	+	+	+	+	ova
chr3L	14408816	14409016	201	*	6.3317	5.76642	6.73679	-0.557828	0.0243999	0.214659	37.96	70.9	54.44	107.08	131.28	81.6	2	3	+	+	-	+	+	+	stwl
chr2L	18666042	18666242	201	*	5.88386	5.31285	6.29187	-0.558367	0.0244097	0.214659	39.22	47.62	32.41	73.9	108.54	52.61	1	1	-	+	-	+	-	-	FBgn0086200
chr3R	9763064	9763264	201	*	5.59107	5.0277	5.99518	-0.556279	0.0244161	0.214659	27.83	40.21	29.81	70.88	77.53	42.95	2	3	+	+	-	+	+	+	CG8478
chr3R	14740728	14740928	201	*	7.03068	6.3688	7.4827	-0.565753	0.0244394	0.214659	111.34	101.59	35	180.98	230.52	125.09	3	1	+	+	+	-	-	+	eff
chr2R	19456579	19456779	201	*	5.3235	4.73524	5.74019	-0.5614	0.0244653	0.214659	40.49	26.46	12.96	43.74	66.16	50.46	3	3	+	+	+	+	+	+	mei-W68
chr2L	4042920	4043120	201	*	4.87714	4.2981	5.28921	-0.558186	0.0244653	0.214659	22.77	23.28	12.96	48.26	33.08	35.97	2	3	+	+	-	+	+	+	ed
chr3L	3250346	3250546	201	*	4.81477	4.14869	5.26872	-0.565193	0.0244724	0.214659	18.98	26.46	7.78	37.7	52.72	25.23	3	3	+	+	+	+	+	+	FBgn0262368
chr2R	24098117	24098317	201	*	5.15657	4.5989	5.55777	-0.555564	0.0244761	0.214659	21.51	31.75	19.44	43.74	58.92	38.65	3	3	+	+	+	+	+	+	gek
chr2R	10100844	10101044	201	*	6.57082	5.81796	7.063	-0.563794	0.0244768	0.214659	106.28	37.04	25.93	132.72	194.34	74.08	2	3	+	+	-	+	+	+	14-3-3zeta
chr2R	3941628	3941828	201	*	5.73105	5.15485	6.14168	-0.558232	0.0244786	0.214659	29.1	51.85	25.93	73.9	84.76	53.15	0	3	-	-	-	+	+	+	uex
chr3R	26023351	26023551	201	*	6.88924	6.35111	7.28028	-0.553628	0.0244969	0.214696	91.09	94.18	59.63	141.77	186.07	138.51	1	2	-	+	-	-	+	+	FBgn0263653
chr3R	15225413	15225613	201	*	6.91418	6.32485	7.3314	-0.560929	0.0245522	0.215058	105.01	71.96	63.52	147.8	226.38	108.98	3	3	+	+	+	+	+	+	Rpb7
chrX	17878071	17878271	201	*	5.07256	4.47653	5.4931	-0.55934	0.0245975	0.215331	17.71	29.63	19.44	49.77	55.82	29.53	2	3	+	+	-	+	+	+	mnb
chr2R	20539226	20539426	201	*	7.12599	6.54686	7.5381	-0.559292	0.0246582	0.215738	82.24	138.63	59.63	167.41	210.88	179.31	1	3	+	-	-	+	+	+	CG13427
chr3L	11819915	11820115	201	*	5.84303	5.19837	6.28701	-0.564168	0.0246731	0.215745	45.55	41.27	23.33	69.38	123.01	41.87	2	2	+	+	-	+	-	+	CG5946
chr4	1231742	1231942	201	*	5.57659	5.03883	5.96744	-0.55125	0.024703	0.215882	30.36	42.33	25.93	64.85	71.33	51.54	1	2	+	-	-	-	+	+	Dyrk3
chr3L	14992476	14992676	201	*	5.21413	4.6375	5.62498	-0.557439	0.0247825	0.216142	17.71	34.92	22.04	43.74	65.12	39.19	3	3	+	+	+	+	+	+	Zip71B
chr3R	7111377	7111577	201	*	6.30849	5.66162	6.75352	-0.563903	0.0247964	0.216142	41.75	86.77	23.33	92	116.81	114.89	1	1	+	-	-	-	+	-	Alh
chr2R	19141526	19141726	201	*	6.49581	5.85897	6.9361	-0.563555	0.0248161	0.216142	88.56	51.85	33.7	102.56	176.76	88.04	0	2	-	-	-	-	+	+	ena
chr3L	8628076	8628276	201	*	5.20585	4.53125	5.6637	-0.564224	0.024839	0.216142	27.83	28.57	12.96	46.75	80.63	24.69	1	1	-	+	-	-	-	+	Zasp66
chr4	670419	670619	201	*	5.56612	4.97779	5.98284	-0.558804	0.0248401	0.216142	18.98	44.45	31.11	60.33	82.7	46.71	1	2	+	-	-	-	+	+	CG11360
chr3L	9039177	9039377	201	*	5.80004	5.24393	6.20044	-0.556087	0.0248558	0.216142	55.67	35.98	22.04	66.36	78.56	75.7	3	3	+	+	+	+	+	+	Doc1
chr2L	9757952	9758152	201	*	5.29851	4.74344	5.69837	-0.553725	0.0248562	0.216142	31.63	25.4	23.33	58.82	60.99	35.97	1	2	+	-	-	+	-	+	zf30C
chr3R	20027911	20028111	201	*	5.23552	4.6354	5.65808	-0.559786	0.0248861	0.216142	32.89	22.22	19.44	55.8	66.16	29.53	1	3	+	-	-	+	+	+	CG4424
chr2R	10239152	10239352	201	*	5.92208	5.17819	6.41046	-0.5627	0.024887	0.216142	65.79	28.57	14.26	95.02	119.91	40.26	1	1	-	+	-	-	-	+	Hr3
chr3R	17149323	17149523	201	*	5.7211	5.13494	6.13674	-0.559365	0.0248876	0.216142	53.14	21.16	31.11	78.43	81.66	51	3	3	+	+	+	+	+	+	m-cup
chr2L	7027422	7027622	201	*	5.4103	4.77027	5.8521	-0.562693	0.0249145	0.216142	31.63	35.98	14.26	57.31	82.7	33.28	1	3	+	-	-	+	+	+	MME1
chr2L	12020891	12021091	201	*	4.90252	4.1929	5.37607	-0.563974	0.0249174	0.216142	29.1	17.99	7.78	43.74	60.99	19.86	3	3	+	+	+	+	+	+	Wdr81
chr4	1146473	1146673	201	*	5.30967	4.71814	5.72798	-0.558583	0.0249292	0.216142	30.36	31.75	16.85	52.79	71.33	34.89	3	3	+	+	+	+	+	+	Kif3C
chrX	10474584	10474784	201	*	5.0505	4.42782	5.48403	-0.560892	0.0249438	0.216142	16.45	33.86	14.26	45.25	57.89	31.14	1	3	-	+	-	+	+	+	CG2889
chrX	12395210	12395410	201	*	5.28966	5.75648	4.5952	0.563722	0.0249455	0.216142	48.08	92.07	22.04	16.59	39.28	16.64	3	3	+	+	+	+	+	+
chr2R	17056744	17056944	201	*	5.04914	4.43278	5.47962	-0.56063	0.0249754	0.216145	27.83	20.11	16.85	51.28	57.89	24.69	1	2	+	-	-	+	-	+	fat-spondin
chr2R	12633492	12633692	201	*	5.39019	4.76717	5.82389	-0.560886	0.0250041	0.216145	29.1	37.04	15.56	66.36	70.29	33.28	1	1	+	-	-	-	-	+	Iswi
chr2L	3000708	3000908	201	*	6.38505	5.73573	6.83122	-0.5632	0.0250282	0.216145	51.87	84.66	23.33	81.44	130.25	129.92	2	3	+	+	-	+	+	+	Ccdc85
chr3R	23126319	23126519	201	*	5.75216	5.21199	6.14426	-0.55205	0.0250421	0.216145	41.75	37.04	32.41	61.84	96.13	54.22	1	1	-	+	-	-	+	-	CG31365
chr3R	12382655	12382855	201	*	6.74334	6.06043	7.20497	-0.563478	0.0250694	0.216145	72.12	104.76	23.33	153.84	167.46	121.33	0	2	-	-	-	-	+	+	CG10035
chr3R	30425119	30425319	201	*	5.46423	4.8913	5.87321	-0.555721	0.0250698	0.216145	32.89	32.81	23.33	63.34	75.46	37.04	3	3	+	+	+	+	+	+	CG2217
chr3R	5264032	5264232	201	*	6.42826	5.71711	6.90249	-0.562989	0.0250747	0.216145	91.09	43.39	23.33	96.52	184	78.38	0	2	-	-	-	+	+	-	Tim17a2
chr2R	21102143	21102343	201	*	5.31144	4.60248	5.78469	-0.563163	0.0250769	0.216145	44.28	16.93	11.67	55.8	81.66	27.92	1	1	-	+	-	-	-	+	ktub
chr3L	18167176	18167376	201	*	5.957	5.37573	6.37019	-0.55759	0.0250814	0.216145	48.08	51.85	24.63	78.43	108.54	61.2	1	1	+	-	-	-	-	+
chr2L	16350894	16351094	201	*	5.47377	4.89151	5.88746	-0.557579	0.0250876	0.216145	36.69	38.1	14.26	55.8	71.33	50.46	2	2	+	-	+	+	+	-	chif
chr3L	9368840	9369040	201	*	6.29189	5.69481	6.71295	-0.559957	0.0251032	0.216157	73.38	56.09	25.93	84.46	126.11	104.15	1	2	+	-	-	+	+	-	Klp67A
chr2R	24402477	24402677	201	*	6.11905	5.53429	6.53398	-0.558613	0.0251305	0.216196	69.59	37.04	32.41	81.44	123.01	73.55	1	2	-	+	-	+	+	-	Rpn8
chrX	4678945	4679145	201	*	5.74838	5.04314	6.22	-0.56304	0.0251361	0.216196	36.69	51.85	10.37	57.31	113.71	52.61	1	3	-	+	-	+	+	+	fzr
chr3L	16612116	16612316	201	*	5.54872	4.99127	5.9498	-0.553724	0.0251897	0.216418	36.69	32.81	25.93	60.33	82.7	42.41	0	3	-	-	-	+	+	+	Prosbeta6
chr3L	2711642	2711842	201	*	5.19147	4.62993	5.59464	-0.554468	0.0251903	0.216418	30.36	17.99	25.93	54.29	56.85	33.82	0	3	-	-	-	+	+	+	Fife
chr3R	14649410	14649610	201	*	6.09712	5.43692	6.54835	-0.56254	0.0252511	0.216818	48.08	62.44	19.44	69.38	141.62	69.79	2	1	+	+	-	-	+	-	l(3)L1231
chr3R	21102073	21102273	201	*	5.88214	5.1043	6.38473	-0.558774	0.025299	0.217008	65.79	29.63	7.78	82.95	118.88	48.85	1	1	-	+	-	-	-	+	CG7044
chr2L	19795717	19795917	201	*	5.8256	5.2234	6.24919	-0.558821	0.0253088	0.217008	39.22	39.15	33.7	79.93	108.54	39.73	2	1	+	+	-	-	-	+	fs(2)ltoPP43
chrX	6700516	6700716	201	*	5.36204	4.75464	5.78817	-0.558997	0.025316	0.217008	34.16	33.86	12.96	55.8	71.33	38.65	3	3	+	+	+	+	+	+	CG14440
chr3L	7012871	7013071	201	*	4.88777	5.29188	4.32442	0.556197	0.0253392	0.217085	46.81	48.68	22.04	19.61	21.71	18.79	3	3	+	+	+	+	+	+	Mp
chr4	205910	206110	201	*	6.67178	6.01847	7.11982	-0.561848	0.0253778	0.217273	56.93	97.36	40.18	138.75	197.44	81.06	1	1	-	-	+	-	-	+	CG31998
chr3L	25848570	25848770	201	*	5.65986	5.07939	6.07264	-0.555756	0.0253896	0.217273	35.43	46.56	19.44	72.39	79.59	49.93	2	2	+	+	-	-	+	+	l(3)80Fg
chr3L	4363563	4363763	201	*	5.97526	5.38222	6.39431	-0.557758	0.0254213	0.217317	39.22	56.09	29.81	72.39	121.98	57.98	2	2	-	+	+	-	+	+	Cip4
chr3R	25038702	25038902	201	*	5.28936	4.72624	5.69335	-0.552601	0.0254377	0.217317	31.63	29.63	18.15	61.84	55.82	37.58	3	3	+	+	+	+	+	+	Ythdf
chr3L	166367	166567	201	*	5.16126	4.55294	5.58784	-0.558248	0.025456	0.217317	22.77	35.98	11.67	46.75	59.95	37.58	1	2	-	+	-	-	+	+	p130CAS
chr2L	15181317	15181517	201	*	5.01917	5.40265	4.49532	0.551053	0.0254635	0.217317	35.43	37.04	54.44	28.66	18.61	20.4	1	2	-	-	+	+	+	-	CG4168
chr3R	11431484	11431684	201	*	5.68819	5.1017	6.104	-0.556836	0.025466	0.217317	44.28	32.81	25.93	69.38	95.1	41.87	3	3	+	+	+	+	+	+	RpL24-like
chr3R	14511739	14511939	201	*	5.2487	4.68785	5.65153	-0.552692	0.0255163	0.217509	30.36	27.51	19.44	51.28	64.09	35.43	2	3	+	+	-	+	+	+	HtrA2
chrX	18668315	18668515	201	*	5.57555	4.83539	6.06234	-0.560626	0.025524	0.217509	25.3	48.68	11.67	61.84	107.5	31.14	1	3	-	+	-	+	+	+
chr2R	20836364	20836564	201	*	6.75208	5.97199	7.2556	-0.557514	0.0255314	0.217509	93.62	80.43	14.26	125.18	225.35	107.91	2	1	+	+	-	+	-	-	insc
chr3L	7225395	7225595	201	*	4.84521	5.24613	4.28807	0.552751	0.0255614	0.217643	44.28	30.69	38.89	22.62	13.44	22.55	1	1	+	-	-	+	-	-
chr3R	21621525	21621725	201	*	5.43013	4.89029	5.82206	-0.549434	0.0256545	0.218259	35.43	32.81	20.74	54.29	69.26	46.17	2	0	+	-	+	-	-	-	E2f1
chr3R	11780756	11780956	201	*	5.56259	5.028	5.95177	-0.548023	0.0256623	0.218259	36.69	39.15	22.04	64.85	68.22	52.61	1	2	+	-	-	+	-	+	l(3)neo38
chr3R	16763704	16763904	201	*	4.87128	4.31025	5.2742	-0.552269	0.0256917	0.218309	16.45	27.51	15.56	37.7	41.35	37.04	2	3	+	+	-	+	+	+	FBgn0020556
chrX	2125626	2125826	201	*	6.0876	5.31869	6.58651	-0.557926	0.0256969	0.218309	51.87	61.38	6.48	98.03	118.88	71.4	0	2	-	-	-	-	+	+	ph-d
chr2R	11399031	11399231	201	*	5.54159	4.97889	5.94537	-0.554125	0.0257568	0.218696	35.43	42.33	16.85	48.26	63.06	73.55	1	1	+	-	-	-	-	+	FBgn0050506
chr3L	11562847	11563047	201	*	5.10248	4.49997	5.5262	-0.557184	0.0258248	0.219081	36.69	16.93	14.26	52.79	52.72	32.75	0	2	-	-	-	-	+	+	CG7394
chr3L	19598992	19599192	201	*	5.1679	4.59107	5.57885	-0.553914	0.0258388	0.219081	27.83	32.81	11.67	48.26	52.72	42.41	2	1	+	+	-	-	+	-	ash1
chr3R	5670911	5671111	201	*	6.25738	5.63737	6.68962	-0.558589	0.0258452	0.219081	60.73	61.38	27.22	102.56	141.62	65.5	0	3	-	-	-	+	+	+	Xe7
chr3L	753799	753999	201	*	6.60269	5.99285	7.03001	-0.557914	0.0258942	0.219211	67.05	94.18	29.81	131.21	126.11	134.75	1	3	+	-	-	+	+	+	hng3
chr3L	16679539	16679739	201	*	5.2362	4.68355	5.6348	-0.551642	0.0258972	0.219211	35.43	22.22	19.44	45.25	64.09	39.73	1	1	-	+	-	-	-	+	Lasp
chr2R	17452171	17452371	201	*	4.90943	4.29455	5.3392	-0.557488	0.0259037	0.219211	18.98	24.34	15.56	34.69	60.99	25.77	0	2	-	-	-	+	+	-	mthl3
chr3R	4813218	4813418	201	*	5.24571	4.60811	5.68636	-0.558591	0.0259687	0.219632	31.63	28.57	12.96	57.31	69.26	27.92	1	1	-	+	-	-	+	-	Hus1-like
chr3R	7088977	7089177	201	*	6.63281	6.03243	7.05549	-0.557217	0.0259941	0.219632	103.75	55.03	37.59	114.62	155.06	129.38	3	3	+	+	+	+	+	+	Tailor
chr3L	20241442	20241642	201	*	6.00751	5.41358	6.42701	-0.555838	0.0259967	0.219632	46.81	60.32	20.74	85.97	101.3	70.86	1	1	+	-	-	-	+	-	Clc
chr3L	1940924	1941124	201	*	5.302	4.76474	5.69258	-0.547159	0.0260467	0.219933	30.36	31.75	19.44	52.79	59.95	42.41	2	3	+	+	-	+	+	+	CG5687
chr3L	544207	544407	201	*	6.73209	6.05971	7.18892	-0.559421	0.0261136	0.220265	120.19	42.33	37.59	132.72	192.27	112.74	1	3	+	-	-	+	+	+	Cypl
chr3R	9595514	9595714	201	*	5.40524	4.74549	5.85627	-0.55928	0.0261243	0.220265	15.18	49.74	15.56	36.2	65.12	72.47	1	2	-	+	-	-	+	+	CG8312
chr3R	4301657	4301857	201	*	5.42967	4.88356	5.82488	-0.548437	0.0261463	0.220265	32.89	34.92	20.74	57.31	69.26	43.48	1	3	-	+	-	+	+	+	cpx
chr2R	10821468	10821668	201	*	5.76399	5.12046	6.20745	-0.558674	0.0261522	0.220265	51.87	31.75	20.74	72.39	109.57	39.73	3	3	+	+	+	+	+	+	Lsm10
chr2L	10260074	10260274	201	*	6.83856	6.26388	7.24843	-0.554033	0.0261584	0.220265	106.28	81.48	42.78	135.74	168.49	151.93	1	1	+	-	-	-	-	+	Pten
chr3R	22733101	22733301	201	*	6.22891	5.62691	6.6524	-0.55601	0.0261797	0.220323	51.87	61.38	35	99.54	142.65	59.59	1	1	+	-	-	+	-	-	Takl2
chr3L	15517842	15518042	201	*	5.27422	4.69795	5.68489	-0.552755	0.0262177	0.220356	26.57	37.04	14.26	46.75	64.09	43.48	1	2	+	-	-	-	+	+	mex1
chr3R	28586331	28586531	201	*	6.5763	6.03904	6.96688	-0.548571	0.0262262	0.220356	45.55	80.43	71.29	102.56	138.52	134.21	3	3	+	+	+	+	+	+	fkh
chr3L	9019341	9019541	201	*	6.85073	6.18257	7.30563	-0.558737	0.02629	0.220356	117.66	73.02	27.22	165.9	179.86	128.84	2	3	+	+	-	+	+	+	Doc2
chr3L	11197503	11197703	201	*	6.56152	5.97193	6.97887	-0.554842	0.0263131	0.220356	80.97	64.55	42.78	113.11	177.8	87.51	2	3	+	+	-	+	+	+	GlcAT-P
chrX	15785492	15785692	201	*	5.59381	4.91129	6.05526	-0.55864	0.026316	0.220356	18.98	51.85	19.44	66.36	97.17	35.97	2	1	-	+	+	-	-	+	Paf-AHalpha
chr3R	14026244	14026444	201	*	5.58456	5.02158	5.98848	-0.550291	0.026327	0.220356	25.3	42.33	29.81	66.36	80.63	43.48	1	1	+	-	-	-	+	-	Cyp6d5
chr2R	21714736	21714936	201	*	6.06214	5.38409	6.52156	-0.558559	0.0263328	0.220356	67.05	46.56	11.67	72.39	103.37	99.85	2	3	+	+	-	+	+	+	HmgD
chr2L	6562216	6562416	201	*	6.14373	5.41104	6.62733	-0.55714	0.0263395	0.220356	72.12	41.27	14.26	93.51	148.85	54.22	1	1	+	-	-	-	-	+	CG9596
chr3L	10638036	10638236	201	*	5.26239	4.63209	5.69957	-0.556887	0.0263487	0.220356	29.1	34.92	10.37	52.79	68.22	34.89	2	0	+	-	+	-	-	-	E(z)
chr3R	25094723	25094923	201	*	5.41214	4.84672	5.8173	-0.551738	0.0263633	0.220356	43.02	26.46	16.85	55.8	67.19	46.17	2	3	+	+	-	+	+	+	fd96Cb
chr3R	6864004	6864204	201	*	7.55245	7.04913	7.92487	-0.540927	0.0263635	0.220356	107.54	164.03	125.74	232.26	244.99	251.78	2	3	+	+	-	+	+	+	ftz
chr3L	15025991	15026191	201	*	5.05613	4.4418	5.48564	-0.555415	0.02637	0.220356	25.3	24.34	15.56	49.77	59.95	24.69	1	1	+	-	-	-	-	+	Sytbeta
chr2L	15324528	15324728	201	*	5.53113	4.82555	6.0029	-0.558128	0.0263839	0.220356	46.81	20.11	18.15	84.46	82.7	25.23	2	3	+	+	-	+	+	+
chr2L	15319834	15320034	201	*	6.22928	5.61084	6.66077	-0.556336	0.0264111	0.220356	45.55	75.13	25.93	108.59	123.01	71.94	2	3	+	+	-	+	+	+	nht
chr4	42917	43117	201	*	5.15827	4.63925	5.53917	-0.543944	0.0264282	0.220356	29.1	27.51	18.15	45.25	47.55	46.71	1	3	+	-	-	+	+	+	PlexB
chr2R	16210399	16210599	201	*	5.30515	4.5806	5.78522	-0.557473	0.0264324	0.220356	40.49	22.22	9.07	66.36	75.46	23.62	2	2	+	+	-	-	+	+	mrj
chr2L	13378465	13378665	201	*	5.68114	4.98727	6.1477	-0.558019	0.0264392	0.220356	58.2	20.11	16.85	76.92	98.2	37.58	0	2	-	-	-	+	+	-	beta'COP
chr3L	2197323	2197523	201	*	6.80523	6.21659	7.2221	-0.554322	0.0264768	0.220356	41.75	110.06	71.29	125.18	164.36	158.37	1	1	-	+	-	-	+	-	CG8960
chr3R	7144603	7144803	201	*	5.74579	5.113	6.18416	-0.556983	0.0264868	0.220356	54.4	33.86	15.56	79.93	90.97	47.24	1	3	-	+	-	+	+	+	CG14610
chr3R	6818903	6819103	201	*	5.67167	5.10897	6.07545	-0.551459	0.0265	0.220356	46.81	35.98	20.74	52.79	89.93	59.59	1	2	+	-	-	-	+	+	FBgn0026162
chr3L	21433045	21433245	201	*	5.36736	4.73981	5.80322	-0.556053	0.0265015	0.220356	29.1	38.1	12.96	61.84	71.33	34.36	1	1	+	-	-	-	+	-	Aef1
chr2L	5278953	5279153	201	*	5.63962	5.05107	6.05644	-0.55296	0.0265224	0.220356	39.22	43.39	16.85	76.92	74.43	48.32	1	1	-	+	-	-	-	+	Bsg25D
chrX	3744573	3744773	201	*	5.99451	5.26187	6.47808	-0.556504	0.0265228	0.220356	64.52	40.21	10.37	96.52	119.91	51	1	3	-	+	-	+	+	+	Tlk
chr2L	22705264	22705464	201	*	5.13238	4.59556	5.52273	-0.544996	0.0265693	0.220356	24.04	26.46	22.04	49.77	52.72	35.43	1	3	-	+	-	+	+	+	CG40006
chr3R	21365179	21365379	201	*	5.0209	4.35914	5.47285	-0.557606	0.0265771	0.220356	34.16	22.22	5.19	36.2	58.92	38.12	3	3	+	+	+	+	+	+	mod(mdg4)
chr3R	14655055	14655255	201	*	5.80934	5.22216	6.22549	-0.554102	0.026578	0.220356	58.2	31.75	22.04	60.33	100.27	63.88	3	3	+	+	+	+	+	+	CG3505
chr2R	11630083	11630283	201	*	4.8254	4.25899	5.23108	-0.552188	0.0266073	0.220356	20.24	19.05	18.15	25.64	53.75	33.28	1	3	-	+	-	+	+	+	CG9005
chr2R	24057665	24057865	201	*	6.62561	6.0192	7.05125	-0.555164	0.0266107	0.220356	94.89	58.2	41.48	153.84	158.16	85.9	1	1	+	-	-	-	+	-	ppk29
chr2L	1068044	1068244	201	*	6.09829	5.42793	6.5542	-0.55749	0.0266225	0.220356	73.38	40.21	15.56	99.54	114.74	67.64	1	2	+	-	-	-	+	+	S
chr3R	7977643	7977843	201	*	6.2027	5.65783	6.59726	-0.547844	0.0266258	0.220356	41.75	53.97	55.74	92	129.21	69.25	0	2	-	-	-	+	+	-	Os-C
chr2R	23882313	23882513	201	*	5.36107	4.75602	5.78604	-0.554733	0.0266319	0.220356	41.75	21.16	18.15	58.82	72.36	34.36	3	3	+	+	+	+	+	+	CG4882
chr2R	20327414	20327614	201	*	5.93321	5.34981	6.34746	-0.552849	0.0266786	0.220623	46.81	56.09	19.44	70.88	97.17	76.23	1	2	-	+	-	-	+	+	MED8
chr3R	10852409	10852609	201	*	5.36195	4.82705	5.75129	-0.543994	0.0267243	0.220881	22.77	33.86	28.52	61.84	57.89	41.87	2	2	-	+	+	-	+	+	CG4565
chrX	15909179	15909379	201	*	4.90192	4.26224	5.34356	-0.555576	0.0267493	0.220968	13.92	30.69	12.96	40.72	54.79	26.31	1	1	-	+	-	-	+	-	CycD
chr3R	5114141	5114341	201	*	6.20699	5.48485	6.68601	-0.555808	0.0267699	0.221018	77.18	45.5	11.67	92	138.52	78.38	2	3	+	+	-	+	+	+
chr3R	24866867	24867067	201	*	5.94914	5.24973	6.41817	-0.55637	0.0268278	0.221274	60.73	39.15	14.26	64.85	137.48	54.22	2	3	+	+	-	+	+	+	Elal
chrX	15887282	15887482	201	*	5.87032	5.28207	6.287	-0.552137	0.0268347	0.221274	40.49	52.91	23.33	82.95	99.24	52.07	1	1	-	+	-	-	-	+	tay
chr3R	10330920	10331120	201	*	5.47385	4.91628	5.87499	-0.550045	0.0268444	0.221274	41.75	30.69	18.15	43.74	76.49	55.83	1	3	-	+	-	+	+	+	CG12818
chr3L	14177062	14177262	201	*	6.19772	5.6561	6.59058	-0.547776	0.0268661	0.221312	69.59	40.21	41.48	76.92	120.94	91.26	1	1	+	-	-	-	-	+	D
chr2L	10362895	10363095	201	*	5.53929	4.96235	5.9503	-0.551281	0.0268808	0.221312	26.57	42.33	24.63	46.75	90.97	47.78	1	2	+	-	-	+	-	+	pim
chr3L	15199547	15199747	201	*	5.46578	4.91801	5.86186	-0.546431	0.0268983	0.221312	26.57	43.39	20.74	57.31	66.16	51	1	1	-	+	-	-	+	-
chr2R	11191581	11191781	201	*	6.73833	6.13188	7.16398	-0.554315	0.0269071	0.221312	55.67	113.23	41.48	120.66	143.68	165.89	2	3	+	+	-	+	+	+	shn
chr3R	16656226	16656426	201	*	6.22527	5.67515	6.62256	-0.546993	0.0269757	0.221757	48.08	62.44	42.78	108.59	119.91	67.11	0	2	-	-	-	+	+	-	modSP
chr2R	21523843	21524043	201	*	6.72128	6.17186	7.11821	-0.547628	0.0270388	0.222012	80.97	89.95	45.37	126.69	161.26	128.84	1	3	+	-	-	+	+	+	Egfr
chrX	8141786	8141986	201	*	5.6861	5.04336	6.12918	-0.555326	0.0270489	0.222012	46.81	39.15	12.96	72.39	93.03	44.56	1	1	+	-	-	-	+	-	Smox
chr3R	7124112	7124312	201	*	5.30219	4.73374	5.7089	-0.549054	0.0270505	0.222012	34.16	27.51	18.15	54.29	67.19	35.43	3	3	+	+	+	+	+	+	CG10098
chr2R	6603185	6603385	201	*	5.60274	4.97371	6.03932	-0.554905	0.0270807	0.22214	55.67	24.34	14.26	70.88	76.49	49.93	1	1	+	-	-	-	+	-	CG15233
chr3R	4232269	4232469	201	*	6.57008	5.99931	6.97796	-0.550093	0.027135	0.22241	56.93	85.72	49.26	102.56	174.7	100.93	1	1	-	+	-	-	+	-	Gel
chr3R	4638593	4638793	201	*	5.79949	5.21515	6.21421	-0.552524	0.0271469	0.22241	40.49	47.62	23.33	40.72	82.7	99.32	2	1	+	-	+	-	-	+	CG9775
chr3R	12010701	12010901	201	*	5.36879	4.75491	5.79807	-0.553872	0.0271573	0.22241	44.28	21.16	15.56	51.28	77.53	38.12	1	1	-	+	-	-	+	-	KLHL18
chr3R	9037987	9038187	201	*	5.4597	4.84849	5.88768	-0.553398	0.0272253	0.222847	43.02	31.75	11.67	51.28	78.56	47.78	3	3	+	+	+	+	+	+	neur
chr3R	28819477	28819677	201	*	5.24068	4.64622	5.66044	-0.550618	0.0272635	0.22295	24.04	26.46	24.63	61.84	63.06	26.84	3	3	+	+	+	+	+	+	CG1523
chr3L	14029047	14029247	201	*	6.17555	5.6354	6.56764	-0.545131	0.0272753	0.22295	65.79	44.45	38.89	102.56	110.61	71.4	1	1	-	+	-	-	-	+	CG6650
chr3R	5090114	5090314	201	*	5.52178	4.879	5.96488	-0.554893	0.0272818	0.22295	44.28	34.92	9.07	42.23	64.09	81.06	0	2	-	-	-	-	+	+
chr2R	8113763	8113963	201	*	4.8965	4.36375	5.28471	-0.545353	0.0273048	0.223019	16.45	23.28	22.04	30.16	46.52	40.26	2	2	-	+	+	-	+	+	udd
chr2R	12259257	12259457	201	*	5.56896	5.00315	5.97433	-0.547469	0.0273641	0.223306	37.96	34.92	23.33	72.39	76.49	39.73	1	1	+	-	-	-	-	+	Cam
chr2R	10048581	10048781	201	*	6.68583	6.11223	7.09515	-0.549735	0.0273694	0.223306	88.56	76.19	42.78	128.2	176.76	105.22	1	2	-	+	-	+	+	-	oys
chr3R	4387063	4387263	201	*	5.92817	5.31545	6.35689	-0.552824	0.0273924	0.223328	24.04	65.61	29.81	63.34	110.61	71.94	3	2	+	+	+	+	-	+	tub
chr3R	20574127	20574327	201	*	6.53389	5.92767	6.95944	-0.552527	0.0274014	0.223328	45.55	99.47	37.59	102.56	146.79	124.01	1	3	-	+	-	+	+	+	CG5412
chr2L	7219343	7219543	201	*	6.2984	5.61457	6.76044	-0.554333	0.027457	0.223625	64.52	65.61	16.85	105.57	149.89	69.79	2	3	+	+	-	+	+	+	CG13784
chr3L	2631392	2631592	201	*	5.30276	4.73281	5.71023	-0.547197	0.0274671	0.223625	26.57	28.57	24.63	61.84	64.09	31.14	1	2	-	+	-	-	+	+	Pxn
chrX	20663630	20663830	201	*	4.99862	4.33476	5.45155	-0.554061	0.0274912	0.223629	12.65	34.92	12.96	37.7	65.12	28.45	2	3	+	+	-	+	+	+	CG1835
chr3R	24046614	24046814	201	*	6.39522	5.84315	6.79352	-0.546832	0.0274969	0.223629	79.71	49.74	42.78	102.56	140.58	89.65	1	1	-	+	-	-	+	-	Rox8
chr2L	10231592	10231792	201	*	5.7357	5.1761	6.13788	-0.5469	0.027518	0.223643	36.69	49.74	22.04	63.34	89.93	57.98	2	3	+	+	-	+	+	+	ova
chr3R	29039046	29039246	201	*	6.52671	5.9764	6.9241	-0.546321	0.0275458	0.223643	87.3	49.74	51.85	126.69	143.68	93.95	3	3	+	+	+	+	+	+	Pkc98E
chr4	1027764	1027964	201	*	5.34089	4.81644	5.7247	-0.541976	0.0275518	0.223643	34.16	29.63	20.74	45.25	66.16	47.24	2	0	+	+	-	-	-	-	PlexA
chr3L	21176419	21176619	201	*	5.69268	5.09018	6.11641	-0.550723	0.0276095	0.223643	22.77	56.09	23.33	73.9	82.7	51.54	1	1	+	-	-	-	-	+	chb
chr2R	4827322	4827522	201	*	5.21563	4.58786	5.6516	-0.552552	0.027612	0.223643	35.43	21.16	15.56	57.31	67.19	26.31	1	1	-	-	+	-	-	+	CG14464
chr3R	10614369	10614569	201	*	7.72806	6.99049	8.21375	-0.551566	0.0276251	0.223643	217.61	130.16	33.7	266.95	363.86	259.83	1	3	+	-	-	+	+	+	hth
chr3R	5862054	5862254	201	*	4.85586	5.23705	4.3363	0.541796	0.0276373	0.223643	44.28	33.86	35	19.61	22.74	18.25	1	2	+	-	-	-	+	+	CG2017
chr2R	17590818	17591018	201	*	5.26703	4.74701	5.64847	-0.53906	0.0276462	0.223643	27.83	30.69	22.04	52.79	55.82	41.87	1	3	-	+	-	+	+	+	Smurf
chr2R	16185972	16186172	201	*	5.54876	4.95049	5.9704	-0.550371	0.0276539	0.223643	18.98	46.56	27.22	58.82	85.8	43.48	2	2	-	+	+	+	+	-	CG8441
chr2L	7245396	7245596	201	*	6.13166	5.4675	6.58472	-0.553661	0.0276593	0.223643	60.73	48.68	23.33	72.39	159.19	56.37	1	3	+	-	-	+	+	+	Ndae1
chr3L	8832576	8832776	201	*	5.22981	4.65306	5.64072	-0.548223	0.0276601	0.223643	27.83	35.98	11.67	48.26	56.85	44.56	1	2	+	-	-	+	+	-	dally
chr3R	14027316	14027516	201	*	5.39663	4.79692	5.81898	-0.550495	0.0277251	0.224019	26.57	41.27	15.56	45.25	80.63	43.48	2	3	+	+	-	+	+	+	Cyp6d5
chr3R	19463347	19463547	201	*	6.4488	5.77591	6.90587	-0.553343	0.0277425	0.224019	97.42	42.33	24.63	126.69	150.92	82.14	1	1	+	-	-	-	+	-	Scsalpha2
chrX	10474019	10474219	201	*	5.04518	4.38004	5.49869	-0.553204	0.0277506	0.224019	20.24	37.04	5.19	46.75	47.55	41.34	1	2	-	+	-	+	+	-	CG2889
chr2L	6960236	6960436	201	*	5.17195	4.57816	5.59138	-0.549377	0.0277972	0.224143	30.36	29.63	11.67	48.26	62.02	34.36	1	1	+	-	-	-	-	+	Atac1
chrX	356390	356590	201	*	5.48345	5.92892	4.83563	0.553035	0.027804	0.224143	24.04	106.88	51.85	24.13	33.08	28.45	2	0	+	+	-	-	-	-	y
chr3R	6809888	6810088	201	*	5.29367	4.70912	5.7085	-0.549698	0.0278102	0.224143	41.75	21.16	15.56	45.25	70.29	41.34	3	3	+	+	+	+	+	+	FBgn0261503
chr3L	22878683	22878883	201	*	5.7064	5.06819	6.14734	-0.552366	0.0278572	0.224404	54.4	30.69	15.56	85.97	83.73	42.95	2	3	+	+	-	+	+	+	Ssl1
chr3R	13780850	13781050	201	*	5.02602	4.38873	5.46653	-0.552073	0.0278985	0.224618	25.3	23.28	14.26	37.7	71.33	23.62	1	3	-	-	+	+	+	+	Dip-B
chr3L	16131507	16131707	201	*	5.67579	5.14845	6.06113	-0.541163	0.0279308	0.224759	35.43	35.98	35	57.31	92	51	3	3	+	+	+	+	+	+	Pgm1
chrX	487567	487767	201	*	5.81712	5.14297	6.27477	-0.552565	0.0279642	0.224827	30.36	61.38	14.26	76.92	105.44	49.93	3	3	+	+	+	+	+	+	CG3156
chr3R	29215085	29215285	201	*	6.90148	6.19928	7.37174	-0.55188	0.0279812	0.224827	125.25	66.67	28.52	167.41	226.38	103.07	2	3	+	+	-	+	+	+	FBgn0051044
chr2L	1170050	1170250	201	*	5.14074	4.59843	5.53397	-0.542342	0.0279836	0.224827	27.83	25.4	19.44	46.75	57.89	34.36	2	3	+	+	-	+	+	+	Plap
chr4	315818	316018	201	*	4.81469	4.19413	5.24721	-0.550406	0.0280257	0.224915	16.45	30.69	7.78	40.72	36.18	37.04	2	3	+	+	-	+	+	+	Zip102B
chr3L	5366354	5366554	201	*	5.37469	4.82089	5.77389	-0.543547	0.0280262	0.224915	27.83	34.92	22.04	57.31	69.26	37.58	2	3	+	+	-	+	+	+	Uev1A
chr3L	17416429	17416629	201	*	6.82665	6.19154	7.26612	-0.551866	0.0280387	0.224915	93.62	98.42	27.22	146.29	157.12	158.37	2	1	+	+	-	-	+	-	blot
chr2R	10522442	10522642	201	*	5.29532	4.65113	5.73909	-0.551967	0.0280778	0.22497	48.08	16.93	10.37	55.8	62.02	42.41	1	2	-	+	-	+	+	-	lola
chr3R	5612730	5612930	201	*	5.6191	5.08593	6.00753	-0.542588	0.028085	0.22497	46.81	31.75	23.33	52.79	80.63	59.59	1	2	-	+	-	-	+	+	Rga
chr2R	24037836	24038036	201	*	5.77199	5.18779	6.18665	-0.548934	0.0280899	0.22497	55.67	26.46	27.22	58.82	104.4	55.3	2	3	+	+	-	+	+	+	Not11
chr2R	21545469	21545669	201	*	7.24719	6.62219	7.68183	-0.551228	0.0281287	0.225163	144.23	111.11	40.18	199.08	227.41	189.51	1	2	-	+	-	+	+	-	Egfr
chr3L	5563622	5563822	201	*	5.75206	5.1568	6.17222	-0.549049	0.0281495	0.225211	54.4	25.4	27.22	84.46	87.86	44.02	2	3	+	+	-	+	+	+	sinu
chr2L	10728864	10729064	201	*	5.48214	4.83888	5.92547	-0.551257	0.0281683	0.225243	26.57	47.62	11.67	60.33	79.59	42.41	2	3	+	+	-	+	+	+	CG6443
chr3L	15832320	15832520	201	*	5.67572	5.12938	6.07105	-0.542057	0.0282222	0.225555	34.16	42.33	28.52	73.9	82.7	45.1	2	3	-	+	+	+	+	+	CG12713
chr2R	7440605	7440805	201	*	5.5898	5.05688	5.9781	-0.540344	0.0282445	0.225615	37.96	35.98	25.93	63.34	79.59	46.17	3	3	+	+	+	+	+	+	CG11123
chr4	958353	958553	201	*	6.25554	5.73669	6.63634	-0.53804	0.0282676	0.225615	44.28	67.73	47.96	102.56	112.67	83.21	1	1	-	+	-	-	-	+	4E-T
chr2L	6647017	6647217	201	*	4.96243	4.38873	5.3718	-0.544744	0.0282842	0.225615	25.3	23.28	14.26	51.28	43.42	29.53	2	3	+	+	-	+	+	+	CG31635
chr3L	17513820	17514020	201	*	5.04891	4.35575	5.51516	-0.55123	0.0282888	0.225615	30.36	23.28	7.78	40.72	73.39	23.08	1	1	+	-	-	-	+	-	U4-U6-60K
chr4	105830	106030	201	*	4.8154	4.25202	5.21953	-0.5437	0.0283655	0.225888	16.45	26.46	14.26	39.21	39.28	33.28	1	1	+	-	-	-	-	+	pan
chr2R	7962355	7962555	201	*	5.9783	5.41687	6.38143	-0.545375	0.0283705	0.225888	60.73	40.21	27.22	72.39	110.61	67.11	2	3	+	+	-	+	+	+	2021-09-05
chr2L	2364310	2364510	201	*	5.50441	4.93787	5.91014	-0.545128	0.028371	0.225888	44.28	24.34	23.33	70.88	69.26	40.26	0	2	-	-	-	-	+	+	Rab5
chr2R	4833239	4833439	201	*	4.9822	4.42938	5.3809	-0.541717	0.0284055	0.225888	18.98	27.51	18.15	45.25	47.55	32.21	0	3	-	-	-	+	+	+
chr3R	22639532	22639732	201	*	5.33292	4.79482	5.72395	-0.541093	0.0284087	0.225888	37.96	23.28	22.04	57.31	60.99	40.26	3	3	+	+	+	+	+	+	loco
chr3R	21878605	21878805	201	*	5.12157	4.55754	5.52602	-0.543234	0.0284243	0.225888	18.98	29.63	22.04	51.28	55.82	31.14	1	1	-	+	-	-	+	-	CG31465
chr3L	16851914	16852114	201	*	5.23211	4.71506	5.61196	-0.538212	0.0284346	0.225888	32.89	26.46	19.44	43.74	57.89	45.1	1	1	+	-	-	+	-	-	sina
chr3R	31193240	31193440	201	*	7.41469	6.86594	7.81128	-0.543478	0.0284485	0.225888	78.44	170.37	101.11	206.62	218.11	249.1	2	3	+	+	-	+	+	+	bnk
chr3L	347342	347542	201	*	5.97117	5.33444	6.41141	-0.550162	0.0284565	0.225888	46.81	56.09	18.15	102.56	102.34	50.46	3	3	+	+	+	+	+	+	mth
chr2R	17015863	17016063	201	*	5.9061	5.32767	6.31785	-0.546583	0.0284889	0.225922	56.93	40.21	23.33	75.41	106.47	57.44	2	3	+	+	-	+	+	+	Ehbp1
chr2R	16207569	16207769	201	*	7.18174	6.54978	7.61972	-0.550148	0.0284904	0.225922	99.95	111.11	70	218.69	281.17	90.19	3	3	+	+	+	+	+	+	mrj
chr3L	20526098	20526298	201	*	5.93192	5.33718	6.35182	-0.548015	0.0285393	0.226192	63.26	35.98	22.04	78.43	106.47	60.13	1	1	+	-	-	-	-	+	l(3)77CDf
chr3R	25884003	25884203	201	*	6.19124	5.5666	6.62571	-0.54946	0.0286195	0.226397	69.59	51.85	20.74	92	132.31	71.94	1	2	+	-	-	+	-	+	Tsp96F
chr3L	1569951	1570151	201	*	5.64879	5.11423	6.03795	-0.5402	0.0286291	0.226397	30.36	47.62	25.93	54.29	82.7	60.13	2	3	+	+	-	+	+	+	CG7879
chr3R	16570458	16570658	201	*	5.89863	5.27321	6.33347	-0.549295	0.0286422	0.226397	61.99	30.69	23.33	96.52	99.24	46.17	3	3	+	+	+	+	+	+	CG14891
chr3R	13032360	13032560	201	*	6.0787	5.50006	6.49057	-0.545955	0.0286544	0.226397	56.93	52.91	25.93	85.97	119.91	63.88	1	1	+	-	-	-	-	+	ry
chr3R	5571507	5571707	201	*	5.58326	5.0172	5.98875	-0.544403	0.0286554	0.226397	48.08	29.63	19.44	69.38	74.43	46.71	2	0	+	+	-	-	-	-	CRMP
chr3L	15835304	15835504	201	*	5.42358	4.85659	5.82955	-0.544534	0.0286674	0.226397	32.89	30.69	23.33	48.26	84.76	37.58	1	1	-	+	-	-	+	-	CG18081
chr3L	14150196	14150396	201	*	6.74378	6.10991	7.18267	-0.549639	0.0286722	0.226397	86.03	95.24	25.93	138.75	161.26	135.82	1	3	+	-	-	+	+	+
chrX	18893521	18893721	201	*	6.3699	5.71814	6.81722	-0.549856	0.0286869	0.226397	39.22	88.89	29.81	120.66	146.79	70.86	0	2	-	-	-	+	+	-	Flacc
chr3R	25127269	25127469	201	*	6.03518	5.47787	6.43619	-0.543431	0.0286988	0.226397	51.87	33.86	47.96	96.52	109.57	53.68	2	1	+	+	-	-	-	+	Mocs2B
chr2R	11982241	11982441	201	*	6.40765	5.77861	6.84423	-0.549187	0.0287284	0.226513	56.93	85.72	22.04	116.13	128.18	100.39	0	2	-	-	-	+	+	-	CG30037
chr3R	23257967	23258167	201	*	6.65139	6.01418	7.09186	-0.549395	0.0287653	0.226594	77.18	80.43	36.3	114.62	210.88	83.75	1	1	+	-	-	-	+	-	wda
chr2L	4080698	4080898	201	*	4.94695	4.35075	5.36758	-0.547278	0.0287684	0.226594	30.36	12.7	18.15	42.23	54.79	26.84	2	3	+	+	-	+	+	+	ed
chr3L	17446020	17446220	201	*	4.99805	4.40203	5.41859	-0.545552	0.0288192	0.22686	25.3	26.46	11.67	51.28	48.58	28.45	2	1	-	+	+	-	+	-	CG18265
chr3L	788864	789064	201	*	5.36654	4.77923	5.78274	-0.546799	0.0288359	0.22686	15.18	41.27	25.93	52.79	37.21	75.16	2	3	+	+	-	+	+	+
chrX	17301892	17302092	201	*	5.29611	4.58678	5.76953	-0.548869	0.0288468	0.22686	21.51	40.21	10.37	43.74	92	27.92	2	3	+	+	-	+	+	+	Fim
chr3R	6399568	6399768	201	*	5.05039	4.50618	5.44462	-0.541776	0.0288628	0.226869	29.1	22.22	16.85	34.69	58.92	37.04	2	3	+	+	-	+	+	+	Dmtn
chr3L	1639635	1639835	201	*	5.25565	4.70097	5.6553	-0.540932	0.0289409	0.227365	25.3	30.69	22.04	52.79	65.12	33.28	1	3	+	-	-	+	+	+	nSyb
chr3R	24038117	24038317	201	*	5.19429	4.5327	5.64616	-0.548977	0.0289646	0.227434	30.36	22.22	16.85	51.28	78.56	20.4	1	1	-	+	-	-	-	+	Miro
chr3R	10853236	10853436	201	*	5.55588	5.0199	5.94578	-0.54059	0.0290451	0.227745	20.24	43.39	33.7	52.79	53.75	78.38	1	3	+	-	-	+	+	+	CG4565
chr3R	16826249	16826449	201	*	6.74393	6.20655	7.13458	-0.539918	0.0290526	0.227745	67.05	102.65	51.85	125.18	151.95	144.41	1	3	+	-	-	+	+	+	abd-A
chr2L	13222457	13222657	201	*	5.67502	5.08897	6.0906	-0.544765	0.0290553	0.227745	31.63	49.74	20.74	69.38	88.9	46.17	1	2	+	-	-	-	+	+	CG9426
chr2L	21683251	21683451	201	*	5.54887	4.8858	6.00143	-0.54865	0.029064	0.227745	31.63	40.21	16.85	60.33	102.34	29.53	1	2	+	-	-	+	-	+	eEF2
chr3R	21494019	21494219	201	*	5.82695	5.25931	6.23324	-0.543232	0.0291393	0.228218	48.08	48.68	18.15	73.9	86.83	64.96	2	1	+	+	-	-	-	+
chr2R	12451300	12451500	201	*	5.75349	5.239	6.13196	-0.534594	0.0291646	0.228274	31.63	51.85	29.81	70.88	71.33	68.18	3	3	+	+	+	+	+	+	Lac
chr3R	19094867	19095067	201	*	5.85086	5.29426	6.2515	-0.54195	0.0291765	0.228274	44.28	42.33	31.11	64.85	111.64	52.07	1	3	+	-	-	+	+	+	cdi
chr2L	3048595	3048795	201	*	6.15461	5.64018	6.53305	-0.534543	0.0292543	0.228766	39.22	62.44	47.96	93.51	106.47	77.84	1	1	+	-	-	-	+	-	FBgn0003934
chr3R	25646784	25646984	201	*	5.81932	5.28718	6.20721	-0.53837	0.0292699	0.22877	43.02	50.79	23.33	63.34	84.76	73.55	1	3	-	-	+	+	+	+	jigr1
chr2L	11794622	11794822	201	*	4.99724	4.44317	5.39658	-0.539211	0.0293217	0.228986	22.77	24.34	18.15	48.26	48.58	29.53	2	3	+	+	-	+	+	+	crol
chr2L	20783173	20783373	201	*	5.79048	5.21591	6.20029	-0.543736	0.0293275	0.228986	53.14	40.21	18.15	66.36	93.03	61.2	1	1	+	-	-	-	-	+
chr3R	26882792	26882992	201	*	5.8045	5.25404	6.20198	-0.540983	0.0294226	0.229462	46.81	39.15	28.52	54.29	107.5	59.05	2	0	-	+	+	-	-	-	ro
chr3L	15711429	15711629	201	*	5.62706	4.98798	6.06841	-0.547165	0.0294235	0.229462	24.04	58.2	12.96	61.84	57.89	81.6	3	3	+	+	+	+	+	+
chr3L	16776037	16776237	201	*	6.11939	5.56171	6.52059	-0.541468	0.0294372	0.229462	70.85	42.33	28.52	107.08	88.9	79.45	1	2	+	-	-	-	+	+	Nrt
chr3L	15516566	15516766	201	*	5.14938	4.61508	5.5384	-0.537117	0.0294682	0.229462	21.51	33.86	18.15	42.23	54.79	42.41	1	2	+	-	-	-	+	+	CG13454
chr2R	10078164	10078364	201	*	6.80251	6.22605	7.21328	-0.543824	0.0294754	0.229462	110.07	73.02	41.48	126.69	176.76	141.73	3	3	+	+	+	+	+	+	CG1371
chr3R	10109873	10110073	201	*	5.44952	4.91054	5.841	-0.536877	0.0295005	0.229462	31.63	39.15	19.44	67.87	56.85	47.24	3	3	+	+	+	+	+	+	Fmr1
chr3R	4962748	4962948	201	*	5.52418	4.97423	5.9214	-0.539681	0.0295084	0.229462	39.22	31.75	23.33	58.82	81.66	41.34	0	2	-	-	-	-	+	+	CG1124
chr4	1087657	1087857	201	*	4.82887	4.30768	5.21093	-0.536644	0.0295089	0.229462	16.45	22.22	20.74	33.18	39.28	38.65	2	3	+	+	-	+	+	+	sv
chr3L	20309869	20310069	201	*	6.75129	6.13686	7.18084	-0.545859	0.0295481	0.229616	80.97	89.95	40.18	164.39	186.07	84.82	0	3	-	-	-	+	+	+	polo
chrX	4554809	4555009	201	*	4.89448	4.23619	5.34483	-0.546924	0.0295589	0.229616	27.83	22.22	6.48	36.2	59.95	25.77	0	3	-	-	-	+	+	+	CG11436
chr2R	5663797	5663997	201	*	5.76079	5.14806	6.18951	-0.545766	0.0295797	0.229661	50.61	40.21	15.56	60.33	104.4	54.22	2	2	+	-	+	+	-	+	Not3
chr3R	11639776	11639976	201	*	5.54081	5.02735	5.91872	-0.533147	0.0296362	0.229962	34.16	33.86	29.81	58.82	76.49	46.17	3	3	+	+	+	+	+	+	Csk
chr3L	3223239	3223439	201	*	5.43745	4.91583	5.81974	-0.536089	0.0296593	0.229962	27.83	38.1	24.63	40.72	72.36	56.37	1	3	-	+	-	+	+	+	RpL28
chr2L	19542791	19542991	201	*	5.26618	5.6656	4.71197	0.542271	0.0296637	0.229962	35.43	74.08	42.78	22.62	37.21	18.79	1	1	+	-	-	-	+	-	ref(2)P
chr3L	2444558	2444758	201	*	4.88941	4.33875	5.28699	-0.540734	0.0297061	0.230173	31.63	14.82	14.26	37.7	42.38	37.04	0	2	-	-	-	+	+	-	Svil
chr3R	24259447	24259647	201	*	6.6152	5.97325	7.0579	-0.54626	0.0297314	0.230175	98.68	56.09	33.7	135.74	184	79.99	1	1	-	+	-	-	-	+	jar
chr2R	4610300	4610500	201	*	5.66842	5.10868	6.07067	-0.540028	0.0297443	0.230175	37.96	37.04	28.52	69.38	92	40.26	2	3	+	+	-	+	+	+
chr3R	8659480	8659680	201	*	6.27164	5.67307	6.69343	-0.544481	0.0297516	0.230175	72.12	55.03	25.93	90.49	141.62	78.38	2	2	+	+	-	+	-	+	bel
chrX	17232628	17232828	201	*	4.8222	4.02369	5.33322	-0.540651	0.0297697	0.230198	11.39	29.63	7.78	36.2	71.33	13.42	2	3	+	+	-	+	+	+	CG10597
chr3L	14995414	14995614	201	*	5.33757	4.82494	5.71503	-0.534554	0.0298018	0.230205	27.83	33.86	23.33	37.7	65.12	54.76	0	2	-	-	-	-	+	+	Zip71B
chr3L	174056	174256	201	*	4.93715	4.35927	5.34864	-0.542409	0.0298375	0.230205	25.3	11.64	24.63	45.25	49.62	27.38	1	3	+	-	-	+	+	+	p130CAS
chr2L	21795356	21795556	201	*	5.53041	4.89012	5.97233	-0.545757	0.0298427	0.230205	45.55	31.75	11.67	61.84	87.86	38.65	0	2	-	-	-	-	+	+	CG31612
chr2R	19292847	19293047	201	*	5.42648	4.8628	5.83075	-0.540589	0.0298436	0.230205	31.63	34.92	20.74	46.75	83.73	40.26	2	3	+	+	-	+	+	+	mip40
chr3L	298647	298847	201	*	5.73142	5.06393	6.18601	-0.545986	0.0298462	0.230205	20.24	64.55	15.56	79.93	83.73	54.76	3	3	+	+	+	+	+	+	RhoGEF3
chr3R	6368091	6368291	201	*	5.92015	5.29499	6.35488	-0.54544	0.029865	0.230234	56.93	34.92	25.93	63.34	133.35	48.85	2	3	+	+	-	+	+	+	CG10286
chr2L	821342	821542	201	*	5.54633	4.92137	5.98096	-0.545023	0.0298963	0.230359	48.08	28.57	14.26	75.41	76.49	37.58	1	2	+	-	-	+	+	-	PGAP2
chr2L	8126840	8127040	201	*	6.37445	5.80849	6.77989	-0.540741	0.029952	0.230519	61.99	69.84	36.3	105.57	146.79	77.31	0	2	-	-	-	+	+	-	mon2
chr3R	22211608	22211808	201	*	5.05446	4.43468	5.4866	-0.544242	0.029957	0.230519	18.98	26.46	19.44	43.74	68.22	22.55	1	3	-	+	-	+	+	+	Gld2
chr3L	9410025	9410225	201	*	6.12215	5.48685	6.56171	-0.545286	0.0299625	0.230519	69.59	45.5	19.44	110.1	113.71	59.59	2	2	+	+	-	-	+	+	CG4022
chr3R	10665025	10665225	201	*	5.17646	4.61797	5.57808	-0.539467	0.0300476	0.230749	31.63	14.82	27.22	57.31	52.72	33.28	3	3	+	+	+	+	+	+
chr3R	7035907	7036107	201	*	6.26358	5.65044	6.69249	-0.544269	0.0300573	0.230749	36.69	86.77	27.22	84.46	115.77	110.05	1	2	+	-	-	-	+	+	FBgn0266238
chr3L	15544941	15545141	201	*	5.9813	5.35724	6.4155	-0.544489	0.0300612	0.230749	40.49	53.97	28.52	84.46	129.21	42.41	1	2	+	-	-	+	+	-	CrebA
chr3L	7907147	7907347	201	*	5.31585	4.73164	5.73051	-0.542432	0.0300625	0.230749	44.28	21.16	14.26	66.36	40.31	52.61	0	2	-	-	-	-	+	+	pbl
chrX	10101803	10102003	201	*	5.78913	5.16966	6.22112	-0.544045	0.0300681	0.230749	31.63	58.2	18.15	82.95	92	48.85	0	2	-	-	-	-	+	+	RhoU
chrX	5308887	5309087	201	*	5.01165	4.3507	5.46323	-0.544964	0.0301102	0.230956	24.04	30.69	6.48	52.79	52.72	26.84	0	3	-	-	-	+	+	+	snf
chrX	7521987	7522187	201	*	5.2896	4.68756	5.71309	-0.542374	0.0301393	0.230971	20.24	40.21	16.85	54.29	69.26	33.82	0	2	-	-	-	-	+	+	CG32719
chr3L	16854373	16854573	201	*	5.4287	4.91558	5.80643	-0.531828	0.0301424	0.230971	39.22	25.4	25.93	66.36	53.75	47.78	3	3	+	+	+	+	+	+	Rh4
chrX	7947064	7947264	201	*	5.19938	4.53855	5.6509	-0.544918	0.0301619	0.230971	32.89	26.46	10.37	42.23	81.66	26.84	2	3	+	+	-	+	+	+	l(1)G0193
chr3L	6217973	6218173	201	*	5.97137	5.39012	6.38455	-0.541575	0.0301727	0.230971	60.73	39.15	25.93	90.49	106.47	53.68	2	3	+	+	-	+	+	+	FBgn0002526
chr2L	2163727	2163927	201	*	6.0303	5.48055	6.4274	-0.537516	0.0302313	0.231302	49.34	56.09	28.52	90.49	105.44	62.27	3	3	+	+	+	+	+	+	aop
chr3L	129283	129483	201	*	6.35761	5.76783	6.77506	-0.542335	0.0302643	0.231439	80.97	53.97	28.52	101.05	141.62	85.9	2	3	+	+	-	+	+	+	Pdk1
chr3L	7931700	7931900	201	*	5.50408	4.89845	5.92934	-0.542648	0.0303204	0.231567	27.83	48.68	12.96	54.29	77.53	51	3	3	+	+	+	+	+	+	syd
chr3L	21916324	21916524	201	*	5.22155	4.52008	5.6915	-0.543947	0.0303245	0.231567	15.18	38.1	15.56	48.26	84.76	22.01	1	1	+	-	-	-	-	+	mub
chr3R	24162888	24163088	201	*	5.5427	4.86502	6.00196	-0.544241	0.0303266	0.231567	45.55	32.81	9.07	66.36	89.93	35.97	1	2	+	-	-	+	+	-	Apc2
chr3L	21026306	21026506	201	*	7.39093	6.72002	7.8471	-0.544036	0.0303688	0.231773	196.1	70.9	49.26	197.57	295.64	197.56	3	3	+	+	+	+	+	+	skd
chr3R	21626532	21626732	201	*	6.38287	5.83593	6.77852	-0.537476	0.0303951	0.231858	75.91	53.97	41.48	104.06	143.68	81.6	1	2	-	+	-	+	+	-	E2f1
chr2R	25222985	25223185	201	*	6.44825	5.92859	6.82949	-0.532948	0.0304264	0.231889	56.93	80.43	45.37	122.16	97.17	121.86	2	3	+	+	-	+	+	+	CG9380
[truncated: 17,375 more rows]

## Sheet: CLAMP_MTD_CLAMPi_out_2-4hr_all
seqnames	start	end	width	strand	Conc	Conc_CLAMPi	Conc_MTD	Fold	p.value	FDR	CLRNAi_2.4hr_1	CLRNAi_2.4hr_2	CLRNAi_2.4hr_3	MTD_2.4hr_1	MTD_2.4hr_2	MTD_2.4hr_3	Called1	Called2	CLRNAi_2.4hr_1.1	CLRNAi_2.4hr_2.1	CLRNAi_2.4hr_3.1	MTD_2.4hr_1.1	MTD_2.4hr_2.1	MTD_2.4hr_3.1	anno_MTD_CLAMPi_all_gene
chr3R	24630113	24630313	201	*	7.41978	5.62506	8.19527	-2.30645	1.64389e-18	4.80985e-14	54.92	41.26	51.87	340.79	288.61	249.91	1	1	-	-	+	-	+	-	atl
chr3L	40459	40659	201	*	6.10344	7.10019	0	8.46715	3.62098e-12	5.29731e-08	92.59	90.55	228.48	0.93	0	0	3	3	+	+	+	+	+	+
chr3R	27461708	27461908	201	*	5.76819	6.57758	3.75387	2.25156	6.77231e-11	6.60504e-07	130.25	71.07	85.22	9.29	14.82	16.37	3	2	+	+	+	-	+	+	CG13978
chr3R	26753545	26753745	201	*	5.15485	6.05893	2.19632	2.82176	1.26754e-09	9.27172e-06	114.55	60.75	24.7	4.64	4.74	4.37	3	2	+	+	+	-	+	+
chr3L	14131724	14131924	201	*	7.18757	5.4836	7.9472	-1.94838	6.34687e-09	3.71406e-05	31.38	27.51	75.34	309.22	242.39	188.8	0	3	-	-	-	+	+	+	Sox21b
chr3R	16847310	16847510	201	*	7.79564	6.58343	8.44493	-1.57008	6.21312e-08	0.000301679	76.89	68.77	142.03	428.08	319.43	297.93	3	2	+	+	+	-	+	+	FBgn0020546
chr2L	18936180	18936380	201	*	7.4885	5.92336	8.22147	-1.80226	7.21745e-08	0.000301679	43.94	34.39	103.74	383.51	269.65	242.27	3	3	+	+	+	+	+	+	ssp3
chrX	12649934	12650134	201	*	7.08726	7.78242	5.6949	1.68813	9.69586e-08	0.000354614	298.16	121.5	240.83	40.86	54.52	60.02	1	1	-	+	-	-	+	-	Tomosyn
chr3R	26756496	26756696	201	*	5.20814	5.90527	3.80732	1.69183	1.40554e-07	0.00045694	70.62	57.31	51.87	17.64	11.26	13.1	2	3	+	-	+	+	+	+
chr3R	4012056	4012256	201	*	8.09129	8.72753	6.92552	1.5128	1.86441e-07	0.000535268	431.54	458.5	381.62	68.72	174.83	121.14	1	1	-	+	-	-	+	-
chr3R	4835366	4835566	201	*	7.42909	6.32676	8.04661	-1.4674	2.01235e-07	0.000535268	81.6	49.29	109.92	272.08	248.31	272.83	1	1	-	+	-	+	-	-
chr3L	13653075	13653275	201	*	5.28199	5.97082	3.91621	1.63605	2.96567e-07	0.000705277	72.19	65.34	50.64	11.14	17.78	16.37	1	2	-	-	+	+	+	-	bru3
chr2L	15653040	15653240	201	*	6.47955	7.19166	5.01284	1.70816	3.1336e-07	0.000705277	214.99	111.19	112.39	41.79	20.15	34.92	3	3	+	+	+	+	+	+	CG4587
chr2R	9692821	9693021	201	*	7.30403	6.2428	7.90883	-1.41351	6.04095e-07	0.00126252	75.32	80.24	71.63	334.29	210.98	175.7	3	3	+	+	+	+	+	+	Uba1
chr2R	20903568	20903768	201	*	7.80113	6.4033	8.49757	-1.63821	6.69792e-07	0.0013065	75.32	69.92	108.68	603.58	261.35	219.36	3	2	+	+	+	-	+	+	otp
chr3R	26754258	26754458	201	*	5.03175	5.72105	3.66403	1.61435	1.0517e-06	0.00188677	58.06	61.9	38.29	14.86	10.07	13.1	3	3	+	+	+	+	+	+
chrX	10472663	10472863	201	*	7.15428	5.66216	7.87194	-1.67073	1.09625e-06	0.00188677	50.22	26.36	75.34	353.79	189.64	159.33	2	3	+	-	+	+	+	+	CG2889
chr2L	4301485	4301685	201	*	5.51616	6.17697	4.26129	1.51617	1.58135e-06	0.00255849	97.29	64.19	55.58	17.64	21.33	18.55	2	1	+	-	+	+	-	-	tutl
chrX	11397489	11397689	201	*	4.95939	3.54102	5.6606	-1.62778	1.66141e-06	0.00255849	15.69	6.88	12.35	53.86	50.97	46.93	2	3	+	-	+	+	+	+	dlg1
chrX	19546722	19546922	201	*	7.03021	6.05255	7.60765	-1.32289	1.98517e-06	0.00290421	70.62	47	81.51	198.72	159.42	226.99	3	2	+	+	+	-	+	+	CG32532
chr2R	9521319	9521519	201	*	6.62096	7.28628	5.34896	1.52772	2.14413e-06	0.00298739	229.11	132.96	106.21	38.07	29.63	54.57	1	2	+	-	-	+	-	+	brp
chr3R	28324935	28325135	201	*	6.63831	5.68516	7.20732	-1.28379	3.28346e-06	0.00436685	43.94	57.31	53.11	159.72	115.56	168.06	1	2	-	-	+	+	+	-	larp
chr3L	5770873	5771073	201	*	7.71479	6.62965	8.32706	-1.38748	3.47483e-06	0.00442044	97.29	83.68	116.09	482.87	273.2	207.35	3	3	+	+	+	+	+	+	Ppat-Dpck
chrX	17606242	17606442	201	*	4.45549	2.33471	5.27931	-1.73132	4.06929e-06	0.00496098	3.14	4.58	7.41	58.5	29.63	28.37	2	3	+	-	+	+	+	+	X11L
chr3R	26759745	26759945	201	*	4.97453	5.68272	3.52545	1.56187	5.64871e-06	0.00661102	73.75	47	33.35	9.29	8.89	16.37	3	3	+	+	+	+	+	+	FBgn0267122
chr3L	3793002	3793202	201	*	4.56931	5.2673	3.16489	1.52621	6.52366e-06	0.00734137	37.66	30.95	46.93	9.29	8.89	8.73	1	1	-	-	+	-	+	-	CG32264
chr3R	21808723	21808923	201	*	6.58967	5.50195	7.20273	-1.34642	9.13876e-06	0.00959939	42.37	35.53	58.05	202.43	109.64	129.87	1	2	-	-	+	+	+	-	CASK
chrX	19338868	19339068	201	*	5.21529	5.94485	3.66679	1.53988	9.23667e-06	0.00959939	103.57	35.53	45.7	9.29	12.45	16.37	2	3	-	+	+	+	+	+	nAChRalpha7
chr3L	6742293	6742493	201	*	7.59435	6.71261	8.13764	-1.20023	9.51442e-06	0.00959939	102	92.85	119.8	390.94	233.5	220.45	1	1	-	-	+	-	+	-	dikar
chr4	989482	989682	201	*	7.75506	6.85323	8.30576	-1.21317	1.08832e-05	0.0106144	123.97	72.21	150.67	377.94	310.54	260.83	3	3	+	+	+	+	+	+	toy
chr3L	13539678	13539878	201	*	5.37638	5.97406	4.33752	1.30131	1.13127e-05	0.0106773	73.75	64.19	50.64	21.36	20.74	18.55	3	3	+	+	+	+	+	+	bru3
chr3L	12433798	12433998	201	*	5.86005	4.52572	6.5412	-1.44523	1.22073e-05	0.0109512	18.83	20.63	29.64	141.15	78.23	60.02	3	3	+	+	+	+	+	+	toe
chrX	15860590	15860790	201	*	7.17008	5.45389	7.93192	-1.52979	1.23514e-05	0.0109512	31.38	30.95	69.16	455.94	186.09	90.58	2	2	+	-	+	+	+	-	Gbeta13F
chrX	9155700	9155900	201	*	6.53028	5.311	7.18151	-1.39325	1.3572e-05	0.0116795	50.22	35.53	33.35	227.5	104.3	103.68	2	2	-	+	+	+	+	-	His3.3B
chr3R	25552569	25552769	201	*	4.98277	5.6446	3.72404	1.40177	1.4238e-05	0.01182	70.62	42.41	37.05	15.79	11.85	12	2	3	-	+	+	+	+	+	msi
chr3R	22506332	22506532	201	*	4.40915	5.10545	3.01194	1.45249	1.45432e-05	0.01182	37.66	29.8	35.82	8.36	7.11	8.73	0	2	-	-	-	+	+	-	Octbeta1R
chr3L	23165652	23165852	201	*	4.74779	5.53244	2.89742	1.43232	2.0533e-05	0.0160603	56.49	68.77	13.59	9.29	6.52	6.55	1	1	-	-	+	-	+	-
chrX	6855685	6855885	201	*	6.76076	5.78208	7.33854	-1.23321	2.08582e-05	0.0160603	62.77	34.39	67.93	198.72	128.6	158.24	2	0	+	+	-	-	-	-	CG14434
chr2R	7300777	7300977	201	*	6.69804	5.20568	7.41575	-1.41663	2.19585e-05	0.016474	43.94	14.9	51.87	274.86	138.08	99.31	0	3	-	-	-	+	+	+	pwn
chr3L	5504754	5504954	201	*	4.86278	5.48021	3.76078	1.28794	2.39201e-05	0.0174969	42.37	45.85	45.7	16.71	13.04	10.91	1	2	+	-	-	-	+	+	CG34342
chrX	13080505	13080705	201	*	5.18285	3.9691	5.83256	-1.32291	2.7291e-05	0.0194758	17.26	14.9	14.82	78.93	52.74	39.29	1	2	-	-	+	+	-	+	hep
chr3L	13615170	13615370	201	*	5.03885	5.71618	3.71985	1.34752	2.82602e-05	0.0196873	81.6	37.83	38.29	10.21	11.85	17.46	2	3	+	-	+	+	+	+	bru3
chr3R	9808991	9809191	201	*	7.171	6.49763	7.62829	-0.973868	3.17266e-05	0.0215881	108.28	82.53	80.28	215.43	192.6	185.52	3	3	+	+	+	+	+	+	FBXO11
chr3L	3765845	3766045	201	*	6.37704	4.21508	7.20612	-1.22375	3.37683e-05	0.0224541	17.26	13.75	24.7	323.15	93.64	26.19	1	1	-	-	+	+	-	-	CG32264
chrX	11268422	11268622	201	*	4.76632	2.61625	5.5939	-1.22799	3.50241e-05	0.0224541	3.14	10.32	4.94	94.72	27.26	22.92	3	3	+	+	+	+	+	+	CG44422
chr3L	10166545	10166745	201	*	5.59771	6.25039	4.37311	1.2887	3.53016e-05	0.0224541	100.43	85.97	41.99	14.86	25.48	21.83	3	3	+	+	+	+	+	+	CG6628
chrX	15453292	15453492	201	*	6.09591	5.00184	6.71091	-1.23488	4.03897e-05	0.0251439	39.23	14.9	41.99	114.22	100.75	99.31	2	2	+	-	+	+	+	-	CG11655
chr3L	23164743	23164943	201	*	6.4693	7.03962	5.51236	1.16238	4.17901e-05	0.0254737	178.89	131.82	83.98	41.79	43.85	51.29	1	1	-	-	+	-	+	-
chr3L	12609405	12609605	201	*	9.31276	8.40559	9.8654	-1.11025	5.39197e-05	0.0321967	287.17	204.03	526.12	1112.45	865.24	820.67	3	3	+	+	+	+	+	+	caup
chrX	11954383	11954583	201	*	4.73365	5.4056	3.43594	1.2314	5.67617e-05	0.0332158	61.2	41.26	24.7	12.07	9.48	10.91	1	2	+	-	-	-	+	+	cac
chr2R	6417062	6417262	201	*	5.82454	6.54016	4.34183	1.2305	5.83193e-05	0.0334581	169.48	50.43	59.28	13.93	27.26	19.64	2	2	+	+	-	+	-	+
chrX	13137315	13137515	201	*	5.65756	6.29069	4.50257	1.18043	6.67848e-05	0.037578	106.71	51.58	76.57	13.93	21.33	32.74	3	2	+	+	+	-	+	+	CG32645
chr2L	20205160	20205360	201	*	5.46704	6.23252	3.73039	1.12297	7.18685e-05	0.0393574	106.71	91.7	27.17	4.64	10.07	25.1	1	1	-	-	+	-	+	-
chrX	12640755	12640955	201	*	6.47465	7.08035	5.41061	1.14235	7.26374e-05	0.0393574	202.43	82.53	121.03	33.43	38.52	55.66	3	3	+	+	+	+	+	+	Tomosyn
chr2L	22024551	22024751	201	*	8.40207	7.56446	8.92858	-1.02708	8.19259e-05	0.0435831	214.99	131.82	221.07	689.94	444.47	327.4	2	2	+	-	+	+	+	-	tio
chr2L	12863131	12863331	201	*	6.1108	6.69126	5.12424	1.08288	8.96098e-05	0.0468195	134.95	83.68	91.39	49.22	31.41	24.01	3	3	+	+	+	+	+	+
chr3L	1178136	1178336	201	*	7.28743	6.28954	7.87169	-1.07306	9.86871e-05	0.0501953	62.77	60.75	111.15	352.86	186.09	163.7	1	3	-	-	+	+	+	+	bab2
chr3L	19907440	19907640	201	*	6.17603	5.26593	6.72974	-1.04258	9.9502e-05	0.0501953	47.08	26.36	41.99	133.72	99.56	85.12	1	1	-	-	+	+	-	-	Su(Tpl)
chr3R	24272845	24273045	201	*	7.28691	6.41272	7.82737	-1.00594	0.000112603	0.0558417	98.86	65.34	91.39	325.01	152.31	204.08	3	3	+	+	+	+	+	+	jar
chr3L	15141780	15141980	201	*	6.44536	5.57183	6.98557	-0.99349	0.000123263	0.0601093	53.35	42.41	46.93	175.5	110.82	93.85	3	2	+	+	+	-	+	+	Pex3
chr3L	14463631	14463831	201	*	5.06832	3.78261	5.7372	-1.04525	0.00013373	0.0641442	14.12	16.05	11.12	26.93	54.52	78.58	1	1	-	-	+	+	-	-	bbg
chr3L	14003620	14003820	201	*	6.60495	5.86908	7.0899	-0.904779	0.00013593	0.0641481	59.63	52.73	62.99	169.93	120.9	117.86	3	1	+	+	+	-	-	+	Nprl3
chrX	17802416	17802616	201	*	6.4768	5.69571	6.98074	-0.928648	0.000140629	0.0644168	53.35	36.68	65.46	141.15	122.08	115.68	1	1	-	-	+	-	+	-	OdsH
chr2L	22261113	22261313	201	*	6.03463	6.68153	4.83106	1.03562	0.000140903	0.0644168	153.79	98.58	55.58	15.79	31.41	38.2	3	2	+	+	+	-	+	+
chr3L	25225283	25225483	201	*	6.17951	6.7484	5.22668	0.986835	0.000150857	0.0679066	133.39	124.94	64.22	28.79	42.08	41.47	3	3	+	+	+	+	+	+
chr3L	16176936	16177136	201	*	5.0683	4.00716	5.67308	-0.995781	0.000159263	0.0706044	7.85	20.63	19.76	56.64	46.23	50.2	1	1	-	-	+	-	+	-	FBgn0267318
chrX	17314300	17314500	201	*	6.89963	5.99276	7.45217	-0.957458	0.000165106	0.0711732	53.35	40.12	97.57	212.65	158.82	153.88	1	2	-	-	+	+	+	-	B-H2
chr2R	8018902	8019102	201	*	8.45857	7.69634	8.95469	-0.894871	0.000165412	0.0711732	235.39	139.84	247	687.15	417.21	384.15	3	2	+	+	+	-	+	+	FBgn0266805
chrX	20411725	20411925	201	*	5.76731	4.76991	6.3514	-0.980773	0.000168234	0.07132	37.66	19.49	24.7	109.57	76.45	58.93	2	3	-	+	+	+	+	+	HERC2
chr3R	30781888	30782088	201	*	7.53766	7.01069	7.9228	-0.715413	0.000170689	0.07132	141.23	113.48	132.15	259.08	236.46	232.45	2	3	+	-	+	+	+	+	zfh1
chrX	361563	361763	201	*	5.23006	3.46517	6.00047	-0.824593	0.000174422	0.07132	25.11	8.02	0	72.43	70.52	49.11	1	1	+	-	-	-	-	+	CG32816
chrX	8049361	8049561	201	*	5.92376	4.93079	6.50637	-0.968172	0.000175503	0.07132	26.68	24.07	40.76	127.22	73.49	72.03	2	3	+	-	+	+	+	+	fs(1)h
chrX	12649519	12649719	201	*	7.05224	7.58855	6.18906	0.922389	0.00018485	0.0740893	257.36	108.89	211.19	63.14	71.71	84.03	3	3	+	+	+	+	+	+	Tomosyn
chrX	14701956	14702156	201	*	4.36182	5.07753	2.8787	0.901641	0.000191865	0.0758618	40.8	32.09	28.41	1.86	7.11	13.1	3	3	+	+	+	+	+	+	NetB
chr3L	11927353	11927553	201	*	7.07033	6.4423	7.50643	-0.779627	0.000200828	0.0783469	83.17	81.38	96.33	208.93	149.94	186.62	2	3	+	-	+	+	+	+	byn
chr2R	6372139	6372339	201	*	4.62634	3.50187	5.25052	-0.946329	0.000204882	0.0788768	12.55	10.32	11.12	28.79	45.04	40.38	2	1	+	-	+	+	-	-
chr3R	22375137	22375337	201	*	5.11344	4.09905	5.70317	-0.920866	0.000223302	0.0848518	15.69	17.19	18.53	34.36	65.19	56.75	3	3	+	+	+	+	+	+	CG7069
chr3R	1038414	1038614	201	*	4.56321	5.23602	3.26212	0.906862	0.000228834	0.0858391	45.51	36.68	30.88	4.64	15.41	8.73	2	0	+	-	+	-	-	-	Myo81F
chrX	5340049	5340249	201	*	7.03889	5.75427	7.70749	-0.895175	0.000234835	0.086975	45.51	43.56	72.87	394.65	144.01	88.4	3	3	+	+	+	+	+	+	SK
chr3L	24280530	24280730	201	*	5.24101	5.82704	4.23781	0.894419	0.000247644	0.0905727	83.17	38.97	48.17	16.71	21.33	18.55	2	2	+	-	+	-	+	+	Snap25
chr2L	9874693	9874893	201	*	5.66371	6.27106	4.59437	0.887245	0.000260836	0.0942197	105.14	88.26	38.29	29.71	23.11	19.64	1	1	-	+	-	-	+	-	nAChRalpha6
chr3R	28196590	28196790	201	*	5.13176	5.74192	4.05344	0.882071	0.000266192	0.0945749	80.03	44.7	35.82	19.5	10.67	19.64	3	3	+	+	+	+	+	+	CG34354
chr3R	16403774	16403974	201	*	7.70916	7.13372	8.11941	-0.704711	0.000270922	0.0945749	153.79	102.02	165.49	274.86	276.76	282.65	3	3	+	+	+	+	+	+	ss
chrX	19641007	19641207	201	*	5.98009	5.223	6.47406	-0.812992	0.000271516	0.0945749	34.52	35.53	41.99	101.22	91.26	74.21	1	2	-	+	-	-	+	+	CG12237
chr2R	9577422	9577622	201	*	7.01553	5.70599	7.69049	-0.84121	0.000279472	0.095669	32.95	61.9	61.75	400.22	125.64	93.85	0	2	-	-	-	-	+	+	CG1814
chr2L	9698493	9698693	201	*	5.92508	5.0097	6.48069	-0.854999	0.000281197	0.095669	31.38	34.39	30.88	128.15	69.93	69.84	0	2	-	-	-	-	+	+	Pka-C1
chr3L	25229966	25230166	201	*	6.60116	7.08592	5.86576	0.781444	0.000302713	0.101805	150.65	111.19	145.73	72.43	61.04	41.47	1	1	+	-	-	-	-	+
chrX	13739620	13739820	201	*	7.86816	6.94397	8.42694	-0.828919	0.00031935	0.10618	114.55	74.51	180.31	520.94	264.9	246.64	1	1	-	-	+	+	-	-	Grip91
chr3R	6849973	6850173	201	*	7.4963	6.6557	8.02396	-0.807909	0.00032545	0.106239	87.88	67.63	146.97	341.72	260.16	178.98	0	2	-	-	-	-	+	+	Scr
chrX	21033375	21033575	201	*	5.31165	4.38534	5.87118	-0.821764	0.00032679	0.106239	15.69	30.95	16.06	63.14	55.71	56.75	2	0	+	+	-	-	-	-	CG1529
chrX	12648352	12648552	201	*	5.5485	6.13553	4.54226	0.821148	0.000339444	0.10914	95.72	43.56	71.63	14.86	26.67	28.37	2	2	-	+	+	-	+	+	Tomosyn
chr2R	5260591	5260791	201	*	5.54062	6.13192	4.52144	0.818607	0.000343416	0.109217	109.85	57.31	43.23	19.5	24.3	25.1	3	2	+	+	+	-	+	+	d4
chr2L	3538637	3538837	201	*	6.73788	5.89258	7.26735	-0.792357	0.000353608	0.11125	62.77	40.12	75.34	207.07	148.16	106.95	3	3	+	+	+	+	+	+	drm
chrX	10137251	10137451	201	*	4.96522	5.55337	3.95562	0.805757	0.000361353	0.111524	58.06	30.95	51.87	10.21	17.78	18.55	3	3	+	+	+	+	+	+	RhoU
chr2L	22206440	22206640	201	*	5.79369	6.33084	4.92829	0.789812	0.000362168	0.111524	91.02	50.43	100.04	28.79	32	30.56	3	2	+	+	+	-	+	+	Ir40a
chr3R	16763657	16763857	201	*	6.04771	4.90299	6.67786	-0.792487	0.000368002	0.111524	25.11	26.36	38.29	169.93	85.93	51.29	1	2	-	-	+	+	+	-	FBgn0020556
chr2R	23236952	23237152	201	*	4.70282	3.61277	5.31659	-0.793839	0.000372993	0.111524	14.12	11.46	11.12	26	44.45	49.11	1	1	-	+	-	-	+	-
chr2L	15467182	15467382	201	*	5.62301	6.22772	4.5621	0.795989	0.000373538	0.111524	119.26	56.17	49.4	18.57	19.56	32.74	1	1	-	-	+	-	+	-
chr2L	18010354	18010554	201	*	5.06211	5.67458	3.97629	0.781737	0.000393022	0.116156	80.03	43.56	29.64	12.07	16.59	18.55	1	3	-	-	+	+	+	+	elfless
chrX	1399716	1399916	201	*	7.62203	6.30702	8.29837	-0.723459	0.000414885	0.121391	53.35	29.8	154.38	512.58	244.16	187.71	3	3	+	+	+	+	+	+
chr2R	8065519	8065719	201	*	7.14443	6.34414	7.65616	-0.733892	0.00043881	0.126478	72.19	81.38	90.16	305.51	152.31	147.33	1	1	-	-	+	+	-	-	lig
chr2R	12904456	12904656	201	*	8.08574	7.557	8.47183	-0.598316	0.000440917	0.126478	185.17	167.35	212.42	440.15	305.2	319.76	0	2	-	-	-	+	+	-	FBgn0265654
chrX	8832024	8832224	201	*	4.94172	5.56068	3.83465	0.731791	0.00046562	0.132268	72.19	28.66	40.76	10.21	11.85	20.74	0	3	-	-	-	+	+	+
chrX	5561724	5561924	201	*	5.64024	6.21369	4.67424	0.730218	0.000487664	0.136298	102	52.73	67.93	15.79	23.71	37.1	2	3	+	-	+	+	+	+	Vsx2
chrX	3861248	3861448	201	*	7.36955	6.63986	7.85185	-0.689373	0.000492849	0.136298	98.86	60.75	139.56	268.36	208.61	216.08	2	2	+	-	+	+	+	-	FBgn0019661
chr3R	30820166	30820366	201	*	6.04303	5.37763	6.49666	-0.663274	0.000493782	0.136298	43.94	41.26	39.52	96.57	85.93	88.4	0	2	-	-	-	+	+	-	cindr
chr3L	2795340	2795540	201	*	4.8926	5.44907	3.97483	0.719241	0.000504675	0.138003	53.35	33.24	44.46	18.57	16.59	12	0	2	-	-	-	+	+	-	Tet
chr2L	1759032	1759232	201	*	5.71182	6.1916	4.98795	0.677391	0.000515379	0.138657	81.6	72.21	65.46	26	33.19	36.01	0	2	-	-	-	+	+	-	CG17650
chr3L	26377204	26377404	201	*	4.45979	5.05512	3.42822	0.711039	0.000517514	0.138657	23.54	36.68	39.52	10.21	10.07	12	1	1	-	+	-	-	-	+
chr2R	11600195	11600395	201	*	6.04806	5.06936	6.62586	-0.713137	0.000521286	0.138657	29.82	25.22	45.7	147.65	85.34	63.3	1	1	-	-	+	+	-	-	tou
chr2L	1264081	1264281	201	*	5.19922	5.69336	4.44172	0.66602	0.00057032	0.148959	51.79	51.58	51.87	18.57	23.71	22.92	3	3	+	+	+	+	+	+	robo3
chr2L	9633613	9633813	201	*	4.43409	3.23822	5.07885	-0.658196	0.000577836	0.148959	7.85	6.88	13.59	44.57	28.45	28.37	0	2	-	-	-	+	+	-	Apoltp
chr2R	3775326	3775526	201	*	6.44871	6.94413	5.68813	0.662252	0.000577908	0.148959	169.48	97.43	102.51	51.07	61.04	42.56	3	3	+	+	+	+	+	+
chr2L	4060764	4060964	201	*	5.41759	4.5117	5.96977	-0.685085	0.000580379	0.148959	15.69	20.63	32.11	75.22	66.97	45.84	3	3	+	+	+	+	+	+	ed
chr3L	13653581	13653781	201	*	5.12067	5.74992	3.97903	0.658042	0.000600831	0.152867	94.15	40.12	27.17	16.71	14.22	16.37	1	1	-	+	-	-	+	-	bru3
chrX	13200908	13201108	201	*	4.86756	3.89186	5.44433	-0.670441	0.00061449	0.153833	15.69	10.32	18.53	55.72	43.26	31.65	2	3	+	-	+	+	+	+	sno
chrX	18093775	18093975	201	*	4.78136	3.83229	5.34894	-0.669278	0.000618801	0.153833	18.83	10.32	13.59	47.36	43.26	31.65	2	3	+	-	+	+	+	+	RhoGAP16F
chr2R	3648710	3648910	201	*	4.83591	5.49766	3.57748	0.622721	0.0006204	0.153833	76.89	24.07	34.58	6.5	11.85	17.46	1	3	-	+	-	+	+	+
chr2R	24891413	24891613	201	*	7.08915	6.34947	7.57574	-0.634759	0.0006501	0.159316	94.15	50.43	100.04	238.65	148.16	185.52	3	3	+	+	+	+	+	+	Ance-5
chr2L	6316738	6316938	201	*	5.92821	6.442	5.12283	0.645137	0.000653402	0.159316	103.57	58.46	98.8	29.71	42.08	32.74	1	2	-	+	-	-	+	+	Ddr
chr2R	16007591	16007791	201	*	6.76856	5.97986	7.2756	-0.635766	0.000677379	0.163797	54.92	50.43	83.98	215.43	138.08	111.31	3	3	+	+	+	+	+	+	Ufc1
chr3L	13667357	13667557	201	*	6.97911	6.08365	7.52748	-0.625089	0.000740056	0.174753	76.89	40.12	86.45	280.43	147.56	125.5	3	2	+	+	+	-	+	+	bru3
chr2R	8866354	8866554	201	*	5.04361	4.09751	5.61015	-0.622357	0.000745029	0.174753	20.4	14.9	16.06	29.71	55.71	61.11	1	3	-	-	+	+	+	+	RyR
chr3L	9854666	9854866	201	*	6.69986	6.1401	7.10214	-0.535418	0.000748627	0.174753	83.17	64.19	64.22	138.36	136.3	137.51	3	2	+	+	+	-	+	+	RasGAP1
chrX	15142099	15142299	201	*	6.20369	6.73753	5.34701	0.620377	0.000749956	0.174753	145.94	79.09	95.1	26.93	37.34	57.84	0	2	-	-	-	+	+	-	RpL37a
chrX	18495587	18495787	201	*	5.27333	4.48599	5.77982	-0.613234	0.00075255	0.174753	28.25	22.92	16.06	61.29	53.34	50.2	1	1	-	-	+	+	-	-	CG15043
chr2R	16517099	16517299	201	*	6.758	6.20891	7.15476	-0.523142	0.000763248	0.175841	73.75	80.24	67.93	155.07	139.27	133.14	2	3	+	-	+	+	+	+	Sema2a
chrX	17802094	17802294	201	*	4.73774	3.74077	5.3217	-0.605569	0.000782504	0.178869	17.26	8.02	14.82	48.29	30.22	41.47	3	3	+	+	+	+	+	+	OdsH
chr3R	7886057	7886257	201	*	5.72372	6.2272	4.94373	0.597356	0.000796656	0.180693	103.57	61.9	59.28	30.64	27.85	33.83	2	3	+	-	+	+	+	+	CG17816
chr3L	2174628	2174828	201	*	4.31868	3.12806	4.96197	-0.573022	0.000803377	0.180815	4.71	9.17	12.35	27.86	29.63	36.01	3	3	+	+	+	+	+	+	FBgn0035311
chr3R	24799553	24799753	201	*	6.64746	5.45082	7.29244	-0.555818	0.000835106	0.186522	32.95	22.92	75.34	265.58	125.04	79.67	2	2	+	+	-	-	+	+	Ude
chr3L	27104965	27105165	201	*	5.1812	5.69835	4.36739	0.584824	0.000852319	0.188924	65.91	51.58	38.29	18.57	23.71	19.64	3	2	+	+	+	-	+	+
chr3L	3793309	3793509	201	*	5.41572	5.92981	4.60957	0.578639	0.000879823	0.191975	78.46	55.02	49.4	18.57	21.93	32.74	1	2	-	-	+	+	+	-	CG32264
chr2L	4440699	4440899	201	*	5.49879	4.18833	6.17398	-0.515506	0.000879928	0.191975	14.12	18.34	22.23	142.07	38.52	36.01	1	2	-	-	+	+	+	-	CG15431
chr3L	24287834	24288034	201	*	5.47876	6.03772	4.55405	0.579898	0.000885764	0.191975	92.59	69.92	34.58	21.36	20.74	28.37	1	1	-	-	+	+	-	-	Snap25
chr3L	6904174	6904374	201	*	8.45719	7.94565	8.83407	-0.468802	0.000925369	0.197752	280.89	200.59	258.12	575.72	399.43	393.97	1	1	+	-	-	-	-	+
chr2L	3730290	3730490	201	*	6.25138	4.28676	7.05361	-0.331149	0.000925937	0.197752	15.69	20.63	22.23	342.65	37.34	18.55	1	1	-	-	+	+	-	-	CG10019
chr3R	2169917	2170117	201	*	5.20399	5.78028	4.2297	0.563513	0.000940542	0.199415	64.34	57.31	43.23	9.29	28.45	18.55	3	3	+	+	+	+	+	+	Myo81F
chr3L	10357918	10358118	201	*	4.57241	5.18253	3.49418	0.54145	0.000964741	0.203075	50.22	38.97	19.76	8.36	11.26	14.19	2	2	+	+	-	-	+	+	FBgn0267668
chrX	356645	356845	201	*	4.9359	5.47172	4.07403	0.551417	0.000997449	0.20846	56.49	47	29.64	15.79	18.37	16.37	2	0	-	+	+	-	-	-	y
chr3R	30404832	30405032	201	*	4.9704	5.58487	3.87809	0.529178	0.00101065	0.208781	54.92	61.9	27.17	6.5	20.15	17.46	1	1	-	-	+	+	-	-	FBgn0267130
chr2L	15910008	15910208	201	*	6.20431	4.31706	6.99481	-0.332383	0.00101326	0.208781	7.85	14.9	37.05	286.93	78.23	17.46	2	2	-	+	+	+	+	-	beat-Ib
chr2L	21628739	21628939	201	*	6.25225	5.36702	6.79684	-0.534497	0.00106992	0.218915	54.92	19.49	49.4	145.79	97.19	90.58	3	3	+	+	+	+	+	+	Df31
chr2R	1706959	1707159	201	*	5.04541	4.1452	5.59551	-0.527368	0.00109804	0.221816	23.54	17.19	12.35	65	46.23	33.83	1	1	-	-	+	-	+	-	CG41520
chr3R	24230744	24230944	201	*	7.21793	6.65601	7.62131	-0.464642	0.0011012	0.221816	103.57	93.99	104.98	252.58	176.6	161.52	3	3	+	+	+	+	+	+	Spase22-23
chr2L	2364326	2364526	201	*	7.45463	6.50316	8.02305	-0.521455	0.00111343	0.221816	73.75	53.87	144.5	403.01	231.13	146.24	1	2	-	-	+	+	+	-	Rab5
chr2L	11942373	11942573	201	*	5.02407	3.59688	5.7273	-0.424211	0.00111622	0.221816	10.98	8.02	17.29	106.79	31.41	20.74	3	2	+	+	+	-	+	+	Crys
chr2R	9520774	9520974	201	*	4.61195	5.24539	3.45591	0.48213	0.00112201	0.221816	50.22	40.12	23.47	5.57	7.7	19.64	3	3	+	+	+	+	+	+	brp
chr3L	25626947	25627147	201	*	5.12514	5.6655	4.25121	0.516782	0.00115398	0.226606	64.34	44.7	43.23	13	26.67	17.46	3	2	+	+	+	-	+	+	lovit
chr3R	8805522	8805722	201	*	6.79661	6.12195	7.25449	-0.486363	0.00120258	0.234575	61.2	53.87	93.86	192.22	139.27	126.59	0	2	-	-	-	+	+	-	CCT7
chrX	3448009	3448209	201	*	4.56503	5.13058	3.62177	0.494638	0.00125006	0.241824	40.8	30.95	33.35	7.43	14.22	15.28	3	3	+	+	+	+	+	+	CG12535
chr2L	7659617	7659817	201	*	4.78046	3.49665	5.44884	-0.435519	0.00125627	0.241824	7.85	14.9	11.12	79.86	26.08	25.1	3	3	+	+	+	+	+	+	Slob
chr3R	25094716	25094916	201	*	7.60998	6.74354	8.14752	-0.492542	0.00127908	0.244605	94.15	47	180.31	332.43	273.79	244.46	3	3	+	+	+	+	+	+	fd96Cb
chrX	20644799	20644999	201	*	5.77986	6.37264	4.75613	0.476244	0.00129494	0.24584	131.82	55.02	61.75	13.93	27.85	39.29	3	2	+	+	+	-	+	+
chr3R	11909400	11909600	201	*	5.20435	5.74142	4.33916	0.486661	0.00131234	0.24584	76.89	52.73	30.88	20.43	19.56	20.74	1	2	-	-	+	+	+	-	Cad87A
chr3L	23082825	23083025	201	*	4.82531	5.36095	3.96387	0.484448	0.00132545	0.24584	53.35	37.83	32.11	12.07	18.37	16.37	1	1	-	-	+	+	-	-
chr3L	11298247	11298447	201	*	5.50006	6.00948	4.7055	0.482661	0.00132671	0.24584	87.88	58.46	46.93	33.43	21.93	22.92	1	2	-	-	+	+	+	-	CG6175
chr3R	25080522	25080722	201	*	7.42399	6.373	8.02555	-0.4662	0.00132755	0.24584	45.51	40.12	163.02	342.65	252.46	186.62	0	2	-	-	-	+	-	+	fd96Ca
chr2R	8061475	8061675	201	*	6.24565	5.44245	6.75856	-0.481532	0.00133774	0.24617	51.79	36.68	41.99	162.5	85.93	76.39	3	3	+	+	+	+	+	+	CG12769
chrX	8929177	8929377	201	*	4.46412	5.03263	3.51241	0.473923	0.00135844	0.248416	42.37	28.66	27.17	9.29	11.85	13.1	3	3	+	+	+	+	+	+	rdgA
chr3R	30263423	30263623	201	*	5.226	5.73424	4.43436	0.472258	0.00138466	0.251638	54.92	50.43	54.34	13	27.85	24.01	1	1	-	-	+	-	+	-
chr2R	9578263	9578463	201	*	5.72047	5.05836	6.17259	-0.449013	0.00142145	0.255379	34.52	32.09	33.35	82.64	62.82	70.94	3	3	+	+	+	+	+	+	CG1814
chrX	18654402	18654602	201	*	5.47865	4.81164	5.93302	-0.450485	0.0014227	0.255379	28.25	26.36	29.64	65	60.45	57.84	0	2	-	-	-	+	+	-	Ing3
chr3R	19156745	19156945	201	*	8.89073	8.36394	9.27577	-0.40073	0.00143954	0.256557	389.17	284.27	314.93	826.44	552.92	480.18	0	2	-	-	-	+	+	-	nos
chrX	23008806	23009006	201	*	5.32414	4.5297	5.83352	-0.463752	0.0014468	0.256557	25.11	19.49	24.7	72.43	60.45	38.2	3	3	+	+	+	+	+	+	FucTC
chr3L	1098719	1098919	201	*	6.55913	5.60815	7.12737	-0.456178	0.00145914	0.257187	51.79	38.97	55.58	221.93	137.49	60.02	1	1	-	-	+	-	+	-	bab1
chrX	21050117	21050317	201	*	5.23851	4.48644	5.73036	-0.45714	0.00147319	0.258109	26.68	18.34	22.23	65.93	48.6	44.74	3	3	+	+	+	+	+	+	Stt3A
chr2R	7544262	7544462	201	*	6.24009	5.37527	6.77703	-0.456769	0.00149371	0.260146	39.23	30.95	54.34	169.93	79.41	79.67	1	1	-	-	+	+	-	-	Corin
chrX	15624904	15625104	201	*	5.43541	5.97014	4.57639	0.44495	0.00157573	0.272807	80.03	56.17	51.87	12.07	27.85	31.65	3	3	+	+	+	+	+	+	sog
chr2R	330874	331074	201	*	4.16323	4.78939	3.03207	0.411338	0.00159754	0.274956	32.95	24.07	25.94	4.64	10.07	9.82	1	1	-	+	-	-	-	+	DIP-lambda
chr2R	9039483	9039683	201	*	6.00598	5.14204	6.54259	-0.438624	0.00161622	0.275755	51.79	34.39	19.76	130	77.63	72.03	1	2	-	-	+	+	+	-
chr2R	3581893	3582093	201	*	6.07969	6.56023	5.35407	0.431216	0.00162946	0.275755	128.68	79.09	75.34	30.64	46.23	45.84	0	2	-	-	-	+	+	-
chr3L	9129370	9129570	201	*	6.41571	5.7095	6.88776	-0.429825	0.00163046	0.275755	53.35	49.29	54.34	156	125.04	74.21	2	1	+	+	-	-	-	+	bol
chrX	717249	717449	201	*	5.82629	6.3132	5.08586	0.43157	0.00164924	0.277328	92.59	60.75	85.22	24.14	30.82	46.93	3	3	+	+	+	+	+	+	sdk
chr2R	20531592	20531792	201	*	5.25556	4.53269	5.73491	-0.423763	0.0016905	0.282642	20.4	20.63	28.41	61.29	51.56	46.93	3	3	+	+	+	+	+	+	CG18067
chr3R	21376388	21376588	201	*	7.91208	7.27909	8.35055	-0.404158	0.00172459	0.285343	150.65	122.65	192.66	468.94	276.76	233.54	3	2	+	+	+	-	+	+	mod(mdg4)
chrX	9876486	9876686	201	*	5.42043	3.88389	6.14752	-0.30506	0.00174657	0.285343	14.12	9.17	21	156	40.3	16.37	1	2	+	-	-	+	+	-	CG15247
chr2L	6874841	6875041	201	*	4.99616	3.42118	5.73112	-0.300405	0.00175362	0.285343	4.71	12.61	14.82	117	24.89	17.46	1	1	-	-	+	+	-	-	Nlg2
chr2R	24891898	24892098	201	*	6.4374	5.69331	6.92587	-0.415171	0.00177892	0.285343	37.66	44.7	72.87	163.43	103.12	98.22	2	2	+	+	-	-	+	+	Ance-5
chr2R	19779868	19780068	201	*	4.47683	5.05225	3.50509	0.408467	0.00179005	0.285343	40.8	22.92	35.82	7.43	12.45	14.19	3	3	+	+	+	+	+	+
chr2L	15879058	15879258	201	*	4.78074	5.37911	3.73975	0.400395	0.00179597	0.285343	62.77	43.56	18.53	12.07	16	12	3	1	+	+	+	-	-	+	FBgn0028935
chrX	9675007	9675207	201	*	5.53215	4.8234	6.00531	-0.409776	0.00179839	0.285343	29.82	21.78	33.35	77.07	54.52	61.11	2	3	+	-	+	+	+	+	nej
chr2R	14448977	14449177	201	*	5.48994	4.13387	6.17643	-0.336679	0.00181032	0.285343	14.12	12.61	25.94	151.36	36.15	29.47	1	2	-	-	+	+	+	-	Oaz
chr3R	19241773	19241973	201	*	6.81466	7.33585	5.99062	0.414402	0.00181426	0.285343	225.97	104.31	154.38	34.36	80	76.39	3	3	+	+	+	+	+	+	unc79
chrX	6549548	6549748	201	*	6.12265	5.40885	6.59803	-0.408447	0.0018167	0.285343	51.79	43.56	32.11	128.15	74.08	88.4	2	1	+	+	-	-	-	+	CG34417
chr3R	11331110	11331310	201	*	5.75241	6.35982	4.68286	0.3908	0.00182069	0.285343	122.4	89.41	34.58	13	30.22	33.83	3	3	+	+	+	+	+	+	pros
chrX	3779220	3779420	201	*	6.45616	5.75316	6.92678	-0.40635	0.00182368	0.285343	70.62	50.43	40.76	143.93	83.56	137.51	2	2	+	-	+	-	+	+	Tlk
chr3L	432648	432848	201	*	6.99466	6.19869	7.50465	-0.411692	0.00183579	0.285709	73.75	36.68	109.92	217.29	194.38	133.14	1	1	-	-	+	-	+	-
chrX	6545961	6546161	201	*	6.11535	5.34362	6.61542	-0.408467	0.00185757	0.287569	43.94	30.95	46.93	141.15	85.34	67.66	3	3	+	+	+	+	+	+	CG34417
chr3R	10368383	10368583	201	*	6.83478	5.9252	7.3883	-0.403729	0.00187699	0.289046	31.38	44.7	106.21	226.58	129.79	146.24	1	2	-	-	+	+	+	-	Rfx
chr3L	8187146	8187346	201	*	5.56376	4.9114	6.01135	-0.389758	0.00190242	0.291429	32.95	25.22	32.11	65	58.67	69.84	2	1	-	+	+	+	-	-	ERR
chrX	13263431	13263631	201	*	4.95817	4.17838	5.46157	-0.399339	0.00194479	0.296368	23.54	17.19	13.59	37.14	42.67	52.38	3	3	+	+	+	+	+	+	HDAC4
chrX	18489619	18489819	201	*	5.73524	4.23315	6.45504	-0.291565	0.00196657	0.297045	17.26	20.63	18.53	204.29	27.26	31.65	3	3	+	+	+	+	+	+	psh
chr3L	7345139	7345339	201	*	7.37102	6.83308	7.76196	-0.349871	0.00196954	0.297045	89.45	103.16	149.44	249.79	203.86	197.53	2	2	+	+	-	-	+	+	qm
chr2R	23426544	23426744	201	*	5.17044	3.87116	5.8428	-0.328861	0.00201231	0.301939	9.42	17.19	17.29	116.07	33.19	22.92	1	1	-	-	+	+	-	-	CG9815
chr3R	3284038	3284238	201	*	5.83973	6.34683	5.0509	0.3896	0.00203605	0.303943	100.43	89.41	54.34	21.36	42.08	36.01	2	3	+	-	+	+	+	+
chr2L	12404501	12404701	201	*	4.88481	2.85085	5.69695	-0.198791	0.00205233	0.304818	4.71	4.58	12.35	128.15	23.11	4.37	1	2	-	-	+	+	+	-	vir-1
chr2L	1037156	1037356	201	*	4.77216	5.35431	3.78055	0.375581	0.00206681	0.305418	64.34	27.51	30.88	8.36	15.41	17.46	2	2	+	-	+	-	+	+	IA-2
chrX	1685239	1685439	201	*	5.12096	5.61452	4.36485	0.383083	0.00208951	0.307221	64.34	33.24	49.4	20.43	19.56	21.83	3	3	+	+	+	+	+	+	CG32809
chr2R	14959036	14959236	201	*	6.5426	5.66701	7.08359	-0.376069	0.00215736	0.315611	43.94	34.39	74.1	212.65	110.23	84.03	3	3	+	+	+	+	+	+	aPKC
chr3R	8669475	8669675	201	*	7.22958	6.46982	7.72467	-0.374786	0.00218252	0.317703	76.89	63.04	125.97	296.22	213.94	124.41	3	3	+	+	+	+	+	+	FBgn0012024
chr3R	8090455	8090655	201	*	5.16506	4.42423	5.65215	-0.372028	0.00220128	0.318599	20.4	21.78	22.23	64.07	48.6	38.2	0	2	-	-	-	-	+	+	FBgn0265418
chrX	22872177	22872377	201	*	4.78825	5.29119	4.00957	0.372138	0.00221823	0.318599	45.51	43.56	28.41	14.86	16	17.46	3	2	+	+	+	-	+	+	CG42346
chr2L	6019853	6020053	201	*	6.80969	6.2066	7.23371	-0.350765	0.00222436	0.318599	89.45	64.19	67.93	193.15	148.16	110.22	3	3	+	+	+	+	+	+	H2.0
chr2R	14185129	14185329	201	*	6.48613	5.14495	7.16898	-0.299417	0.00223223	0.318599	26.68	26.36	53.11	310.15	81.19	40.38	2	2	+	-	+	+	+	-	CG30069
chr3R	22851316	22851516	201	*	4.8882	5.46979	3.89828	0.355715	0.00224776	0.319258	56.49	49.29	27.17	6.5	14.22	24.01	1	2	-	-	+	+	+	-	FBgn0264428
chr3L	14122119	14122319	201	*	5.1311	4.34717	5.63619	-0.368403	0.00226232	0.319774	20.4	17.19	23.47	65	50.37	33.83	1	1	-	-	+	-	+	-	Sox21b
chrX	5075888	5076088	201	*	5.67541	4.89904	6.17741	-0.365631	0.00228953	0.322064	23.54	25.22	40.76	98.43	58.67	60.02	1	2	-	-	+	+	+	-	CG32767
chr2L	1972769	1972969	201	*	8.25634	7.72219	8.64528	-0.323443	0.0023093	0.32329	260.49	159.33	213.66	525.58	317.65	357.95	3	3	+	+	+	+	+	+	erm
chr2L	19398930	19399130	201	*	7.36014	6.09897	8.02262	-0.302495	0.00237532	0.33095	50.22	34.39	121.03	513.51	190.23	76.39	2	3	+	-	+	+	+	+	CG17544
chrX	10473751	10473951	201	*	5.23554	4.5486	5.69898	-0.351852	0.00239899	0.332382	29.82	20.63	19.76	44.57	54.52	56.75	0	2	-	-	-	+	-	+	CG2889
chrX	11955547	11955747	201	*	4.91679	5.4835	3.97022	0.347067	0.00241551	0.332382	69.05	35.53	29.64	9.29	14.82	22.92	3	3	+	+	+	+	+	+	cac
chr3R	4852497	4852697	201	*	8.7679	8.30498	9.11781	-0.286354	0.00243931	0.332382	371.91	285.41	291.46	712.23	455.73	498.73	3	3	+	+	+	+	+	+	opa
chrX	6069544	6069744	201	*	5.55805	6.11	4.65278	0.348894	0.00244851	0.332382	102	60.75	44.46	13	30.82	31.65	3	2	+	+	+	-	+	+	Tsp5D
chr3L	13716591	13716791	201	*	5.12054	5.61377	4.3652	0.351212	0.00245751	0.332382	47.08	66.48	33.35	18.57	22.52	20.74	3	3	+	+	+	+	+	+	bru3
chrX	13237685	13237885	201	*	6.48534	7.03463	5.58735	0.347893	0.00246278	0.332382	199.29	77.94	116.09	24.14	55.71	64.39	3	3	+	+	+	+	+	+	mew
chrX	2790267	2790467	201	*	8.90034	8.41111	9.26502	-0.296161	0.00246512	0.332382	409.57	267.07	344.57	790.23	512.03	543.48	2	3	+	-	+	+	+	+	kirre
chr3R	31080800	31081000	201	*	6.1607	5.37282	6.66741	-0.349195	0.00249322	0.334166	34.52	36.68	53.11	153.22	82.97	68.75	2	2	+	-	+	-	+	+	Sox100B
chr2R	6872073	6872273	201	*	8.0557	7.35987	8.52313	-0.343863	0.00250119	0.334166	178.89	124.94	188.96	585.01	292.76	225.9	2	0	-	+	+	-	-	-	FBgn0265058
chr2L	7828264	7828464	201	*	8.6766	8.05843	9.10797	-0.329075	0.00254795	0.33817	327.97	191.42	280.35	814.37	428.47	412.52	1	1	-	-	+	-	+	-	mts
chrX	5593942	5594142	201	*	7.98247	7.36866	8.41172	-0.32776	0.00255428	0.33817	186.74	91.7	217.36	388.15	282.09	351.41	3	3	+	+	+	+	+	+	Vsx1
chr2R	23626337	23626537	201	*	4.95476	4.17421	5.45848	-0.339997	0.00261115	0.344019	14.12	25.22	14.82	50.14	40.3	41.47	2	3	+	-	+	+	+	+
chr3R	4833736	4833936	201	*	6.2047	5.60761	6.62577	-0.319891	0.00262528	0.344019	56.49	36.68	53.11	91	90.67	114.59	2	0	-	+	+	-	-	-	CG14659
chr2R	10196500	10196700	201	*	5.21912	4.47897	5.70591	-0.337386	0.00263373	0.344019	18.83	17.19	30.88	61.29	52.74	42.56	1	2	-	-	+	+	+	-
chr2R	14954458	14954658	201	*	5.7606	4.9711	6.26797	-0.33673	0.00266004	0.345912	23.54	29.8	40.76	110.5	56.3	64.39	1	1	+	-	-	-	+	-	aPKC
chr3R	14050696	14050896	201	*	5.61925	4.47734	6.24857	-0.294239	0.00276961	0.358566	25.11	19.49	22.23	152.29	40.89	34.92	3	3	+	+	+	+	+	+
chr3R	24699370	24699570	201	*	6.31357	6.76071	5.66216	0.314961	0.00282898	0.364639	139.66	90.55	95.1	36.21	62.23	53.47	3	3	+	+	+	+	+	+	slo
chrX	8510800	8511000	201	*	6.59923	7.02869	5.98497	0.30643	0.00288	0.369588	178.89	90.55	122.27	66.86	59.86	63.3	3	3	+	+	+	+	+	+	CG33181
chr3R	10665089	10665289	201	*	7.07766	6.19099	7.62278	-0.316561	0.00290654	0.371365	53.35	43.56	122.27	286	196.16	109.13	3	3	+	+	+	+	+	+
chr3L	27390610	27390810	201	*	6.4885	6.98347	5.72902	0.317879	0.0029376	0.373701	153.79	161.62	64.22	65	51.56	42.56	3	3	+	+	+	+	+	+	Dbp80
chr3L	27105783	27105983	201	*	5.45349	5.93962	4.71489	0.312266	0.00301182	0.380804	76.89	66.48	40.76	19.5	32	27.28	2	2	+	+	-	-	+	+
chr3L	5511289	5511489	201	*	5.77939	6.29408	4.97176	0.312748	0.00302636	0.380804	119.26	63.04	53.11	22.29	39.11	32.74	2	3	+	-	+	+	+	+	CG34342
chr3R	31038985	31039185	201	*	5.02769	3.89364	5.6547	-0.280873	0.00303248	0.380804	10.98	12.61	21	94.72	30.22	26.19	0	3	-	-	-	+	+	+	CanA1
chrX	17193142	17193342	201	*	4.94697	4.18129	5.44453	-0.310542	0.00306376	0.382332	21.97	11.46	21	52.93	37.34	40.38	3	3	+	+	+	+	+	+	baz
chr3L	5266887	5267087	201	*	4.40364	3.47231	4.96497	-0.303496	0.00307078	0.382332	10.98	14.9	7.41	35.29	27.85	30.56	3	3	+	+	+	+	+	+	shep
chr2R	23614689	23614889	201	*	6.58533	5.12176	7.29675	-0.225084	0.00311813	0.386582	20.4	30.95	53.11	372.36	62.23	37.1	1	1	-	-	+	-	+	-	Eglp2
chrX	6812100	6812300	201	*	4.7387	3.8191	5.29583	-0.296981	0.00313604	0.387162	21.97	8.02	12.35	46.43	47.41	24.01	1	2	-	-	+	+	+	-	pod1
chr2R	10424271	10424471	201	*	6.54367	5.80692	7.02901	-0.302673	0.00318391	0.39142	36.09	51.58	80.28	177.36	123.86	90.58	1	2	-	-	+	+	+	-	CG11825
chr3L	47894	48094	201	*	5.63379	6.12376	4.88615	0.29987	0.0032509	0.397782	59.63	93.99	55.58	21.36	23.71	43.65	1	2	-	-	+	+	+	-
chr3L	1549738	1549938	201	*	5.91618	5.31703	6.33826	-0.282953	0.00326373	0.397782	37.66	42.41	39.52	97.5	69.93	75.3	1	3	-	+	-	+	+	+	Pcyt1
chr3L	12277561	12277761	201	*	6.79379	6.32425	7.14745	-0.247478	0.0032858	0.397782	86.31	67.63	86.45	147.65	136.9	140.78	3	3	+	+	+	+	+	+	Sms
chr3R	14558066	14558266	201	*	5.79322	4.18004	6.53576	-0.19704	0.00329004	0.397782	10.98	13.75	29.64	222.86	39.11	16.37	1	2	-	-	+	+	+	-	Pde6
chr3R	14739212	14739412	201	*	7.69884	6.84575	8.23131	-0.294689	0.00331522	0.399177	81.6	74.51	188.96	489.37	229.94	182.25	3	3	+	+	+	+	+	+	eff
chrX	14700801	14701001	201	*	4.5595	5.12494	3.61654	0.281944	0.00337942	0.403086	45.51	33.24	25.94	8.36	7.7	20.74	0	2	-	-	-	+	+	-	NetB
chr2R	9409408	9409608	201	*	6.38598	4.91044	7.10003	-0.211575	0.00338723	0.403086	23.54	16.05	50.64	322.22	53.34	36.01	3	3	+	+	+	+	+	+	wun
chr2L	7711370	7711570	201	*	5.72721	4.16199	6.4602	-0.199428	0.00338901	0.403086	15.69	19.49	18.53	216.36	31.41	16.37	1	1	-	+	-	-	+	-	FBgn0012018
chr2R	13716447	13716647	201	*	5.34105	5.86979	4.49765	0.287946	0.00345356	0.4091	81.6	64.19	29.64	15.79	22.52	29.47	1	1	-	+	-	-	+	-	CG17716
chr2L	14580985	14581185	201	*	6.33205	5.56985	6.82816	-0.288228	0.00347701	0.40993	40.8	26.36	75.34	134.65	116.75	89.49	2	2	+	-	+	+	+	-
chr2L	22215198	22215398	201	*	5.20574	5.69387	4.46244	0.286131	0.00350253	0.40993	62.77	33.24	59.28	17.64	26.67	21.83	1	3	-	-	+	+	+	+	Ir40a
chr2L	20238600	20238800	201	*	5.55569	6.01767	4.87201	0.28155	0.00351609	0.40993	84.74	51.58	58.05	33.43	32.59	21.83	1	2	-	-	+	+	+	-
chr3L	11365274	11365474	201	*	5.77775	4.35731	6.47943	-0.214336	0.00351661	0.40993	14.12	10.32	37.05	181.07	66.97	19.64	1	2	-	-	+	+	+	-	CG6163
chr3L	3791117	3791317	201	*	6.65991	7.0908	6.04272	0.274278	0.00353775	0.410413	158.49	162.77	87.69	54.79	62.23	80.76	3	3	+	+	+	+	+	+	CG32264
chr2L	12974155	12974355	201	*	6.18023	4.65704	6.90451	-0.199328	0.0035488	0.410413	14.12	18.34	43.23	263.72	78.23	17.46	3	3	+	+	+	+	+	+	Vha68-2
chr3L	263947	264147	201	*	6.80098	6.22295	7.21253	-0.265565	0.00356672	0.410861	76.89	76.8	70.4	204.29	117.34	123.32	2	3	+	+	-	+	+	+	Tudor-SN
chr2R	9075940	9076140	201	*	5.15431	5.6631	4.3613	0.280931	0.0036305	0.415667	78.46	38.97	34.58	24.14	18.96	18.55	2	2	+	-	+	+	+	-	ana
chr2R	11469516	11469716	201	*	6.73537	5.82034	7.29086	-0.274536	0.00363686	0.415667	45.51	41.26	82.75	263.72	135.12	70.94	0	2	-	-	-	+	+	-
chr3R	11211314	11211514	201	*	6.50544	5.75518	6.99653	-0.279325	0.00366109	0.41614	51.79	43.56	66.69	200.57	99.56	82.94	0	2	-	-	-	+	+	-	SdhC
chr2R	6298768	6298968	201	*	6.29145	6.73568	5.64626	0.27184	0.00367051	0.41614	119.26	122.65	77.81	33.43	55.71	61.11	0	2	-	-	-	+	+	-
chrX	21424784	21424984	201	*	5.25669	5.73418	4.53807	0.277433	0.00368366	0.41614	70.62	45.85	43.23	16.71	21.33	31.65	1	1	-	+	-	-	-	+	DIP-beta
chr2L	9211537	9211737	201	*	5.13803	4.1724	5.71136	-0.268305	0.00369823	0.416179	12.55	21.78	19.76	90.07	34.37	32.74	3	3	+	+	+	+	+	+	tai
chr3L	14089910	14090110	201	*	5.69171	6.13254	5.05372	0.267034	0.00372925	0.418061	80.03	53.87	76.57	28.79	40.3	30.56	3	2	+	+	+	-	+	+
chrX	1218583	1218783	201	*	5.01826	4.32704	5.48363	-0.267571	0.00385697	0.428891	17.26	19.49	23.47	48.29	37.93	48.02	1	2	-	-	+	+	+	-	CG3638
chr2R	24389513	24389713	201	*	7.2198	6.15326	7.82628	-0.248638	0.00386505	0.428891	69.05	48.14	96.33	462.44	139.86	78.58	3	3	+	+	+	+	+	+	mAChR-A
chr3R	11327808	11328008	201	*	4.69202	5.22465	3.83852	0.267558	0.00388244	0.428891	53.35	37.83	21	15.79	11.85	15.28	0	2	-	-	-	+	+	-	pros
chrX	713555	713755	201	*	4.25996	2.90349	4.94654	-0.207055	0.00388996	0.428891	10.98	11.46	0	36.21	35.56	20.74	0	2	-	-	-	-	+	+	sdk
chr3L	3472251	3472451	201	*	5.88363	6.33473	5.2237	0.263028	0.00389914	0.428891	109.85	61.9	70.4	30.64	43.26	38.2	2	2	+	-	+	-	+	+	CG14971
chr2L	22018957	22019157	201	*	8.19846	7.55925	8.63988	-0.260176	0.00394266	0.43181	178.89	138.69	248.24	574.8	390.54	231.36	3	2	+	+	+	-	+	+	tio
chr3L	5187251	5187451	201	*	6.18377	5.63974	6.57789	-0.24473	0.0039552	0.43181	61.2	38.97	49.4	100.29	92.45	93.85	0	3	-	-	-	+	+	+	shep
chr3L	12610432	12610824	393	*	6.59819	6.0906	6.97293	-0.230809	0.00400505	0.43493	59.63	75.65	69.16	143	107.27	126.59	2	0	+	+	-	-	-	-	caup
chr2L	13746132	13746332	201	*	5.32354	4.69501	5.75989	-0.255433	0.00401351	0.43493	21.97	29.8	25.94	59.43	55.11	48.02	3	3	+	+	+	+	+	+	TM9SF4
chr3R	10492741	10492941	201	*	5.47256	5.90347	4.85532	0.253178	0.00404839	0.436444	67.48	51.58	60.52	22.29	29.63	34.92	3	3	+	+	+	+	+	+	FBgn0267136
chr3L	14002307	14002507	201	*	6.55078	5.93273	6.98209	-0.253228	0.00405731	0.436444	54.92	49.29	79.04	156.93	133.93	88.4	2	2	+	-	+	-	+	+	Nprl3
chrX	20681613	20681813	201	*	4.95568	5.48549	4.10951	0.260103	0.00409348	0.437462	61.2	27.51	45.7	10.21	21.93	19.64	3	2	+	+	+	-	+	+
chr3R	21499567	21499767	201	*	7.96032	7.41745	8.35384	-0.237676	0.00410819	0.437462	160.06	132.96	219.83	445.72	288.02	247.73	3	3	+	+	+	+	+	+	C15
chr2R	9691920	9692120	201	*	5.8618	5.17111	6.32693	-0.258308	0.00412136	0.437462	48.65	29.8	29.64	109.57	65.78	65.48	1	1	-	+	-	-	+	-	Uba1
chrX	18018840	18019040	201	*	5.47283	4.10592	6.16193	-0.199995	0.0041363	0.437462	17.26	18.34	16.06	166.22	27.85	20.74	1	3	-	-	+	+	+	+	Sh
chr3L	20247878	20248078	201	*	6.12684	4.91652	6.77561	-0.220748	0.00414153	0.437462	20.4	34.39	35.82	237.72	46.23	44.74	3	3	+	+	+	+	+	+	rdgC
chr2R	1532683	1532883	201	*	5.17428	4.50967	5.62755	-0.255909	0.00415872	0.437698	31.38	17.19	19.76	54.79	50.97	42.56	3	3	+	+	+	+	+	+
chr2R	18607055	18607255	201	*	5.55159	4.80802	6.03983	-0.257082	0.00419957	0.438625	31.38	21.78	30.88	95.64	58.08	43.65	3	3	+	+	+	+	+	+	GEFmeso
chr2R	5379012	5379212	201	*	6.30628	6.85425	5.41188	0.251852	0.00421221	0.438625	199.29	84.82	62.99	30.64	33.78	63.3	2	3	+	+	-	+	+	+
chrX	16956561	16956761	201	*	5.17903	4.40236	5.68114	-0.256721	0.00421251	0.438625	20.4	18.34	24.7	75.22	36.15	42.56	1	2	-	-	+	+	+	-	Ubr1
chr2R	14621922	14622122	201	*	6.07213	5.35553	6.54873	-0.253979	0.00426519	0.442205	40.8	25.22	56.81	117	98.38	65.48	3	3	+	+	+	+	+	+	CG12863
chrX	13175163	13175363	201	*	4.98088	5.44976	4.28181	0.252803	0.00427711	0.442205	32.95	40.12	58.05	15.79	20.74	21.83	3	3	+	+	+	+	+	+	CG32640
chrX	4425058	4425258	201	*	7.79588	7.06494	8.27872	-0.253079	0.00430002	0.443008	150.65	59.6	191.43	423.44	271.42	236.82	3	3	+	+	+	+	+	+	bi
chr2L	16881040	16881240	201	*	6.619	5.19273	7.32202	-0.185966	0.0043631	0.445268	29.82	36.68	43.23	388.15	64.6	27.28	2	3	+	-	+	+	+	+	CG31743
chr3R	173217	173417	201	*	5.56143	6.00213	4.92374	0.244722	0.00436533	0.445268	65.91	74.51	51.87	21.36	32.59	37.1	3	3	+	+	+	+	+	+
chr3L	4413885	4414085	201	*	6.44874	5.11345	7.13013	-0.197041	0.00436761	0.445268	26.68	24.07	53.11	317.58	69.93	32.74	3	3	+	+	+	+	+	+	DOR
chr3L	23183920	23184120	201	*	5.22619	5.71687	4.47689	0.250175	0.00438444	0.445432	59.63	56.17	41.99	12.07	29.63	25.1	3	2	+	+	+	-	+	+	CG34031
chr3L	23696608	23696808	201	*	6.07183	6.47914	5.5022	0.231656	0.00442865	0.448367	109.85	67.63	90.16	45.5	46.82	43.65	0	2	-	-	-	-	+	+
chr2L	21866509	21866709	201	*	6.79823	6.16579	7.23643	-0.239946	0.00450701	0.454727	91.02	36.68	87.69	153.22	146.38	152.78	3	3	+	+	+	+	+	+	FBgn0266222
chrX	7048495	7048695	201	*	4.95361	5.4191	4.26212	0.244194	0.00452298	0.45477	42.37	37.83	48.17	13	18.37	26.19	1	1	-	-	+	-	+	-	nullo
chr3R	22124168	22124368	201	*	5.55943	4.66572	6.10715	-0.240055	0.0045484	0.455759	20.4	13.75	41.99	94.72	71.71	40.38	2	3	-	+	+	+	+	+	CG42390
chr2R	22179596	22179796	201	*	5.83617	4.81106	6.42941	-0.226646	0.00460414	0.45977	31.38	19.49	33.35	165.29	40.89	52.38	3	3	+	+	+	+	+	+	CG11170
chr2L	21912512	21912712	201	*	6.28841	6.77761	5.5426	0.241352	0.00465127	0.462896	142.8	113.48	72.87	25.07	50.37	64.39	3	3	+	+	+	+	+	+
chr3R	16157921	16158121	201	*	6.22083	4.73907	6.93624	-0.17202	0.00466883	0.463069	12.55	20.63	46.93	274.86	72.89	19.64	3	2	+	+	+	-	+	+	CG6006
chr3L	15826063	15826263	201	*	6.30087	5.75141	6.69783	-0.218252	0.00478925	0.473407	50.22	44.7	66.69	122.57	97.19	91.67	1	1	-	-	+	-	+	-	DCP2
chrX	123936	124136	201	*	5.39769	5.93562	4.53024	0.233271	0.00480951	0.47381	76.89	25.22	81.51	29.71	17.78	21.83	3	3	+	+	+	+	+	+
chr2R	5142417	5142617	201	*	6.1972	5.6381	6.59913	-0.219162	0.00482813	0.474047	45.51	45.85	58.05	116.07	98.38	76.39	0	2	-	-	-	-	+	+	Atf6
chr3R	11328479	11328679	201	*	4.56307	5.14129	3.58311	0.223611	0.00490811	0.478606	48.65	42.41	14.82	13	14.22	8.73	2	2	-	+	+	+	+	-	pros
chr3L	13939061	13939261	201	*	6.5686	5.45157	7.19056	-0.207921	0.00491784	0.478606	26.68	36.68	67.93	299.01	83.56	55.66	1	2	-	-	+	+	+	-	CG32137
chr2L	17620059	17620259	201	*	4.95196	5.46713	4.14313	0.23292	0.00492362	0.478606	62.77	37.83	32.11	13.93	24.89	14.19	3	2	+	+	+	-	+	+
chr2R	17813976	17814176	201	*	6.86387	6.24056	7.2977	-0.224072	0.00499019	0.478637	69.05	51.58	106.21	202.43	151.71	117.86	3	3	+	+	+	+	+	+	grh
chr3L	23180593	23180793	201	*	5.44748	5.87585	4.83547	0.221649	0.00499058	0.478637	64.34	55.02	56.81	35.29	29.63	20.74	1	2	+	-	-	-	+	+	CG34031
chr3R	17997874	17998074	201	*	4.98071	5.46565	4.24487	0.229863	0.00500916	0.478637	59.63	30.95	41.99	21.36	21.33	14.19	3	2	+	+	+	-	+	+	cpo
chr3L	18781860	18782060	201	*	5.7174	4.53918	6.3572	-0.198243	0.00501102	0.478637	23.54	25.22	21	177.36	39.11	29.47	1	3	-	-	+	+	+	+	ftz-f1
chr2R	21178950	21179150	201	*	6.75975	5.43648	7.43816	-0.181662	0.00501525	0.478637	29.82	47	53.11	415.08	60.45	44.74	3	3	+	+	+	+	+	+	Pu
chr2R	17792643	17792843	201	*	6.81172	5.44901	7.49981	-0.17692	0.0050221	0.478637	31.38	36.68	62.99	438.29	61.04	43.65	1	1	-	-	+	+	-	-	Dhit
chr3R	17505685	17505885	201	*	5.539	4.00184	6.26622	-0.158206	0.00506043	0.480725	7.85	22.92	17.29	189.43	20.74	20.74	3	3	+	+	+	+	+	+	Dscam3
chr2L	11247890	11248090	201	*	5.82162	4.94268	6.36386	-0.224081	0.00510112	0.483021	29.82	22.92	39.52	142.07	58.08	46.93	2	2	+	-	+	+	+	-	ab
chr2R	13958094	13958294	201	*	6.60028	5.73672	7.13673	-0.224395	0.00512291	0.483434	47.08	41.26	71.63	251.65	93.04	77.48	1	2	-	-	+	+	+	-	Cp1
chr3R	14569527	14569727	201	*	6.69904	6.19645	7.07106	-0.198386	0.00513852	0.483434	56.49	73.36	90.16	149.5	132.75	121.14	3	3	+	+	+	+	+	+	Cys
chr3R	28858272	28858472	201	*	7.24313	6.76532	7.60145	-0.19201	0.00520941	0.486497	119.26	84.82	122.27	152.29	210.98	219.36	3	2	+	+	+	-	+	+	spg
chr3L	19139129	19139329	201	*	5.31017	4.36098	5.87779	-0.217279	0.00521638	0.486497	7.85	22.92	30.88	92.86	42.08	41.47	2	2	+	-	+	-	+	+	CG14082
chr2R	22242134	22242334	201	*	7.62488	7.1749	7.96737	-0.183073	0.00523885	0.486497	158.49	116.92	158.08	311.08	212.75	226.99	1	2	-	-	+	+	+	-	dve
chr2R	14504105	14504305	201	*	6.40896	5.72262	6.87213	-0.222213	0.00524939	0.486497	59.63	32.09	66.69	162.5	104.9	84.03	2	3	+	-	+	+	+	+	Cpsf160
chrX	22575177	22575377	201	*	6.69863	7.18748	5.95366	0.223237	0.00526598	0.486497	225.97	93.99	117.33	37.14	73.49	75.3	3	3	+	+	+	+	+	+
chr2L	17437004	17437204	201	*	4.73277	5.20371	4.02906	0.222663	0.00527295	0.486497	40.8	40.12	29.64	18.57	11.85	18.55	3	3	+	+	+	+	+	+	CG33928
chr4	905260	905460	201	*	5.29383	4.63936	5.74241	-0.218139	0.00529917	0.486497	17.26	22.92	34.58	50.14	58.08	52.38	3	3	+	+	+	+	+	+	unc-13
chr2L	20831187	20831387	201	*	5.52145	4.01308	6.2426	-0.156026	0.00531434	0.486497	6.28	13.75	28.41	178.29	31.41	17.46	3	3	+	+	+	+	+	+	CG31674
chrX	8574643	8574843	201	*	5.42213	4.38474	6.01934	-0.204921	0.00532072	0.486497	18.83	8.02	35.82	101.22	62.82	30.56	3	3	+	+	+	+	+	+	spirit
chr2L	13640533	13640733	201	*	4.93052	4.07392	5.46433	-0.217528	0.00536892	0.487928	23.54	18.34	8.65	65.93	33.78	32.74	2	3	+	-	+	+	+	+	ics
chr2R	4324832	4325032	201	*	5.31205	5.76008	4.65875	0.215313	0.00536973	0.487928	64.34	55.02	43.23	21.36	32.59	21.83	0	3	-	-	-	+	+	+	Gprk1
chr2L	9908577	9908777	201	*	6.35758	4.91219	7.06493	-0.160205	0.00540335	0.489463	14.12	20.63	55.58	311.08	62.23	28.37	2	2	+	+	-	-	+	+	CG13124
chr2R	21966935	21967135	201	*	5.07721	5.56631	4.33165	0.218293	0.00545401	0.491614	62.77	27.51	51.87	25.07	18.96	16.37	2	3	+	+	-	+	+	+	ppk9
chr3R	27706988	27707188	201	*	5.62939	5.07306	6.0299	-0.203844	0.00546069	0.491614	37.66	27.51	35.82	64.07	67.56	64.39	1	3	-	-	+	+	+	+	CROT
chr3L	19682988	19683188	201	*	7.49263	6.57559	8.04885	-0.210645	0.00552253	0.495655	37.66	60.75	187.72	359.36	257.2	177.89	3	3	+	+	+	+	+	+	FBgn0265889
chr3R	18244671	18244871	201	*	6.88766	5.83772	7.4889	-0.198495	0.00556185	0.497658	28.25	47	96.33	328.72	145.79	64.39	0	2	-	-	-	+	+	-	14-3-3epsilon
chr3L	13775085	13775285	201	*	5.26796	5.70315	4.64181	0.207093	0.00563482	0.50265	59.63	43.56	53.11	18.57	29.04	27.28	1	1	-	-	+	-	+	-	bru3
chr3L	2262554	2262754	201	*	6.14062	5.62852	6.51781	-0.189345	0.00565751	0.50314	47.08	47	54.34	99.36	80.6	94.94	1	1	-	-	+	-	+	-	oxt
chr3L	14131334	14131534	201	*	5.33751	4.63593	5.8075	-0.210242	0.00574053	0.508976	17.26	25.22	32.11	72.43	56.3	39.29	1	1	-	-	+	-	+	-	Sox21b
chr3L	3054963	3055163	201	*	6.10791	5.50925	6.52975	-0.201838	0.00576721	0.509797	36.09	41.26	59.28	111.43	94.82	70.94	1	2	-	-	+	+	+	-	CG16753
chrX	13342040	13342240	201	*	4.43998	3.50939	5.00105	-0.201766	0.00580408	0.510274	12.55	8.02	13.59	43.64	34.97	17.46	1	1	-	+	-	+	-	-
chrX	10386868	10387068	201	*	5.23352	4.35167	5.77684	-0.205112	0.00582672	0.510274	26.68	16.05	18.53	93.79	31.41	39.29	2	3	+	-	+	+	+	+	flw
chr2R	22896081	22896281	201	*	6.21324	5.65435	6.61507	-0.195738	0.00583239	0.510274	51.79	41.26	58.05	117.93	101.93	74.21	3	2	+	+	+	-	+	+	nahoda
chr2R	14025212	14025412	201	*	5.28993	4.35265	5.85337	-0.201757	0.00584237	0.510274	15.69	17.19	28.41	101.22	43.85	28.37	0	2	-	-	-	+	-	+	mam
chrX	3396338	3396538	201	*	4.83675	5.34433	4.04672	0.206933	0.00591797	0.515339	61.2	29.8	30.88	21.36	11.85	16.37	3	3	+	+	+	+	+	+	CG12535
chr3L	9377319	9377519	201	*	5.82623	4.74886	6.43608	-0.186879	0.00595729	0.516518	18.83	14.9	46.93	140.22	90.08	29.47	1	1	+	-	-	-	+	-	Hsp26
chr2R	23621474	23621674	201	*	7.4742	6.67265	7.98645	-0.205601	0.00596682	0.516518	98.86	67.63	139.56	431.79	213.35	115.68	2	2	-	+	+	+	+	-
chr2R	10617489	10617689	201	*	6.52642	5.10117	7.22921	-0.15012	0.00607001	0.523901	26.68	19.49	56.81	363.08	58.67	28.37	2	3	+	-	+	+	+	+	CG11883
chr2L	3662459	3662659	201	*	7.12976	6.45814	7.58626	-0.200806	0.00612623	0.527199	102	48.14	113.62	268.36	177.2	130.96	2	2	+	-	+	+	+	-	Drgx
chr2L	6100191	6100391	201	*	5.61094	4.6746	6.17404	-0.194537	0.00615874	0.527251	25.11	20.63	30.88	129.07	58.08	29.47	1	3	+	-	-	+	+	+	CG9175
chrX	20445019	20445219	201	*	5.35337	5.87071	4.53908	0.20117	0.00617363	0.527251	65.91	35.53	74.1	31.57	27.26	10.91	2	1	-	+	+	-	-	+	CG1695
chrX	10602310	10602510	201	*	7.17003	6.32016	7.70127	-0.199196	0.00618091	0.527251	84.74	56.17	98.8	360.29	185.49	78.58	1	2	-	-	+	+	+	-	CG1628
chr2L	14051595	14051795	201	*	6.15257	6.61956	5.45772	0.199915	0.00620588	0.527842	138.09	79.09	77.81	26	48	57.84	1	3	-	-	+	+	+	+	nAChRalpha5
chr3L	2913645	2913845	201	*	5.66881	4.25738	6.36841	-0.149601	0.00622854	0.528235	10.98	22.92	23.47	199.65	23.11	25.1	0	2	-	-	-	+	+	-	Shab
chrX	11881856	11882056	201	*	5.24172	4.26661	5.81829	-0.188266	0.00634723	0.536745	17.26	19.49	21	107.72	33.19	28.37	1	1	-	+	-	-	+	-	CG10353
chr3L	20730342	20730542	201	*	6.06685	4.51632	6.79683	-0.1331	0.00647021	0.543621	12.55	9.17	46.93	250.72	67.56	15.28	3	3	+	+	+	+	+	+	CG13252
chr2R	24955977	24956177	201	*	5.38641	4.02963	6.07307	-0.150696	0.0064895	0.543621	10.98	19.49	18.53	159.72	23.71	18.55	3	3	+	+	+	+	+	+	FBgn0266088
chr2R	6419787	6419987	201	*	4.56637	5.09626	3.72	0.19321	0.00649674	0.543621	40.8	30.95	30.88	5.57	15.41	18.55	3	3	+	+	+	+	+	+
chr3R	11458089	11458289	201	*	5.544	4.11203	6.24832	-0.143776	0.00650287	0.543621	6.28	17.19	28.41	178.29	29.04	20.74	3	3	+	+	+	+	+	+	PGRP-LB
chrX	5093847	5094047	201	*	4.79109	4.10402	5.2546	-0.193071	0.00653148	0.544458	15.69	14.9	21	43.64	33.78	37.1	3	2	+	+	+	+	+	-	CG15465
chr2L	14409611	14409811	201	*	7.39228	6.18334	8.04067	-0.162892	0.00656149	0.545405	54.92	30.95	132.15	519.08	216.31	54.57	3	3	+	+	+	+	+	+	elB
chr2R	23759338	23759538	201	*	5.78029	6.18129	5.223	0.180547	0.00660386	0.547372	80.03	56.17	81.51	33.43	34.97	43.65	3	3	+	+	+	+	+	+	sona
chr2R	20996611	20996811	201	*	6.80177	6.26007	7.19468	-0.177902	0.00664156	0.548689	91.02	56.17	82.75	190.36	134.53	114.59	1	1	+	-	-	+	-	-	dgt3
chrX	22575510	22575710	201	*	4.79855	5.30711	4.00614	0.191653	0.00665726	0.548689	54.92	36.68	27.17	9.29	16	22.92	1	3	-	-	+	+	+	+
chr3L	11462728	11462928	201	*	5.3782	5.86609	4.63548	0.191576	0.00668509	0.549436	67.48	63.04	44.46	12.07	24.3	38.2	1	1	-	-	+	-	+	-
chrX	16484689	16484889	201	*	5.4482	5.92074	4.74086	0.189344	0.00678272	0.552172	86.31	43.56	51.87	19.5	22.52	38.2	2	1	+	-	+	+	-	-	para
chr3R	23955421	23955621	201	*	5.71095	4.92196	6.21811	-0.189332	0.0067865	0.552172	21.97	18.34	50.64	90.07	84.15	49.11	3	3	+	+	+	+	+	+	GluProRS
chr3R	7868204	7868404	201	*	5.38819	4.37212	5.97847	-0.176935	0.00679077	0.552172	12.55	13.75	35.82	110.5	49.19	29.47	2	2	+	+	-	-	+	+	CG17816
chr3R	31060798	31060998	201	*	7.65924	7.23025	7.98947	-0.150191	0.00679744	0.552172	149.08	127.23	174.14	316.65	219.87	225.9	0	2	-	-	-	-	+	+	dco
chr3L	5577292	5577492	201	*	5.00722	3.91119	5.62282	-0.170003	0.00681725	0.552172	9.42	17.19	18.53	94.72	36.74	16.37	1	1	-	-	+	+	-	-	Msr-110
chr3L	19635165	19635365	201	*	6.90252	5.97012	7.46423	-0.182079	0.00683162	0.552172	43.94	36.68	107.45	307.36	141.64	80.76	2	2	-	+	+	+	+	-	wnd
chr3L	25708389	25708589	201	*	5.08044	5.52029	4.44453	0.184908	0.00686199	0.552589	43.94	49.29	44.46	13.93	21.93	29.47	3	3	+	+	+	+	+	+	FBgn0266690
chr2L	3872401	3872601	201	*	6.95469	6.41922	7.34432	-0.172712	0.00687455	0.552589	91.02	60.75	104.98	209.86	143.42	134.23	1	2	-	-	+	+	+	-	CG31957
chr3R	7967800	7968000	201	*	5.5397	4.56673	6.11554	-0.177339	0.00693502	0.555923	21.97	19.49	29.64	129.07	52.74	26.19	3	3	+	+	+	+	+	+	dsx
chrX	16809192	16809392	201	*	5.14605	5.62213	4.43064	0.184919	0.00702215	0.559839	65.91	27.51	54.34	18.57	24.3	21.83	2	1	+	-	+	-	+	-	CG4829
chrX	16142216	16142416	201	*	4.7756	5.41154	3.61088	0.16009	0.00703031	0.559839	76.89	29.8	21	2.79	14.22	19.64	1	2	-	-	+	+	+	-	disco-r
chr3R	29370456	29370656	201	*	5.04494	5.53367	4.30026	0.18516	0.00704128	0.559839	70.62	26.36	41.99	19.5	17.78	21.83	3	3	+	+	+	+	+	+
chr2L	19142141	19142492	352	*	5.77337	4.90332	6.31228	-0.181087	0.00709509	0.5621	23.54	21.78	44.46	127.22	74.08	37.1	3	2	+	+	+	-	+	+	brat
chrX	9094033	9094233	201	*	4.96584	4.30364	5.418	-0.182041	0.00710814	0.5621	17.26	16.05	25.94	46.43	48	33.83	3	3	+	+	+	+	+	+	CG7766
chr3L	11586906	11587106	201	*	7.55159	7.10745	7.8907	-0.150152	0.00715446	0.564238	147.51	103.16	163.02	267.43	252.46	192.07	2	2	+	-	+	+	+	-	rt
chr2L	2729960	2730160	201	*	5.64001	4.09427	6.369	-0.124267	0.00725849	0.569549	7.85	13.75	29.64	203.36	32.59	12	3	3	+	+	+	+	+	+	CG31689
chr3R	6112657	6112857	201	*	6.03566	5.0789	6.60592	-0.17293	0.00729496	0.569549	25.11	35.53	40.76	190.36	52.74	49.11	3	2	+	+	+	+	+	-	Obp83g
chrX	12212718	12212918	201	*	6.07427	6.55079	5.3579	0.180561	0.00729679	0.569549	114.55	48.14	118.56	28.79	46.23	48.02	3	3	+	+	+	+	+	+	Ten-a
chr3L	6023261	6023461	201	*	6.02651	6.47648	5.36904	0.17787	0.00731086	0.569549	128.68	77.94	60.52	30.64	48.6	44.74	3	3	+	+	+	+	+	+	PVRAP
chr2R	21250946	21251146	201	*	8.04892	7.69781	8.33109	-0.119972	0.00731912	0.569549	224.4	197.15	201.31	379.79	292.76	293.57	3	3	+	+	+	+	+	+	ASPP
chr3R	26106784	26106984	201	*	5.50133	4.11392	6.19531	-0.135641	0.00734036	0.569686	15.69	10.32	25.94	173.65	32	14.19	1	1	-	-	+	+	-	-	CG31324
chr2L	15427988	15428188	201	*	5.44718	5.92171	4.73534	0.178772	0.00740287	0.569775	83.17	49.29	49.4	14.86	29.04	36.01	1	1	-	-	+	-	+	-	wor
chr3R	19627670	19627870	201	*	5.59047	6.03013	4.95497	0.174838	0.00741939	0.569775	76.89	40.12	79.04	34.36	31.41	27.28	1	1	-	+	-	-	+	-	CG6231
chr3R	20791174	20791374	201	*	4.97554	4.11124	5.51228	-0.1754	0.00743552	0.569775	23.54	17.19	11.12	76.14	30.22	30.56	3	3	+	+	+	+	+	+	Syp
chr2L	8104163	8104363	201	*	6.68777	5.89391	7.19691	-0.178187	0.00743599	0.569775	48.65	47	82.75	249.79	116.16	74.21	0	2	-	-	-	+	+	-	Bsg
chr3R	5592294	5592494	201	*	6.07661	5.18626	6.62309	-0.174562	0.00743888	0.569775	26.68	34.39	48.17	173.65	80.6	41.47	3	2	+	+	+	-	+	+	noi
chr3L	16985620	16985820	201	*	5.42288	4.49214	5.984	-0.171145	0.00746631	0.570383	26.68	14.9	25.94	109.57	56.3	24.01	3	3	+	+	+	+	+	+	Exn
chr3L	25868648	25868848	201	*	4.45733	4.99454	3.59179	0.174993	0.00749106	0.570783	50.22	19.49	25.94	13	10.07	13.1	1	2	-	+	-	+	+	-	l(3)80Fg
chr3L	11197871	11198071	201	*	6.72291	6.07779	7.16711	-0.174414	0.00752246	0.571688	64.34	48.14	90.16	206.15	133.34	91.67	3	1	+	+	+	-	+	-	GlcAT-P
chr3L	17907691	17907891	201	*	5.04924	3.8182	5.70366	-0.14478	0.00770106	0.582007	9.42	5.73	27.17	102.14	36.74	17.46	1	2	-	-	+	+	+	-	Prestin
chr3L	4188385	4188585	201	*	5.16347	4.06299	5.78043	-0.155804	0.00774693	0.582007	10.98	20.63	18.53	114.22	26.67	24.01	3	3	+	+	+	+	+	+	tipE
chr2L	22168589	22168789	201	*	6.95455	6.51093	7.29337	-0.143049	0.00774693	0.582007	105.14	73.36	95.1	179.22	158.23	133.14	2	3	+	-	+	+	+	+	Clamp
chr3R	18009150	18009350	201	*	4.83498	5.35615	4.011	0.171954	0.00778552	0.582007	58.06	40.12	24.7	8.36	16	24.01	1	2	-	-	+	+	+	-	cpo
chr3R	14876004	14876204	201	*	5.55896	4.50375	6.16187	-0.158467	0.00779149	0.582007	17.26	29.8	21	146.72	39.71	28.37	3	2	+	+	+	-	+	+	btsz
chr2R	8131810	8132010	201	*	6.52189	5.67229	7.05302	-0.169889	0.00786839	0.582007	48.65	40.12	64.22	247.93	80.6	69.84	1	1	+	-	-	+	-	-	Pabp2
chr2R	25215161	25215361	201	*	7.30695	6.35935	7.87401	-0.164358	0.00788794	0.582007	64.34	42.41	139.56	403.94	216.9	82.94	3	3	+	+	+	+	+	+	CG9380
chr3R	19730536	19730736	201	*	5.43161	4.32867	6.04932	-0.153089	0.00788881	0.582007	18.83	22.92	18.53	142.07	32.59	24.01	0	3	-	-	-	+	+	+	GluClalpha
chrX	12940359	12940559	201	*	6.47451	6.96175	5.73332	0.171428	0.00791581	0.582007	174.19	83.68	116.09	26	53.93	79.67	1	2	-	-	+	+	+	-	fne
chr2L	18576297	18576497	201	*	5.39624	4.09082	6.07016	-0.135475	0.00796509	0.582007	10.98	8.02	32.11	147.65	33.19	20.74	1	2	-	-	+	+	+	-	Pde11
chr2R	13038869	13039069	201	*	7.73261	7.22113	8.10945	-0.15334	0.00797393	0.582007	158.49	110.04	179.08	376.08	256.02	196.44	3	3	+	+	+	+	+	+
chr3L	7828179	7828379	201	*	5.02544	3.5117	5.74773	-0.11898	0.00799257	0.582007	7.85	10.32	16.06	129.07	26.67	5.46	2	2	+	+	-	-	+	+	Pdp1
chr3L	15142066	15142266	201	*	5.86007	5.35584	6.23299	-0.151914	0.00799826	0.582007	45.51	37.83	39.52	71.5	72.3	81.85	3	3	+	+	+	+	+	+	Pex3
chr2L	6339267	6339467	201	*	7.95184	7.53426	8.2753	-0.133147	0.00800083	0.582007	202.43	137.55	216.13	368.65	294.54	266.28	3	3	+	+	+	+	+	+	Cpr
chr2R	13362951	13363151	201	*	6.17358	4.88898	6.84217	-0.136551	0.00801353	0.582007	23.54	33.24	32.11	276.72	39.11	28.37	1	2	-	-	+	+	+	-	FBgn0266851
chr2L	595162	595362	201	*	5.85648	4.99477	6.39224	-0.167413	0.00801959	0.582007	18.83	28.66	48.17	132.79	78.82	40.38	3	3	+	+	+	+	+	+	Gsc
chr2L	6673299	6673499	201	*	6.91844	5.7922	7.54314	-0.149275	0.00802597	0.582007	39.23	34.39	92.63	386.29	127.42	45.84	2	3	+	-	+	+	+	+	cup
chr2R	19462388	19462588	201	*	6.085	4.79143	6.7559	-0.135773	0.00802821	0.582007	15.69	22.92	44.46	250.72	46.23	27.28	1	1	-	-	+	+	-	-	par-1
chr3L	10752902	10753102	201	*	5.6436	4.53339	6.2635	-0.150752	0.00803618	0.582007	17.26	27.51	24.7	160.65	48	21.83	3	3	+	+	+	+	+	+
chr3L	6218562	6218762	201	*	6.9968	6.45575	7.38937	-0.156681	0.00808625	0.584187	86.31	58.46	118.56	174.57	198.53	129.87	0	2	-	-	-	+	+	-	FBgn0002526
chr3L	8546503	8546703	201	*	7.2558	6.5429	7.73079	-0.168034	0.00813777	0.585465	72.19	63.04	144.5	334.29	160.01	142.96	3	3	+	+	+	+	+	+	rhea
chrX	4444928	4445128	201	*	4.1969	3.19623	4.78208	-0.157371	0.00815485	0.585465	9.42	5.73	12.35	38.07	17.19	27.28	1	2	-	-	+	+	+	-	bi
chr2L	1185979	1186179	201	*	6.57975	5.21781	7.26766	-0.128514	0.00816397	0.585465	31.38	32.09	48.17	384.44	52.74	25.1	0	3	-	-	-	+	+	+	CG5126
chrX	20110790	20110990	201	*	4.75273	5.214	4.07062	0.166138	0.00823184	0.586307	48.65	35.53	27.17	14.86	14.82	20.74	3	3	+	+	+	+	+	+	karr
chrX	4380967	4381167	201	*	5.33408	4.77281	5.73713	-0.156501	0.00824497	0.586307	23.54	26.36	32.11	57.57	53.34	49.11	1	2	-	+	-	-	+	+	CG12688
chr3L	18641274	18641474	201	*	5.81758	4.51528	6.4907	-0.132203	0.00825853	0.586307	23.54	24.07	21	216.36	33.78	19.64	3	3	+	+	+	+	+	+	MYPT-75D
chr3R	16886567	16886767	201	*	7.57342	7.15312	7.8985	-0.130493	0.00826401	0.586307	133.39	115.77	177.84	208	231.72	276.1	2	1	+	+	-	-	+	-	FBgn0264857
chr2R	6373260	6373460	201	*	5.18796	4.52344	5.64118	-0.165327	0.00827591	0.586307	28.25	16.05	24.7	33.43	62.82	53.47	3	3	+	+	+	+	+	+
chr3R	12375177	12375377	201	*	4.50608	5.05441	3.61072	0.161173	0.00832285	0.588208	50.22	30.95	18.53	7.43	10.67	18.55	3	3	+	+	+	+	+	+	GstD5
chr2L	1636547	1636747	201	*	5.6672	4.10861	6.39884	-0.111554	0.00844932	0.595707	9.42	11.46	30.88	207.07	37.34	8.73	3	2	+	+	+	-	+	+
chr3R	1688746	1688946	201	*	4.7508	5.28457	3.89431	0.161911	0.00847131	0.595749	47.08	22.92	46.93	6.5	19.56	18.55	1	2	+	-	-	-	+	+	Myo81F
chr3L	17633159	17633359	201	*	5.15628	4.07667	5.76684	-0.147394	0.00849062	0.595749	15.69	11.46	23.47	112.36	23.71	27.28	3	2	+	+	+	-	+	+	CG7497
chr2R	7663671	7663871	201	*	5.27534	4.06712	5.92353	-0.13669	0.0085491	0.597474	14.12	11.46	24.7	133.72	32	16.37	3	3	+	+	+	+	+	+	CG2065
chrX	14010566	14010766	201	*	5.05239	5.60371	4.14885	0.158433	0.00856956	0.597474	45.51	27.51	72.87	6.5	24.89	21.83	2	3	+	-	+	+	+	+
chr3L	2418552	2418752	201	*	4.36708	2.95524	5.06678	-0.122214	0.00857647	0.597474	1.57	6.88	14.82	65.93	23.71	10.91	1	1	-	+	-	-	+	-	Svil
chr2R	20313508	20313708	201	*	5.49186	4.64133	6.02334	-0.159784	0.00861911	0.599018	23.54	22.92	28.41	116.07	47.41	31.65	1	1	+	-	-	+	-	-	CG13868
chrX	15052068	15052268	201	*	4.58573	3.75469	5.10967	-0.159805	0.00864292	0.599246	14.12	10.32	16.06	48.29	36.74	18.55	3	3	+	+	+	+	+	+	hiw
chr2L	16521352	16521552	201	*	7.52425	6.96058	7.92853	-0.152409	0.00866336	0.599246	125.54	81.38	166.73	315.72	253.65	161.52	3	3	+	+	+	+	+	+	CG5953
chr2L	8735688	8735888	201	*	6.98985	5.83726	7.62229	-0.139312	0.00870287	0.600204	40.8	34.39	96.33	424.36	120.9	45.84	3	3	+	+	+	+	+	+	raw
chr2R	6354075	6354275	201	*	4.1114	3.09273	4.70254	-0.149046	0.00871824	0.600204	6.28	5.73	13.59	17.64	33.19	27.28	0	2	-	-	-	+	+	-
chrX	6231886	6232086	201	*	6.17225	5.62732	6.56685	-0.149584	0.00876659	0.602116	58.06	30.95	59.28	88.22	100.15	96.04	2	3	+	-	+	+	+	+	dtn
chr2R	24814597	24814797	201	*	8.62494	7.98038	9.06888	-0.157106	0.00881307	0.603892	199.29	142.13	416.2	736.37	489.51	385.24	3	3	+	+	+	+	+	+	Dll
chr2R	15380839	15381039	201	*	7.63062	7.16315	7.98312	-0.136034	0.00884046	0.604353	186.74	128.38	114.86	326.86	213.94	218.26	1	3	+	-	-	+	+	+	dup
chr2R	13539790	13539990	201	*	6.94591	6.04512	7.49622	-0.153685	0.00892724	0.608863	75.32	41.26	81.51	356.58	104.3	80.76	2	1	+	-	+	-	+	-	CG6145
chr2R	11289342	11289542	201	*	7.94054	7.42839	8.31775	-0.141975	0.00898672	0.611494	188.31	128.38	200.07	459.65	260.76	236.82	3	3	+	+	+	+	+	+	Fbl6
chr3L	3035382	3035582	201	*	6.65736	5.9879	7.11286	-0.155881	0.00902502	0.612675	62.77	42.41	85.22	191.29	147.56	76.39	1	1	-	-	+	+	-	-	CG2162
chr2R	2079721	2079921	201	*	7.09288	6.19457	7.64229	-0.151942	0.00908748	0.613736	81.6	50.43	87.69	368.65	170.68	60.02	3	3	+	+	+	+	+	+	CG17684
chr2R	11630042	11630242	201	*	6.13007	5.49105	6.5714	-0.153694	0.00910096	0.613736	47.08	29.8	58.05	130.93	88.89	65.48	1	1	-	-	+	+	-	-	CG9005
chrX	5899604	5899804	201	*	5.51899	4.97474	5.91324	-0.146149	0.00910357	0.613736	40.8	26.36	27.17	56.64	58.67	65.48	2	2	+	-	+	+	+	-	Act5C
chr3L	13476684	13476884	201	*	4.8476	3.94354	5.3991	-0.150741	0.00919629	0.618314	12.55	12.61	21	73.36	31.41	21.83	3	2	+	+	+	-	+	+	CG10089
chrX	20653690	20653890	201	*	4.86379	5.43768	3.89653	0.147519	0.00921374	0.618314	73.75	22.92	33.35	5.57	18.37	20.74	0	2	-	-	-	+	+	-
chrX	9666829	9667029	201	*	4.64654	5.10468	3.97131	0.153025	0.00926322	0.619443	42.37	27.51	33.35	13	16.59	17.46	3	3	+	+	+	+	+	+	nej
chrX	17171887	17172087	201	*	5.28362	5.78201	4.51592	0.154076	0.00928384	0.619443	78.46	29.8	56.81	13	27.26	28.37	2	2	+	-	+	+	+	-	baz
chr2R	18536579	18536779	201	*	7.29745	6.60239	7.76454	-0.153462	0.00929408	0.619443	67.48	89.41	134.62	356.58	172.45	123.32	3	3	+	+	+	+	+	+	Pepck1
chr3R	27223138	27223338	201	*	4.89983	3.92009	5.47798	-0.144583	0.0093456	0.620364	15.69	14.9	14.82	85.43	30.82	17.46	2	3	+	-	+	+	+	+
chr2R	24293932	24294132	201	*	6.45339	5.07533	7.14515	-0.116381	0.00935031	0.620364	17.26	17.19	66.69	301.79	104.3	18.55	1	2	-	-	+	+	+	-	Fatp3
chr2R	14035932	14036132	201	*	5.64465	4.55577	6.25806	-0.137089	0.00943199	0.624249	7.85	19.49	43.23	139.29	58.67	31.65	3	3	+	+	+	+	+	+	mam
chr3R	14609462	14609662	201	*	4.66193	3.63143	5.25692	-0.140158	0.00948831	0.624249	10.98	12.61	13.59	73.36	26.08	15.28	1	2	-	-	+	+	+	-	CG14853
chrX	20519551	20519751	201	*	5.11069	4.24618	5.64751	-0.14889	0.00951859	0.624249	18.83	18.34	19.76	91	33.19	26.19	0	2	-	-	-	+	+	-	Tak1
chr3L	12223335	12223535	201	*	5.20094	4.024	5.84037	-0.129273	0.00954031	0.624249	12.55	10.32	25.94	121.64	34.97	15.28	1	1	-	-	+	-	+	-	app
chr3L	13710024	13710224	201	*	5.10059	5.56387	4.41403	0.149995	0.00954618	0.624249	67.48	43.56	30.88	17.64	26.67	19.64	1	1	+	-	-	-	+	-	bru3
chr2R	8735627	8735827	201	*	5.3981	4.18833	6.04672	-0.126551	0.00959115	0.624249	14.12	18.34	22.23	148.57	35.56	14.19	1	2	-	-	+	+	+	-	CG8740
chr2R	10444164	10444364	201	*	6.14491	5.09292	6.7468	-0.137391	0.00959924	0.624249	31.38	24.07	46.93	227.5	58.67	36.01	1	1	-	-	+	-	+	-	Galphao
chr3L	3926370	3926570	201	*	5.26729	4.15538	5.88771	-0.133321	0.00962093	0.624249	14.12	18.34	21	126.29	34.97	16.37	0	2	-	-	-	+	+	-	Eip63F-1
chr3R	17920386	17920586	201	*	5.66063	4.55395	6.27947	-0.133532	0.0096661	0.624249	7.85	20.63	41.99	139.29	67.56	26.19	3	3	+	+	+	+	+	+	cpo
chr2L	8370420	8370620	201	*	5.97752	4.80663	6.61523	-0.128337	0.00967273	0.624249	23.54	17.19	43.23	205.22	68.15	20.74	3	3	+	+	+	+	+	+	CG17292
chr2R	5804459	5804659	201	*	5.71014	4.64264	6.31692	-0.135276	0.00971774	0.624249	25.11	26.36	23.47	173.65	34.97	30.56	3	3	+	+	+	+	+	+	dpr12
chr3R	6958696	6958896	201	*	5.30676	4.42071	5.85165	-0.145755	0.00974262	0.624249	18.83	19.49	25.94	107.72	34.97	30.56	3	3	+	+	+	+	+	+	Antp
chr2L	5461350	5461550	201	*	8.81159	8.37302	9.14745	-0.121789	0.00974441	0.624249	386.03	226.96	381.62	715.01	485.36	500.92	0	2	-	-	-	+	+	-	mid
chr2L	2908817	2909017	201	*	6.63476	5.98521	7.08104	-0.147304	0.0097523	0.624249	70.62	36.68	82.75	188.5	130.38	87.31	0	2	-	-	-	-	+	+	lilli
chr3R	22733096	22733296	201	*	6.67948	6.23028	7.02152	-0.123167	0.00980315	0.624249	70.62	60.75	93.86	122.57	128.6	138.6	1	3	-	-	+	+	+	+	Takl2
chr3L	13543914	13544114	201	*	5.41136	5.90416	4.65704	0.148437	0.00981352	0.624249	89.45	63.04	27.17	20.43	22.52	32.74	0	3	-	-	-	+	+	+	bru3
chr2R	18717384	18717584	201	*	5.88609	4.93863	6.45311	-0.14174	0.0098315	0.624249	21.97	20.63	49.4	160.65	64	38.2	2	0	+	+	-	-	-	-	Hs3st-A
chr2L	291754	291954	201	*	5.96038	5.02045	6.52475	-0.142024	0.00984316	0.624249	29.82	36.68	30.88	184.79	52.15	39.29	3	3	+	+	+	+	+	+	Amnionless
chr2L	4244498	4244698	201	*	5.26618	5.70698	4.62828	0.145984	0.00984317	0.624249	69.05	48.14	39.52	32.5	16.59	25.1	2	3	-	+	+	+	+	+
chr3L	17841219	17841419	201	*	6.32045	4.94993	7.01042	-0.112982	0.00984846	0.624249	20.4	22.92	49.4	321.29	41.48	24.01	1	1	-	-	+	+	-	-	CG5577
chr2L	8205362	8205562	201	*	5.99055	4.51889	6.70375	-0.106428	0.00985689	0.624249	9.42	14.9	44.46	259.08	29.63	24.01	3	3	+	+	+	+	+	+	SLC5A11
chr3L	8891162	8891362	201	*	6.44028	5.92847	6.8173	-0.133903	0.0098935	0.625214	78.46	41.26	62.99	125.36	98.38	114.59	3	3	+	+	+	+	+	+	Mcm7
chr2L	11168817	11169017	201	*	5.45742	4.4064	6.059	-0.133956	0.00995994	0.627686	20.4	16.05	27.17	134.65	46.82	18.55	1	1	-	-	+	+	-	-	Ca-beta
chr2L	16791391	16791591	201	*	5.541	4.24359	6.21287	-0.11721	0.00997554	0.627686	12.55	18.34	25.94	176.43	30.82	15.28	1	1	-	-	+	+	-	-	Cyt-b5-r
chr3L	13538084	13538284	201	*	4.6834	5.19046	3.89465	0.146369	0.0100055	0.62795	51.79	35.53	22.23	9.29	18.96	16.37	0	2	-	-	-	-	+	+	bru3
chr2L	7188706	7188906	201	*	7.26902	6.21408	7.87184	-0.133173	0.0100329	0.62795	45.51	40.12	137.09	461.51	172.45	68.75	3	3	+	+	+	+	+	+	CG4496
chr3R	24769175	24769375	201	*	6.26457	5.17986	6.8767	-0.131216	0.010047	0.62795	15.69	26.36	66.69	194.07	126.82	31.65	3	3	+	+	+	+	+	+	CG13631
chr2R	18518111	18518311	201	*	5.57942	4.13594	6.28635	-0.106789	0.0100716	0.62795	7.85	10.32	34.58	189.43	27.26	17.46	2	3	-	+	+	+	+	+	CG43066
chr3R	11562788	11562988	201	*	5.93262	4.64319	6.60246	-0.116686	0.010087	0.62795	15.69	16.05	43.23	209.86	66.37	15.28	3	2	+	+	+	+	+	-	sea
chr3L	14650192	14650392	201	*	5.47133	5.92107	4.81436	0.143557	0.0101212	0.628507	67.48	55.02	59.28	13.93	35.56	34.92	3	3	+	+	+	+	+	+	dlp
chr2R	21000136	21000336	201	*	6.75613	5.76945	7.33662	-0.136531	0.0101389	0.628507	42.37	44.7	76.57	343.58	75.86	65.48	1	1	-	-	+	+	-	-	CG10543
chr2R	23443922	23444122	201	*	5.88655	4.68879	6.53183	-0.122467	0.0101641	0.628737	20.4	29.8	27.17	211.72	46.23	19.64	1	1	-	+	-	+	-	-	FBgn0026384
chrX	3345733	3345933	201	*	5.38503	5.89858	4.58025	0.143364	0.0102432	0.632292	89.45	40.12	49.4	11.14	21.33	39.29	1	1	-	-	+	+	-	-	FBgn0266180
chrX	9331640	9331840	201	*	4.6392	3.885	5.13196	-0.14357	0.0103087	0.632476	10.98	16.05	17.29	37.14	46.23	21.83	3	3	+	+	+	+	+	+	Zdhhc8
chr3L	616740	616940	201	*	7.18985	6.46529	7.66993	-0.143371	0.0103311	0.632476	87.88	56.17	121.03	343.58	158.23	109.13	2	0	-	+	+	-	-	-	FBgn0261636
chrX	9255130	9255330	201	*	6.12568	5.48279	6.56884	-0.141038	0.0103481	0.632476	37.66	29.8	66.69	127.22	81.19	76.39	0	2	-	-	-	+	-	+	ric8a
chr2R	17683088	17683288	201	*	7.37398	6.71662	7.8239	-0.141697	0.0103508	0.632476	81.6	57.31	176.61	287.86	221.64	170.25	3	3	+	+	+	+	+	+	Sema1b
chr2L	16858343	16858543	201	*	5.16182	4.38269	5.66494	-0.142206	0.0104247	0.632476	18.83	9.17	34.58	67.79	46.23	38.2	1	3	-	+	-	+	+	+	CG31809
chrX	8569079	8569279	201	*	5.92858	5.0855	6.45721	-0.140671	0.01043	0.632476	23.54	25.22	53.11	136.5	88.89	38.2	1	2	-	-	+	+	+	-	Trf4-1
chr2R	24884731	24884931	201	*	5.42265	5.86482	4.78183	0.140185	0.0104399	0.632476	43.94	48.14	82.75	36.21	26.67	19.64	1	3	-	+	-	+	+	+	NKAIN
chr3L	5771256	5771456	201	*	6.38023	5.90971	6.73445	-0.122104	0.0104516	0.632476	61.2	56.17	62.99	131.86	94.82	92.76	2	3	-	+	+	+	+	+	Ppat-Dpck
chr3L	16029114	16029314	201	*	5.91806	5.40337	6.29663	-0.129112	0.0104677	0.632476	40.8	35.53	50.64	87.29	84.15	64.39	2	2	+	-	+	-	+	+	Notum
chr3R	24295809	24296009	201	*	6.35512	5.90812	6.69589	-0.118297	0.0104701	0.632476	70.62	52.73	56.81	111.43	94.82	104.77	3	3	+	+	+	+	+	+	CG5715
chr3L	12408602	12408802	201	*	6.46889	5.18546	7.13717	-0.114137	0.0104881	0.632476	17.26	25.22	66.69	322.22	71.71	28.37	2	3	+	-	+	+	+	+	SCaMC
chr3L	20185228	20185428	201	*	6.09346	5.14243	6.66173	-0.135156	0.0105092	0.632476	34.52	34.39	37.05	208.93	53.34	41.47	1	2	-	-	+	+	+	-	CG42674
chr3L	18307443	18307643	201	*	4.80227	5.31709	3.99429	0.140694	0.0105627	0.632476	67.48	28.66	23.47	12.07	17.19	18.55	1	2	-	-	+	+	+	-
chr2L	19022065	19022265	201	*	5.31408	3.95904	6.00032	-0.109115	0.010563	0.632476	7.85	9.17	29.64	149.5	27.26	15.28	1	3	-	-	+	+	+	+	CG15172
chr2R	9274948	9275148	201	*	5.95623	5.16209	6.46548	-0.14073	0.0105705	0.632476	23.54	33.24	50.64	145.79	73.49	45.84	3	3	+	+	+	+	+	+	Pkn
chr3L	25675665	25675865	201	*	6.15555	6.53214	5.64452	0.126432	0.0106132	0.632712	89.45	105.45	82.75	37.14	61.63	51.29	0	2	-	-	-	+	-	+
chr2L	6817503	6817703	201	*	6.61245	5.42828	7.25392	-0.119684	0.0106201	0.632712	32.95	33.24	62.99	361.22	56.3	40.38	3	3	+	+	+	+	+	+
chr3L	10254254	10254454	201	*	6.33442	6.80413	5.63346	0.140208	0.0106393	0.632712	178.89	102.02	54.34	39.93	53.34	55.66	0	2	-	-	-	+	+	-
chr2R	13677663	13677863	201	*	4.70495	5.1928	3.96232	0.140253	0.0106714	0.633338	43.94	43.56	22.23	10.21	13.63	22.92	1	2	-	-	+	+	+	-	CG17716
chr2R	22373254	22373454	201	*	6.59749	5.53127	7.20386	-0.126477	0.0107317	0.635627	37.66	34.39	66.69	319.43	83.56	39.29	2	2	-	+	+	+	+	-	Liprin-gamma
chrX	10924760	10924960	201	*	5.31139	5.79943	4.56829	0.139294	0.0107785	0.636417	56.49	71.07	39.52	11.14	20.74	39.29	2	3	+	-	+	+	+	+	v
chr3L	8741077	8741277	201	*	5.29984	4.03707	5.96274	-0.11311	0.0107886	0.636417	12.55	4.58	32.11	126.29	44.45	16.37	3	3	+	+	+	+	+	+	Prm
chr2L	12527664	12527864	201	*	4.78112	4.14761	5.21983	-0.136788	0.0108361	0.636531	23.54	16.05	13.59	37.14	33.19	41.47	1	2	-	-	+	+	+	-	bun
chr2R	7150555	7150755	201	*	6.77685	5.58067	7.42169	-0.11721	0.0108382	0.636531	25.11	17.19	101.27	302.72	171.27	40.38	3	3	+	+	+	+	+	+	pk
chr2R	2483847	2484047	201	*	5.15725	5.63247	4.4438	0.138324	0.0108574	0.636531	80.03	36.68	32.11	18.57	24.89	21.83	3	3	+	+	+	+	+	+
chr3L	15104474	15104674	201	*	7.50215	6.7023	8.01371	-0.137698	0.0108933	0.636531	69.05	63.04	180.31	429.94	213.35	132.05	1	2	-	-	+	-	+	+	FBgn0264703
chr3L	9340950	9341150	201	*	5.14915	4.16219	5.72974	-0.129971	0.0109478	0.636531	7.85	13.75	32.11	91.93	43.26	24.01	3	3	+	+	+	+	+	+	PGRP-LC
chr3L	18791334	18791534	201	*	5.32792	4.09523	5.98279	-0.114805	0.0109611	0.636531	4.71	20.63	25.94	138.36	28.45	22.92	1	1	-	-	+	+	-	-	ftz-f1
chr3L	24723795	24723995	201	*	7.79156	7.43536	8.077	-0.0944489	0.0109625	0.636531	169.48	155.89	193.9	293.43	295.13	221.54	0	2	-	-	-	-	+	+	scro
chr2R	17852276	17852476	201	*	5.62655	5.00388	6.06008	-0.134368	0.0110015	0.636531	34.52	32.09	29.64	97.5	49.19	53.47	1	3	-	-	+	+	+	+	olf186-F
chr2R	10421027	10421227	201	*	6.26284	5.79643	6.61473	-0.118254	0.011003	0.636531	64.34	49.29	53.11	80.79	108.45	104.77	0	2	-	-	-	+	+	-	CG11825
chr3L	3792384	3792584	201	*	4.9975	5.49774	4.22536	0.137123	0.0110081	0.636531	53.35	38.97	43.23	6.5	20.15	29.47	1	1	-	-	+	-	-	+	CG32264
chr2L	13098258	13098458	201	*	5.59864	4.20142	6.29494	-0.103296	0.0110376	0.636982	9.42	14.9	30.88	190.36	33.19	12	1	2	+	-	-	-	+	+
chrX	12090464	12090664	201	*	6.35038	6.73252	5.82904	0.123993	0.0111797	0.640548	120.83	72.21	125.97	67.79	50.37	52.38	1	3	+	-	-	+	+	+	FBgn0040859
chr3L	10522482	10522682	201	*	5.17703	4.46238	5.65278	-0.135795	0.0111818	0.640548	23.54	24.07	18.53	79.86	36.15	34.92	2	1	+	+	-	-	-	+	Rbfox1
chr3R	30822135	30822335	201	*	5.62722	4.4491	6.26699	-0.115946	0.0112412	0.640548	7.85	20.63	37.05	153.22	59.26	18.55	3	3	+	+	+	+	+	+	cindr
chr2R	8203423	8203623	201	*	5.56045	5.95838	5.0091	0.127298	0.0112458	0.640548	59.63	67.63	59.28	21.36	33.78	41.47	2	3	+	-	+	+	+	+	LRP1
chr2L	6412146	6412346	201	*	5.7256	4.43854	6.39482	-0.108833	0.0112551	0.640548	10.98	19.49	34.58	200.57	27.85	24.01	1	1	-	-	+	+	-	-	CG13982
chrX	7706217	7706417	201	*	5.61384	4.99906	6.04356	-0.132432	0.0112738	0.640548	47.08	22.92	25.94	85.43	55.71	56.75	2	3	+	-	+	+	+	+	CHES-1-like
chr3R	25295546	25295746	201	*	5.23942	4.24757	5.82166	-0.126812	0.0112854	0.640548	14.12	20.63	22.23	113.29	36.74	19.64	1	1	-	-	+	-	+	-	CG31098
chr3L	4543243	4543443	201	*	6.49041	6.01137	6.84942	-0.1171	0.0113238	0.640548	73.75	64.19	55.58	136.5	88.3	121.14	1	1	-	-	+	-	+	-	CG11357
chr2R	6878625	6878825	201	*	6.01133	4.77881	6.66615	-0.111208	0.0113311	0.640548	25.11	10.32	46.93	194.07	94.23	16.37	0	2	-	-	-	+	+	-	CG9447
chrX	22862017	22862217	201	*	5.68205	5.04393	6.12295	-0.131907	0.0113658	0.640548	21.97	26.36	50.64	85.43	59.26	64.39	3	3	+	+	+	+	+	+	CG42346
chr3R	26188787	26188987	201	*	7.4516	7.00538	7.79192	-0.112331	0.0113783	0.640548	172.62	90.55	122.27	237.72	239.42	187.71	1	2	-	-	+	+	+	-	CG6073
chrX	6543913	6544113	201	*	6.42842	5.7477	6.88905	-0.133479	0.0113933	0.640548	40.8	40.12	80.28	179.22	97.78	78.58	3	2	+	+	+	-	+	+	CG34417
chrX	16866068	16866268	201	*	4.8312	5.29612	4.14096	0.133774	0.0114113	0.640548	48.65	47	22.23	15.79	14.22	22.92	2	2	+	-	+	-	+	+	CG13003
chr2R	10100861	10101061	201	*	8.39288	7.84467	8.78919	-0.12549	0.0114132	0.640548	266.77	137.55	285.29	645.37	347.87	333.94	3	3	+	+	+	+	+	+	14-3-3zeta
chr2R	14267819	14268019	201	*	6.82627	5.70071	7.45077	-0.117561	0.0114358	0.640548	29.82	44.7	81.51	392.79	89.49	42.56	1	3	-	+	-	+	+	+	CG8547
chr2L	1987453	1987653	201	*	5.64189	4.8377	6.1552	-0.13302	0.0114497	0.640548	25.11	29.8	30.88	125.36	55.71	32.74	1	2	-	-	+	+	+	-	Got2
chr3R	14051392	14051592	201	*	4.58946	2.9825	5.33079	-0.0887117	0.0115933	0.64604	1.57	1.15	21	80.79	29.04	10.91	1	2	-	-	+	+	+	-
chr3L	5666625	5666825	201	*	5.10059	4.15925	5.66546	-0.127188	0.0116141	0.64604	9.42	19.49	24.7	93.79	35.56	22.92	3	3	+	+	+	+	+	+	sif
chr2L	21623565	21623765	201	*	5.85404	5.04868	6.36782	-0.131695	0.0116141	0.64604	31.38	32.09	35.82	151.36	52.74	43.65	0	2	-	-	-	-	+	+	CG2201
chrX	12284764	12284964	201	*	5.15873	5.56713	4.58696	0.125496	0.0116658	0.6471	62.77	42.41	37.05	25.07	21.93	25.1	2	0	+	-	+	-	-	-	Ten-a
chr3L	1536751	1536951	201	*	6.91266	6.504	7.23075	-0.103427	0.0116774	0.6471	111.42	75.65	85.22	137.43	164.75	148.42	2	2	+	-	+	+	+	-	Iml1
chr3R	19628133	19628333	201	*	6.58044	6.92836	6.121	0.110501	0.0117433	0.648563	136.52	90.55	138.32	69.64	75.86	63.3	3	3	+	+	+	+	+	+	CG6231
chr3R	30134298	30134498	201	*	6.03959	4.6513	6.73378	-0.0993654	0.0117481	0.648563	17.26	14.9	43.23	247.93	60.45	10.91	2	3	+	-	+	+	+	+	CG31029
chr2L	14410366	14410566	201	*	6.88281	5.80775	7.49196	-0.118191	0.011776	0.64888	36.09	34.39	97.57	371.43	123.86	44.74	3	3	+	+	+	+	+	+	elB
chr3L	1916730	1916930	201	*	6.04731	6.49045	5.40443	0.128957	0.0118406	0.650027	125.54	67.63	76.57	26.93	37.93	62.21	1	1	-	-	+	+	-	-
chr2R	6235993	6236193	201	*	8.08246	7.30475	8.58501	-0.13041	0.0118413	0.650027	145.94	97.43	230.95	687.15	316.46	148.42	3	3	+	+	+	+	+	+	bin3
chr2R	21200330	21200530	201	*	6.45592	5.56895	7.00114	-0.1269	0.0119043	0.650355	40.8	27.51	74.1	236.79	91.86	55.66	2	2	+	-	+	-	+	+	CG44245
chr2L	13296203	13296403	201	*	6.89172	6.31399	7.30312	-0.124528	0.011943	0.650355	89.45	50.43	98.8	215.43	154.68	103.68	3	3	+	+	+	+	+	+	CG31729
chrX	6756455	6756655	201	*	6.59212	5.85789	7.07637	-0.129728	0.0119719	0.650355	40.8	34.39	98.8	196.86	118.53	89.49	3	3	+	+	+	+	+	+	sov
chr3R	23962969	23963169	201	*	7.13396	6.12666	7.72135	-0.120688	0.0119743	0.650355	40.8	52.73	116.09	403.94	178.97	50.2	3	2	+	+	+	-	+	+	CG31140
chr3L	22824758	22824958	201	*	6.79028	4.58641	7.62455	-0.0628423	0.011997	0.650355	14.12	17.19	40.76	503.29	59.26	29.47	1	2	-	-	+	+	+	-	jim
chr2L	20236120	20236320	201	*	5.11061	5.5453	4.48551	0.126205	0.012037	0.650355	64.34	42.41	33.35	16.71	24.3	26.19	2	3	+	-	+	+	+	+
chr2R	22614205	22614405	201	*	5.14222	3.80909	5.82308	-0.101153	0.0120424	0.650355	9.42	9.17	23.47	136.5	21.33	12	2	0	+	-	+	-	-	-	CG4329
chr2R	19799338	19799538	201	*	5.33087	5.80766	4.61384	0.128999	0.0120456	0.650355	81.6	32.09	54.34	14.86	30.22	28.37	1	2	-	-	+	+	+	-
chr3L	13494669	13494869	201	*	5.5848	4.52501	6.18915	-0.117444	0.0120719	0.650355	14.12	24.07	30.88	156.93	31.41	30.56	3	2	+	+	+	-	+	+	Tgi
chrX	19906824	19907024	201	*	5.0608	5.56102	4.2887	0.128693	0.0120755	0.650355	61.2	45.85	34.58	7.43	19.56	31.65	0	2	-	-	-	+	+	-	Hers
chr3L	15566180	15566380	201	*	6.3065	5.69083	6.73666	-0.125594	0.0120918	0.650355	37.66	48.14	69.16	150.43	100.75	68.75	3	2	+	+	+	-	+	+	dop
chr2L	2454673	2454873	201	*	8.22288	7.85592	8.51517	-0.0910274	0.0121702	0.650751	299.73	206.32	188.96	325.01	370.99	401.61	0	2	-	-	-	+	+	-	dpp
chr2L	4887673	4887873	201	*	6.4757	5.65729	6.99467	-0.127196	0.0121708	0.650751	40.8	38.97	71.63	213.58	122.08	46.93	1	1	-	+	-	-	+	-	CG15625
chr3R	22753799	22753999	201	*	6.387	5.4775	6.94048	-0.123781	0.0122184	0.650751	34.52	27.51	71.63	234	78.82	55.66	2	1	+	-	+	-	+	-	Usp12-46
chr3R	21015275	21015475	201	*	4.9671	4.13815	5.49022	-0.126657	0.0122199	0.650751	15.69	14.9	22.23	78.93	30.82	25.1	3	2	+	+	+	-	+	+	Calx
chr3L	199199	199399	201	*	8.25794	7.82389	8.59115	-0.104022	0.0122564	0.650751	241.66	163.91	274.17	507.01	331.28	318.67	1	2	-	-	+	+	+	-	rno
chr2L	5300441	5300641	201	*	6.09033	4.76188	6.77003	-0.100118	0.0122656	0.650751	9.42	11.46	60.52	217.29	88.3	21.83	2	2	-	+	+	+	+	-	vri
chr2L	14997497	14997697	201	*	5.2054	4.01611	5.84832	-0.108148	0.0122935	0.650751	12.55	13.75	22.23	128.15	33.78	10.91	2	2	+	+	-	-	+	+	mol
chr2L	22336212	22336412	201	*	5.29656	4.66805	5.73289	-0.124532	0.0122954	0.650751	17.26	19.49	39.52	57.57	47.41	54.57	1	2	+	-	-	-	+	+	Marf1
chrX	20231478	20231678	201	*	5.39838	4.73375	5.85166	-0.126592	0.0123124	0.650751	37.66	13.75	28.41	40.86	59.26	73.12	3	2	+	+	+	-	+	+	sw
chr3R	26117537	26117737	201	*	6.08851	4.71766	6.77856	-0.0969501	0.012388	0.650751	15.69	12.61	50.64	260.93	50.97	17.46	3	3	+	+	+	+	+	+	CG31324
chr2R	7959700	7959900	201	*	6.3981	5.69857	6.86719	-0.126415	0.0123953	0.650751	42.37	34.39	79.04	181.07	89.49	79.67	1	2	-	+	-	-	+	+	nito
chr2R	21362838	21363038	201	*	6.27538	5.71857	6.67613	-0.118716	0.01247	0.650751	51.79	48.14	58.05	143	69.93	93.85	3	3	+	+	+	+	+	+	cv-2
chr2R	22546555	22546755	201	*	7.37507	6.58811	7.8814	-0.125474	0.0125069	0.650751	80.03	65.34	143.26	400.22	219.87	87.31	3	3	+	+	+	+	+	+	px
chr3L	9671465	9671665	201	*	5.19755	4.24585	5.76605	-0.120141	0.0125082	0.650751	12.55	17.19	27.17	104	38.52	20.74	1	1	-	-	+	+	-	-	fry
chr2R	9408907	9409107	201	*	5.89503	4.74287	6.52735	-0.109007	0.0125139	0.650751	17.26	14.9	48.17	197.79	52.74	26.19	2	0	+	+	-	-	-	-	wun
chr2R	6070448	6070648	201	*	5.02654	5.44063	4.44347	0.120647	0.0125204	0.650751	50.22	50.43	29.64	20.43	21.93	22.92	3	3	+	+	+	+	+	+
chr2L	1362328	1362528	201	*	6.33354	5.22478	6.95301	-0.111398	0.012524	0.650751	23.54	19.49	69.16	247	93.04	31.65	1	2	+	-	-	+	+	-	CG31659
chr2L	8266845	8267045	201	*	5.95127	5.3528	6.37301	-0.121719	0.0125256	0.650751	37.66	35.53	49.4	119.79	69.93	58.93	2	3	+	-	+	+	+	+	Btk29A
chr3R	14738943	14739143	201	*	5.81897	5.21737	6.24225	-0.121882	0.0125428	0.650751	34.52	25.22	51.87	98.43	67.56	61.11	2	3	+	-	+	+	+	+	eff
chr2R	21645999	21646199	201	*	8.34834	7.81346	8.73768	-0.116511	0.012544	0.650751	268.34	157.03	249.47	657.44	324.17	299.02	0	2	-	-	-	-	+	+	CG10082
chr3L	9096906	9097106	201	*	4.97962	4.18922	5.48736	-0.12465	0.0126191	0.651339	18.83	14.9	21	77.07	30.22	27.28	2	1	-	+	+	-	+	-	CG13315
chr3L	11487366	11487566	201	*	8.147	7.82276	8.41157	-0.0787156	0.0126219	0.651339	255.79	193.71	229.71	359.36	368.61	293.57	1	1	-	+	-	-	-	+	chrb
chrX	20496401	20496601	201	*	5.53195	4.91934	5.96061	-0.12155	0.0126743	0.651339	28.25	21.78	40.76	83.57	49.78	53.47	2	2	+	-	+	+	+	-	RhoGAP19D
chrX	4545005	4545205	201	*	5.65397	5.03174	6.08729	-0.122135	0.0127199	0.651339	32.95	19.49	45.7	80.79	74.08	49.11	3	3	+	+	+	+	+	+	Usf
chr2R	24243029	24243229	201	*	6.42982	5.24585	7.07123	-0.105895	0.0127301	0.651339	25.11	34.39	54.34	317.58	57.48	28.37	3	3	+	+	+	+	+	+	nord
chr2R	9810723	9810923	201	*	6.05016	5.46215	6.46672	-0.120224	0.0127341	0.651339	56.49	42.41	33.35	119.79	87.71	57.84	2	3	+	+	-	+	+	+
chr3L	3702471	3702671	201	*	5.79602	6.20993	5.2133	0.118491	0.012783	0.651339	67.48	92.85	61.75	26	50.37	34.92	2	2	+	-	+	-	+	+
chrX	17937596	17937796	201	*	5.32518	5.74351	4.73361	0.118789	0.0127967	0.651339	72.19	52.73	35.82	27.86	29.04	22.92	3	3	+	+	+	+	+	+	Sh
chr2R	18718030	18718230	201	*	6.28321	5.24004	6.88228	-0.113329	0.012819	0.651339	26.68	28.66	58.05	255.36	59.26	39.29	3	3	+	+	+	+	+	+	Hs3st-A
chr2R	1925189	1925389	201	*	4.85433	5.32685	4.14704	0.12352	0.0128281	0.651339	50.22	50.43	19.76	19.5	18.37	15.28	2	3	+	-	+	+	+	+	CG17684
chr2L	18845036	18845236	201	*	5.75304	4.98132	6.25311	-0.123519	0.0128319	0.651339	26.68	29.8	38.29	131.86	59.86	37.1	3	3	+	+	+	+	+	+	CG17321
chr2R	8145913	8146113	201	*	7.18988	6.48404	7.66176	-0.123523	0.0128352	0.651339	62.77	69.92	135.85	325.93	178.97	102.58	1	1	-	-	+	+	-	-	Lpin
chr3R	7753651	7753851	201	*	5.65782	4.32328	6.33903	-0.096889	0.0128756	0.651339	7.85	27.51	24.7	196.86	29.63	16.37	0	2	-	-	-	+	+	-
chr2L	3124733	3124933	201	*	6.39845	5.07998	7.07565	-0.0972994	0.0128773	0.651339	26.68	22.92	51.87	331.51	55.71	17.46	3	3	+	+	+	+	+	+	toc
chrX	13404555	13404755	201	*	6.92762	6.16204	7.42514	-0.123162	0.0128892	0.651339	78.46	41.26	95.1	295.29	142.82	77.48	1	2	+	-	-	+	+	-	CG12725
chr3L	10277744	10277944	201	*	4.66169	5.22115	3.7356	0.118729	0.0129328	0.651421	54.92	13.75	43.23	6.5	16	17.46	0	2	-	-	-	+	+	-
chr3R	26769117	26769317	201	*	4.71869	5.15436	4.09156	0.119898	0.0129354	0.651421	34.52	38.97	33.35	16.71	21.33	13.1	0	2	-	-	-	-	+	+	FBgn0267123
chr3L	18760757	18760957	201	*	5.27334	4.19444	5.88367	-0.110465	0.0130031	0.652785	9.42	18.34	27.17	105.86	59.26	12	1	2	-	-	+	+	+	-	ftz-f1
chrX	3740779	3740979	201	*	7.95045	7.57127	8.25042	-0.0895374	0.0130071	0.652785	225.97	143.28	201.31	335.22	254.24	324.12	3	3	+	+	+	+	+	+	Tlk
chrX	9667603	9667803	201	*	4.47889	3.75395	4.95914	-0.122243	0.0130557	0.654106	15.69	14.9	9.88	23.21	30.82	39.29	1	2	-	-	+	-	+	+	nej
chr2L	10801146	10801346	201	*	6.12917	4.93285	6.77406	-0.10309	0.0131198	0.65619	15.69	24.07	51.87	232.15	77.63	18.55	2	3	-	+	+	+	+	+	CG31869
chr2L	16859264	16859464	201	*	7.73942	8.06756	7.31397	0.0972289	0.0131696	0.657559	367.2	217.79	219.83	136.5	162.97	177.89	3	3	+	+	+	+	+	+	CG31809
chr3R	20557621	20557821	201	*	7.75156	7.40096	8.03339	-0.0823506	0.0132311	0.659506	189.88	146.72	170.43	310.15	241.2	234.63	1	1	-	-	+	-	+	-	CG5180
chr2L	19755099	19755299	201	*	6.7365	6.0619	7.19435	-0.120153	0.0132787	0.660753	72.19	66.48	61.75	247.93	74.67	116.77	3	3	+	+	+	+	+	+	CG10631
chr2L	18677066	18677266	201	*	6.54186	6.03604	6.91563	-0.109349	0.0133173	0.661521	83.17	47	66.69	154.15	112.01	96.04	2	3	+	-	+	+	+	+	Mst36Fa
chr3R	16280799	16280999	201	*	6.8979	6.41534	7.25888	-0.105601	0.0133395	0.661521	81.6	75.65	98.8	209.86	133.93	115.68	0	2	-	-	-	+	+	-	gish
chr3R	15451844	15452044	201	*	5.4775	4.32785	6.10909	-0.10445	0.0133846	0.661521	14.12	26.36	19.76	156.93	33.78	16.37	2	1	+	+	-	-	-	+	AdamTS-A
chrX	3255926	3256126	201	*	6.52834	5.2639	7.19168	-0.0976637	0.0133984	0.661521	31.38	17.19	66.69	349.15	61.04	28.37	1	2	-	-	+	+	+	-	dnc
chrX	17963210	17963410	201	*	5.46836	4.35633	6.08881	-0.106291	0.0134072	0.661521	17.26	19.49	24.7	155.07	20.74	28.37	3	3	+	+	+	+	+	+	Sh
chrX	10463452	10463652	201	*	5.18962	4.43472	5.68267	-0.119359	0.0134623	0.663118	40.8	8.02	16.06	45.5	55.11	53.47	3	3	+	+	+	+	+	+	nocte
chr3L	19908846	19909046	201	*	7.51061	7.15328	7.79678	-0.0823121	0.0135479	0.664094	136.52	123.79	166.73	249.79	218.68	198.62	2	3	+	-	+	+	+	+	Su(Tpl)
chr2R	14024697	14024897	201	*	7.4587	6.40734	8.06039	-0.108495	0.0135623	0.664094	53.35	48.14	153.14	548.8	192.01	60.02	3	3	+	+	+	+	+	+	mam
chr2L	11203831	11204031	201	*	5.7968	4.72423	6.40516	-0.107384	0.0135876	0.664094	21.97	25.22	32.11	191.29	30.22	32.74	1	2	-	-	+	+	+	-	Ca-beta
chr3R	24543765	24543965	201	*	5.99724	4.72883	6.66162	-0.0966941	0.0135949	0.664094	15.69	20.63	43.23	245.15	36.74	21.83	3	3	+	+	+	+	+	+	CG5789
chrX	8829462	8829662	201	*	6.12199	6.54059	5.52989	0.115003	0.013614	0.664094	131.82	73.36	74.1	42.72	32.59	63.3	2	3	+	-	+	+	+	+
chr3L	3149073	3149273	201	*	6.95298	6.41025	7.34642	-0.111199	0.0136182	0.664094	98.86	55.02	101.27	223.79	148.75	115.68	3	3	+	+	+	+	+	+	Usp5
chr2L	8463907	8464107	201	*	5.71232	4.83541	6.2538	-0.115597	0.0137113	0.665081	21.97	22.92	40.76	145.79	43.85	39.29	3	3	+	+	+	+	+	+	Agpat2
chr2R	18783151	18783351	201	*	5.41148	4.3023	6.03107	-0.104918	0.0137126	0.665081	14.12	24.07	21	146.72	32	17.46	2	2	+	-	+	-	+	+	CG15080
chr2R	8024429	8024629	201	*	6.22082	5.1405	6.83159	-0.106143	0.0137345	0.665081	17.26	20.63	67.93	206.15	106.08	29.47	0	2	-	-	-	+	+	-	FBgn0266805
chr3R	2134391	2134591	201	*	5.21863	5.6675	4.56351	0.116538	0.0137727	0.665081	45.51	69.92	37.05	13.93	30.82	26.19	2	3	+	-	+	+	+	+	Myo81F
chr3L	6610044	6610244	201	*	5.18944	4.19513	5.7725	-0.109985	0.0137882	0.665081	21.97	20.63	12.35	114.22	29.04	20.74	1	2	-	-	+	-	+	+	axed
chr2R	24813754	24813954	201	*	8.09236	7.7521	8.36749	-0.0777449	0.0138122	0.665081	263.63	187.98	195.13	368.65	290.39	331.76	2	3	+	-	+	+	+	+	Dll
chr3R	7885466	7885666	201	*	5.51233	6.05036	4.64462	0.115386	0.0138263	0.665081	103.57	45.85	49.4	7.43	33.78	33.83	1	2	-	-	+	+	+	-	CG17816
chr3R	31776886	31777086	201	*	6.1592	5.56347	6.57959	-0.113615	0.0138524	0.665081	40.8	50.43	50.64	130.93	102.52	53.47	2	3	+	-	+	+	+	+	faf
chr3R	4544614	4544814	201	*	5.33565	5.74798	4.7561	0.111641	0.0138586	0.665081	75.32	38.97	46.93	26.93	29.04	25.1	2	2	+	+	-	-	+	+	CG34357
chr2L	13296785	13296985	201	*	5.71136	5.2164	6.0792	-0.105068	0.0138658	0.665081	40.8	27.51	43.23	65.93	68.15	68.75	3	3	+	+	+	+	+	+	CG31729
chr2L	8346389	8346589	201	*	6.00388	4.95269	6.60551	-0.106115	0.0140148	0.668504	20.4	20.63	51.87	182	88.3	21.83	3	3	+	+	+	+	+	+	CG7778
chr2R	10219649	10219849	201	*	7.42138	6.614	7.93596	-0.115539	0.0140318	0.668504	78.46	57.31	158.08	400.22	247.13	87.31	1	2	-	-	+	-	+	+	Hr3
chrX	1106226	1106426	201	*	5.64054	6.05308	5.06056	0.110835	0.0140466	0.668504	94.15	47	58.05	27.86	37.34	34.92	3	3	+	+	+	+	+	+	CG3655
chr2R	10564905	10565105	201	*	5.76487	4.89672	6.30307	-0.113615	0.0140919	0.668504	28.25	24.07	37.05	154.15	45.63	37.1	1	2	-	-	+	+	+	-	psq
chr3L	1102374	1102574	201	*	7.26603	6.66643	7.68834	-0.112533	0.014099	0.668504	91.02	63.04	150.67	275.79	217.49	125.5	1	2	-	+	-	+	+	-	bab1
chr3R	21714217	21714417	201	*	5.47219	5.86063	4.939	0.106754	0.0141045	0.668504	56.49	57.31	60.52	21.36	37.93	32.74	2	1	+	+	-	-	+	-	CG31176
chrX	17699151	17699351	201	*	6.40793	5.65325	6.90088	-0.115752	0.0141234	0.668504	47.08	29.8	74.1	204.29	80	74.21	1	1	+	-	-	-	-	+	CG8188
chr3R	26259067	26259267	201	*	6.75003	6.10707	7.19322	-0.114388	0.0141256	0.668504	70.62	59.6	76.57	221.93	150.53	66.57	3	3	+	+	+	+	+	+	Ald1
chr3R	28682170	28682370	201	*	5.89304	4.8322	6.49773	-0.104944	0.0141669	0.668504	15.69	24.07	45.7	170.86	80.6	19.64	1	1	-	-	+	-	-	+	snu
chr3L	12296205	12296405	201	*	5.36178	4.50087	5.89723	-0.113652	0.0141708	0.668504	14.12	22.92	30.88	110.5	35.56	32.74	1	1	-	-	+	-	+	-	CG4328
chr2L	6082420	6082620	201	*	5.86481	4.62228	6.52233	-0.0952276	0.0141885	0.668504	17.26	18.34	38.29	213.58	48	14.19	2	2	+	+	-	-	+	+	Kr-h1
chr3L	21192105	21192305	201	*	5.30849	4.27934	5.90303	-0.106036	0.014242	0.669369	18.83	17.19	22.23	130.93	27.85	20.74	1	1	+	-	-	-	-	+	CG42337
chr2R	11704808	11705008	201	*	4.69098	5.1158	4.08625	0.111835	0.0142526	0.669369	26.68	37.83	39.52	16.71	18.96	15.28	3	3	+	+	+	+	+	+	Ir48b
chr3R	23334470	23334670	201	*	6.45097	5.47964	7.02625	-0.108496	0.0142883	0.669526	25.11	30.95	77.81	195.93	162.38	32.74	1	2	-	+	-	-	+	+	pnt
chr2R	14640943	14641143	201	*	5.30535	4.63896	5.75944	-0.113801	0.0143092	0.669526	18.83	27.51	28.41	82.64	43.85	36.01	1	1	-	+	-	-	+	-	CG12862
chr3R	19509011	19509211	201	*	6.34333	5.11649	6.99661	-0.0954605	0.0143303	0.669526	15.69	22.92	65.46	281.36	78.82	22.92	3	3	+	+	+	+	+	+	Dys
chrX	14649800	14650000	201	*	6.37938	6.86171	5.64964	0.114569	0.0143475	0.669526	152.22	75.65	121.03	19.5	56.89	74.21	3	3	+	+	+	+	+	+	NetA
chr2R	15990122	15990322	201	*	5.55396	4.76908	6.05944	-0.113882	0.0144208	0.670374	18.83	32.09	30.88	117.93	45.04	37.1	3	3	+	+	+	+	+	+	CG8314
chrX	13341726	13341926	201	*	4.8562	4.27714	5.26828	-0.109176	0.0144295	0.670374	18.83	18.34	21	43.64	33.78	38.2	3	3	+	+	+	+	+	+
chr2R	9861866	9862066	201	*	6.29237	5.39942	6.83981	-0.110858	0.0144606	0.670374	25.11	44.7	56.81	211.72	94.82	37.1	3	3	+	+	+	+	+	+	PCB
chr3L	20186289	20186489	201	*	7.43305	6.77455	7.8835	-0.112947	0.0144688	0.670374	98.86	81.38	148.2	371.43	231.13	105.86	1	1	-	-	+	+	-	-	Ssk
chr3L	9442735	9442935	201	*	5.62826	5.10963	6.00895	-0.104834	0.0144848	0.670374	42.37	22.92	38.29	62.22	62.23	68.75	2	2	-	+	+	+	+	-	Nf-YA
chr2R	9937782	9937982	201	*	6.31064	5.75201	6.71233	-0.107617	0.0145056	0.670374	51.79	48.14	61.75	152.29	92.45	69.84	3	3	+	+	+	+	+	+	Mef2
chr2R	17846522	17846722	201	*	5.90018	4.76294	6.52813	-0.0990146	0.0145751	0.670374	18.83	20.63	41.99	210.79	42.08	24.01	1	2	+	-	-	-	+	+	olf186-M
chr3R	14722330	14722530	201	*	7.0059	6.44664	7.40791	-0.107377	0.014587	0.670374	92.59	49.29	119.8	224.72	150.53	134.23	3	3	+	+	+	+	+	+	kibra
chr3R	10393493	10393693	201	*	5.2475	4.17678	5.85528	-0.102721	0.0145889	0.670374	6.28	18.34	29.64	112.36	43.85	17.46	3	3	+	+	+	+	+	+	cwo
chr3L	19580860	19581060	201	*	5.61817	4.70033	6.17468	-0.10925	0.0145948	0.670374	20.4	21.78	35.82	144.86	39.11	32.74	1	2	-	-	+	+	+	-	Shal
chr3R	16702955	16703155	201	*	8.58399	8.26246	8.84676	-0.0706063	0.0146497	0.671151	368.77	249.88	302.58	509.79	433.8	437.62	0	2	-	-	-	+	+	-	Ubx
chrX	14897278	14897478	201	*	5.81663	6.29047	5.10634	0.112752	0.0146638	0.671151	123.97	67.63	43.23	21.36	36.15	45.84	0	2	-	-	-	+	+	-	CG9514
chr2L	6709073	6709273	201	*	6.48876	5.42417	7.09463	-0.102036	0.0146805	0.671151	34.52	26.36	67.93	271.15	113.78	25.1	1	2	-	-	+	+	+	-	Tsp
chr3L	1967800	1968000	201	*	5.27834	4.47203	5.7925	-0.111807	0.01471	0.67138	23.54	18.34	24.7	100.29	40.89	25.1	2	3	-	+	+	+	+	+	CG1927
chr2R	14027293	14027493	201	*	5.78164	4.94875	6.3063	-0.111222	0.0147314	0.67138	26.68	25.22	40.76	149.5	42.08	45.84	3	3	+	+	+	+	+	+	mam
chr3L	4102510	4102710	201	*	6.83786	6.3021	7.22765	-0.104432	0.0147865	0.671439	83.17	58.46	95.1	216.36	127.42	105.86	3	3	+	+	+	+	+	+	CG14995
chr2R	7885998	7886198	201	*	6.81529	5.99682	7.33429	-0.111103	0.0147946	0.671439	67.48	40.12	83.98	275.79	157.05	51.29	3	3	+	+	+	+	+	+	Dgk
chr3R	5802114	5802314	201	*	5.44868	4.25771	6.09207	-0.0951407	0.01483	0.671439	17.26	24.07	16.06	164.36	19.56	20.74	1	1	-	-	+	-	+	-	CG11000
chr2R	10123773	10123973	201	*	6.24115	5.57865	6.69345	-0.110963	0.0148783	0.671439	48.65	36.68	58.05	157.86	101.34	51.29	1	2	-	-	+	+	+	-	Ccs
chrX	18483763	18483963	201	*	6.3725	5.24637	6.99717	-0.0981623	0.0148814	0.671439	21.97	25.22	66.69	286	63.41	33.83	2	2	+	-	+	+	+	-	Hayan
chr3R	16923644	16923844	201	*	6.79702	6.28091	7.17636	-0.101992	0.0149252	0.671439	84.74	43.56	104.98	134.65	141.05	158.24	1	2	-	-	+	-	+	+	FBgn0264857
chr3R	9436620	9436820	201	*	7.0846	6.00626	7.69476	-0.100126	0.0149547	0.671439	36.09	33.24	123.5	406.72	170.08	44.74	3	2	+	+	+	-	+	+	ps
chr3L	311613	311813	201	*	6.38329	5.27266	7.00331	-0.098522	0.0149553	0.671439	31.38	24.07	60.52	296.22	51.56	37.1	3	3	+	+	+	+	+	+	fwd
chr2R	4272491	4272691	201	*	6.02169	6.42353	5.46279	0.104547	0.0149605	0.671439	122.4	73.36	61.75	43.64	51.56	37.1	3	3	+	+	+	+	+	+
chrX	12634019	12634219	201	*	6.24205	5.64291	6.66413	-0.107685	0.0149798	0.671439	40.8	42.41	66.69	149.5	72.89	81.85	1	1	+	-	-	+	-	-	Tomosyn
chrX	3452233	3452433	201	*	5.61802	6.07881	4.93696	0.110717	0.0149851	0.671439	67.48	38.97	96.33	17.64	34.97	39.29	1	1	-	-	+	-	+	-	FBgn0266350
chr2L	21629280	21629480	201	*	8.34292	7.85305	8.70796	-0.0984085	0.0150702	0.672104	284.03	165.06	244.53	617.51	340.17	296.84	3	3	+	+	+	+	+	+	Df31
chrX	14743610	14743810	201	*	6.83749	7.31282	6.12382	0.110451	0.0151187	0.672104	233.82	97.43	145.73	30.64	70.52	108.04	1	1	-	-	+	-	+	-	NetB
chrX	7275766	7275966	201	*	5.31518	5.70378	4.78168	0.102805	0.0151209	0.672104	61.2	47	48.17	20.43	26.08	36.01	1	1	+	-	-	-	+	-	FBgn0265457
chrX	11689657	11689857	201	*	6.06551	5.46329	6.4891	-0.107299	0.0151261	0.672104	40.8	29.8	61.75	60.36	91.26	117.86	2	3	+	-	+	+	+	+	bif
chrX	13280408	13280608	201	*	5.96583	4.96283	6.55179	-0.103054	0.0151284	0.672104	17.26	19.49	56.81	186.65	53.34	41.47	2	3	+	-	+	+	+	+	HDAC4
chr3L	14352161	14352361	201	*	4.85655	4.28102	5.26685	-0.105423	0.0151378	0.672104	20.4	20.63	17.29	38.07	33.78	43.65	1	1	-	-	+	-	+	-	fz
chr3R	18358663	18358863	201	*	5.45024	4.56354	5.99537	-0.107467	0.0152114	0.672531	12.55	27.51	30.88	120.72	37.93	32.74	3	3	+	+	+	+	+	+	CG15803
chr2L	3718666	3718866	201	*	4.86888	3.9837	5.41344	-0.107131	0.0152769	0.672531	14.12	16.05	17.29	78.93	18.37	30.56	3	2	+	+	+	-	+	+	Shaw
chrX	11559966	11560166	201	*	5.97978	4.8086	6.61757	-0.0938761	0.0152771	0.672531	36.09	18.34	29.64	235.86	24.89	33.83	3	3	+	+	+	+	+	+	CG1572
chr2R	7546956	7547156	201	*	6.10076	5.26037	6.62835	-0.108214	0.0152808	0.672531	39.23	42.41	33.35	195	45.04	56.75	1	2	-	-	+	+	+	-	Corin
chr2L	13803454	13803654	201	*	6.095	4.92617	6.73212	-0.0937858	0.0154261	0.672531	14.12	25.22	51.87	246.08	37.93	34.92	3	3	+	+	+	+	+	+	CAH1
chr3R	10614326	10614526	201	*	8.79039	8.48575	9.04179	-0.0642498	0.0154382	0.672531	403.3	299.17	372.97	594.3	492.47	494.37	0	2	-	-	-	+	+	-	hth
chr3R	13804446	13804646	201	*	5.45283	4.43384	6.04407	-0.100862	0.015444	0.672531	14.12	14.9	35.82	134.65	41.48	21.83	1	2	-	+	-	-	+	+
chr2L	7551190	7551390	201	*	4.86067	5.27798	4.27114	0.1048	0.0154568	0.672531	47.08	29.8	39.52	14.86	20.15	22.92	3	3	+	+	+	+	+	+	RapGAP1
chr2R	12261459	12261659	201	*	7.4627	6.95237	7.83893	-0.0991358	0.0154617	0.672531	169.48	102.02	100.04	327.79	193.2	165.88	1	3	+	-	-	+	+	+	Cam
chr3L	27256219	27256419	201	*	5.22049	5.74552	4.38665	0.107725	0.015466	0.672531	75.32	58.46	27.17	7.43	30.22	25.1	2	3	-	+	+	+	+	+
chr2R	8061101	8061301	201	*	6.87034	6.48929	7.17149	-0.0800954	0.0154882	0.672531	98.86	76.8	93.86	146.72	128.6	157.15	0	3	-	-	-	+	+	+	CG12769
chrX	11198612	11198812	201	*	4.68201	5.112	4.06668	0.105928	0.0154925	0.672531	42.37	36.68	24.7	16.71	17.19	16.37	3	3	+	+	+	+	+	+
chr3R	1706929	1707129	201	*	5.30716	5.70421	4.75751	0.102005	0.0155121	0.672531	56.49	65.34	34.58	28.79	27.26	25.1	1	2	+	-	-	+	+	-	Myo81F
chr3R	11869420	11869620	201	*	6.86586	5.7818	7.47778	-0.0973558	0.0155171	0.672531	28.25	35.53	101.27	332.43	170.68	31.65	1	2	-	-	+	+	+	-	CG6959
chr2R	21072720	21072920	201	*	6.08268	4.78702	6.75411	-0.086993	0.015523	0.672531	21.97	27.51	33.35	274.86	32.59	16.37	1	2	-	-	+	+	+	-	Treh
chr3L	49729	49929	201	*	5.71747	6.07729	5.23698	0.0958217	0.0155277	0.672531	69.05	77.94	55.58	33.43	34.97	44.74	3	3	+	+	+	+	+	+
chr3R	11909972	11910172	201	*	4.95711	5.40444	4.3053	0.106891	0.0155382	0.672531	47.08	51.58	28.41	13	26.67	19.64	1	1	-	+	-	-	+	-	Cad87A
chr3L	25676202	25676402	201	*	4.73016	5.23375	3.94991	0.107651	0.0156345	0.673847	37.66	49.29	25.94	5.57	18.96	21.83	3	3	+	+	+	+	+	+
chr3R	5669831	5670031	201	*	6.28929	5.87256	6.61224	-0.0853388	0.015722	0.673847	53.35	61.9	60.52	103.07	103.12	87.31	3	3	+	+	+	+	+	+	Xe7
chr3L	8748948	8749148	201	*	5.53887	4.97849	5.94145	-0.102724	0.0157263	0.673847	42.37	27.51	24.7	79.86	58.67	45.84	3	3	+	+	+	+	+	+	CG13306
chr3L	12407189	12407389	201	*	6.22186	5.04641	6.86087	-0.0919594	0.0157422	0.673847	29.82	29.8	39.52	285.08	38.52	25.1	1	2	+	-	-	+	+	-	SCaMC
chr3R	8585168	8585368	201	*	5.53395	5.94597	4.955	0.10329	0.0157435	0.673847	75.32	67.63	41.99	21.36	30.22	41.47	3	3	+	+	+	+	+	+	5-HT2B
chrX	21080404	21080604	201	*	6.42763	6.88635	5.75112	0.106863	0.015749	0.673847	182.03	48.14	124.74	49.22	54.52	57.84	1	2	-	-	+	+	+	-	bves
chr2R	15675339	15675539	201	*	5.89567	5.42858	6.24796	-0.0929009	0.0157675	0.673847	45.51	35.53	48.17	86.36	72.89	68.75	3	3	+	+	+	+	+	+	fus
chr2L	9567606	9567806	201	*	6.91314	6.09963	7.43016	-0.106397	0.0157848	0.673847	56.49	50.43	98.8	337.08	99.56	80.76	1	2	-	+	-	+	+	-	jp
chr2L	18469725	18469925	201	*	4.76	4.15333	5.18577	-0.104369	0.0158287	0.673847	20.4	20.63	12.35	31.57	36.15	41.47	1	2	-	-	+	+	+	-	FBgn0262406
chr3R	11604795	11604995	201	*	7.23864	6.28825	7.80667	-0.101902	0.0158289	0.673847	43.94	43.56	146.97	360.29	252.46	58.93	0	3	-	-	-	+	+	+	Jupiter
chr3R	6170835	6171035	201	*	7.29519	6.79032	7.66845	-0.0969896	0.0158334	0.673847	122.4	67.63	142.03	248.86	216.31	145.15	3	3	+	+	+	+	+	+	Osi1
chr3R	30090314	30090514	201	*	5.91117	4.99394	6.46745	-0.103143	0.0158527	0.673847	23.54	26.36	45.7	176.43	56.3	32.74	1	1	-	-	+	+	-	-	sima
chrX	18417583	18417783	201	*	5.39736	5.83871	4.75829	0.105384	0.015868	0.673847	84.74	57.31	29.64	26.93	23.71	30.56	2	3	+	-	+	+	+	+
chr2L	18448867	18449067	201	*	6.32347	5.8591	6.67421	-0.0922784	0.0159993	0.678142	80.03	44.7	49.4	102.14	98.38	105.86	1	1	+	-	-	+	-	-	ncm
chr3L	6997528	6997728	201	*	5.4502	4.72323	5.93133	-0.106182	0.0160155	0.678142	26.68	22.92	29.64	105.86	37.93	39.29	3	3	+	+	+	+	+	+	Mp
chr3R	9866007	9866207	201	*	6.58459	5.74531	7.11174	-0.104578	0.0160548	0.678824	40.8	43.56	76.57	262.79	101.93	50.2	2	2	+	-	+	+	+	-	Teh1
chr3L	18361377	18361577	201	*	5.66898	6.21712	4.7741	0.102835	0.0160885	0.679268	108.28	79.09	35.82	7.43	33.19	41.47	0	2	-	-	-	-	+	+
chr2R	13545469	13545669	201	*	6.07548	5.46758	6.50186	-0.102988	0.0161261	0.679846	43.94	49.29	39.52	141.15	72.89	57.84	3	3	+	+	+	+	+	+	CG6145
chr2R	18690663	18690863	201	*	6.20805	5.52179	6.67119	-0.105222	0.0161486	0.679846	39.23	50.43	48.17	175.5	73.49	56.75	1	3	-	+	-	+	+	+	Sik3
chr4	1097711	1097911	201	*	7.11088	6.68146	7.44138	-0.085962	0.0162058	0.680427	111.42	77.94	118.56	219.15	158.23	144.05	2	2	+	-	+	+	+	-	sv
chr3L	3077906	3078106	201	*	6.19055	5.25987	6.75165	-0.101055	0.016209	0.680427	28.25	28.66	58.05	220.08	62.82	40.38	2	0	+	-	+	-	-	-	PAN3
chr2R	22797643	22797843	201	*	5.65001	5.09376	6.05047	-0.0997021	0.0162474	0.680593	40.8	33.24	28.41	91.93	54.52	52.38	1	2	-	-	+	+	+	-	blw
chr2L	15339657	15339857	201	*	6.56872	5.44429	7.19289	-0.0923969	0.0162594	0.680593	23.54	20.63	86.45	297.15	109.04	32.74	1	1	-	+	-	-	+	-
chr3R	9883626	9883826	201	*	5.90599	4.6883	6.55679	-0.0876639	0.0163001	0.681321	23.54	6.88	46.93	202.43	59.26	20.74	3	2	+	+	+	-	+	+	Glut4EF
chr2R	24369723	24369923	201	*	7.78384	7.02922	8.27677	-0.104631	0.0163432	0.682146	86.31	57.31	248.24	423.44	331.28	175.7	1	1	-	-	+	+	-	-	bs
chr2L	1036884	1037084	201	*	5.71271	6.16395	5.05248	0.103261	0.0164081	0.683871	98.86	45.85	70.4	19.5	46.23	33.83	2	3	+	-	+	+	+	+	IA-2
chr3L	5807845	5808045	201	*	5.93598	5.34917	6.35194	-0.0999914	0.016463	0.683871	32.95	58.46	30.88	104.93	60.45	79.67	3	2	+	+	+	-	+	+	kri
chr3R	22094061	22094261	201	*	6.50255	5.91336	6.9197	-0.100723	0.0165052	0.683871	75.32	41.26	64.22	180.15	106.67	76.39	3	3	+	+	+	+	+	+
chr2R	9605842	9606042	201	*	5.09497	3.93305	5.73011	-0.0897849	0.0165135	0.683871	10.98	12.61	22.23	119.79	29.63	9.82	2	3	+	-	+	+	+	+	GstT1
chr2R	18652906	18653106	201	*	7.94537	7.05728	8.49102	-0.101025	0.0165394	0.683871	98.86	72.21	228.48	683.44	293.35	102.58	3	3	+	+	+	+	+	+	Ntan1
chr2R	10566901	10567101	201	*	6.47018	5.94166	6.85615	-0.0958999	0.0165728	0.683871	62.77	56.17	65.46	170.86	88.3	88.4	3	3	+	+	+	+	+	+	psq
chr3L	5249171	5249371	201	*	4.994	4.24895	5.48288	-0.103672	0.016578	0.683871	9.42	22.92	24.7	58.5	52.74	22.92	3	3	+	+	+	+	+	+	shep
chr2L	4820773	4820973	201	*	7.41595	7.03816	7.71507	-0.0755572	0.0166225	0.683871	145.94	126.09	122.27	221.93	161.79	246.64	3	3	+	+	+	+	+	+	CG3225
chr2R	24944644	24944844	201	*	5.7179	4.76234	6.28774	-0.0984052	0.0166419	0.683871	14.12	24.07	43.23	147.65	61.63	25.1	1	2	-	-	+	-	+	+	Tina-1
chr3L	14133074	14133274	201	*	6.18829	5.61036	6.5998	-0.099357	0.0166649	0.683871	54.92	44.7	46.93	52	116.75	122.23	1	1	-	-	+	-	+	-	Sox21b
chr2L	14552491	14552691	201	*	5.93631	5.40004	6.32637	-0.0956957	0.0166944	0.683871	28.25	36.68	61.75	80.79	83.56	76.39	1	3	-	-	+	+	+	+	FBgn0266147
chr3L	18757275	18757475	201	*	6.51832	5.34929	7.15549	-0.0886775	0.0166949	0.683871	18.83	19.49	83.98	277.65	123.86	26.19	1	1	-	-	+	-	+	-	ftz-f1
chr3L	4189178	4189378	201	*	5.07055	4.53084	5.46242	-0.0960705	0.0167155	0.683871	20.4	21.78	27.17	52	42.08	38.2	2	3	+	-	+	+	+	+	tipE
chr3L	1755626	1755826	201	*	6.79149	5.76922	7.3838	-0.0952185	0.0167223	0.683871	29.82	42.41	91.39	333.36	132.75	34.92	3	3	+	+	+	+	+	+	Cht2
chr2L	15111342	15111542	201	*	6.42397	5.86132	6.82771	-0.0976653	0.0167928	0.683871	50.22	38.97	85.22	148.57	104.9	87.31	2	1	+	-	+	-	+	-	stc
chrX	6571342	6571542	201	*	6.47706	5.46405	7.06633	-0.0952581	0.0168119	0.683871	20.4	20.63	91.39	219.15	139.27	43.65	2	3	+	-	+	+	+	+	CG34417
chrX	2251727	2251927	201	*	6.32323	5.83328	6.68832	-0.0911354	0.0168233	0.683871	50.22	50.43	70.4	133.72	96.01	79.67	1	1	-	-	+	+	-	-	crn
chr3L	14004118	14004318	201	*	7.12148	6.54138	7.53408	-0.0986855	0.016834	0.683871	97.29	56.17	125.97	274.86	153.49	127.68	1	1	-	+	-	-	-	+	Nprl3
chr2R	10427879	10428079	201	*	6.72471	6.1305	7.14435	-0.0991855	0.0168517	0.683871	45.51	58.46	106.21	191.29	139.27	93.85	3	3	+	+	+	+	+	+	CG12896
chrX	16231390	16231590	201	*	6.53443	7.02144	5.79377	0.102383	0.0168777	0.683871	182.03	60.75	146.97	26	57.48	82.94	3	2	+	+	+	+	+	-
chr2L	9158422	9158622	201	*	6.44819	5.81176	6.88828	-0.100916	0.0169205	0.683871	70.62	43.56	54.34	192.22	96.6	66.57	1	2	-	-	+	+	+	-	CG32982
chr2R	15135354	15135554	201	*	6.4692	5.58565	7.01316	-0.0995618	0.0169388	0.683871	34.52	36.68	72.87	257.22	81.19	49.11	1	2	-	+	-	-	+	+	chn
chrX	3378651	3378851	201	*	6.63185	5.71919	7.18648	-0.0985494	0.016947	0.683871	53.35	51.58	53.11	317.58	53.93	65.48	0	3	-	-	-	+	+	+	Myc
chr3R	21163363	21163563	201	*	5.0401	4.17094	5.57867	-0.0999685	0.0169534	0.683871	17.26	19.49	17.29	93.79	26.67	22.92	3	3	+	+	+	+	+	+	cDIP
chr2L	4821633	4821833	201	*	6.96119	6.51319	7.30254	-0.0856456	0.0169921	0.683871	112.99	89.41	71.63	180.15	115.56	177.89	2	3	+	-	+	+	+	+	CG15628
chr3L	12056473	12056673	201	*	6.58149	5.97564	7.00687	-0.0994027	0.0170148	0.683871	72.19	41.26	75.34	187.57	126.23	72.03	1	2	-	-	+	+	+	-	rols
chrX	13301094	13301294	201	*	5.74157	4.68767	6.34406	-0.0929633	0.0170156	0.683871	10.98	20.63	45.7	170.86	37.93	34.92	3	3	+	+	+	+	+	+	CG1764
chr2L	6612742	6612942	201	*	6.33799	5.49231	6.86762	-0.10007	0.0170688	0.685024	29.82	28.66	76.57	205.22	96.01	49.11	0	2	-	-	-	-	+	+	CG11050
chrX	23066376	23066576	201	*	4.84884	5.35808	4.05471	0.101182	0.0171018	0.685024	67.48	16.05	39.52	13.93	19.56	16.37	1	2	-	-	+	+	+	-	CG17167
chr2L	3632149	3632349	201	*	7.9179	7.4317	8.2809	-0.0899477	0.0171263	0.685024	200.86	99.72	217.36	406.72	279.72	246.64	1	3	-	-	+	+	+	+	for
chr2L	10774131	10774331	201	*	6.19386	5.07511	6.81633	-0.089303	0.0171379	0.685024	32.95	28.66	39.52	268.36	46.82	22.92	0	2	-	-	-	+	-	+	CG31869
chr2R	22382947	22383147	201	*	7.27068	6.33443	7.83375	-0.096779	0.0171744	0.685546	62.77	44.7	134.62	425.29	205.64	53.47	0	2	-	-	-	+	+	-	CG13506
chr2R	19093138	19093338	201	*	5.18728	5.62639	4.55294	0.0989749	0.0172592	0.687276	73.75	27.51	46.93	20.43	24.89	25.1	3	3	+	+	+	+	+	+	FBgn0004168
chr3L	1208230	1208430	201	*	6.25035	5.4866	6.7471	-0.100639	0.0172647	0.687276	37.66	25.22	71.63	165.29	107.86	49.11	0	2	-	-	-	+	+	-	LysB
chr2L	18387826	18388026	201	*	5.08672	4.27071	5.60475	-0.0996107	0.0173585	0.69007	10.98	16.05	30.88	74.29	50.97	20.74	3	3	+	+	+	+	+	+	Fas3
chr3L	10234086	10234286	201	*	5.76438	6.24701	5.03394	0.100299	0.0173883	0.690317	87.88	42.41	97.57	13.93	38.52	45.84	1	3	+	-	-	+	+	+	FBgn0265735
chrX	12194964	12195164	201	*	4.83785	5.26439	4.2296	0.0968103	0.0174175	0.690539	42.37	30.95	41.99	13.93	24.89	17.46	3	3	+	+	+	+	+	+	Ten-a
chr3L	900660	900860	201	*	6.07744	6.45704	5.56085	0.0915539	0.0174598	0.69128	117.69	77.94	67.93	37.14	44.45	60.02	1	2	-	-	+	+	+	-	CG13905
chr3R	5523395	5523595	201	*	6.18132	5.32638	6.71449	-0.0981521	0.0174962	0.691785	31.38	47	41.99	206.15	72.89	36.01	2	3	-	+	+	+	+	+	Itpr
chr2R	8068193	8068393	201	*	6.86652	6.50729	7.1539	-0.0703279	0.01754	0.691821	95.72	88.26	88.92	152.29	150.53	124.41	1	1	-	+	-	+	-	-	lig
chr3R	18935201	18935401	201	*	4.96004	3.91619	5.55933	-0.0914909	0.0175444	0.691821	10.98	19.49	14.82	103.07	23.11	15.28	3	2	+	+	+	-	+	+	CG42613
chr2R	16278649	16278849	201	*	5.88934	5.41434	6.24608	-0.0866034	0.0175905	0.692704	40.8	38.97	48.17	63.14	72.89	91.67	1	1	-	-	+	+	-	-	cato
chr2L	469104	469304	201	*	5.51241	4.27208	6.16934	-0.0824748	0.0176522	0.692932	6.28	18.34	33.35	160.65	43.26	12	1	2	-	-	+	+	+	-	CG4297
chr2L	14013580	14013780	201	*	6.43721	5.92523	6.81432	-0.0905583	0.0176526	0.692932	67.48	64.19	50.64	160.65	91.86	85.12	2	3	+	-	+	+	+	+	bgm
chr3R	10190976	10191176	201	*	4.95072	3.9397	5.53934	-0.0925178	0.0176727	0.692932	7.85	17.19	21	96.57	25.48	17.46	1	1	-	+	-	-	-	+	Syn
chr2R	19811556	19811756	201	*	5.33197	5.71363	4.81154	0.0910272	0.017703	0.692932	67.48	50.43	39.52	31.57	24.3	28.37	2	3	+	+	-	+	+	+
chr3L	9127110	9127310	201	*	5.9608	5.16107	6.47231	-0.0983885	0.0177313	0.692932	29.82	35.53	41.99	169	58.08	39.29	3	3	+	+	+	+	+	+	bol
chr2R	11284297	11284497	201	*	5.43609	4.9338	5.80795	-0.0899921	0.0177383	0.692932	32.95	22.92	35.82	61.29	59.86	46.93	3	2	+	+	+	+	+	-	CG9062
chr3L	2711682	2711882	201	*	5.66511	4.68547	6.24322	-0.0931608	0.0178241	0.693694	12.55	42.41	22.23	152.29	30.22	44.74	1	2	-	-	+	+	+	-	Fife
chr3R	5021512	5021712	201	*	6.87399	6.47206	7.18799	-0.0764773	0.0178433	0.693694	108.28	80.24	77.81	143.93	123.27	170.25	3	3	+	+	+	+	+	+
chrX	13222236	13222436	201	*	5.61882	6.05954	4.9811	0.0969849	0.0178628	0.693694	100.43	52.73	46.93	19.5	33.78	41.47	1	1	-	-	+	+	-	-	mew
chr4	807909	808109	201	*	7.37154	6.49798	7.91176	-0.0961186	0.0178782	0.693694	59.63	43.56	167.96	399.29	242.39	80.76	1	1	-	-	+	-	+	-	Sox102F
chr3L	96903	97103	201	*	4.79009	5.18661	4.24147	0.0931825	0.017921	0.693694	39.23	36.68	33.35	22.29	14.82	19.64	3	2	+	+	+	-	+	+
chr2L	18184676	18184876	201	*	6.37997	5.1931	7.02221	-0.083645	0.0179441	0.693694	20.4	26.36	62.99	294.36	77.04	18.55	0	2	-	-	-	+	+	-	CG42750
chrX	4139148	4139348	201	*	5.94069	6.38851	5.28783	0.0970779	0.0179471	0.693694	138.09	52.73	60.52	28.79	41.48	46.93	1	2	-	-	+	+	+	-	Fas2
chr3L	14336830	14337030	201	*	4.4169	3.60174	4.93458	-0.0974438	0.0179475	0.693694	7.85	13.75	14.82	46.43	27.85	17.46	0	2	-	-	-	+	+	-	fz
chrX	3396690	3396890	201	*	6.30524	6.72425	5.7123	0.0950121	0.0180131	0.694587	155.36	79.09	82.75	46.43	35.56	75.3	2	2	+	-	+	-	+	+	CG12535
chr2L	12364396	12364596	201	*	5.5001	5.86351	5.01318	0.0866628	0.0180181	0.694587	72.19	48.14	54.34	30.64	30.22	36.01	1	2	-	-	+	+	+	-	bru2
chr3R	16987655	16987855	201	*	6.69861	5.63249	7.30496	-0.0884951	0.018058	0.695001	34.52	55.02	59.28	375.15	61.04	38.2	3	3	+	+	+	+	+	+	CG18622
chr3R	23669983	23670183	201	*	6.22734	5.35329	6.76775	-0.0953862	0.0180763	0.695001	34.52	26.36	61.75	214.5	68.74	43.65	2	3	+	-	+	+	+	+	CG31145
chr2L	19643681	19643881	201	*	5.62572	6.0265	5.06886	0.0914422	0.0182361	0.697395	95.72	50.43	49.4	29.71	34.97	36.01	2	3	+	-	+	+	+	+	Lar
chr2R	23910279	23910479	201	*	6.36972	5.44088	6.93015	-0.0931426	0.0182509	0.697395	26.68	33.24	70.4	251.65	64	50.2	1	1	-	-	+	+	-	-	Nap1
chr3L	18191799	18191999	201	*	4.70963	3.86126	5.24029	-0.0953576	0.0183048	0.697395	12.55	13.75	17.29	69.64	21.93	21.83	3	2	+	+	+	-	+	+
chr3L	7835238	7835438	201	*	6.13291	4.91913	6.78262	-0.0814533	0.0183053	0.697395	14.12	30.95	45.7	261.86	50.97	17.46	1	1	-	-	+	+	-	-	Pdp1
chrX	5560537	5560737	201	*	8.58176	8.04817	8.97041	-0.0900836	0.0183349	0.697395	332.68	118.06	343.33	616.58	446.25	441.99	3	3	+	+	+	+	+	+	Vsx2
chrX	19290828	19291028	201	*	4.65668	5.09329	4.02759	0.0944144	0.0183529	0.697395	43.94	26.36	32.11	13	19.56	16.37	2	3	-	+	+	+	+	+	CG8034
chr3L	15392329	15392529	201	*	4.61993	4.02177	5.04152	-0.0944651	0.0183597	0.697395	18.83	12.61	17.29	32.5	37.93	28.37	3	3	+	+	+	+	+	+
chr2R	22099353	22099553	201	*	5.54291	4.7409	6.05534	-0.0960143	0.0183615	0.697395	18.83	20.63	40.76	118.86	46.82	33.83	1	1	+	-	-	-	+	-	CG11073
chr3R	13214526	13214726	201	*	6.06333	5.45306	6.49085	-0.0940667	0.018393	0.697395	29.82	43.56	58.05	130	84.15	55.66	3	3	+	+	+	+	+	+	CG8483
chr3R	17056378	17056578	201	*	8.02019	7.55233	8.37292	-0.0836296	0.0184169	0.697395	207.14	123.79	232.18	458.72	295.72	240.09	1	3	+	-	-	+	+	+	Dad
chr3L	27153461	27153661	201	*	5.84159	6.2211	5.32516	0.0879252	0.0184183	0.697395	78.46	84.82	60.52	26.93	48.6	44.74	1	2	-	-	+	+	+	-	vtd
chrX	11640593	11640793	201	*	5.64752	5.14011	6.02216	-0.0868951	0.0184377	0.697395	26.68	30.95	48.17	62.22	64	68.75	0	2	-	-	-	-	+	+	Ptp10D
chr3R	5517084	5517284	201	*	7.20698	6.8465	7.49516	-0.0684038	0.0184669	0.697395	139.66	104.31	101.27	202.43	178.38	160.42	3	3	+	+	+	+	+	+	Itpr
chr3L	16388277	16388477	201	*	6.59374	5.91858	7.05185	-0.0956992	0.0184767	0.697395	48.65	71.07	61.75	229.36	104.3	64.39	3	3	+	+	+	+	+	+	Agpat3
chrX	12699525	12699725	201	*	6.9083	7.28272	6.40131	0.0871005	0.0184961	0.697395	194.59	84.82	187.72	86.36	78.82	88.4	3	3	+	+	+	+	+	+	Smr
chr2L	19438788	19438988	201	*	5.80528	4.79084	6.39502	-0.0890432	0.0185225	0.697491	18.83	16.05	48.17	175.5	48.6	28.37	2	2	-	+	+	+	+	-	RanGAP
chrX	9078385	9078585	201	*	5.97853	4.89971	6.58884	-0.0861757	0.0185885	0.698535	20.4	16.05	53.11	200.57	66.37	21.83	2	2	+	+	-	-	+	+	HP1b
chr2L	298309	298509	201	*	6.66921	5.81008	7.20399	-0.0937737	0.0186383	0.698535	42.37	48.14	77.81	289.72	107.86	44.74	2	2	+	-	+	+	+	-	Pi3K21B
chr2L	16543348	16543548	201	*	4.28976	3.03707	4.94999	-0.0784728	0.0186504	0.698535	6.28	2.29	16.06	56.64	28.45	7.64	3	3	+	+	+	+	+	+	CG31816
chr2L	8266014	8266214	201	*	4.94341	4.11862	5.4649	-0.0945344	0.0186697	0.698535	15.69	24.07	12.35	79.86	30.82	21.83	3	2	+	+	+	-	+	+	Btk29A
chr2L	11971128	11971328	201	*	8.02878	7.69043	8.30265	-0.0631876	0.0186879	0.698535	218.12	173.08	228.48	381.65	265.5	300.11	2	3	+	-	+	+	+	+	FBgn0263019
chr2L	4852733	4852933	201	*	6.52774	5.97104	6.92843	-0.0903293	0.0187157	0.698535	62.77	55.02	70.4	189.43	93.04	82.94	0	2	-	-	-	+	+	-	mRpS2
chr2L	11155691	11155891	201	*	5.07128	4.33471	5.55654	-0.095267	0.0187174	0.698535	20.4	8.02	32.11	65	45.63	30.56	3	3	+	+	+	+	+	+	CG6287
chr3L	9837236	9837436	201	*	5.6868	5.14381	6.08039	-0.0887748	0.0187763	0.69902	32.95	44.7	28.41	89.14	52.74	61.11	3	2	+	+	+	-	+	+	Cdk8
chr3R	32041250	32041450	201	*	4.98828	5.40352	4.40292	0.0918708	0.0187806	0.69902	47.08	36.68	43.23	12.07	21.93	29.47	1	2	-	-	+	+	+	-
chrX	20468274	20468474	201	*	6.06874	4.95565	6.68952	-0.0839729	0.0188256	0.69902	26.68	19.49	46.93	240.5	46.23	22.92	3	3	+	+	+	+	+	+	GstT3
chr3R	25304009	25304209	201	*	5.54818	4.21332	6.22947	-0.0746269	0.0188579	0.69902	15.69	10.32	29.64	186.65	30.82	7.64	1	1	-	-	+	+	-	-	CG31436
chr2L	2451038	2451238	201	*	7.8027	7.25235	8.20012	-0.0894235	0.0188909	0.69902	158.49	111.19	187.72	458.72	263.13	160.42	1	1	-	+	-	+	-	-	dpp
chr2R	4268935	4269135	201	*	4.81458	5.25952	4.16791	0.0929111	0.0189081	0.69902	45.51	28.66	40.76	12.07	25.48	16.37	3	3	+	+	+	+	+	+
chr3R	24320474	24320674	201	*	7.1279	6.63369	7.49533	-0.0849152	0.018927	0.69902	109.85	59.6	128.44	231.22	167.12	142.96	0	2	-	-	-	+	+	-	BRWD3
chr2R	5726877	5727077	201	*	8.55916	7.97331	8.97464	-0.0912008	0.0189713	0.69902	288.74	132.96	332.22	789.3	408.91	311.03	2	3	-	+	+	+	+	+	ap
chr3R	11156899	11157099	201	*	6.98839	6.2594	7.47039	-0.0943795	0.0189779	0.69902	70.62	49.29	109.92	316.65	135.71	79.67	1	2	-	-	+	+	+	-	Ugt302C1
chrX	20426633	20427140	508	*	6.79528	7.10756	6.39617	0.0722188	0.0189806	0.69902	166.34	122.65	124.74	69.64	92.45	90.58	3	3	+	+	+	+	+	+	mal
chrX	1524768	1524968	201	*	5.11624	5.50889	4.57505	0.0888445	0.0189932	0.69902	39.23	34.39	62.99	25.07	21.33	25.1	1	1	-	+	-	-	+	-	Mur2B
chr2R	7814883	7815083	201	*	5.7336	4.62946	6.35167	-0.083448	0.0191043	0.701804	23.54	14.9	35.82	186.65	40.89	17.46	3	3	+	+	+	+	+	+	TTLL12
chr2R	10313743	10313943	201	*	6.25181	5.51228	6.73833	-0.0938932	0.0191168	0.701804	34.52	33.24	69.16	187.57	70.52	62.21	1	1	-	-	+	+	-	-	Ndg
chr2L	22153397	22153597	201	*	5.65945	4.69083	6.23379	-0.0886398	0.0191972	0.703872	18.83	24.07	34.58	162.5	27.26	36.01	1	1	-	-	+	+	-	-	CG42748
chr2R	11629700	11629900	201	*	6.86342	6.16703	7.3311	-0.0931098	0.0193058	0.704537	59.63	59.6	96.33	291.58	109.64	81.85	2	2	+	+	-	+	+	-	CG9005
chr4	156039	156239	201	*	5.4944	4.37733	6.11637	-0.0823564	0.0193442	0.704537	15.69	19.49	27.17	158.79	37.34	12	3	3	+	+	+	+	+	+	CG31997
chrX	13177877	13178077	201	*	5.34866	5.76154	4.76801	0.0891556	0.0193535	0.704537	73.75	30.95	58.05	28.79	27.85	25.1	1	1	-	+	-	+	-	-	CG32640
chr2L	8334843	8335043	201	*	4.90246	4.27798	5.33685	-0.0916286	0.0193932	0.704537	23.54	14.9	19.76	58.5	34.37	28.37	3	3	+	+	+	+	+	+
chr3L	16393809	16394009	201	*	5.82406	5.04134	6.32866	-0.0926645	0.0194012	0.704537	21.97	28.66	48.17	145.79	46.23	49.11	3	3	+	+	+	+	+	+	Gagr
chr3R	30134584	30134784	201	*	4.45534	3.15594	5.12772	-0.0747788	0.0194098	0.704537	6.28	6.88	13.59	78	22.52	4.37	3	3	+	+	+	+	+	+	CG31029
chr2L	1048999	1049199	201	*	5.89679	5.08964	6.41128	-0.0920626	0.0194924	0.704537	20.4	44.7	37.05	159.72	49.78	45.84	3	3	+	+	+	+	+	+	IA-2
chrX	7044825	7045025	201	*	5.13815	5.52136	4.61482	0.0856007	0.0194958	0.704537	58.06	38.97	40.76	20.43	22.52	30.56	3	3	+	+	+	+	+	+	CG12541
chr2R	12259236	12259436	201	*	6.83412	6.07939	7.3271	-0.0924525	0.019522	0.704537	67.48	53.87	81.51	308.29	109.04	64.39	1	1	-	-	+	-	+	-	Cam
chr3R	31683211	31683411	201	*	5.45123	5.83838	4.92046	0.0850081	0.0195306	0.704537	73.75	43.56	54.34	24.14	36.15	30.56	1	1	-	+	-	-	-	+	FBgn0264900
chr3L	20229384	20229584	201	*	5.36139	5.76093	4.80692	0.0876228	0.0196179	0.704537	40.8	68.77	53.11	17.64	31.41	34.92	3	2	+	+	+	+	+	-	CG13813
chr3L	6333322	6333522	201	*	5.3856	5.80901	4.78376	0.0893425	0.019641	0.704537	83.17	34.39	50.64	21.36	29.63	31.65	3	3	+	+	+	+	+	+	CG13300
chr2R	6050809	6051009	201	*	5.54267	4.52572	6.13323	-0.0856502	0.019644	0.704537	10.98	30.95	27.17	152.29	33.19	25.1	1	1	+	-	-	-	+	-	CCHa2-R
chr2R	6871569	6871769	201	*	6.30804	5.59864	6.7815	-0.09206	0.019655	0.704537	43.94	29.8	71.63	180.15	94.23	55.66	3	2	+	+	+	-	+	+	FBgn0265058
chr3R	21204725	21204925	201	*	6.22594	5.29029	6.7888	-0.0881733	0.019657	0.704537	29.82	33.24	54.34	231.22	69.93	30.56	1	1	-	-	+	-	+	-	SNF4Agamma
chr2L	1048074	1048274	201	*	6.37783	5.33007	6.97837	-0.0841341	0.0196699	0.704537	28.25	34.39	58.05	294.36	46.82	37.1	3	3	+	+	+	+	+	+	IA-2
chr2R	7035058	7035258	201	*	5.10415	4.10307	5.68948	-0.0860538	0.0196789	0.704537	10.98	18.34	22.23	110.5	29.04	15.28	3	3	+	+	+	+	+	+	Tsp42Ei
chr3L	13717377	13717577	201	*	5.27911	5.6998	4.68278	0.0891394	0.0196792	0.704537	75.32	43.56	37.05	17.64	26.67	32.74	3	3	+	+	+	+	+	+	bru3
chr3L	1970013	1970213	201	*	5.17787	4.00145	5.81715	-0.0790785	0.0196986	0.704537	9.42	11.46	27.17	133.72	20.15	15.28	3	3	+	+	+	+	+	+	CG1927
chr3L	16896497	16896697	201	*	5.36431	4.33894	5.95763	-0.0848897	0.0197235	0.704537	12.55	16.05	32.11	127.22	45.04	14.19	1	2	-	-	+	+	+	-	Lmpt
chr2R	9565889	9566089	201	*	6.35885	5.3416	6.94952	-0.0849357	0.0197592	0.704537	36.09	27.51	58.05	274.86	67.56	28.37	3	3	+	+	+	+	+	+	FBgn0266819
chr3L	17977938	17978138	201	*	5.15069	4.58243	5.5573	-0.0875648	0.0197607	0.704537	15.69	24.07	32.11	42.72	59.26	39.29	1	2	-	-	+	+	+	-	Eip75B
chr3L	27863492	27863692	201	*	4.84464	5.24859	4.2816	0.0882752	0.0197691	0.704537	36.09	45.85	32.11	25.07	13.63	19.64	3	3	+	+	+	+	+	+
chr3L	25209908	25210108	201	*	5.61807	6.00147	5.09438	0.0837996	0.019832	0.705916	73.75	65.34	53.11	23.21	43.26	36.01	2	1	+	-	+	-	+	-
chrX	20633650	20633850	201	*	5.0419	5.44539	4.47977	0.0868925	0.0198573	0.705959	51.79	33.24	45.7	14.86	23.71	28.37	3	2	+	+	+	-	+	+
chr3L	22134651	22134851	201	*	7.40008	7.00937	7.70721	-0.0694316	0.0199415	0.707251	127.11	95.14	164.26	232.15	216.9	177.89	1	1	-	+	-	-	+	-	olf413
chr2L	4045297	4045497	201	*	5.88929	5.3512	6.28031	-0.0852152	0.0199487	0.707251	34.52	28.66	59.28	62.22	84.75	86.21	1	2	-	+	-	-	+	+	ed
chr3L	16001222	16001422	201	*	5.34203	4.38456	5.91253	-0.0865641	0.0199661	0.707251	18.83	24.07	19.76	130.93	29.04	20.74	1	2	-	-	+	+	+	-	hzg
chr3R	17556329	17556529	201	*	6.20378	6.68116	5.48542	0.090897	0.020026	0.707445	139.66	60.75	107.45	17.64	48	68.75	3	3	+	+	+	+	+	+	Hmx
chr2R	9440987	9441187	201	*	5.61268	5.06592	6.00823	-0.0864759	0.0200396	0.707445	50.22	20.63	29.64	75.22	62.23	55.66	1	2	-	-	+	+	+	-	ced-6
[truncated: 28,441 more rows]
