# Supplementary material for: CLAMP and Zelda function together to promote Drosophila zygotic genome activation
Source: eLife journal article supplement (doi:10.7554/elife.69937), 2021-08-03

Fig.3- Figure supplement 3

**ZLD 0-2hr *clamp-i* vs MTD down-DB  
(n=274)**

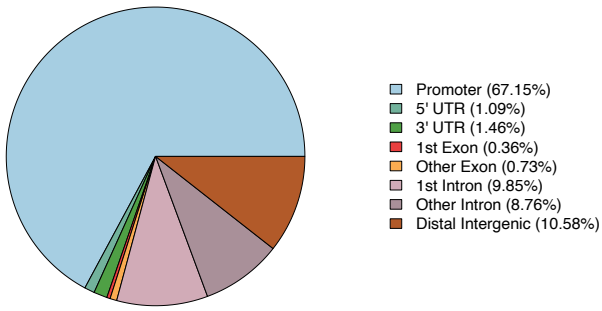

**ZLD 0-2hr *clamp-i* vs MTD up-DB  
(n=8)**

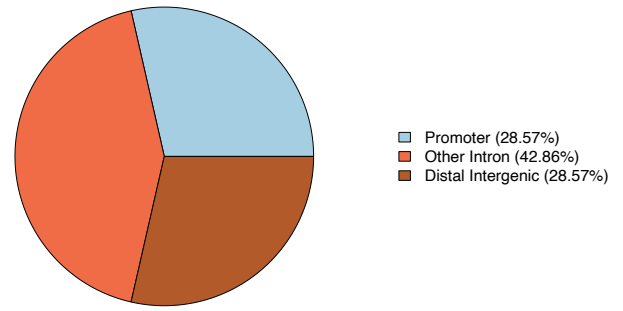

**ZLD 2-4hr *clamp-i* vs MTD down-DB  
(n=1,289)**

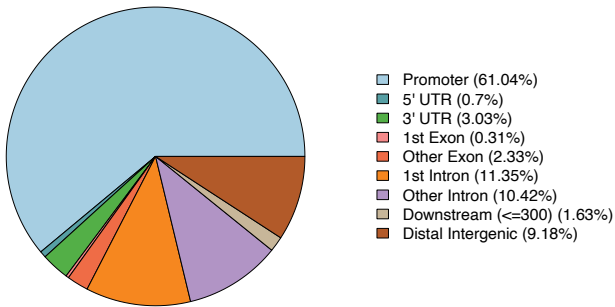

**ZLD 2-4hr *clamp-i* vs MTD up-DB  
(n=223)**

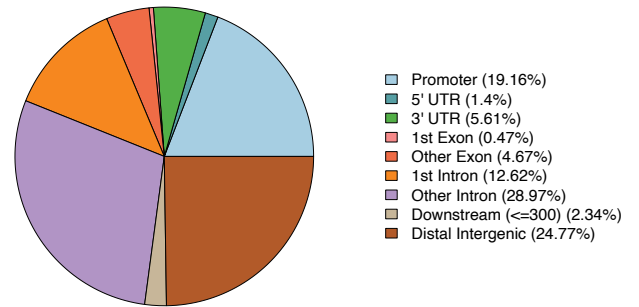

**CLAMP 0-2hr *zld-i* vs MTD down-DB  
(n=390)**

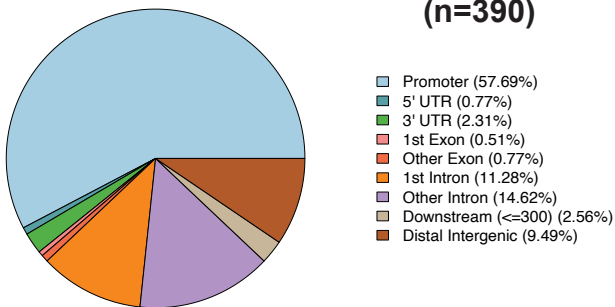

**CLAMP 0-2hr *zld-i* vs MTD up-DB  
(n=54)**

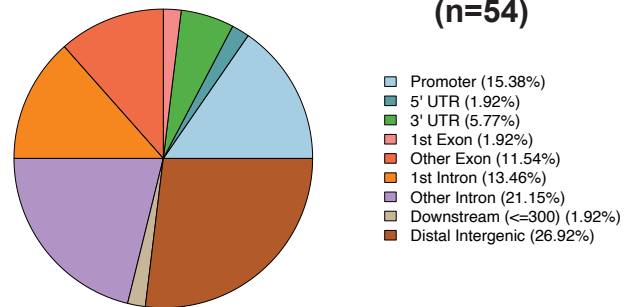

**CLAMP 2-4hr *zld-i* vs MTD down-DB  
(n=30)**

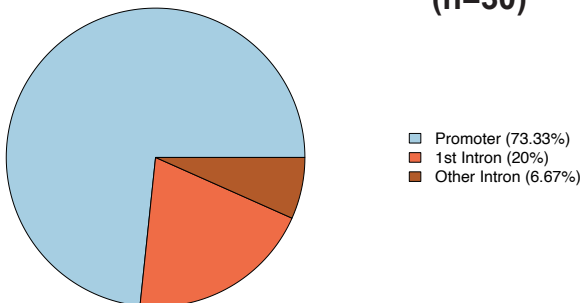

**CLAMP 2-4hr *zld-i* vs MTD up-DB  
(n=3)**

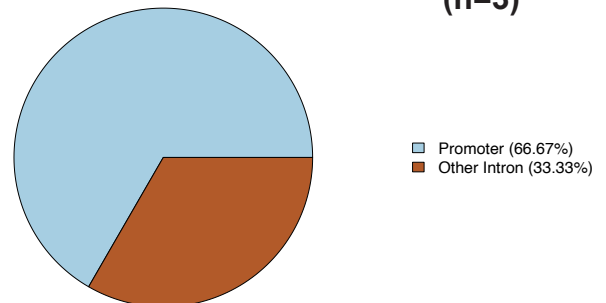

Supplement: supp [file elife-69937-supp-v1.zip › elife_poa_e69937_Figure_3_figure_supplement_3.pdf]
