# Supplementary material for: CLAMP and Zelda function together to promote Drosophila zygotic genome activation
Source: eLife journal article supplement (doi:10.7554/elife.69937), 2021-08-03
Supplement: supp [file elife-69937-supp-v1.zip › elife_poa_e69937_Table_1_source_data_1.xlsx]

## Sheet: ZLD in MTD vs clampi 0-2hr
seqnames	start	end	width	strand	Conc	Conc_CLAMPi	Conc_MTD	Fold	p.value	FDR	Called1	Called2	CLRNAi_0.2hr_1	CLRNAi_0.2hr_2	CLRNAi_0.2hr_3	MTD_0.2hr_1	MTD_0.2hr_2	MTD_0.2hr_3	CLRNAi_0.2hr_1.1	CLRNAi_0.2hr_2.1	CLRNAi_0.2hr_3.1	MTD_0.2hr_1.1	MTD_0.2hr_2.1	MTD_0.2hr_3.1	anno_MTD_CLAMPi1_all_gene
chr3L	12692827	12693327	501	*	4.84	-0.13	5.82	-5.95	8.19e-13	8.05e-10	0	2	0.7	1.25	0.81	48.73	60.73	60	-	-	-	+	+	-	mirr
chr3R	12280768	12281268	501	*	4.81	0.92	5.76	-4.85	1.31e-12	8.05e-10	0	3	2.79	2.08	0.81	51.66	61.38	50	-	-	-	+	+	+	svp
chr2R	25258187	25258687	501	*	6.18	3.52	7.07	-3.54	1.48e-12	8.05e-10	2	3	11.15	11.22	12.1	113.06	138.83	150	-	+	+	+	+	+	CG9380
chrX	17768027	17768527	501	*	4.63	0.73	5.58	-4.85	1.45e-10	5.93e-08	0	2	2.09	2.08	0.81	45.81	71.45	26	-	-	-	+	+	-	unc-4
chr3R	16715499	16715999	501	*	4.95	2.04	5.85	-3.82	1.84e-10	6.01e-08	0	3	2.09	4.57	5.65	60.43	41.08	72	-	-	-	+	+	+	Ubx
chr3R	29556022	29556522	501	*	4.84	1.7	5.75	-4.05	5.26e-10	1.24e-07	0	3	0.7	5.82	3.23	60.43	54.23	47	-	-	-	+	+	+	Dr
chr3L	14131561	14132061	501	*	4.38	-0.14	5.35	-5.49	5.98e-10	1.24e-07	0	2	0.7	0.42	1.61	36.06	36.05	50	-	-	-	+	+	-	Sox21b
chr3R	8190800	8191300	501	*	5.11	2.26	6.01	-3.75	6.08e-10	1.24e-07	0	3	2.09	5.82	6.45	38.99	63.16	91	-	-	-	+	+	+
chr2L	5461112	5461612	501	*	5.27	2.84	6.13	-3.28	5.3e-09	9.62e-07	0	3	4.88	3.74	12.91	72.13	78.59	59	-	-	-	+	+	+	mid
chr3R	16763974	16764474	501	*	5.72	3.52	6.55	-3.03	8.06e-09	1.21e-06	0	3	7.67	8.31	18.55	86.75	91.74	103	-	-	-	+	+	+	FBgn0020556
chr2R	11529390	11529890	501	*	4.86	2.1	5.75	-3.65	8.17e-09	1.21e-06	0	3	0.7	3.33	8.87	54.58	49.36	58	-	-	-	+	+	+	en
chrX	8410074	8410574	501	*	4.29	1	5.21	-4.21	1.26e-08	1.71e-06	0	2	0.7	2.08	3.23	38.01	29.39	44	-	-	-	+	+	-	PIG-T
chr2L	1972638	1973138	501	*	4.8	2.11	5.68	-3.57	1.39e-08	1.75e-06	0	3	0.7	5.82	6.45	42.89	53.1	58	-	-	-	+	+	+	erm
chr2L	160666	161166	501	*	4.35	1.13	5.27	-4.14	1.82e-08	2.13e-06	0	3	2.09	1.25	3.23	21.44	39.13	55	-	-	-	+	+	+	spen
chr2R	8018751	8019251	501	*	4.96	2.36	5.84	-3.48	2.66e-08	2.9e-06	0	2	0.7	6.65	8.07	71.15	51.64	49	-	-	-	+	+	-	FBgn0266805
chr3R	31748147	31748647	501	*	4.57	2.16	5.43	-3.27	3.17e-08	3.07e-06	0	3	2.79	4.16	6.45	42.89	43.52	43	-	-	-	+	+	+	awd
chr3L	9019177	9019677	501	*	5.14	2.97	5.97	-3	3.19e-08	3.07e-06	0	3	10.45	4.16	8.87	49.71	61.86	76	-	-	-	+	+	+	Doc2
chr3R	6791410	6791910	501	*	5.07	2.64	5.93	-3.28	3.76e-08	3.41e-06	0	2	5.58	8.31	4.84	36.06	98.24	48	-	-	-	-	+	+	Dfd
chrX	8650648	8651148	501	*	5.46	3.49	6.26	-2.77	4.37e-08	3.76e-06	0	3	13.24	6.65	13.71	78.95	75.67	75	-	-	-	+	+	+	oc
chr3R	16899661	16900161	501	*	4.48	1.44	5.39	-3.95	5.45e-08	4.43e-06	0	2	2.79	4.57	0.81	22.42	60.73	43	-	-	-	+	+	-	FBgn0264857
chr2L	21237638	21238138	501	*	4.23	0.93	5.16	-4.22	5.96e-08	4.43e-06	0	2	2.09	0.42	3.23	34.11	24.84	48	-	-	-	-	+	+	CG31626
chr3R	4835227	4835727	501	*	4.19	0.78	5.12	-4.34	5.97e-08	4.43e-06	0	2	0.7	0.42	4.03	30.22	35.24	39	-	-	-	-	+	+
chr2L	19154918	19155418	501	*	4.43	1.93	5.29	-3.36	7.22e-08	5.13e-06	0	2	4.88	3.33	3.23	46.78	34.91	36	-	-	-	+	+	-	brat
chr3L	12609249	12609749	501	*	5.25	2.98	6.09	-3.1	7.88e-08	5.36e-06	0	2	6.27	4.57	12.91	71.15	94.18	39	-	-	-	+	+	-	caup
chr3R	23279020	23279520	501	*	4.45	1.95	5.32	-3.37	8.64e-08	5.64e-06	0	2	6.27	2.91	2.42	40.94	40.76	38	-	-	-	+	+	-	orb
chrX	9693749	9694249	501	*	4.68	2.47	5.52	-3.05	1.04e-07	6.54e-06	0	3	3.48	6.65	6.45	36.06	51.64	50	-	-	-	+	+	+	btd
chr2L	7306729	7307229	501	*	5.36	3.35	6.16	-2.82	1.18e-07	7.16e-06	0	3	5.58	10.39	14.52	83.82	54.4	77	-	-	-	+	+	+	wg
chr3R	16869278	16869778	501	*	5.05	2.89	5.88	-2.99	1.29e-07	7.5e-06	0	2	9.06	9.98	3.23	43.86	73.07	60	-	-	-	+	+	-	FBgn0264857
chrX	7225950	7226450	501	*	4.83	2.8	5.64	-2.84	1.34e-07	7.55e-06	0	3	6.27	4.99	9.68	47.76	56.83	45	-	-	-	+	+	+	CG9650
chr3L	27083714	27084214	501	*	4.53	1.5	5.43	-3.93	1.94e-07	1.06e-05	0	2	0.7	4.57	3.23	16.57	71.12	42	-	-	-	-	+	+	CG40228
chrX	12735882	12736382	501	*	4.54	2.1	5.41	-3.31	2.04e-07	1.08e-05	0	3	6.27	4.16	2.42	32.16	32.96	62	-	-	-	+	+	+	Smr
chrX	4411347	4411847	501	*	4.94	2.84	5.76	-2.92	2.25e-07	1.15e-05	0	2	3.48	9.14	8.87	40.94	68.52	53	-	-	-	+	+	-	bi
chrX	17789460	17789960	501	*	4.14	0.78	5.07	-4.29	2.95e-07	1.46e-05	0	2	0.7	0.42	4.03	18.52	38.97	43	-	-	-	-	+	+	OdsH
chr3L	10856514	10857014	501	*	4.97	2.48	5.83	-3.35	3.12e-07	1.5e-05	1	3	6.27	0.83	9.68	58.48	38.48	74	+	-	-	+	+	+	tna
chr2R	19275240	19275740	501	*	4.99	2.88	5.81	-2.93	3.28e-07	1.53e-05	0	2	2.79	10.39	8.87	43.86	59.43	65	-	-	-	+	+	-	rib
chr3R	7000735	7001235	501	*	5.28	3.48	6.06	-2.57	3.54e-07	1.55e-05	0	2	9.06	9.14	15.33	52.63	74.86	72	-	-	-	+	+	-	Antp
chr4	660432	660932	501	*	4.3	1.79	5.17	-3.38	3.54e-07	1.55e-05	0	2	4.18	3.74	2.42	28.27	46.6	33	-	-	-	-	+	+	Slip1
chr2R	4618704	4619204	501	*	4.74	2.45	5.59	-3.14	3.6e-07	1.55e-05	0	2	4.88	6.65	4.84	27.29	79.08	38	-	-	-	-	+	+	CG17486
chrX	16148971	16149471	501	*	4.59	2.27	5.44	-3.17	4.16e-07	1.74e-05	0	3	1.39	5.82	7.26	39.96	37.02	53	-	-	-	+	+	+	disco-r
chr3L	377944	378444	501	*	5.16	2.87	6.01	-3.14	6.9e-07	2.82e-05	0	2	0.7	9.14	12.1	68.23	71.61	53	-	-	-	+	+	-	trh
chrX	18930044	18930544	501	*	4.86	3.04	5.65	-2.61	1.02e-06	4.06e-05	0	3	9.06	7.48	8.07	44.84	67.39	38	-	-	-	+	+	+	CG43759
chr2R	4187940	4188440	501	*	4.76	2.76	5.57	-2.81	1.33e-06	5.1e-05	0	2	10.45	5.82	4.03	33.14	65.44	44	-	-	-	-	+	+	RNASEK
chr3R	8181387	8181887	501	*	5.64	4	6.39	-2.39	1.34e-06	5.1e-05	0	3	10.45	16.63	20.97	75.05	88.98	88	-	-	-	+	+	+	grn
chr2L	22536505	22537005	501	*	5.13	3	5.95	-2.95	1.57e-06	5.81e-05	0	3	15.33	6.23	2.42	41.91	85.9	58	-	-	-	+	+	+	CG17490
chr2R	17822352	17822852	501	*	5.18	3.55	5.92	-2.37	1.61e-06	5.85e-05	0	3	10.45	13.3	11.29	49.71	67.06	65	-	-	-	+	+	+	grh
chr2R	12980566	12981066	501	*	5.73	4	6.49	-2.5	2.12e-06	7.53e-05	0	3	10.45	10.81	26.62	95.52	83.62	91	-	-	-	+	+	+	Psc
chrX	4423729	4424229	501	*	4.13	1.15	5.03	-3.88	2.33e-06	8.01e-05	0	2	1.39	0.42	4.84	51.66	19.49	27	-	-	-	+	+	-	bi
chrX	9497091	9497591	501	*	4.79	2.84	5.59	-2.75	2.35e-06	8.01e-05	0	3	4.88	3.74	12.91	51.66	38.81	54	-	-	-	+	+	+	mgl
chr4	866853	867353	501	*	4.92	2.74	5.75	-3.01	2.46e-06	8.21e-05	0	2	2.09	4.99	12.91	30.22	82.16	49	-	-	-	-	+	+	Gyf
chr3R	7037262	7037762	501	*	4.91	2.93	5.72	-2.79	2.86e-06	9.34e-05	0	2	4.18	4.16	14.52	38.01	70.96	49	-	-	-	-	+	+	FBgn0266238
chrX	19772108	19772608	501	*	3.53	-0.64	4.49	-5.13	3.04e-06	9.73e-05	0	2	0.7	0.42	0.81	32.16	16.08	19	-	-	-	+	+	-	zld
chrX	4426744	4427244	501	*	5.17	3.29	5.96	-2.67	3.78e-06	0.000119	0	2	11.15	2.91	15.33	53.61	67.55	66	-	-	-	-	+	+	bi
chr3L	28012407	28012907	501	*	4.13	1.25	5.03	-3.78	3.97e-06	0.000122	0	2	3.48	0.42	3.23	12.67	50.5	35	-	-	-	-	+	+	CG17514
chr3L	14002685	14003185	501	*	4.65	2.7	5.45	-2.75	4.03e-06	0.000122	0	3	2.79	7.9	8.87	58.48	38	35	-	-	-	+	+	+	Nprl3
chr3L	19895487	19895987	501	*	4.06	1.46	4.94	-3.48	4.72e-06	0.00014	0	2	2.09	4.57	1.61	28.27	23.87	40	-	-	-	+	+	-	Su(Tpl)
chrX	7096889	7097389	501	*	3.88	0.77	4.8	-4.03	5.47e-06	0.000159	0	2	1.39	2.91	0.81	16.57	19.81	47	-	-	-	-	+	+	Sxl
chr3R	15973503	15974003	501	*	4.71	2.99	5.48	-2.49	6.08e-06	0.000174	0	3	9.06	7.48	7.26	55.56	49.2	29	-	-	-	+	+	+	mor
chr3R	16241182	16241682	501	*	5.08	3.34	5.85	-2.5	6.61e-06	0.000186	0	2	7.67	6.65	16.13	78.95	38.81	55	-	-	-	-	+	+	tara
chr3R	3846486	3846986	501	*	3.54	-0.14	4.48	-4.62	6.72e-06	0.000186	0	2	0.7	0.42	1.61	9.75	24.19	33	-	-	-	-	+	+	CG41099
chr3L	13113951	13114451	501	*	5.03	3.47	5.76	-2.29	7.11e-06	0.000192	0	3	8.36	8.73	16.13	59.46	52.45	51	-	-	-	+	+	+	trn
chr3R	29772515	29773015	501	*	3.95	0.99	4.85	-3.86	7.22e-06	0.000192	0	2	0.7	0.42	4.84	42.89	21.6	22	-	-	-	+	+	-	kay
chr2L	20770318	20770818	501	*	5.86	4.29	6.59	-2.3	7.28e-06	0.000192	0	3	11.85	20.37	26.62	75.05	118.37	96	-	-	-	+	+	+	cad
chr3R	16886416	16886916	501	*	4.7	2.67	5.51	-2.84	7.41e-06	0.000192	0	3	9.76	1.25	8.07	53.61	42.38	41	-	-	-	+	+	+	FBgn0264857
chr4	958201	958701	501	*	4.81	2.8	5.62	-2.81	8.09e-06	0.000206	0	2	3.48	4.57	12.91	26.32	77.94	43	-	-	-	-	+	+	4E-T
chrX	11714430	11714930	501	*	4.32	1.96	5.17	-3.21	8.44e-06	0.000212	0	2	0.7	2.91	8.07	50.68	29.23	28	-	-	-	+	+	-	Amun
chr2R	8657706	8658206	501	*	4.53	2.63	5.33	-2.7	8.74e-06	0.000216	0	2	3.48	4.57	10.49	40.94	29.55	50	-	-	-	-	+	+	ptc
chr2R	4012555	4013055	501	*	4.04	1.66	4.9	-3.24	9.27e-06	0.000226	0	2	2.09	3.33	4.03	17.54	39.78	32	-	-	-	-	+	+	Haspin
chr2L	5403536	5404036	501	*	5.05	3.4	5.8	-2.4	9.52e-06	0.000229	0	3	5.58	8.31	17.75	53.61	63	50	-	-	-	+	+	+	H15
chr2L	1970379	1970879	501	*	4.46	1.93	5.33	-3.4	1.02e-05	0.000242	0	3	0.7	9.14	1.61	29.24	37.35	54	-	-	-	+	+	+	erm
chr2R	8030732	8031232	501	*	4.57	2.29	5.41	-3.12	1.18e-05	0.000274	0	2	0.7	9.14	4.84	46.78	57.81	23	-	-	-	+	+	-	Optix
chr3R	30764085	30764585	501	*	4.32	2.06	5.16	-3.1	1.28e-05	0.000293	0	3	0.7	2.91	8.87	41.91	30.04	35	-	-	-	+	+	+	zfh1
chr2R	7418391	7418891	501	*	5.05	3.05	5.86	-2.81	1.3e-05	0.000293	0	3	0.7	11.22	12.91	68.23	56.18	50	-	-	-	+	+	+	so
chr3R	16811668	16812168	501	*	5.54	4	6.27	-2.27	1.31e-05	0.000293	1	3	10.45	17.46	20.17	74.08	105.87	52	-	+	-	+	+	+	abd-A
chr3L	9041024	9041524	501	*	5.43	3.92	6.16	-2.24	1.54e-05	0.000339	0	2	9.06	13.72	22.59	60.43	90.77	63	-	-	-	+	+	-	Doc1
chr2L	18881290	18881790	501	*	4.55	2.78	5.32	-2.54	1.63e-05	0.000354	0	2	6.27	7.9	6.45	43.86	53.1	23	-	-	-	+	+	-	tup
chrX	11494954	11495454	501	*	4.18	2.01	5.01	-3	1.66e-05	0.000357	0	2	5.58	1.66	4.84	43.86	24.52	28	-	-	-	+	+	-	Drak
chrX	7320674	7321174	501	*	5.04	3.5	5.77	-2.27	2.12e-05	0.000451	0	3	7.67	11.64	14.52	60.43	35.88	67	-	-	-	+	+	+	CG1677
chr3R	23343704	23344204	501	*	4.19	1.96	5.02	-3.06	2.58e-05	0.00054	0	2	0.7	2.91	8.07	36.06	27.6	34	-	-	-	+	+	-	pnt
chr2L	8825207	8825707	501	*	4.91	3.23	5.67	-2.44	2.67e-05	0.000553	0	2	9.06	5.4	13.71	69.2	58.29	25	-	-	-	+	+	-	SoxN
chr2L	14490497	14490997	501	*	4.71	3.01	5.47	-2.46	2.95e-05	0.000601	0	2	4.88	12.89	6.45	31.19	55.86	46	-	-	-	+	+	-	noc
chr2R	12985554	12986054	501	*	5.55	4.08	6.26	-2.18	3.25e-05	0.000655	0	3	9.06	15.79	25.81	92.59	63.98	73	-	-	-	+	+	+	FBgn0265427
chr3R	11372492	11372992	501	*	4.54	2.53	5.35	-2.81	3.57e-05	0.000712	0	2	2.79	1.66	12.91	38.01	33.12	51	-	-	-	+	+	-	pros
chrX	15484418	15484918	501	*	3.23	-0.64	4.18	-4.83	3.82e-05	0.000752	0	2	0.7	0.42	0.81	21.44	6.98	26	-	-	-	-	+	+	Gmap
chr3L	26013961	26014461	501	*	4.33	2.42	5.12	-2.71	4.05e-05	0.000787	0	2	2.09	7.48	6.45	30.22	47.41	27	-	-	-	+	+	-	CG40178
chr3L	21476460	21476960	501	*	4.62	2.81	5.4	-2.59	4.31e-05	0.000828	1	3	1.39	7.48	12.1	37.04	52.28	37	+	-	-	+	+	+	croc
chr3L	16410413	16410913	501	*	5.51	3.81	6.27	-2.46	4.43e-05	0.000841	0	3	6.27	10.81	25.01	114.04	41.89	75	-	-	-	+	+	+	fax
chr3R	13812577	13813077	501	*	4.65	3.17	5.36	-2.19	5e-05	0.000933	0	2	9.06	9.14	8.87	33.14	54.07	36	-	-	-	-	+	+	tal-2A
chrX	16147513	16148013	501	*	3.6	0.85	4.49	-3.65	5.03e-05	0.000933	0	2	2.09	2.49	0.81	12.67	18.84	36	-	-	-	-	+	+	disco-r
chr2R	20106376	20106876	501	*	4.59	2.7	5.38	-2.68	5.1e-05	0.000933	0	2	0.7	7.48	11.29	37.04	50.99	37	-	-	-	+	+	-
chr2L	2454568	2455068	501	*	5.12	3.53	5.86	-2.33	5.21e-05	0.000933	0	2	4.88	9.56	20.17	78.95	55.05	40	-	-	-	+	+	-	dpp
chr2R	20960851	20961351	501	*	5.47	4.09	6.16	-2.07	5.23e-05	0.000933	0	3	21.6	10.81	18.55	67.25	53.91	93	-	-	-	+	+	+	hbn
chrX	6855565	6856065	501	*	4.39	2.3	5.21	-2.9	5.26e-05	0.000933	0	2	3.48	0.83	10.49	36.06	27.77	47	-	-	-	-	+	+	CG14434
chr2R	21702727	21703227	501	*	4.24	2.11	5.07	-2.95	5.33e-05	0.000936	1	2	0.7	6.65	5.65	27.29	26.47	47	+	-	-	-	+	+	HmgD
chr3R	16099628	16100128	501	*	4.17	1.94	5.01	-3.07	5.53e-05	0.000961	0	3	6.27	0.42	4.84	38.99	22.73	35	-	-	-	+	+	+	Akt1
chr3L	27266917	27267417	501	*	5.18	3.69	5.89	-2.21	6.43e-05	0.00111	0	3	5.58	12.05	20.97	53.61	76.8	48	-	-	-	+	+	+	RpL15
chr2L	2492608	2493108	501	*	4.08	2.13	4.87	-2.75	6.65e-05	0.00113	0	2	4.88	5.82	2.42	30.22	26.79	31	-	-	-	+	+	-	oaf
chr2L	11447551	11448051	501	*	5.57	4.1	6.29	-2.18	6.96e-05	0.00117	0	3	10.45	14.55	26.62	87.72	46.44	100	-	-	-	+	+	+	salm
chr2R	4130686	4131186	501	*	4.58	2.72	5.37	-2.65	7.21e-05	0.0012	0	2	11.15	2.91	5.65	17.54	68.36	38	-	-	-	-	+	+	CG17683
chr3L	10246165	10246665	501	*	4.16	2.03	4.98	-2.95	7.32e-05	0.00121	0	2	2.79	6.23	3.23	12.67	46.11	36	-	-	-	-	+	+	Or67c
chr2R	5701790	5702290	501	*	4.63	2.96	5.38	-2.42	7.47e-05	0.00122	0	2	4.18	4.57	14.52	27.29	54.56	43	-	-	-	-	+	+	vlc
chrX	7626866	7627366	501	*	4.52	2.89	5.27	-2.37	7.69e-05	0.00124	0	3	4.18	11.64	6.45	35.09	46.28	34	-	-	-	+	+	+	ct
chr3L	14578850	14579350	501	*	4.48	2.5	5.29	-2.79	7.81e-05	0.00125	0	2	0.7	4.99	11.29	21.44	47.74	48	-	-	-	-	+	+
chr3L	10739278	10739778	501	*	4.02	2.11	4.81	-2.71	8.41e-05	0.00133	0	2	5.58	3.33	4.03	27.29	22.08	35	-	-	-	+	+	-
chr2L	10544623	10545123	501	*	4.97	3.71	5.63	-1.92	8.76e-05	0.00137	0	2	11.85	13.72	13.71	50.68	52.61	45	-	-	-	-	+	+	Trim9
chr3L	14634614	14635114	501	*	5.31	3.86	6.01	-2.15	0.000112	0.00174	0	3	13.94	8.73	20.97	86.75	34.91	72	-	-	-	+	+	+	RecQ5
chr3R	15243433	15243933	501	*	3.9	1.97	4.7	-2.73	0.000132	0.00203	0	2	2.79	2.49	6.45	27.29	25.66	25	-	-	-	+	+	-	tefu
chrX	19361057	19361557	501	*	4.36	2.33	5.17	-2.84	0.000135	0.00206	0	2	0.7	9.56	4.84	20.47	49.69	38	-	-	-	-	+	+	kek5
chr3R	13901417	13901917	501	*	4.88	3.29	5.62	-2.33	0.000136	0.00206	0	2	11.15	2.91	15.33	37.04	72.26	38	-	-	-	+	+	-	ems
chr4	131889	132389	501	*	4.87	3.54	5.56	-2.02	0.000138	0.00207	1	2	13.94	12.05	8.87	34.11	64.95	42	-	+	-	+	+	-	Ank
chrX	9042306	9042806	501	*	4.49	3.02	5.2	-2.18	0.000149	0.0022	0	2	8.36	7.9	8.07	40.94	25.17	44	-	-	-	+	+	-	Nost
chr2R	20907164	20907664	501	*	3.99	1.94	4.81	-2.87	0.00015	0.0022	0	2	4.88	5.82	0.81	30.22	23.87	30	-	-	-	-	+	+	CAH15
chr2R	4671542	4672042	501	*	4.39	2.65	5.16	-2.51	0.000172	0.00251	0	2	2.09	7.9	8.87	24.37	55.86	27	-	-	-	+	+	-	CG17883
chrX	19750791	19751291	501	*	4.13	2.46	4.89	-2.43	0.000184	0.00267	0	2	6.27	3.74	6.45	31.19	22.73	35	-	-	-	+	+	-	Pmp70
chr2R	10535209	10535709	501	*	4.89	3.41	5.6	-2.2	0.000197	0.00282	1	2	4.88	10.81	16.13	74.08	42.87	29	-	-	+	+	+	-	FBgn0263466
chr3L	10674849	10675349	501	*	3.39	0.77	4.27	-3.5	0.000203	0.00289	0	2	1.39	2.91	0.81	20.47	11.53	26	-	-	-	+	+	-	simj
chrX	12938118	12938618	501	*	3.95	2	4.75	-2.75	0.000208	0.00293	1	3	1.39	3.33	7.26	22.42	23.38	35	+	-	-	+	+	+	fne
chr3R	13794457	13794957	501	*	3.2	0.56	4.08	-3.52	0.000211	0.00294	1	2	2.79	0.83	0.81	16.57	15.26	19	+	-	-	-	+	+	FBgn0051588
chr3R	26010599	26011099	501	*	4.7	2.94	5.47	-2.53	0.000213	0.00294	0	3	0.7	7.07	15.33	58.48	42.54	32	-	-	-	+	+	+	E(spl)malpha-BFM
chr2R	16828673	16829173	501	*	5.36	3.97	6.06	-2.09	0.000223	0.00305	0	3	8.36	11.22	27.43	42.89	65.76	91	-	-	-	+	+	+	FBgn0262432
chr3R	28859087	28859587	501	*	4.5	3.11	5.19	-2.09	0.000224	0.00305	0	2	6.27	7.48	12.1	30.22	46.6	33	-	-	-	+	+	-	spg
chr3L	13666682	13667182	501	*	5.24	4.04	5.89	-1.86	0.000248	0.00335	0	2	10.45	14.55	24.2	48.73	68.52	61	-	-	-	+	+	-	bru3
chrX	9134910	9135410	501	*	4.95	3.47	5.67	-2.2	0.000252	0.00335	0	2	5.58	17.87	9.68	50.68	74.69	27	-	-	-	+	+	-	fend
chr3L	9614634	9615134	501	*	3.29	0.66	4.17	-3.51	0.000255	0.00335	0	2	0.7	0.83	3.23	8.77	18.35	27	-	-	-	-	+	+	LanB2
chr2R	9692536	9693036	501	*	3.57	0.88	4.45	-3.57	0.000258	0.00335	0	2	1.39	3.33	0.81	33.14	27.6	5	-	-	-	+	+	-	Uba1
chrX	9499993	9500493	501	*	4.57	3.17	5.27	-2.1	0.000258	0.00335	1	2	11.85	8.73	6.45	27.29	56.67	32	-	-	+	+	+	-	mgl
chr3R	9877646	9878146	501	*	3.92	1.74	4.76	-3.02	0.000258	0.00335	0	2	0.7	1.25	8.07	37.04	25.01	19	-	-	-	+	+	-	FBgn0266389
chr3L	3070476	3070976	501	*	4.71	3.32	5.41	-2.09	0.000266	0.00342	0	2	6.27	6.65	16.94	55.56	33.61	38	-	-	-	+	+	-	CG11486
chr2R	24057498	24057998	501	*	5.17	3.9	5.84	-1.94	0.000268	0.00342	0	3	19.51	8.31	16.94	37.04	73.23	61	-	-	-	+	+	+	ppk29
chr2R	20913895	20914395	501	*	4.18	2.11	5	-2.9	0.000274	0.00347	0	2	10.45	1.66	0.81	20.47	31.66	44	-	-	-	-	+	+	FBgn0020617
chr3L	6125045	6125545	501	*	4.15	2.22	4.95	-2.72	0.000276	0.00347	0	2	4.88	8.31	0.81	22.42	38	32	-	-	-	-	+	+	l(3)mbn
chr2L	19363554	19364054	501	*	5.46	4.22	6.12	-1.9	0.000278	0.00347	0	2	9.06	24.11	22.59	66.28	81.67	60	-	-	-	+	+	-	dnt
chr4	1234708	1235208	501	*	3.27	0.94	4.12	-3.18	0.000295	0.00365	0	2	2.09	1.25	2.42	19.49	18.67	14	-	-	-	+	+	-	FBgn0053653
chr2R	14311532	14312032	501	*	4.5	2.82	5.26	-2.44	0.000298	0.00366	0	2	2.09	5.4	13.71	39.96	21.76	53	-	-	-	+	+	-	Shrm
chr3R	3789574	3790074	501	*	4.44	2.75	5.2	-2.46	0.000306	0.00371	0	2	4.18	7.07	8.87	10.72	49.69	50	-	-	-	-	+	+
chrX	11689541	11690041	501	*	2.77	-0.64	3.7	-4.34	0.000307	0.00371	3	2	0.7	0.42	0.81	19.49	8.44	11	+	+	+	-	+	+	bif
chrX	18300678	18301178	501	*	4.52	3.13	5.21	-2.08	0.000319	0.00383	0	2	6.97	12.05	7.26	43.86	29.07	38	-	-	-	+	+	-
chr3L	10851276	10851776	501	*	3.91	2.11	4.69	-2.58	0.000343	0.00409	0	2	2.79	3.74	6.45	36.06	22.41	19	-	-	-	+	+	-	FBgn0266679
chr3L	15043902	15044402	501	*	4.84	3.6	5.49	-1.89	0.000366	0.00433	0	2	6.97	10.81	18.55	46.78	42.22	46	-	-	-	+	+	-	ind
chr2L	2175389	2175889	501	*	3.97	2.14	4.76	-2.62	0.000385	0.00453	1	3	4.18	4.16	4.84	22.42	14.61	44	+	-	-	+	+	+	aop
chr2L	22239571	22240071	501	*	3.91	1.97	4.71	-2.74	0.000449	0.00519	0	2	0.7	6.23	4.84	25.34	32.15	21	-	-	-	+	+	-	CG3262
chr3R	20291899	20292399	501	*	4.96	3.55	5.66	-2.11	0.000451	0.00519	0	2	3.48	9.14	22.59	59.46	48.06	44	-	-	-	+	+	-	cic
chr2L	16487512	16488012	501	*	5	3.82	5.64	-1.82	0.000452	0.00519	0	2	18.12	13.72	10.49	33.14	54.23	62	-	-	-	-	+	+	dac
chr3R	5109775	5110275	501	*	5.4	4.28	6.03	-1.75	0.000504	0.00575	1	2	14.63	17.87	25.81	80.9	70.8	44	-	-	+	+	+	-	CG43131
chr3R	22133557	22134057	501	*	4.78	3.57	5.43	-1.86	0.000547	0.0062	0	2	9.06	12.89	13.71	30.22	62.35	37	-	-	-	+	+	-	SKIP
chr2L	2164872	2165372	501	*	5.07	3.76	5.74	-1.98	0.000576	0.00649	0	2	9.06	5.82	25.81	46.78	62.03	52	-	-	-	+	+	-	aop
chrX	12654195	12654695	501	*	3.86	1.87	4.67	-2.8	0.000604	0.00676	0	2	4.88	0.42	5.65	35.09	17.21	24	-	-	-	+	+	-	CkIalpha
chr2L	2161386	2161886	501	*	3.68	1.78	4.48	-2.7	0.000633	0.00703	0	2	4.18	2.08	4.03	33.14	22.73	11	-	-	-	+	+	-	aop
chr3R	20292820	20293320	501	*	5.07	3.81	5.73	-1.92	0.000643	0.0071	0	2	6.27	10.81	25.01	66.28	49.2	44	-	-	-	+	+	-	cic
chr3R	16242462	16242962	501	*	4.68	3.2	5.4	-2.21	0.000655	0.00718	0	2	1.39	9.14	16.94	42.89	48.87	35	-	-	-	+	+	-	tara
chrX	12715872	12716372	501	*	5.34	3.95	6.04	-2.09	0.00066	0.00719	1	2	6.27	16.63	23.39	41.91	117.07	38	-	-	+	+	+	-	Smr
chr2R	22685998	22686498	501	*	4.1	2.18	4.89	-2.71	0.000672	0.00727	0	2	4.88	7.9	0.81	49.71	21.43	18	-	-	-	+	+	-	Ppa
chr3R	17826102	17826602	501	*	5.48	4.39	6.1	-1.71	0.000693	0.00744	0	3	16.03	18.7	28.23	81.87	47.74	76	-	-	-	+	+	+	tinc
chr3L	19898499	19898999	501	*	3.35	0.99	4.21	-3.22	0.000697	0.00744	0	2	0.7	0.42	4.84	26.32	16.08	13	-	-	-	+	+	-	Su(Tpl)
chr2R	12958481	12958981	501	*	5.43	4.23	6.08	-1.85	0.000759	0.00805	0	2	8.36	19.54	28.23	92.59	55.05	55	-	-	-	+	+	-
chrX	10822046	10822546	501	*	3.78	1.48	4.63	-3.15	0.000778	0.00816	0	2	0.7	0.42	7.26	42.89	11.37	20	-	-	-	+	+	-	FBgn0267184
chr3R	31059448	31059948	501	*	3.33	1.08	4.16	-3.08	0.000779	0.00816	1	2	3.48	1.25	1.61	24.37	8.44	21	+	-	-	+	+	-	dco
chr2R	11100430	11100930	501	*	3.68	1.78	4.48	-2.7	0.000813	0.00846	0	2	2.09	4.99	3.23	33.14	14.61	19	-	-	-	+	+	-	luna
chrX	4910377	4910877	501	*	3.8	2.05	4.56	-2.51	0.000893	0.00923	0	2	1.39	5.4	5.65	19.49	26.47	25	-	-	-	+	+	-	CG32772
chrX	19773616	19774116	501	*	5.01	3.67	5.69	-2.03	0.000907	0.00931	0	3	3.48	11.22	23.39	70.18	40.11	45	-	-	-	+	+	+	zld
chr3R	6406572	6407072	501	*	4.56	3.17	5.25	-2.08	0.000985	0.01	0	3	2.09	9.56	15.33	38.99	32.31	43	-	-	-	+	+	+	Dmtn
chr3R	11778000	11778500	501	*	4.72	3.27	5.43	-2.16	0.000988	0.01	1	1	2.09	6.65	20.17	55.56	31.99	42	-	-	+	-	+	-	l(3)neo38
chrX	8293940	8294440	501	*	4.93	5.64	3.47	2.17	0.001	0.0101	3	2	41.81	76.9	30.65	2.92	19.32	11	+	+	+	-	+	+	nAChRalpha3
chrX	3780812	3781312	501	*	4.59	3.43	5.23	-1.8	0.00101	0.0102	0	2	6.97	10.81	14.52	38.01	45.47	29	-	-	-	+	+	-	Tlk
chr3R	7103424	7103924	501	*	4.17	2.74	4.87	-2.13	0.00109	0.0108	2	3	9.06	2.91	8.07	28.27	25.66	34	+	+	-	+	+	+	Alh
chr3R	23141842	23142342	501	*	4.37	2.88	5.08	-2.2	0.0011	0.0108	0	2	6.27	2.08	13.71	30.22	47.41	24	-	-	-	-	+	+	hh
chr2R	22689821	22690321	501	*	6.05	4.8	6.72	-1.92	0.0011	0.0108	3	3	9.76	22.86	50.82	120.86	101.32	93	+	+	+	+	+	+	Ppa
chr4	193649	194149	501	*	4.74	3.53	5.38	-1.86	0.00122	0.012	0	2	7.67	11.64	15.33	23.39	65.92	36	-	-	-	-	+	+	ABCD
chr2L	8543848	8544348	501	*	4.15	2.46	4.91	-2.45	0.00126	0.0123	0	2	0.7	4.57	11.29	33.14	20.13	37	-	-	-	-	+	+	Sema1a
chr2L	21868638	21869138	501	*	3.7	1.8	4.49	-2.7	0.0013	0.0125	0	2	0.7	1.66	8.07	23.39	18.19	26	-	-	-	-	+	+	FBgn0266222
chr3R	4346566	4347066	501	*	5.58	4.52	6.18	-1.66	0.00135	0.0129	1	2	13.24	22.45	33.07	86.75	79.73	51	-	+	-	+	+	-	hkb
chr2L	15492061	15492561	501	*	3.95	2.14	4.73	-2.59	0.00136	0.013	0	2	2.09	7.07	4.03	44.84	25.82	9	-	-	-	+	+	-
chr3R	21853772	21854272	501	*	3.55	1.61	4.35	-2.74	0.00138	0.0131	0	2	6.27	2.08	0.81	27.29	16.72	17	-	-	-	+	+	-	glec
chr2R	6516520	6517020	501	*	3.84	2.09	4.61	-2.52	0.00141	0.0133	0	2	6.97	4.99	0.81	33.14	19.16	21	-	-	-	+	+	-	jing
chr3L	11010292	11010792	501	*	4.85	3.37	5.56	-2.19	0.00144	0.0135	0	2	6.27	2.91	21.78	24.37	37.18	80	-	-	-	-	+	+	klu
chr2R	21480679	21481179	501	*	4.11	2.55	4.84	-2.29	0.00147	0.0137	0	2	9.76	3.74	4.03	47.76	20.13	18	-	-	-	+	+	-	Sdc
chrX	13128668	13129168	501	*	2.9	0.53	3.76	-3.22	0.00149	0.0138	0	2	0.7	0.42	3.23	11.7	12.83	16	-	-	-	+	+	-	CG15717
chr2L	10408016	10408516	501	*	5.2	4.24	5.77	-1.53	0.00156	0.0144	0	3	20.91	15.79	20.17	39.96	64.14	60	-	-	-	+	+	+	RpS27A
chr3L	22863541	22864041	501	*	4.59	3.46	5.21	-1.75	0.00159	0.0146	0	2	12.54	13.3	7.26	31.19	49.2	31	-	-	-	+	+	-	CG33169
chrX	8661123	8661623	501	*	2.65	-0.13	3.55	-3.67	0.00161	0.0147	1	1	0.7	1.25	0.81	12.67	5.36	17	+	-	-	-	-	+
chr2R	24275309	24275809	501	*	4.77	3.63	5.39	-1.76	0.00164	0.0149	0	2	7.67	16.63	12.91	51.66	49.52	25	-	-	-	+	+	-	nvy
chr3R	21605313	21605813	501	*	5.48	4.26	6.13	-1.86	0.00166	0.015	0	3	16.73	6.23	34.69	91.62	62.35	56	-	-	-	+	+	+	InR
chrX	7095988	7096488	501	*	4.26	3.04	4.91	-1.87	0.00169	0.0152	0	2	8.36	7.48	8.87	38.01	26.47	26	-	-	-	+	+	-	Sxl
chr2L	4028746	4029246	501	*	4.22	2.87	4.91	-2.04	0.00174	0.0155	0	2	8.36	10.39	3.23	28.27	28.9	33	-	-	-	+	+	-	ed
chrX	8210603	8211103	501	*	3.51	1.56	4.3	-2.74	0.00175	0.0155	0	2	0.7	3.33	4.84	32.16	14.13	13	-	-	-	+	+	-	sdt
chrX	6862674	6863174	501	*	5.2	3.99	5.85	-1.86	0.00178	0.0157	1	3	12.54	5.4	29.85	72.13	44.33	57	+	-	-	+	+	+	CG14434
chr2L	4031679	4032179	501	*	4.9	3.85	5.5	-1.65	0.0019	0.0167	0	3	8.36	11.64	23.39	40.94	50.01	45	-	-	-	+	+	+	ed
chrX	10289839	10290339	501	*	5.2	5.79	4.17	1.62	0.00191	0.0167	2	2	51.57	34.5	79.86	21.44	12.5	20	+	-	+	-	+	+	alpha-Man-Ia
chr2L	21236887	21237387	501	*	4.6	3.33	5.27	-1.94	0.00198	0.0172	0	2	7.67	12.05	10.49	12.67	54.88	48	-	-	-	-	+	+	CG31626
chr2R	20996459	20996959	501	*	3.64	1.61	4.45	-2.84	0.00201	0.0173	0	2	0.7	0.42	8.07	27.29	17.21	21	-	-	-	+	+	-	dgt3
chr3R	19930901	19931401	501	*	4.9	3.89	5.49	-1.6	0.00206	0.0177	0	3	9.76	15.38	19.36	50.68	34.42	50	-	-	-	+	+	+	CG4459
chrX	409393	409893	501	*	4.99	3.88	5.61	-1.74	0.00208	0.0178	0	3	6.97	12.05	25.01	66.28	43.52	37	-	-	-	+	+	+	l(1)sc
chr2R	5359882	5360382	501	*	3.85	2.15	4.61	-2.45	0.00211	0.0179	0	2	0.7	4.57	8.07	29.24	29.88	14	-	-	-	+	+	-	CG10417
chrX	9749573	9750073	501	*	3.61	2.06	4.34	-2.28	0.00212	0.0179	1	3	5.58	2.91	4.03	18.52	21.43	21	+	-	-	+	+	+	Sp1
chr2R	17823382	17823882	501	*	5.19	4.2	5.78	-1.58	0.00214	0.018	0	3	10.45	19.54	25.01	43.86	52.61	68	-	-	-	+	+	+	grh
chr3L	11237155	11237655	501	*	5.16	4.12	5.76	-1.63	0.00216	0.018	0	2	15.33	8.73	28.23	51.66	48.71	62	-	-	-	-	+	+	Ir68a
chr3L	12572329	12572829	501	*	4.76	3.68	5.37	-1.69	0.00217	0.018	0	3	12.54	13.72	12.1	20.47	52.45	51	-	-	-	+	+	+	sowah
chr2R	21502390	21502890	501	*	3.92	2.31	4.66	-2.35	0.00219	0.0182	1	2	1.39	6.23	7.26	21.44	17.21	37	+	-	-	-	+	+	TAF1C-like
chr2R	23045959	23046459	501	*	4.26	2.69	4.99	-2.29	0.00223	0.0184	0	2	0.7	5.82	12.91	26.32	47.9	21	-	-	-	+	+	-	twi
chr3R	10170230	10170730	501	*	4.35	3.06	5.02	-1.96	0.00236	0.0194	0	2	4.18	6.23	14.52	35.09	20.95	41	-	-	-	-	+	+	Best1
chr2R	23573104	23573604	501	*	4.38	3.08	5.06	-1.98	0.00241	0.0197	0	2	6.27	3.74	15.33	46.78	31.99	21	-	-	-	+	+	-	apt
chr3L	1366847	1367347	501	*	5.19	4.06	5.81	-1.75	0.0025	0.0202	1	3	6.27	12.47	31.46	53.61	49.69	65	-	-	+	+	+	+	Ptp61F
chr2R	19207068	19207568	501	*	3.06	3.89	0.86	3.02	0.0025	0.0202	2	1	20.91	4.99	18.55	0.97	0.49	4	+	-	+	+	-	-	hppy
chrX	19546595	19547095	501	*	3.72	2.09	4.47	-2.38	0.00251	0.0202	1	2	6.27	0.83	5.65	21.44	24.03	21	+	-	-	+	+	-	CG32532
chr3R	5038801	5039301	501	*	5.17	4.04	5.79	-1.75	0.00253	0.0203	0	3	8.36	11.22	29.85	71.15	62.84	32	-	-	-	+	+	+
chr2R	11891768	11892268	501	*	4.44	3.24	5.08	-1.84	0.00257	0.0204	0	2	8.36	7.07	12.91	16.57	35.07	50	-	-	-	-	+	+	FBgn0015543
chrX	3136244	3136744	501	*	4.8	3.54	5.46	-1.92	0.00257	0.0204	0	2	4.88	4.99	25.01	53.61	34.42	44	-	-	-	+	+	-	N
chr3L	20402528	20403028	501	*	4.47	3.41	5.08	-1.67	0.00261	0.0206	0	2	11.85	9.56	10.49	23.39	37.02	41	-	-	-	+	+	-	trbl
chr2L	5301243	5301743	501	*	4.09	2.66	4.79	-2.13	0.00269	0.0211	0	3	4.18	6.65	8.07	26.32	13.64	43	-	-	-	+	+	+	vri
chr2L	6794264	6794764	501	*	3.27	1.42	4.05	-2.63	0.0027	0.0211	1	3	0.7	2.49	4.84	14.62	18.19	17	+	-	-	+	+	+	nrv2
chrUn_CP007080v1	1742	2242	501	*	4.89	5.49	3.83	1.66	0.00275	0.0214	2	1	69.69	42.81	22.59	14.62	14.13	14	+	+	-	-	+	-
chr2R	16514787	16515287	501	*	3.91	2.32	4.65	-2.33	0.00283	0.0219	0	2	0.7	5.4	8.87	24.37	19.81	31	-	-	-	-	+	+	Sema2a
chr2R	20831702	20832202	501	*	3.72	1.91	4.5	-2.58	0.0029	0.0223	0	2	0.7	4.16	6.45	40.94	11.85	15	-	-	-	+	+	-	insc
chr3R	6810505	6811005	501	*	4.85	3.72	5.48	-1.75	0.00296	0.0227	0	2	6.27	9.14	24.2	62.38	35.07	36	-	-	-	+	+	-	FBgn0261503
chrX	7110802	7111302	501	*	3.74	2.24	4.46	-2.22	0.00302	0.023	0	3	3.48	5.82	4.84	13.65	20.46	32	-	-	-	+	+	+	fz4
chr3R	23201013	23201513	501	*	4.44	3.25	5.09	-1.84	0.00303	0.023	1	1	17.42	5.4	5.65	31.19	44	27	+	-	-	-	+	-	cnc
chr3R	21618298	21618798	501	*	4.46	3.18	5.13	-1.95	0.00306	0.0232	0	3	6.97	2.49	17.75	33.14	29.88	42	-	-	-	+	+	+	FBgn0264826
chr3R	16702834	16703334	501	*	4.8	2.49	5.64	-3.15	0.00311	0.0234	0	3	0.7	1.66	14.52	52.63	48.23	49	-	-	-	+	+	+	Ubx
chr3L	2635415	2635915	501	*	4.6	3.59	5.18	-1.6	0.00325	0.0244	0	2	16.03	7.9	12.1	39.96	30.04	39	-	-	-	+	+	-	MEP-1
chr3L	16407824	16408324	501	*	4.14	2.95	4.78	-1.84	0.00327	0.0244	0	2	10.45	5.4	7.26	30.22	25.49	27	-	-	-	-	+	+	fax
chr2R	16516974	16517474	501	*	3.73	2.11	4.47	-2.36	0.00331	0.0246	0	2	5.58	2.49	4.84	38.01	20.46	8	-	-	-	+	+	-	Sema2a
chr4	67051	67551	501	*	4.27	2.8	4.98	-2.17	0.00334	0.0246	0	2	6.27	5.82	8.87	5.85	54.72	34	-	-	-	-	+	+	RpS3A
chr3R	14286739	14287239	501	*	4.97	3.97	5.56	-1.58	0.00335	0.0246	1	2	8.36	14.55	24.2	53.61	35.56	52	-	-	+	+	+	-	trx
chr2R	17801574	17802074	501	*	5.87	4.73	6.5	-1.77	0.00336	0.0246	1	3	9.76	17.46	52.43	99.42	69.98	103	-	-	+	+	+	+	grh
chr3L	20517282	20517782	501	*	5.5	4.34	6.14	-1.8	0.00347	0.0253	1	3	9.06	10.39	41.14	89.67	44.49	77	-	-	+	+	+	+	CG5059
chr2R	11794073	11794573	501	*	5.08	4.17	5.64	-1.47	0.00348	0.0253	0	3	12.54	19.54	21.78	59.46	38.16	52	-	-	-	+	+	+	ths
chr2L	11970865	11971365	501	*	4.25	2.82	4.95	-2.13	0.00355	0.0256	0	2	0.7	10.81	9.68	31.19	35.72	26	-	-	-	+	+	-	FBgn0263019
chr2R	14482350	14482850	501	*	3.78	2.34	4.49	-2.15	0.00356	0.0256	0	2	4.18	2.91	8.07	27.29	26.95	13	-	-	-	+	+	-	PRAS40
chr3R	16403640	16404140	501	*	4.23	3	4.89	-1.89	0.00376	0.0269	0	2	7.67	6.65	9.68	24.37	49.52	15	-	-	-	+	+	-	ss
chr2R	24046603	24047103	501	*	4.18	2.84	4.86	-2.02	0.00379	0.027	0	2	4.18	12.47	4.84	17.54	39.78	30	-	-	-	-	+	+	sei
chr3R	4381053	4381553	501	*	2.67	0.26	3.53	-3.27	0.00384	0.0273	0	2	0.7	2.08	0.81	8.77	6.82	19	-	-	-	-	+	+	Sfxn1-3
chrX	19775231	19775731	501	*	3.88	2.05	4.66	-2.61	0.00394	0.0279	2	2	0.7	0.42	11.29	23.39	24.36	28	+	-	+	+	+	-	zld
chr3R	31221617	31222117	501	*	4.9	3.99	5.45	-1.46	0.00397	0.0279	0	2	11.85	16.63	19.36	46.78	35.4	49	-	-	-	+	+	-	ATPsynC
chr3R	30794571	30795071	501	*	4.51	1.95	5.38	-3.43	0.00398	0.0279	0	2	0.7	0.42	10.49	42.89	42.87	39	-	-	-	+	+	-	wts
chr3L	11215585	11216085	501	*	2.92	0.8	3.74	-2.94	0.00409	0.0286	1	3	0.7	2.91	1.61	11.7	8.44	20	+	-	-	+	+	+	CG42671
chr3R	4801950	4802450	501	*	5.04	3.88	5.68	-1.8	0.00418	0.029	3	3	19.51	5.4	19.36	60.43	21.27	72	+	+	+	+	+	+	ctrip
chr2R	3500512	3501012	501	*	2.66	-0.13	3.55	-3.68	0.00419	0.029	0	3	0.7	1.25	0.81	0.97	28.25	6	-	-	-	+	+	+
chr3R	23157086	23157586	501	*	4.22	2.7	4.94	-2.24	0.00427	0.0294	0	2	6.97	0.42	12.1	41.91	24.19	26	-	-	-	+	+	-	unk
chrX	12742270	12742770	501	*	4.61	3.58	5.2	-1.62	0.00431	0.0295	1	1	6.97	10.39	18.55	32.16	51.31	27	-	-	+	-	+	-	CG4004
chrX	6920855	6921355	501	*	2.38	3.22	0.14	3.08	0.00438	0.03	2	0	10.45	5.4	12.1	0.97	0.32	2	+	-	+	-	-	-	CG14431
chr3L	9461847	9462347	501	*	4.08	2.88	4.72	-1.84	0.00444	0.0302	0	2	9.06	4.16	8.87	20.47	28.74	30	-	-	-	-	+	+	CG3434
chr3R	16250033	16250533	501	*	4.89	3.8	5.5	-1.71	0.00468	0.0317	0	3	4.18	13.3	24.2	56.53	32.48	47	-	-	-	+	+	+	tara
chr2R	13992281	13992781	501	*	3.86	2.41	4.56	-2.15	0.00469	0.0317	0	2	2.09	5.82	8.07	37.04	19.97	14	-	-	-	+	+	-	mam
chr2L	3606532	3607032	501	*	5.84	4.99	6.37	-1.38	0.00483	0.0325	1	3	22.3	27.85	45.17	76.03	80.86	91	-	-	+	+	+	+	odd
chrX	12750575	12751075	501	*	3.72	2.04	4.47	-2.43	0.00488	0.0326	0	2	6.27	0.42	5.65	13.65	16.89	36	-	-	-	-	+	+	FBgn0265830
chr3L	22402829	22403329	501	*	5.99	5.1	6.53	-1.43	0.00489	0.0326	2	3	33.45	20.37	49.21	111.11	87.03	80	-	+	+	+	+	+	Ten-m
chr3R	20543219	20543719	501	*	5.42	4.52	5.97	-1.45	0.00492	0.0327	0	3	12.54	22.45	33.88	75.05	58.62	54	-	-	-	+	+	+	Stat92E
chrX	3845447	3845947	501	*	4.74	3.81	5.3	-1.49	0.00499	0.033	1	2	16.73	7.48	17.75	36.06	38.81	43	+	-	-	+	+	-	ec
chr3R	5126825	5127325	501	*	4.71	3.78	5.28	-1.5	0.00501	0.033	1	3	20.21	10.39	10.49	36.06	49.36	31	+	-	-	+	+	+	CG12007
chr2R	8649167	8649667	501	*	4.24	3.05	4.88	-1.83	0.00515	0.0337	0	2	2.79	9.14	12.91	31.19	31.01	26	-	-	-	+	+	-	ptc
chr3L	25012265	25012765	501	*	4.23	4.85	3.12	1.73	0.00517	0.0337	3	3	31.36	18.29	37.11	10.72	5.36	10	+	+	+	+	+	+
chr3R	8857541	8858041	501	*	4.52	3.51	5.11	-1.6	0.00526	0.0343	0	3	7.67	7.9	18.55	34.11	28.42	41	-	-	-	+	+	+	pyd
chr3R	21598552	21599052	501	*	3.58	1.93	4.33	-2.4	0.00531	0.0343	0	2	4.88	3.33	3.23	32.16	6.17	22	-	-	-	+	-	+	InR
chr3R	11773560	11774060	501	*	4.49	3.28	5.14	-1.85	0.00532	0.0343	1	1	6.97	2.91	19.36	44.84	23.87	37	-	-	+	-	+	-	l(3)neo38
chr3R	14046506	14047006	501	*	2.31	3.21	-0.49	3.7	0.00534	0.0343	2	3	1.39	2.91	23.39	0.97	0.16	1	+	-	+	+	+	+	FBgn0011971
chr3L	4480433	4480933	501	*	4.1	4.87	2.29	2.59	0.00545	0.0349	2	1	28.57	17.46	41.95	0.97	12.67	1	+	+	-	-	+	-	CG7465
chr2L	19158196	19158696	501	*	4.78	3.56	5.44	-1.88	0.00558	0.0355	0	2	2.09	7.48	25.81	57.51	38.32	34	-	-	-	+	+	-	brat
chr2R	6573369	6573869	501	*	5.43	4.49	6	-1.51	0.00559	0.0355	0	3	8.36	25.77	33.07	66.28	67.55	58	-	-	-	+	+	+	jing
chr3L	21479557	21480057	501	*	4.62	3.29	5.3	-2.01	0.00561	0.0355	0	3	0.7	10.81	17.75	21.44	37.51	59	-	-	-	+	+	+
chr3R	26024403	26024903	501	*	5.1	4.17	5.67	-1.5	0.00564	0.0355	1	2	9.06	18.29	26.62	39.96	71.28	41	-	-	+	+	+	-	E(spl)m4-BFM
chrX	20694015	20694515	501	*	5.65	4.67	6.23	-1.56	0.00585	0.0368	1	3	11.15	23.28	41.95	87.72	90.93	46	-	+	-	+	+	+	run
chr2R	21522022	21522522	501	*	5.5	4.59	6.06	-1.47	0.00603	0.0375	1	3	10.45	32.84	29.04	60.43	77.29	62	-	+	-	+	+	+	Egfr
chr2R	12959968	12960468	501	*	3.44	1.57	4.23	-2.66	0.00603	0.0375	0	2	7.67	0.42	0.81	24.37	20.78	11	-	-	-	+	+	-
chr2L	12618395	12618895	501	*	3.83	2.53	4.51	-1.98	0.00603	0.0375	1	2	3.48	3.33	10.49	24.37	21.76	22	+	-	-	-	+	+	Ref2
chrX	3861893	3862393	501	*	4.88	4.04	5.41	-1.37	0.00616	0.0381	0	2	22.3	13.3	13.71	39.96	47.25	40	-	-	-	+	+	-	FBgn0019661
chr3L	15554174	15554674	501	*	3.38	1.83	4.11	-2.29	0.00631	0.0389	1	2	2.09	2.91	5.65	18.52	10.39	23	-	-	+	-	+	+	AGO2
chr3R	7963468	7963968	501	*	4.79	3.6	5.44	-1.84	0.00635	0.039	0	3	3.48	4.57	28.23	48.73	44.33	37	-	-	-	+	+	+	dsx
chr3L	1746372	1746872	501	*	5.77	4.89	6.31	-1.42	0.00642	0.0391	1	2	28.57	19.12	41.14	76.03	110.58	51	-	-	+	+	+	-	CG13921
chr3L	2867503	2868003	501	*	3.84	2.19	4.59	-2.4	0.00642	0.0391	0	2	2.79	0.42	10.49	38.99	19.16	14	-	-	-	+	+	-	Tet
chr2L	8841692	8842192	501	*	5.24	4.41	5.77	-1.36	0.00651	0.0395	1	1	13.94	22.45	27.43	67.25	54.4	42	-	-	+	-	+	-
chr2R	11237482	11237982	501	*	4.45	3.47	5.04	-1.57	0.00694	0.042	0	2	9.76	14.55	8.87	20.47	39.94	38	-	-	-	-	+	+	CG13217
chr3L	2879396	2879896	501	*	5.25	4.25	5.84	-1.58	0.00707	0.0426	2	3	12.54	7.48	37.11	69.2	54.07	48	+	-	+	+	+	+	Tet
chr3R	29287307	29287807	501	*	3.33	1.79	4.06	-2.27	0.0071	0.0426	0	2	6.27	1.66	2.42	20.47	15.59	14	-	-	-	+	+	-
chr2L	16325601	16326101	501	*	3.5	1.97	4.22	-2.26	0.00713	0.0427	0	2	3.48	5.82	2.42	21.44	26.63	8	-	-	-	+	+	-	cact
chr3L	17446058	17446558	501	*	3.35	1.73	4.09	-2.36	0.00757	0.0451	1	2	6.27	2.08	1.61	11.7	12.34	27	+	-	-	-	+	+	CG18265
chr3R	11775109	11775609	501	*	5.51	4.75	6	-1.25	0.00759	0.0451	2	3	28.57	20.78	31.46	68.23	56.34	68	+	-	+	+	+	+	l(3)neo38
chr3R	28585307	28585807	501	*	4.38	3.28	5	-1.72	0.00775	0.0459	0	2	4.18	12.05	12.91	36.06	43.68	16	-	-	-	+	+	-	fkh
chr3R	30912307	30912807	501	*	4.9	2.88	5.71	-2.84	0.00791	0.0466	0	2	6.27	0.42	15.33	42.89	66.25	48	-	-	-	+	+	-	Ptx1
chr3R	19350461	19350961	501	*	4.55	3.46	5.16	-1.71	0.00834	0.0489	0	2	3.48	14.13	15.33	53.61	34.91	19	-	-	-	+	+	-
chr2R	13579593	13580093	501	*	4.43	3.45	5.01	-1.56	0.00835	0.0489	0	2	6.27	7.9	18.55	26.32	37.18	33	-	-	-	+	+	-	FBgn0265497
chr3L	131044	131544	501	*	5.42	3.64	6.2	-2.56	0.00839	0.0489	3	3	4.18	3.33	29.85	104.29	60.89	55	+	+	+	+	+	+	Pdk1
chrX	22432857	22433357	501	*	2.59	-0.64	3.51	-4.15	0.00845	0.0491	2	3	0.7	0.42	0.81	0.97	0.16	33	+	-	+	+	+	+
chr3L	10857396	10857896	501	*	4.42	3.22	5.07	-1.84	0.00847	0.0491	0	2	6.97	2.49	18.55	17.54	32.96	50	-	-	-	-	+	+	tna
chr3L	6964607	6965107	501	*	4.77	3.84	5.34	-1.5	0.00869	0.0501	1	1	6.97	13.3	22.59	45.81	51.31	24	-	-	+	-	+	-	sgl
chrX	12889964	12890464	501	*	4.37	4.98	3.3	1.68	0.00872	0.0502	3	3	36.94	13.3	44.37	13.65	7.96	8	+	+	+	+	+	+	Pde9
chrX	12925460	12925960	501	*	3.6	2.11	4.32	-2.21	0.00913	0.0522	0	2	0.7	5.82	6.45	23.39	12.5	24	-	-	-	+	+	-	fne
chr3R	29774492	29774992	501	*	4.38	3.41	4.96	-1.55	0.00915	0.0522	1	1	9.06	5.82	16.94	26.32	29.88	37	+	-	-	-	+	-	kay
chr3L	19928975	19929475	501	*	2.36	0.24	3.19	-2.95	0.00929	0.0529	1	2	0.7	0.42	2.42	3.9	10.39	13	+	-	-	-	+	+	CG8004
chrX	11354630	11355130	501	*	2.57	0.5	3.39	-2.89	0.00945	0.0536	1	1	1.39	0.42	2.42	10.72	3.73	17	+	-	-	-	-	+	dsh
chrX	3134587	3135087	501	*	3.85	2.69	4.48	-1.79	0.00973	0.0548	0	2	8.36	5.4	5.65	26.32	26.79	14	-	-	-	+	+	-	N
chrX	10656789	10657289	501	*	2.47	3.27	0.56	2.71	0.00973	0.0548	2	2	11.85	4.99	12.1	2.92	0.49	1	+	+	-	+	-	+	CG2111
chr2L	9454315	9454815	501	*	4.22	2.84	4.91	-2.07	0.00988	0.0555	0	2	0.7	5.4	15.33	44.84	33.29	12	-	-	-	+	+	-	numb
chr3L	20823441	20823941	501	*	3.89	4.55	2.64	1.92	0.01	0.0562	2	1	21.6	27.85	20.97	2.92	9.74	6	+	+	-	-	+	-	Pka-R1
chr3L	17415732	17416232	501	*	4.23	3.13	4.85	-1.71	0.0102	0.0566	0	3	7.67	3.33	15.33	35.09	32.15	19	-	-	-	+	+	+	blot
chr3L	12467932	12468432	501	*	4.47	2.05	5.33	-3.28	0.0102	0.0566	0	2	0.7	0.42	11.29	29.24	62.35	29	-	-	-	+	+	-	eyg
chr3L	22582143	22582643	501	*	4.32	4.95	3.18	1.77	0.0105	0.0579	3	3	26.48	12.47	54.05	7.8	4.38	15	+	+	+	+	+	+	CG14459
chr3R	8187716	8188216	501	*	3.26	1.83	3.97	-2.14	0.0107	0.059	0	2	2.09	2.91	5.65	9.75	18.19	19	-	-	-	-	+	+
chr2R	14458190	14458690	501	*	4.37	3.42	4.94	-1.52	0.0108	0.0592	0	2	7.67	9.14	15.33	42.89	26.14	23	-	-	-	+	+	-	Oaz
chrY_CP007114v1_random	21796	22296	501	*	4.84	5.43	3.85	1.57	0.0109	0.0597	3	3	27.88	21.2	79.86	15.59	7.79	20	+	+	+	+	+	+
chr2R	21713006	21713506	501	*	4.24	2.83	4.94	-2.11	0.0109	0.0597	0	2	0.7	2.08	18.55	39.96	30.04	22	-	-	-	+	+	-	HmgD
chr3L	8675446	8675946	501	*	5.37	4.67	5.84	-1.18	0.011	0.0601	1	2	23	23.28	29.85	51.66	65.27	55	+	-	-	+	+	-	h
chr2R	14173398	14173898	501	*	3.58	2.02	4.31	-2.29	0.0113	0.0614	0	2	0.7	5.82	5.65	6.82	17.86	35	-	-	-	-	+	+	cg
chr2L	22578838	22579338	501	*	4.16	2.93	4.82	-1.89	0.0115	0.062	0	2	6.97	5.4	10.49	6.82	54.72	23	-	-	-	-	+	+	Slmap
chrX	5052760	5053260	501	*	5.06	4.27	5.57	-1.31	0.0119	0.064	0	3	22.3	10.39	25.01	35.09	48.87	59	-	-	-	+	+	+	ovo
chr2L	7009689	7010189	501	*	4.34	3.19	4.97	-1.78	0.012	0.0647	0	2	5.58	3.33	18.55	40.94	16.08	37	-	-	-	+	+	-	uif
chr2R	13191686	13192186	501	*	3.76	2.34	4.46	-2.11	0.0128	0.0685	0	2	8.36	0.42	6.45	27.29	14.61	24	-	-	-	+	+	-	seq
chrX	12926012	12926512	501	*	3.78	2.47	4.45	-1.99	0.0129	0.0688	1	3	7.67	1.66	7.26	15.59	13.15	37	+	-	-	+	+	+	fne
chr3R	29074150	29074650	501	*	4.31	3.27	4.91	-1.64	0.013	0.0692	0	2	5.58	15.38	8.07	41.91	32.48	16	-	-	-	+	+	-	CG11873
chr2R	10583144	10583644	501	*	5.94	5.08	6.48	-1.39	0.0135	0.0713	1	3	14.63	29.1	58.08	103.32	69.01	95	-	+	-	+	+	+	psq
chr3R	4867588	4868088	501	*	2.85	1.12	3.62	-2.5	0.0135	0.0713	3	3	4.88	0.83	0.81	7.8	12.99	16	+	+	+	+	+	+	opa
chr2R	23580548	23581048	501	*	4.24	3	4.89	-1.89	0.014	0.0735	0	2	0.7	9.56	13.71	45.81	25.33	18	-	-	-	+	+	-	apt
chr2R	22860103	22860603	501	*	4.33	3.33	4.92	-1.59	0.0141	0.0741	2	3	12.54	6.23	11.29	50.68	17.86	22	+	-	+	+	+	+	inaD
chr3L	20695136	20695636	501	*	4.11	2.96	4.75	-1.79	0.0144	0.0756	1	1	3.48	3.74	16.13	15.59	39.94	25	-	+	-	-	+	-	kni
chr3R	7474697	7475197	501	*	4.07	2.81	4.74	-1.93	0.0146	0.076	0	2	0.7	4.99	15.33	34.11	22.89	23	-	-	-	+	+	-	FBgn0012000
chrX	3779678	3780178	501	*	4.36	3.4	4.93	-1.52	0.0151	0.0785	2	2	9.06	4.16	18.55	28.27	35.88	27	+	-	+	+	+	-	Tlk
chr2R	21101613	21102113	501	*	3.92	2.88	4.53	-1.65	0.0154	0.0797	1	2	4.88	6.65	10.49	28.27	25.82	15	+	-	-	+	+	-	ktub
chr3R	23886526	23887026	501	*	5.88	4.86	6.48	-1.62	0.0155	0.08	1	3	12.54	10.81	63.73	132.56	58.62	76	-	-	+	+	+	+	Pli
chr3R	21644351	21644851	501	*	4.54	3.4	5.17	-1.76	0.0157	0.0809	0	2	0.7	12.47	18.55	29.24	26.47	52	-	-	-	-	+	+	E2f1
chr2R	23645631	23646131	501	*	5.69	4.9	6.19	-1.29	0.0158	0.0812	2	3	25.09	16.21	48.4	57.51	67.22	95	+	-	+	+	+	+	retn
chr2R	15127685	15128185	501	*	4.61	3.53	5.21	-1.68	0.0159	0.0812	1	3	3.48	5.4	25.81	48.73	20.62	42	-	-	+	+	+	+	chn
chr3R	15920685	15921185	501	*	4.57	3.63	5.13	-1.5	0.016	0.0817	1	2	8.36	5.4	23.39	31.19	25.98	48	-	-	+	-	+	+	Fbxl7
chr2L	21899129	21899629	501	*	4.15	3.2	4.71	-1.52	0.0162	0.0824	0	3	6.97	12.47	8.07	29.24	23.54	26	-	-	-	+	+	+	CG11629
chr2R	15132309	15132809	501	*	5.06	4.34	5.54	-1.2	0.017	0.086	0	2	21.6	18.29	20.97	66.28	39.62	34	-	-	-	+	+	-	chn
chr2R	6612814	6613314	501	*	4.45	3.39	5.05	-1.66	0.017	0.086	0	2	2.09	8.31	20.97	44.84	35.56	19	-	-	-	+	+	-	jing
chr3L	19044298	19044798	501	*	5.06	4.31	5.55	-1.24	0.0172	0.0862	0	2	16.73	11.22	31.46	51.66	48.71	40	-	-	-	+	+	-	nkd
chr2L	21429746	21430444	699	*	3.55	1.85	4.31	-2.46	0.0172	0.0862	3	3	0.7	0.42	9.68	36.06	5.52	18	+	+	+	+	+	+	FBgn0053805
chr2R	18802412	18802912	501	*	3.67	2.36	4.34	-1.99	0.0172	0.0862	0	2	1.39	8.31	5.65	23.39	28.42	9	-	-	-	+	+	-	MFS14
chr2R	21250754	21251254	501	*	4.51	3.7	5.03	-1.32	0.0174	0.0869	0	2	9.76	9.14	20.17	38.01	31.83	28	-	-	-	+	+	-	ASPP
chrX	8213975	8214475	501	*	5.14	4.22	5.7	-1.48	0.0175	0.087	0	2	13.24	8.73	33.88	45.81	25.33	85	-	-	-	-	+	+	sdt
chrX	23211518	23212509	992	*	4.21	4.81	3.15	1.66	0.0175	0.087	3	2	42.51	16.63	25.01	2.92	8.77	15	+	+	+	-	+	+	FBgn0085813
chr2R	19293044	19293544	501	*	3.56	2.26	4.24	-1.98	0.0178	0.0879	0	2	2.09	5.82	6.45	10.72	12.83	33	-	-	-	-	+	+	mip40
chr2L	8416308	8416808	501	*	4.69	3.77	5.25	-1.47	0.0179	0.0882	2	2	11.85	4.16	25.01	50.68	33.12	30	+	-	+	+	+	-	Akap200
chrX	2428789	2429289	501	*	4.97	4.22	5.46	-1.24	0.0179	0.0882	0	2	10.45	22.86	22.59	37.04	57.97	37	-	-	-	+	+	-	gt
chr3R	4852291	4852791	501	*	5.09	4.36	5.58	-1.22	0.0182	0.0889	0	2	14.63	17.87	29.04	38.01	69.5	36	-	-	-	+	+	-	opa
chrX	6861502	6862002	501	*	4.08	2.82	4.75	-1.93	0.0182	0.0889	0	2	0.7	9.14	11.29	10.72	26.95	43	-	-	-	-	+	+	CG14434
chr2R	13342732	13343232	501	*	3.06	1.46	3.79	-2.33	0.0183	0.0892	0	2	1.39	0.42	6.45	8.77	11.85	21	-	-	-	-	+	+	FBgn0265104
chrX_DS483655v1_random	10630	11130	501	*	3.87	4.51	2.68	1.82	0.0185	0.0901	2	1	27.18	24.94	16.13	0.97	7.31	11	+	+	-	-	+	-
chr2L	2329818	2330318	501	*	4.44	5.02	3.47	1.55	0.0188	0.0909	2	0	35.54	12.47	49.21	7.8	6.33	19	+	-	+	-	-	-	CG9967
chr3R	12128389	12128889	501	*	5.14	4.38	5.63	-1.25	0.0188	0.0909	0	2	9.76	25.35	27.43	54.58	55.86	38	-	-	-	+	+	-	FBgn0011905
chrX	18298169	18298669	501	*	4.08	3.17	4.64	-1.46	0.0196	0.0943	1	3	11.15	6.23	9.68	25.34	22.25	27	+	-	-	+	+	+
chr2L	9988114	9988614	501	*	5.01	4.17	5.54	-1.37	0.0199	0.0958	0	2	5.58	16.21	32.27	36.06	52.61	51	-	-	-	-	+	+	bib
chr3L	14977441	14977941	501	*	4.84	4.05	5.35	-1.29	0.0201	0.0961	0	2	6.97	15.38	27.43	41.91	43.03	37	-	-	-	-	+	+	CG3349
chrX	590427	590927	501	*	4.21	3.32	4.75	-1.43	0.0205	0.0977	1	3	13.24	7.07	9.68	20.47	39.46	21	+	-	-	+	+	+	CG13366
chr3R	29063607	29064107	501	*	3.28	1.92	3.96	-2.04	0.0205	0.0977	0	2	2.79	2.91	5.65	4.87	16.89	25	-	-	-	-	+	+	Cul5
chr2R	9979055	9979555	501	*	5.17	4.48	5.64	-1.16	0.0207	0.0981	0	2	20.91	13.72	32.27	55.56	54.07	40	-	-	-	+	+	-	eve
chr3L	6752177	6752677	501	*	4.03	2.99	4.62	-1.64	0.0207	0.0981	0	2	7.67	12.05	4.03	31.19	28.74	14	-	-	-	+	+	-	velo
chr3L	1463483	1463983	501	*	5.7	4.75	6.26	-1.51	0.0208	0.0981	1	3	6.27	17.46	57.27	61.4	70.31	99	-	-	+	+	+	+	rho
chr2R	1194465	1194965	501	*	3.65	4.33	2.31	2.03	0.0209	0.0981	2	0	24.39	4.57	31.46	1.95	3.9	9	+	-	+	-	-	-
chr3R	1292804	1293304	501	*	2.71	3.45	1.13	2.32	0.0215	0.101	2	0	8.36	4.99	19.36	3.9	0.65	2	+	-	+	-	-	-	Myo81F
chr2L	3825316	3825816	501	*	5.3	4.63	5.75	-1.12	0.0216	0.101	1	3	20.91	22.03	31.46	58.48	65.76	37	-	-	+	+	+	+	slp1
chr3L	15899506	15900006	501	*	2.53	3.28	0.9	2.38	0.0219	0.102	3	3	6.27	6.65	16.13	0.97	1.62	3	+	+	+	+	+	+	pHCl-1
chrX_DS485299v1_random	664	1164	501	*	2.82	3.57	1.19	2.38	0.0221	0.103	2	1	16.73	9.98	8.87	1.95	3.9	1	+	+	-	-	+	-
chr3R	30766948	30767448	501	*	4.77	4.01	5.27	-1.26	0.0227	0.105	1	2	11.15	11.22	25.81	23.39	44.33	48	-	-	+	-	+	+	zfh1
chr2L	19301651	19302151	501	*	5.29	5.86	4.32	1.54	0.0235	0.109	3	3	37.63	20.37	116.16	23.39	6.5	30	+	+	+	+	+	+	CG17564
chrX	5679149	5679649	501	*	3.1	1.71	3.79	-2.08	0.0243	0.112	1	1	6.97	1.25	1.61	9.75	16.72	15	+	-	-	-	+	-	FBgn0003747
chr2R	20111039	20111539	501	*	4.32	3.29	4.92	-1.63	0.0248	0.114	0	2	2.09	7.07	20.17	36.06	39.46	15	-	-	-	+	+	-	18w
chrX	8295567	8296067	501	*	3.77	4.38	2.7	1.68	0.0248	0.114	1	2	9.76	29.93	22.59	5.85	7.63	6	-	+	-	-	+	+	nAChRalpha3
chr2R	12261299	12261799	501	*	4.54	3.57	5.11	-1.54	0.0248	0.114	0	2	2.79	7.07	25.81	43.86	25.66	34	-	-	-	-	+	+	Cam
chr2R	17680183	17680683	501	*	4.37	3.38	4.95	-1.57	0.0253	0.115	0	2	16.73	12.89	1.61	28.27	25.17	39	-	-	-	+	+	-	Sema1b
chrUn_CP007087v1	18833	19333	501	*	5.8	6.34	4.94	1.4	0.0253	0.115	3	3	66.2	32.84	143.59	42.89	12.99	36	+	+	+	+	+	+
chr2R	10485157	10485657	501	*	5.21	4.42	5.72	-1.3	0.0254	0.115	1	3	11.85	10.39	41.95	63.35	48.55	46	-	-	+	+	+	+	pre-lola-G
chrX	6997288	6997788	501	*	5.34	4.71	5.78	-1.07	0.0257	0.116	1	2	20.21	21.2	37.11	53.61	59.43	52	-	-	+	+	+	-	Inx2
chr3R	26796445	26796945	501	*	3.23	1.69	3.96	-2.27	0.0262	0.118	0	2	1.39	7.48	0.81	5.85	16.89	24	-	-	-	-	+	+	Tl
chr2R	8655603	8656103	501	*	5.79	4.33	6.5	-2.17	0.0275	0.124	1	3	17.42	3.33	39.53	131.58	36.37	104	+	-	-	+	+	+	ptc
chrX	5552567	5553067	501	*	3.17	1.62	3.9	-2.28	0.0278	0.125	3	3	5.58	0.42	3.23	18.52	3.25	23	+	+	+	+	+	+	Vsx2
chrX	4082079	4082579	501	*	2.73	3.49	1.03	2.46	0.0279	0.125	2	1	14.63	2.08	16.94	1.95	0.16	4	+	-	+	-	-	+	CG43689
chr2L	11806732	11807232	501	*	3.28	1.94	3.97	-2.02	0.0288	0.129	1	3	6.27	0.42	4.84	10.72	12.18	24	+	-	-	+	+	+	crol
chr2R	12991588	12992088	501	*	3.89	2.63	4.55	-1.92	0.0289	0.129	0	3	0.7	2.49	15.33	15.59	16.56	38	-	-	-	+	+	+	CG33798
chrX	12263863	12264363	501	*	4.17	4.73	3.26	1.47	0.0291	0.129	3	3	25.78	11.64	41.95	9.75	8.93	10	+	+	+	+	+	+	Ten-a
chrX	13549934	13550434	501	*	5.54	6.03	4.79	1.24	0.0292	0.129	3	2	60.63	34.91	100.84	33.14	12.83	37	+	+	+	+	-	+
chr2R	21704528	21705028	501	*	3.31	2.03	3.98	-1.95	0.0292	0.129	0	2	2.79	5.4	4.03	23.39	19.81	4	-	-	-	+	+	-	HmgD
chr3L	4408932	4409432	501	*	4.63	3.91	5.1	-1.19	0.0298	0.131	1	2	12.54	9.14	23.39	25.34	38.65	39	-	-	+	-	+	+	CG15019
chr3R	16934119	16934619	501	*	4.02	2.86	4.65	-1.79	0.03	0.132	3	3	7.67	0.42	13.71	32.16	20.3	23	+	+	+	+	+	+	Abd-B
chr3R	18108712	18109212	501	*	4.37	4.91	3.47	1.44	0.0303	0.133	3	2	47.39	24.52	18.55	20.47	8.77	4	+	+	+	+	+	-	sr
chr3R	7996118	7996618	501	*	5.2	5.67	4.51	1.16	0.0304	0.133	2	3	70.39	33.25	49.21	34.11	12.34	22	+	+	-	+	+	+	ELOVL
chrX	12760483	12760983	501	*	2.92	1.49	3.63	-2.14	0.0306	0.133	0	2	5.58	0.42	2.42	14.62	8.44	14	-	-	-	+	+	-	Paics
chr2R	21364381	21364881	501	*	4.88	4.06	5.4	-1.34	0.0306	0.133	1	3	5.58	12.05	32.27	43.86	28.42	54	-	-	+	+	+	+	cv-2
chr2L	20514012	20514512	501	*	5.81	6.34	4.97	1.38	0.0307	0.133	2	0	151.22	71.08	20.97	34.11	20.62	39	+	+	-	-	-	-	FBgn0267266
chr3R	1815704	1816204	501	*	3.54	2.53	4.13	-1.6	0.0309	0.133	0	2	5.58	3.74	8.07	12.67	21.92	18	-	-	-	+	+	-	Myo81F
chr2R	23463932	23464432	501	*	2.54	3.27	1.01	2.26	0.032	0.138	2	1	16.73	4.99	7.26	2.92	2.11	1	+	-	+	+	-	-	CG43795
chrX	7293871	7294371	501	*	3.69	2.61	4.3	-1.7	0.0323	0.139	0	2	2.79	5.82	9.68	30.22	10.07	19	-	-	-	+	+	-	unc-119
chrY_CP007109v1_random	25704	26204	501	*	2.64	3.37	1.1	2.28	0.0325	0.139	2	0	13.24	3.33	14.52	0.97	2.44	3	+	-	+	-	-	-
chrX_DS484187v1_random	394	894	501	*	4.11	4.71	3.06	1.65	0.0326	0.139	2	1	32.06	30.34	16.13	11.7	12.34	1	-	+	+	-	+	-
chr2L	4222603	4223103	501	*	3.06	1.61	3.77	-2.15	0.0331	0.141	0	2	0.7	0.42	8.07	11.7	13.15	16	-	-	-	-	+	+	ft
chrX	15356371	15356871	501	*	3.02	1.56	3.73	-2.17	0.0332	0.141	1	3	3.48	4.57	0.81	23.39	5.36	11	+	-	-	+	+	+	acj6
chr2L	19323492	19323992	501	*	5.36	4.76	5.78	-1.02	0.0339	0.144	1	2	25.09	21.61	34.69	57.51	67.39	40	+	-	-	+	+	-	FBgn0267264
chr3L	10860630	10861130	501	*	4.44	3.74	4.91	-1.17	0.0341	0.144	0	2	9.06	14.96	16.13	30.22	35.24	25	-	-	-	+	+	-	tna
chr3R	9428019	9428519	501	*	3.12	1.77	3.8	-2.03	0.0342	0.144	1	1	4.18	0.42	5.65	6.82	12.99	22	+	-	-	-	+	-	ps
chr2L	14021830	14022330	501	*	2.74	1.29	3.45	-2.16	0.0345	0.145	1	1	2.09	0.42	4.84	11.7	6.17	15	+	-	-	-	-	+	NimC3
chr2R	7487728	7488228	501	*	4.21	3.14	4.82	-1.68	0.0347	0.145	1	1	1.39	3.33	21.78	25.34	22.57	37	-	-	+	-	+	-	wech
chr2L	3778487	3778987	501	*	2.71	1.18	3.43	-2.25	0.0347	0.145	1	1	5.58	0.42	0.81	12.67	12.67	7	+	-	-	-	+	-	bowl
chrX	13456962	13457462	501	*	2.46	3.2	0.89	2.3	0.035	0.146	2	1	12.54	2.08	12.91	1.95	1.62	2	+	-	+	-	+	-	CG34324
chr2L	19338208	19338708	501	*	4.7	4.07	5.14	-1.06	0.0354	0.148	0	2	14.63	14.13	21.78	38.99	37.67	29	-	-	-	+	+	-	dnt
chr2R	21048101	21048601	501	*	5.91	5.2	6.39	-1.19	0.0357	0.148	2	3	15.33	28.68	66.15	93.57	81.03	77	-	+	+	+	+	+
chr3R	4849023	4849523	501	*	4.89	4.27	5.33	-1.05	0.0366	0.152	1	1	19.51	17.46	20.97	24.37	50.01	46	-	+	-	-	+	-
chrX	18303616	18304116	501	*	5.25	4.55	5.72	-1.16	0.0369	0.152	0	2	12.54	16.63	41.14	70.18	39.46	48	-	-	-	+	+	-
chr3L	19207868	19208368	501	*	4.61	5.13	3.78	1.35	0.037	0.153	3	3	29.27	20.37	55.66	26.32	5.03	10	+	+	+	+	+	+	fz2
chrX	3150553	3151053	501	*	2.85	1.31	3.57	-2.26	0.0379	0.156	0	2	1.39	0.42	5.65	1.95	15.75	18	-	-	-	-	+	+	N
chr3L	4252917	4253417	501	*	4.84	2.85	5.64	-2.79	0.0386	0.158	0	2	0.7	0.83	20.17	43.86	37.18	69	-	-	-	-	+	+	CG1265
chr3L	5634169	5634669	501	*	4.76	3.89	5.3	-1.41	0.0387	0.158	0	2	7.67	5.4	31.46	44.84	18.35	55	-	-	-	-	+	+	Blimp-1
chr2R	9548039	9548539	501	*	4.25	3.35	4.8	-1.45	0.0388	0.159	1	2	8.36	2.91	19.36	34.11	17.7	32	-	-	+	-	+	+	CG1888
chrX	1955342	1955842	501	*	4.97	5.46	4.24	1.22	0.039	0.159	2	3	45.99	20.78	65.34	29.24	8.28	19	+	-	+	+	+	+	Hr4
chr2R	13569888	13570388	501	*	5.19	4.53	5.64	-1.1	0.0395	0.16	1	2	15.33	30.76	23.39	35.09	78.1	36	-	-	+	+	+	-
chr2L	5000184	5000684	501	*	4.5	3.59	5.06	-1.46	0.0398	0.161	0	2	2.09	6.65	27.43	29.24	44.49	26	-	-	-	+	+	-	Rtnl1
chrX	8271192	8271692	501	*	4.78	4.13	5.22	-1.09	0.0401	0.162	0	3	12.54	12.47	27.43	45.81	37.18	29	-	-	-	+	+	+	CG1632
chr3L	14076600	14077100	501	*	4.77	3.9	5.31	-1.41	0.0401	0.162	0	2	2.09	12.89	29.85	38.01	27.93	53	-	-	-	-	+	+	btl
chr3L	15619613	15620113	501	*	3.77	2.84	4.33	-1.49	0.0404	0.162	0	2	10.45	6.23	4.84	17.54	14.78	28	-	-	-	-	+	+	CG7372
chr3L	5881270	5881770	501	*	2.5	1.05	3.2	-2.15	0.0409	0.164	1	1	4.18	0.42	1.61	11.7	8.93	7	+	-	-	-	+	-	CG13287
chr2L	14518189	14518689	501	*	4.4	4.91	3.62	1.29	0.041	0.164	3	2	45.3	30.34	14.52	16.57	13.31	7	+	+	+	+	+	-	FBgn0011862
chr3R	24071904	24072404	501	*	4.66	5.15	3.91	1.24	0.041	0.164	3	3	29.27	14.96	62.11	15.59	11.37	18	+	+	+	+	+	+	eIF4EHP
chr2L	19790958	19791458	501	*	4.51	3.8	4.98	-1.17	0.0412	0.164	2	3	12.54	8.31	20.97	37.04	22.41	35	+	-	+	+	+	+	CdGAPr
chr2R	19857775	19858275	501	*	4.17	3.37	4.69	-1.32	0.0417	0.165	0	2	4.88	9.14	16.94	31.19	23.06	23	-	-	-	+	+	-	FBgn0265764
chrX	12559032	12559532	501	*	2.6	3.3	1.19	2.11	0.0417	0.165	1	1	9.76	3.74	16.13	4.87	0.97	1	+	-	-	-	+	-	hwt
chr3R	11953912	11954412	501	*	2.5	0.9	3.24	-2.34	0.0419	0.166	0	3	0.7	2.49	2.42	0.97	16.4	11	-	-	-	+	+	+	Hsp70Ab
chr2L	19816058	19816558	501	*	4.03	3.16	4.57	-1.41	0.0428	0.168	2	3	9.06	12.89	4.84	14.62	36.7	20	+	+	-	+	+	+	FBgn0003922
chr2L	1410967	1411467	501	*	5.82	5.17	6.27	-1.1	0.0428	0.168	3	3	18.82	34.5	54.85	94.54	89.14	48	+	+	+	+	+	+	robo2
chr3L	16183917	16184417	501	*	5.1	5.57	4.4	1.17	0.0429	0.168	3	3	39.03	22.45	81.47	25.34	12.02	26	+	+	+	+	+	+
chrX	6988577	6989077	501	*	3.96	3.1	4.49	-1.39	0.043	0.169	1	2	4.18	7.9	13.71	16.57	31.01	20	+	-	-	+	+	-	ogre
chr3L	3096035	3096535	501	*	3.5	2.32	4.14	-1.83	0.0431	0.169	2	3	4.18	9.98	0.81	16.57	26.47	10	+	+	-	+	+	+	Cht7
chr3R	11351799	11352299	501	*	6.95	5.94	7.53	-1.59	0.0435	0.17	3	3	16.73	16.21	151.66	219.3	95.64	240	+	+	+	+	+	+	pros
chr3R	14679909	14680409	501	*	4.4	3.54	4.94	-1.4	0.0437	0.17	0	2	2.09	18.29	14.52	21.44	31.66	39	-	-	-	-	+	+	Meltrin
chr2L	246608	247108	501	*	4.07	2.22	4.86	-2.63	0.0441	0.171	0	2	0.7	0.42	12.91	27.29	19.65	40	-	-	-	-	+	+	FBgn0265149
chr3R	16029474	16029974	501	*	4.13	3.32	4.64	-1.32	0.0446	0.172	1	1	16.03	6.65	7.26	28.27	17.7	29	+	-	-	-	+	-	pnr
chr3L	3038010	3038510	501	*	4.7	4.02	5.15	-1.13	0.0447	0.172	0	2	17.42	9.56	21.78	46.78	41.89	18	-	-	-	+	+	-	CG2162
chr2L	7526134	7526634	501	*	3.4	2.3	4.01	-1.71	0.0448	0.172	0	2	1.39	3.74	9.68	17.54	21.76	9	-	-	-	+	+	-	RapGAP1
chrX	16839882	16840382	501	*	5.09	4.54	5.49	-0.95	0.0448	0.172	1	3	20.21	20.37	29.04	38.01	51.47	45	-	-	+	+	+	+	RSG7
chr2L	4811605	4812105	501	*	4.34	3.57	4.84	-1.27	0.0452	0.173	1	3	5.58	8.31	21.78	24.37	24.84	37	+	-	-	+	+	+	CG15629
chr2L	11445485	11445985	501	*	5.27	3.85	5.97	-2.13	0.0456	0.174	0	2	1.39	7.9	33.88	81.87	54.56	52	-	-	-	+	+	-	salm
chr2R	15847875	15848375	501	*	5.58	5.02	5.98	-0.96	0.0458	0.175	2	2	36.94	34.91	25.81	65.3	78.26	46	+	+	-	+	+	-	CG8249
chr2R	21579630	21580130	501	*	4.72	4.01	5.2	-1.19	0.0459	0.175	0	2	5.58	12.89	29.85	35.09	34.26	41	-	-	-	+	+	-
chrX	3718621	3719121	501	*	3.93	3.04	4.48	-1.44	0.046	0.175	1	3	7.67	4.99	12.1	37.04	13.96	16	+	-	-	+	+	+	Rala
chr2L	12055703	12056203	501	*	2.55	1.12	3.25	-2.13	0.047	0.178	1	1	4.88	0.83	0.81	10.72	13.8	4	+	-	-	-	+	-	JhI-21
chr3R	3701914	3702414	501	*	4.54	5.05	3.75	1.29	0.0482	0.182	3	3	34.15	13.3	51.63	15.59	4.87	20	+	+	+	+	+	+
chrX	6643766	6644266	501	*	3.46	4.09	2.31	1.78	0.0484	0.182	2	3	25.09	3.33	22.59	8.77	2.11	4	+	-	+	+	+	+	pigs
chrX	10731368	10731868	501	*	4.74	4.12	5.18	-1.06	0.0487	0.183	3	3	17.42	11.22	23.39	34.11	26.47	48	+	+	+	+	+	+	stx
chr3L	11246101	11246601	501	*	4.24	3.26	4.82	-1.55	0.0492	0.185	2	2	11.85	0.83	16.13	19.49	20.13	45	+	-	+	-	+	+	FBgn0265924
chr3R	21556986	21557486	501	*	3.73	2.55	4.36	-1.81	0.0504	0.189	0	2	3.48	0.42	13.71	35.09	16.72	10	-	-	-	+	+	-	slou
chrX	2652884	2653384	501	*	5.48	5.97	4.75	1.22	0.0509	0.19	2	3	54.36	22.03	111.32	38.01	12.5	30	+	-	+	+	+	+	sgg
chr3R	18428822	18429322	501	*	3.04	1.31	3.81	-2.5	0.0511	0.19	3	3	2.09	2.91	2.42	4.87	0.16	37	+	+	+	+	+	+	fru
chrX	6725032	6725532	501	*	4.47	3.75	4.95	-1.2	0.0512	0.19	0	2	15.33	17.04	8.07	20.47	23.38	49	-	-	-	-	+	+	CG3168
chr2R	14107499	14107999	501	*	5.09	5.56	4.39	1.17	0.0513	0.19	3	3	32.75	27.02	81.47	15.59	11.37	36	+	+	+	+	+	+	Prosap
chrX_DS484497v1_random	1193	1693	501	*	5.54	6.02	4.82	1.2	0.0519	0.192	2	2	49.48	27.02	118.58	36.06	12.83	36	+	-	+	+	-	+
chr3R	31291045	31291545	501	*	2.62	3.32	1.24	2.08	0.0526	0.194	3	3	8.36	4.57	16.94	2.92	0.16	4	+	+	+	+	+	+
chrX	17511923	17512423	501	*	6.32	6.79	5.62	1.17	0.0527	0.194	3	3	100.35	55.28	176.66	57.51	21.27	69	+	+	+	+	+	+	CG43658
chr3R	8131955	8132455	501	*	4.87	5.35	4.15	1.21	0.0527	0.194	2	1	43.9	18.29	60.5	25.34	5.85	22	+	-	+	-	-	+
chr2L	597705	598205	501	*	3.99	3.14	4.52	-1.38	0.0533	0.196	0	2	4.88	6.23	15.33	15.59	18.02	35	-	-	-	-	+	+
chr3L	16052054	16052554	501	*	2.54	1.05	3.26	-2.21	0.0547	0.2	1	1	2.09	3.33	0.81	12.67	15.1	1	+	-	-	-	+	-	Mbs
chr3L	13957412	13957912	501	*	3.26	3.95	1.92	2.02	0.0555	0.203	3	3	13.94	0.83	31.46	2.92	1.46	7	+	+	+	+	+	+	CG32137
chr3R	6863733	6864233	501	*	5.22	4.66	5.62	-0.95	0.0558	0.203	1	1	16.03	24.52	35.49	52.63	56.51	38	-	+	-	-	+	-	ftz
chr3R	1244051	1244551	501	*	2.65	3.3	1.43	1.87	0.0558	0.203	2	0	5.58	7.07	16.94	1.95	1.14	5	+	-	+	-	-	-	Myo81F
chr3R	7730647	7731147	501	*	4.79	5.32	3.96	1.36	0.0559	0.203	2	2	33.45	9.56	76.63	25.34	5.2	16	+	-	+	+	-	+
chr3R	15131731	15132231	501	*	4.26	3.6	4.71	-1.11	0.0562	0.204	0	2	12.54	14.13	9.68	22.42	31.18	25	-	-	-	+	+	-	CG42788
chr2L	15333279	15333779	501	*	4.97	4.39	5.38	-1	0.0576	0.208	0	3	11.15	26.6	25.01	32.16	50.01	43	-	-	-	+	+	+	esg
chr3R	16771939	16772439	501	*	4.35	3.67	4.82	-1.14	0.0585	0.211	0	2	7.67	11.22	19.36	38.99	24.52	21	-	-	-	+	+	-	FBgn0020556
chr3R	31725453	31725953	501	*	4.23	3.54	4.69	-1.16	0.0594	0.214	1	1	9.06	10.39	15.33	34.11	28.42	15	+	-	-	-	+	-	ttk
chrX	7175254	7175754	501	*	6.46	6.91	5.8	1.11	0.0597	0.214	3	3	112.9	65.67	181.5	72.13	24.52	70	+	+	+	+	+	+	CG9650
chr2L	713437	713937	501	*	3.08	1.85	3.73	-1.88	0.0598	0.214	0	3	0.7	2.08	8.07	3.9	13.96	22	-	-	-	+	+	+	FBgn0266323
chr2R	22802880	22803380	501	*	5.28	4.71	5.68	-0.97	0.0606	0.217	2	2	13.24	30.76	34.69	58.48	48.39	47	-	+	+	+	+	-
chr3L	16025160	16025660	501	*	5.53	5.01	5.92	-0.91	0.0607	0.217	3	2	33.45	27.43	35.49	83.82	52.61	45	+	+	+	+	+	-	Notum
chr2R	16102491	16102991	501	*	4.05	3.24	4.57	-1.33	0.0611	0.217	0	2	2.79	7.9	17.75	19.49	26.79	25	-	-	-	+	+	-	Rho1
chr2R	7737001	7737501	501	*	2.55	3.27	1.01	2.27	0.0621	0.22	3	3	18.82	3.74	6.45	0.97	4.06	1	+	+	+	+	+	+	Gdap2
chr2R	21331064	21331564	501	*	5.61	6.07	4.93	1.13	0.0626	0.222	3	3	69.69	33.25	98.42	31.19	10.55	50	+	+	+	+	+	+	dom
chr3R	9224633	9225133	501	*	5.1	5.55	4.45	1.1	0.0628	0.222	3	3	42.51	22.86	75.02	26.32	9.26	30	+	+	+	+	+	+	pum
chrX	2616204	2616704	501	*	3.24	3.81	2.27	1.54	0.0636	0.224	2	2	13.24	7.07	21.78	5.85	2.6	6	+	-	+	-	+	+
chr3L	27615041	27615541	501	*	6.81	7.27	6.11	1.17	0.0636	0.224	3	3	170.74	75.23	218.61	88.7	25.17	93	+	+	+	+	+	+
chr2R	18358213	18358713	501	*	6.48	6.95	5.79	1.16	0.0643	0.226	3	3	103.14	57.78	209.74	54.58	23.87	87	+	+	+	+	+	+	sbb
chr2R	13194786	13195286	501	*	2.69	1.34	3.38	-2.03	0.0651	0.228	3	2	0.7	2.08	4.84	15.59	14.61	1	+	+	+	+	+	-	Kdm4B
chrX	5090406	5090906	501	*	3.5	4.07	2.55	1.52	0.0665	0.232	2	0	14.63	5.82	29.85	5.85	4.71	7	+	-	+	-	-	-	CG15465
chrX	847420	847920	501	*	4.13	4.64	3.33	1.31	0.0667	0.233	1	1	20.21	13.3	41.14	18.52	6.66	5	+	-	-	+	-	-	CG3713
chr3L	21471826	21472326	501	*	2.47	1.17	3.15	-1.98	0.0676	0.234	1	2	0.7	0.42	5.65	7.8	7.79	11	+	-	-	-	+	+
chr2L	21618673	21619173	501	*	5.03	4.48	5.43	-0.95	0.0676	0.234	0	3	11.85	22.03	33.07	35.09	53.42	41	-	-	-	+	+	+	CG2201
chrY	742939	743439	501	*	4.86	5.32	4.18	1.14	0.0678	0.234	3	3	23	24.94	71.79	28.27	6.98	19	+	+	+	+	+	+
chrX	11784123	11784623	501	*	4.94	5.39	4.27	1.12	0.0678	0.234	2	3	37.63	21.2	66.95	24.37	6.66	27	+	-	+	+	+	+	Karl
chr3L	13211131	13211631	501	*	5.68	6.11	5.07	1.04	0.0679	0.234	2	2	120.56	47.38	39.53	41.91	19.16	40	+	+	-	-	+	+	FBgn0052126
chrX	2546933	2547433	501	*	3.22	3.81	2.19	1.62	0.0681	0.234	2	0	13.24	6.23	22.59	1.95	3.73	8	+	-	+	-	-	-	FBgn0263531
chr2L	11210327	11210827	501	*	4.56	3.93	5	-1.06	0.0682	0.234	1	3	12.54	7.48	25.81	30.22	26.47	39	-	+	-	+	+	+	ab
chr3R	28861282	28861782	501	*	4.59	4.02	4.99	-0.97	0.0682	0.234	1	3	13.24	13.72	21.78	31.19	26.3	38	+	-	-	+	+	+	spg
chr2R	5392661	5393161	501	*	4.53	5.01	3.82	1.19	0.0683	0.234	3	3	32.06	12.05	52.43	16.57	5.68	20	+	+	+	+	+	+
chrX	17830511	17831011	501	*	4.78	4.19	5.21	-1.02	0.0691	0.236	1	2	9.06	13.3	32.27	41.91	36.86	32	-	-	+	+	+	-	Socs16D
chr2R	21545150	21545650	501	*	5.22	4.59	5.66	-1.07	0.0693	0.236	0	3	6.97	24.11	41.14	58.48	52.77	40	-	-	-	+	+	+	Egfr
chr3L	19446525	19447025	501	*	3.46	2.42	4.05	-1.63	0.0703	0.239	1	2	9.06	5.4	1.61	3.9	21.92	24	+	-	-	-	+	+	Chd3
chr3L	18717079	18717579	501	*	3.4	4.01	2.31	1.7	0.0704	0.239	2	3	9.06	4.57	34.69	2.92	1.95	10	+	-	+	+	+	+
chr3R	4348299	4348799	501	*	5.15	4.65	5.52	-0.86	0.0707	0.239	1	2	20.91	31.17	23.39	43.86	52.45	41	-	+	-	+	+	-	hkb
chr2L	18014101	18014601	501	*	7.09	7.56	6.39	1.17	0.0707	0.239	3	3	192.34	74.4	298.47	105.27	36.53	109	+	+	+	+	+	+	elfless
chr3L	13378261	13378761	501	*	5.42	4.9	5.8	-0.89	0.0713	0.241	1	3	20.91	25.35	43.56	64.33	47.41	55	-	-	+	+	+	+	SNCF
chr3L	21047715	21048215	501	*	2.79	1.6	3.44	-1.84	0.0716	0.241	2	3	1.39	0.42	7.26	11.7	8.77	12	+	-	+	+	+	+	siz
chrY	2728115	2728615	501	*	6.97	7.42	6.31	1.11	0.0721	0.242	3	3	175.62	86.87	250.88	105.27	33.29	99	+	+	+	+	+	+
chr2L	5907253	5907753	501	*	3.76	2.75	4.35	-1.6	0.0727	0.244	0	2	0.7	2.49	16.94	14.62	18.35	28	-	-	-	-	+	+	CG9021
chrX	9519050	9519550	501	*	7.73	8.22	6.99	1.22	0.0729	0.244	3	3	267.61	123.03	502.56	156.92	53.75	172	+	+	+	+	+	+	CG32700
chr3R	17617531	17618031	501	*	5.84	6.25	5.28	0.97	0.073	0.244	2	2	120.56	68.58	38.72	47.76	27.6	41	+	+	-	+	+	-	FBgn0011944
chr2R	7240641	7241141	501	*	3.62	4.16	2.74	1.41	0.0737	0.246	3	3	8.36	13.72	31.46	5.85	3.25	11	+	+	+	+	+	+
chrX	3060453	3060953	501	*	3.48	4.07	2.46	1.62	0.0741	0.247	2	0	16.03	6.23	28.23	12.67	1.79	2	+	-	+	-	-	-	kirre
chr3R	30851819	30852319	501	*	5.56	5.02	5.96	-0.93	0.0749	0.249	2	2	16.03	31.59	50.01	56.53	75.83	54	-	+	+	+	+	-	tll
chrY_DS485927v1_random	-28	472	501	*	3.73	4.38	2.5	1.89	0.0757	0.251	1	1	9.76	41.57	11.29	0.97	14.94	1	-	+	-	-	+	-
chrX	13257015	13257515	501	*	4.62	3.96	5.07	-1.11	0.076	0.251	0	2	11.85	14.55	20.17	10.72	62.84	27	-	-	-	-	+	+	comt
chr2L	14889769	14890269	501	*	3.09	3.73	1.94	1.78	0.0761	0.251	3	3	9.76	3.33	26.62	3.9	0.65	7	+	+	+	+	+	+
chr3R	4174948	4175448	501	*	3.98	2.95	4.58	-1.63	0.0763	0.251	0	2	4.18	0.42	18.55	41.91	19.81	10	-	-	-	+	+	-	CG12581
chr2L	18782774	18783274	501	*	4.25	3.61	4.7	-1.09	0.0771	0.253	0	2	17.42	6.23	12.91	28.27	32.64	17	-	-	-	+	+	-	ham
chrX	11277680	11278180	501	*	5.88	6.32	5.25	1.07	0.0772	0.253	2	3	91.29	35.33	112.94	49.71	14.29	50	+	-	+	+	+	+	CG44422
chrX_DS485050v1_random	673	1173	501	*	4.55	4.96	3.96	1	0.0776	0.254	3	1	33.45	39.07	20.97	8.77	16.08	22	+	+	+	-	+	-
chrX	3448897	3449397	501	*	3.17	2.13	3.77	-1.64	0.0788	0.257	1	2	4.18	1.66	7.26	2.92	15.91	22	+	-	-	-	+	+	CG12535
chrX	11578699	11579199	501	*	8.03	8.52	7.27	1.26	0.0791	0.257	2	3	659.95	340.01	102.45	238.8	113.01	110	+	+	-	+	+	+	e(y)2
chrX	160067	160567	501	*	3.83	4.4	2.9	1.5	0.0792	0.257	2	0	10.45	12.47	40.33	4.87	1.46	16	+	-	+	-	-	-	tyn
chr2R	22864014	22864514	501	*	4.22	4.73	3.42	1.31	0.0793	0.257	3	3	33.45	9.14	37.11	3.9	6.17	22	+	+	+	+	+	+
chrX	17821423	17821923	501	*	4.46	4.95	3.71	1.24	0.0797	0.257	2	3	43.21	5.82	43.56	17.54	7.63	14	+	-	+	+	+	+	CG12986
chrX	18309298	18309798	501	*	6.07	5.56	6.44	-0.89	0.0797	0.257	2	2	33.45	36.16	71.79	94.54	94.66	72	-	+	+	+	+	-	upd1
chr2R	6194114	6194614	501	*	3.54	2.54	4.12	-1.57	0.0797	0.257	1	1	1.39	12.89	3.23	15.59	24.52	12	-	+	-	-	+	-	Ptr
chrX	16500490	16500990	501	*	6.96	7.42	6.29	1.13	0.0804	0.259	3	3	173.53	73.16	267.01	105.27	29.71	99	+	+	+	+	+	+	para
chr2L	16422659	16423159	501	*	4.9	3.16	5.66	-2.5	0.0806	0.259	1	3	1.39	0.42	25.01	46.78	33.94	71	-	-	+	+	+	+	CG5888
chr2R	8572490	8572990	501	*	3.35	2.43	3.91	-1.48	0.0808	0.259	0	2	6.27	8.31	1.61	13.65	16.4	15	-	-	-	+	+	-
chr3L	15250399	15250899	501	*	5.56	6.01	4.9	1.11	0.0812	0.26	3	3	62.72	28.26	102.45	46.78	8.61	34	+	+	+	+	+	+
chr2R	11710089	11710589	501	*	4.91	4.31	5.34	-1.03	0.0813	0.26	1	1	18.12	22.03	19.36	15.59	76.8	29	-	+	-	-	+	-	pyr
chrX	21407897	21408397	501	*	2.95	3.6	1.73	1.88	0.0814	0.26	2	0	19.51	1.66	15.33	0.97	0.97	8	+	-	+	-	-	-
chr2L	2731057	2731557	501	*	4.96	5.41	4.29	1.11	0.0817	0.26	1	2	35.54	19.12	72.6	36.06	7.79	15	+	-	-	+	+	-	CG31689
chr2R	2949134	2949634	501	*	4.14	4.62	3.42	1.21	0.0822	0.261	2	3	16.03	17.46	40.33	19.49	5.52	7	+	-	+	+	+	+	Scp1
chrX	9765384	9765884	501	*	6.01	6.42	5.43	0.99	0.0823	0.261	3	3	74.57	43.64	138.75	44.84	24.19	60	+	+	+	+	+	+
chrUn_CP007087v1	25333	25833	501	*	7.02	7.46	6.37	1.08	0.0831	0.262	3	3	141.47	91.86	294.44	108.19	37.67	103	+	+	+	+	+	+
chrX	17832220	17832720	501	*	3.59	2.7	4.14	-1.43	0.0832	0.262	0	2	5.58	8.31	5.65	31.19	16.56	5	-	-	-	+	+	-	CG6398
chrX	12460011	12460511	501	*	3.69	4.2	2.9	1.3	0.0833	0.262	1	2	26.48	10.81	17.75	9.75	2.6	10	+	-	-	+	-	+	CG15731
chr2R	11892686	11893186	501	*	3.68	2.93	4.17	-1.24	0.0834	0.262	0	2	7.67	7.07	8.07	22.42	22.57	9	-	-	-	+	+	-	FBgn0015543
chrX	12723403	12723903	501	*	2.79	1.56	3.44	-1.88	0.0834	0.262	3	3	2.79	0.42	5.65	6.82	3.73	22	+	+	+	+	+	+	FBgn0264678
chrX	3295827	3296327	501	*	5.51	5.95	4.85	1.1	0.0837	0.262	3	1	66.9	24.52	94.38	38.01	8.77	40	+	+	+	-	-	+	dnc
chrX	10315997	10316497	501	*	4.2	4.65	3.52	1.13	0.0838	0.262	3	3	23.69	19.54	32.27	8.77	4.71	21	+	+	+	+	+	+	alpha-Man-Ia
chrX	8165956	8166456	501	*	2.43	3.12	1.07	2.05	0.0843	0.263	3	2	6.27	1.25	18.55	0.97	0.32	5	+	+	+	-	+	+	Or7a
chrX	395680	396180	501	*	4.63	4.04	5.05	-1.01	0.0845	0.263	1	2	16.03	22.86	10.49	36.06	47.25	16	-	+	-	+	+	-	sc
chr3R	18423244	18423744	501	*	3.16	1.98	3.8	-1.81	0.0851	0.264	1	2	4.88	4.57	2.42	20.47	1.3	20	+	-	-	+	-	+	fru
chr2L	12507562	12508062	501	*	3.51	2.48	4.1	-1.62	0.0851	0.264	1	2	9.06	0.42	7.26	14.62	7.79	29	+	-	-	+	+	-	bun
chr3L	19994866	19995366	501	*	3.89	4.43	3.01	1.42	0.0851	0.264	2	1	13.94	14.55	36.3	5.85	1.3	17	+	-	+	-	-	+	Nca
chr3L	2349711	2350211	501	*	5.97	6.41	5.34	1.07	0.0855	0.264	3	3	68.3	34.08	152.46	51.66	18.84	51	+	+	+	+	+	+
chr3L	391736	392236	501	*	3.08	3.68	2.02	1.66	0.0858	0.265	2	1	12.54	5.82	20.17	9.75	1.46	1	+	-	+	+	-	-	trh
chr3R	24006137	24006637	501	*	5.25	5.66	4.67	0.99	0.0859	0.265	3	3	43.21	27.02	81.47	33.14	11.04	32	+	+	+	+	+	+	KrT95D
chr3L	21880373	21880873	501	*	3.1	1.97	3.73	-1.76	0.0865	0.266	1	3	0.7	4.57	6.45	9.75	28.09	2	+	-	-	+	+	+	mub
chr3L	19771095	19771595	501	*	2.8	3.4	1.74	1.66	0.0866	0.266	3	3	11.85	2.91	16.94	3.9	2.11	4	+	+	+	+	+	+	CG42637
chr3L	10776888	10777388	501	*	4.47	4.93	3.8	1.12	0.0873	0.267	2	0	36.24	20.37	34.69	26.32	3.57	12	+	-	+	-	-	-
chr2R	13563648	13564148	501	*	5.45	4.85	5.88	-1.03	0.0881	0.269	1	2	11.85	32.84	41.95	77	76.48	23	-	-	+	+	+	-
chrUn_DS484170v1	52	552	501	*	5.36	5.77	4.78	0.99	0.0882	0.269	2	3	48.09	29.93	85.51	44.84	12.34	25	+	-	+	+	+	+
chr3R	18548586	18549086	501	*	3.72	2.9	4.23	-1.33	0.0886	0.27	1	3	4.18	4.57	13.71	16.57	10.88	29	+	-	-	+	+	+	fru
chrX	2919402	2919902	501	*	4.8	5.23	4.18	1.06	0.089	0.271	2	2	34.15	14.13	64.53	21.44	8.77	24	+	-	+	+	-	+	CG3588
chr3R	24493217	24493717	501	*	3.55	4.08	2.71	1.37	0.0919	0.279	3	3	23	5.82	21.78	4.87	3.73	11	+	+	+	+	+	+
chr2L	12236984	12237484	501	*	6.86	7.27	6.28	0.99	0.0939	0.284	3	3	137.98	90.61	233.94	105.27	38	90	+	+	+	+	+	+	bru1
chr2R	7486180	7486680	501	*	5.56	5.1	5.91	-0.81	0.094	0.284	2	3	23.69	32.42	46.79	60.43	72.26	48	-	+	+	+	+	+	wech
chr2L	13244479	13244979	501	*	3.14	2.12	3.73	-1.62	0.0941	0.284	1	2	0.7	7.48	4.84	5.85	23.06	11	+	-	-	-	+	+	FBgn0003935
chr3R	9030007	9030507	501	*	4.45	3.83	4.88	-1.05	0.095	0.286	1	2	4.88	12.89	25.01	37.04	28.42	23	-	-	+	+	+	-	neur
chrY_DS484094v1_random	660	1160	501	*	3.82	4.35	2.95	1.41	0.0952	0.286	2	1	18.12	28.68	14.52	0.97	13.15	9	+	+	-	-	+	-
chr3L	11356847	11357347	501	*	3.75	2.96	4.26	-1.3	0.0956	0.286	1	2	4.18	6.23	12.91	10.72	12.83	34	-	-	+	-	+	+
chr2L	21441852	21442352	501	*	3.76	4.28	2.93	1.35	0.0957	0.286	2	3	16.73	6.23	35.49	6.82	3.09	13	+	-	+	+	+	+	His4r
chrX	14201816	14202316	501	*	3.11	3.7	2.11	1.59	0.0959	0.286	2	2	19.51	2.49	16.94	7.8	2.11	3	+	-	+	+	-	+	l(1)G0007
chr3L	9678187	9678687	501	*	3.11	2.1	3.7	-1.6	0.096	0.286	0	2	2.79	0.42	9.68	15.59	12.34	11	-	-	-	-	+	+	fry
chr2R	10584200	10584700	501	*	4.34	3.55	4.84	-1.29	0.096	0.286	0	2	6.97	1.66	26.62	29.24	17.86	39	-	-	-	-	+	+	psq
chrX	8922496	8922996	501	*	5.25	5.68	4.63	1.04	0.0968	0.288	3	3	39.72	17.87	96	28.27	12.18	34	+	+	+	+	+	+	CG12661
chr3L	19556574	19557074	501	*	5.52	5.04	5.88	-0.84	0.097	0.288	1	2	32.06	23.69	42.75	78.95	62.51	35	-	-	+	+	+	-	FBgn0265888
chr3L	13234598	13235098	501	*	4.45	4.93	3.73	1.2	0.0983	0.291	3	3	27.18	12.89	51.63	21.44	2.44	16	+	+	+	+	+	+	caps
chrX	6868716	6869216	501	*	2.81	1.88	3.37	-1.49	0.0984	0.291	0	3	4.88	2.91	3.23	10.72	8.28	12	-	-	-	+	+	+	CG14434
chr2L	13211652	13212152	501	*	3.59	2.67	4.15	-1.48	0.0984	0.291	2	2	6.27	9.56	3.23	2.92	19.16	31	+	+	-	-	+	+	FBgn0004191
chr2R	17309151	17309651	501	*	3.25	3.8	2.36	1.44	0.0986	0.291	2	0	15.33	4.57	21.78	7.8	3.57	4	+	-	+	-	-	-	FBgn0263709
chr2L	2037729	2038229	501	*	4.64	4.02	5.07	-1.05	0.0989	0.291	0	2	10.45	9.14	29.04	51.66	16.89	32	-	-	-	+	+	-	Su(dx)
chrX	13994807	13995307	501	*	5.06	3.85	5.71	-1.86	0.0994	0.292	0	3	0.7	10.39	32.27	48.73	47.41	61	-	-	-	+	+	+	ben
chrUn_DS484904v1	1002	1502	501	*	2.84	3.42	1.87	1.55	0.0999	0.292	2	2	6.97	4.99	20.17	4.87	2.11	4	+	-	+	+	-	+
chrX	5447282	5447782	501	*	4.37	4.87	3.6	1.27	0.0999	0.292	3	1	16.03	15.79	55.66	22.42	1.95	12	+	+	+	-	-	+	SPR
chr2R	13560728	13561228	501	*	4.58	4.01	4.98	-0.97	0.1	0.293	0	2	8.36	14.96	25.01	33.14	45.63	16	-	-	-	+	+	-	CG13334
chrX	9743965	9744465	501	*	3.96	3.22	4.45	-1.23	0.1	0.293	1	2	10.45	3.74	13.71	38.99	13.64	13	+	-	-	+	+	-	Sp1
chr3R	7552381	7552881	501	*	2.88	3.55	1.59	1.96	0.101	0.294	3	3	6.97	0.83	27.43	4.87	0.16	4	+	+	+	+	+	+	CG45545
chrX	7296836	7297336	501	*	4.6	4.05	4.99	-0.95	0.102	0.297	1	1	6.97	23.28	19.36	28.27	33.29	34	-	+	-	-	+	-	CG1677
chrUn_CP007087v1	38085	38585	501	*	5.72	6.13	5.14	0.99	0.102	0.297	3	3	59.24	33.67	116.97	48.73	14.13	43	+	+	+	+	+	+
chr2R	6190030	6190530	501	*	3.43	2.64	3.93	-1.29	0.103	0.297	1	1	6.97	2.91	8.87	20.47	17.37	8	+	-	-	-	+	-	FBgn0011934
chrX	4955534	4956034	501	*	4.59	5	4.02	0.97	0.103	0.297	2	3	42.51	24.94	28.23	26.32	5.52	17	+	+	-	+	+	+	Ptp4E
chr2L	19324720	19325220	501	*	3.81	2.92	4.36	-1.44	0.103	0.298	0	2	0.7	6.65	15.33	13.65	11.04	37	-	-	-	+	-	+	FBgn0266796
chr3R	13403061	13403561	501	*	5.66	5.23	5.99	-0.77	0.104	0.298	2	2	48.78	33.67	29.85	56.53	73.56	61	+	+	-	+	+	-	GILT1
chrX	2558981	2559955	975	*	7.68	8.12	7.04	1.08	0.104	0.298	3	3	269	135.92	429.96	155.95	52.61	187	+	+	+	+	+	+	Pdfr
chr3L	25196152	25196652	501	*	4.59	5.01	3.99	1.03	0.104	0.299	0	3	32.75	11.64	52.43	23.39	12.18	12	-	-	-	+	+	+
chr2L	15762307	15762807	501	*	3.48	2.68	3.99	-1.31	0.105	0.299	0	2	4.88	8.73	5.65	8.77	13.8	25	-	-	-	-	+	+	Gli
chrX	3358163	3358663	501	*	6.37	6.78	5.79	0.98	0.106	0.302	3	3	99.66	53.62	175.86	74.08	23.38	69	+	+	+	+	+	+
chr2R	9493724	9494224	501	*	3.3	2.38	3.85	-1.47	0.106	0.302	1	1	4.18	5.82	5.65	2.92	31.34	9	-	+	-	-	+	-	Wnt2
chr3R	26023206	26023706	501	*	5.13	4.67	5.48	-0.82	0.107	0.304	2	2	23.69	26.6	25.81	24.37	64.79	45	-	+	+	-	+	+	E(spl)m4-BFM
chrUn_CP007087v1	32016	32516	501	*	7.02	7.45	6.42	1.02	0.108	0.306	3	3	149.83	87.7	285.57	107.22	35.24	115	+	+	+	+	+	+
chr3R	6405659	6406159	501	*	3.54	2.74	4.05	-1.31	0.108	0.306	0	2	4.88	8.73	6.45	4.87	19.97	25	-	-	-	-	+	+	Dmtn
chr2R	15897900	15898400	501	*	5.06	4.55	5.43	-0.88	0.108	0.306	1	1	14.63	16.21	39.53	48.73	30.04	51	-	-	+	-	+	-	CG33463
chr2L	15478090	15478590	501	*	5.37	4.95	5.7	-0.75	0.108	0.306	1	3	25.09	30.34	37.11	46.78	49.85	59	-	+	-	+	+	+	sna
chr2R	18307034	18307534	501	*	4.82	4.2	5.26	-1.05	0.109	0.307	1	2	6.97	10.39	37.91	50.68	19.97	44	-	-	+	-	+	+	sbb
chrX	8533788	8534288	501	*	4.02	3.4	4.45	-1.05	0.109	0.307	1	3	12.54	5.4	13.71	28.27	20.46	17	+	-	-	+	+	+	Nrg
chr2L	2861287	2861787	501	*	6.14	6.56	5.53	1.03	0.11	0.309	3	3	71.78	40.32	171.02	57.51	17.21	64	+	+	+	+	+	+	CG2991
chr3L	21749127	21749627	501	*	4.69	5.12	4.09	1.02	0.112	0.315	2	3	34.84	12.05	57.27	23.39	6.82	21	+	-	+	+	+	+	Syn1
chr2R	8232158	8232658	501	*	5.39	4.96	5.72	-0.76	0.112	0.315	2	1	28.57	32.01	33.07	47.76	73.88	37	-	+	+	-	+	-	dpn
chr3R	30740193	30740693	501	*	3.58	4.08	2.83	1.25	0.115	0.32	3	2	13.24	9.98	27.43	12.67	2.6	6	+	+	+	+	-	+	CG15543
chr2R	11604354	11604854	501	*	3.66	2.92	4.15	-1.23	0.115	0.32	1	2	12.54	2.91	7.26	21.44	10.88	21	+	-	-	+	+	-	tou
chr3L	4553349	4553849	501	*	5.21	4.75	5.56	-0.81	0.115	0.32	1	2	32.06	28.68	20.17	27.29	68.2	46	+	-	-	-	+	+	CG11357
chr2R	22684317	22684817	501	*	3.14	2.18	3.7	-1.52	0.115	0.32	1	1	11.15	1.66	0.81	13.65	14.45	11	+	-	-	-	+	-
chr3R	15420423	15420923	501	*	3.66	2.73	4.22	-1.49	0.115	0.321	1	2	14.63	0.42	4.84	8.77	15.1	32	+	-	-	+	+	-	FBgn0262367
chr3L	26500423	26500923	501	*	7.1	7.53	6.49	1.04	0.116	0.322	3	3	159.59	82.72	312.19	116.96	34.1	119	+	+	+	+	+	+
chrX	21758819	21759319	501	*	7.59	8.02	6.98	1.04	0.117	0.324	3	3	260.64	120.12	395.27	146.2	51.47	181	+	+	+	+	+	+	FBgn0267704
chr3R	13715081	13715581	501	*	3.51	2.76	4	-1.24	0.118	0.326	0	2	2.79	5.4	12.1	10.72	25.17	12	-	-	-	+	+	-	FBgn0054044
chr3R	9880009	9880509	501	*	4.92	4.49	5.25	-0.76	0.119	0.329	0	2	18.12	19.54	29.85	33.14	39.94	41	-	-	-	+	+	-	FBgn0266389
chrX_DS485281v1_random	83	583	501	*	2.74	3.4	1.47	1.93	0.119	0.329	2	1	18.82	11.22	1.61	0.97	6.33	1	+	+	-	-	+	-
chrX	12936397	12936897	501	*	3.51	4.04	2.69	1.35	0.119	0.329	2	2	11.85	8.31	29.04	4.87	1.46	13	+	-	+	-	+	+	fne
chr2R	2086886	2087386	501	*	5.13	5.51	4.6	0.91	0.12	0.33	2	0	48.09	22.45	66.15	30.22	9.74	33	+	-	+	-	-	-	CG17684
chr2R	4700368	4700868	501	*	4.64	5.05	4.07	0.98	0.123	0.336	3	1	27.18	15.79	56.47	21.44	5.85	23	+	+	+	+	-	-	Nipped-B
chr2R	23077625	23078125	501	*	4.02	4.48	3.34	1.14	0.123	0.336	1	1	32.06	18.7	16.13	7.8	16.56	6	+	-	-	-	+	-	Fib
chrUn_CP007080v1	63137	63637	501	*	4.24	4.71	3.55	1.16	0.123	0.336	3	3	24.39	7.9	45.98	6.82	5.2	23	+	+	+	+	+	+
chr3L	18743530	18744030	501	*	2.53	1.37	3.17	-1.8	0.123	0.336	1	1	0.7	6.23	0.81	2.92	15.1	9	+	-	-	-	+	-	CG6885
chr3L	17563207	17563707	501	*	6.72	7.14	6.11	1.04	0.124	0.336	2	3	150.53	52.79	221.03	100.39	21.6	85	+	-	+	+	+	+	Eip74EF
chrX	109495	109995	501	*	3.8	4.24	3.14	1.1	0.124	0.336	2	0	17.42	11.22	28.23	7.8	4.71	14	+	-	+	-	-	-
chrX	16455881	16456381	501	*	2.49	3.06	1.53	1.53	0.125	0.338	1	3	8.36	3.74	12.91	4.87	1.79	2	+	-	-	+	+	+	para
chr3R	6737309	6737809	501	*	6.34	6.76	5.74	1.02	0.125	0.338	2	3	94.08	44.89	186.34	56.53	17.05	87	+	-	+	+	+	+	pb
chr2L	19575757	19576257	501	*	4.08	3.37	4.55	-1.18	0.125	0.34	1	1	1.39	7.9	21.78	17.54	27.93	25	-	-	+	-	+	-	spi
chr2R	21056946	21057446	501	*	4.61	4.1	4.99	-0.88	0.126	0.34	0	2	16.03	16.21	19.36	11.7	47.41	36	-	-	-	+	+	-	shg
chr3L	3475253	3475753	501	*	4.26	4.7	3.63	1.07	0.126	0.34	3	3	27.88	9.56	40.33	18.52	4.55	14	+	+	+	+	+	+	CG42324
chr2L	516357	516857	501	*	3.09	2.11	3.67	-1.55	0.126	0.34	1	2	2.09	0.42	10.49	14.62	6.5	17	+	-	-	+	+	-	ush
chr2L	849865	850365	501	*	4.91	4.47	5.25	-0.77	0.126	0.34	0	2	20.91	19.12	26.62	49.71	29.07	35	-	-	-	+	+	-	drongo
chr3R	6175477	6175977	501	*	7.42	7.83	6.85	0.98	0.127	0.341	3	3	215.34	120.12	345.26	136.46	47.41	162	+	+	+	+	+	+
chr2L	18895285	18895785	501	*	4.49	3.94	4.89	-0.94	0.127	0.341	1	2	5.58	22.86	17.75	21.44	33.29	34	-	+	-	+	+	-	FBgn0265950
chr2R	23214171	23214671	501	*	3.58	4.08	2.81	1.26	0.129	0.344	2	0	15.33	5.4	29.85	5.85	3.25	12	+	-	+	-	-	-	LS2
chr3R	18109382	18109882	501	*	8.14	8.56	7.54	1.02	0.129	0.344	3	3	352.63	179.98	599.37	245.62	79.89	231	+	+	+	+	+	+	sr
chrX	17723902	17724402	501	*	3.11	3.65	2.26	1.39	0.129	0.344	2	3	10.45	4.57	22.59	8.77	2.6	3	+	-	+	+	+	+	CG42684
chrX	10214081	10214581	501	*	4.57	5	3.96	1.04	0.129	0.344	2	2	31.36	12.05	52.43	17.54	4.22	25	+	-	+	+	-	+	ATPsyndelta
chr3R	26613845	26614345	501	*	5.03	5.44	4.47	0.97	0.129	0.344	1	1	49.48	14.55	66.15	37.04	8.28	21	+	-	-	+	-	-
chr2L	21028980	21029480	501	*	3.69	4.16	2.98	1.18	0.129	0.344	2	0	9.76	13.3	30.65	12.67	6.98	4	+	-	+	-	-	-	CG42238
chrX	5282726	5283226	501	*	4.53	4.93	3.95	0.98	0.131	0.347	3	1	32.06	12.89	46.79	14.62	5.85	26	+	+	+	-	-	+
chr3L	10941875	10942375	501	*	2.34	2.96	1.22	1.73	0.132	0.348	3	3	6.27	3.33	13.71	5.85	0.16	1	+	+	+	+	+	+
chrX	6492364	6492864	501	*	7.43	7.86	6.82	1.05	0.132	0.348	3	3	206.98	99.76	391.24	162.77	36.05	139	+	+	+	+	+	+	CG42340
chrX	20036908	20037408	501	*	3.23	3.78	2.32	1.46	0.132	0.348	2	1	10.45	2.49	28.23	2.92	3.09	9	+	-	+	-	-	+	Dop2R
chrX	16574679	16575179	501	*	5.39	5.78	4.84	0.93	0.133	0.35	3	3	34.84	28.26	101.64	33.14	11.04	42	+	+	+	+	+	+	CanA-14F
chr3R	2156671	2157171	501	*	5.48	4.94	5.87	-0.93	0.133	0.35	0	2	27.18	9.98	54.85	45.81	38.48	91	-	-	-	-	+	+	FBgn0058182
chr2R	14429263	14429763	501	*	5.34	4.88	5.7	-0.81	0.133	0.35	2	2	15.33	28.68	44.37	72.13	38.32	45	+	+	-	+	+	-	phyl
chr3L	14945944	14946444	501	*	4.21	3.7	4.59	-0.89	0.134	0.351	2	3	10.45	9.14	19.36	20.47	30.85	21	-	+	+	+	+	+	BobA
chrX	7690636	7691136	501	*	2.71	1.8	3.27	-1.47	0.134	0.352	3	3	3.48	2.91	4.03	16.57	4.38	8	+	+	+	+	+	+	CHES-1-like
chr2L	8612001	8612501	501	*	3.28	3.83	2.38	1.44	0.135	0.352	2	2	14.63	2.91	25.01	7.8	5.85	2	+	-	+	-	+	+	Sema1a
chrX	14813158	14813658	501	*	3.28	3.77	2.54	1.22	0.137	0.358	3	2	11.85	12.05	16.94	4.87	1.62	11	+	+	+	+	-	+	rut
chr2L	18151212	18151712	501	*	4.5	3.93	4.92	-0.99	0.137	0.358	0	3	2.79	14.55	28.23	30.22	28.42	32	-	-	-	+	+	+	CG17681
chrX	5516886	5517386	501	*	3.55	2.79	4.05	-1.26	0.138	0.359	3	3	4.88	3.74	12.1	7.8	9.74	32	+	+	+	+	+	+	CG12730
chr3L	5952559	5953059	501	*	2.63	1.54	3.25	-1.7	0.138	0.36	0	2	6.27	1.66	0.81	1.95	5.52	21	-	-	-	-	+	+	CG33993
chr2R	18229629	18230129	501	*	3.17	2.33	3.7	-1.37	0.139	0.361	0	2	4.18	2.08	8.87	19.49	4.55	15	-	-	-	+	-	+	fj
chr2L	17691999	17692499	501	*	3.32	3.82	2.56	1.25	0.139	0.361	3	3	9.76	7.48	25.01	8.77	1.95	7	+	+	+	+	+	+	CadN
chr3R	31627152	31627652	501	*	3.72	4.17	3.05	1.12	0.14	0.361	3	3	16.73	9.14	28.23	8.77	3.09	13	+	+	+	+	+	+	kek6
chr3L	1861273	1861773	501	*	4.2	3.49	4.67	-1.18	0.14	0.362	1	1	13.94	1.25	18.55	30.22	12.02	34	+	-	-	-	+	-	Rap1
chr3L	6979866	6980366	501	*	4.17	3.61	4.58	-0.97	0.141	0.364	1	1	16.73	3.74	16.13	23.39	24.36	24	+	-	-	-	+	-	Galphai
chr2R	20539100	20539600	501	*	4.83	4.44	5.15	-0.71	0.142	0.364	1	1	18.82	19.54	26.62	33.14	37.02	36	-	-	+	-	+	-	CG13427
chr2R	7692831	7693331	501	*	2.83	1.85	3.41	-1.56	0.142	0.364	1	1	5.58	0.42	4.84	12.67	3.25	16	+	-	-	-	-	+	LRR
chr2R	23759245	23759745	501	*	3.01	2.11	3.56	-1.45	0.142	0.364	1	2	4.88	1.66	6.45	17.54	2.92	15	+	-	-	+	-	+	sona
chr3R	29069160	29069660	501	*	3.09	2.19	3.64	-1.45	0.143	0.365	1	1	2.79	0.42	10.49	17.54	8.77	11	+	-	-	-	+	-	CG11873
chr2L	8846804	8847304	501	*	4.23	3.74	4.59	-0.85	0.143	0.365	1	1	13.24	9.14	17.75	22.42	28.9	21	-	-	+	-	+	-
chr3L	19739681	19740181	501	*	3.15	3.68	2.29	1.39	0.143	0.366	2	3	9.76	3.74	25.01	9.75	1.95	3	+	-	+	+	+	+	CG42637
chr2R	23593874	23594374	501	*	6.58	6.98	6.04	0.93	0.144	0.366	3	3	124.05	57.78	196.02	78.95	23.06	96	+	+	+	+	+	+	apt
chr3L	5049973	5050473	501	*	4.59	5	4.02	0.99	0.144	0.366	3	3	21.6	16.63	58.08	22.42	4.22	22	+	+	+	+	+	+	Con
chrX	8476684	8477184	501	*	3.58	4.07	2.86	1.21	0.144	0.366	3	1	10.45	9.14	30.65	7.8	1.95	12	+	+	+	-	-	+	Cp36
chr2R	2663498	2663998	501	*	6.98	7.37	6.43	0.94	0.145	0.367	3	3	135.2	87.29	274.27	127.68	31.83	99	+	+	+	+	+	+
chrX	5124336	5124836	501	*	2.8	3.39	1.77	1.63	0.145	0.368	2	1	12.54	0.42	18.55	2.92	2.27	5	+	-	+	+	-	-	CG15465
chr2R	21546188	21546688	501	*	4.68	4.19	5.05	-0.85	0.146	0.368	1	1	11.85	8.31	34.69	37.04	34.1	28	-	-	+	-	+	-	Egfr
chr3R	9704665	9705165	501	*	3.24	2.47	3.74	-1.28	0.146	0.368	1	1	2.79	2.49	11.29	10.72	9.42	20	+	-	-	-	-	+	Unc-115a
chr3L	8241034	8241534	501	*	3.39	3.88	2.63	1.25	0.146	0.368	2	0	16.73	4.99	22.59	11.7	2.92	4	+	-	+	-	-	-	CG7213
chrX	12676934	12677434	501	*	7.47	7.87	6.91	0.96	0.147	0.369	3	3	226.49	92.69	380.75	154	56.99	150	+	+	+	+	+	+	Tis11
chr3R	8846099	8846599	501	*	4.84	3.63	5.49	-1.86	0.147	0.37	0	2	0.7	3.33	33.07	37.04	50.34	47	-	-	-	+	+	-	pyd
chr2R	6162064	6162564	501	*	4.29	4.7	3.72	0.97	0.148	0.37	2	1	38.33	22.45	16.94	11.7	19.97	8	+	+	-	-	+	-	EcR
chr2L	11966934	11967434	501	*	2.75	3.3	1.84	1.45	0.148	0.37	2	2	16.03	5.4	8.07	3.9	4.87	2	+	-	+	-	+	+	FBgn0263019
chr2R	13691538	13692038	501	*	2.98	1.98	3.57	-1.59	0.149	0.372	3	3	9.76	1.25	0.81	14.62	2.92	18	+	+	+	+	+	+	CG17716
chr2R	21192780	21193280	501	*	4.49	4.01	4.85	-0.84	0.149	0.372	1	1	7.67	22.86	17.75	27.29	30.2	29	-	+	-	-	+	-	tud
chrX	17712931	17713431	501	*	4.22	3.6	4.65	-1.05	0.15	0.373	1	3	11.15	4.16	20.97	18.52	12.83	44	+	-	-	+	+	+	CG42684
chrX	4123108	4123608	501	*	3.42	3.92	2.67	1.25	0.152	0.378	3	3	11.85	11.64	21.78	14.62	1.46	3	+	+	+	+	+	+	tyf
chr2L	1886452	1886952	501	*	4.02	3.38	4.47	-1.09	0.152	0.378	1	1	2.79	6.65	21.78	15.59	18.84	32	-	-	+	-	+	-	Wdr62
chr2L	11899781	11900281	501	*	4.81	5.17	4.32	0.85	0.152	0.378	3	3	32.06	15.79	60.5	25.34	10.72	24	+	+	+	+	+	+	Pde1c
chrX	8518299	8518799	501	*	2.43	1.5	2.99	-1.49	0.152	0.378	0	2	0.7	3.74	4.03	3.9	11.85	8	-	-	-	-	+	+	Nrg
chr3L	24796416	24796916	501	*	4.64	5.02	4.14	0.88	0.153	0.378	3	3	24.39	16.21	56.47	20.47	8.44	24	+	+	+	+	+	+
chr3L	27644219	27644719	501	*	5.95	6.33	5.43	0.9	0.153	0.379	3	3	75.96	29.93	135.52	64.33	18.19	47	+	+	+	+	+	+
chr2R	22507564	22508064	501	*	4.75	4.19	5.15	-0.96	0.154	0.38	1	1	2.79	20.37	31.46	37.04	24.52	45	-	-	+	-	+	-	px
chrX	13815097	13815597	501	*	3.64	4.11	2.93	1.17	0.155	0.381	2	3	16.03	5.82	29.85	5.85	3.09	14	+	-	+	+	+	+	Clic
chrX	20150154	20150654	501	*	3.6	4.12	2.79	1.32	0.155	0.381	1	3	26.48	6.23	19.36	17.54	2.27	1	+	-	-	+	+	+	CG9572
chr3R	17319519	17320019	501	*	6.14	6.51	5.66	0.85	0.157	0.384	3	3	70.39	51.96	150.85	68.23	20.13	63	+	+	+	+	+	+	beat-IIa
chrX	8654469	8654969	501	*	4.68	4.25	5	-0.75	0.157	0.384	0	2	15.33	24.11	17.75	40.94	31.34	24	-	-	-	+	+	-
chrX	3748728	3749228	501	*	3.69	2.83	4.22	-1.39	0.157	0.384	2	3	10.45	0.42	10.49	11.7	5.36	39	+	-	+	+	+	+	Tlk
chrX	15958470	15958970	501	*	3.67	4.12	3.01	1.1	0.157	0.384	2	3	24.39	5.82	21.78	11.7	4.55	8	+	-	+	+	+	+	mmd
chr3L	2808163	2808663	501	*	4.51	4.04	4.87	-0.82	0.159	0.387	1	1	23	7.9	18.55	23.39	24.19	40	-	-	+	-	+	-	Tet
chrX	3979230	3979730	501	*	3.48	3.94	2.8	1.14	0.16	0.388	3	3	10.45	8.31	27.43	11.7	3.25	6	+	+	+	+	+	+
chr2R	16731162	16731662	501	*	4.86	4.41	5.21	-0.8	0.16	0.388	1	2	12.54	12.47	38.72	23.39	45.63	42	-	-	+	+	+	-	Pgant9
chrX	1607732	1608232	501	*	3.54	2.86	4	-1.14	0.161	0.39	1	2	6.27	8.31	7.26	19.49	6.66	22	+	-	-	-	+	+	Mur2B
chrX	9524909	9525409	501	*	3.03	2.12	3.59	-1.47	0.161	0.39	2	3	6.97	0.42	5.65	11.7	3.41	21	+	-	+	+	+	+	CG32700
chr3R	5046692	5047192	501	*	4.74	5.14	4.18	0.95	0.161	0.39	3	3	21.6	17.04	66.95	18.52	5.03	31	+	+	+	+	+	+	FBgn0263626
chr2R	9988800	9989300	501	*	4.62	4.22	4.93	-0.71	0.161	0.39	1	2	17.42	18.29	20.17	30.22	27.44	34	-	+	-	+	+	-	TER94
chrX	12258481	12258981	501	*	2.66	1.78	3.21	-1.42	0.163	0.394	1	1	1.39	1.66	7.26	5.85	5.85	16	+	-	-	-	-	+	Ten-a
chrX	13987464	13987964	501	*	4.88	5.25	4.38	0.87	0.164	0.394	3	3	41.81	17.46	54.85	32.16	6.17	24	+	+	+	+	+	+	FBgn0265866
chrX	6278973	6279473	501	*	3.07	2.18	3.62	-1.44	0.164	0.395	3	3	1.39	2.49	9.68	0.97	16.89	19	+	+	+	+	+	+	CG3566
chrX	6751455	6751955	501	*	2.77	3.32	1.88	1.43	0.164	0.395	3	3	10.45	3.33	16.13	8.77	1.3	1	+	+	+	+	+	+	CG14439
chrX	15158200	15158700	501	*	3.09	3.62	2.23	1.4	0.165	0.395	2	2	4.18	5.4	27.43	2.92	1.14	10	+	-	+	+	-	+	CG9095
chrX	2634321	2634821	501	*	3.18	2.47	3.65	-1.18	0.165	0.395	1	2	5.58	6.23	4.84	6.82	10.88	20	+	-	-	-	+	+	sgg
chr3R	16152573	16153073	501	*	4.35	4.78	3.74	1.05	0.165	0.396	1	1	45.3	9.98	27.43	29.24	3.73	7	+	-	-	+	-	-	Fer2
chr2R	17476095	17476595	501	*	4.9	4.49	5.21	-0.72	0.166	0.397	3	3	17.42	17.87	32.27	44.84	28.25	38	+	+	+	+	+	+	insb
chr3L	17806187	17806687	501	*	7.12	7.5	6.59	0.92	0.166	0.397	3	3	172.13	78.56	293.63	114.04	35.24	139	+	+	+	+	+	+	CG5589
chrX	7310414	7310914	501	*	2.67	1.73	3.24	-1.5	0.168	0.399	3	3	4.18	4.99	0.81	16.57	3.73	8	+	+	+	+	+	+	brk
chrX	9351741	9352241	501	*	3.89	4.31	3.29	1.03	0.168	0.399	2	0	19.51	8.73	31.46	15.59	3.73	10	+	-	+	-	-	-	CG34449
chrX	11686185	11686685	501	*	2.37	1.32	2.98	-1.66	0.168	0.4	2	3	6.27	0.42	0.81	15.59	6.01	2	+	-	+	+	+	+	bif
chrX	2305761	2306261	501	*	3.65	3.03	4.08	-1.05	0.169	0.4	1	1	2.79	10.39	11.29	16.57	16.08	18	-	+	-	-	+	-	Raf
chrX	12727764	12728264	501	*	4.05	3.47	4.47	-1	0.169	0.4	2	2	10.45	5.82	16.94	39.96	16.4	10	+	-	+	+	+	-	FBgn0264678
chr3L	10293532	10294032	501	*	2.36	2.95	1.34	1.61	0.169	0.4	1	3	6.27	0.83	16.13	0.97	1.62	5	+	-	-	+	+	+	FBgn0267665
chrX	13629167	13629667	501	*	9.24	9.65	8.67	0.99	0.169	0.4	3	3	794.45	360.37	1257.62	526.33	146.14	546	+	+	+	+	+	+	NFAT
chr2R	13810858	13811358	501	*	2.55	3.15	1.5	1.65	0.17	0.4	2	0	12.54	0.42	13.71	6.82	0.65	1	+	-	+	-	-	-	stj
chr2R	11191500	11192000	501	*	4.96	4.57	5.27	-0.7	0.17	0.401	1	2	32.06	21.61	17.75	36.06	53.58	26	+	-	-	+	+	-	shn
chr3R	22396990	22397490	501	*	5.37	5.66	5.01	0.65	0.17	0.401	3	2	62.72	44.48	44.37	38.99	21.6	36	+	+	+	-	+	+	CG13857
chr3R	7083359	7083859	501	*	6.67	7.05	6.16	0.89	0.171	0.401	3	3	114.29	56.94	225.87	83.82	25.98	104	+	+	+	+	+	+	alphaTub84B
chr3R	24464641	24465141	501	*	2.97	3.48	2.19	1.29	0.171	0.401	2	0	14.63	8.31	10.49	10.72	0.97	2	+	-	+	-	-	-	FBgn0267209
chr2R	24385670	24386170	501	*	5.85	6.18	5.42	0.76	0.171	0.401	2	3	101.05	46.55	69.37	62.38	18.84	47	+	+	-	+	+	+	mAChR-A
chr2L	3072175	3072675	501	*	4.56	4.97	3.97	1.01	0.173	0.405	2	1	20.21	37.82	36.3	1.95	28.9	16	-	+	+	-	+	-	toc
chrX	13805448	13805948	501	*	2.8	2.05	3.29	-1.24	0.174	0.407	1	2	3.48	1.66	7.26	11.7	8.61	9	+	-	-	-	+	+	inaE
chr3L	15324195	15324695	501	*	5.5	5.86	5	0.86	0.175	0.407	3	3	55.75	22.86	96	33.14	11.04	52	+	+	+	+	+	+
chr3R	16251216	16251716	501	*	4.98	4.58	5.29	-0.7	0.175	0.407	1	2	27.88	15.79	28.23	44.84	51.15	21	-	-	+	+	+	-	tara
chr2L	13215779	13216279	501	*	3.49	2.82	3.94	-1.11	0.175	0.407	3	2	5.58	11.64	4.03	7.8	26.14	12	+	+	+	-	+	+	FBgn0004192
chr3L	18932355	18932855	501	*	3.17	3.66	2.44	1.22	0.176	0.408	2	0	11.15	16.21	10.49	0.97	2.27	13	+	+	-	-	-	-	CG32204
chr2L	1517996	1518496	501	*	4.9	4.52	5.2	-0.68	0.176	0.408	1	1	26.48	19.95	22.59	21.44	48.06	41	+	-	-	-	+	-	halo
chrX	8656935	8657435	501	*	3.01	2.19	3.53	-1.34	0.176	0.408	3	3	2.79	0.42	10.49	13.65	8.12	13	+	+	+	+	+	+
chr3L	12670133	12670633	501	*	3.17	3.64	2.47	1.18	0.177	0.409	2	0	11.15	5.4	20.97	7.8	1.79	7	+	-	+	-	-	-
chr2R	3501274	3501774	501	*	2.28	1.2	2.89	-1.69	0.177	0.409	0	2	0.7	5.4	0.81	1.95	6.33	14	-	-	-	-	+	+
chr2L	21877230	21877730	501	*	4.17	3.61	4.58	-0.97	0.177	0.409	1	1	4.88	22.03	9.68	12.67	35.88	23	-	+	-	-	+	-
chrX	4690745	4691245	501	*	3.83	3.2	4.27	-1.07	0.178	0.409	1	3	15.33	5.82	6.45	31.19	7.63	19	+	-	-	+	+	+	ctp
chr3R	15988296	15988796	501	*	4.39	3.95	4.72	-0.78	0.179	0.411	0	2	9.76	19.54	16.94	19.49	28.74	31	-	-	-	-	+	+	srp
chr3R	8660198	8660698	501	*	3.98	3.39	4.4	-1.01	0.179	0.411	0	2	2.09	12.47	16.94	26.32	18.19	19	-	-	-	+	+	-	bel
chr3R	23057548	23058048	501	*	7.09	7.46	6.6	0.87	0.179	0.412	3	3	189.55	83.96	255.72	134.51	34.91	121	+	+	+	+	+	+	CG17119
chr2R	238547	239047	501	*	6.81	7.16	6.34	0.82	0.182	0.416	3	3	139.38	78.56	211.35	94.54	30.85	117	+	+	+	+	+	+
chr2R	14430883	14431383	501	*	4.88	4.43	5.22	-0.79	0.182	0.416	1	1	6.27	22.03	36.3	38.01	45.79	28	-	-	+	-	+	-	phyl
chr2R	2106840	2107340	501	*	5.41	5.77	4.95	0.82	0.182	0.416	2	3	51.57	27.02	84.7	36.06	9.42	47	+	-	+	+	+	+	CG17684
chr3L	20241012	20241512	501	*	2.78	2.01	3.28	-1.28	0.183	0.416	1	1	5.58	0.83	5.65	8.77	7.47	13	+	-	-	-	-	+	Clc
chrX	13998739	13999239	501	*	7.1	7.48	6.57	0.92	0.183	0.417	3	3	163.07	65.26	308.96	123.78	33.12	128	+	+	+	+	+	+	ben
chrX	20239453	20239953	501	*	3.59	4.02	2.98	1.04	0.184	0.418	2	3	20.21	9.98	18.55	8.77	1.95	13	+	-	+	+	+	+	obst-A
chrX	6928813	6929313	501	*	4.6	4.95	4.13	0.82	0.186	0.423	2	2	42.51	18.7	31.46	29.24	5.36	18	+	-	+	+	-	+	CG14431
chr3L	14972773	14973273	501	*	5.41	5.02	5.71	-0.69	0.187	0.423	2	3	18.82	29.51	49.21	35.09	58.78	63	-	+	+	+	+	+	Brd
chrX	11222106	11222606	501	*	3.96	3.41	4.36	-0.94	0.188	0.425	3	3	6.97	13.72	11.29	18.52	12.02	31	+	+	+	+	+	+	CG44422
chr2L	12678130	12678630	501	*	4.66	3.71	5.23	-1.52	0.188	0.426	0	3	0.7	7.07	31.46	42.89	31.99	38	-	-	-	+	+	+	pdm2
chr2L	17266648	17267148	501	*	3.69	2.92	4.19	-1.28	0.189	0.426	0	2	2.09	0.42	20.17	11.7	17.21	26	-	-	-	-	+	+
chr3L	1282747	1283247	501	*	8.78	9.16	8.27	0.9	0.189	0.427	3	3	974.25	426.46	319.45	467.85	153.77	303	+	+	+	+	+	+	CG32333
chr2R	4601755	4602255	501	*	4.35	4.72	3.86	0.86	0.19	0.427	2	0	31.36	17.87	29.85	27.29	4.22	12	+	-	+	-	-	-	p120ctn
chr3R	22134279	22134779	501	*	4.72	3.86	5.26	-1.4	0.19	0.427	1	2	2.79	4.57	36.3	55.56	29.39	30	-	-	+	+	+	-	SKIP
chr2R	22360593	22361093	501	*	3.05	3.54	2.28	1.26	0.192	0.431	1	1	11.85	3.74	19.36	1.95	1.62	11	+	-	-	-	+	-	Liprin-gamma
chr3R	24726230	24726730	501	*	4.45	4.03	4.77	-0.74	0.192	0.431	1	2	16.73	13.72	18.55	25.34	19.49	37	+	-	-	-	+	+	tok
chr3L	5626714	5627214	501	*	10.13	10.52	9.6	0.93	0.193	0.431	3	3	1339.42	677.93	2401.49	1059.48	317.77	949	+	+	+	+	+	+
chr3R	4757280	4757780	501	*	4.57	4.91	4.12	0.79	0.193	0.432	3	3	33.45	15.38	41.14	21.44	6.66	24	+	+	+	+	+	+	atms
chr2L	20283600	20284100	501	*	7.29	7.65	6.79	0.86	0.195	0.436	2	3	207.67	88.95	306.54	165.7	40.92	126	+	-	+	+	+	+
chrY	2389098	2389598	501	*	4.87	5.21	4.42	0.79	0.196	0.437	3	3	45.3	16.63	49.21	29.24	6.82	28	+	+	+	+	+	+	WDY
chr2L	12805123	12805623	501	*	2.83	3.4	1.88	1.51	0.197	0.44	2	1	2.09	2.08	27.43	8.77	1.3	1	+	-	+	-	-	+
chrUn_CP007094v1	5452	5952	501	*	6.95	7.3	6.5	0.81	0.199	0.441	3	3	165.86	74.4	233.13	120.86	37.02	113	+	+	+	+	+	+
chr3R	24555206	24555706	501	*	2.54	1.6	3.11	-1.51	0.199	0.441	3	3	2.09	5.4	1.61	18.52	6.33	1	+	+	+	+	+	+	FBgn0004188
chr3R	15989206	15989706	501	*	5.55	5.2	5.83	-0.63	0.199	0.441	1	2	24.39	32.42	53.24	56.53	66.57	47	-	-	+	+	+	-	srp
chrX	19456058	19456558	501	*	2.7	1.79	3.25	-1.45	0.199	0.441	2	2	0.7	0.83	8.87	10.72	2.76	15	+	-	+	+	-	+	kek5
chr2L	5044627	5045127	501	*	4.66	5.03	4.15	0.88	0.199	0.441	2	0	39.03	8.31	50.82	21.44	5.85	26	+	-	+	-	-	-	CG31650
chrX	2667451	2667951	501	*	9.64	10.03	9.1	0.93	0.2	0.441	3	3	939.41	470.11	1726.3	721.26	192.09	730	+	+	+	+	+	+	sgg
chr2R	12782802	12783302	501	*	2.86	3.39	2.02	1.36	0.2	0.441	1	1	6.27	3.33	21.78	4.87	0.32	7	+	-	-	+	-	-	sca
chr2R	10496031	10496531	501	*	6.44	6.8	5.98	0.82	0.201	0.441	3	3	125.44	41.57	166.18	92.59	24.52	72	+	+	+	+	+	+	lola
chrX	16123942	16124442	501	*	2.74	3.29	1.83	1.46	0.201	0.441	3	3	11.15	1.25	16.94	0.97	4.71	5	+	+	+	+	+	+	disco-r
chr2L	19167043	19167543	501	*	2.69	3.21	1.86	1.35	0.201	0.441	2	0	3.48	4.99	19.36	7.8	2.11	1	+	-	+	-	-	-	brat
chr2R	17458400	17458900	501	*	3.7	3.1	4.12	-1.03	0.201	0.442	1	2	2.09	5.82	17.75	13.65	27.6	11	+	-	-	-	+	+	CG14478
chrX	3414638	3415138	501	*	6.73	7.09	6.27	0.82	0.202	0.444	2	2	159.59	66.5	181.5	115.99	24.19	91	+	-	+	+	-	+	CG12535
chr3L	8670111	8670611	501	*	5.64	5.29	5.91	-0.62	0.203	0.444	1	3	27.18	48.63	41.95	62.38	54.07	64	-	+	-	+	+	+
chr3L	27422878	27423378	501	*	4.86	5.22	4.39	0.82	0.204	0.447	3	3	36.24	20.37	54.85	38.99	5.03	19	+	+	+	+	+	+
chr2L	14443788	14444288	501	*	4.48	3.5	5.06	-1.56	0.205	0.447	1	1	0.7	4.16	29.04	19.49	39.78	41	-	-	+	-	+	-
chr3R	17893558	17894058	501	*	3.49	3.95	2.81	1.13	0.207	0.45	1	2	22.3	4.57	19.36	14.62	1.46	5	+	-	-	+	-	+	Rim
chrX	14629803	14630303	501	*	4.14	3.66	4.5	-0.84	0.207	0.45	0	2	11.15	8.31	18.55	14.62	17.21	36	-	-	-	-	+	+	NetA
chr2R	19669430	19669930	501	*	3.19	2.46	3.67	-1.2	0.207	0.45	1	3	3.48	5.82	7.26	0.97	18.19	19	-	-	+	+	+	+	hrg
chrUn_CP007081v1	71648	72148	501	*	4.83	5.2	4.33	0.88	0.207	0.45	2	1	34.84	9.56	66.15	32.16	6.01	22	+	-	+	+	-	-	klhl10
chr2L	20259148	20259648	501	*	2.76	1.72	3.35	-1.63	0.208	0.451	1	3	6.27	0.42	3.23	18.52	0.16	12	+	-	-	+	+	+	CG17571
chrX	14043477	14043977	501	*	6.01	6.35	5.57	0.78	0.208	0.451	2	3	78.05	36.58	129.88	65.3	17.37	60	+	-	+	+	+	+
chr2L	18629076	18629576	501	*	3.85	3.29	4.25	-0.96	0.209	0.451	3	3	11.85	7.07	10.49	28.27	6.98	22	+	+	+	+	+	+	MESR3
chr3L	11925342	11925842	501	*	4.46	4.07	4.77	-0.7	0.209	0.452	0	2	11.15	14.96	24.2	33.14	28.58	20	-	-	-	+	+	-	byn
chr3L	8454833	8455333	501	*	3.28	2.69	3.71	-1.02	0.209	0.452	2	3	6.27	4.16	8.87	18.52	8.61	12	+	+	-	+	+	+	Gug
chr2R	10660460	10660960	501	*	2.3	2.81	1.47	1.34	0.21	0.452	3	2	4.88	3.33	12.91	5.85	0.49	2	+	+	+	-	+	+	FBgn0265645
chr3R	8642362	8642862	501	*	3.82	4.23	3.24	1	0.21	0.452	2	2	30.66	21.61	4.03	12.67	9.58	6	+	+	-	+	+	-	FBgn0012027
chrY	1427578	1428078	501	*	7.69	8.06	7.19	0.87	0.21	0.452	3	3	273.88	112.23	413.83	179.34	47.9	210	+	+	+	+	+	+
chrX	18369311	18369811	501	*	3.12	3.54	2.52	1.02	0.21	0.452	1	2	18.12	9.56	7.26	7.8	3.41	6	+	-	-	+	-	+	FBgn0263769
chrX	13916578	13917078	501	*	2.78	1.87	3.33	-1.46	0.211	0.452	3	3	9.76	0.42	0.81	11.7	3.41	15	+	+	+	+	+	+	mamo
chr3R	3103637	3104137	501	*	3.67	3.03	4.12	-1.09	0.211	0.452	0	2	13.24	10.39	0.81	11.7	31.5	9	-	-	-	-	+	+	FBgn0267430
chr2R	15439217	15439717	501	*	7.8	8.15	7.32	0.83	0.214	0.458	3	3	252.27	145.89	456.58	198.84	63	219	+	+	+	+	+	+	Stacl
chrX	16476482	16476982	501	*	4.44	3.91	4.83	-0.92	0.217	0.462	3	3	14.63	5.4	25.01	50.68	7.63	27	+	+	+	+	+	+	para
chrX	23314901	23315401	501	*	7.19	7.55	6.71	0.84	0.218	0.464	1	3	190.25	74.4	299.28	139.38	34.75	141	+	-	-	+	+	+
chrX	5142223	5142723	501	*	3.15	3.59	2.51	1.08	0.218	0.464	2	3	9.76	4.57	21.78	5.85	3.25	8	+	+	-	+	+	+	CG15465
chrX	20679960	20680460	501	*	3.97	3.49	4.32	-0.83	0.218	0.464	0	2	12.54	8.31	12.91	15.59	14.45	30	-	-	-	-	+	+	hydra
chr2R	4859995	4860495	501	*	6.52	6.87	6.05	0.82	0.219	0.464	3	3	103.14	46.14	201.67	83.82	20.46	94	+	+	+	+	+	+
chr2R	20327912	20328412	501	*	4.98	4.63	5.26	-0.64	0.219	0.464	0	2	22.3	21.2	30.65	56.53	31.66	27	-	-	-	+	+	-	MED8
chr3R	220262	220762	501	*	3.94	4.29	3.49	0.8	0.221	0.468	2	2	16.73	13.72	28.23	12.67	6.98	14	+	-	+	+	+	-
chrY_DS485975v1_random	364	864	501	*	5.35	5.64	4.98	0.66	0.221	0.468	3	2	42.51	72.32	34.69	20.47	43.35	31	+	+	+	-	+	+
chr2R	21707610	21708110	501	*	3.69	3.2	4.06	-0.86	0.222	0.469	1	3	5.58	6.65	15.33	16.57	19.49	14	+	-	-	+	+	+	HmgD
chr2L	22329417	22329917	501	*	3.96	4.37	3.39	0.98	0.222	0.469	2	0	15.33	11.22	35.49	9.75	1.79	20	+	-	+	-	-	-	Marf1
chrUn_DS484267v1	1916	2416	501	*	6.68	7.03	6.22	0.82	0.223	0.469	2	2	101.05	60.69	231.52	110.14	23.22	90	+	-	+	+	-	+
chr3R	2623729	2624229	501	*	5.74	6.08	5.29	0.79	0.224	0.471	3	3	47.39	27.43	128.26	50.68	13.64	53	+	+	+	+	+	+	FBgn0267430
chr3R	28586166	28586666	501	*	4.71	4.31	5.03	-0.72	0.225	0.472	1	3	7.67	17.04	34.69	38.01	25.82	34	-	-	+	+	+	+	fkh
chr2R	5379403	5379903	501	*	6.08	6.42	5.65	0.77	0.225	0.472	2	3	110.81	35.33	110.52	81.87	16.4	52	+	-	+	+	+	+
chr3R	26642856	26643356	501	*	3.84	4.23	3.31	0.92	0.226	0.475	3	3	20.91	7.9	27.43	18.52	4.22	7	+	+	+	+	+	+
chr3L	24819284	24819784	501	*	4.85	5.17	4.45	0.72	0.227	0.475	2	0	36.24	17.46	54.05	29.24	8.12	28	+	-	+	-	-	-
chr2L	19602502	19603002	501	*	2.51	1.68	3.03	-1.34	0.227	0.475	1	1	3.48	3.74	2.42	12.67	1.79	10	+	-	-	+	-	-	Lar
chr2R	3612694	3613194	501	*	7.42	7.76	6.96	0.8	0.228	0.476	3	3	181.19	106.82	363.81	171.54	47.41	155	+	+	+	+	+	+
chr3R	24875924	24876424	501	*	3.46	2.69	3.96	-1.27	0.23	0.479	2	2	2.79	0.42	16.13	23.39	3.25	20	+	-	+	+	-	+	CG3744
chr3L	24602133	24602633	501	*	5.11	5.43	4.71	0.72	0.23	0.48	3	3	31.36	23.69	74.21	40.94	10.55	27	+	+	+	+	+	+
chr3L	7344356	7344856	501	*	6.02	6.35	5.6	0.75	0.232	0.482	3	3	68.3	39.07	137.14	55.56	16.89	73	+	+	+	+	+	+	Cln7
chr3L	13236811	13237311	501	*	3.83	3.27	4.23	-0.96	0.232	0.482	2	3	9.06	4.57	15.33	18.52	6.66	31	+	-	+	+	+	+	caps
chr2R	23456207	23456707	501	*	10.5	10.87	10.01	0.86	0.233	0.484	3	3	2009.83	852.92	2754.02	1504.91	358.36	1232	+	+	+	+	+	+	CG43795
chr2L	13225288	13225788	501	*	6.07	5.72	6.35	-0.63	0.234	0.485	2	2	27.88	55.7	74.21	89.67	102.3	53	-	+	+	+	+	-	Ski6
chr3L	12016366	12016866	501	*	3.99	4.39	3.42	0.97	0.234	0.485	2	0	19.51	8.73	34.69	12.67	1.46	18	+	-	+	-	-	-	rols
chrX	10335905	10336405	501	*	2.94	3.38	2.31	1.07	0.235	0.485	2	0	12.54	4.16	14.52	5.85	4.06	5	+	-	+	-	-	-	CG43740
chr2R	19011886	19012386	501	*	5.37	5.7	4.96	0.74	0.236	0.487	2	2	54.36	28.68	72.6	49.71	7.47	36	+	-	+	+	-	+
chr2R	21497125	21497625	501	*	5.4	5.7	5.03	0.67	0.236	0.487	1	1	82.93	26.19	46.79	51.66	20.3	26	+	-	-	-	+	-	Fkbp14
chr3R	29470754	29471254	501	*	2.63	3.1	1.93	1.17	0.237	0.487	1	1	9.06	4.57	12.1	0.97	2.44	8	+	-	-	-	-	+	Ptp99A
chrX	19146527	19147027	501	*	3.15	2.46	3.61	-1.15	0.237	0.487	1	1	1.39	6.23	8.87	14.62	4.06	18	-	+	-	+	-	-	RhoGAP18B
chr3R	22789109	22789609	501	*	5.43	5.07	5.72	-0.64	0.239	0.49	2	2	21.6	25.35	54.05	40.94	38.97	78	-	+	+	-	+	+	CG7029
chr2L	8279311	8279811	501	*	2.57	3.1	1.73	1.37	0.239	0.49	3	2	6.27	3.33	16.13	8.77	0.16	1	+	+	+	+	-	+	Btk29A
chrX	21489727	21490227	501	*	3.59	4	3.01	0.98	0.239	0.49	2	2	11.85	4.57	31.46	10.72	5.52	8	+	-	+	+	+	-
chr3R	16273010	16273510	501	*	3.7	3.13	4.11	-0.98	0.24	0.491	1	1	18.12	2.49	5.65	20.47	10.23	21	+	-	-	+	-	-	gish
chrX	4396083	4396583	501	*	4.81	5.14	4.38	0.75	0.24	0.491	3	3	34.15	14.13	57.27	28.27	6.33	28	+	+	+	+	+	+	FBgn0052773
chrX	20575389	20575889	501	*	7.61	7.96	7.15	0.81	0.241	0.491	3	3	235.55	108.07	404.95	181.29	46.28	198	+	+	+	+	+	+
chrX	8857481	8857981	501	*	2.66	3.11	1.99	1.13	0.241	0.492	2	1	10.45	6.65	8.87	0.97	2.92	8	+	-	+	-	-	+	CG12075
chrX	14199761	14200261	501	*	4.91	5.2	4.55	0.65	0.243	0.494	2	1	31.36	24.11	54.85	31.19	10.07	29	+	-	+	+	-	-	yl
chrX	9484315	9484815	501	*	4.75	5.05	4.36	0.69	0.243	0.494	3	3	27.88	19.12	52.43	16.57	10.07	35	+	+	+	+	+	+	mgl
chr3L	9155167	9155667	501	*	2.61	1.76	3.14	-1.38	0.244	0.496	2	3	2.79	4.99	2.42	12.67	0.81	13	+	-	+	+	+	+	Rdl
chr2R	9986112	9986612	501	*	5.27	5.53	4.95	0.57	0.245	0.496	1	1	29.97	55.28	53.24	28.27	34.75	30	-	+	-	-	+	-	TER94
chrX	5461820	5462320	501	*	7.48	7.83	7.01	0.81	0.245	0.496	3	3	212.55	103.91	363.81	152.05	37.83	198	+	+	+	+	+	+	SPR
chr2L	20768471	20768971	501	*	5.47	5.17	5.72	-0.55	0.246	0.497	2	2	34.15	24.52	49.21	57.51	52.77	48	+	-	+	+	+	-	cad
chrX	3210786	3211286	501	*	6.53	6.86	6.1	0.76	0.246	0.498	3	3	151.22	52.37	146.01	126.71	22.57	57	+	+	+	+	+	+	dnc
chr3R	17624486	17624986	501	*	4.28	4.62	3.83	0.79	0.247	0.498	2	1	45.99	19.54	8.07	12.67	12.99	17	+	+	-	-	+	-	FBgn0011993
chrX	5350114	5350614	501	*	3.87	4.21	3.4	0.81	0.247	0.498	3	3	27.18	9.98	18.55	10.72	5.03	16	+	+	+	+	+	+	SK
chrX	21012536	21013036	501	*	2.71	3.15	2.07	1.08	0.247	0.498	3	3	6.27	5.82	14.52	7.8	1.79	3	+	+	+	+	+	+
chrX	18934860	18935360	501	*	2.29	2.83	1.44	1.39	0.249	0.5	1	2	11.15	1.25	8.87	0.97	0.16	7	+	-	-	-	+	+	CG43759
chrX	4699323	4699823	501	*	3.27	2.69	3.68	-0.99	0.249	0.5	3	3	9.06	6.23	4.03	17.54	6.82	14	+	+	+	+	+	+	ctp
chrX	19297769	19298269	501	*	3.27	2.66	3.7	-1.04	0.25	0.502	1	2	7.67	0.83	10.49	19.49	11.53	8	+	-	-	+	+	-	CG8034
chrX	6165730	6166230	501	*	3.55	3.95	2.98	0.97	0.25	0.502	3	3	18.82	4.16	23.39	4.87	4.87	14	+	+	+	+	+	+	Ca-alpha1T
chrX	18762845	18763345	501	*	4.19	4.52	3.75	0.77	0.252	0.504	1	1	22.3	9.56	37.11	18.52	6.82	15	+	-	-	+	-	-
chr2L	2456431	2456931	501	*	4.8	4.41	5.11	-0.7	0.253	0.507	1	1	10.45	34.91	18.55	15.59	44.98	43	-	+	-	-	+	-	dpp
chr2R	518074	518574	501	*	5.96	6.27	5.58	0.69	0.255	0.508	3	3	60.63	40.32	129.88	64.33	19	60	+	+	+	+	+	+	DIP-lambda
chr2L	4235935	4236435	501	*	3.99	4.35	3.51	0.83	0.255	0.508	2	1	17.42	13.72	29.85	12.67	2.6	19	+	-	+	-	-	+
chrX	1779530	1780030	501	*	3.78	4.18	3.23	0.95	0.256	0.51	3	2	9.76	4.99	39.53	11.7	4.38	12	+	+	+	-	+	+	Adar
chrX	3468145	3468645	501	*	3.78	4.18	3.23	0.95	0.256	0.51	3	2	14.63	4.16	35.49	10.72	3.41	14	+	+	+	-	+	+	CG12206
chr3L	732381	732881	501	*	3.54	2.93	3.96	-1.03	0.257	0.511	2	2	8.36	0.83	13.71	27.29	10.39	9	+	-	+	+	+	-
chr3R	19803650	19804150	501	*	3.05	3.46	2.49	0.97	0.258	0.511	3	1	9.76	6.23	16.94	3.9	3.9	9	+	+	+	-	-	+	bnl
chr2R	15129458	15129958	501	*	5.48	5.11	5.78	-0.66	0.26	0.515	2	2	13.94	28.68	61.31	75.05	36.53	53	-	+	+	+	+	-	chn
chrX	19220380	19220880	501	*	4.24	3.88	4.54	-0.66	0.26	0.515	1	1	14.63	11.64	17.75	28.27	19.32	22	+	-	-	-	+	-	CG7884
chr3R	31554730	31555230	501	*	3.54	3.98	2.9	1.08	0.261	0.515	1	1	6.97	6.65	33.88	7.8	0.65	14	-	-	+	-	-	+	nyo
chrX	12836702	12837202	501	*	2.57	1.74	3.09	-1.35	0.261	0.515	2	2	5.58	0.42	4.03	3.9	1.62	20	+	+	-	+	-	+	Pde9
chr3R	28547095	28547595	501	*	3.64	3.06	4.04	-0.98	0.261	0.515	1	3	0.7	6.65	17.75	20.47	19	10	+	-	-	+	+	+	mIF2
chr3R	2689625	2690125	501	*	2.33	2.82	1.59	1.22	0.261	0.515	1	2	14.63	1.66	4.84	1.95	2.11	5	+	-	-	-	+	+	FBgn0267430
chr3R	30040943	30041443	501	*	4.46	4.1	4.74	-0.64	0.263	0.516	1	1	14.63	19.95	16.94	31.19	35.88	13	-	+	-	-	+	-	janA
chr2R	953895	954395	501	*	3.9	3.48	4.23	-0.75	0.263	0.516	1	1	9.76	12.47	11.29	25.34	19.97	11	-	+	-	-	+	-	CG40498
chr2R	14715697	14716197	501	*	2.56	1.75	3.08	-1.33	0.263	0.516	2	3	3.48	4.16	2.42	17.54	0.81	7	+	-	+	+	+	+	mspo
chr2L	16962629	16963129	501	*	7.87	8.2	7.44	0.76	0.264	0.517	3	3	296.18	145.89	440.45	221.25	62.35	239	+	+	+	+	+	+	FBgn0266823
chr2L	19356960	19357460	501	*	8.31	8.65	7.86	0.79	0.265	0.518	3	3	377.02	184.97	646.15	307.02	80.05	312	+	+	+	+	+	+	dnt
chr3R	26496122	26496622	501	*	4.1	4.46	3.61	0.85	0.265	0.518	2	0	34.84	5.4	25.81	15.59	4.06	17	+	-	+	-	-	-	plum
chrX	17485661	17486161	501	*	2.67	1.9	3.17	-1.27	0.265	0.518	1	1	1.39	4.16	5.65	0.97	5.03	21	+	-	-	-	-	+	CG43658
chr2R	9917162	9917662	501	*	2.76	1.94	3.28	-1.34	0.267	0.521	1	1	6.97	3.74	0.81	16.57	0.65	12	+	-	-	+	-	-	Mef2
chr3L	24421392	24421892	501	*	7.09	7.41	6.68	0.73	0.268	0.523	3	3	194.43	69.83	245.23	136.46	37.67	134	+	+	+	+	+	+
chr3R	1096657	1097157	501	*	4.38	4.7	3.98	0.72	0.269	0.523	2	1	32.75	11.22	33.88	25.34	5.85	16	+	-	+	+	-	-	Myo81F
chr2L	2172403	2172903	501	*	4.7	4.34	4.99	-0.65	0.27	0.525	2	1	6.97	24.11	29.85	25.34	32.15	38	-	+	+	-	+	-	aop
chr3L	5835307	5835807	501	*	2.73	3.19	2.04	1.14	0.27	0.525	2	0	6.97	5.82	14.52	5.85	5.52	1	+	+	-	-	-	-	vn
chr2L	17556280	17556780	501	*	4.14	4.47	3.71	0.75	0.271	0.525	2	3	25.78	9.98	30.65	18.52	4.87	16	+	-	+	+	+	+	CG7094
chr2L	5209184	5209684	501	*	4.05	3.57	4.42	-0.85	0.271	0.525	1	1	11.15	21.2	3.23	9.75	35.4	19	-	+	-	-	+	-	Cyp28d2
chr2R	20646078	20646578	501	*	4.41	3.97	4.75	-0.78	0.275	0.531	0	3	2.09	14.13	30.65	25.34	24.19	31	-	-	-	+	+	+	Lrt
chr3R	9839580	9840080	501	*	4.44	4.79	3.98	0.81	0.275	0.532	2	1	17.42	9.14	56.47	23.39	4.06	20	+	-	+	-	-	+	Teh1
chr3L	2482926	2483426	501	*	4.42	4.09	4.68	-0.59	0.277	0.535	0	2	16.03	14.13	20.97	31.19	23.87	22	-	-	-	+	+	-	Svil
chr3L	24911424	24911924	501	*	2.6	2.01	3.01	-1	0.277	0.535	0	2	5.58	2.49	4.03	9.75	8.44	6	-	-	-	+	+	-
chr2R	25010596	25011096	501	*	4.27	3.46	4.78	-1.32	0.28	0.538	1	2	0.7	4.99	27.43	41.91	26.79	14	-	-	+	+	+	-	uzip
chrX	17027458	17027958	501	*	2.87	3.28	2.28	1	0.281	0.54	2	0	12.54	5.4	11.29	8.77	0.81	5	+	-	+	-	-	-	CG45002
chr2L	9974579	9975079	501	*	2.65	3.09	2.01	1.08	0.282	0.541	2	2	9.76	2.08	13.71	6.82	2.27	3	+	-	+	-	+	+
chr3R	6429612	6430112	501	*	2.28	2.72	1.65	1.07	0.282	0.541	1	1	6.27	6.23	7.26	0.97	1.46	7	+	-	-	-	+	-	gpp
chrX	6924759	6925259	501	*	3.91	4.29	3.39	0.9	0.283	0.541	1	1	20.91	11.22	26.62	12.67	0.81	18	+	-	-	+	-	-	CG14431
chr2L	13932043	13932543	501	*	2.55	1.68	3.09	-1.42	0.283	0.541	1	1	8.36	0.42	0.81	0.97	2.6	22	+	-	-	-	+	-	Ance-3
chr3L	26139269	26139769	501	*	4.07	4.43	3.58	0.85	0.283	0.541	2	1	13.24	7.9	43.56	6.82	5.03	24	+	-	+	+	-	-
chr3L	6683358	6683858	501	*	3.61	4.02	3.04	0.99	0.283	0.541	2	1	22.3	7.07	19.36	20.47	1.14	3	+	-	+	+	-	-
chr3L	11339440	11339940	501	*	2.3	2.74	1.66	1.08	0.286	0.545	3	3	6.27	3.33	10.49	3.9	2.6	3	+	+	+	+	+	+	FBgn0266785
chrX	9734881	9735381	501	*	2.62	1.81	3.13	-1.33	0.287	0.546	2	3	7.67	0.42	2.42	12.67	0.65	13	+	-	+	+	+	+	Sp1
chr3L	7560450	7560950	501	*	2.5	2.97	1.81	1.15	0.287	0.546	3	3	2.79	2.91	17.75	3.9	0.65	6	+	+	+	+	+	+	CG14837
chrX	122549	123049	501	*	5.93	6.23	5.55	0.68	0.287	0.546	3	3	73.17	41.15	110.52	69.2	11.53	60	+	+	+	+	+	+	FBgn0058469
chr3L	27701114	27701614	501	*	4.45	4.73	4.09	0.64	0.289	0.549	3	3	27.18	15.38	37.11	22.42	6.66	22	+	+	+	+	+	+
chrX	10134389	10134889	501	*	5.17	5.46	4.81	0.65	0.29	0.55	2	3	35.54	17.04	79.05	37.04	12.99	34	+	-	+	+	+	+	RhoU
chrX	1986025	1986525	501	*	5.43	5.72	5.07	0.65	0.291	0.552	1	1	55.75	26.6	75.83	48.73	8.93	43	+	-	-	+	-	-	Hr4
chrX	14152575	14153075	501	*	11.46	11.79	11.04	0.75	0.292	0.552	3	3	3345.07	1719.15	5532.23	2747.63	766.57	2807	+	+	+	+	+	+	CG12479
chr2L	11317408	11317908	501	*	6.92	7.22	6.55	0.66	0.293	0.554	3	3	142.86	83.96	219.42	124.76	32.31	125	+	+	+	+	+	+	FBgn0265794
chr2L	22515442	22515942	501	*	5.94	6.23	5.57	0.66	0.295	0.556	2	2	96.17	30.34	99.22	75.05	15.91	52	+	-	+	+	+	-
chr2L	16613081	16613581	501	*	5.11	5.42	4.72	0.7	0.295	0.556	2	3	43.21	12.47	72.6	32.16	7.96	39	+	-	+	+	+	+	mtgo
chr2R	7196379	7196879	501	*	6.28	6.59	5.89	0.7	0.298	0.561	3	3	76.66	36.16	176.66	80.9	17.86	79	+	+	+	+	+	+	pk
chr3R	12005341	12005841	501	*	3.23	2.66	3.64	-0.98	0.299	0.562	2	3	7.67	0.83	10.49	14.62	5.85	17	+	-	+	+	+	+	Tk
chr2L	16512809	16513309	501	*	2.75	3.16	2.19	0.97	0.3	0.563	1	1	7.67	6.23	12.91	9.75	1.95	2	+	-	-	-	-	+	CG5953
chr3R	5546561	5547061	501	*	3.24	3.64	2.69	0.96	0.3	0.563	1	1	11.15	3.74	22.59	12.67	1.62	5	+	-	-	+	-	-	CG2519
chrX	6668931	6669431	501	*	3.18	2.65	3.57	-0.92	0.304	0.57	2	3	4.18	4.99	9.68	17.54	5.03	13	+	-	+	+	+	+	CG3198
chrX	8343486	8343986	501	*	2.59	1.76	3.12	-1.36	0.304	0.57	1	3	4.88	0.42	4.84	5.85	0.16	20	+	-	-	+	+	+	nAChRalpha3
chr3R	16629283	16629783	501	*	4.7	4.95	4.39	0.56	0.305	0.57	1	3	36.94	18.7	37.11	25.34	10.72	27	+	-	-	+	+	+	Fas1
chrX	3153956	3154456	501	*	2.35	1.61	2.83	-1.22	0.305	0.57	1	3	0.7	0.42	8.07	10.72	2.6	8	+	-	-	+	+	+	N
chr2L	12081019	12081519	501	*	5.02	4.75	5.25	-0.49	0.306	0.571	1	1	23	32.01	25.81	27.29	47.58	39	-	+	-	-	+	-	FBgn0265801
chr2L	8083505	8084005	501	*	3.86	3.38	4.22	-0.84	0.306	0.571	1	2	11.85	1.66	17.75	23.39	9.58	23	+	-	-	+	+	-	Bsg
chrX	1427920	1428420	501	*	2.66	3.12	1.99	1.13	0.307	0.571	1	1	11.85	3.74	10.49	9.75	0.16	2	+	-	-	-	-	+	futsch
chr3L	4252051	4252551	501	*	5.37	4.98	5.68	-0.7	0.307	0.572	2	3	25.78	4.99	63.73	58.48	32.15	63	+	-	+	+	+	+	CG1265
chrX	4061191	4061691	501	*	2.58	3	1.98	1.01	0.311	0.577	2	0	4.88	2.91	16.13	3.9	1.95	6	+	-	+	-	-	-
chrX	8309961	8310461	501	*	2.34	2.83	1.61	1.22	0.311	0.577	2	3	11.15	1.25	8.87	0.97	0.16	8	+	-	+	+	+	+	nAChRalpha3
chrUn_DS484309v1	232	732	501	*	2.84	3.28	2.21	1.07	0.312	0.578	2	0	4.88	3.33	20.97	0.97	3.9	9	+	-	+	-	-	-
chr2L	20017883	20018383	501	*	2.73	2.16	3.14	-0.99	0.312	0.578	2	1	2.79	3.33	7.26	6.82	4.71	15	+	-	+	-	-	+	CG43861
chr2R	20716953	20717453	501	*	3.75	3.21	4.14	-0.93	0.314	0.58	3	3	6.97	7.07	13.71	29.24	1.79	22	+	+	+	+	+	+	dpr1
chr2L	13358072	13358572	501	*	2.37	2.82	1.71	1.11	0.315	0.581	3	3	4.18	2.49	14.52	0.97	0.81	8	+	+	+	+	+	+	CG9395
chr3R	29325994	29326494	501	*	2.43	2.81	1.9	0.92	0.315	0.581	3	3	5.58	6.65	8.87	3.9	2.27	5	+	+	+	+	+	+
chrX	11933442	11933942	501	*	4.56	4.86	4.18	0.68	0.315	0.581	2	0	37.63	11.64	37.91	31.19	4.06	19	+	-	+	-	-	-	CG10362
chr2L	12161572	12162072	501	*	3.71	4.06	3.24	0.83	0.316	0.581	1	1	17.42	3.74	29.04	11.7	3.57	13	+	-	-	-	-	+	CG31760
chr3L	5869550	5870050	501	*	3.92	3.52	4.23	-0.71	0.316	0.581	1	1	7.67	18.7	8.07	15.59	28.74	12	-	+	-	-	+	-	CG5568
chrX	7117526	7118026	501	*	3.7	3.19	4.07	-0.89	0.317	0.582	0	2	3.48	1.25	22.59	15.59	13.96	21	-	-	-	-	+	+
chr3L	11158641	11159141	501	*	7.31	7.61	6.91	0.7	0.319	0.584	3	3	169.34	87.29	330.74	168.62	32.96	160	+	+	+	+	+	+	IRSp53
chr2R	14534200	14534700	501	*	2.35	1.61	2.83	-1.22	0.319	0.584	2	3	0.7	0.42	8.07	8.77	1.62	11	+	-	+	+	+	+	ttv
chr3L	20610212	20610712	501	*	3.4	3.79	2.87	0.92	0.319	0.584	1	3	14.63	7.48	19.36	2.92	0.97	18	+	-	-	+	+	+	knrl
chrX	5205812	5206312	501	*	3.71	4.03	3.29	0.74	0.32	0.584	3	1	11.15	9.56	28.23	12.67	4.71	12	+	+	+	-	+	-	CG15465
chr3L	20442876	20443376	501	*	2.75	2.17	3.16	-0.98	0.321	0.586	2	0	2.09	4.16	7.26	12.67	4.06	10	+	-	+	-	-	-	CG5910
chrX	5598830	5599330	501	*	3.26	2.7	3.66	-0.96	0.323	0.589	3	1	9.76	1.66	8.07	8.77	4.06	25	+	+	+	-	-	+	Vsx1
chr3L	8456285	8456785	501	*	3.04	2.49	3.43	-0.94	0.326	0.593	3	3	4.18	5.4	7.26	20.47	3.9	8	+	+	+	+	+	+	Gug
chr2L	13633332	13633832	501	*	4.29	4.59	3.91	0.68	0.326	0.593	1	3	28.57	11.22	32.27	12.67	4.38	28	+	-	-	+	+	+	kuz
chr2R	2169018	2169518	501	*	4.08	4.39	3.67	0.72	0.326	0.593	3	3	19.51	9.56	33.88	12.67	3.57	22	+	+	+	+	+	+	CG17684
chr3R	11489593	11490093	501	*	3.12	2.52	3.55	-1.03	0.327	0.594	1	2	9.76	4.99	2.42	19.49	1.62	14	+	-	-	+	-	+
chrX	13498707	13499207	501	*	2.65	3.03	2.13	0.9	0.328	0.594	3	3	11.85	4.57	8.07	3.9	3.25	6	+	+	+	+	+	+	Neto
chr2R	1255970	1256470	501	*	5.38	5.65	5.05	0.6	0.328	0.594	3	3	36.24	23.69	91.16	46.78	12.83	40	+	+	+	+	+	+
chr3R	26947152	26947652	501	*	4.32	4.59	3.98	0.61	0.329	0.594	3	3	41.81	15.79	14.52	18.52	13.8	15	+	+	+	+	+	+	CG14252
chr2L	944972	945472	501	*	2.61	1.91	3.07	-1.16	0.329	0.594	1	1	7.67	0.42	3.23	7.8	1.46	16	+	-	-	-	-	+	CG4341
chrX	22681784	22682284	501	*	7.98	8.27	7.63	0.64	0.329	0.594	3	3	294.09	157.53	471.91	233.92	88.82	270	+	+	+	+	+	+	FBgn0266348
chrX	14761981	14762806	826	*	5.06	5.34	4.7	0.65	0.333	0.601	2	3	54.36	14.13	53.24	33.14	5.68	39	+	-	+	+	+	+	CG15890
chr2R	8122011	8122511	501	*	3.4	2.98	3.73	-0.76	0.334	0.601	0	2	6.97	2.91	13.71	15.59	15.26	9	-	-	-	-	+	+	Nup50
chr2R	13576074	13576574	501	*	2.56	1.9	3.01	-1.11	0.335	0.602	1	1	2.09	7.48	1.61	15.59	6.5	2	+	-	-	-	+	-	CG42808
chrX	21653908	21654408	501	*	2.89	3.31	2.31	0.99	0.335	0.602	2	0	4.18	2.08	23.39	7.8	2.11	5	+	-	+	-	-	-	FBgn0267704
chr3L	19026609	19027109	501	*	4.93	4.56	5.22	-0.66	0.336	0.602	1	3	34.84	11.64	24.2	56.53	9.09	46	+	-	-	+	+	+	nkd
chrX	18201408	18201908	501	*	2.37	2.8	1.75	1.06	0.336	0.602	1	2	11.15	2.49	7.26	3.9	0.16	6	+	-	-	+	-	+	Frq2
chr3L	11561812	11562312	501	*	2.94	2.35	3.35	-1	0.336	0.602	1	1	6.27	6.65	2.42	21.44	7.14	2	+	-	-	+	-	-	CG7394
chr3L	8034957	8035457	501	*	2.52	2.95	1.91	1.03	0.337	0.602	1	2	9.76	1.25	12.1	4.87	3.41	3	+	-	-	+	+	-	nmo
chr3R	9985787	9986287	501	*	4.11	3.75	4.4	-0.65	0.337	0.602	1	2	11.85	10.81	17.75	34.11	12.34	17	+	-	-	+	+	-	Art4
chr3R	10282050	10282550	501	*	2.71	3.13	2.12	1.02	0.337	0.602	2	0	5.58	5.4	15.33	5.85	0.16	7	+	-	+	-	-	-	Nuak1
chr3L	23995558	23996058	501	*	5.23	5.49	4.92	0.57	0.338	0.604	3	3	43.9	20.37	70.18	49.71	12.83	28	+	+	+	+	+	+
chr3R	13516825	13517539	715	*	4.01	4.36	3.55	0.8	0.341	0.607	2	3	35.54	3.33	22.59	19.49	2.76	13	+	-	+	+	+	+
chrY_CP007107v1_random	57247	57747	501	*	9.33	9.62	8.96	0.66	0.341	0.607	3	3	781.21	426.05	1152.75	614.05	187.38	693	+	+	+	+	+	+
chr3R	15292111	15292611	501	*	3.16	2.59	3.57	-0.99	0.342	0.607	2	3	11.15	0.42	6.45	20.47	4.22	11	+	-	+	+	+	+	Tm1
chrX	9023618	9024118	501	*	3.48	2.9	3.9	-1	0.342	0.607	1	1	9.06	0.42	12.91	23.39	2.27	19	+	-	-	+	-	-	rdgA
chr3R	13985135	13985635	501	*	3.03	2.49	3.42	-0.94	0.342	0.608	1	2	3.48	0.42	12.91	10.72	9.42	12	+	-	-	-	+	+	rdx
chr3R	2129162	2129662	501	*	2.5	2.89	1.98	0.91	0.346	0.612	2	1	8.36	3.33	10.49	3.9	2.92	5	+	-	+	-	-	+	Myo81F
chr3R	24749234	24749734	501	*	5.66	5.42	5.87	-0.46	0.346	0.612	3	2	37.63	51.96	38.72	38.99	69.98	67	+	+	+	-	+	+	tld
chr3L	16445930	16446430	501	*	5.73	5.99	5.42	0.58	0.346	0.612	3	3	45.99	32.01	112.94	52.63	16.4	59	+	+	+	+	+	+	CG33158
chr3R	25684846	25685346	501	*	3.03	2.48	3.43	-0.95	0.346	0.612	0	2	6.97	1.66	8.07	0.97	10.39	21	-	-	-	-	+	+	RpL27
chr2L	6971640	6972140	501	*	4.04	3.71	4.31	-0.6	0.348	0.612	1	1	12.54	16.21	10.49	22.42	26.14	11	-	+	-	-	+	-	snRNP-U1-70K
chrX	19264326	19264826	501	*	2.69	2.21	3.06	-0.85	0.348	0.612	3	3	4.88	3.33	5.65	6.82	7.14	11	+	+	+	+	+	+	Vav
chrX	7040263	7040763	501	*	4.78	4.53	5	-0.46	0.349	0.612	1	1	23	17.46	29.04	30.22	44.49	21	-	-	+	-	+	-	CG12541
chr2L	11541079	11541579	501	*	3.35	3.71	2.87	0.83	0.349	0.612	3	3	10.45	2.91	25.81	8.77	4.22	9	+	+	+	+	+	+
chrX	7317958	7318458	501	*	10.96	11.26	10.58	0.67	0.349	0.612	3	3	2329.7	1167.57	3856.75	2074.12	529.83	2004	+	+	+	+	+	+	CG1677
chr3L	458724	459224	501	*	5.58	5.83	5.28	0.55	0.349	0.612	2	3	36.24	32.01	102.45	46.78	18.84	51	+	-	+	+	+	+	klar
chr3L	25014137	25014637	501	*	4.33	4.59	4	0.6	0.349	0.612	3	3	21.6	14.55	36.3	18.52	5.36	24	+	+	+	+	+	+
chrX_DS483971v1_random	1817	2317	501	*	3.01	3.45	2.39	1.06	0.349	0.612	1	1	9.06	22.86	0.81	1.95	9.74	4	-	+	-	-	+	-
chrX	17733286	17733786	501	*	3.67	3.97	3.29	0.67	0.35	0.613	2	3	13.94	8.73	24.2	10.72	6.66	12	+	-	+	+	+	+	CG42684
chr2L	20111873	20112373	501	*	4.46	4.75	4.1	0.64	0.352	0.615	1	1	25.78	11.22	43.56	31.19	4.38	16	+	-	-	-	-	+
chr2L	23157536	23158036	501	*	6.06	6.31	5.76	0.55	0.352	0.615	3	3	73.17	42.81	122.62	69.2	20.46	73	+	+	+	+	+	+
chrX	7092774	7093274	501	*	4.91	4.63	5.14	-0.51	0.353	0.615	1	2	12.54	19.95	41.95	38.99	30.04	37	-	-	+	+	+	-	Sxl
chrX	18132374	18132874	501	*	3.05	2.47	3.46	-0.98	0.354	0.617	3	3	9.76	0.42	6.45	19.49	3.41	10	+	+	+	+	+	+	ari-1
chrX	11111532	11112032	501	*	4.13	4.45	3.72	0.72	0.354	0.617	1	1	29.97	12.05	23.39	30.22	2.44	7	+	-	-	+	-	-	Hsp60A
chr2L	10864924	10865424	501	*	2.34	2.76	1.75	1.01	0.356	0.617	2	1	4.88	4.99	10.49	1.95	0.16	8	+	-	+	+	-	-	FBgn0264351
chr2L	8565167	8565667	501	*	2.53	2.97	1.89	1.08	0.356	0.617	2	2	9.76	0.83	12.91	8.77	0.32	2	+	-	+	+	-	+	Sema1a
chr2R	9977744	9978244	501	*	5.03	4.79	5.24	-0.45	0.356	0.617	2	2	26.48	34.08	22.59	33.14	41.08	39	+	+	-	+	+	-	eve
chrX	4753952	4754452	501	*	4.19	4.48	3.83	0.66	0.356	0.617	3	3	20.91	9.14	37.11	26.32	6.33	10	+	+	+	+	+	+
chrX	4983777	4984277	501	*	2.37	2.78	1.79	0.99	0.356	0.617	2	3	4.88	1.25	14.52	3.9	1.46	5	+	-	+	+	+	+	FBgn0266096
chr2L	6967336	6967836	501	*	4.11	3.8	4.37	-0.57	0.357	0.618	1	1	18.12	8.31	15.33	24.37	20.46	17	+	-	-	-	+	-	smt3
chr3R	5701000	5701500	501	*	2.45	2.84	1.91	0.93	0.358	0.618	3	3	2.79	5.82	12.91	3.9	3.41	4	+	+	+	+	+	+	plx
chrX	5222040	5222540	501	*	2.92	3.31	2.39	0.91	0.36	0.621	1	1	11.85	2.49	15.33	2.92	5.85	7	+	-	-	-	+	-	CG15465
chr3R	9116346	9116846	501	*	2.44	2.87	1.84	1.03	0.361	0.622	1	3	14.63	1.66	5.65	0.97	3.73	6	+	-	-	+	+	+	pum
chr3R	4846129	4846629	501	*	4.63	4.32	4.89	-0.57	0.361	0.622	1	1	9.06	14.55	36.3	12.67	35.07	41	-	-	+	-	+	-
chr3R	8573817	8574317	501	*	3.5	3.82	3.1	0.72	0.361	0.622	3	3	19.51	5.82	16.94	10.72	2.92	12	+	+	+	+	+	+
chr3R	26188648	26189148	501	*	4.54	4.28	4.76	-0.48	0.362	0.623	2	1	19.51	18.7	20.17	15.59	33.77	32	-	+	+	-	+	-	CG6073
chr2R	24229677	24230177	501	*	3.52	3.82	3.13	0.7	0.363	0.623	1	2	11.15	10.39	20.97	13.65	2.6	10	+	-	-	+	-	+	CG30419
chr3L	1647496	1647996	501	*	4.13	4.42	3.77	0.65	0.367	0.628	1	1	13.94	27.85	22.59	6.82	22.08	12	-	+	-	-	+	-	Bro
chrY	223155	223655	501	*	3.64	3.96	3.22	0.74	0.367	0.628	2	3	11.15	5.82	29.85	6.82	4.22	17	+	-	+	+	+	+
chr3L	12606741	12607241	501	*	3.09	3.43	2.65	0.77	0.368	0.63	1	1	11.15	4.16	16.94	8.77	3.09	7	+	-	-	+	-	-	caup
chr2L	22151479	22151979	501	*	4.99	4.76	5.19	-0.43	0.369	0.63	1	1	21.6	31.59	28.23	32.16	40.43	37	-	+	-	-	+	-	dunk
chr3L	480062	480562	501	*	3.47	3.81	3.01	0.8	0.369	0.63	2	2	9.76	3.33	29.04	13.65	4.55	6	+	-	+	+	-	+	klar
chr3L	1772474	1772974	501	*	4.33	4.03	4.58	-0.55	0.371	0.633	1	1	11.85	13.72	23.39	10.72	25.98	35	-	-	+	-	+	-	Dhc62B
chrX_DS484611v1_random	60	560	501	*	2.71	2.17	3.1	-0.93	0.371	0.633	3	2	9.06	1.25	3.23	5.85	4.87	15	+	+	+	-	+	+
chrX	12920701	12921201	501	*	3.08	3.45	2.58	0.88	0.373	0.634	1	1	9.76	4.57	18.55	14.62	2.27	1	+	-	-	+	-	-	fne
chr3R	11551159	11551659	501	*	3.13	3.47	2.68	0.8	0.373	0.634	1	3	14.63	4.99	13.71	4.87	1.3	13	+	-	-	+	+	+	CG14708
chr2R	18061831	18062331	501	*	2.77	2.22	3.17	-0.95	0.373	0.634	3	3	4.18	2.49	7.26	20.47	5.52	1	+	+	+	+	+	+	CG34386
chrX	3762332	3762832	501	*	2.63	2.98	2.16	0.82	0.373	0.634	1	2	9.06	4.99	9.68	6.82	3.57	3	+	-	-	-	+	+	Tlk
chr3L	17124502	17125002	501	*	5.88	6.14	5.56	0.58	0.374	0.635	1	3	112.9	40.73	57.27	85.77	11.53	44	+	-	-	+	+	+	Rbp6
chr2R	7326659	7327159	501	*	2.35	1.74	2.78	-1.04	0.375	0.635	1	2	5.58	0.42	4.03	6.82	1.79	12	+	-	-	+	-	+	Dscam1
chrX	3460314	3460814	501	*	3.27	3.65	2.75	0.89	0.376	0.635	2	2	5.58	4.57	27.43	9.75	0.49	10	+	-	+	+	-	+	CG16782
chr2R	5749875	5750375	501	*	4.44	4.73	4.08	0.65	0.376	0.635	1	1	53.66	10.39	15.33	31.19	4.55	15	+	-	-	+	-	-
chrX	5636456	5636956	501	*	4.81	5.04	4.52	0.52	0.376	0.635	2	3	37.63	15.38	45.98	28.27	8.61	32	+	-	+	+	+	+	OtopLa
chrX	8081425	8081925	501	*	2.59	2.02	3	-0.99	0.377	0.635	1	3	2.79	2.08	7.26	15.59	1.46	7	+	-	-	+	+	+	Ldsdh1
chrX	9478467	9478967	501	*	2.66	3.07	2.1	0.97	0.377	0.635	2	3	11.85	0.42	12.91	3.9	1.95	7	+	-	+	+	+	+	mgl
chr2R	20994607	20995107	501	*	2.71	2.19	3.09	-0.9	0.378	0.636	1	1	6.27	6.65	0.81	7.8	7.79	10	+	-	-	-	+	-	dgt3
chr3R	21169547	21170047	501	*	2.49	1.92	2.9	-0.98	0.379	0.638	2	3	2.09	0.42	8.87	7.8	3.57	11	+	-	+	+	+	+	Snmp1
chrX	20500800	20501300	501	*	3.93	3.53	4.25	-0.71	0.38	0.638	1	2	13.94	8.73	12.1	31.19	4.71	21	+	-	-	+	-	+	RhoGAP19D
chr3L	26288055	26288555	501	*	2.41	2.81	1.85	0.96	0.381	0.639	2	0	2.79	3.74	14.52	0.97	0.81	9	+	-	+	-	-	-
chrX	1517898	1518398	501	*	4.57	4.8	4.29	0.51	0.381	0.639	3	3	29.27	13.3	41.14	21.44	10.23	27	+	+	+	+	+	+
chrX	13430337	13430837	501	*	2.32	2.74	1.74	0.99	0.382	0.639	2	1	4.18	2.08	13.71	4.87	0.16	5	+	+	-	-	-	+
chrX	15496337	15496837	501	*	2.77	2.24	3.16	-0.92	0.385	0.644	2	3	5.58	2.91	5.65	0.97	5.85	20	+	-	+	+	+	+	Gmap
chr2L	18535	19035	501	*	2.54	1.98	2.94	-0.96	0.385	0.644	0	2	0.7	7.9	3.23	10.72	6.33	6	-	-	-	+	+	-	l(2)gl
chrX	12743970	12744470	501	*	4.98	4.75	5.19	-0.44	0.387	0.646	2	2	20.91	16.21	43.56	30.22	46.11	33	+	-	+	+	+	-	CG4004
chr2R	2403467	2403967	501	*	7.89	8.15	7.56	0.59	0.387	0.646	3	3	312.21	129.68	413.02	272.91	65.76	228	+	+	+	+	+	+
chr2L	6997254	6997754	501	*	2.9	3.25	2.44	0.82	0.388	0.646	2	2	8.36	2.49	17.75	6.82	3.41	6	+	-	+	-	+	+	uif
chrX	1625293	1625793	501	*	2.33	2.69	1.84	0.85	0.389	0.646	2	3	11.15	4.16	4.03	1.95	1.79	7	+	+	-	+	+	+	Mur2B
chrX	4079414	4079914	501	*	2.58	2.93	2.1	0.83	0.389	0.646	3	3	9.06	4.16	9.68	7.8	3.09	2	+	+	+	+	+	+	CG43689
chr3R	12232044	12232544	501	*	5.68	5.92	5.4	0.52	0.389	0.646	2	1	77.35	44.48	59.69	71.15	10.55	45	+	-	+	+	-	-	Pglym87
chrX	7703087	7703587	501	*	3.8	4.09	3.43	0.66	0.389	0.646	2	3	12.54	6.23	32.27	14.62	6.66	11	+	-	+	+	+	+	CHES-1-like
chr3L	16689969	16690469	501	*	2.39	1.78	2.81	-1.04	0.39	0.646	3	3	9.06	0.42	0.81	11.7	3.41	6	+	+	+	+	+	+	Lasp
chr2L	486826	487326	501	*	2.59	2.06	2.98	-0.92	0.391	0.647	3	3	1.39	6.23	4.84	11.7	3.9	8	+	+	+	+	+	+	ush
chr2L	13321917	13322417	501	*	2.73	3.11	2.23	0.88	0.392	0.648	3	3	11.15	5.82	8.87	4.87	0.16	9	+	+	+	+	+	+	CG43778
chr2R	7380580	7381080	501	*	4.88	4.58	5.13	-0.54	0.393	0.649	2	1	11.15	9.98	50.82	38.99	24.84	41	+	-	+	-	+	-	Dscam1
chr3R	27715904	27716404	501	*	2.91	3.34	2.3	1.03	0.394	0.651	2	0	15.33	1.25	13.71	13.65	0.16	1	+	-	+	-	-	-
chr3R	13395038	13395538	501	*	2.71	3.14	2.1	1.04	0.397	0.655	2	2	3.48	0.42	22.59	9.75	2.11	1	+	-	+	+	+	-	CCHa2
chrX	9689327	9689827	501	*	2.92	2.45	3.27	-0.82	0.399	0.656	1	3	2.79	9.56	4.03	4.87	9.09	15	+	-	-	+	+	+	nej
chr3R	13074493	13074993	501	*	3.29	2.92	3.58	-0.66	0.399	0.656	1	1	10.45	3.33	8.87	12.67	11.2	12	+	-	-	-	+	-	sim
chrX	2841426	2841926	501	*	2.76	3.12	2.28	0.84	0.4	0.658	2	2	13.94	2.49	9.68	9.75	0.81	4	+	+	-	+	-	+	kirre
chr2R	24515042	24515542	501	*	3.13	2.75	3.43	-0.68	0.402	0.659	1	2	6.27	7.48	6.45	5.85	13.48	13	+	-	-	-	+	+	Ir60b
chr3R	18924284	18924784	501	*	2.57	1.98	2.99	-1.01	0.402	0.659	1	1	0.7	7.9	3.23	8.77	2.11	13	+	-	-	-	-	+	Xrp1
chr3R	973270	973770	501	*	3.21	3.51	2.84	0.67	0.402	0.659	1	1	10.45	9.98	13.71	9.75	1.79	10	+	-	-	-	-	+	Myo81F
chr3L	19562078	19562578	501	*	5.47	5.25	5.67	-0.42	0.404	0.661	3	2	31.36	33.25	49.21	67.25	58.13	27	+	+	+	+	+	-	FBgn0262373
chrX	20361482	20361982	501	*	3.95	4.22	3.61	0.6	0.404	0.661	1	1	16.73	11.64	27.43	12.67	3.09	21	+	-	-	-	-	+
chrX	13873890	13874390	501	*	3.7	3.29	4.02	-0.73	0.405	0.661	2	2	9.06	6.65	13.71	20.47	3.25	25	+	-	+	+	-	+	mamo
chrUn_DS485240v1	341	841	501	*	2.94	3.27	2.52	0.74	0.407	0.661	2	3	6.97	4.16	17.75	6.82	3.41	7	+	+	-	+	+	+
chr2R	17460502	17461002	501	*	3.53	3.06	3.89	-0.83	0.407	0.661	1	2	2.79	0.42	21.78	11.7	9.74	23	+	-	-	-	+	+	CG14478
chrX	19895889	19896389	501	*	5.07	5.31	4.77	0.54	0.407	0.661	2	3	33.45	17.04	68.57	26.32	7.79	48	+	-	+	+	+	+	Hers
chrX	5240671	5241171	501	*	3.01	3.39	2.49	0.9	0.407	0.661	3	3	13.24	0.42	17.75	6.82	0.97	9	+	+	+	+	+	+	CG15465
chr2L	2752129	2752629	501	*	5.4	5.11	5.64	-0.53	0.407	0.661	2	3	40.42	11.22	51.63	74.08	20.3	55	+	-	+	+	+	+	Bacc
chrX	8940456	8940956	501	*	2.44	1.88	2.85	-0.96	0.407	0.661	3	3	4.18	0.42	6.45	14.62	1.95	5	+	+	+	+	+	+	rdgA
chr3L	20486374	20486874	501	*	2.3	1.73	2.71	-0.98	0.408	0.661	1	1	4.18	4.16	1.61	6.82	1.79	11	+	-	-	+	-	-	ZnT77C
chr2R	11184488	11184988	501	*	4.42	4.65	4.13	0.52	0.412	0.667	3	3	27.18	12.05	36.3	30.22	7.47	15	+	+	+	+	+	+	shn
chrX	5615632	5616132	501	*	10.53	10.79	10.21	0.58	0.413	0.668	3	3	1771.49	912.78	2614.46	1588.73	414.71	1542	+	+	+	+	+	+	CG34435
chrX	9990891	9991391	501	*	2.37	2.76	1.83	0.93	0.414	0.668	2	2	11.85	0.42	8.07	6.82	0.81	3	+	-	+	+	-	+	CG32694
chrX	15646588	15647088	501	*	5.59	5.38	5.77	-0.39	0.414	0.668	2	3	44.6	29.51	50.82	64.33	45.63	54	+	+	-	+	+	+
chrX	2795651	2796151	501	*	6.48	6.73	6.18	0.55	0.414	0.668	3	3	133.8	56.94	127.46	116.96	14.78	86	+	+	+	+	+	+	FBgn0003996
chr3R	18130524	18131024	501	*	3.34	3.71	2.85	0.86	0.414	0.668	2	3	14.63	0.42	24.2	5.85	1.79	14	+	-	+	+	+	+	sr
chrX	10816790	10817290	501	*	2.64	2.18	2.98	-0.8	0.415	0.669	1	1	6.27	2.49	4.84	11.7	11.04	1	+	-	-	-	+	-	Imp
chr3L	8047854	8048354	501	*	4.25	4.5	3.94	0.56	0.417	0.672	2	1	23.69	12.05	32.27	28.27	3.73	14	+	+	-	+	-	-	nmo
chr2R	8776737	8777237	501	*	2.31	2.72	1.74	0.98	0.418	0.673	2	3	10.45	0.42	8.87	5.85	0.16	4	+	-	+	+	+	+
chr2L	20672383	20672883	501	*	3.15	3.45	2.78	0.67	0.419	0.673	3	3	8.36	7.48	16.94	12.67	2.92	5	+	+	+	+	+	+	CG31678
chrX	16254529	16255029	501	*	2.29	1.83	2.63	-0.8	0.42	0.673	2	1	2.09	4.57	4.03	6.82	8.77	3	+	-	+	-	+	-	FBgn0003920
chrX	15624714	15625214	501	*	4.58	4.36	4.78	-0.42	0.42	0.673	1	1	23.69	15.38	22.59	30.22	25.01	27	-	-	+	-	+	-	sog
chr3R	24590255	24590755	501	*	3.38	2.88	3.75	-0.87	0.42	0.673	0	2	0.7	0.42	20.97	17.54	9.74	13	-	-	-	-	+	+	mld
chrX	7044702	7045202	501	*	3.24	2.86	3.54	-0.68	0.421	0.674	2	3	5.58	4.16	12.1	6.82	9.09	19	+	-	+	+	+	+	CG12541
chrX	14354619	14355119	501	*	2.63	3.01	2.11	0.9	0.422	0.675	2	0	8.36	0.42	15.33	6.82	1.14	5	+	-	+	-	-	-	dpr8
chr3R	17556084	17556584	501	*	3.83	3.44	4.14	-0.7	0.423	0.675	1	3	13.94	4.16	14.52	27.29	3.57	22	+	-	-	+	+	+	Hmx
chr3R	18118544	18119044	501	*	3.23	3.54	2.85	0.69	0.423	0.675	3	3	23	6.23	5.65	4.87	3.73	13	+	+	+	+	+	+	sr
chr3R	8168230	8168730	501	*	5.29	5.53	5	0.53	0.425	0.678	1	1	91.99	23.28	23.39	54.58	9.58	32	+	-	-	+	-	-	grn
chrX	9509391	9509891	501	*	2.29	2.68	1.75	0.93	0.426	0.678	2	2	6.27	0.83	12.1	6.82	2.27	1	-	+	+	+	-	+	CG34028
chrX	3397754	3398254	501	*	3.29	2.94	3.57	-0.63	0.428	0.682	3	3	8.36	3.33	11.29	10.72	9.9	15	+	+	+	+	+	+	CG12535
chr3L	16528247	16528747	501	*	3.32	3.69	2.81	0.88	0.429	0.682	3	3	13.24	2.08	23.39	3.9	0.16	17	+	+	+	+	+	+	CG43373
chrX	13146973	13147473	501	*	3.33	3.6	2.99	0.61	0.43	0.682	2	2	9.06	8.73	18.55	10.72	3.09	10	+	-	+	-	+	+	CG32645
chr3L	26482215	26482715	501	*	3.97	4.24	3.64	0.6	0.43	0.682	2	1	19.51	5.82	31.46	19.49	3.9	14	+	-	+	-	-	+
chr3R	2302196	2302696	501	*	2.3	1.79	2.68	-0.89	0.431	0.682	0	2	3.48	0.42	6.45	8.77	2.44	8	-	-	-	-	+	+	Myo81F
chr2L	12545225	12545725	501	*	3.02	2.58	3.35	-0.78	0.431	0.682	1	1	4.88	3.33	9.68	8.77	2.92	19	+	-	-	-	-	+	bun
chr2L	21539195	21539695	501	*	3.29	2.52	3.79	-1.27	0.431	0.682	3	3	0.7	0.42	16.13	13.65	1.95	26	+	+	+	+	+	+	FBgn0053746
chrX	16462095	16462595	501	*	2.65	2.98	2.21	0.78	0.433	0.685	3	3	12.54	9.56	1.61	8.77	3.09	2	+	+	+	+	+	+	para
chrX	12254124	12254624	501	*	2.41	2.73	2.01	0.72	0.438	0.692	1	1	8.36	6.65	4.84	1.95	2.11	8	+	-	-	-	-	+	Ten-a
chrX	4441690	4442190	501	*	4.36	4.61	4.05	0.56	0.44	0.693	2	2	23	7.48	42.75	21.44	4.38	24	+	-	+	-	+	+	bi
chr3R	16221453	16221953	501	*	2.34	1.85	2.71	-0.87	0.44	0.693	1	1	0.7	0.42	9.68	6.82	5.85	7	+	-	-	-	+	-	FBgn0267203
chrX	10568014	10568514	501	*	3.2	3.49	2.85	0.65	0.44	0.693	3	1	9.76	6.23	17.75	8.77	1.79	11	+	+	+	-	-	+	CG15296
chr2R	22760489	22760989	501	*	3.84	4.28	3.23	1.05	0.443	0.696	1	1	16.03	4.99	37.11	0.97	2.11	25	+	-	-	-	-	+	CG13527
chr3L	4697264	4697764	501	*	4.41	4.65	4.11	0.54	0.445	0.7	2	1	30.66	23.69	20.97	6.82	30.04	15	+	+	-	-	+	-	CG15876
chr3R	29841424	29841924	501	*	3.06	2.62	3.39	-0.77	0.446	0.7	1	1	0.7	1.66	16.13	13.65	12.83	5	+	-	-	-	+	-	Cad99C
chrX	19637714	19638214	501	*	4.09	3.73	4.38	-0.66	0.447	0.701	1	1	16.73	0.42	22.59	24.37	14.29	24	+	-	-	-	+	-	Rcd-1
chrX	15837829	15838329	501	*	2.63	2.97	2.19	0.78	0.448	0.702	3	3	7.67	1.25	14.52	4.87	1.79	7	+	+	+	+	+	+	Chc
chr2L	1651904	1652404	501	*	2.94	3.29	2.48	0.81	0.448	0.702	2	2	8.36	0.83	20.17	2.92	1.79	12	+	-	+	-	+	+	chinmo
chrX	14971014	14971514	501	*	3.23	3.5	2.89	0.61	0.449	0.702	1	3	6.97	10.81	16.13	13.65	2.6	6	+	-	-	+	+	+	eag
chr2R	12454856	12455356	501	*	4.3	4.06	4.51	-0.45	0.449	0.702	1	1	9.06	21.61	19.36	16.57	28.74	23	-	+	-	-	+	-	Lac
chrX	21407326	21407826	501	*	3.12	3.44	2.72	0.72	0.45	0.702	3	3	6.97	3.74	21.78	9.75	0.97	9	+	+	+	+	+	+
chrX	20352352	20352852	501	*	4.76	4.96	4.53	0.44	0.452	0.705	3	3	36.94	15.38	41.14	32.16	8.93	28	+	+	+	+	+	+
chr3R	8277780	8278280	501	*	5.27	5.09	5.44	-0.35	0.453	0.706	1	2	24.39	34.08	43.56	39.96	50.01	40	-	+	-	+	+	-	ato
chrUn_CP007120v1	3236	3736	501	*	4.96	5.16	4.72	0.44	0.454	0.706	2	3	34.84	17.87	54.85	39.96	9.09	30	+	-	+	+	+	+
chrX	5398563	5399063	501	*	5.75	5.96	5.49	0.46	0.455	0.708	3	3	68.3	33.67	84.7	68.23	11.04	56	+	+	+	+	+	+	SK
chr3L	10793437	10793937	501	*	3.91	3.56	4.2	-0.64	0.455	0.708	3	3	17.42	5.82	12.1	33.14	3.9	18	+	+	+	+	+	+	FBgn0265739
chr3R	8699084	8699584	501	*	4.16	3.91	4.36	-0.45	0.456	0.708	0	2	15.33	12.89	16.94	27.29	24.52	10	-	-	-	+	+	-	hb
chrUn_DS485397v1	57	1026	970	*	3.66	3.92	3.35	0.57	0.458	0.71	1	2	11.15	22.86	11.29	9.75	1.79	19	+	-	-	+	-	+
chr2R	22382704	22383204	501	*	3.65	3.29	3.93	-0.64	0.459	0.711	1	2	9.76	7.48	12.1	30.22	4.55	11	+	-	-	+	+	-	CG13506
chr2R	13629550	13630050	501	*	3.43	3.04	3.74	-0.7	0.46	0.711	1	3	10.45	2.91	11.29	19.49	2.6	18	+	-	-	+	+	+	CG17716
chr3R	28964938	28965438	501	*	3.4	3.71	2.99	0.72	0.46	0.711	1	1	16.03	7.9	15.33	10.72	0.16	13	+	-	-	-	-	+	DIP-gamma
chrX	11096844	11097344	501	*	4.96	5.29	4.53	0.76	0.461	0.712	3	3	27.88	13.3	75.83	19.49	4.71	45	+	+	+	+	+	+	CG42249
chrX	8417066	8417566	501	*	3.55	3.83	3.22	0.61	0.461	0.712	3	3	9.76	5.4	27.43	6.82	4.06	17	+	+	+	+	+	+	Trf2
chr2L	9801467	9801967	501	*	2.53	1.99	2.92	-0.94	0.463	0.714	1	1	4.18	1.25	6.45	14.62	0.16	8	+	-	-	+	-	-	nAChRalpha6
chr3L	1100579	1101079	501	*	2.74	2.31	3.08	-0.77	0.463	0.714	3	3	4.18	5.82	4.84	8.77	2.6	14	+	+	+	+	+	+	bab1
chr2R	10898891	10899391	501	*	4.07	3.83	4.28	-0.45	0.464	0.714	0	2	18.12	11.64	12.91	24.37	20.95	13	-	-	-	+	+	-	ND-B14
chrX	20251590	20252090	501	*	2.83	2.42	3.15	-0.73	0.465	0.714	1	1	0.7	1.66	13.71	4.87	12.83	9	-	-	+	-	+	-	Rab10
chr3L	9112034	9112534	501	*	3.2	3.5	2.82	0.67	0.465	0.714	1	2	11.85	7.48	14.52	15.59	0.65	5	-	-	+	+	-	+	bol
chrX	6744069	6744569	501	*	3.82	3.55	4.04	-0.49	0.466	0.714	3	2	6.97	12.05	16.13	18.52	19.81	11	+	+	+	-	+	+	RpL17
chrX	15143369	15143869	501	*	2.98	2.48	3.34	-0.86	0.466	0.714	3	3	13.94	0.42	2.42	12.67	1.79	16	+	+	+	+	+	+	CG9095
chrX	18311258	18311758	501	*	4.41	4.16	4.63	-0.48	0.467	0.716	0	2	5.58	25.35	22.59	26.32	21.11	27	-	-	-	+	+	-	upd1
chrX	14204527	14205027	501	*	3.56	3.83	3.23	0.6	0.468	0.716	2	3	12.54	7.48	22.59	20.47	2.6	5	+	+	-	+	+	+	l(1)G0007
chr3R	20949101	20949601	501	*	4.35	4.07	4.57	-0.5	0.469	0.716	3	3	16.03	7.9	26.62	30.22	10.23	31	+	+	+	+	+	+	Atpalpha
chr3L	16489238	16489738	501	*	3.58	3.29	3.83	-0.54	0.473	0.723	1	2	11.85	4.57	12.91	5.85	16.72	20	+	-	-	-	+	+	CG33158
chr2L	3610577	3611077	501	*	5.41	5.23	5.57	-0.34	0.474	0.723	2	2	27.18	45.72	39.53	47.76	54.4	40	-	+	+	+	+	-
chrX	5072101	5072601	501	*	2.51	2.02	2.88	-0.86	0.475	0.725	2	2	0.7	4.99	6.45	7.8	1.3	13	+	+	-	+	-	+	CG32767
chrX	13593594	13594094	501	*	2.79	3.07	2.43	0.64	0.476	0.725	3	3	12.54	5.4	7.26	10.72	1.46	4	+	+	+	+	+	+	up
chrX	3811138	3811638	501	*	3.05	2.68	3.35	-0.67	0.478	0.727	1	1	3.48	12.47	3.23	4.87	20.62	5	-	+	-	-	+	-	ec
chr2L	12896668	12897168	501	*	5.32	5.53	5.09	0.44	0.48	0.73	2	1	41.12	28.68	68.57	33.14	7.79	61	+	-	+	-	-	+
chr3R	19099295	19099795	501	*	2.55	2.85	2.15	0.7	0.482	0.731	2	0	4.88	8.73	8.07	0.97	4.38	8	+	-	+	-	-	-	CG6040
chr3R	3344662	3345162	501	*	3.45	3.71	3.13	0.58	0.482	0.732	3	3	15.33	3.74	20.17	10.72	3.57	12	+	+	+	+	+	+	spok
chrX	5543967	5544467	501	*	2.32	2.65	1.89	0.76	0.483	0.733	1	2	3.48	2.49	12.91	6.82	0.32	4	+	-	-	+	-	+	Vsx2
chrX	20916427	20916927	501	*	2.94	2.49	3.28	-0.79	0.485	0.734	2	2	6.27	4.16	6.45	18.52	0.65	10	+	-	+	+	-	+	shakB
chr3L	6835192	6835692	501	*	3.73	3.98	3.43	0.55	0.486	0.735	3	3	17.42	4.16	25.81	10.72	5.68	16	+	+	+	+	+	+
chrUn_DS485984v1	97	597	501	*	2.51	2.82	2.11	0.71	0.486	0.735	3	3	11.85	1.25	8.07	5.85	2.11	5	+	+	+	+	+	+
chr3R	5821285	5821785	501	*	4.47	4.67	4.24	0.43	0.488	0.738	1	1	25.09	14.13	37.11	31.19	6.66	19	+	-	-	+	-	-	Hpr1
chr3L	1636846	1637346	501	*	4.41	4.13	4.64	-0.51	0.489	0.738	3	3	29.27	6.23	16.94	40.94	8.77	25	+	+	+	+	+	+	nSyb
chr3L	17660507	17661007	501	*	7.48	7.7	7.23	0.47	0.49	0.739	3	3	193.74	109.73	319.45	207.61	45.3	198	+	+	+	+	+	+	Crtc
chrX	13601458	13602331	874	*	6.54	6.75	6.3	0.46	0.492	0.742	2	3	141.47	53.2	129.07	130.61	18.02	87	+	-	+	+	+	+	up
chr2R	20596450	20596950	501	*	3.91	3.62	4.16	-0.54	0.493	0.742	0	2	18.12	6.65	12.1	30.22	7.31	16	-	-	-	+	-	+	HnRNP-K
chr3R	13497573	13498073	501	*	3.55	3.2	3.83	-0.63	0.494	0.743	3	3	12.54	2.08	12.91	13.65	4.06	25	+	+	+	+	+	+
chr3R	24914815	24915315	501	*	2.46	2.73	2.13	0.6	0.495	0.744	2	0	5.58	6.23	8.07	6.82	2.27	4	+	-	+	-	-	-	CG11168
chr2L	9145865	9146365	501	*	3.43	3.11	3.7	-0.59	0.497	0.745	1	1	2.09	13.3	10.49	9.75	25.17	4	-	+	-	-	+	-	CG32982
chr3L	17350226	17350726	501	*	2.31	1.78	2.7	-0.92	0.497	0.745	1	1	9.06	0.42	0.81	5.85	0.65	13	+	-	-	-	-	+	Mip
chr2L	4853300	4853800	501	*	4.64	4.85	4.39	0.46	0.498	0.745	3	3	34.15	12.05	40.33	45.81	7.96	9	+	+	+	+	+	+	mRpS2
chr3L	7087646	7088146	501	*	2.67	2.16	3.05	-0.88	0.498	0.746	2	3	9.76	1.25	2.42	14.62	0.16	10	+	-	+	+	+	+	Cpr65Ea
chr3L	14173198	14173698	501	*	5.24	5.07	5.39	-0.32	0.5	0.748	3	2	23.69	36.58	40.33	43.86	40.92	41	+	+	+	+	+	-
chrX	13932186	13932686	501	*	2.28	2.57	1.92	0.64	0.501	0.748	3	3	5.58	3.33	8.87	2.92	1.46	7	+	+	+	+	+	+	mamo
chr2R	3531120	3531620	501	*	2.61	2.9	2.24	0.66	0.501	0.748	2	3	9.76	4.57	8.07	5.85	0.32	8	+	-	+	+	+	+
chr3R	11083828	11084328	501	*	3.42	3.69	3.09	0.6	0.502	0.748	2	0	18.82	4.57	15.33	12.67	0.81	12	+	-	+	-	-	-
chr3R	20175655	20176155	501	*	2.69	3.01	2.27	0.74	0.503	0.75	2	0	5.58	1.66	16.94	11.7	1.79	1	+	-	+	-	-	-
chrUn_DS485005v1	414	914	501	*	3.89	4.13	3.6	0.53	0.506	0.753	3	3	9.76	9.56	33.07	25.34	5.03	6	+	+	+	+	+	+
chr2R	18045750	18046250	501	*	3.18	3.43	2.89	0.54	0.507	0.754	2	3	9.06	7.07	16.13	6.82	2.44	13	+	-	+	+	+	+	CG5773
chrX	6461211	6461711	501	*	4.47	4.66	4.24	0.42	0.508	0.754	3	3	36.94	14.13	25.01	30.22	4.55	22	+	+	+	+	+	+	CG42340
chrX	14476236	14476736	501	*	3.61	3.84	3.33	0.5	0.509	0.756	1	1	18.82	7.07	16.94	13.65	2.6	14	+	-	-	+	-	-	CG9411
chr2L	52298	52798	501	*	4.24	4.45	3.99	0.46	0.51	0.756	3	3	9.76	12.47	43.56	22.42	6.33	19	+	+	+	+	+	+	Cda5
chrX	10716545	10717045	501	*	2.69	2.97	2.34	0.63	0.511	0.757	3	3	4.88	4.16	14.52	8.77	3.41	3	+	+	+	+	+	+	stx
chr2L	1975494	1975994	501	*	3.19	2.49	3.66	-1.18	0.512	0.758	3	3	3.48	0.42	12.91	6.82	0.16	31	+	+	+	+	+	+	CG15356
chr2L	1077545	1078045	501	*	4.42	4.22	4.6	-0.39	0.514	0.758	1	1	9.76	12.89	33.07	30.22	28.74	14	-	-	+	-	+	-	S
chr3R	4477436	4477936	501	*	2.73	3	2.4	0.6	0.514	0.758	3	3	12.54	3.33	8.07	3.9	2.92	9	+	+	+	+	+	+	CG14651
chr3L	17349539	17350039	501	*	3.53	3.19	3.81	-0.62	0.514	0.758	1	2	13.24	2.08	12.1	15.59	3.41	23	+	-	-	+	-	+	Mip
chrX	19298428	19298928	501	*	3.2	2.83	3.5	-0.67	0.515	0.758	3	3	0.7	1.25	19.36	16.57	12.34	5	+	+	+	+	+	+	CG8034
chr3R	23199028	23199528	501	*	3.38	3.62	3.1	0.53	0.515	0.758	2	3	9.76	6.23	20.97	14.62	5.03	6	+	-	+	+	+	+	cnc
chr3R	31702241	31702741	501	*	2.45	2.82	1.96	0.86	0.515	0.758	1	1	11.85	0.42	8.87	0.97	6.66	4	+	-	-	-	+	-
chr3R	3374101	3374601	501	*	4.43	4.2	4.62	-0.42	0.515	0.758	1	2	22.3	6.23	26.62	22.42	16.4	35	+	-	-	-	+	+
chr2R	20502824	20503324	501	*	2.85	3.14	2.5	0.64	0.519	0.762	2	2	10.45	7.9	8.07	6.82	0.16	10	+	-	+	+	-	+	Obp57c
chr2R	8668673	8669173	501	*	2.39	2.72	1.97	0.75	0.519	0.762	2	3	3.48	4.99	11.29	4.87	5.85	1	+	+	-	+	+	+	Acsl
chr3L	26495347	26495847	501	*	5.12	5.3	4.93	0.37	0.52	0.763	2	2	39.03	24.94	54.05	52.63	9.58	29	+	+	-	+	-	+
chrX	4445734	4446234	501	*	2.89	2.48	3.21	-0.72	0.521	0.763	1	1	9.06	2.08	5.65	11.7	0.97	15	+	-	-	-	-	+	bi
chr2L	3833864	3834364	501	*	4.67	4.49	4.83	-0.34	0.524	0.767	1	1	13.94	30.76	22.59	28.27	36.86	20	-	+	-	-	+	-	slp2
chr2R	13712446	13712946	501	*	3.6	3.28	3.86	-0.58	0.524	0.767	3	3	7.67	6.23	15.33	14.62	3.09	26	+	+	+	+	+	+	CG17716
chr3R	27376281	27376781	501	*	2.57	2.82	2.27	0.56	0.525	0.768	1	2	9.76	4.99	6.45	7.8	1.62	5	+	-	-	+	-	+	side
chr3R	9960029	9960529	501	*	4.13	4.36	3.86	0.5	0.526	0.768	2	2	19.51	4.99	37.11	24.37	3.09	16	+	-	+	-	+	+	Glut4EF
chrX	6205795	6206295	501	*	2.91	2.51	3.22	-0.7	0.526	0.768	1	2	11.85	1.25	4.03	7.8	2.11	18	+	-	-	+	-	+
chrX	6656729	6657229	501	*	2.56	2.17	2.86	-0.69	0.527	0.769	1	3	9.06	1.25	3.23	14.62	5.2	2	+	-	-	+	+	+	Cdc7
chr2R	10042872	10043372	501	*	2.59	2.85	2.26	0.59	0.528	0.769	2	0	9.06	2.91	9.68	3.9	1.46	9	+	-	+	-	-	-	oys
chr2R	22069765	22070265	501	*	5.53	5.69	5.34	0.35	0.528	0.769	1	1	56.45	30.34	68.57	48.73	15.1	58	-	-	+	-	-	+	CG11475
chr3R	22485642	22486142	501	*	3.37	3.02	3.66	-0.64	0.529	0.769	1	2	14.63	1.66	8.07	21.44	2.44	14	+	-	-	+	-	+	Nrx-1
chr3L	10810768	10811268	501	*	3.46	3.22	3.67	-0.45	0.53	0.769	2	2	7.67	5.82	14.52	13.65	17.54	7	+	+	-	+	+	-
chr3R	6990737	6991237	501	*	3.13	3.39	2.8	0.59	0.531	0.769	2	1	10.45	2.49	18.55	8.77	1.14	11	+	-	+	+	-	-	Antp
chr3R	28042849	28043349	501	*	2.58	2.13	2.93	-0.8	0.531	0.769	1	3	2.09	3.74	7.26	11.7	0.16	11	+	-	-	+	+	+	trv
chr2L	543943	544443	501	*	3.75	3.97	3.5	0.47	0.532	0.769	1	1	17.42	19.95	9.68	14.62	14.29	5	-	+	-	-	+	-	lwr
chrX	17966004	17966504	501	*	3.06	2.73	3.33	-0.6	0.532	0.769	1	2	9.76	2.91	7.26	13.65	3.57	13	+	-	-	+	-	+	Sh
chrX	4016707	4017207	501	*	3.14	3.45	2.75	0.69	0.532	0.769	2	3	15.33	0.42	16.94	10.72	0.49	9	+	-	+	+	+	+
chrX	10799937	10800437	501	*	4.74	4.89	4.56	0.32	0.532	0.769	3	3	33.45	20.78	34.69	34.11	10.88	26	+	+	+	+	+	+	Imp
chr3L	20981230	20981730	501	*	4.07	4.26	3.85	0.42	0.533	0.769	1	1	21.6	16.63	19.36	8.77	17.37	17	+	-	-	-	+	-
chr3R	20753464	20753964	501	*	3.31	2.92	3.61	-0.69	0.534	0.77	1	1	2.09	0.42	20.17	17.54	3.09	16	-	-	+	-	-	+	Syp
chrX	14530489	14530989	501	*	2.35	1.85	2.72	-0.87	0.535	0.771	2	3	0.7	0.42	9.68	14.62	0.16	5	+	-	+	+	+	+
chrX	18626971	18627471	501	*	3.1	2.79	3.35	-0.56	0.536	0.771	0	2	4.88	6.23	9.68	3.9	7.79	19	-	-	-	+	+	-	wgn
chrX	13517936	13518436	501	*	3.08	3.37	2.73	0.64	0.536	0.771	3	3	11.85	3.74	15.33	11.7	0.16	8	+	+	+	+	+	+	Neto
chr3L	24147152	24147652	501	*	4.44	4.66	4.19	0.47	0.536	0.771	1	1	37.63	4.16	33.88	35.09	5.52	14	+	-	-	+	-	-	Snap25
chrX	20691204	20691704	501	*	4.83	4.63	5	-0.37	0.537	0.772	1	1	27.18	39.07	8.07	28.27	38.81	29	-	+	-	-	+	-	run
chrX	18159028	18159528	501	*	2.82	3.05	2.55	0.5	0.538	0.772	1	1	9.76	6.23	8.87	8.77	2.76	6	+	-	-	+	-	-	Frq1
chrUn_DS483562v1	33854	34354	501	*	3.1	3.34	2.81	0.53	0.539	0.773	3	2	8.36	5.82	16.13	9.75	1.3	10	+	+	+	+	-	+
chr2R	15112774	15113274	501	*	2.49	2.07	2.81	-0.73	0.541	0.775	2	0	2.79	5.82	4.03	11.7	1.3	8	+	-	+	-	-	-	chn
chr3R	30849811	30850311	501	*	4.92	4.74	5.08	-0.34	0.545	0.78	2	1	11.15	36.16	33.07	21.44	44	36	-	+	+	-	+	-	tll
chr2R	21242107	21242607	501	*	2.71	2.27	3.04	-0.77	0.546	0.781	2	1	5.58	0.83	8.07	15.59	0.16	9	+	-	+	+	-	-	ASPP
chr3L	22065669	22066169	501	*	4.29	4.1	4.46	-0.37	0.547	0.781	1	1	18.82	22.86	9.68	16.57	37.67	12	-	+	-	-	+	-	CG14561
chr2L	19866655	19867155	501	*	4.84	4.67	5	-0.32	0.548	0.782	2	1	13.24	23.69	39.53	18.52	38.16	39	-	+	+	-	+	-	sick
chr3R	5892300	5892800	501	*	2.91	3.13	2.66	0.48	0.549	0.782	2	1	8.36	7.48	10.49	7.8	2.11	9	+	+	-	-	-	+	side-III
chrX	15435994	15436494	501	*	4.63	4.79	4.45	0.34	0.549	0.782	3	3	32.06	23.69	27.43	32.16	5.52	28	+	+	+	+	+	+	Cngl
chr2L	4651036	4651536	501	*	3.87	4.07	3.63	0.44	0.55	0.783	2	3	18.82	17.87	13.71	15.59	1.62	20	+	+	-	+	+	+	CG3355
chrX	16562239	16562739	501	*	2.87	2.52	3.15	-0.64	0.55	0.783	2	3	6.27	0.42	10.49	7.8	3.9	15	+	-	+	+	+	+	Pp2B-14D
chrUn_DS483670v1	11413	11913	501	*	3	3.24	2.7	0.54	0.551	0.784	1	1	15.33	3.33	9.68	4.87	1.62	13	+	-	-	-	-	+
chr3R	3055606	3056106	501	*	2.69	2.95	2.37	0.58	0.552	0.784	2	1	4.88	4.57	13.71	1.95	3.57	10	+	+	-	-	+	-	FBgn0267430
chr2L	12849605	12850105	501	*	4.04	4.23	3.84	0.39	0.552	0.784	2	1	17.42	12.89	25.81	19.49	4.38	19	+	+	-	+	-	-
chrX	20231309	20231809	501	*	4.31	4.05	4.52	-0.47	0.554	0.786	1	1	30.66	5.4	13.71	42.89	7.96	18	+	-	-	+	-	-	sw
chr2L	490477	490977	501	*	4.83	4.65	4.98	-0.33	0.555	0.786	3	3	21.6	14.96	38.72	29.24	21.6	44	+	+	+	+	+	+	ush
chrX	14544606	14545106	501	*	2.91	3.19	2.56	0.63	0.557	0.788	2	2	7.67	0.42	19.36	8.77	2.92	6	+	-	+	+	-	+	FBgn0267077
chrX	17990327	17990827	501	*	2.43	2.7	2.11	0.59	0.558	0.789	3	3	5.58	6.65	7.26	8.77	0.16	4	+	+	+	+	+	+	Sh
chrX	9581791	9582291	501	*	3.08	3.34	2.77	0.58	0.559	0.789	2	2	19.51	2.08	8.87	9.75	0.65	10	+	-	+	+	-	+	LPCAT
chr3L	4694728	4695228	501	*	5.45	5.3	5.59	-0.29	0.559	0.789	3	1	23.69	45.31	49.21	56.53	47.09	41	+	+	+	-	+	-	CG15876
chrX	4861123	4861623	501	*	2.41	2.64	2.13	0.5	0.561	0.791	2	0	5.58	5.82	7.26	4.87	1.3	7	+	-	+	-	-	-	CG42594
chr2R	12971801	12972301	501	*	4.31	4.08	4.51	-0.42	0.562	0.791	1	2	34.15	7.07	9.68	26.32	12.83	29	+	-	-	-	+	+	Psc
chr3R	11071211	11071711	501	*	3.22	3.46	2.93	0.53	0.563	0.791	2	3	13.94	2.91	16.13	9.75	1.14	12	+	-	+	+	+	+
chr3L	4227057	4227557	501	*	3.5	3.28	3.69	-0.41	0.563	0.791	1	1	13.24	3.74	12.1	12.67	16.08	10	+	-	-	-	+	-	ImpL2
chrX	3277963	3278463	501	*	2.6	2.17	2.94	-0.77	0.564	0.791	1	2	4.18	0.42	8.87	5.85	0.16	17	+	-	-	+	-	+	dnc
chr2R	14986735	14987235	501	*	2.91	2.62	3.15	-0.54	0.564	0.791	2	2	2.09	6.65	9.68	10.72	6.98	9	+	-	+	+	-	+	pcs
chrX	4422060	4422560	501	*	3.92	3.68	4.12	-0.45	0.564	0.791	1	2	13.24	4.16	20.97	19.49	8.77	24	+	-	-	-	+	+	bi
chr3R	24218560	24219060	501	*	3.3	3.01	3.54	-0.53	0.565	0.791	2	2	4.18	7.9	12.1	23.39	7.47	4	+	+	-	+	+	-	twin
chr2L	13227301	13227801	501	*	5.95	5.8	6.07	-0.27	0.565	0.791	3	3	44.6	65.67	57.27	54.58	90.61	57	+	+	+	+	+	+	CG15480
chr3R	14944710	14945210	501	*	2.47	2.75	2.12	0.63	0.565	0.791	2	2	5.58	2.49	12.1	3.9	0.16	9	+	-	+	+	-	+
chrX	7928866	7929366	501	*	5.73	5.88	5.55	0.33	0.565	0.791	2	1	79.45	37.41	59.69	71.15	15.75	54	+	-	+	+	-	-	mahe
chrX	23375199	23375699	501	*	3.63	3.83	3.38	0.45	0.568	0.792	3	2	22.3	10.81	9.68	8.77	13.48	9	+	+	+	+	+	-
chrX	8048909	8049409	501	*	4.96	5.13	4.77	0.35	0.568	0.792	2	2	32.06	17.04	55.66	39.96	7.14	35	+	-	+	+	-	+	fs(1)h
chrX	2136140	2136640	501	*	3	2.68	3.27	-0.6	0.568	0.792	0	2	1.39	0.83	16.94	13.65	6.33	9	-	-	-	+	+	-	ph-p
chr2L	6149324	6149824	501	*	4.04	4.25	3.81	0.44	0.569	0.792	3	3	27.18	10.39	19.36	17.54	1.46	23	+	+	+	+	+	+	Muc26B
chr3R	20698637	20699137	501	*	3.17	3.44	2.85	0.59	0.569	0.792	3	3	16.73	2.08	13.71	18.52	2.11	1	+	+	+	+	+	+	Oamb
chrX	12119340	12119840	501	*	2.46	2.74	2.12	0.63	0.57	0.793	3	3	8.36	0.42	11.29	3.9	2.11	7	+	+	+	+	+	+	Ten-a
chr3L	957949	958449	501	*	2.88	3.15	2.55	0.6	0.57	0.793	2	0	15.33	1.66	9.68	14.62	1.95	1	+	-	+	-	-	-	Glut1
chrX	19826522	19827022	501	*	2.79	3.03	2.5	0.53	0.572	0.794	2	2	8.36	2.49	13.71	6.82	1.14	9	+	-	+	+	-	+	SkpE
chr2R	16036622	16037122	501	*	3.58	3.27	3.84	-0.57	0.573	0.794	1	1	19.51	4.57	4.84	30.22	2.6	10	+	-	-	+	-	-	SP2353
chrX	17997159	17997659	501	*	2.82	2.46	3.1	-0.65	0.575	0.796	1	1	5.58	0.42	10.49	6.82	1.95	17	+	-	-	-	-	+	Sh
chr2L	15013458	15013958	501	*	5.51	5.31	5.69	-0.38	0.576	0.797	3	3	33.45	13.3	72.6	55.56	19.32	80	+	+	+	+	+	+	GABA-B-R1
chrX	20999027	20999527	501	*	4.65	4.8	4.47	0.33	0.579	0.801	1	3	37.63	13.72	32.27	25.34	7.31	34	+	-	-	+	+	+
chr2R	13490053	13490952	900	*	4.76	4.94	4.55	0.38	0.58	0.802	2	1	35.54	7.9	48.4	35.09	5.36	30	+	-	+	+	-	-	bbc
chrX	6733492	6733992	501	*	5.18	5.33	5.01	0.32	0.58	0.802	3	3	44.6	23.28	52.43	53.61	9.9	33	+	+	+	+	+	+	CG3168
chr3R	9204497	9204997	501	*	4.32	4.5	4.11	0.39	0.582	0.802	2	3	29.97	11.22	26.62	24.37	2.44	25	+	-	+	+	+	+	pum
chr2R	16505814	16506314	501	*	2.34	1.95	2.65	-0.69	0.582	0.802	2	2	0.7	1.25	9.68	7.8	0.97	10	+	+	-	+	-	+	Sema2a
chr3R	14468190	14468690	501	*	5.17	5.32	5	0.32	0.583	0.803	3	3	37.63	25.77	56.47	53.61	8.12	34	+	+	+	+	+	+	cv-c
chr2L	9745683	9746183	501	*	2.3	2.56	1.97	0.59	0.584	0.804	1	3	5.58	1.66	10.49	0.97	1.79	9	+	-	-	+	+	+	Nckx30C
chrX	21010156	21010656	501	*	3.31	3.51	3.08	0.43	0.585	0.805	3	2	10.45	7.48	16.13	15.59	2.76	7	+	+	+	+	-	+
chr2R	13362019	13362519	501	*	2.68	2.91	2.4	0.51	0.586	0.805	2	2	9.06	5.4	8.07	12.67	1.14	2	+	-	+	+	-	+	FBgn0266851
chrX	14926440	14926940	501	*	2.96	3.19	2.69	0.5	0.587	0.805	3	3	9.06	2.91	15.33	5.85	1.46	12	+	+	+	+	+	+	CG9503
chr2R	20916037	20916537	501	*	2.96	3.22	2.64	0.57	0.587	0.805	3	3	3.48	5.82	18.55	8.77	7.96	2	+	+	+	+	+	+	FBgn0020617
chrX	15096551	15097051	501	*	2.64	2.87	2.35	0.52	0.587	0.805	1	2	9.76	3.33	8.87	10.72	2.6	2	+	-	-	+	-	+	Rab3-GEF
chrX	4612492	4612992	501	*	2.8	3.05	2.5	0.55	0.591	0.81	3	3	9.06	3.74	12.1	6.82	0.16	10	+	+	+	+	+	+	FBgn0052773
chrX	13658538	13659038	501	*	2.71	2.35	3	-0.64	0.592	0.811	1	2	7.67	0.42	7.26	19.49	2.44	2	+	-	-	+	-	+	NFAT
chr2L	19811676	19812176	501	*	3.17	2.95	3.36	-0.42	0.593	0.811	1	1	8.36	8.31	6.45	11.7	12.18	7	+	-	-	-	+	-	FBgn0003923
chr2R	10398262	10398762	501	*	4.48	4.63	4.3	0.33	0.595	0.811	2	3	34.15	12.89	27.43	26.32	4.87	28	+	-	+	+	+	+	SLO2
chrX	10493817	10494317	501	*	4.69	4.55	4.82	-0.27	0.595	0.811	1	2	19.51	24.11	26.62	35.09	34.59	15	-	+	-	+	+	-	spri
chrX	12649693	12650193	501	*	3.26	2.99	3.49	-0.5	0.595	0.811	2	3	13.24	3.33	7.26	13.65	4.06	16	+	-	+	+	+	+	Tomosyn
chrX	3333803	3334303	501	*	2.48	2.06	2.8	-0.75	0.595	0.811	3	3	10.45	0.42	1.61	8.77	0.16	12	+	+	+	+	+	+	dnc
chr3R	23859410	23859910	501	*	3.6	3.39	3.79	-0.4	0.596	0.811	1	1	8.36	15.79	7.26	7.8	28.74	5	-	+	-	-	+	-	FBgn0004185
chr3L	19072001	19072501	501	*	2.61	2.22	2.92	-0.71	0.596	0.811	1	1	6.27	0.42	7.26	15.59	0.16	7	+	-	-	+	-	-	Mkp3
chrX	3388733	3389233	501	*	2.96	2.63	3.22	-0.59	0.597	0.812	1	3	15.33	2.49	0.81	16.57	4.38	7	+	-	-	+	+	+	CG12535
chrUn_DS485906v1	84	584	501	*	2.45	2.08	2.75	-0.67	0.598	0.812	3	3	9.76	2.08	0.81	16.57	2.6	1	+	+	+	+	+	+
chr3L	16114006	16114506	501	*	5.28	5.14	5.41	-0.27	0.6	0.813	2	2	24.39	20.78	60.5	46.78	40.76	40	-	+	+	+	+	-	Taf4
chrX	13382213	13382713	501	*	3.16	2.89	3.39	-0.51	0.6	0.813	3	3	13.24	3.33	5.65	4.87	5.68	21	+	+	+	+	+	+	Rbp1-like
chrX	15641732	15642232	501	*	3.04	2.73	3.29	-0.55	0.602	0.815	1	1	9.76	3.74	6.45	4.87	2.44	22	+	-	-	-	-	+	CG8117
chr3R	31192868	31193368	501	*	5.12	4.99	5.24	-0.25	0.602	0.815	2	1	27.88	38.24	29.04	22.42	56.67	34	-	+	+	-	+	-	bnk
chr3R	20477456	20477956	501	*	2.93	3.14	2.69	0.44	0.603	0.815	2	0	7.67	4.99	13.71	7.8	1.62	10	+	-	+	-	-	-	Gfrl
chr3R	24601894	24602394	501	*	2.69	2.93	2.41	0.52	0.604	0.816	3	2	9.76	4.99	8.07	8.77	0.16	7	+	+	+	+	-	+	mld
chr3L	5800070	5800570	501	*	4.53	4.68	4.36	0.33	0.607	0.819	3	3	27.18	12.05	37.91	39.96	7.47	14	+	+	+	+	+	+	CG42272
chr3R	11764324	11764824	501	*	3.67	3.45	3.86	-0.4	0.607	0.819	1	1	9.06	14.13	9.68	1.95	24.52	17	-	+	-	-	+	-	Lk6
chrX	7537291	7537791	501	*	2.51	2.74	2.24	0.49	0.608	0.819	1	1	9.76	5.4	4.84	10.72	0.49	3	+	-	-	+	-	-	CG32719
chr3R	28335421	28335921	501	*	3.47	3.22	3.67	-0.45	0.61	0.822	0	2	0.7	9.56	17.75	13.65	19.65	5	-	-	-	+	+	-	larp
chrX	10724738	10725238	501	*	3.03	2.71	3.29	-0.58	0.611	0.822	2	1	4.18	2.49	12.91	20.47	0.81	8	+	-	+	+	-	-	stx
chrX	3160061	3160561	501	*	3.68	3.85	3.48	0.37	0.612	0.822	2	2	10.45	9.56	23.39	8.77	3.73	21	+	-	+	+	-	+	N
chr2L	18120272	18120772	501	*	2.46	2.13	2.73	-0.6	0.612	0.822	1	2	4.18	3.33	5.65	8.77	1.14	10	+	-	-	+	-	+	CG5758
chrX	17791472	17791972	501	*	2.28	1.93	2.57	-0.63	0.612	0.822	3	3	6.97	2.08	2.42	7.8	0.97	9	+	+	+	+	+	+	OdsH
chr3L	21498351	21498851	501	*	5.59	5.32	5.83	-0.51	0.613	0.822	3	3	32.75	19.12	67.76	51.66	9.42	109	+	+	+	+	+	+	Hr78
chr3L	17059097	17059597	501	*	3.61	3.33	3.84	-0.51	0.614	0.823	1	2	13.94	3.33	12.91	29.24	1.62	12	+	-	-	+	-	+	Rbp6
chrX	5650050	5650550	501	*	2.74	2.96	2.48	0.48	0.615	0.823	2	0	9.06	7.9	6.45	14.62	1.14	1	+	-	+	-	-	-	OtopLa
chr3R	9229963	9230463	501	*	2.48	2.14	2.75	-0.61	0.615	0.823	2	1	0.7	0.42	12.1	9.75	2.44	8	+	-	+	+	-	-	pum
chr3R	15313890	15314390	501	*	2.64	2.87	2.35	0.52	0.615	0.823	2	1	11.85	2.08	8.07	11.7	2.6	1	+	-	+	+	-	-	Tm2
chr2L	4301339	4301839	501	*	3.98	4.15	3.79	0.36	0.616	0.823	3	3	15.33	8.73	29.04	15.59	3.9	22	+	+	+	+	+	+	tutl
chr2L	18152236	18152736	501	*	4.28	4.13	4.42	-0.29	0.617	0.823	1	1	10.45	17.87	24.2	8.77	34.59	21	-	+	-	-	+	-	CG17681
chrX	19548395	19548895	501	*	2.55	2.24	2.8	-0.56	0.617	0.824	0	3	2.79	3.33	8.07	2.92	2.92	15	-	-	-	+	+	+	CG32532
chrX	16579603	16580103	501	*	3.2	3.45	2.9	0.54	0.618	0.824	2	3	9.76	0.42	22.59	13.65	0.81	8	+	-	+	+	+	+	CanA-14F
chr3R	5150088	5150588	501	*	2.78	3.01	2.51	0.5	0.619	0.825	1	2	18.82	4.57	0.81	7.8	1.3	8	+	-	-	-	+	+	dpr16
chr2R	6813939	6814439	501	*	4.67	4.55	4.79	-0.24	0.62	0.825	2	2	22.3	24.52	23.39	26.32	30.53	26	+	+	-	+	+	-	koi
chr2L	15479736	15480236	501	*	4.9	4.76	5.02	-0.25	0.62	0.825	1	1	14.63	35.33	31.46	24.37	40.76	32	-	+	-	-	+	-	sna
chr2R	12249410	12249910	501	*	3.42	3.63	3.17	0.46	0.621	0.825	2	1	13.24	6.23	17.75	21.44	0.65	5	+	-	+	+	-	-	FBgn0265374
chr3R	915486	915986	501	*	4.17	4.34	3.98	0.36	0.621	0.825	1	2	37.63	6.23	16.94	28.27	5.03	14	+	-	-	+	-	+	Myo81F
chrX	19331588	19332088	501	*	3.07	3.3	2.81	0.49	0.625	0.828	2	3	7.67	1.66	20.17	5.85	6.17	9	+	-	+	+	+	+	nAChRalpha7
chr3R	24555717	24556217	501	*	4.18	4	4.33	-0.33	0.626	0.828	0	2	12.54	16.21	19.36	33.14	21.27	6	-	-	-	+	+	-	FBgn0004188
chr2L	19549267	19549767	501	*	3.44	3.22	3.64	-0.42	0.626	0.828	1	3	8.36	8.31	11.29	18.52	5.85	13	+	-	-	+	+	+	CG10337
chr3R	360404	360904	501	*	2.65	2.85	2.42	0.43	0.626	0.828	2	1	4.88	6.23	10.49	3.9	1.14	11	+	-	+	-	-	+
chrUn_DS485808v1	778	1278	501	*	2.48	2.18	2.73	-0.55	0.627	0.828	3	3	8.36	0.42	4.84	11.7	3.25	5	+	+	+	+	+	+
chr3R	13293183	13293683	501	*	5.33	5.21	5.45	-0.23	0.627	0.828	2	2	29.27	48.22	33.88	43.86	49.85	37	-	+	+	+	+	-	wntD
chr3L	592841	593341	501	*	2.61	2.84	2.34	0.5	0.627	0.828	3	1	5.58	5.4	10.49	4.87	6.33	4	+	+	+	-	+	-	MED14
chr2R	18028670	18029170	501	*	4.24	4.4	4.08	0.32	0.628	0.828	2	3	26.48	12.47	24.2	26.32	3.25	21	+	-	+	+	+	+
chr2R	17461964	17462464	501	*	3.84	3.66	4.01	-0.34	0.629	0.828	3	3	8.36	7.07	22.59	23.39	14.78	10	+	+	+	+	+	+	CG14478
chr2R	18032562	18033062	501	*	2.88	3.07	2.66	0.41	0.632	0.832	2	1	9.76	4.16	11.29	11.7	2.27	5	+	+	-	+	-	-
chrX	7049029	7049529	501	*	4.95	4.84	5.06	-0.23	0.632	0.832	1	1	20.91	21.2	43.56	34.11	38.16	28	-	-	+	-	+	-	nullo
chrX	4745604	4746104	501	*	2.77	2.98	2.53	0.44	0.634	0.833	1	1	11.85	2.08	9.68	9.75	1.62	6	+	-	-	+	-	-
chr3L	17964727	17965227	501	*	3.87	4.03	3.69	0.34	0.636	0.835	1	2	25.78	7.9	15.33	17.54	11.2	10	+	-	-	+	+	-	Eip75B
chrX	18234865	18235365	501	*	2.52	2.74	2.26	0.48	0.636	0.835	2	1	14.63	4.57	0.81	8.77	1.62	4	+	+	-	+	-	-
chr2R	15756393	15756893	501	*	4.32	4.46	4.15	0.31	0.637	0.835	2	2	22.3	8.31	35.49	26.32	12.02	15	+	-	+	+	+	-	CG30089
chr2L	27974	28474	501	*	3.59	3.34	3.8	-0.46	0.637	0.835	0	2	2.79	17.04	10.49	26.32	14.45	1	-	-	-	+	+	-	Ir21a
chrX	4052179	4052679	501	*	3.49	3.64	3.32	0.32	0.638	0.835	2	0	16.03	12.47	8.87	11.7	3.25	15	+	-	+	-	-	-	FBgn0267038
chr3R	29583402	29583902	501	*	2.28	1.95	2.55	-0.6	0.638	0.835	1	2	3.48	1.66	6.45	4.87	0.65	12	+	-	-	+	-	+
chr2L	4145078	4145578	501	*	2.92	2.64	3.16	-0.52	0.638	0.835	1	3	11.85	0.42	6.45	9.75	3.09	14	+	-	-	+	+	+
chr3R	20400325	20400825	501	*	3.3	3.47	3.12	0.35	0.639	0.835	3	3	16.03	8.31	8.87	14.62	2.44	9	+	+	+	+	+	+	Gfrl
chrX	13066432	13066932	501	*	3.61	3.76	3.43	0.34	0.639	0.835	2	3	11.85	9.56	19.36	12.67	2.6	17	+	-	+	+	+	+	rad
chr3R	29455280	29455780	501	*	2.76	3	2.49	0.51	0.642	0.836	2	3	9.76	2.08	12.1	12.67	0.16	4	+	-	+	+	+	+	Ptp99A
chrX	5573484	5573984	501	*	2.85	3.04	2.62	0.41	0.642	0.836	1	1	13.24	4.16	7.26	2.92	3.57	12	+	-	-	-	-	+
chr3R	5282791	5283291	501	*	2.91	2.66	3.13	-0.47	0.644	0.837	3	3	3.48	3.33	12.1	6.82	3.41	16	+	+	+	+	+	+	mtd
chr3R	19105143	19105643	501	*	3.73	3.91	3.52	0.39	0.644	0.837	2	1	6.27	4.99	33.88	11.7	3.73	19	+	-	+	+	-	-	CG6040
chr3R	23827643	23828143	501	*	3.18	2.92	3.4	-0.48	0.644	0.837	1	1	6.97	14.13	1.61	18.52	9.09	4	-	+	-	-	+	-	FBgn0004186
chr3R	8534275	8534775	501	*	4.63	4.75	4.49	0.26	0.644	0.837	1	1	35.54	22.03	23.39	36.06	5.52	26	+	-	-	+	-	-
chr3R	20768964	20769464	501	*	5.1	5.24	4.94	0.31	0.645	0.838	3	3	43.9	10.81	58.89	45.81	6.98	39	+	+	+	+	+	+	Syp
chr3R	16431605	16432105	501	*	2.69	2.94	2.4	0.53	0.647	0.839	1	1	6.27	4.57	12.1	2.92	8.93	4	+	-	-	-	+	-	CG17565
chrX_DS484636v1_random	470	970	501	*	3.98	4.12	3.83	0.29	0.648	0.84	2	2	10.45	14.96	26.62	16.57	6.01	20	+	-	+	-	+	+
chrX	13821274	13821774	501	*	3.77	3.56	3.96	-0.4	0.649	0.84	2	3	11.85	1.66	21.78	17.54	6.98	22	+	-	+	+	+	+	Nup93-1
chr3L	3515691	3516191	501	*	3.3	3.11	3.47	-0.36	0.649	0.84	0	2	5.58	4.99	15.33	16.57	11.69	5	-	-	-	+	+	-	Eip63E
chr3L	684981	685481	501	*	5.41	5.26	5.54	-0.29	0.65	0.84	1	1	41.12	16.21	57.27	54.58	19.16	66	+	-	-	-	+	-	CG3386
chr3R	10826697	10827197	501	*	2.4	2.11	2.64	-0.53	0.651	0.841	2	2	2.79	3.74	6.45	13.65	2.11	3	+	+	-	-	+	+	Cad86C
chrX	3649752	3650252	501	*	3.82	3.98	3.64	0.34	0.652	0.841	2	3	17.42	5.82	24.2	23.39	4.06	10	+	-	+	+	+	+	AstA-R1
chr3L	11163486	11163986	501	*	3.45	3.17	3.68	-0.51	0.653	0.842	1	2	1.39	6.23	19.36	12.67	0.81	25	+	-	-	+	-	+	Alg10
chrX	7271316	7271816	501	*	4.27	4.09	4.43	-0.33	0.653	0.842	3	3	24.39	7.48	19.36	37.04	9.42	18	+	+	+	+	+	+	FBgn0265457
chrX	19393128	19393628	501	*	3.16	2.91	3.37	-0.46	0.654	0.842	3	2	5.58	0.83	16.13	11.7	3.41	16	+	+	+	-	+	+	kek5
chr3L	13629348	13629848	501	*	3.25	2.95	3.5	-0.55	0.654	0.842	3	3	11.85	1.66	9.68	8.77	0.16	25	+	+	+	+	+	+	bru3
chr2R	8233435	8233935	501	*	5.44	5.33	5.55	-0.22	0.657	0.844	2	1	23	47.38	50.01	34.11	56.02	50	-	+	+	-	+	-	dpn
chrX	5233052	5233552	501	*	3.07	2.83	3.28	-0.45	0.657	0.844	2	3	11.15	1.25	8.87	10.72	3.41	15	+	-	+	+	+	+	CG15465
chrX	5601806	5602306	501	*	2.44	2.13	2.69	-0.56	0.658	0.844	3	3	6.97	2.91	3.23	11.7	0.65	7	+	+	+	+	+	+	Vsx1
chrX	11307331	11307831	501	*	2.38	2.59	2.12	0.48	0.659	0.845	1	1	11.15	3.74	3.23	11.7	0.32	1	+	-	-	+	-	-
chr3R	22661391	22661891	501	*	3.83	3.99	3.65	0.34	0.66	0.845	2	0	16.03	9.14	22.59	3.9	4.87	29	+	-	+	-	-	-	wake
chrX	1642247	1642747	501	*	4.46	4.28	4.63	-0.34	0.66	0.845	3	3	23.69	14.55	20.17	44.84	5.2	24	+	+	+	+	+	+	Mur2B
chr3L	6282893	6283393	501	*	2.73	2.93	2.51	0.42	0.661	0.845	1	3	6.97	3.74	12.1	12.67	2.44	2	+	-	-	+	+	+
chrX	18554681	18555181	501	*	2.54	2.22	2.79	-0.57	0.662	0.847	2	3	9.06	4.16	0.81	6.82	0.97	13	+	-	+	+	+	+	Bx
chr3L	8013843	8014343	501	*	2.35	2.02	2.62	-0.6	0.663	0.847	1	1	7.67	1.25	3.23	0.97	0.49	17	+	-	-	-	-	+	nmo
chr3L	13737275	13737775	501	*	4	4.16	3.82	0.35	0.664	0.847	3	3	15.33	3.74	34.69	19.49	3.73	19	+	+	+	+	+	+	bru3
chrX	15125298	15125798	501	*	3.07	2.85	3.27	-0.42	0.665	0.849	2	1	9.76	5.4	6.45	14.62	4.22	10	+	+	-	+	-	-	drd
chrX	16231255	16231755	501	*	4.05	3.89	4.2	-0.31	0.667	0.85	2	3	16.73	5.82	21.78	29.24	10.88	15	+	-	+	+	+	+
chr3R	27425987	27426487	501	*	5.39	5.16	5.59	-0.43	0.667	0.85	3	3	34.15	10.81	62.11	64.33	9.74	70	+	+	+	+	+	+	side
chr3L	25414122	25414622	501	*	2.61	2.33	2.84	-0.51	0.67	0.852	1	1	4.18	0.42	10.49	7.8	1.62	12	+	-	-	-	-	+	CG45782
chrX	12313796	12314296	501	*	2.37	2.59	2.13	0.46	0.671	0.853	1	1	11.15	0.42	6.45	7.8	1.3	4	+	-	-	+	-	-	Ten-a
chr3L	7149316	7149816	501	*	2.61	2.83	2.34	0.48	0.673	0.854	1	1	5.58	0.42	15.33	9.75	0.49	5	+	-	-	+	-	-	corn
chrX	1580596	1581096	501	*	3.75	3.54	3.94	-0.39	0.673	0.854	3	3	20.21	7.48	7.26	30.22	3.73	12	+	+	+	+	+	+	Mur2B
chr2L	6156574	6157074	501	*	2.55	2.76	2.31	0.45	0.673	0.854	1	2	9.76	2.49	8.07	11.7	0.16	3	+	-	-	+	-	+	CG31639
chr3R	21589724	21590224	501	*	3.65	3.42	3.84	-0.42	0.674	0.854	3	3	13.24	0.42	18.55	13.65	5.36	24	+	+	+	+	+	+	FBgn0263662
chr3R	6744657	6745157	501	*	4.61	4.5	4.71	-0.21	0.674	0.854	1	1	17.42	26.19	24.2	27.29	32.96	18	-	+	-	-	+	-	zen2
chr3L	5651163	5651663	501	*	2.99	3.19	2.75	0.45	0.676	0.854	2	3	7.67	0.42	19.36	4.87	3.25	12	+	-	+	+	+	+	Blimp-1
chr3R	14472951	14473451	501	*	3.26	3.05	3.44	-0.4	0.676	0.854	2	1	9.76	3.74	11.29	21.44	4.22	7	+	-	+	+	-	-	cv-c
chr3L	10325540	10326040	501	*	3.57	3.37	3.73	-0.36	0.677	0.856	1	2	5.58	4.57	20.97	15.59	6.33	18	-	-	+	-	+	+	FBgn0267668
chr3R	15372014	15372514	501	*	4.01	4.18	3.81	0.37	0.678	0.857	1	1	20.91	27.02	6.45	20.47	20.62	1	+	-	-	-	+	-	CG14868
chr3R	29117330	29117830	501	*	3.97	4.09	3.84	0.25	0.679	0.857	1	1	17.42	16.63	16.94	12.67	13.15	17	+	-	-	-	+	-	Atg14
chr2R	13818231	13818731	501	*	2.94	2.66	3.17	-0.52	0.68	0.857	3	3	5.58	0.42	12.91	17.54	0.49	9	+	+	+	+	+	+	stj
chr4	114625	115125	501	*	4.49	4.63	4.33	0.3	0.68	0.857	2	3	18.82	8.73	46.79	25.34	3.09	32	+	-	+	+	+	+	Ank
chr3R	6755359	6755859	501	*	5.05	4.94	5.15	-0.2	0.68	0.857	2	1	23.69	41.98	26.62	35.09	48.06	23	-	+	+	-	+	-	bcd
chr2L	8541337	8541837	501	*	2.64	2.39	2.85	-0.46	0.682	0.857	1	1	3.48	5.82	6.45	0.97	4.71	16	-	-	+	-	+	-	Sema1a
chr2R	15648619	15649119	501	*	3.4	3.2	3.58	-0.38	0.682	0.857	1	2	6.27	8.31	12.91	21.44	4.38	10	+	-	-	+	-	+	CG42524
chrX	3104192	3104692	501	*	5.05	5.17	4.91	0.25	0.683	0.857	2	3	32.75	19.54	55.66	45.81	5.68	39	+	-	+	+	+	+	kirre
chr2R	16000773	16001273	501	*	3.1	2.92	3.26	-0.34	0.683	0.858	3	3	5.58	7.48	9.68	11.7	8.12	9	+	+	+	+	+	+	ATPCL
chrX	22600457	22600957	501	*	2.29	1.99	2.54	-0.55	0.684	0.858	2	2	9.06	0.42	2.42	9.75	0.65	7	+	-	+	+	-	+	Cda4
chrX	19906918	19907418	501	*	3.15	3.35	2.93	0.42	0.685	0.858	2	2	13.24	0.42	16.94	11.7	1.14	10	+	-	+	+	-	+	Hers
chr3R	14017649	14018149	501	*	3.58	3.38	3.76	-0.38	0.685	0.858	3	3	4.18	1.25	25.81	23.39	9.26	8	+	+	+	+	+	+	rdx
chr3R	3356796	3357296	501	*	2.56	2.71	2.38	0.33	0.686	0.858	1	2	6.97	5.4	7.26	4.87	1.79	9	+	-	-	+	-	+
chr2R	15425083	15425583	501	*	4.38	4.22	4.53	-0.31	0.686	0.858	3	3	23	10.39	22.59	33.14	6.17	30	+	+	+	+	+	+	CG30472
chrX	5354627	5355127	501	*	3.16	3.3	3.01	0.29	0.687	0.858	1	1	13.94	9.14	6.45	10.72	2.44	11	+	-	-	-	-	+	SK
chrX	21413852	21414352	501	*	3.32	3.08	3.52	-0.45	0.688	0.859	2	3	16.73	3.74	4.84	29.24	2.27	3	+	-	+	+	+	+
chrX	21807087	21807587	501	*	3.95	4.09	3.79	0.31	0.689	0.859	3	3	18.82	4.99	27.43	18.52	2.92	20	+	+	+	+	+	+
chr3R	30804266	30804766	501	*	4.61	4.46	4.74	-0.28	0.689	0.859	2	3	28.57	14.96	22.59	43.86	9.42	27	+	+	-	+	+	+	wts
chr3R	27444350	27444850	501	*	4.68	4.79	4.56	0.22	0.691	0.861	2	1	43.21	15.38	24.2	32.16	7.79	31	+	+	-	+	-	-
chr2L	8832440	8832940	501	*	4.86	4.77	4.95	-0.18	0.692	0.861	2	1	25.78	28.68	27.43	21.44	42.06	29	+	+	-	-	+	-
chrX	11322225	11322725	501	*	5.42	5.32	5.51	-0.18	0.694	0.863	3	2	27.88	34.08	58.08	47.76	49.52	39	+	+	+	+	+	-	sisA
chr3R	29219844	29220344	501	*	3.78	3.63	3.91	-0.28	0.694	0.863	1	1	9.06	12.05	16.13	15.59	12.5	17	-	+	-	-	+	-	eEF1gamma
chr2R	14046878	14047378	501	*	2.37	2.6	2.1	0.5	0.695	0.863	1	3	4.88	0.42	12.91	11.7	0.16	1	+	-	-	+	+	+	mam
chr3R	13073098	13073598	501	*	2.67	2.82	2.51	0.31	0.702	0.87	2	2	6.97	4.57	9.68	6.82	2.27	8	+	-	+	+	-	+	sim
chrX	11382538	11383038	501	*	4.97	5.08	4.85	0.23	0.704	0.873	3	3	50.18	12.05	39.53	30.22	8.28	48	+	+	+	+	+	+	dlg1
chr2R	6630680	6631180	501	*	3.87	4	3.74	0.26	0.704	0.873	3	3	11.85	8.73	27.43	11.7	6.33	22	+	+	+	+	+	+	Vha16-1
chrX	4892193	4892693	501	*	3.01	2.77	3.21	-0.44	0.705	0.873	2	3	0.7	2.08	17.75	12.67	2.11	13	+	-	+	+	+	+	CG42594
chrX	23472340	23472840	501	*	3.1	3.24	2.94	0.3	0.706	0.873	0	2	15.33	6.65	6.45	12.67	5.36	5	-	-	-	-	+	+
chrX	3247758	3248258	501	*	2.69	2.45	2.9	-0.45	0.706	0.873	3	3	11.15	1.25	4.03	9.75	1.62	11	+	+	+	+	+	+	dnc
chrX	12640634	12641134	501	*	3.61	3.45	3.75	-0.3	0.706	0.873	3	3	10.45	6.23	16.13	16.57	7.79	16	+	+	+	+	+	+	Tomosyn
chrX	1623127	1623627	501	*	2.39	2.13	2.62	-0.49	0.709	0.875	1	2	4.18	1.66	7.26	3.9	0.49	14	+	-	-	+	-	+	Mur2B
chr3R	26868684	26869184	501	*	3	3.18	2.79	0.39	0.709	0.875	2	2	11.85	0.83	14.52	16.57	1.14	3	+	-	+	+	-	+	His2Av
chrX	16253731	16254231	501	*	2.36	2.08	2.58	-0.5	0.712	0.878	1	1	0.7	11.22	0.81	7.8	5.2	5	+	-	-	-	+	-	FBgn0003920
chr3L	13837418	13837918	501	*	4.25	4.15	4.35	-0.2	0.713	0.878	1	1	9.76	13.72	29.85	12.67	35.56	13	-	-	+	-	+	-	CG43184
chrX	19102324	19102824	501	*	3.05	3.18	2.91	0.27	0.713	0.878	2	3	8.36	8.31	10.49	8.77	1.79	12	+	-	+	+	+	+
chrX	18107870	18108370	501	*	2.91	3.06	2.73	0.33	0.716	0.881	2	3	10.45	2.49	12.1	13.65	2.27	4	+	-	+	+	+	+	wupA
chr3R	24477395	24477895	501	*	2.32	2.51	2.1	0.41	0.717	0.881	1	3	12.54	3.74	0.81	10.72	0.16	2	+	-	-	+	+	+
chrX	8029013	8029513	501	*	4.43	4.28	4.57	-0.29	0.718	0.881	3	3	23.69	8.73	25.81	45.81	5.36	20	+	+	+	+	+	+
chr2R	6494204	6494704	501	*	3.79	3.93	3.64	0.29	0.718	0.881	1	1	12.54	12.05	20.97	10.72	16.56	10	+	-	-	-	+	-
chrX	13520207	13520707	501	*	2.98	3.14	2.79	0.35	0.719	0.881	3	3	6.27	1.66	18.55	13.65	2.11	5	+	+	+	+	+	+	Neto
chr2R	17145661	17146161	501	*	2.58	2.4	2.73	-0.33	0.72	0.882	0	2	0.7	7.07	8.07	2.92	12.02	5	-	-	-	+	+	-	FBgn0050234
chr2L	1119735	1120235	501	*	4.98	4.89	5.07	-0.18	0.721	0.883	2	2	18.82	26.6	43.56	39.96	31.83	29	-	+	+	+	+	-	Pino
chr3R	19035223	19035723	501	*	2.34	2.54	2.12	0.42	0.724	0.884	2	1	2.09	0.83	14.52	4.87	0.16	8	+	+	-	-	-	+	CG6026
chrX	17812165	17812665	501	*	2.63	2.42	2.82	-0.39	0.724	0.884	3	3	6.27	4.99	4.84	15.59	4.55	1	+	+	+	+	+	+	OdsH
chrX	7153859	7154707	849	*	3.73	3.53	3.89	-0.36	0.724	0.884	1	3	12.54	0.42	21.78	9.75	4.87	30	+	-	-	+	+	+	CG9650
chrX	19753955	19754455	501	*	4.56	4.67	4.44	0.22	0.725	0.884	3	3	23	10.39	42.75	25.34	19.81	20	+	+	+	+	+	+	Pmp70
chr2R	13826447	13826947	501	*	4.7	4.57	4.82	-0.25	0.725	0.884	2	3	30.66	10.81	29.85	36.06	9.58	39	+	-	+	+	+	+	fl(2)d
chrX	16305086	16305586	501	*	3.61	3.72	3.49	0.23	0.726	0.884	2	1	20.21	11.22	8.07	17.54	5.2	11	+	-	+	+	-	-	CG3679
chrX	1074041	1074541	501	*	3.54	3.37	3.7	-0.33	0.726	0.884	3	3	16.73	3.74	10.49	10.72	4.22	24	+	+	+	+	+	+	CG3655
chr2L	9467377	9467877	501	*	3.64	3.5	3.77	-0.27	0.726	0.884	2	1	16.03	3.33	14.52	15.59	10.23	15	+	-	+	-	-	+	FBgn0264269
chrX	21226101	21226601	501	*	2.4	2.15	2.61	-0.46	0.727	0.884	1	2	4.88	0.42	8.07	12.67	0.65	5	+	-	-	+	-	+	CG32521
chrX	10738809	10739309	501	*	4.02	4.14	3.89	0.25	0.73	0.887	3	3	16.03	5.4	31.46	17.54	8.93	18	+	+	+	+	+	+	stx
chr2R	12578116	12578616	501	*	4.11	3.96	4.24	-0.28	0.731	0.888	3	3	20.21	6.23	20.17	9.75	7.96	39	+	+	+	+	+	+	Sin3A
chrX	1020886	1021386	501	*	4.3	4.14	4.44	-0.3	0.734	0.889	3	3	26.48	12.05	14.52	43.86	3.41	18	+	+	+	+	+	+	su(w[a])
chr2L	11977669	11978169	501	*	3.97	4.08	3.85	0.23	0.734	0.889	3	3	17.42	17.04	16.13	31.19	3.09	9	+	+	+	+	+	+
chrX	9544366	9544866	501	*	3.81	3.92	3.7	0.22	0.734	0.889	2	3	13.24	9.56	22.59	17.54	6.5	15	+	-	+	+	+	+	CG32700
chrX	18183137	18183637	501	*	3.22	3.37	3.05	0.32	0.735	0.889	2	0	13.94	4.99	12.1	12.67	0.16	12	+	-	+	-	-	-	Frq2
chrX	5189799	5190299	501	*	2.33	2.51	2.12	0.39	0.735	0.889	1	2	6.97	0.42	9.68	4.87	0.16	8	+	-	-	+	-	+	CG15465
chrX	4313177	4313677	501	*	3.79	3.63	3.94	-0.31	0.737	0.891	1	1	19.51	7.07	10.49	22.42	3.57	20	+	-	-	+	-	-	CG15579
chrX	4334342	4334842	501	*	3.03	3.18	2.87	0.31	0.74	0.894	1	1	5.58	8.73	12.91	7.8	0.16	14	+	-	-	-	-	+	norpA
chr2R	15130725	15131225	501	*	6.16	6.08	6.25	-0.17	0.742	0.895	3	2	48.09	59.02	95.19	109.16	63.98	55	+	+	+	+	+	-	chn
chr3L	10747345	10747845	501	*	2.44	2.18	2.66	-0.48	0.743	0.895	1	2	11.15	1.66	0.81	5.85	0.16	13	+	-	-	+	-	+
chrY_DS485732v1_random	-104	396	501	*	2.28	2.46	2.08	0.39	0.743	0.895	2	1	1.39	7.9	7.26	0.97	5.68	6	-	+	+	-	+	-
chrX	17963105	17963605	501	*	2.33	2.11	2.52	-0.4	0.744	0.895	2	2	4.88	0.83	7.26	4.87	1.3	11	+	-	+	+	-	+	Sh
chr3L	3997780	3998280	501	*	7.29	7.4	7.17	0.23	0.744	0.895	2	3	246	66.92	193.6	248.54	38.32	145	+	+	-	+	+	+
chr3R	6915441	6915941	501	*	2.87	3.04	2.68	0.36	0.744	0.895	3	3	9.76	0.42	14.52	10.72	4.55	4	+	+	+	+	+	+	Antp
chrX	6937884	6938384	501	*	2.32	2.49	2.12	0.37	0.745	0.895	2	1	8.36	0.42	8.07	4.87	0.16	8	+	-	+	-	-	+	CG14431
chr3L	6985773	6986273	501	*	2.4	2.56	2.21	0.36	0.747	0.896	3	3	5.58	2.49	9.68	12.67	0.16	1	+	+	+	+	+	+	CG32388
chrX	20531754	20532254	501	*	3.26	3.06	3.44	-0.37	0.748	0.896	1	2	15.33	1.66	8.07	12.67	0.81	19	+	-	-	+	-	+
chrX	2147259	2147759	501	*	6.3	6.4	6.2	0.2	0.748	0.896	2	1	109.41	43.64	100.03	88.7	21.27	111	+	-	+	-	-	+	Pgd
chrX	12841781	12842281	501	*	7.37	7.48	7.26	0.22	0.748	0.896	3	3	214.64	81.47	240.39	234.9	36.37	188	+	+	+	+	+	+	Pde9
chrX	10771174	10771674	501	*	3.69	3.53	3.84	-0.3	0.749	0.897	3	3	16.03	4.16	14.52	16.57	3.25	23	+	+	+	+	+	+	BTBD9
chrX	3292666	3293166	501	*	2.85	2.65	3.02	-0.37	0.751	0.898	2	1	11.15	1.25	6.45	16.57	1.79	6	+	-	+	+	-	-	dnc
chr3L	10053915	10054415	501	*	3.14	3.31	2.96	0.35	0.757	0.904	1	1	13.94	0.42	15.33	0.97	1.3	21	+	-	-	-	-	+	dpr6
chrX	18310371	18310871	501	*	4.64	4.58	4.71	-0.13	0.757	0.904	2	1	18.82	22.86	29.85	18.52	40.76	19	-	+	+	-	+	-	upd1
chr2L	9717024	9717524	501	*	2.98	3.13	2.81	0.32	0.758	0.904	1	1	3.48	4.16	18.55	6.82	0.16	14	-	-	+	+	-	-	Nckx30C
chrX	5114724	5115224	501	*	2.95	3.1	2.78	0.32	0.76	0.905	2	2	5.58	0.83	19.36	12.67	0.97	7	+	-	+	+	-	+	CG15465
chrX	16928095	16928595	501	*	2.42	2.56	2.27	0.29	0.76	0.905	3	3	3.48	2.08	12.1	7.8	1.62	5	+	+	+	+	+	+	CG4928
chr2R	19725591	19726091	501	*	3.15	3.27	3	0.27	0.76	0.905	3	2	9.06	7.07	12.91	2.92	8.12	13	+	+	+	-	+	+	FBgn0011850
chr3R	21949265	21949765	501	*	3.03	3.17	2.87	0.29	0.761	0.905	1	2	13.24	0.83	12.91	11.7	1.3	9	+	-	-	+	-	+	Eip93F
chrX	3730589	3731089	501	*	2.81	2.92	2.7	0.22	0.762	0.906	1	2	5.58	7.48	9.68	4.87	2.6	12	+	-	-	+	-	+	Tlk
chrX	18814315	18814815	501	*	2.45	2.71	2.13	0.58	0.762	0.906	2	1	0.7	0.42	18.55	0.97	0.16	12	+	-	+	-	-	+	CG42450
chr2R	15582372	15582872	501	*	2.54	2.32	2.73	-0.41	0.763	0.907	1	2	8.36	4.99	1.61	16.57	1.3	2	+	-	-	-	+	+
chr2R	13716211	13716711	501	*	2.29	2.07	2.48	-0.41	0.764	0.907	1	1	2.79	4.99	4.84	0.97	1.79	14	+	-	-	-	-	+	CG17716
chrX	16116806	16117306	501	*	4.58	4.65	4.49	0.16	0.765	0.907	2	1	25.78	15.79	33.88	20.47	8.12	39	+	-	+	-	-	+
chrX	4355070	4355570	501	*	2.93	2.74	3.11	-0.37	0.766	0.908	1	1	13.94	0.42	5.65	10.72	1.14	14	+	-	-	+	-	-	norpA
chr3L	17860075	17860575	501	*	3.91	4.12	3.67	0.45	0.767	0.909	3	3	14.63	0.42	37.11	12.67	1.62	24	+	+	+	+	+	+	CG34002
chrX	10296221	10296721	501	*	4.42	4.29	4.53	-0.24	0.768	0.909	3	3	18.12	9.14	31.46	23.39	5.03	41	+	+	+	+	+	+	alpha-Man-Ia
chr3L	19904726	19905226	501	*	5.36	5.25	5.46	-0.21	0.768	0.909	2	3	40.42	13.3	60.5	66.28	11.04	55	+	-	+	+	+	+	Su(Tpl)
chr2L	10935230	10935730	501	*	3.89	4	3.78	0.22	0.769	0.909	3	3	20.21	6.65	20.97	19.49	1.62	20	+	+	+	+	+	+	CG14072
chr2L	15485522	15486022	501	*	4.26	4.37	4.15	0.22	0.77	0.91	1	1	18.82	26.19	16.94	17.54	27.6	8	-	+	-	-	+	-	Tim17b2
chr2R	10023752	10024252	501	*	3.98	4.09	3.86	0.24	0.772	0.911	2	2	25.09	25.35	0.81	6.82	12.67	24	+	+	-	-	+	+	Pka-R2
chr3R	8460061	8460561	501	*	3.25	3.39	3.1	0.29	0.773	0.911	3	3	18.12	0.42	12.91	11.7	0.97	13	+	+	+	+	+	+	CG45263
chrX	15019322	15019822	501	*	4.1	4.02	4.17	-0.15	0.775	0.911	1	1	15.33	5.82	27.43	14.62	27.44	12	-	-	+	-	+	-	hiw
chr2L	11793911	11794411	501	*	4.36	4.45	4.25	0.21	0.776	0.911	1	1	10.45	28.68	26.62	15.59	27.44	14	-	+	-	-	+	-	crol
chr3L	7772229	7772729	501	*	2.64	2.78	2.49	0.3	0.776	0.911	2	2	2.79	4.16	13.71	12.67	0.16	4	+	-	+	+	-	+	Clk
chrX	5168689	5169189	501	*	3.03	3.17	2.87	0.3	0.777	0.911	1	1	15.33	1.25	10.49	6.82	0.16	15	+	-	-	-	-	+	CG15465
chr2L	11249520	11250020	501	*	3.31	3.45	3.16	0.29	0.778	0.911	2	3	14.63	0.42	17.75	15.59	6.17	5	+	-	+	+	+	+	ab
chr2R	12088763	12089263	501	*	6.94	7.04	6.84	0.2	0.778	0.911	3	3	170.74	42.81	181.5	172.52	25.01	146	+	+	+	+	+	+	jeb
chrX	21433120	21433620	501	*	3.21	3.04	3.36	-0.32	0.778	0.911	3	3	4.88	0.42	19.36	6.82	2.92	21	+	+	+	+	+	+	DIP-beta
chrX	20444841	20445341	501	*	2.76	2.59	2.91	-0.32	0.778	0.911	3	2	4.18	5.82	8.07	6.82	2.76	13	+	+	+	+	-	+	CG1695
chrX	13844239	13844739	501	*	3.39	3.49	3.28	0.21	0.779	0.911	3	3	9.76	4.57	19.36	13.65	3.41	12	+	+	+	+	+	+	AMPdeam
chr2L	4725991	4726491	501	*	3.87	3.74	3.98	-0.24	0.779	0.911	1	1	6.97	29.1	4.03	8.77	21.6	17	-	+	-	-	+	-
chr3R	7029178	7029678	501	*	2.87	2.71	3.02	-0.3	0.779	0.911	3	3	3.48	2.49	13.71	3.9	3.41	17	+	+	+	+	+	+
chr2L	19326816	19327316	501	*	4.29	4.21	4.37	-0.16	0.78	0.911	1	1	22.3	22.03	11.29	14.62	25.49	22	-	+	-	-	+	-	FBgn0266796
chr2R	870164	870664	501	*	2.66	2.48	2.82	-0.34	0.781	0.912	3	3	9.06	0.42	7.26	8.77	1.46	11	+	+	+	+	+	+
chrX	6215322	6215822	501	*	2.46	2.58	2.33	0.25	0.783	0.913	3	3	2.79	6.23	8.87	4.87	0.16	10	+	+	+	+	+	+
chr2R	24619663	24620163	501	*	3.33	3.43	3.22	0.21	0.784	0.913	1	2	13.94	7.07	11.29	20.47	1.46	6	+	-	-	+	-	+	CG13594
chr3R	30762995	30763495	501	*	2.37	2.2	2.52	-0.32	0.784	0.913	2	0	2.09	0.42	11.29	6.82	2.44	8	+	-	+	-	-	-	zfh1
chr3L	24027149	24027649	501	*	2.58	2.44	2.71	-0.28	0.784	0.913	3	3	9.76	0.83	5.65	7.8	4.87	7	+	+	+	+	+	+	CG40045
chrX	17947040	17947540	501	*	3.88	3.97	3.78	0.19	0.785	0.913	3	3	17.42	6.23	23.39	17.54	2.6	21	+	+	+	+	+	+	Sh
chrX	3747907	3748407	501	*	2.84	2.95	2.71	0.24	0.787	0.914	1	2	9.06	2.08	12.1	11.7	2.92	5	+	-	-	+	+	-	Tlk
chr3R	25157142	25157642	501	*	3.68	3.45	3.88	-0.43	0.787	0.914	1	2	19.51	0.42	12.91	23.39	0.81	20	+	-	-	+	-	+
chr3R	16826167	16826667	501	*	5.36	5.3	5.42	-0.13	0.789	0.916	3	2	34.84	40.32	42.75	55.56	44.17	29	+	+	+	+	+	-	abd-A
chrX	12173801	12174301	501	*	2.49	2.29	2.66	-0.37	0.792	0.918	1	1	4.88	3.33	6.45	7.8	0.16	11	+	-	-	-	-	+	Ten-a
chr2R	14044078	14044578	501	*	3.28	3.14	3.41	-0.28	0.792	0.918	3	3	15.33	6.23	4.84	22.42	4.55	5	+	+	+	+	+	+	mam
chr3R	15177543	15178043	501	*	3.12	3.22	3.02	0.2	0.793	0.919	3	2	11.15	7.9	8.87	11.7	0.65	12	+	+	+	+	-	+	Mf
chrX	5257912	5258412	501	*	3.79	3.66	3.91	-0.25	0.794	0.92	2	2	16.03	4.16	17.75	23.39	3.57	18	+	-	+	+	-	+
chrY	3280166	3280666	501	*	3.94	4.03	3.84	0.19	0.797	0.921	2	2	13.24	5.82	29.85	16.57	3.41	23	+	-	+	+	-	+
chrX	5511112	5511612	501	*	3.38	3.25	3.51	-0.26	0.797	0.921	1	3	16.73	1.25	10.49	9.75	4.38	20	+	-	-	+	+	+
chr2L	4062812	4063312	501	*	2.9	3	2.78	0.22	0.797	0.921	3	3	4.18	3.74	16.13	10.72	1.95	8	+	+	+	+	+	+	ed
chr2R	14388468	14388968	501	*	3.48	3.57	3.39	0.18	0.799	0.923	1	3	13.94	8.73	12.91	23.39	1.95	6	+	-	-	+	+	+	CG10104
chrX	3327209	3327709	501	*	2.37	2.47	2.27	0.2	0.8	0.924	1	1	5.58	3.74	7.26	8.77	0.65	5	+	-	-	+	-	-	dnc
chrX	10014659	10015159	501	*	3.68	3.76	3.58	0.18	0.802	0.924	3	3	13.94	7.48	19.36	14.62	1.3	20	+	+	+	+	+	+	Cht6
chrX	20286174	20286674	501	*	2.41	2.23	2.57	-0.34	0.802	0.924	1	1	8.36	2.49	3.23	4.87	0.97	12	+	-	-	-	-	+
chr2L	12900414	12900914	501	*	2.7	2.79	2.6	0.18	0.803	0.924	2	0	5.58	6.23	8.87	7.8	3.41	7	+	-	+	-	-	-
chr2L	5550611	5551111	501	*	4.93	5	4.86	0.14	0.804	0.924	1	1	30.66	24.94	40.33	30.22	32.8	24	-	-	+	-	+	-	CG14014
chr2L	15828126	15828626	501	*	3.13	3.23	3.02	0.21	0.804	0.924	0	2	6.97	4.16	16.94	16.57	2.76	5	-	-	-	+	+	-
chr3R	2017146	2017646	501	*	2.73	2.81	2.63	0.18	0.807	0.928	3	3	10.45	4.16	6.45	6.82	1.79	10	+	+	+	+	+	+	Myo81F
chr2L	19587270	19587770	501	*	2.55	2.67	2.42	0.25	0.808	0.928	1	1	9.76	2.91	6.45	3.9	5.2	7	+	-	-	-	+	-	Lar
chrX	7209204	7209704	501	*	3.25	3.34	3.16	0.18	0.809	0.929	3	2	8.36	4.99	16.94	11.7	4.06	11	+	+	+	-	+	+	CG9650
chrX	19794121	19794621	501	*	2.64	2.48	2.78	-0.31	0.811	0.929	3	3	4.18	0.42	12.1	12.67	0.97	7	+	+	+	+	+	+
chrX	10133429	10133929	501	*	2.31	2.43	2.18	0.25	0.811	0.929	3	3	12.54	0.42	3.23	6.82	1.79	5	+	+	+	+	+	+	RhoU
chrX	15604690	15605190	501	*	2.52	2.38	2.65	-0.26	0.814	0.932	1	1	6.27	2.91	6.45	11.7	3.09	4	+	-	-	+	-	-	sog
chr2L	1648656	1649156	501	*	3.42	3.3	3.53	-0.23	0.814	0.932	3	3	13.24	5.82	10.49	20.47	4.22	10	+	+	+	+	+	+	chinmo
chr2R	21259474	21259974	501	*	2.45	2.53	2.37	0.16	0.816	0.933	3	3	4.18	6.65	6.45	6.82	0.65	8	+	+	+	+	+	+	Rgk3
chr2L	2788437	2788937	501	*	3.51	3.31	3.68	-0.37	0.816	0.933	1	1	18.12	0.42	11.29	14.62	0.81	23	+	-	-	+	-	-	Syt1
chr2R	22911828	22912328	501	*	3.49	3.38	3.59	-0.2	0.817	0.933	1	2	7.67	7.48	16.13	23.39	7.63	5	-	-	+	+	+	-	nahoda
chrX	16140932	16141432	501	*	2.38	2.47	2.29	0.17	0.818	0.933	1	1	5.58	3.74	7.26	3.9	1.79	9	+	-	-	-	-	+	disco-r
chr3L	10568662	10569162	501	*	2.49	2.32	2.64	-0.32	0.819	0.934	3	3	9.76	0.42	4.84	2.92	0.81	15	+	+	+	+	+	+	Rbfox1
chrX	8924726	8925226	501	*	5.19	5.11	5.27	-0.16	0.82	0.934	3	3	31.36	17.87	54.05	61.4	12.02	42	+	+	+	+	+	+	CG12661
chrX	22133162	22133662	501	*	4.43	4.5	4.36	0.14	0.821	0.935	2	2	18.82	8.73	40.33	22.42	5.03	34	+	-	+	+	-	+
chrX	23336850	23337350	501	*	3.48	3.4	3.56	-0.16	0.822	0.936	1	3	9.76	6.65	15.33	11.7	10.72	13	-	+	-	+	+	+
chr2L	18599016	18599516	501	*	4.25	4.19	4.3	-0.1	0.824	0.936	1	1	13.94	22.45	18.55	10.72	32.31	16	-	+	-	-	+	-	amos
chr3L	1923519	1924019	501	*	3.52	3.59	3.44	0.15	0.824	0.936	1	1	17.42	5.82	12.91	19.49	3.09	10	+	-	-	+	-	-	FBgn0052312
chr3R	29749407	29749907	501	*	4.41	4.32	4.5	-0.18	0.825	0.936	3	3	25.09	12.89	21.78	43.86	7.79	16	+	+	+	+	+	+	ATPsyngamma
chr3L	20697154	20697654	501	*	4.77	4.72	4.83	-0.12	0.826	0.936	1	2	22.3	29.93	26.62	40.94	32.48	12	-	+	-	+	+	-	kni
chr2L	4647444	4647944	501	*	2.93	2.79	3.06	-0.27	0.826	0.936	3	3	9.06	0.42	11.29	8.77	1.3	15	+	+	+	+	+	+	CG43798
chrX	11020629	11021129	501	*	4.79	4.65	4.91	-0.26	0.827	0.936	2	3	18.12	4.16	53.24	46.78	6.33	37	+	-	+	+	+	+	CG42339
chrX	5631910	5632410	501	*	3.29	3.16	3.41	-0.24	0.827	0.936	1	1	2.09	6.23	18.55	16.57	2.27	13	-	-	+	+	-	-	OtopLa
chrX	10581314	10581814	501	*	2.92	3.01	2.82	0.19	0.828	0.936	2	2	11.15	3.33	9.68	11.7	4.55	5	+	-	+	+	+	-	spri
chrX	1606292	1606792	501	*	3.46	3.34	3.56	-0.22	0.828	0.936	2	1	10.45	7.9	12.1	25.34	5.03	5	+	-	+	+	-	-	Mur2B
chrX	12160619	12161119	501	*	3.57	3.67	3.46	0.2	0.829	0.936	3	3	16.73	0.42	20.97	12.67	2.44	18	+	+	+	+	+	+	Ten-a
chrX	21292363	21292863	501	*	2.7	2.78	2.6	0.18	0.83	0.936	1	2	10.45	2.91	7.26	9.75	0.49	8	+	-	-	+	-	+	CG1494
chrX	3452064	3452564	501	*	5.74	5.66	5.81	-0.16	0.83	0.936	3	3	67.6	18.29	65.34	87.72	12.99	68	+	+	+	+	+	+	FBgn0266350
chrX	13381365	13381865	501	*	4.66	4.71	4.6	0.12	0.83	0.936	3	3	28.57	14.55	35.49	45.81	8.77	18	+	+	+	+	+	+	Rbp1-like
chrX	13784106	13784606	501	*	3.48	3.56	3.38	0.18	0.83	0.936	1	1	13.94	2.91	18.55	21.44	3.9	6	+	-	-	+	-	-	CtsB1
chr2R	16512303	16512803	501	*	5.32	5.38	5.27	0.11	0.832	0.937	3	3	57.14	24.94	42.75	56.53	10.07	49	+	+	+	+	+	+	Sema2a
chr3R	13673436	13673936	501	*	2.36	2.21	2.5	-0.29	0.832	0.937	2	3	4.88	3.33	5.65	6.82	1.14	9	+	-	+	+	+	+	Task6
chrX	2820225	2820725	501	*	3.6	3.47	3.71	-0.24	0.834	0.937	1	2	7.67	6.23	19.36	11.7	0.65	27	+	-	-	+	-	+	kirre
chr2R	9231437	9231937	501	*	3.16	3.08	3.23	-0.15	0.834	0.937	2	1	5.58	2.91	16.94	6.82	10.39	11	+	-	+	-	+	-	hig
chr2L	21121953	21122453	501	*	2.81	2.9	2.72	0.19	0.835	0.938	2	2	4.88	7.9	9.68	16.57	0.16	3	+	-	+	+	-	+	Nhe2
chr2R	14452474	14452974	501	*	2.43	2.53	2.32	0.21	0.836	0.938	1	1	2.79	1.66	12.91	6.82	0.16	8	+	-	-	-	-	+	Oaz
chr2R	22646017	22646517	501	*	3.8	3.86	3.73	0.13	0.837	0.939	1	1	22.3	14.13	7.26	7.8	11.04	21	+	-	-	-	+	-	CG2852
chrX	12482856	12483356	501	*	3.99	4.05	3.92	0.13	0.839	0.94	3	3	16.03	7.9	25.81	26.32	3.09	16	+	+	+	+	+	+
chrX	13871360	13871860	501	*	3.56	3.46	3.65	-0.19	0.844	0.945	2	3	14.63	6.23	12.1	17.54	5.03	15	+	-	+	+	+	+	mamo
chr3R	8413830	8414330	501	*	3.95	4.02	3.88	0.14	0.847	0.948	2	3	13.24	7.07	28.23	26.32	1.79	16	+	-	+	+	+	+	CG45263
chr2R	11637123	11637623	501	*	3.28	3.18	3.38	-0.2	0.849	0.949	1	1	13.24	4.99	8.87	14.62	3.57	13	+	-	-	+	-	-	CG9005
chrX	2677325	2677825	501	*	2.64	2.54	2.73	-0.19	0.849	0.949	1	3	10.45	2.91	4.03	4.87	5.03	10	+	-	-	+	+	+	sgg
chr2L	6186418	6186918	501	*	3.98	4.04	3.92	0.12	0.85	0.949	3	3	16.73	7.48	25.01	25.34	5.03	15	+	+	+	+	+	+	smal
chr3R	14037313	14037813	501	*	3.68	3.76	3.59	0.17	0.85	0.949	2	3	6.27	2.08	32.27	17.54	6.5	12	+	-	+	+	+	+	CG9922
chr3R	23228278	23228778	501	*	2.84	2.71	2.95	-0.25	0.852	0.95	3	3	9.76	4.99	4.84	7.8	1.46	14	+	+	+	+	+	+	CG4467
chr3L	16288270	16288770	501	*	3.04	3.1	2.97	0.13	0.852	0.95	1	2	11.85	5.82	8.07	8.77	0.81	14	+	-	-	+	-	+	CG13047
chrX	11255684	11256184	501	*	3.09	2.96	3.21	-0.24	0.854	0.951	1	2	11.85	9.14	2.42	15.59	2.11	10	+	-	-	+	-	+	CG44422
chr3L	17303821	17304321	501	*	3.23	3.3	3.16	0.14	0.856	0.952	2	3	8.36	4.16	16.94	12.67	1.14	13	+	-	+	+	+	+
chr2R	9520632	9521132	501	*	4.28	4.2	4.36	-0.17	0.856	0.952	2	3	18.82	9.56	26.62	31.19	3.57	27	+	-	+	+	+	+	brp
chrX	4700206	4700706	501	*	2.59	2.65	2.52	0.14	0.857	0.952	2	1	6.27	2.91	9.68	4.87	1.3	11	+	-	+	-	-	+	ctp
chr3L	11007788	11008288	501	*	3.09	3.16	3.01	0.15	0.857	0.952	2	1	9.76	3.33	13.71	10.72	0.49	13	+	-	+	-	-	+	klu
chr2R	23113006	23113506	501	*	3.6	3.66	3.54	0.12	0.859	0.953	2	3	16.73	4.99	16.13	14.62	2.27	18	+	-	+	+	+	+	FBgn0266008
chr2L	11536076	11536576	501	*	2.6	2.69	2.5	0.19	0.859	0.953	1	1	7.67	0.42	11.29	0.97	0.97	15	+	-	-	-	-	+	FBgn0261707
chr3L	18852079	18852579	501	*	3.15	3.21	3.09	0.12	0.86	0.953	1	3	11.15	4.57	12.1	10.72	3.9	11	+	-	-	+	+	+	FBgn0266936
chr3R	11014200	11014700	501	*	3.08	2.97	3.18	-0.21	0.861	0.954	3	3	9.76	2.49	11.29	16.57	1.62	9	+	+	+	+	+	+	side-VI
chr2L	19145017	19145517	501	*	2.71	2.58	2.83	-0.25	0.862	0.955	3	3	6.97	3.74	7.26	19.49	0.81	1	+	+	+	+	+	+	brat
chr2R	11005497	11005997	501	*	2.6	2.67	2.52	0.15	0.864	0.956	2	3	2.09	2.49	14.52	4.87	1.3	11	+	-	+	+	+	+	luna
chr2L	20509753	20510253	501	*	5.36	5.29	5.42	-0.13	0.865	0.956	3	2	48.09	19.54	50.01	74.08	8.77	46	+	+	+	+	-	+
chr3L	6541294	6541794	501	*	3.28	3.16	3.38	-0.21	0.865	0.956	2	2	9.06	3.33	14.52	11.7	0.49	19	+	-	+	+	-	+	sfl
chr3R	18362873	18363373	501	*	6.19	6.13	6.25	-0.12	0.866	0.956	3	3	75.26	43.23	91.16	84.8	18.02	125	+	+	+	+	+	+	CG15803
chr3R	2005988	2006912	925	*	2.56	2.45	2.66	-0.21	0.868	0.956	2	2	4.18	3.33	8.87	3.9	2.11	13	+	-	+	+	-	+	Myo81F
chr2R	15640636	15641136	501	*	4.97	4.88	5.05	-0.18	0.868	0.956	1	2	49.48	10.39	28.23	46.78	5.68	47	+	-	-	+	-	+	CG42524
chr3R	19156597	19157097	501	*	4.11	4.05	4.17	-0.12	0.869	0.956	1	1	2.79	18.7	28.23	24.37	19.65	10	-	-	+	-	+	-	nos
chrX	5063325	5063825	501	*	2.61	2.68	2.55	0.13	0.869	0.956	1	3	11.85	2.49	4.84	8.77	2.76	6	+	-	-	+	+	+	ovo
chr3R	30616200	30616700	501	*	4.32	4.37	4.27	0.1	0.869	0.956	1	1	14.63	18.29	29.04	11.7	17.21	29	-	+	-	-	+	-
chrX	17819628	17820128	501	*	3.9	3.86	3.95	-0.09	0.87	0.956	1	1	11.85	19.54	12.1	11.7	21.6	13	-	+	-	-	+	-	CG12986
chrX	4350206	4350706	501	*	2.32	2.38	2.26	0.13	0.871	0.957	1	2	9.06	4.16	2.42	12.67	0.65	1	+	-	-	+	-	+	norpA
chr2R	16833702	16834202	501	*	2.88	2.77	2.97	-0.2	0.871	0.957	3	3	6.27	2.91	11.29	0.97	2.6	20	+	+	+	+	+	+	FBgn0263659
chr3L	11254383	11254883	501	*	3.42	3.5	3.35	0.15	0.872	0.957	3	3	20.21	12.89	0.81	12.67	11.85	6	+	+	+	+	+	+	scyl
chr2R	10460380	10460880	501	*	2.57	2.64	2.5	0.15	0.873	0.957	3	3	6.97	2.08	9.68	0.97	1.95	14	+	+	+	+	+	+	Galphao
chrX	6652412	6653330	919	*	2.62	2.69	2.53	0.16	0.875	0.959	1	1	10.45	2.49	6.45	0.97	4.38	12	+	-	-	-	-	+	Cdc7
chr3L	18787759	18788259	501	*	2.68	2.75	2.6	0.15	0.876	0.959	3	3	7.67	0.42	12.1	4.87	1.3	12	+	+	+	+	+	+	ftz-f1
chr3L	18439763	18440263	501	*	4.55	4.51	4.59	-0.07	0.878	0.959	2	3	18.12	14.96	35.49	17.54	24.52	30	+	-	+	+	+	+	skl
chrX	18171519	18172019	501	*	3.86	3.91	3.81	0.1	0.878	0.959	2	3	21.6	5.82	17.75	8.77	3.41	30	+	-	+	+	+	+	Frq1
chrX_DS485044v1_random	-233	557	791	*	3.41	3.46	3.37	0.09	0.878	0.959	1	2	9.76	7.07	16.13	16.57	2.44	12	+	-	-	+	-	+
chrX	10059682	10060182	501	*	3.34	3.25	3.43	-0.19	0.878	0.959	1	1	10.45	9.14	8.87	20.47	2.92	9	+	-	-	+	-	-	CG15312
chrX	1641592	1642092	501	*	2.3	2.37	2.22	0.15	0.879	0.959	1	3	11.85	0.42	3.23	7.8	0.16	6	+	-	-	+	+	+	Mur2B
chrX	7222523	7223023	501	*	2.85	2.91	2.78	0.14	0.882	0.961	1	2	11.15	5.82	5.65	2.92	6.66	11	+	-	-	-	+	+	CG9650
chr3L	18013048	18013548	501	*	2.91	3	2.81	0.19	0.882	0.961	1	2	9.06	1.25	13.71	9.75	8.28	3	+	-	-	+	+	-	Eip75B
chrX	10441867	10442367	501	*	3.81	3.85	3.76	0.09	0.883	0.961	2	3	20.21	4.57	18.55	17.54	3.09	20	+	-	+	+	+	+	CG32683
chr2R	10830621	10831121	501	*	4.06	4.1	4.02	0.08	0.883	0.961	3	3	23	12.47	16.13	24.37	1.3	23	+	+	+	+	+	+	CG12344
chr2L	23239241	23239741	501	*	4.28	4.21	4.34	-0.13	0.884	0.961	2	1	25.78	8.73	20.97	35.09	6.66	19	+	-	+	-	+	-	FBgn0267986
chrX	20864540	20865040	501	*	3.81	3.85	3.78	0.07	0.884	0.961	1	1	11.85	10.39	20.97	18.52	3.57	19	+	-	-	-	-	+	shakB
chr2L	12893019	12893519	501	*	2.36	2.25	2.45	-0.2	0.885	0.961	1	2	4.18	0.42	9.68	0.97	1.46	14	+	-	-	+	-	+
chr3R	5624755	5625255	501	*	5.1	5.14	5.07	0.08	0.885	0.961	3	2	42.51	30.34	33.07	30.22	36.21	34	+	+	+	+	+	-	CG2911
chr3L	8666461	8666961	501	*	4.76	4.72	4.81	-0.09	0.886	0.961	1	1	16.03	24.11	38.72	12.67	24.19	47	+	-	-	-	+	-
chrX	11703006	11703506	501	*	3.28	3.33	3.21	0.12	0.887	0.962	2	3	13.24	2.49	14.52	6.82	6.01	15	+	-	+	+	+	+	PhKgamma
chrX	15403583	15404083	501	*	3.21	3.14	3.28	-0.14	0.891	0.964	2	0	9.06	0.42	16.94	13.65	4.55	11	+	-	+	-	-	-	Cngl
chr3R	9537613	9538113	501	*	2.69	2.75	2.63	0.11	0.891	0.964	2	2	3.48	4.57	12.1	0.97	0.65	17	+	-	+	+	-	+	mura
chrX	12039204	12039704	501	*	2.57	2.46	2.67	-0.22	0.891	0.964	3	3	5.58	0.42	10.49	0.97	0.16	18	+	+	+	+	+	+
chrX	4081420	4081920	501	*	4.64	4.7	4.57	0.14	0.892	0.964	2	3	32.06	5.82	40.33	44.84	4.22	22	+	-	+	+	+	+	CG43689
chrUn_DS484276v1	1267	1767	501	*	3.83	3.87	3.79	0.08	0.893	0.965	2	3	15.33	5.82	22.59	15.59	2.76	23	+	+	-	+	+	+
chr3R	7994049	7994549	501	*	2.65	2.7	2.6	0.1	0.895	0.966	1	2	6.97	2.91	9.68	1.95	2.27	14	+	-	-	+	-	+	ELOVL
chr2R	16390704	16391204	501	*	3.49	3.53	3.44	0.09	0.896	0.967	3	1	9.06	4.57	20.97	11.7	2.92	18	+	+	+	-	-	+	Sema2b
chr2R	12914445	12914945	501	*	2.61	2.66	2.55	0.11	0.899	0.97	2	3	2.79	3.33	12.91	0.97	0.65	16	+	+	-	+	+	+	NAT1
chrX	10171589	10172089	501	*	4.78	4.73	4.83	-0.1	0.9	0.97	1	1	40.42	9.98	29.04	38.99	10.23	36	+	-	-	+	-	-	CG43902
chr3R	22951760	22952260	501	*	2.56	2.6	2.51	0.1	0.901	0.97	2	0	7.67	2.49	8.07	3.9	0.16	13	+	-	+	-	-	-	klg
chr3L	17500525	17501025	501	*	5.1	5.04	5.15	-0.11	0.901	0.97	3	3	41.12	15.79	41.95	49.71	6.66	50	+	+	+	+	+	+	Oatp74D
chrX	5299819	5300319	501	*	4.86	4.92	4.8	0.12	0.902	0.971	3	3	39.72	10.81	40.33	54.58	4.22	25	+	+	+	+	+	+	CG42749
chrX	1942073	1942573	501	*	2.28	2.19	2.36	-0.17	0.903	0.971	1	1	7.67	0.42	5.65	6.82	1.62	7	+	-	-	+	-	-	CG3857
chr3R	17489322	17489822	501	*	3.69	3.62	3.75	-0.14	0.904	0.971	3	3	20.21	0.42	16.13	16.57	2.92	21	+	+	+	+	+	+	Dscam3
chr3L	4696267	4696767	501	*	5.61	5.59	5.63	-0.04	0.904	0.971	3	3	41.12	40.32	62.92	34.11	63.49	51	+	+	+	+	+	+	CG15876
chrX	9824797	9825297	501	*	2.28	2.33	2.22	0.11	0.907	0.973	2	3	9.06	0.42	5.65	10.72	1.3	2	+	-	+	+	+	+	CARPB
chr2L	11455333	11455833	501	*	4.73	4.71	4.75	-0.04	0.907	0.973	1	1	18.82	27.43	32.27	27.29	33.45	20	-	+	-	-	+	-
chr3R	6416516	6417016	501	*	4.23	4.17	4.29	-0.11	0.908	0.973	3	3	19.51	11.22	23.39	24.37	6.17	28	+	+	+	+	+	+	gpp
chrX	592657	593157	501	*	5.08	5.06	5.1	-0.04	0.909	0.973	2	2	35.54	29.1	35.49	38.01	37.18	28	-	+	+	+	+	-	CG13366
chr3R	18954252	18954752	501	*	2.37	2.41	2.33	0.08	0.909	0.973	1	1	11.85	1.66	2.42	4.87	0.16	10	+	-	-	-	-	+	CG42613
chr3L	16829873	16830373	501	*	2.7	2.74	2.66	0.09	0.911	0.974	2	0	6.27	2.49	11.29	9.75	0.16	9	+	-	+	-	-	-	CG13024
chrX	9542170	9542670	501	*	2.55	2.59	2.5	0.08	0.911	0.974	3	3	6.27	2.08	9.68	9.75	2.27	5	+	+	+	+	+	+	CG32700
chr2R	15131621	15132121	501	*	4.44	4.47	4.42	0.05	0.912	0.974	1	1	18.12	12.05	36.3	29.24	10.88	24	+	-	-	-	+	-	chn
chr3R	29456397	29456897	501	*	4.61	4.54	4.67	-0.13	0.913	0.975	0	2	5.58	3.74	60.5	14.62	15.91	46	-	-	-	-	+	+	Ptp99A
chr2L	9929046	9929546	501	*	3.36	3.29	3.43	-0.14	0.914	0.975	1	2	11.85	3.74	13.71	16.57	0.81	15	+	-	-	+	-	+	CG42366
chrX	10257352	10257852	501	*	3.78	3.82	3.74	0.07	0.914	0.975	2	3	16.73	3.74	21.78	18.52	6.66	15	+	-	+	+	+	+	Hk
chr2L	2293105	2293605	501	*	2.72	2.63	2.81	-0.18	0.916	0.975	1	1	8.36	5.4	4.84	10.72	1.3	9	+	-	-	+	-	-	robl22E
chrX	12808918	12809418	501	*	2.72	2.74	2.7	0.05	0.918	0.976	1	1	11.85	5.82	2.42	13.65	0.81	5	+	-	-	+	-	-	Pde9
chrX	13564934	13565434	501	*	2.66	2.71	2.61	0.1	0.918	0.976	2	0	9.06	0.83	9.68	4.87	3.41	10	+	-	+	-	-	-	Tpst
chr3L	8670901	8671401	501	*	5.66	5.69	5.63	0.06	0.919	0.976	3	2	42.51	47.8	64.53	49.71	62.35	36	+	+	+	-	+	+
chr3L	17269884	17270384	501	*	2.86	2.9	2.81	0.09	0.92	0.976	1	2	6.27	0.83	15.33	8.77	0.32	12	+	-	-	+	-	+
chr3L	9784154	9784654	501	*	4.28	4.25	4.32	-0.07	0.92	0.976	1	1	23.69	18.7	14.52	22.42	17.37	20	+	-	-	-	+	-	CG8177
chrX	3734724	3735224	501	*	3.45	3.47	3.42	0.05	0.92	0.976	1	1	13.24	6.23	13.71	17.54	1.62	13	+	-	-	+	-	-	Tlk
chr3L	20594334	20594834	501	*	5.21	5.23	5.18	0.05	0.921	0.976	3	3	45.99	16.63	50.01	46.78	8.28	54	+	+	+	+	+	+
chr3R	31149923	31150423	501	*	3.58	3.6	3.55	0.05	0.921	0.976	2	3	12.54	5.4	18.55	15.59	1.62	18	+	-	+	+	+	+	Gycbeta100B
chrX	3004836	3005336	501	*	2.41	2.32	2.49	-0.17	0.922	0.976	3	3	4.88	2.08	8.07	10.72	0.16	6	+	+	+	+	+	+	kirre
chr3R	31667735	31668235	501	*	2.42	2.43	2.41	0.02	0.924	0.976	1	1	8.36	5.4	2.42	7.8	2.11	6	+	-	-	-	-	+	CG1815
chrY_DS484589v1_random	1042	1542	501	*	4.74	4.72	4.76	-0.04	0.924	0.976	1	2	12.54	39.07	27.43	13.65	37.83	30	-	+	-	-	+	+
chrX	13854807	13855307	501	*	3.07	3.11	3.03	0.08	0.925	0.976	1	1	10.45	3.33	12.1	20.47	3.09	1	+	-	-	+	-	-	mamo
chrX	18503207	18503707	501	*	5.55	5.57	5.52	0.06	0.926	0.976	3	3	55.05	13.72	74.21	84.8	12.83	40	+	+	+	+	+	+	Wnt5
chrX	7030055	7030555	501	*	2.59	2.62	2.57	0.05	0.927	0.976	1	1	6.27	2.49	9.68	5.85	1.95	10	+	-	-	-	-	+	CG12541
chr3R	21002170	21002670	501	*	3.16	3.09	3.22	-0.13	0.927	0.976	2	0	10.45	5.4	9.68	10.72	2.27	15	+	-	+	-	-	-	Calx
chr3R	10557310	10557810	501	*	6.35	6.31	6.39	-0.07	0.927	0.976	3	3	94.78	42.4	101.64	136.46	17.37	97	+	+	+	+	+	+	hth
chr2R	6828037	6828537	501	*	3.49	3.53	3.45	0.08	0.927	0.976	1	2	9.76	7.9	16.94	8.77	10.07	14	+	-	-	+	+	-	CG15236
chr3R	14703502	14704002	501	*	2.4	2.45	2.36	0.08	0.928	0.976	2	3	9.06	0.83	6.45	0.97	2.44	12	+	-	+	+	+	+	kibra
chrX	12905212	12905712	501	*	3.06	3.1	3.01	0.09	0.928	0.976	2	2	11.15	0.83	13.71	13.65	4.55	6	+	-	+	+	+	-	CG4407
chr3R	8228497	8228997	501	*	5.71	5.65	5.76	-0.1	0.929	0.976	1	2	87.11	17.87	45.98	98.44	6.66	57	+	-	-	+	-	+	FBgn0267110
chrX	20017626	20018126	501	*	2.54	2.47	2.6	-0.13	0.93	0.976	3	3	2.09	0.83	13.71	5.85	1.3	11	+	+	+	+	+	+	Dop2R
chrX	1726867	1727367	501	*	4	4.05	3.94	0.11	0.931	0.976	2	2	12.54	0.83	36.3	15.59	3.41	27	+	-	+	+	-	+
chr3R	22876854	22877354	501	*	2.48	2.41	2.55	-0.15	0.932	0.976	1	2	9.06	0.42	6.45	0.97	0.65	16	+	-	-	+	-	+
chrX	4896836	4897336	501	*	3.31	3.25	3.36	-0.12	0.932	0.976	2	3	14.63	4.99	8.87	14.62	3.25	13	+	-	+	+	+	+	CG42594
chrX	9353076	9353576	501	*	3.49	3.49	3.48	0.02	0.932	0.976	2	1	12.54	9.98	11.29	11.7	2.76	19	+	+	-	-	-	+	CG34449
chrX	23216877	23217377	501	*	2.94	2.89	3	-0.11	0.933	0.976	3	3	4.18	8.31	9.68	0.97	5.03	18	+	+	+	+	+	+	FBgn0267519
chrX	13959427	13959927	501	*	3.62	3.55	3.68	-0.14	0.933	0.976	1	1	9.06	4.99	20.97	24.37	0.16	14	+	-	-	-	-	+	mamo
chrX	18698272	18698772	501	*	2.28	2.31	2.26	0.05	0.934	0.976	1	1	11.15	2.08	1.61	10.72	1.62	2	+	-	-	+	-	-
chr3L	18588466	18588966	501	*	4.17	4.15	4.19	-0.04	0.934	0.976	1	1	20.21	26.6	6.45	18.52	31.18	5	-	+	-	-	+	-	CG7271
chrX	9326071	9326571	501	*	3.93	3.99	3.88	0.11	0.935	0.976	2	3	28.57	0.42	18.55	27.29	2.76	14	+	-	+	+	+	+	CG34449
chrX	3300339	3300839	501	*	2.74	2.67	2.8	-0.13	0.935	0.976	2	0	2.09	3.33	13.71	8.77	1.14	11	+	-	+	-	-	-	dnc
chrX	1646947	1647447	501	*	4.07	4.02	4.11	-0.09	0.935	0.976	3	3	23	7.07	18.55	19.49	4.38	28	+	+	+	+	+	+	Mur2B
chrX	14384264	14385144	881	*	3.24	3.18	3.3	-0.12	0.936	0.976	2	3	13.94	0.42	12.91	10.72	0.81	18	+	-	+	+	+	+	dpr8
chr3R	13594639	13595139	501	*	2.32	2.33	2.3	0.03	0.937	0.976	1	1	4.18	2.08	8.87	6.82	0.97	7	+	-	-	+	-	-	CG14369
chr3L	21490421	21490921	501	*	4.25	4.29	4.2	0.09	0.937	0.976	1	1	12.54	20.37	25.81	6.82	29.23	19	-	+	-	-	+	-	Neu2
chr3R	25168563	25169063	501	*	4.49	4.44	4.53	-0.09	0.939	0.977	3	3	31.36	13.72	20.17	41.91	5.36	22	+	+	+	+	+	+
chr2L	7110686	7111186	501	*	3.19	3.22	3.16	0.06	0.94	0.977	2	1	7.67	3.33	16.94	1.95	3.9	21	+	-	+	-	-	+	Pvf3
chr2L	13229473	13229973	501	*	5.92	5.95	5.9	0.05	0.941	0.978	2	3	32.06	64.43	88.74	46.78	76.15	56	-	+	+	+	+	+	CG16815
chrX	4849576	4850076	501	*	2.72	2.74	2.69	0.05	0.941	0.978	1	1	13.24	0.42	6.45	8.77	0.65	10	+	-	-	-	-	+	CG42594
chr2L	12538472	12538972	501	*	2.32	2.27	2.38	-0.11	0.943	0.979	3	1	0.7	0.83	12.91	13.65	0.97	1	+	+	+	+	-	-	bun
chrX	3452988	3453488	501	*	5.33	5.36	5.3	0.06	0.944	0.979	2	2	34.15	72.74	16.13	11.7	19.49	87	+	+	-	-	+	+	FBgn0266350
chr3R	19796749	19797249	501	*	4.96	4.97	4.95	0.02	0.944	0.979	3	3	39.72	19.54	34.69	54.58	7.14	31	+	+	+	+	+	+	bnl
chrX	18035654	18036154	501	*	4.33	4.34	4.32	0.02	0.946	0.979	3	3	23	11.22	26.62	34.11	2.92	23	+	+	+	+	+	+	Sh
chrX	16633552	16634052	501	*	4	3.95	4.05	-0.1	0.946	0.979	2	2	15.33	27.02	4.03	11.7	8.12	30	+	+	-	-	+	+	Rok
chr2R	12100997	12101497	501	*	2.39	2.31	2.47	-0.16	0.946	0.979	3	3	4.18	5.82	4.84	7.8	0.81	8	+	+	+	+	+	+	jeb
chr3L	3963986	3964486	501	*	3.03	3.05	3	0.06	0.947	0.979	3	3	13.94	2.08	8.87	2.92	5.03	16	+	+	+	+	+	+	CG12605
chr3R	24699220	24699720	501	*	3.71	3.67	3.75	-0.08	0.948	0.979	3	3	11.85	2.08	24.2	12.67	3.57	24	+	+	+	+	+	+	slo
chr3L	19692282	19692782	501	*	3.37	3.38	3.37	0.01	0.951	0.982	1	1	20.21	5.4	5.65	19.49	1.46	10	+	-	-	+	-	-	verm
chrX	12648162	12648662	501	*	3.54	3.5	3.58	-0.07	0.952	0.982	2	3	20.21	2.49	11.29	9.75	5.03	21	+	-	+	+	+	+	Tomosyn
chrX	15352621	15353121	501	*	3.06	3.02	3.1	-0.09	0.953	0.982	1	1	12.54	0.42	11.29	5.85	1.95	18	+	-	-	-	+	-	acj6
chr2L	23048587	23049087	501	*	2.89	2.88	2.89	-0.01	0.953	0.982	1	1	2.09	7.07	12.91	3.9	10.39	8	-	-	+	-	+	-
chrUn_DS485995v1	-23	477	501	*	5.23	5.19	5.28	-0.09	0.954	0.982	3	3	44.6	0.42	64.53	38.01	15.26	63	+	+	+	+	+	+
chrX	22606291	22606791	501	*	2.94	2.88	3	-0.11	0.954	0.982	2	1	13.94	4.16	4.03	6.82	1.14	16	+	+	-	+	-	-	Cda4
chrX	18301648	18302148	501	*	2.89	2.9	2.88	0.02	0.955	0.983	2	1	7.67	5.82	8.87	11.7	4.38	6	+	-	+	-	-	+
chr3R	10352815	10353315	501	*	4.29	4.32	4.25	0.07	0.956	0.983	1	1	6.27	19.12	34.69	6.82	29.23	21	-	-	+	-	+	-	jumu
chr3L	21389527	21390027	501	*	3.27	3.27	3.26	0.02	0.958	0.985	2	1	9.06	6.23	13.71	17.54	0.16	11	+	+	-	-	-	+	rgn
chrX	576786	577286	501	*	3.67	3.67	3.67	0	0.96	0.985	3	3	14.63	6.65	16.94	11.7	3.41	23	+	+	+	+	+	+	Appl
chr2R	12834458	12834958	501	*	2.28	2.23	2.34	-0.11	0.96	0.985	1	1	5.58	0.42	8.07	0.97	0.16	14	+	-	-	-	-	+
chrX	15949772	15950272	501	*	2.42	2.42	2.42	0	0.961	0.985	2	3	6.27	2.49	7.26	9.75	1.3	5	+	-	+	+	+	+	mmd
chrX	14102040	14102540	501	*	2.37	2.36	2.39	-0.03	0.963	0.986	1	2	5.58	4.16	5.65	4.87	0.81	10	+	-	-	+	-	+	FBgn0011977
chrX	10127344	10127844	501	*	4.14	4.1	4.17	-0.07	0.963	0.986	3	3	17.42	7.48	26.62	18.52	3.41	32	+	+	+	+	+	+	RhoU
chr3R	28397176	28397676	501	*	3.78	3.79	3.78	0.01	0.963	0.986	3	3	13.94	5.82	21.78	20.47	5.68	15	+	+	+	+	+	+
chr2L	2785171	2785671	501	*	5.43	5.41	5.46	-0.05	0.965	0.987	2	3	34.84	12.47	79.86	67.25	8.44	56	+	-	+	+	+	+	Syt1
chrX	11833627	11834127	501	*	4.39	4.37	4.42	-0.05	0.966	0.988	3	3	33.45	5.82	22.59	25.34	6.82	32	+	+	+	+	+	+	rudhira
chr2R	8180317	8180817	501	*	3.89	3.89	3.89	0	0.968	0.988	1	1	18.12	5.4	20.97	21.44	1.95	21	+	-	-	-	-	+	LRP1
chr2L	14893215	14893715	501	*	3.49	3.49	3.5	-0.01	0.968	0.988	1	2	13.24	7.48	12.91	10.72	1.14	22	+	-	-	+	-	+
chr3R	4797517	4798017	501	*	2.58	2.6	2.57	0.04	0.968	0.988	1	2	4.88	0.42	12.91	13.65	2.11	2	+	-	-	+	-	+	ctrip
chr2L	18598068	18598568	501	*	5.11	5.11	5.12	-0.01	0.969	0.989	2	2	32.06	30.34	41.14	42.89	38.16	23	+	+	-	-	+	+	amos
chrX	12695809	12696309	501	*	3.08	3.1	3.06	0.04	0.971	0.989	1	1	8.36	0.42	16.94	11.7	4.38	9	+	-	-	-	-	+	Smr
chrX	10737123	10737623	501	*	3.43	3.4	3.47	-0.08	0.972	0.989	1	3	16.03	7.48	8.07	10.72	3.57	19	+	-	-	+	+	+	stx
chr2L	18866430	18866930	501	*	3.04	3.01	3.06	-0.05	0.974	0.989	3	3	8.36	4.57	11.29	6.82	5.2	13	+	+	+	+	+	+	tup
chr2L	18596840	18597340	501	*	5.55	5.56	5.53	0.03	0.974	0.989	3	2	44.6	35.75	61.31	46.78	55.69	36	+	+	+	+	+	-	amos
chr2R	5192034	5192534	501	*	2.38	2.36	2.4	-0.04	0.974	0.989	2	0	3.48	7.07	4.84	13.65	0.16	2	+	-	+	-	-	-	Nipped-A
chr3L	17701000	17701500	501	*	2.61	2.57	2.66	-0.09	0.975	0.989	2	3	12.54	1.25	4.03	9.75	0.16	9	+	+	-	+	+	+	Ccn
chrX	21513385	21513885	501	*	2.97	2.97	2.97	0	0.975	0.989	1	1	12.54	1.25	9.68	5.85	0.65	17	+	-	-	+	-	-	FBgn0266457
chr3R	22309031	22309531	501	*	3.27	3.23	3.31	-0.08	0.975	0.989	3	3	9.76	7.07	11.29	18.52	0.16	11	+	+	+	+	+	+	CG34377
chr2R	20510984	20511484	501	*	2.5	2.49	2.5	-0.01	0.977	0.991	2	3	8.36	1.25	7.26	11.7	0.32	5	+	-	+	+	+	+	FBgn0265859
chrX	5935345	5935845	501	*	3.05	3.05	3.05	0	0.978	0.991	1	1	13.94	0.42	10.49	6.82	0.97	17	+	-	-	+	-	-	CG3726
chr2R	10002403	10002903	501	*	2.68	2.67	2.68	-0.02	0.978	0.991	3	3	2.79	4.99	11.29	0.97	1.3	17	+	+	+	+	+	+	Pka-R2
chr2R	24556863	24557363	501	*	3.93	3.9	3.95	-0.05	0.981	0.993	3	3	18.82	6.65	19.36	26.32	4.06	16	+	+	+	+	+	+	CG4622
chr2L	10841960	10842460	501	*	3.57	3.58	3.55	0.03	0.982	0.993	1	2	11.85	7.9	16.13	12.67	15.59	7	+	-	-	-	+	+	CG6700
chr2R	10764846	10765346	501	*	2.55	2.51	2.59	-0.08	0.982	0.993	2	1	4.88	3.33	8.87	3.9	0.16	14	+	-	+	-	-	+	CG33144
chrX	3332544	3333044	501	*	3.15	3.12	3.18	-0.06	0.984	0.993	2	1	19.51	3.33	3.23	7.8	1.46	18	+	-	+	+	-	-	dnc
chrX	11422215	11422715	501	*	3.76	3.74	3.78	-0.05	0.984	0.993	1	2	20.91	3.74	15.33	16.57	2.76	22	+	-	-	+	-	+	Gs2
chrX	19322776	19323276	501	*	3.89	3.88	3.9	-0.02	0.987	0.996	2	3	13.24	9.14	21.78	21.44	11.2	12	+	+	-	+	+	+	out
chr3R	6002889	6003389	501	*	3.66	3.64	3.68	-0.04	0.987	0.996	1	1	16.73	1.25	19.36	16.57	0.81	21	+	-	-	-	-	+	Rm62
chrX	16868238	16868738	501	*	2.71	2.67	2.74	-0.07	0.989	0.997	1	1	9.76	2.91	6.45	4.87	0.16	15	+	-	-	-	-	+	CG13003
chr3R	29392673	29393173	501	*	2.4	2.39	2.41	-0.02	0.991	0.998	1	3	5.58	0.42	9.68	9.75	0.16	6	+	-	-	+	+	+	Ptp99A
chr2L	14627349	14627849	501	*	3.76	3.73	3.78	-0.04	0.992	0.999	3	3	10.45	14.13	15.33	11.7	2.44	27	+	+	+	+	+	+	osp
chr3R	18418554	18419054	501	*	2.94	2.93	2.96	-0.03	0.993	0.999	2	3	11.85	2.08	8.87	13.65	1.62	8	+	-	+	+	+	+	fru
chrX	12839889	12840389	501	*	2.56	2.53	2.58	-0.06	0.994	0.999	2	2	8.36	1.66	7.26	6.82	0.16	11	+	-	+	+	-	+	Pde9
chr2R	13315340	13315840	501	*	3.1	3.08	3.11	-0.03	0.996	0.999	1	2	15.33	0.42	9.68	18.52	1.46	6	+	-	-	+	-	+
chr2R	20888573	20889073	501	*	2.47	2.46	2.48	-0.02	0.996	0.999	1	2	0.7	2.91	12.91	7.8	2.92	6	+	-	-	+	-	+	otp
chr2L	7905185	7906099	915	*	3.58	3.58	3.59	-0.01	0.997	0.999	2	1	16.03	0.42	19.36	24.37	1.79	10	+	-	+	+	-	-	Snoo
chr3R	9926657	9927157	501	*	2.54	2.52	2.56	-0.04	0.997	0.999	2	1	4.18	3.33	9.68	4.87	2.76	10	+	-	+	-	-	+	Glut4EF
chr3R	19727364	19727864	501	*	2.32	2.31	2.33	-0.02	0.997	0.999	2	2	0.7	0.42	13.71	3.9	0.16	11	+	-	+	+	-	+	GluClalpha
chrX	12702979	12703479	501	*	3.78	3.78	3.78	0	0.997	0.999	2	3	6.97	0.42	33.88	19.49	5.68	16	+	-	+	+	+	+	CG15725
chr3R	16371703	16372203	501	*	3.05	3.03	3.06	-0.02	0.997	0.999	2	2	10.45	0.42	13.71	13.65	1.3	10	+	-	+	+	-	+	CG10317
chrX	9013268	9013768	501	*	3.24	3.22	3.25	-0.03	0.998	0.999	1	1	9.76	2.91	15.33	12.67	2.92	13	+	-	-	+	-	-	rdgA
chr2R	19661729	19662229	501	*	5.41	5.42	5.41	0.02	1	1	3	1	41.81	42.4	44.37	42.89	53.26	31	+	+	+	-	+	-	CG11018
chrX	5008576	5009076	501	*	2.13	-0.64	3.02	-3.67	0.00688	1	1	1	0.7	0.42	0.81	8.77	1.62	14	+	-	-	-	-	+	FBgn0266096
chrX	8696078	8696578	501	*	2.12	-0.64	3.01	-3.65	0.0121	1	1	1	0.7	0.42	0.81	1.95	1.14	21	+	-	-	-	-	+	CG11294
chrUn_DS485255v1	395	895	501	*	2.13	-0.64	3.02	-3.66	0.0133	1	3	3	0.7	0.42	0.81	0.97	1.3	22	+	+	+	+	+	+
chr2R	16103748	16104248	501	*	1.96	-0.64	2.84	-3.48	0.0136	1	3	3	0.7	0.42	0.81	12.67	0.81	8	+	+	+	+	+	+	Rho1
chrX	8829374	8829874	501	*	2.09	-0.14	2.93	-3.06	0.0136	1	1	2	0.7	0.42	1.61	3.9	3.9	15	+	-	-	+	-	+
chr2R	17484175	17484675	501	*	1.63	2.45	-0.49	2.94	0.0137	1	3	3	4.18	4.16	8.07	0.97	0.16	1	+	+	+	+	+	+	NT5E-2
chr3R	22822414	22822914	501	*	1.63	2.45	-0.49	2.94	0.0137	1	2	1	4.18	4.16	8.07	0.97	0.16	1	+	-	+	-	-	+
chr2L	6783212	6783712	501	*	1.88	-0.64	2.75	-3.4	0.017	1	1	1	0.7	0.42	0.81	2.92	1.3	16	+	-	-	-	-	+	nrv1
chrX	8622192	8622692	501	*	1.89	-0.14	2.7	-2.84	0.0176	1	1	3	0.7	0.42	1.61	4.87	5.68	9	+	-	-	+	+	+
chrUn_DS485695v2	-122	378	501	*	1.6	-0.64	2.44	-3.08	0.0182	1	2	3	0.7	0.42	0.81	3.9	4.38	8	+	+	-	+	+	+
chr3L	21921785	21922285	501	*	1.73	2.57	-0.49	3.06	0.0217	1	2	2	7.67	0.42	9.68	0.97	0.16	1	+	-	+	+	-	+	mub
chrX	11644641	11645141	501	*	1.9	2.69	-0.02	2.72	0.022	1	2	1	3.48	6.23	9.68	0.97	0.97	1	+	-	+	-	-	+	Ptp10D
chr2R	5549890	5550390	501	*	2.03	2.79	0.34	2.46	0.0225	1	2	0	7.67	6.65	6.45	0.97	0.81	2	+	-	+	-	-	-
chr3L	21832464	21832964	501	*	2.13	0.26	2.91	-2.66	0.0227	1	1	2	0.7	2.08	0.81	5.85	8.77	8	+	-	-	-	+	+	Nopp140
chrX	11175933	11176433	501	*	1.97	-0.2	2.8	-3	0.0233	1	2	3	1.39	0.42	0.81	10.72	1.14	9	+	-	+	+	+	+
chr3R	6418895	6419395	501	*	2.03	-0.36	2.88	-3.24	0.0259	1	2	3	0.7	0.83	0.81	0.97	1.14	20	+	+	-	+	+	+	gpp
chr2R	10996138	10996638	501	*	1.54	-0.64	2.38	-3.02	0.0266	1	1	2	0.7	0.42	0.81	7.8	1.79	6	+	-	-	+	-	+	luna
chr2R	2785708	2786208	501	*	1.53	2.34	-0.49	2.83	0.0272	1	1	1	6.27	0.83	8.07	0.97	0.16	1	+	-	-	-	-	+	CG41378
chrX	14591053	14591553	501	*	1.57	2.35	-0.29	2.64	0.0281	1	1	1	8.36	2.91	4.03	0.97	0.49	1	+	-	-	+	-	-	sbm
chrX	17804678	17805178	501	*	1.54	-0.64	2.37	-3.02	0.0282	1	1	1	0.7	0.42	0.81	9.75	1.79	4	+	-	-	+	-	-	OdsH
chrUn_DS485509v1	775	1275	501	*	1.55	-0.64	2.39	-3.03	0.0287	1	0	2	0.7	0.42	0.81	0.97	3.73	11	-	-	-	-	+	+
chr3L	21692104	21692604	501	*	2.13	2.93	0.2	2.73	0.0299	1	2	1	11.15	0.42	11.29	1.95	0.49	1	+	-	+	+	-	-	CG32447
chrX	9674975	9675475	501	*	1.76	-0.2	2.56	-2.76	0.0315	1	1	2	1.39	0.42	0.81	7.8	1.95	8	+	-	-	+	-	+	nej
chr3R	12582406	12582906	501	*	1.25	2.02	-0.49	2.51	0.0336	1	1	1	2.79	3.74	5.65	0.97	0.16	1	+	-	-	+	-	-	Octbeta2R
chr3L	23671065	23671565	501	*	2.16	0.5	2.91	-2.4	0.0337	1	2	3	1.39	1.25	1.61	1.95	11.53	9	-	+	+	+	+	+	AGO3
chr2R	16366339	16366839	501	*	1.64	2.41	-0.11	2.52	0.035	1	2	1	2.79	8.31	4.84	0.97	0.81	1	+	-	+	-	-	+	CG15711
chr3R	13639898	13640398	501	*	2.19	0.41	2.96	-2.55	0.0354	1	1	1	0.7	2.49	0.81	8.77	3.57	11	+	-	-	-	-	+	sqd
chr3R	9835731	9836231	501	*	1.62	2.4	-0.19	2.59	0.0372	1	1	1	10.45	3.74	1.61	0.97	0.65	1	+	-	-	+	-	-	Teh1
chrX	7394754	7395254	501	*	1.15	1.89	-0.49	2.38	0.0402	1	2	1	4.18	3.74	3.23	0.97	0.16	1	+	-	+	+	-	-	CG1677
chr3L	9174848	9175348	501	*	1.65	2.41	-0.02	2.43	0.0402	1	1	2	4.88	4.57	6.45	0.97	0.97	1	+	-	-	-	+	+	Rdl
chrX	18907982	18908482	501	*	1.79	2.56	0.06	2.49	0.0405	1	2	0	1.39	4.16	12.1	0.97	0.16	2	+	-	+	-	-	-	CG7378
chr2R	9376569	9377069	501	*	1.47	2.27	-0.49	2.76	0.0413	1	1	1	2.79	0.42	11.29	0.97	0.16	1	+	-	-	-	-	+	CG13954
chr3R	14002419	14002919	501	*	1.98	0.14	2.76	-2.62	0.0425	1	1	3	2.09	0.42	0.81	0.97	4.38	15	+	-	-	+	+	+	rdx
chr2R	9662406	9662906	501	*	1.85	2.62	0.05	2.57	0.0452	1	1	3	8.36	0.42	9.68	1.95	0.16	1	+	-	-	+	+	+	Mmp2
chrX	6412315	6412815	501	*	1.86	2.65	-0.02	2.67	0.0468	1	1	2	6.27	0.42	12.1	0.97	0.97	1	+	-	-	+	-	+
chr3R	23074240	23074740	501	*	1.59	-0.64	2.42	-3.07	0.0471	1	1	1	0.7	0.42	0.81	2.92	0.16	13	+	-	-	+	-	-	Cow
chr2L	2319781	2320281	501	*	1.43	-0.64	2.25	-2.89	0.0489	1	1	3	0.7	0.42	0.81	9.75	0.49	4	+	-	-	+	+	+	CG9967
chrUn_CP007120v1	16969	17469	501	*	2.06	2.82	0.33	2.5	0.0509	1	0	2	12.54	7.9	0.81	0.97	1.79	1	-	-	-	-	+	+	FBgn0085753
chr2R	6490646	6491146	501	*	2.23	2.94	0.82	2.11	0.0511	1	2	0	6.27	4.57	12.1	0.97	0.32	4	+	-	+	-	-	-
chrX	7224900	7225400	501	*	1.95	0.07	2.74	-2.68	0.0541	1	1	2	0.7	0.83	1.61	0.97	1.14	18	+	-	-	+	-	+	CG9650
chrX	4019211	4019711	501	*	1.25	2.01	-0.49	2.5	0.0549	1	3	3	7.67	0.42	4.03	0.97	0.16	1	+	+	+	+	+	+
chr3R	6990039	6990539	501	*	1.14	-0.64	1.92	-2.56	0.0549	1	1	3	0.7	0.42	0.81	3.9	2.44	5	+	-	-	+	+	+	Antp
chr2R	6552854	6553354	501	*	1.84	0.24	2.58	-2.35	0.056	1	2	0	0.7	0.42	2.42	10.72	2.27	5	+	-	+	-	-	-	jing
chrX	6219507	6220007	501	*	1.85	2.55	0.45	2.1	0.0563	1	1	1	4.88	6.23	6.45	0.97	1.14	2	-	-	+	-	-	+	Btnd
chrX	20770654	20771154	501	*	1.86	-0.2	2.67	-2.87	0.0569	1	1	1	1.39	0.42	0.81	1.95	0.16	17	+	-	-	-	-	+	shakB
chr3R	7993523	7994023	501	*	1.24	2	-0.49	2.49	0.0577	1	2	3	0.7	1.66	9.68	0.97	0.16	1	+	-	+	+	+	+	ELOVL
chr2L	19178682	19179182	501	*	1.13	1.85	-0.38	2.23	0.0577	1	3	3	3.48	2.49	4.84	0.97	0.32	1	+	+	+	+	+	+	brat
chrX	18397832	18398332	501	*	1.06	1.79	-0.49	2.28	0.0604	1	2	3	6.27	3.33	0.81	0.97	0.16	1	+	-	+	+	+	+	CG32549
chrX	15816958	15817458	501	*	1.9	0.5	2.59	-2.1	0.0615	1	2	3	1.39	0.42	2.42	5.85	9.26	3	+	-	+	+	+	+	sd
chr2R	14026288	14026788	501	*	1.94	0.07	2.72	-2.66	0.0615	1	2	3	0.7	0.83	1.61	13.65	0.16	6	+	+	-	+	+	+	mam
chr3L	25516064	25516564	501	*	1.18	1.93	-0.49	2.42	0.0618	1	2	0	6.97	0.42	4.03	0.97	0.16	1	+	-	+	-	-	-	CG45782
chrX	13506180	13506680	501	*	1.54	2.27	-0.02	2.29	0.0619	1	1	2	3.48	2.91	8.07	0.97	0.97	1	+	-	-	-	+	+	Neto
chrX	13064542	13065042	501	*	1.73	0.14	2.47	-2.32	0.0657	1	1	2	2.09	0.42	0.81	7.8	1.79	7	+	-	-	+	-	+	rad
chr2R	11128544	11129044	501	*	0.92	1.62	-0.49	2.11	0.0666	1	2	0	3.48	2.49	3.23	0.97	0.16	1	+	-	+	-	-	-	Cyp12d1-d
chr3R	21798446	21798946	501	*	1.26	1.96	-0.19	2.16	0.0667	1	2	0	3.48	4.99	3.23	0.97	0.65	1	+	+	-	-	-	-	CASK
chr3R	29737950	29738450	501	*	1.53	0.07	2.25	-2.18	0.0669	1	2	1	0.7	0.83	1.61	5.85	4.38	4	-	+	+	-	+	-	CG7601
chr3R	11960607	11961107	501	*	2.26	0.99	2.92	-1.93	0.0705	1	1	3	0.7	1.25	4.03	3.9	11.85	7	-	-	+	+	+	+	aurA
chr3R	22868413	22868913	501	*	1.04	1.77	-0.49	2.26	0.071	1	3	3	6.97	0.83	2.42	0.97	0.16	1	+	+	+	+	+	+
chr3L	6443482	6443982	501	*	0.96	1.67	-0.49	2.16	0.0714	1	1	1	3.48	1.25	4.84	0.97	0.16	1	+	-	-	-	-	+	CG42747
chr2L	16804762	16805262	501	*	2.21	2.92	0.75	2.16	0.0714	1	2	0	11.15	6.65	4.84	0.97	3.09	1	+	-	+	-	-	-	CG13280
chr2R	9319269	9319769	501	*	1.18	1.94	-0.49	2.43	0.0737	1	2	1	1.39	0.42	9.68	0.97	0.16	1	+	-	+	-	-	+	CG13739
chr2L	19653276	19653776	501	*	1.46	2.18	-0.02	2.2	0.0778	1	2	2	6.27	1.66	5.65	0.97	0.97	1	+	-	+	-	+	+	Lar
chr2L	5604847	5605347	501	*	1.03	1.76	-0.49	2.25	0.0778	1	1	1	4.88	0.42	4.84	0.97	0.16	1	+	-	-	-	-	+	DIP-eta
chrX	9308652	9309152	501	*	1.03	1.76	-0.49	2.25	0.0778	1	3	3	4.88	0.42	4.84	0.97	0.16	1	+	+	+	+	+	+
chrX	6887663	6888163	501	*	1.44	-0.2	2.19	-2.38	0.0799	1	1	3	1.39	0.42	0.81	5.85	0.81	7	+	-	-	+	+	+
chrUn_DS483755v1	23	523	501	*	1.38	-0.36	2.15	-2.51	0.0802	1	3	3	0.7	0.83	0.81	5.85	0.49	7	+	+	+	+	+	+
chr2R	9566677	9567177	501	*	1.73	-0.14	2.51	-2.65	0.0817	1	2	1	0.7	0.42	1.61	0.97	0.16	16	+	-	+	-	-	+	Not1
chr3R	25782924	25783424	501	*	1.21	-0.64	2	-2.64	0.0828	1	3	3	0.7	0.42	0.81	6.82	0.16	5	+	+	+	+	+	+
chr2L	5051	5551	501	*	1.67	0.25	2.37	-2.12	0.0835	1	0	2	0.7	1.25	1.61	0.97	6.5	8	-	-	-	-	+	+	CG11023
chrUn_DS485964v1	-217	283	501	*	1.63	0.14	2.34	-2.2	0.0843	1	1	1	2.09	0.42	0.81	2.92	2.27	10	+	-	-	-	-	+
chr3R	12467349	12467849	501	*	1.41	-0.13	2.14	-2.27	0.0844	1	0	2	0.7	1.25	0.81	7.8	2.44	3	-	-	-	-	+	+	Hsp70Ba
chr3L	13493619	13494119	501	*	1.29	2.05	-0.38	2.43	0.0845	1	2	1	0.7	0.42	11.29	0.97	0.32	1	+	-	+	-	-	+	Tgi
chrX_DS484697v1_random	485	985	501	*	1.99	0.55	2.69	-2.14	0.0852	1	3	3	0.7	2.08	1.61	9.75	1.62	8	+	+	+	+	+	+
chr2R	2478099	2478599	501	*	1.64	2.33	0.27	2.06	0.0862	1	2	0	4.18	1.25	9.68	0.97	0.65	2	+	-	+	-	-	-
chr2R	11039947	11040447	501	*	1.97	2.63	0.72	1.91	0.0869	1	1	2	7.67	2.08	8.87	0.97	0.97	3	+	-	-	+	-	+	luna
chrX	18701791	18702291	501	*	0.95	1.65	-0.49	2.14	0.0898	1	2	3	4.18	0.42	4.84	0.97	0.16	1	+	-	+	+	+	+
chrX	19129316	19129816	501	*	1.65	0.24	2.36	-2.12	0.09	1	1	2	0.7	0.42	2.42	0.97	4.38	10	+	-	-	-	+	+	tgy
chrX	12486247	12486747	501	*	1.49	2.19	0.05	2.14	0.0902	1	2	1	7.67	0.42	5.65	1.95	0.16	1	+	-	+	+	-	-	Cpr11A
chr2L	20941118	20941618	501	*	1.63	0.08	2.36	-2.28	0.0907	1	1	1	0.7	1.66	0.81	3.9	1.46	10	+	-	-	-	-	+
chrX	10356717	10357217	501	*	1.54	0.08	2.25	-2.17	0.0918	1	1	2	0.7	1.66	0.81	5.85	2.44	6	+	-	-	-	+	+	l(1)G0289
chr2R	18003065	18003565	501	*	0.99	1.7	-0.49	2.19	0.0919	1	1	2	2.09	0.42	7.26	0.97	0.16	1	+	-	-	+	-	+	dpr13
chrX	5284430	5284930	501	*	0.99	1.7	-0.49	2.19	0.0919	1	1	2	2.09	0.42	7.26	0.97	0.16	1	+	-	-	+	-	+
chrX	10697956	10698456	501	*	1.88	2.57	0.46	2.11	0.0957	1	1	3	6.97	0.42	10.49	0.97	0.16	3	+	-	-	+	+	+	X11Lbeta
chrX	20942047	20942547	501	*	0.94	1.62	-0.38	2.01	0.0967	1	3	3	5.58	1.25	2.42	0.97	0.32	1	+	+	+	+	+	+
chrX	13460857	13461357	501	*	1.11	-0.64	1.88	-2.52	0.0985	1	1	2	0.7	0.42	0.81	5.85	0.16	5	+	-	-	+	-	+	Neto
chrX	1717219	1717719	501	*	1.1	-0.64	1.87	-2.52	0.0997	1	1	1	0.7	0.42	0.81	6.82	0.16	4	+	-	-	+	-	-
chr2R	4224857	4225357	501	*	1.49	0.19	2.17	-1.98	0.0997	1	0	3	1.39	0.42	1.61	0.97	6.5	6	-	-	-	+	+	+
chrX	9025661	9026161	501	*	1.88	0.5	2.57	-2.07	0.1	1	1	3	1.39	0.42	2.42	6.82	0.97	10	+	-	-	+	+	+	rdgA
chrX	7082549	7083049	501	*	2.22	0.99	2.87	-1.88	0.101	1	0	3	0.7	0.42	4.84	5.85	4.06	12	-	-	-	+	+	+	Sxl
chr3R	10035124	10035624	501	*	0.77	1.43	-0.49	1.92	0.101	1	1	2	2.79	1.25	4.03	0.97	0.16	1	+	-	-	+	-	+	Mical
chrY_DS485113v1_random	399	899	501	*	0.84	1.51	-0.49	2	0.103	1	2	1	0.7	7.07	0.81	0.97	0.16	1	-	+	+	-	+	-
chrUn_CP007085v1	28739	29239	501	*	2.01	0.81	2.65	-1.84	0.103	1	0	2	2.79	1.66	0.81	1.95	9.9	7	-	-	-	-	+	+
chr3R	19802497	19802997	501	*	0.88	-0.64	1.6	-2.24	0.104	1	2	0	0.7	0.42	0.81	0.97	2.11	6	+	+	-	-	-	-	bnl
chr2L	4020226	4020726	501	*	1.3	-0.14	2	-2.14	0.105	1	1	1	0.7	0.42	1.61	4.87	1.14	6	+	-	-	-	-	+
chr2L	7166609	7167109	501	*	2.02	2.66	0.85	1.81	0.106	1	2	1	3.48	3.33	12.1	1.95	1.46	2	+	-	+	-	-	+
chrY	2639273	2639773	501	*	1.69	2.37	0.4	1.97	0.106	1	2	1	2.09	2.08	11.29	0.97	0.97	2	+	-	+	-	+	-
chr2R	14514304	14514804	501	*	1.96	2.61	0.75	1.85	0.107	1	2	2	2.79	4.99	10.49	3.9	0.16	1	+	+	-	+	-	+	Cpr51A
chrX	9409235	9409735	501	*	2.02	2.68	0.78	1.9	0.107	1	1	1	6.27	1.66	11.29	0.97	0.16	4	+	-	-	-	-	+	mgl
chrX	2839674	2840174	501	*	0.77	1.44	-0.49	1.93	0.108	1	3	3	4.88	0.83	2.42	0.97	0.16	1	+	+	+	+	+	+	kirre
chr2R	20914824	20915324	501	*	1.22	-0.2	1.92	-2.12	0.108	1	1	1	1.39	0.42	0.81	4.87	1.46	5	+	-	-	-	-	+	FBgn0020617
chr3L	6169298	6169798	501	*	1.78	0.24	2.5	-2.27	0.108	1	2	2	0.7	0.42	2.42	5.85	0.16	11	+	-	+	+	-	+	fmt
chr2L	20970737	20971237	501	*	1.12	-0.64	1.89	-2.54	0.109	1	3	3	0.7	0.42	0.81	0.97	0.16	10	+	+	+	+	+	+	CG42238
chrY_DS484706v1_random	-116	384	501	*	0.94	1.59	-0.29	1.88	0.11	1	1	1	2.09	2.91	4.03	0.97	0.49	1	+	-	-	+	-	-
chr3L	22767942	22768442	501	*	0.84	1.52	-0.49	2.01	0.112	1	1	1	6.97	0.83	0.81	0.97	0.16	1	+	-	-	-	-	+	SPoCk
chrX	11622679	11623179	501	*	0.93	-0.64	1.66	-2.31	0.112	1	1	1	0.7	0.42	0.81	5.85	0.65	3	+	-	-	+	-	-	Ptp10D
chrX	21351243	21351743	501	*	1.77	0.56	2.42	-1.86	0.113	1	1	3	2.79	0.83	0.81	6.82	3.25	6	+	-	-	+	+	+	sol
chr2R	3985577	3986077	501	*	1.48	0.24	2.13	-1.9	0.114	1	0	2	0.7	0.42	2.42	2.92	3.25	7	-	-	-	-	+	+
chrUn_DS484484v1	1706	2206	501	*	0.94	-0.64	1.68	-2.32	0.115	1	3	3	0.7	0.42	0.81	7.8	0.81	1	+	+	+	+	+	+
chr2R	18316266	18316766	501	*	1.8	0.42	2.49	-2.07	0.117	1	1	1	2.79	0.42	0.81	3.9	0.97	12	+	-	-	-	-	+	sbb
chr2L	16120918	16121418	501	*	1.8	2.49	0.46	2.02	0.118	1	1	1	3.48	0.42	12.91	0.97	0.16	3	+	-	-	-	-	+
chrX	10615910	10616410	501	*	0.88	-0.64	1.6	-2.25	0.12	1	1	2	0.7	0.42	0.81	0.97	1.14	7	+	-	-	-	+	+	CG43347
chr2L	21540694	21541194	501	*	1.69	0.51	2.33	-1.82	0.121	1	3	3	1.39	2.08	0.81	4.87	5.2	5	+	+	+	+	+	+	FBgn0051614
chr3L	13292073	13292573	501	*	1.19	1.82	0.05	1.76	0.121	1	3	3	4.88	1.66	4.03	1.95	0.16	1	+	+	+	+	+	+	FBgn0264513
chrX	17686330	17686830	501	*	0.78	-0.64	1.48	-2.13	0.122	1	2	1	0.7	0.42	0.81	2.92	1.46	4	+	-	+	+	-	-	chas
chr3R	14378870	14379370	501	*	0.99	-0.64	1.73	-2.38	0.122	1	1	1	0.7	0.42	0.81	6.82	0.16	3	+	-	-	-	-	+	FBgn0266248
chr2R	11441326	11441826	501	*	2.03	2.64	0.93	1.72	0.123	1	1	3	6.97	2.91	8.87	2.92	1.79	1	+	-	-	+	+	+	Prip
chrX	23431256	23432186	931	*	1.45	0.08	2.14	-2.06	0.123	1	3	2	0.7	1.66	0.81	0.97	3.25	9	+	+	+	-	+	+
chrX	6843067	6843567	501	*	1.15	1.81	-0.11	1.92	0.124	1	2	3	0.7	5.82	4.03	0.97	0.81	1	+	+	-	+	+	+	CG14435
chrX	13401565	13402065	501	*	0.92	1.57	-0.29	1.85	0.125	1	2	0	0.7	4.16	4.03	0.97	0.49	1	+	-	+	-	-	-	CG12725
chr2R	3990225	3990725	501	*	0.62	-0.64	1.29	-1.93	0.125	1	0	2	0.7	0.42	0.81	0.97	5.36	1	-	-	-	-	+	+
chrX	1386967	1387467	501	*	0.62	-0.64	1.29	-1.93	0.125	1	1	1	0.7	0.42	0.81	0.97	5.36	1	+	-	-	-	+	-	CG32813
chr3R	15302146	15302646	501	*	0.78	1.44	-0.49	1.93	0.125	1	1	1	2.09	0.42	5.65	0.97	0.16	1	+	-	-	-	-	+	Tm1
chr3R	31837960	31838460	501	*	1.94	0.36	2.67	-2.31	0.125	1	1	1	1.39	1.66	0.81	0.97	0.16	18	+	-	-	-	-	+	RhoGAP100F
chrX	12776112	12776612	501	*	0.69	-0.64	1.37	-2.01	0.126	1	0	3	0.7	0.42	0.81	0.97	2.76	4	-	-	-	+	+	+	CG32647
chr3L	21174824	21175324	501	*	0.64	1.27	-0.49	1.76	0.128	1	2	2	0.7	2.49	4.03	0.97	0.16	1	+	+	-	+	-	+	chb
chrX	14708006	14708506	501	*	0.82	-0.64	1.53	-2.18	0.129	1	1	2	0.7	0.42	0.81	4.87	0.81	3	+	-	-	+	-	+	NetB
chr2R	24538817	24539317	501	*	1.35	2.02	0.05	1.97	0.129	1	2	2	2.09	0.42	9.68	1.95	0.16	1	+	-	+	+	-	+	CG4622
chr2R	3137364	3137864	501	*	0.79	1.46	-0.49	1.95	0.129	1	1	1	1.39	0.42	6.45	0.97	0.16	1	-	-	+	-	+	-	dpr21
chr3R	8959180	8959680	501	*	0.91	1.58	-0.38	1.96	0.129	1	1	3	2.09	0.42	6.45	0.97	0.32	1	+	-	-	+	+	+	FBgn0037645
chr2L	21418677	21419177	501	*	1.96	0.53	2.67	-2.14	0.131	1	3	3	0.7	0.42	3.23	3.9	0.16	15	+	+	+	+	+	+	His1
chrY_DS484021v1_random	1630	2130	501	*	1.41	2.07	0.13	1.95	0.131	1	1	1	0.7	7.9	4.03	0.97	1.3	1	-	+	-	-	+	-
chr2R	2558178	2558678	501	*	0.72	1.36	-0.49	1.85	0.132	1	1	1	4.88	0.42	2.42	0.97	0.16	1	+	-	-	-	-	+	MFS17
chrX	18879944	18880444	501	*	0.77	-0.64	1.47	-2.11	0.133	1	2	3	0.7	0.42	0.81	5.85	1.46	1	+	-	+	+	+	+	CG34401
chrX	12073935	12074435	501	*	1.28	1.91	0.13	1.78	0.134	1	2	1	0.7	3.33	7.26	1.95	0.32	1	+	-	+	+	-	-	moon
chrX	4030992	4031492	501	*	0.57	1.18	-0.49	1.67	0.134	1	1	1	3.48	2.49	0.81	0.97	0.16	1	+	-	-	-	-	+
chr3R	28239318	28239818	501	*	0.78	1.45	-0.49	1.94	0.134	1	1	3	6.97	0.42	0.81	0.97	0.16	1	+	-	-	+	+	+	CG34354
chr3R	31420440	31420940	501	*	0.78	1.45	-0.49	1.94	0.134	1	2	2	6.97	0.42	0.81	0.97	0.16	1	+	-	+	+	-	+	Gprk2
chrX_DS485691v1_random	185	685	501	*	2.22	2.82	1.17	1.65	0.135	1	2	2	6.97	3.74	10.49	0.97	2.76	3	+	+	-	-	+	+
chr3L	1506831	1507331	501	*	1.56	2.24	0.26	1.97	0.135	1	1	1	2.79	1.66	9.68	0.97	1.62	1	+	-	-	-	+	-	cue
chrX	15259291	15259791	501	*	1.13	1.73	0.06	1.67	0.136	1	1	3	1.39	3.74	4.84	0.97	0.16	2	+	-	-	+	+	+
chr3L	19932296	19932796	501	*	1.52	2.13	0.45	1.68	0.136	1	2	0	4.18	2.49	6.45	2.92	0.16	1	+	-	+	-	-	-	RhoGDI
chr3R	20441357	20441857	501	*	2.28	2.87	1.25	1.63	0.139	1	1	2	9.76	3.33	8.87	1.95	0.16	5	+	-	-	+	-	+	Gfrl
chr2L	7961014	7961514	501	*	2	0.75	2.66	-1.9	0.142	1	1	1	1.39	1.25	2.42	1.95	0.97	16	+	-	-	-	-	+	Snoo
chr2R	17820652	17821152	501	*	1.66	0.36	2.33	-1.98	0.143	1	1	1	1.39	0.83	1.61	0.97	1.14	13	+	-	-	+	-	-	grh
chrX	6624063	6624563	501	*	1.1	-0.14	1.75	-1.89	0.145	1	0	2	0.7	0.42	1.61	6.82	2.27	1	-	-	-	+	-	+	pigs
chr3R	8299809	8300309	501	*	0.87	-0.64	1.59	-2.24	0.145	1	1	1	0.7	0.42	0.81	3.9	0.16	5	+	-	-	+	-	-	CG9626
chrX	16146744	16147244	501	*	0.61	-0.64	1.27	-1.92	0.149	1	3	3	0.7	0.42	0.81	0.97	2.27	4	+	+	+	+	+	+	disco-r
chrX	16132912	16133412	501	*	0.63	1.25	-0.49	1.74	0.15	1	3	3	3.48	0.42	3.23	0.97	0.16	1	+	+	+	+	+	+	disco-r
chrX	7124521	7125021	501	*	1.98	0.81	2.62	-1.82	0.15	1	1	1	0.7	3.74	0.81	3.9	3.57	11	+	-	-	+	-	-
chr2R	20600042	20600542	501	*	1.34	0.24	1.96	-1.73	0.152	1	3	3	0.7	0.42	2.42	0.97	4.71	6	+	+	+	+	+	+	HnRNP-K
chrX	4616588	4617088	501	*	2.15	1.15	2.73	-1.59	0.153	1	1	3	2.09	3.74	0.81	7.8	8.12	4	-	-	+	+	+	+	peb
chrX	22861771	22862271	501	*	1.92	0.78	2.54	-1.77	0.154	1	1	3	0.7	0.42	4.03	4.87	1.62	11	+	-	-	+	+	+	CG42346
chr3R	20140474	20140974	501	*	2.19	0.99	2.84	-1.85	0.154	1	1	3	0.7	0.42	4.84	5.85	0.65	15	+	-	-	+	+	+	FBgn0262025
chr2R	7787686	7788186	501	*	0.88	-0.64	1.61	-2.25	0.155	1	2	0	0.7	0.42	0.81	0.97	0.16	8	+	-	+	-	-	-	FBgn0000337
chr3R	14363214	14363714	501	*	1.07	-0.2	1.73	-1.93	0.157	1	2	3	1.39	0.42	0.81	6.82	1.14	2	+	-	+	+	+	+	NK7.1
chrX	18562447	18562947	501	*	1.07	-0.2	1.73	-1.93	0.157	1	1	3	1.39	0.42	0.81	6.82	1.14	2	+	-	-	+	+	+	FBgn0052546
chrX	8371884	8372384	501	*	1.13	1.79	-0.11	1.89	0.157	1	3	3	3.48	0.42	6.45	0.97	0.81	1	+	+	+	+	+	+
chr3L	10198248	10198748	501	*	1.09	1.66	0.14	1.53	0.157	1	2	3	4.18	2.91	2.42	0.97	0.32	2	+	+	-	+	+	+	ect
chrX	19382407	19382907	501	*	1.66	2.3	0.5	1.8	0.158	1	3	3	4.18	3.33	7.26	0.97	2.27	1	+	+	+	+	+	+	kek5
chrX	5414375	5414875	501	*	0.59	-0.64	1.24	-1.88	0.158	1	1	2	0.7	0.42	0.81	0.97	2.11	4	+	-	-	+	-	+	spoon
chrX_DS485044v1_random	658	1158	501	*	1.3	-0.13	2.01	-2.13	0.158	1	2	3	0.7	1.25	0.81	3.9	0.16	8	+	-	+	+	+	+
chr2R	25281161	25281661	501	*	1.96	2.59	0.84	1.74	0.16	1	1	1	4.88	8.31	4.84	0.97	3.41	1	-	+	-	-	+	-
chr2R	16423586	16424086	501	*	2.02	2.6	1.03	1.57	0.16	1	1	1	8.36	4.16	5.65	0.97	0.16	5	+	-	-	-	-	+	Sema2b
chrX	17501719	17502219	501	*	0.57	1.18	-0.49	1.67	0.161	1	2	3	0.7	1.25	4.84	0.97	0.16	1	+	+	-	+	+	+	CG43658
chr3L	24187079	24187579	501	*	0.59	1.2	-0.49	1.69	0.163	1	1	1	4.88	0.42	1.61	0.97	0.16	1	+	-	-	-	-	+	Snap25
chrX	15127816	15128316	501	*	0.86	1.47	-0.19	1.66	0.163	1	1	1	4.18	2.49	1.61	0.97	0.65	1	+	-	-	-	-	+	drd
chr2L	9824717	9825217	501	*	1.14	1.76	0.05	1.7	0.164	1	1	1	4.88	0.42	4.84	1.95	0.16	1	+	-	-	-	-	+	nAChRalpha6
chr3R	4657667	4658167	501	*	0.45	1.01	-0.49	1.5	0.164	1	2	1	0.7	3.74	1.61	0.97	0.16	1	+	-	+	-	-	+	spartin
chr3R	1775501	1776001	501	*	0.63	-0.64	1.29	-1.93	0.164	1	3	3	0.7	0.42	0.81	4.87	1.46	1	+	+	+	+	+	+	Myo81F
chr2L	21438594	21439094	501	*	1.97	0.78	2.61	-1.83	0.165	1	3	3	0.7	0.42	4.03	7.8	0.49	10	+	+	+	+	+	+	FBgn0053811
chrX	8127207	8127707	501	*	0.83	1.48	-0.38	1.86	0.165	1	2	2	0.7	0.42	7.26	0.97	0.32	1	+	-	+	+	-	+	cyr
chr4	579639	580139	501	*	1.19	-0.2	1.89	-2.09	0.166	1	2	3	1.39	0.42	0.81	1.95	0.16	9	+	+	-	+	+	+	CG1909
chr3L	27150631	27151131	501	*	0.61	-0.64	1.27	-1.92	0.167	1	1	3	0.7	0.42	0.81	1.95	1.3	4	+	-	-	+	+	+	vtd
chrUn_DS485504v1	366	866	501	*	0.61	-0.64	1.27	-1.92	0.167	1	1	3	0.7	0.42	0.81	1.95	1.3	4	+	-	-	+	+	+
chrX	4717995	4718495	501	*	1.63	0.31	2.31	-1.99	0.168	1	1	1	2.09	0.83	0.81	11.7	0.16	3	+	-	-	+	-	-	Proc-R
chr3L	7545015	7545515	501	*	0.55	-0.64	1.19	-1.83	0.17	1	1	1	0.7	0.42	0.81	3.9	1.95	1	+	-	-	+	-	-	CG32376
chrX	7248933	7249433	501	*	0.55	-0.64	1.19	-1.83	0.17	1	2	2	0.7	0.42	0.81	3.9	1.95	1	+	-	+	+	-	+	FBgn0265457
chr2R	13479895	13480395	501	*	0.42	0.97	-0.49	1.46	0.17	1	2	0	1.39	2.08	2.42	0.97	0.16	1	+	-	+	-	-	-	arr
chr3R	24079573	24080073	501	*	1.57	2.19	0.45	1.73	0.172	1	3	3	0.7	2.49	10.49	0.97	1.14	2	+	+	+	+	+	+	eIF4EHP
chrX_DS484143v1_random	949	1449	501	*	0.4	0.95	-0.49	1.44	0.172	1	2	1	2.09	2.08	1.61	0.97	0.16	1	-	+	+	-	+	-
chr3R	9168358	9168858	501	*	0.53	1.12	-0.49	1.61	0.172	1	1	1	4.88	0.83	0.81	0.97	0.16	1	+	-	-	+	-	-	pum
chrUn_DS485342v1	695	1195	501	*	2.25	2.83	1.27	1.56	0.173	1	2	1	2.09	7.9	11.29	0.97	3.25	3	+	+	-	-	+	-
chr3R	28970386	28970886	501	*	2.19	2.79	1.14	1.65	0.173	1	3	3	9.06	0.42	11.29	0.97	1.62	4	+	+	+	+	+	+	DIP-gamma
chr2L	6799530	6800030	501	*	1.06	1.67	-0.02	1.69	0.175	1	2	0	2.09	6.65	0.81	0.97	0.97	1	+	-	+	-	-	-	nrv2
chrY	2124831	2125331	501	*	1.5	0.47	2.09	-1.63	0.175	1	0	2	2.09	1.25	0.81	4.87	2.92	5	-	-	-	+	+	-
chrX	5223830	5224330	501	*	1.3	1.91	0.21	1.7	0.176	1	1	1	2.79	0.42	8.07	0.97	0.49	2	+	-	-	+	-	-	CG15465
chr2L	3351268	3351768	501	*	1.41	1.98	0.46	1.51	0.176	1	3	3	4.88	2.08	4.84	0.97	0.16	3	+	+	+	+	+	+	E23
chrX	21257207	21257707	501	*	0.57	1.18	-0.49	1.67	0.178	1	1	1	5.58	0.42	0.81	0.97	0.16	1	+	-	-	-	-	+	CG32521
chrX	17639887	17640387	501	*	1.46	2.11	0.26	1.84	0.182	1	1	3	7.67	0.42	4.84	0.97	1.62	1	+	-	-	+	+	+	RhoGAPp190
chrX	6189486	6189986	501	*	1.67	0.42	2.33	-1.91	0.183	1	1	2	2.79	0.42	0.81	4.87	0.16	10	+	-	-	+	-	+	Ca-alpha1T
chr3R	3813131	3813631	501	*	0.74	-0.64	1.44	-2.08	0.183	1	1	1	0.7	0.42	0.81	1.95	0.16	6	+	-	-	-	-	+
chrY	1642208	1642708	501	*	0.74	-0.64	1.44	-2.08	0.183	1	3	3	0.7	0.42	0.81	1.95	0.16	6	+	+	+	+	+	+	Ppr-Y
chr3R	3819922	3820422	501	*	0.38	0.92	-0.49	1.41	0.184	1	1	1	2.79	2.08	0.81	0.97	0.16	1	+	-	-	-	-	+
chr2R	7755563	7756063	501	*	1.77	2.35	0.81	1.53	0.184	1	2	3	3.48	2.08	9.68	0.97	1.3	3	+	-	+	+	+	+	CG46385
chrUn_DS483738v1	314	814	501	*	0.79	1.4	-0.29	1.69	0.184	1	2	0	3.48	0.42	4.03	0.97	0.49	1	+	-	+	-	-	-
chr3R	26803386	26803886	501	*	1.16	0.14	1.75	-1.61	0.185	1	1	2	2.09	0.42	0.81	4.87	4.22	1	+	-	-	+	-	+	FBgn0086060
chr3R	3865585	3866085	501	*	1.46	2.12	0.2	1.93	0.186	1	1	2	11.85	0.42	0.81	0.97	1.46	1	+	-	-	-	+	+	CG41099
chr3R	17901137	17901637	501	*	1.34	1.93	0.33	1.61	0.186	1	1	3	4.18	0.83	6.45	1.95	0.81	1	+	-	-	+	+	+	Rim
chrUn_DS484806v1	1122	1622	501	*	1.89	2.49	0.84	1.65	0.186	1	1	3	8.36	0.42	8.07	2.92	1.46	1	+	-	-	+	+	+
chr3R	7652303	7652803	501	*	0.35	0.88	-0.49	1.37	0.187	1	1	1	1.39	3.33	0.81	0.97	0.16	1	+	-	-	-	-	+
chr3R	22596383	22596883	501	*	2.15	1.12	2.75	-1.63	0.187	1	1	3	4.88	0.83	0.81	12.67	1.46	6	+	-	-	+	+	+	Efa6
chrX	12023330	12023830	501	*	1.87	0.81	2.47	-1.67	0.188	1	1	2	0.7	3.74	0.81	3.9	3.73	9	-	+	-	+	-	+	Usp7
chr3R	12334740	12335240	501	*	0.75	-0.64	1.44	-2.08	0.189	1	1	2	0.7	0.42	0.81	0.97	0.16	7	+	-	-	+	-	+	FBgn0266246
chrX	6487783	6488283	501	*	0.75	-0.64	1.44	-2.08	0.189	1	1	1	0.7	0.42	0.81	0.97	0.16	7	+	-	-	-	-	+	CG42340
chr3R	8308637	8309137	501	*	1.96	1.07	2.51	-1.43	0.189	1	1	1	3.48	0.42	2.42	4.87	5.2	7	+	-	-	-	-	+	tex
chr2R	19042504	19043004	501	*	0.38	0.92	-0.49	1.41	0.189	1	3	3	0.7	4.16	0.81	0.97	0.16	1	+	+	+	+	+	+
chr3L	10028147	10028647	501	*	1.5	2.1	0.45	1.65	0.191	1	3	3	2.79	0.42	9.68	1.95	0.16	2	+	+	+	+	+	+	dpr6
chr3R	17648124	17648624	501	*	0.57	1.17	-0.49	1.66	0.191	1	1	1	0.7	0.42	5.65	0.97	0.16	1	+	-	-	-	-	+	CG14322
chr2L	4326916	4327416	501	*	0.51	-0.64	1.14	-1.78	0.192	1	2	3	0.7	0.42	0.81	0.97	1.62	4	+	+	-	+	+	+	bdl
chr3R	22870950	22871450	501	*	0.72	-0.64	1.41	-2.06	0.193	1	1	1	0.7	0.42	0.81	6.82	0.16	1	+	-	-	-	-	+
chrUn_DS485089v1	904	1404	501	*	0.72	-0.64	1.41	-2.06	0.193	1	1	2	0.7	0.42	0.81	6.82	0.16	1	-	-	+	-	+	+
chrX	9794914	9795414	501	*	0.72	-0.64	1.41	-2.06	0.193	1	1	3	0.7	0.42	0.81	6.82	0.16	1	+	-	-	+	+	+	CARPB
chrX	22395311	22395811	501	*	1.89	2.49	0.84	1.65	0.194	1	1	1	4.18	5.4	7.26	0.97	3.41	1	-	+	-	-	+	-
chrX	1510715	1511215	501	*	0.85	1.48	-0.29	1.77	0.196	1	2	0	0.7	0.42	7.26	0.97	0.49	1	+	-	+	-	-	-	inc
chrX	8790487	8790987	501	*	1.42	2.05	0.26	1.79	0.197	1	2	1	5.58	0.42	6.45	0.97	1.62	1	+	-	+	-	-	+	Lim1
chr3L	24531820	24532320	501	*	1.82	2.4	0.84	1.55	0.197	1	1	2	7.67	2.49	5.65	1.95	2.44	1	+	-	-	-	+	+	FBgn0040045
chr3L	1011029	1011529	501	*	2.08	1.02	2.68	-1.66	0.198	1	3	3	4.88	0.42	0.81	14.62	1.62	3	+	+	+	+	+	+	trio
chr2R	3002861	3003361	501	*	0.32	-0.64	0.89	-1.53	0.198	1	0	3	0.7	0.42	0.81	0.97	3.57	1	-	-	-	+	+	+
chrX	23153731	23154231	501	*	1.36	1.91	0.46	1.45	0.199	1	3	0	5.58	1.66	4.03	0.97	0.16	3	+	+	+	-	-	-
chr2L	6582904	6583404	501	*	1.31	0.14	1.95	-1.8	0.2	1	2	1	2.09	0.42	0.81	9.75	0.81	1	+	-	+	+	-	-	CG11319
chr2R	472936	473436	501	*	1.06	1.63	0.13	1.5	0.201	1	1	1	2.79	0.83	5.65	1.95	0.32	1	+	-	-	-	-	+	DIP-lambda
chr2L	16661167	16661667	501	*	2.18	2.77	1.19	1.58	0.203	1	2	0	6.27	0.42	13.71	3.9	1.95	1	+	-	+	-	-	-	mtgo
chr3R	8444966	8445466	501	*	1.78	2.36	0.78	1.59	0.205	1	1	1	6.97	0.42	8.07	0.97	0.16	4	+	-	-	-	-	+	CG45263
chrY	322485	322985	501	*	0.48	-0.64	1.1	-1.75	0.206	1	1	3	0.7	0.42	0.81	0.97	1.46	4	+	-	-	+	+	+
chr3L	15842907	15843407	501	*	2.04	2.62	1.03	1.59	0.213	1	1	1	13.24	0.42	4.84	0.97	0.16	5	+	-	-	-	+	-	meru
chr2R	11162250	11162750	501	*	2.23	2.73	1.47	1.26	0.214	1	2	1	8.36	7.48	4.03	5.85	1.46	1	+	+	-	+	-	-	shn
chrX	4094832	4095332	501	*	1.58	2.11	0.72	1.39	0.215	1	1	1	7.67	2.08	3.23	0.97	0.97	3	+	-	-	-	-	+
chrX	20024885	20025385	501	*	1.85	2.37	1.01	1.36	0.215	1	3	1	4.88	5.82	4.84	4.87	0.16	1	+	+	+	-	+	-	FBgn0052826
chrX	4466303	4466803	501	*	1.36	1.91	0.46	1.45	0.216	1	1	1	2.79	1.25	7.26	0.97	0.16	3	+	-	-	+	-	-	bi
chr2R	3943155	3943655	501	*	1.53	0.63	2.08	-1.45	0.216	1	0	2	1.39	0.83	2.42	0.97	10.72	1	-	-	-	-	+	+	uex
chr2R	22617375	22617875	501	*	2.09	1.07	2.67	-1.6	0.216	1	1	3	3.48	0.42	2.42	12.67	0.49	6	+	-	-	+	+	+	CG33143
chr3R	27572026	27572526	501	*	1.96	0.78	2.6	-1.82	0.218	1	1	1	0.7	0.42	4.03	0.97	0.16	17	+	-	-	-	-	+	wdb
chrX	8815884	8816384	501	*	1.94	2.49	1.01	1.48	0.219	1	1	1	5.58	0.83	10.49	3.9	0.16	2	+	-	-	-	-	+
chr2L	19627101	19627601	501	*	0.97	1.52	0.06	1.46	0.219	1	1	3	4.18	0.42	4.03	0.97	0.16	2	+	-	-	+	+	+	Lar
chr3R	20475649	20476149	501	*	0.44	-0.64	1.05	-1.69	0.223	1	1	1	0.7	0.42	0.81	3.9	1.3	1	+	-	-	+	-	-	Gfrl
chrX	21471807	21472307	501	*	0.37	0.91	-0.49	1.4	0.223	1	3	3	2.79	0.42	2.42	0.97	0.16	1	+	+	+	+	+	+
chr3R	14986079	14986579	501	*	1.9	2.46	0.97	1.49	0.224	1	1	1	5.58	0.42	10.49	3.9	0.97	1	+	-	-	-	-	+
chrX	8968670	8969170	501	*	1.49	2	0.71	1.29	0.225	1	3	3	4.18	4.57	3.23	2.92	0.97	1	+	+	+	+	+	+	rdgA
chr3L	7869489	7869989	501	*	0.25	0.73	-0.49	1.22	0.226	1	1	1	2.09	2.08	0.81	0.97	0.16	1	+	-	-	+	-	-	Pdp1
chrUn_DS485031v1	834	1334	501	*	0.87	1.48	-0.19	1.67	0.229	1	1	2	0.7	0.42	7.26	0.97	0.65	1	+	-	-	-	+	+
chr2L	17729056	17729556	501	*	0.43	0.99	-0.49	1.48	0.23	1	3	1	0.7	0.42	4.84	0.97	0.16	1	+	+	+	-	+	-	CadN
chr2L	18027914	18028414	501	*	0.43	0.99	-0.49	1.48	0.23	1	3	3	0.7	0.42	4.84	0.97	0.16	1	+	+	+	+	+	+	rdo
chr3L	17066713	17067213	501	*	0.43	0.99	-0.49	1.48	0.23	1	1	1	0.7	0.42	4.84	0.97	0.16	1	+	-	-	-	-	+	Rbp6
chr3R	1994411	1994911	501	*	0.43	0.99	-0.49	1.48	0.23	1	1	2	0.7	0.42	4.84	0.97	0.16	1	-	-	+	-	+	+	Myo81F
chr3R	13516261	13516761	501	*	0.43	0.99	-0.49	1.48	0.23	1	1	1	0.7	0.42	4.84	0.97	0.16	1	+	-	-	+	-	-
chrX	11552611	11553111	501	*	0.43	0.99	-0.49	1.48	0.23	1	2	0	0.7	0.42	4.84	0.97	0.16	1	+	-	+	-	-	-	Drak
chrX	13501180	13501680	501	*	0.43	0.99	-0.49	1.48	0.23	1	2	3	0.7	0.42	4.84	0.97	0.16	1	+	-	+	+	+	+	Neto
chr2L	4184082	4184582	501	*	2.09	2.58	1.33	1.26	0.23	1	1	3	4.18	3.33	10.49	3.9	1.62	2	+	-	-	+	+	+	FBgn0264866
chr3L	8065518	8066018	501	*	1.9	1.1	2.41	-1.31	0.231	1	3	1	0.7	2.49	3.23	3.9	6.01	6	+	+	+	-	+	-	FBgn0052361
chrX	19989289	19989789	501	*	2.24	2.81	1.28	1.53	0.231	1	1	2	2.09	0.42	18.55	0.97	1.3	5	+	-	-	-	+	+
chr3R	29282661	29283161	501	*	0.35	0.88	-0.49	1.37	0.232	1	1	3	3.48	0.42	1.61	0.97	0.16	1	+	-	-	+	+	+
chr3R	25723983	25724483	501	*	1.22	0.08	1.85	-1.77	0.232	1	1	1	0.7	1.66	0.81	0.97	0.81	9	+	-	-	-	-	+	LpR2
chr3R	8448930	8449430	501	*	0.58	-0.64	1.23	-1.87	0.233	1	3	3	0.7	0.42	0.81	4.87	0.16	2	+	+	+	+	+	+	CG45263
chrY	323279	323779	501	*	0.59	-0.64	1.25	-1.89	0.235	1	0	2	0.7	0.42	0.81	0.97	0.16	6	-	-	-	-	+	+
chrY	3560148	3560648	501	*	0.59	-0.64	1.25	-1.89	0.235	1	3	3	0.7	0.42	0.81	0.97	0.16	6	+	+	+	+	+	+	ORY
chr2L	14984270	14984770	501	*	0.22	0.69	-0.49	1.18	0.24	1	1	2	0.7	3.33	0.81	0.97	0.16	1	-	-	+	-	+	+	mol
chr3L	23341123	23341623	501	*	0.22	0.69	-0.49	1.18	0.24	1	1	2	0.7	3.33	0.81	0.97	0.16	1	+	-	-	-	+	+	ND-MLRQ
chrX	3364315	3364815	501	*	0.57	-0.64	1.22	-1.87	0.24	1	2	2	0.7	0.42	0.81	5.85	0.16	1	+	-	+	+	-	+	FBgn0267963
chrX	4760050	4760550	501	*	0.97	-0.2	1.61	-1.8	0.241	1	2	0	1.39	0.42	0.81	0.97	0.16	8	+	-	+	-	-	-
chr3L	8885113	8885613	501	*	1.38	1.99	0.33	1.66	0.243	1	1	3	9.06	0.42	2.42	0.97	1.79	1	+	-	-	+	+	+	dally
chrX	5338527	5339027	501	*	0.36	0.85	-0.38	1.23	0.243	1	3	3	2.09	2.49	0.81	0.97	0.32	1	+	+	+	+	+	+	SK
chrX	10294471	10294971	501	*	0.19	0.65	-0.49	1.14	0.245	1	1	1	1.39	2.49	0.81	0.97	0.16	1	+	-	-	-	-	+	alpha-Man-Ia
chr2L	15763358	15763858	501	*	1.42	2.04	0.33	1.71	0.245	1	2	3	1.39	0.42	10.49	0.97	1.79	1	+	-	+	+	+	+	Gli
chr3R	11925564	11926064	501	*	1.64	0.69	2.21	-1.52	0.245	1	2	2	2.79	1.25	0.81	3.9	0.97	9	+	+	-	+	-	+	Cad87A
chrUn_DS485453v1	130	630	501	*	0.18	-0.64	0.71	-1.35	0.246	1	3	2	0.7	0.42	0.81	0.97	2.92	1	+	+	+	-	+	+
chrX	18421284	18421784	501	*	1.54	2.03	0.78	1.26	0.247	1	2	2	4.88	4.99	2.42	0.97	0.16	4	+	+	-	+	-	+	CG42323
chr3L	22331024	22331524	501	*	0.27	0.77	-0.49	1.26	0.247	1	1	3	3.48	0.83	0.81	0.97	0.16	1	+	-	-	+	+	+	Ten-m
chrX	6890131	6890631	501	*	2.21	2.67	1.51	1.16	0.248	1	3	3	9.76	2.91	6.45	2.92	1.62	4	+	+	+	+	+	+
chr3R	22265781	22266281	501	*	0.48	-0.64	1.1	-1.75	0.248	1	1	1	0.7	0.42	0.81	1.95	0.49	4	+	-	-	-	-	+	SKIP
chr2L	3921258	3921758	501	*	0.33	0.85	-0.49	1.34	0.248	1	1	3	4.18	0.42	0.81	0.97	0.16	1	+	-	-	+	+	+	fred
chrX	5213058	5213558	501	*	0.33	0.85	-0.49	1.34	0.248	1	2	3	4.18	0.42	0.81	0.97	0.16	1	+	-	+	+	+	+	CG15465
chrX	18224697	18225197	501	*	0.33	0.85	-0.49	1.34	0.248	1	1	2	4.18	0.42	0.81	0.97	0.16	1	+	-	-	+	-	+	CG33639
chr3L	4960345	4960845	501	*	2.14	2.69	1.22	1.47	0.25	1	2	2	7.67	0.42	11.29	5.85	0.16	1	+	-	+	+	-	+	Con
chr2R	21842922	21843422	501	*	2.14	2.69	1.23	1.46	0.25	1	2	0	2.79	0.42	16.13	2.92	2.11	2	+	-	+	-	-	-	FBgn0050407
chr2R	23584298	23584798	501	*	1.32	1.85	0.46	1.39	0.252	1	2	3	5.58	0.42	4.84	0.97	0.16	3	+	-	+	+	+	+	apt
chr3L	27651783	27652283	501	*	1.8	2.36	0.84	1.52	0.253	1	2	0	4.88	2.49	8.07	0.97	3.41	1	+	-	+	-	-	-
chr3R	12712142	12712642	501	*	1.77	0.99	2.27	-1.28	0.255	1	0	2	0.7	1.25	4.03	3.9	9.58	1	-	-	-	-	+	+	mus308
chrX	4736968	4737468	501	*	0.18	0.64	-0.49	1.13	0.255	1	1	1	1.39	1.66	1.61	0.97	0.16	1	+	-	-	-	-	+
chrX_DS483923v1_random	1070	1570	501	*	0.18	0.64	-0.49	1.13	0.255	1	3	1	1.39	1.66	1.61	0.97	0.16	1	+	+	+	-	+	-
chrX	11266253	11266753	501	*	1.88	2.41	1.02	1.39	0.256	1	3	3	9.06	0.42	6.45	2.92	0.16	3	+	+	+	+	+	+	CG44422
chr2R	20948157	20948657	501	*	0.22	-0.64	0.75	-1.4	0.258	1	1	1	0.7	0.42	0.81	1.95	2.11	1	+	-	-	-	+	-	CG33704
chrX	725550	726050	501	*	1.06	1.56	0.27	1.29	0.259	1	2	0	0.7	3.33	4.84	0.97	0.65	2	+	-	+	-	-	-	sdk
chrY	63643	64493	851	*	0.33	0.81	-0.38	1.19	0.259	1	1	2	0.7	3.74	0.81	0.97	0.32	1	+	-	-	+	-	+	kl-5
chr3R	24605393	24605893	501	*	0.8	-0.36	1.44	-1.8	0.259	1	3	1	0.7	0.83	0.81	0.97	0.16	7	+	+	+	-	-	+	mld
chrX	20481533	20482033	501	*	2.16	1.33	2.68	-1.35	0.259	1	2	3	0.7	0.42	6.45	5.85	2.44	11	+	-	+	+	+	+	RhoGAP19D
chrX	4348990	4349490	501	*	1.77	2.31	0.89	1.42	0.26	1	2	2	5.58	0.42	8.87	2.92	1.62	1	+	-	+	+	-	+	norpA
chrX	9100002	9100502	501	*	0.38	-0.64	0.97	-1.61	0.26	1	1	1	0.7	0.42	0.81	3.9	0.97	1	+	-	-	+	-	-	CG7766
chr3L	20086012	20086512	501	*	1.16	1.63	0.45	1.18	0.262	1	2	1	2.79	2.49	4.03	1.95	0.16	2	+	-	+	+	-	-	sNPF-R
chrX	3000294	3000794	501	*	2.22	2.65	1.59	1.06	0.265	1	2	0	6.97	7.07	4.84	2.92	2.11	4	+	+	-	-	-	-	kirre
chr3R	2720692	2721192	501	*	0.79	1.27	0.06	1.2	0.265	1	1	3	0.7	2.49	4.03	0.97	0.16	2	+	-	-	+	+	+	FBgn0267430
chrX	12811183	12811683	501	*	0.16	0.6	-0.49	1.09	0.266	1	1	2	2.09	1.66	0.81	0.97	0.16	1	+	-	-	+	-	+	Pde9
chrX_DS484099v1_random	-38	462	501	*	0.16	0.6	-0.49	1.09	0.266	1	2	1	2.09	1.66	0.81	0.97	0.16	1	+	+	-	-	+	-
chrUn_CP007085v1	44396	44896	501	*	0.99	1.5	0.21	1.29	0.266	1	1	2	2.79	0.83	4.84	0.97	0.49	2	+	-	-	+	-	+
chr3R	9317994	9318494	501	*	0.94	1.48	0.06	1.42	0.267	1	2	2	0.7	0.42	7.26	0.97	0.16	2	+	-	+	-	+	+	CG8861
chrX	17535729	17536229	501	*	1.34	0.6	1.82	-1.23	0.267	1	3	3	2.09	0.83	1.61	3.9	4.71	2	+	+	+	+	+	+	CG43658
chrX	2822218	2822718	501	*	1.64	2.17	0.8	1.37	0.269	1	0	2	4.18	0.42	8.87	3.9	0.32	1	-	-	-	+	-	+	kirre
chr2R	13367910	13368410	501	*	1.05	1.61	0.13	1.48	0.271	1	2	0	3.48	0.83	4.84	0.97	1.3	1	+	-	+	-	-	-
chr2L	3335066	3335566	501	*	0.44	-0.64	1.05	-1.7	0.273	1	1	1	0.7	0.42	0.81	3.9	0.32	2	+	-	-	-	-	+	E23
chrX	6932777	6933277	501	*	0.62	1.17	-0.29	1.46	0.273	1	2	1	0.7	0.42	5.65	0.97	0.49	1	+	-	+	-	-	+	CG14431
chr3L	4430190	4430690	501	*	1.42	0.42	2.01	-1.59	0.274	1	1	2	2.79	0.42	0.81	3.9	0.16	8	+	-	-	+	-	+	nAChRbeta1
chr2R	22338492	22338992	501	*	1.16	0.14	1.75	-1.6	0.275	1	1	2	2.09	0.42	0.81	3.9	0.16	6	+	-	-	+	-	+	Liprin-gamma
chr2R	13622027	13622527	501	*	0.45	-0.64	1.07	-1.71	0.275	1	1	1	0.7	0.42	0.81	0.97	0.32	5	+	-	-	-	-	+	CG17716
chr3L	12312215	12312715	501	*	1.34	1.89	0.45	1.43	0.275	1	1	1	9.06	0.42	1.61	0.97	1.14	2	+	-	-	-	-	+
chrX	1937675	1938175	501	*	0.36	-0.64	0.94	-1.59	0.276	1	2	2	0.7	0.42	0.81	1.95	0.81	3	+	-	+	+	+	-	CG3857
chr2L	19620079	19620579	501	*	0.24	0.72	-0.49	1.2	0.278	1	2	1	2.09	0.42	2.42	0.97	0.16	1	+	-	+	-	+	-	Lar
chrX	23455961	23456909	949	*	0.24	0.72	-0.49	1.2	0.278	1	2	1	2.09	0.42	2.42	0.97	0.16	1	+	+	-	-	+	-
chrX	17445430	17445930	501	*	2.09	2.62	1.25	1.37	0.278	1	2	0	8.36	0.42	9.68	0.97	0.16	6	+	-	+	-	-	-	CG12994
chrX	12268824	12269324	501	*	1.92	2.46	1.07	1.39	0.282	1	2	1	0.7	1.25	14.52	0.97	0.32	5	+	-	+	+	-	-	Ten-a
chr3L	10578777	10579277	501	*	0.28	0.78	-0.49	1.27	0.284	1	2	1	0.7	0.42	4.03	0.97	0.16	1	+	-	+	+	-	-	Rbfox1
chr3L	23378183	23378683	501	*	0.28	0.78	-0.49	1.27	0.284	1	2	2	0.7	0.42	4.03	0.97	0.16	1	+	-	+	-	+	+
chr3R	24433745	24434245	501	*	0.28	0.78	-0.49	1.27	0.284	1	1	1	0.7	0.42	4.03	0.97	0.16	1	+	-	-	+	-	-	nAChRalpha1
chrX	10151731	10152231	501	*	0.28	0.78	-0.49	1.27	0.284	1	1	2	0.7	0.42	4.03	0.97	0.16	1	+	-	-	+	-	+	CG12645
chr3R	29401509	29402009	501	*	1.51	1.97	0.81	1.16	0.284	1	1	1	2.79	4.16	4.84	0.97	1.3	3	+	-	-	-	-	+	Ptp99A
chr3R	14735674	14736174	501	*	1.94	0.96	2.51	-1.55	0.286	1	1	2	1.39	0.42	4.03	0.97	0.16	16	+	-	-	+	-	+	eff
chr3L	20324557	20325057	501	*	1.67	0.75	2.22	-1.48	0.286	1	1	2	1.39	0.42	3.23	5.85	0.16	8	+	-	-	+	-	+	FBgn0036972
chrX	5783274	5783774	501	*	1.16	1.63	0.45	1.19	0.287	1	1	1	5.58	2.91	0.81	2.92	0.16	1	+	-	-	+	-	-	CG3108
chr3R	11298465	11298965	501	*	1.19	1.67	0.45	1.23	0.288	1	1	2	4.18	4.57	0.81	1.95	1.14	1	+	-	-	+	-	+	FBgn0051386
chr3R	20358567	20359067	501	*	1.39	1.96	0.45	1.51	0.288	1	2	1	0.7	2.08	8.87	0.97	2.11	1	+	+	-	-	-	+	MtnC
chrX	7842025	7842525	501	*	1.51	1.99	0.78	1.22	0.288	1	2	2	6.97	4.16	0.81	0.97	0.16	4	+	+	-	+	-	+	CARPA
chrX_DS483946v1_random	1137	1637	501	*	1.48	1.94	0.8	1.14	0.289	1	3	1	4.18	2.49	4.84	3.9	0.32	1	+	+	+	-	+	-
chr3R	19315549	19316049	501	*	0.5	-0.2	0.97	-1.17	0.29	1	1	3	1.39	0.42	0.81	0.97	3.9	1	+	-	-	+	+	+	Dl
chr2L	3439885	3440385	501	*	2.1	2.6	1.31	1.29	0.292	1	0	2	4.88	0.42	12.91	0.97	1.46	5	-	-	-	+	-	+
chr2R	23666676	23667176	501	*	1.26	1.82	0.33	1.5	0.292	1	2	0	6.97	0.42	3.23	0.97	1.79	1	+	-	+	-	-	-	Pde8
chrX_DS483809v1_random	3343	3843	501	*	0.2	0.66	-0.49	1.15	0.292	1	2	1	0.7	0.83	3.23	0.97	0.16	1	+	+	-	-	+	-
chrX_DS484450v1_random	-90	410	501	*	0.88	0.08	1.39	-1.31	0.292	1	0	2	0.7	1.66	0.81	0.97	3.9	3	-	-	-	-	+	+
chrX	10802791	10803291	501	*	1.98	1.23	2.47	-1.23	0.293	1	3	3	2.09	4.16	0.81	5.85	9.74	1	+	+	+	+	+	+	Imp
chr2R	22047060	22047560	501	*	2.27	1.38	2.81	-1.43	0.293	1	3	3	4.18	0.42	3.23	4.87	0.16	16	+	+	+	+	+	+
chr2R	4239747	4240247	501	*	0.54	1.02	-0.19	1.21	0.294	1	1	3	0.7	4.57	0.81	0.97	0.65	1	+	-	-	+	+	+	IntS3
chr3R	29843684	29844184	501	*	1.14	1.7	0.2	1.51	0.294	1	2	0	2.09	0.42	7.26	0.97	1.46	1	+	-	+	-	-	-	Cad99C
chrUn_DS484467v1	1241	1741	501	*	1.62	2.09	0.93	1.16	0.295	1	2	3	6.97	4.99	0.81	3.9	0.81	1	+	+	-	+	+	+
chrX	16507757	16508257	501	*	0.79	1.27	0.06	1.21	0.295	1	1	1	2.79	0.42	4.03	0.97	0.16	2	+	-	-	+	-	-	para
chrX	14084714	14085214	501	*	1.51	0.65	2.04	-1.39	0.297	1	1	1	3.48	0.42	0.81	9.75	1.62	1	+	-	-	+	-	-
chr3R	2480552	2481052	501	*	0.76	1.29	-0.11	1.4	0.298	1	1	1	2.09	0.42	4.84	0.97	0.81	1	-	-	+	-	+	-	Myo81F
chrX	18186483	18186983	501	*	1.56	2.07	0.75	1.32	0.299	1	3	3	9.76	0.42	2.42	3.9	0.16	1	+	+	+	+	+	+	Frq2
chrX	19100528	19101028	501	*	0.53	1.01	-0.19	1.2	0.3	1	1	2	0.7	2.91	2.42	0.97	0.65	1	+	-	-	+	-	+
chr2R	20492026	20492526	501	*	0.41	-0.64	1.01	-1.66	0.3	1	2	3	0.7	0.42	0.81	3.9	0.16	2	+	+	-	+	+	+	FBgn0265854
chrX	19805592	19806092	501	*	0.41	-0.64	1.01	-1.66	0.3	1	2	1	0.7	0.42	0.81	3.9	0.16	2	+	-	+	-	+	-
chrX	11180426	11180926	501	*	0.51	1.02	-0.29	1.31	0.3	1	3	3	4.88	0.42	0.81	0.97	0.49	1	+	+	+	+	+	+	CG15200
chr3L	15624490	15624990	501	*	1.76	0.81	2.33	-1.52	0.301	1	1	1	0.7	3.74	0.81	9.75	0.32	5	+	-	-	-	-	+	comm3
chrX	16522822	16523322	501	*	2.22	1.38	2.74	-1.36	0.301	1	3	3	4.18	0.42	3.23	0.97	1.14	18	+	+	+	+	+	+	Cnx14D
chr3R	29507071	29507571	501	*	0.67	1.1	0.05	1.05	0.301	1	2	1	0.7	3.33	2.42	1.95	0.16	1	+	+	-	-	-	+
chr2L	4667913	4668413	501	*	0.43	-0.64	1.03	-1.68	0.302	1	0	2	0.7	0.42	0.81	0.97	0.16	5	-	-	-	-	+	+
chrX	16986506	16987006	501	*	0.43	-0.64	1.03	-1.68	0.302	1	1	2	0.7	0.42	0.81	0.97	0.16	5	+	-	-	+	-	+	CG45002
chrX	18958231	18958731	501	*	0.43	-0.64	1.03	-1.68	0.302	1	0	2	0.7	0.42	0.81	0.97	0.16	5	-	-	-	-	+	+	CG43759
chr2L	6851451	6851951	501	*	1.66	2.12	0.97	1.15	0.303	1	1	1	7.67	4.57	0.81	3.9	0.97	1	+	-	-	+	-	-	Rca1
chrUn_CP007085v1	39631	40131	501	*	0.19	0.65	-0.49	1.14	0.303	1	3	2	3.48	0.42	0.81	0.97	0.16	1	+	+	+	+	-	+
chrUn_DS483841v1	4038	4538	501	*	0.19	0.65	-0.49	1.14	0.303	1	1	3	3.48	0.42	0.81	0.97	0.16	1	-	-	+	+	+	+
chrX	8608059	8608559	501	*	1.58	0.79	2.08	-1.29	0.304	1	1	2	0.7	2.08	2.42	8.77	2.92	1	+	-	-	+	+	-	Caf1-180
chr2R	10706257	10706757	501	*	0.76	1.23	0.05	1.17	0.304	1	1	1	4.18	0.42	2.42	1.95	0.16	1	+	-	-	-	-	+	stan
chr2R	15786365	15786865	501	*	1.07	0.14	1.63	-1.49	0.305	1	3	3	2.09	0.42	0.81	7.8	0.49	1	+	+	+	+	+	+	Zasp52
chr2R	22217336	22217836	501	*	0.13	0.56	-0.49	1.05	0.306	1	2	1	2.79	0.83	0.81	0.97	0.16	1	+	-	+	-	-	+	CG30278
chr2L	354965	355465	501	*	0.41	-0.64	1.01	-1.65	0.306	1	0	2	0.7	0.42	0.81	4.87	0.16	1	-	-	-	-	+	+	Plc21C
chrUn_CP007082v1	17447	17947	501	*	0.41	-0.64	1.01	-1.65	0.306	1	0	2	0.7	0.42	0.81	4.87	0.16	1	-	-	-	+	+	-
chr2L	10042325	10042825	501	*	1.73	2.21	1.01	1.2	0.307	1	1	1	6.97	1.25	5.65	4.87	0.16	1	+	-	-	+	-	-
chr2R	17316201	17316701	501	*	0.42	0.9	-0.29	1.18	0.309	1	1	2	0.7	1.66	3.23	0.97	0.49	1	+	-	-	+	-	+	mbl
chr2L	7932491	7932991	501	*	1.45	0.5	2.02	-1.51	0.31	1	2	3	1.39	1.25	1.61	0.97	0.16	11	+	+	-	+	+	+	Snoo
chr2L	10947767	10948267	501	*	2.09	1.27	2.61	-1.35	0.312	1	3	3	5.58	0.83	0.81	5.85	0.49	12	+	+	+	+	+	+	dpr2
chr2L	14618681	14619181	501	*	0.23	-0.64	0.77	-1.41	0.312	1	2	1	0.7	0.42	0.81	0.97	1.14	3	+	+	-	-	-	+	FBgn0000055
chr2R	19819856	19820356	501	*	1.2	1.69	0.46	1.22	0.313	1	1	1	2.79	0.42	6.45	0.97	0.16	3	+	-	-	-	-	+
chrX	19397818	19398318	501	*	1.05	0.08	1.62	-1.55	0.313	1	1	1	0.7	1.66	0.81	2.92	0.32	6	+	-	-	-	-	+	kek5
chrX	1451306	1451806	501	*	1.88	1.12	2.37	-1.24	0.314	1	1	1	2.09	0.42	4.03	11.7	1.79	2	+	-	-	+	-	-	futsch
chr3R	15457355	15457855	501	*	0.25	0.69	-0.38	1.07	0.314	1	2	1	2.79	1.25	0.81	0.97	0.32	1	+	-	+	-	-	+	FBgn0038341
chr2L	4245829	4246329	501	*	2.03	2.47	1.38	1.09	0.314	1	2	1	4.88	2.91	8.87	4.87	1.95	1	+	-	+	-	+	-	FBgn0264868
chrX	4759230	4759730	501	*	1.6	0.72	2.15	-1.43	0.315	1	1	3	2.09	0.42	2.42	0.97	0.32	12	+	-	-	+	+	+
chrX	2905296	2905796	501	*	0.03	0.41	-0.49	0.9	0.317	1	1	1	0.7	2.49	0.81	0.97	0.16	1	+	-	-	+	-	-	kirre
chrX	14138897	14139397	501	*	0.03	0.41	-0.49	0.9	0.317	1	3	1	0.7	2.49	0.81	0.97	0.16	1	+	+	+	-	-	+	FBgn0265869
[truncated: 1,427 more rows]

## Sheet: ZLD in MTD vs clampi 2-4hr
seqnames	start	end	width	strand	Conc	Conc_CLAMPi	Conc_MTD	Fold	p.value	FDR	Called1	Called2	CLRNAi_2.4hr_1	CLRNAi_2.4hr_2	CLRNAi_2.4hr_3	MTD_2.4hr_1	MTD_2.4hr_2	MTD_2.4hr_3	CLRNAi_2.4hr_1.1	CLRNAi_2.4hr_2.1	CLRNAi_2.4hr_3.1	MTD_2.4hr_1.1	MTD_2.4hr_2.1	MTD_2.4hr_3.1	anno_MTD_CLAMPi1_all_gene
chr3R	30912275	30912775	501	*	5.5	2.43	6.41	-3.98	3e-18	1.53e-14	0	3	7	0.67	8.47	85.67	85.24	84.41	-	-	-	+	+	+	Ptx1
chr3R	16886399	16886899	501	*	5.29	2.65	6.17	-3.52	4.09e-17	1.04e-13	0	3	9	3.33	6.48	70.02	77.7	67.97	-	-	-	+	+	+	FBgn0264857
chrX	17789427	17789927	501	*	5.69	3.24	6.55	-3.31	7.59e-16	1.03e-12	0	3	8	5.34	14.94	84.78	116.17	79.74	-	-	-	+	+	+	OdsH
chr3R	4835224	4835724	501	*	5.12	2.2	6.02	-3.82	9.05e-16	1.03e-12	0	3	7	5.34	1.49	53.91	73.17	67.77	-	-	-	+	+	+
chr2L	21543031	21543923	893	*	5.5	3.41	6.32	-2.9	1.02e-15	1.03e-12	1	3	11	10	10.96	75.38	89.77	74.06	-	+	-	+	+	+	FBgn0051614
chrX	4424951	4425451	501	*	5.43	3.07	6.29	-3.22	1.78e-15	1.51e-12	0	3	6	8.67	10.46	58.61	84.49	90.9	-	-	-	+	+	+	bi
chr2L	1972631	1973131	501	*	6.05	4.25	6.83	-2.58	6.01e-15	4.37e-12	0	3	20	14.67	22.42	106.92	126.73	108.15	-	-	-	+	+	+	erm
chr2L	2454581	2455081	501	*	5.36	3.3	6.18	-2.88	2.14e-14	1.36e-11	0	3	14	8.67	6.97	78.29	71.66	67.57	-	-	-	+	+	+	dpp
chr2R	8030759	8031259	501	*	5.56	3.42	6.38	-2.96	7.12e-14	4.03e-11	0	3	6	10.67	15.44	67.33	83.73	99.02	-	-	-	+	+	+	Optix
chrX	17768053	17768553	501	*	5.22	2.97	6.05	-3.09	2.24e-13	1.14e-10	0	3	6	6	11.46	57.94	79.21	62.29	-	-	-	+	+	+	unc-4
chr2R	8018714	8019214	501	*	5.54	3.6	6.34	-2.73	3.63e-13	1.6e-10	0	3	15	12	9.46	59.28	100.71	82.38	-	-	-	+	+	+	FBgn0266805
chrX	8650642	8651142	501	*	6.12	4.35	6.89	-2.54	3.77e-13	1.6e-10	0	3	12	27.34	21.92	103.12	125.22	127.83	-	-	-	+	+	+	oc
chrX	4411292	4411792	501	*	6.06	4.36	6.82	-2.46	4.84e-13	1.9e-10	1	3	17	23.34	21.42	85.9	126.35	127.42	-	-	+	+	+	+	bi
chr3L	9019165	9019665	501	*	5.9	4	6.69	-2.68	5.48e-13	1.99e-10	1	3	8	18.67	21.42	86.12	118.43	104.7	-	-	+	+	+	+	Doc2
chr3R	16763862	16764362	501	*	6.63	5.14	7.35	-2.21	8.48e-13	2.88e-10	2	3	32	37.35	36.36	148.75	165.2	174.3	-	+	+	+	+	+	FBgn0020556
chr2R	25061568	25062068	501	*	4.67	1.53	5.59	-4.06	1.05e-12	2.97e-10	0	3	3	0.67	4.98	46.98	54.31	43.02	-	-	-	+	+	+	gsb
chr2R	25258175	25258675	501	*	6.63	4.66	7.43	-2.77	1.05e-12	2.97e-10	3	3	15	30.68	30.39	116.54	234.6	166.59	+	+	+	+	+	+	CG9380
chr2R	20960895	20961395	501	*	6.87	5.27	7.61	-2.34	1.09e-12	2.97e-10	2	3	40	46.68	28.89	184.77	213.86	185.66	-	+	+	+	+	+	hbn
chr3R	6791422	6791922	501	*	6.01	4.16	6.79	-2.63	1.11e-12	2.97e-10	1	3	18	9.34	26.4	108.27	109.38	115.25	-	-	+	+	+	+	Dfd
chr2R	11475349	11475849	501	*	5.09	2.91	5.92	-3.02	1.3e-12	3.31e-10	0	3	6	10	6.48	48.99	73.93	58.84	-	-	-	+	+	+	inv
chrX	4423733	4424233	501	*	5.85	4.04	6.62	-2.58	1.84e-12	4.45e-10	0	3	12	22.01	15.44	76.28	126.73	92.52	-	-	-	+	+	+	bi
chr2R	11529397	11529897	501	*	5.7	3.92	6.48	-2.56	4.8e-12	1.11e-09	0	3	15	13.34	16.94	60.4	112.02	94.76	-	-	-	+	+	+	en
chr2L	1954423	1954923	501	*	4.72	-0.47	5.7	-6.17	6e-12	1.33e-09	0	3	1	0.67	0.5	49.21	60.35	46.67	-	-	-	+	+	+	erm
chr3R	6991852	6992352	501	*	4.82	2.15	5.7	-3.55	7.88e-12	1.65e-09	0	3	1	5.34	6.97	40.04	56.2	59.45	-	-	-	+	+	+	Antp
chr2L	22024405	22024905	501	*	4.95	2.61	5.8	-3.19	8.09e-12	1.65e-09	0	3	2	9.34	6.97	46.98	58.08	62.09	-	-	-	+	+	+	tio
chr2L	5403474	5403974	501	*	6.29	4.73	7.03	-2.29	1.08e-11	2.12e-09	1	3	21	23.34	35.37	109.16	138.05	143.66	-	-	+	+	+	+	H15
chrX	5560437	5560937	501	*	4.64	-0.47	5.62	-6.09	1.27e-11	2.4e-09	0	3	1	0.67	0.5	45.86	56.2	45.86	-	-	-	+	+	+	Vsx2
chr2R	12884270	12884770	501	*	5.25	3.3	6.05	-2.75	1.52e-11	2.76e-09	0	3	6	8.67	14.94	58.38	74.3	66.55	-	-	-	+	+	+	vg
chr2R	16514789	16515289	501	*	5.24	3.24	6.04	-2.81	1.77e-11	3.02e-09	0	3	8	13.34	6.97	53.46	88.64	55.8	-	-	-	+	+	+	Sema2a
chr3R	13877086	13877586	501	*	4.43	1.38	5.34	-3.96	1.78e-11	3.02e-09	0	3	3	3.33	1.49	32.44	43	46.47	-	-	-	+	+	+	E5
chr2L	5461042	5461542	501	*	6.32	4.3	7.13	-2.83	2.22e-11	3.65e-09	1	3	6	20.67	32.38	116.32	163.32	141.02	-	-	+	+	+	+	mid
chr2L	594660	595160	501	*	4.94	2.54	5.79	-3.25	2.41e-11	3.84e-09	0	3	1	8	8.47	46.08	59.97	60.06	-	-	-	+	+	+	Gsc
chr2L	1970361	1970861	501	*	4.79	2.4	5.64	-3.25	3.44e-11	5.31e-09	0	3	2	7.34	6.48	40.71	50.54	58.84	-	-	-	+	+	+	erm
chr2L	11447549	11448049	501	*	6.73	5.3	7.43	-2.13	3.78e-11	5.67e-09	2	3	39	46.01	33.37	158.82	204.05	154.61	+	-	+	+	+	+	salm
chr3L	377976	378476	501	*	6.09	4.49	6.83	-2.34	7.46e-11	1.09e-08	1	3	12	24.67	30.88	103.12	128.99	109.97	-	-	+	+	+	+	trh
chr3R	8190796	8191296	501	*	6.4	4.89	7.13	-2.24	8.37e-11	1.18e-08	1	3	25	40.01	23.91	114.31	173.12	131.89	-	+	-	+	+	+
chr3R	13901395	13901895	501	*	5.14	3.18	5.94	-2.76	1.22e-10	1.65e-08	0	3	3	12.67	11.46	54.8	62.61	66.76	-	-	-	+	+	+	ems
chrX	4426600	4427100	501	*	6	4.52	6.71	-2.19	1.25e-10	1.65e-08	0	3	18	20.01	30.88	97.08	121.83	95.57	-	-	-	+	+	+	bi
chrX	9693643	9694143	501	*	5.7	4.11	6.44	-2.33	1.26e-10	1.65e-08	0	3	17	11.34	23.41	76.5	105.23	79.34	-	-	-	+	+	+	btd
chr3R	30794542	30795042	501	*	5.64	4.07	6.37	-2.3	2.55e-10	3.25e-08	0	3	20	9.34	20.92	69.34	90.9	88.06	-	-	-	+	+	+	wts
chr2L	3539383	3539883	501	*	5.25	3.64	6	-2.36	3.24e-10	4.02e-08	0	3	10	17.34	9.96	59.28	69.78	62.7	-	-	-	+	+	+	drm
chr2R	22686625	22687125	501	*	4.64	1.89	5.53	-3.64	3.41e-10	4.13e-08	0	2	1	2.67	7.47	61.29	33.95	43.62	-	-	-	+	-	+	Ppa
chr3R	16948508	16949008	501	*	5.43	3.69	6.19	-2.51	3.76e-10	4.46e-08	0	3	18	4.67	15.94	65.99	75.06	78.32	-	-	-	+	+	+	Abd-B
chrX	8624710	8625210	501	*	4.63	2.22	5.48	-3.26	5.79e-10	6.7e-08	0	3	2	4	7.97	37.36	43.75	53.16	-	-	-	+	+	+
chr3R	29555975	29556475	501	*	5.6	4.15	6.31	-2.16	8.52e-10	9.65e-08	1	3	13	17.34	22.91	66.44	86	85.63	-	-	+	+	+	+	Dr
chr3R	16702848	16703348	501	*	6.24	4.78	6.94	-2.16	1.02e-09	1.13e-07	0	3	15	31.34	36.36	108.04	132.39	129.05	-	-	-	+	+	+	Ubx
chrX	6855546	6856046	501	*	5.31	3.77	6.04	-2.27	1.07e-09	1.16e-07	0	3	11	16.01	13.95	51	77.7	69.19	-	-	-	+	+	+	CG14434
chr2R	9692470	9692970	501	*	4.8	2.92	5.59	-2.67	1.16e-09	1.23e-07	0	3	12	4.67	5.98	52.12	47.9	44.03	-	-	-	+	+	+	Uba1
chr3L	10858313	10858813	501	*	4.75	2.92	5.53	-2.61	1.18e-09	1.23e-07	1	3	9	6.67	6.97	42.5	47.52	48.29	-	-	+	+	+	+	tna
chr3R	7000709	7001209	501	*	6.21	4.6	6.95	-2.35	1.25e-09	1.27e-07	0	3	16	16.01	40.85	119.23	136.91	115.25	-	-	-	+	+	+	Antp
chr2R	4824114	4824614	501	*	5.36	3.87	6.08	-2.21	1.49e-09	1.49e-07	1	3	10	16.01	17.93	58.16	73.17	71.83	-	-	+	+	+	+	CG17528
chr2L	16422674	16423174	501	*	6.19	4.86	6.87	-2	1.6e-09	1.57e-07	1	3	28	22.01	37.36	101.33	135.78	113.02	-	-	+	+	+	+	CG5888
chrX	17313292	17313792	501	*	4.12	1.15	5.03	-3.88	1.86e-09	1.79e-07	0	3	3	0.67	2.99	28.86	33.57	35.31	-	-	-	+	+	+	B-H2
chr3R	15290616	15291116	501	*	5.14	3.6	5.87	-2.27	1.96e-09	1.85e-07	0	3	12	15.34	8.97	64.65	58.08	52.76	-	-	-	+	+	+	Tm1
chrX	2982315	2982815	501	*	3.99	0.64	4.91	-4.28	3.1e-09	2.86e-07	0	3	3	0.67	1	25.5	33.19	31.65	-	-	-	+	+	+	kirre
chr2R	22685961	22686461	501	*	5.07	3.43	5.82	-2.39	3.15e-09	2.86e-07	0	3	14	5.34	12.95	57.94	54.31	57.02	-	-	-	+	+	+	Ppa
chr2R	19275238	19275738	501	*	5.95	4.48	6.66	-2.18	3.45e-09	3.08e-07	1	3	14	22.67	30.39	80.75	132.01	90.9	-	-	+	+	+	+	rib
chr3R	3789564	3790064	501	*	5.86	4.61	6.52	-1.91	3.55e-09	3.1e-07	2	3	19	24.01	30.39	92.61	90.52	92.52	-	+	+	+	+	+
chrX	2795697	2796197	501	*	6.15	6.79	4.98	1.81	3.59e-09	3.1e-07	3	3	136	98.7	98.13	26.84	36.21	31.65	+	+	+	+	+	+	FBgn0003996
chr3R	17666367	17666867	501	*	4.94	2.87	5.76	-2.89	3.92e-09	3.33e-07	0	3	15	4	2.99	46.53	72.79	43.42	-	-	-	+	+	+	CG14322
chr2R	20836270	20836770	501	*	4.79	3.08	5.56	-2.48	4.66e-09	3.89e-07	0	3	8	9.34	7.97	40.26	48.28	52.55	-	-	-	+	+	+	insc
chr4	989328	989828	501	*	4.68	2.69	5.49	-2.8	5.97e-09	4.91e-07	0	3	5	9.34	4.98	32.66	45.26	56.61	-	-	-	+	+	+	toy
chr3R	6678428	6678928	501	*	5.4	4.06	6.09	-2.03	6.59e-09	5.33e-07	0	3	19	14	16.94	54.13	75.06	75.08	-	-	-	+	+	+	lab
chr3L	21476546	21477046	501	*	5.77	4.49	6.44	-1.94	7.32e-09	5.83e-07	2	3	18	26.68	22.91	72.03	104.1	83.6	+	-	+	+	+	+	croc
chr3R	16715511	16716011	501	*	6.14	4.76	6.83	-2.07	7.86e-09	6.16e-07	2	3	22	20.01	39.35	100.66	140.31	100.03	+	-	+	+	+	+	Ubx
chr3R	16829965	16830465	501	*	5.41	3.43	6.21	-2.77	8.78e-09	6.78e-07	0	3	3	8	21.42	53.01	76.94	91.92	-	-	-	+	+	+	abd-A
chr2R	22241935	22242435	501	*	4.52	2.6	5.31	-2.72	1.05e-08	8.02e-07	0	3	8	6.67	3.49	37.58	40.36	41.39	-	-	-	+	+	+	dve
chr3R	29257898	29258398	501	*	5.63	4.15	6.34	-2.19	1.12e-08	8.42e-07	0	3	27	8	18.43	68	96.18	79.34	-	-	-	+	+	+	stg
chr3L	10849723	10850223	501	*	5	3.14	5.78	-2.64	1.17e-08	8.62e-07	0	3	8	14	4.48	37.36	72.42	55.19	-	-	-	+	+	+	FBgn0266679
chr2R	16828682	16829182	501	*	6.05	4.9	6.68	-1.78	1.2e-08	8.75e-07	2	3	33	23.34	33.37	97.53	111.64	99.02	-	+	+	+	+	+	FBgn0262432
chr3R	8333738	8334238	501	*	4.28	1.85	5.14	-3.29	1.42e-08	1.02e-06	0	2	5	1.33	4.48	29.75	28.67	47.07	-	-	-	+	-	+	Poxm
chr2R	14458134	14458634	501	*	5.04	3.46	5.78	-2.32	1.93e-08	1.36e-06	0	3	13	6	13.95	45.63	65.25	53.77	-	-	-	+	+	+	Oaz
chr2R	4618729	4619229	501	*	5.5	4.2	6.18	-1.98	1.94e-08	1.36e-06	1	3	14	22.67	18.43	59.28	71.66	85.83	-	+	-	+	+	+	CG17486
chr3L	11927231	11927731	501	*	4.89	3.25	5.64	-2.38	1.98e-08	1.36e-06	0	3	6	10.67	11.95	57.04	41.87	50.52	-	-	-	+	+	+	byn
chrX	19545987	19546487	501	*	4.82	2.77	5.63	-2.86	2.07e-08	1.41e-06	0	3	13	6	1.49	35.79	56.58	56.2	-	-	-	+	+	+	CG32532
chr2L	11206844	11207344	501	*	4.59	2.47	5.41	-2.94	2.52e-08	1.69e-06	0	3	1	10.67	4.98	39.59	42.24	46.06	-	-	-	+	+	+	FBgn0264441
chr3R	23279042	23279542	501	*	5.1	3.72	5.79	-2.07	2.6e-08	1.72e-06	0	3	12	14.67	12.95	61.74	55.44	48.9	-	-	-	+	+	+	orb
chr3R	15291468	15292442	975	*	5.2	3.65	5.93	-2.28	3.33e-08	2.16e-06	3	3	21	4.67	11.95	59.95	63.74	58.84	+	+	+	+	+	+	Tm1
chrX	7110817	7111317	501	*	4.18	1.9	5.03	-3.13	3.35e-08	2.16e-06	1	3	5	4.67	1.49	27.74	35.08	34.9	-	-	+	+	+	+	fz4
chr3R	10613072	10613572	501	*	3.83	0.08	4.78	-4.7	3.39e-08	2.16e-06	0	3	1	0.67	1.49	42.05	20.74	19.48	-	-	-	+	+	+	hth
chr3R	30781776	30782276	501	*	5.51	4.07	6.21	-2.14	3.74e-08	2.35e-06	0	3	11	28.01	11.46	72.48	66.01	83.6	-	-	-	+	+	+	zfh1
chr3R	26010503	26011003	501	*	5.83	4.62	6.48	-1.86	4.17e-08	2.58e-06	1	3	15	30.01	28.89	93.95	85.24	88.47	-	-	+	+	+	+	E(spl)malpha-BFM
chr3L	12467957	12468457	501	*	5.1	3.67	5.8	-2.14	4.2e-08	2.58e-06	0	3	11	12.67	14.45	42.28	59.97	65.34	-	-	-	+	+	+	eyg
chrX	16147604	16148104	501	*	4.75	3.04	5.51	-2.47	5.29e-08	3.21e-06	0	3	7	6.67	10.96	34.22	55.07	47.07	-	-	-	+	+	+	disco-r
chr3R	21499363	21499863	501	*	4.35	1.61	5.23	-3.63	5.55e-08	3.33e-06	0	3	1	0.67	7.47	46.98	38.47	27.39	-	-	-	+	+	+	C15
chr4	866866	867366	501	*	5.61	4.34	6.28	-1.94	5.66e-08	3.35e-06	1	3	18	14.67	27.89	63.98	86.37	81.97	-	-	+	+	+	+	Gyf
chr3R	26039985	26040485	501	*	4.92	3.37	5.65	-2.28	6.27e-08	3.67e-06	0	3	7	10.67	13.45	40.26	56.95	53.57	-	-	-	+	+	+	E(spl)m8-HLH
chr3L	12434342	12434842	501	*	4.38	2.46	5.17	-2.72	6.95e-08	4.03e-06	0	3	4	6	6.48	30.65	37.72	39.97	-	-	-	+	+	+	toe
chrX	11578648	11579148	501	*	6.7	7.3	5.64	1.67	7.47e-08	4.23e-06	3	3	194	153.38	126.52	46.75	51.3	51.34	+	+	+	+	+	+	e(y)2
chr3R	16869282	16869782	501	*	5.92	4.65	6.59	-1.94	7.53e-08	4.23e-06	1	3	14	30.01	31.38	75.61	104.1	108.76	-	-	+	+	+	+	FBgn0264857
chr3R	9220373	9220873	501	*	5.86	4.65	6.51	-1.86	7.55e-08	4.23e-06	1	3	15	27.34	32.88	81.2	94.67	97.8	-	+	-	+	+	+	pum
chrX	2123321	2123821	501	*	5.8	4.48	6.48	-2	8.79e-08	4.87e-06	1	3	11	30.01	25.9	75.38	109	82.58	-	-	+	+	+	+	ph-d
chr3L	14600565	14601065	501	*	4.29	2.06	5.13	-3.07	9.64e-08	5.28e-06	0	3	1	6	5.48	26.62	35.45	42.81	-	-	-	+	+	+	HGTX
chr3L	10225938	10226438	501	*	4.12	1.56	4.99	-3.43	1.06e-07	5.76e-06	0	3	7	1.33	0.5	23.71	30.17	41.6	-	-	-	+	+	+	scramb1
chrX	5593775	5594275	501	*	3.65	0.29	4.58	-4.29	1.07e-07	5.76e-06	0	3	1	0.67	1.99	19.68	27.16	24.96	-	-	-	+	+	+	Vsx1
chr2R	13565627	13566127	501	*	5.05	3.49	5.78	-2.29	1.15e-07	6.11e-06	0	3	6	11.34	16.44	42.5	68.27	53.97	-	-	-	+	+	+
chr2L	12011642	12012142	501	*	4	1.25	4.89	-3.63	1.25e-07	6.59e-06	0	3	2	0.67	4.48	19.91	37.72	31.04	-	-	-	+	+	+	FBgn0265799
chr3R	21446329	21446829	501	*	5.43	4.17	6.09	-1.92	1.29e-07	6.69e-06	2	3	12	20.01	21.92	55.48	67.51	81.77	+	-	+	+	+	+	lbe
chr3L	3409790	3410290	501	*	5.06	3.43	5.81	-2.38	1.3e-07	6.69e-06	1	3	7	6	19.43	52.34	56.95	59.05	-	-	+	+	+	+	sty
chr2L	189967	190467	501	*	4.18	1.96	5.02	-3.06	1.33e-07	6.76e-06	0	3	7	0.67	3.98	28.19	36.96	32.26	-	-	-	+	+	+	spen
chr4	313754	314254	501	*	5.2	3.87	5.87	-2	1.35e-07	6.78e-06	1	3	14	10	19.92	55.25	65.25	55.39	+	-	-	+	+	+	Zip102B
chr3L	12609275	12609775	501	*	5.95	4.6	6.64	-2.04	1.36e-07	6.78e-06	0	3	21	12.67	38.85	95.07	88.26	115.05	-	-	-	+	+	+	caup
chr2L	19154819	19155319	501	*	5.45	4.08	6.14	-2.07	1.45e-07	7.18e-06	1	3	7	24.67	18.93	63.3	81.47	67.16	-	+	-	+	+	+	brat
chr2R	15329133	15329633	501	*	3.62	-0.47	4.58	-5.05	1.51e-07	7.38e-06	0	2	1	0.67	0.5	21.25	29.04	21.51	-	-	-	+	+	-	CG8157
chr3L	3845738	3846238	501	*	4.19	1.53	5.08	-3.55	1.52e-07	7.39e-06	0	3	1	0.67	6.97	28.19	39.98	33.07	-	-	-	+	+	+	Awh
chr3R	12280657	12281157	501	*	5.58	4.18	6.28	-2.1	1.55e-07	7.44e-06	1	3	15	10	29.39	62.19	90.14	80.76	-	-	+	+	+	+	svp
chr2R	24813625	24814125	501	*	6.06	5.02	6.66	-1.64	1.68e-07	8e-06	2	3	35	32.01	30.39	90.59	123.34	89.48	+	-	+	+	+	+	Dll
chr2R	7418383	7418883	501	*	6.23	5.19	6.83	-1.64	1.76e-07	8.28e-06	3	3	27	44.68	37.86	118.56	114.66	108.96	+	+	+	+	+	+	so
chr3L	9004797	9005297	501	*	4.46	2.32	5.28	-2.96	1.77e-07	8.28e-06	0	3	1	4	9.96	39.37	35.83	41.6	-	-	-	+	+	+	Doc3
chr4	904607	905107	501	*	4.15	1.96	4.98	-3.02	1.81e-07	8.36e-06	0	3	4	2.67	4.98	24.83	26.78	43.02	-	-	-	+	+	+	unc-13
chrX	12938135	12938635	501	*	4.62	3.1	5.35	-2.24	1.93e-07	8.86e-06	2	3	9	9.34	7.47	38.25	43.37	40.38	+	+	-	+	+	+	fne
chr3L	25108648	25109148	501	*	3.93	1.25	4.81	-3.56	2.07e-07	9.41e-06	0	3	1	2.67	3.49	16.78	31.68	35.91	-	-	-	+	+	+	Set1
chr3R	6845506	6846006	501	*	4.84	3.41	5.55	-2.14	2.11e-07	9.49e-06	0	3	9	11.34	11.46	37.13	51.67	51.74	-	-	-	+	+	+	Scr
chrX	3856892	3857392	501	*	4.32	2.35	5.12	-2.77	2.15e-07	9.59e-06	0	3	3	5.34	6.97	29.3	31.31	43.83	-	-	-	+	+	+	ec
chr2L	7306715	7307215	501	*	6.13	4.94	6.77	-1.83	2.24e-07	9.94e-06	1	3	28	20.67	43.34	94.62	133.9	99.42	-	-	+	+	+	+	wg
chrX	7225964	7226464	501	*	5.23	3.69	5.96	-2.27	2.33e-07	1.02e-05	0	3	5	15.34	18.43	51.45	84.86	50.12	-	-	-	+	+	+	CG9650
chrX	9466583	9467083	501	*	4.19	1.85	5.04	-3.18	2.37e-07	1.03e-05	0	3	5	5.34	0.5	23.04	32.06	43.42	-	-	-	+	+	+	mgl
chr3L	14599434	14599934	501	*	4.15	1.87	4.99	-3.12	2.48e-07	1.07e-05	0	3	1	6	3.98	23.71	30.55	41.19	-	-	-	+	+	+	HGTX
chr2L	11445610	11446110	501	*	6.07	4.81	6.73	-1.91	2.49e-07	1.07e-05	1	3	12	37.35	34.87	106.03	106.36	105.11	-	-	+	+	+	+	salm
chr2L	520974	521474	501	*	3.7	0.47	4.62	-4.14	2.53e-07	1.07e-05	0	3	1	2.67	0.5	17.9	36.59	19.07	-	-	-	+	+	+	ush
chr3L	12734520	12735020	501	*	4.56	2.35	5.4	-3.05	2.98e-07	1.25e-05	0	3	1	3.33	10.96	27.96	51.67	46.67	-	-	-	+	+	+	Ptp69D
chr2L	8825246	8825746	501	*	5.79	4.69	6.41	-1.73	3e-07	1.25e-05	0	3	19	33.34	24.91	97.98	69.78	87.86	-	-	-	+	+	+	SoxN
chr2L	20770345	20770845	501	*	6.25	5.11	6.88	-1.77	3.21e-07	1.33e-05	2	3	22	37.35	44.33	95.74	116.55	142.24	-	+	+	+	+	+	cad
chrX	3452067	3452567	501	*	5	5.66	3.73	1.93	3.28e-07	1.35e-05	3	3	64	53.35	34.37	14.09	13.2	12.58	+	+	+	+	+	+	FBgn0266350
chr2R	4471053	4471553	501	*	5.38	4.19	6.02	-1.82	3.41e-07	1.39e-05	0	3	12	22.01	20.92	56.37	70.15	67.77	-	-	-	+	+	+	Gprk1
chr2L	15111316	15111816	501	*	3.69	0.78	4.59	-3.81	3.57e-07	1.44e-05	0	3	1	0.67	3.49	22.82	25.65	23.94	-	-	-	+	+	+	stc
chr2R	13584548	13585048	501	*	4.92	3.05	5.71	-2.66	3.82e-07	1.52e-05	0	3	2	5.34	17.43	49.21	59.97	47.89	-	-	-	+	+	+	CG6191
chrX	12925452	12925952	501	*	4.84	3.35	5.56	-2.21	3.83e-07	1.52e-05	0	3	8	10.67	11.95	37.58	63.74	40.38	-	-	-	+	+	+	fne
chrX	2124184	2124684	501	*	5.45	4.32	6.08	-1.76	3.98e-07	1.57e-05	1	3	14	26.01	19.92	61.29	69.4	72.03	-	+	-	+	+	+	ph-d
chr3R	7037197	7037697	501	*	5.66	4.39	6.32	-1.92	4.04e-07	1.59e-05	1	3	11	20.67	31.38	65.99	84.11	89.28	-	-	+	+	+	+	FBgn0266238
chr3R	17617525	17618025	501	*	4.88	5.56	3.57	1.99	4.29e-07	1.67e-05	3	0	61	41.35	38.85	8.5	14.33	12.78	+	+	+	-	-	-	FBgn0011944
chrX	16361261	16361761	501	*	5.03	3.73	5.7	-1.97	4.58e-07	1.77e-05	0	3	12	15.34	12.45	40.04	52.05	64.32	-	-	-	+	+	+	nonA
chr2L	21868700	21869200	501	*	4.04	1.94	4.86	-2.92	5.45e-07	2.09e-05	0	3	4	2	5.48	27.74	25.65	33.68	-	-	-	+	+	+	FBgn0266222
chrX	8141682	8142182	501	*	3.92	1.25	4.81	-3.55	5.75e-07	2.18e-05	0	2	1	0.67	5.48	27.07	22.63	34.29	-	-	-	+	-	+	Smox
chr2L	19260253	19260753	501	*	5.57	4.51	6.17	-1.66	5.82e-07	2.18e-05	0	3	21	20.67	26.9	61.52	80.34	74.26	-	-	-	+	+	+	CG31797
chr2L	195766	196266	501	*	3.84	1.32	4.71	-3.38	5.82e-07	2.18e-05	0	3	5	2	0.5	33.11	16.97	28.2	-	-	-	+	+	+	spen
chr3R	24867933	24868433	501	*	4.54	2.86	5.29	-2.43	5.88e-07	2.19e-05	0	2	8	7.34	6.48	37.58	25.27	54.78	-	-	-	+	-	+	CycB3
chr3L	19663600	19664100	501	*	4.58	3.06	5.31	-2.25	6.41e-07	2.37e-05	0	3	6	8	10.96	41.83	38.09	38.96	-	-	-	+	+	+	tey
chr3L	10739280	10739780	501	*	4.67	3.13	5.4	-2.27	6.67e-07	2.45e-05	0	3	5	9.34	11.95	41.61	36.21	48.7	-	-	-	+	+	+
chr3L	21025086	21026025	940	*	4.84	3.42	5.54	-2.12	6.93e-07	2.52e-05	0	3	10	6.67	15.44	46.98	49.41	43.42	-	-	-	+	+	+	skd
chr2L	192110	192610	501	*	3.75	1.04	4.63	-3.59	7.08e-07	2.56e-05	0	2	1	4.67	0.5	26.62	19.99	27.8	-	-	-	+	-	+	spen
chrX	10822044	10822544	501	*	5.15	3.96	5.79	-1.84	7.12e-07	2.56e-05	0	3	15	12.67	18.93	47.2	55.44	63.92	-	-	-	+	+	+	FBgn0267184
chr2L	10239030	10239530	501	*	4.76	2.99	5.53	-2.55	7.3e-07	2.6e-05	0	3	2	7.34	14.45	36.91	45.64	56.41	-	-	-	+	+	+	me31B
chr4	704295	704795	501	*	3.85	1.35	4.72	-3.37	7.75e-07	2.74e-05	0	3	3	0.67	3.98	18.57	36.21	24.35	-	-	-	+	+	+	ey
chrX	23200659	23201159	501	*	3.91	4.7	2.04	2.66	8.52e-07	2.99e-05	2	0	35	16.67	26.4	3.13	4.15	5.07	+	-	+	-	-	-	FBgn0267513
chr3L	14962650	14963150	501	*	4.44	2.27	5.27	-3	8.87e-07	3.09e-05	0	3	1	4	9.46	21.7	48.66	45.05	-	-	-	+	+	+
chrX	19546606	19547106	501	*	4.13	1.76	4.98	-3.22	8.95e-07	3.1e-05	1	3	9	0.67	0.5	31.76	35.45	27.39	+	-	-	+	+	+	CG32532
chr2L	23313392	23313892	501	*	5.4	4.14	6.07	-1.92	9.28e-07	3.2e-05	1	3	10	18.01	24.91	49.21	73.17	78.52	-	-	+	+	+	+	Tim23
chr3L	9040980	9041480	501	*	5.49	4.33	6.12	-1.8	9.35e-07	3.2e-05	1	3	12	19.34	28.89	65.54	73.93	69.8	-	-	+	+	+	+	Doc1
chr2L	12007016	12007516	501	*	4.4	2.43	5.21	-2.78	9.59e-07	3.26e-05	0	2	11	0.67	4.48	35.34	47.15	28.41	-	-	-	+	+	-	Rh5
chr3L	10855375	10855875	501	*	3.79	1.44	4.64	-3.2	9.99e-07	3.37e-05	0	3	6	0.67	1.49	28.19	24.52	22.32	-	-	-	+	+	+	tna
chr2L	22578840	22579340	501	*	4.67	2.98	5.42	-2.45	1.04e-06	3.48e-05	0	3	3	6.67	13.95	37.13	44.88	46.67	-	-	-	+	+	+	Slmap
chrX	16148952	16149452	501	*	5.55	4.1	6.26	-2.16	1.06e-06	3.54e-05	1	3	22	4	25.4	65.77	82.22	81.97	-	-	+	+	+	+	disco-r
chr2L	18703121	18703621	501	*	4.56	3.02	5.29	-2.27	1.08e-06	3.56e-05	0	3	6	9.34	8.97	29.53	47.52	40.38	-	-	-	+	+	+	CG10376
chr2R	1526852	1527352	501	*	5.56	4.4	6.2	-1.8	1.09e-06	3.58e-05	1	3	15	18.01	30.39	60.62	70.53	88.87	-	-	+	+	+	+	Maf1
chr3R	13812563	13813063	501	*	4.91	3.34	5.65	-2.31	1.19e-06	3.88e-05	0	3	4	19.34	6.97	42.95	50.16	57.02	-	-	-	+	+	+	tal-2A
chr3R	21641889	21642389	501	*	5.5	4.35	6.14	-1.79	1.26e-06	4.07e-05	1	3	13	20.67	27.4	54.36	76.94	79.74	-	-	+	+	+	+	E2f1
chrX	590395	590895	501	*	5.58	4.5	6.19	-1.7	1.29e-06	4.15e-05	3	3	17	31.34	19.43	60.62	83.73	75.28	+	+	+	+	+	+	CG13366
chr3L	27083720	27084220	501	*	5.39	4.19	6.03	-1.85	1.39e-06	4.42e-05	0	3	12	20.67	21.92	45.19	72.04	79.13	-	-	-	+	+	+	CG40228
chr2L	3611776	3612276	501	*	3.7	1.38	4.55	-3.16	1.39e-06	4.42e-05	0	3	3	3.33	1.49	18.79	27.91	23.33	-	-	-	+	+	+
chr3R	16811685	16812185	501	*	5.96	4.8	6.6	-1.8	1.46e-06	4.63e-05	1	3	13	34.68	35.86	79.41	110.51	100.24	-	-	+	+	+	+	abd-A
chrX	5579482	5579982	501	*	3.87	1.61	4.71	-3.1	1.62e-06	5.09e-05	0	3	4	0.67	4.48	19.68	27.53	31.45	-	-	-	+	+	+
chr2L	7811275	7811775	501	*	3.93	1.94	4.73	-2.8	1.71e-06	5.34e-05	0	3	4	4	3.49	20.58	33.19	25.97	-	-	-	+	+	+	cdc14
chr2L	8809767	8810267	501	*	5.01	3.86	5.65	-1.79	1.81e-06	5.6e-05	0	3	12	16.01	15.44	55.92	44.88	49.71	-	-	-	+	+	+
chrX	1399562	1400062	501	*	3.3	-0.47	4.25	-4.72	1.82e-06	5.6e-05	0	2	1	0.67	0.5	17.22	19.24	20.49	-	-	-	+	-	+
chr2R	6574994	6575494	501	*	3.63	1.12	4.5	-3.38	1.83e-06	5.6e-05	0	3	2	4	0.5	23.49	24.14	20.09	-	-	-	+	+	+	jing
chr2L	236705	237205	501	*	4.11	2	4.93	-2.93	1.84e-06	5.62e-05	0	3	1	8	2.99	36.24	21.88	33.48	-	-	-	+	+	+	kis
chr2L	3580791	3581291	501	*	4.42	2.69	5.19	-2.5	1.85e-06	5.62e-05	0	3	2	7.34	9.96	35.34	41.49	32.67	-	-	-	+	+	+	sob
chr3L	14003927	14004427	501	*	4.06	1.94	4.88	-2.94	2e-06	6.03e-05	0	2	1	4	6.48	23.26	27.16	37.94	-	-	-	+	-	+	Nprl3
chr2R	22507563	22508063	501	*	6.01	5	6.6	-1.6	2.02e-06	6.06e-05	1	3	34	20.67	41.34	86.79	94.29	110.58	-	-	+	+	+	+	px
chr2L	12003535	12004035	501	*	4.49	3.02	5.2	-2.19	2.13e-06	6.34e-05	0	3	7	7.34	9.96	34.45	42.62	33.48	-	-	-	+	+	+	Hacd1
chrX	19779623	19780123	501	*	3.78	1.26	4.65	-3.4	2.23e-06	6.62e-05	0	2	6	0.67	0.5	34.22	26.02	15.22	-	-	-	+	+	-	zld
chrX	3742200	3742700	501	*	4.76	3.29	5.47	-2.18	2.31e-06	6.8e-05	0	3	7	7.34	14.94	34.67	56.2	42	-	-	-	+	+	+	Tlk
chr2R	12980519	12981019	501	*	6.62	5.68	7.18	-1.5	2.32e-06	6.8e-05	2	3	38	58.69	56.79	130.86	159.54	144.27	-	+	+	+	+	+	Psc
chr2L	3836442	3836942	501	*	5.26	4.16	5.87	-1.71	2.34e-06	6.8e-05	0	3	12	22.67	18.93	51.9	62.99	60.87	-	-	-	+	+	+	slp2
chr2R	4788446	4788946	501	*	4.54	2.92	5.29	-2.37	2.42e-06	7e-05	0	3	5	8.67	8.97	24.16	38.85	54.38	-	-	-	+	+	+	CG12547
chr2R	13621219	13621719	501	*	3.89	1.53	4.75	-3.22	2.43e-06	7e-05	0	3	4	0.67	3.98	17.9	42.62	20.09	-	-	-	+	+	+	CG17716
chr3L	10856395	10856895	501	*	5.36	4.2	5.99	-1.8	2.52e-06	7.22e-05	2	3	11	28.01	15.94	53.69	63.37	74.26	+	+	-	+	+	+	tna
chr2R	4012540	4013040	501	*	4.74	3.32	5.44	-2.12	2.76e-06	7.86e-05	0	3	15	4	10.96	36.69	43	50.93	-	-	-	+	+	+	Haspin
chr2L	16269081	16269581	501	*	4.19	2.26	4.98	-2.73	2.86e-06	8.09e-05	0	3	4	7.34	2.99	19.46	46.39	29.02	-	-	-	+	+	+	crp
chrX	4940554	4941054	501	*	3.64	1.32	4.49	-3.17	2.99e-06	8.42e-05	0	2	1	4	2.49	21.03	24.52	21.71	-	-	-	+	-	+	Ptp4E
chr3R	6741498	6741998	501	*	3.36	0.29	4.27	-3.98	3.02e-06	8.46e-05	0	3	1	0.67	1.99	14.09	19.24	24.55	-	-	-	+	+	+	pb
chr3L	25115732	25116232	501	*	4.97	3.59	5.66	-2.07	3.1e-06	8.62e-05	1	3	6	18.67	11.46	40.49	43.37	68.18	-	-	+	+	+	+	MED21
chr3R	19934822	19935322	501	*	4.45	2.86	5.18	-2.32	3.14e-06	8.7e-05	0	3	5	9.34	7.47	24.38	40.73	43.83	-	-	-	+	+	+	mira
chr2L	12010021	12010521	501	*	4.46	2.67	5.23	-2.56	3.55e-06	9.79e-05	0	3	9	0.67	9.46	34	36.96	41.8	-	-	-	+	+	+
chr2L	19158182	19158682	501	*	5.75	4.78	6.32	-1.54	3.64e-06	9.97e-05	1	3	27	36.01	19.43	71.36	87.5	80.76	-	+	-	+	+	+	brat
chr3R	16899547	16900047	501	*	5.26	4.08	5.9	-1.82	3.66e-06	9.98e-05	1	3	15	12.67	22.91	48.32	79.96	50.32	-	-	+	+	+	+	FBgn0264857
chr3R	16970001	16970501	501	*	4.17	2.38	4.95	-2.56	3.77e-06	0.000102	0	3	5	4.67	5.98	18.57	35.83	38.15	-	-	-	+	+	+	Abd-B
chr2L	22239596	22240096	501	*	4.83	3.58	5.49	-1.91	3.78e-06	0.000102	0	3	9	13.34	13.45	38.92	40.73	54.78	-	-	-	+	+	+	CG3262
chr4	1042081	1042581	501	*	3.29	0.08	4.21	-4.13	3.84e-06	0.000103	0	2	1	0.67	1.49	12.53	20.37	22.52	-	-	-	+	-	+	CaMKII
chr3R	18990914	18991414	501	*	4.87	3.72	5.5	-1.79	3.86e-06	0.000103	0	3	12	14	13.45	50.11	43	43.02	-	-	-	+	+	+	gukh
chrX	18309259	18309759	501	*	6.08	5.09	6.66	-1.57	3.88e-06	0.000103	1	3	25	30.68	46.32	120.57	88.26	93.74	-	-	+	+	+	+	upd1
chr2L	10386282	10386782	501	*	4.6	3.2	5.3	-2.1	4e-06	0.000106	0	3	6	12.67	8.97	32.21	39.6	46.47	-	-	-	+	+	+	Cdk1
chr4	958198	958698	501	*	5.59	4.45	6.21	-1.76	4.03e-06	0.000106	0	3	14	25.34	26.4	50.78	72.04	99.63	-	-	-	+	+	+	4E-T
chrX	7891914	7892414	501	*	4.22	2.4	5	-2.61	4.13e-06	0.000108	0	3	6	1.33	8.47	32.66	28.29	35.31	-	-	-	+	+	+	Nek2
chr4	861760	862260	501	*	3.25	0.08	4.17	-4.09	4.16e-06	0.000108	0	2	2	0.67	0.5	20.36	13.58	19.88	-	-	-	+	-	+	Gyf
chr4	193642	194142	501	*	4.93	3.73	5.57	-1.84	4.22e-06	0.000109	1	3	12	12	15.94	41.83	41.49	59.25	-	-	+	+	+	+	ABCD
chr3L	19895507	19896007	501	*	4.98	3.71	5.65	-1.95	4.27e-06	0.00011	0	3	6	20.67	12.45	50.11	47.15	53.57	-	-	-	+	+	+	Su(Tpl)
chrX	3779034	3779534	501	*	3.3	0.29	4.21	-3.92	4.29e-06	0.00011	0	2	1	0.67	1.99	21.25	15.09	19.07	-	-	-	+	-	+	Tlk
chr3L	6903925	6904425	501	*	4.19	2.19	5	-2.81	4.35e-06	0.000111	0	3	11	0.67	1.99	29.53	38.09	28.2	-	-	-	+	+	+
chr2L	22536491	22536991	501	*	6.23	5.22	6.81	-1.59	4.67e-06	0.000118	2	3	22	43.35	46.82	93.5	121.83	121.34	-	+	+	+	+	+	CG17490
chr3L	21479551	21480051	501	*	5.84	4.91	6.4	-1.5	4.91e-06	0.000124	2	3	23	34.68	32.38	71.13	99.95	82.79	-	+	+	+	+	+
chrX	13994959	13995459	501	*	6.67	5.75	7.23	-1.47	5.03e-06	0.000126	1	3	45	48.02	68.74	130.19	152.76	166.18	-	-	+	+	+	+	ben
chr2R	6594875	6595375	501	*	3.68	1.44	4.52	-3.08	5.1e-06	0.000127	0	3	5	0.67	2.49	16.11	29.8	22.93	-	-	-	+	+	+	jing
chr2L	249032	249532	501	*	4.61	3.3	5.28	-1.98	5.22e-06	0.00013	0	3	9	8.67	11.95	36.69	43.75	36.12	-	-	-	+	+	+	FBgn0265149
chr3L	14177391	14177891	501	*	5.6	4.67	6.16	-1.49	5.49e-06	0.000136	1	3	21	24.01	31.38	66.44	70.15	78.12	-	-	+	+	+	+	D
chr2R	24060086	24060586	501	*	5.02	3.8	5.66	-1.86	5.51e-06	0.000136	0	3	8	14	19.92	44.96	50.16	57.02	-	-	-	+	+	+	ppk29
chr2L	3827361	3828354	994	*	4.04	1.87	4.87	-3	5.61e-06	0.000137	0	3	1	2	7.97	24.38	37.72	25.77	-	-	-	+	+	+
chrX	10822637	10823137	501	*	3.85	1.87	4.66	-2.78	5.64e-06	0.000137	0	2	3	6	1.99	20.36	24.14	31.25	-	-	-	+	-	+	FBgn0267184
chrX	17077257	17077757	501	*	4.79	3.53	5.45	-1.92	5.9e-06	0.000143	1	3	8	10.67	15.94	46.75	46.02	38.55	-	-	+	+	+	+	wcy
chr2L	19156083	19156583	501	*	4.68	3.03	5.43	-2.4	5.97e-06	0.000144	0	3	1	10	13.45	34.67	41.87	52.55	-	-	-	+	+	+	brat
chr2L	5239637	5240137	501	*	4.02	1.83	4.85	-3.02	6.13e-06	0.000147	0	3	2	0.67	7.97	27.29	31.68	27.6	-	-	-	+	+	+	tkv
chr3L	7947783	7948283	501	*	4.11	2.02	4.94	-2.92	6.24e-06	0.000149	0	3	3	0.67	8.47	25.5	37.72	28.61	-	-	-	+	+	+	exex
chrX	6864009	6864509	501	*	3.43	0.78	4.31	-3.52	6.27e-06	0.000149	0	2	2	2.67	0.5	17.45	27.91	14	-	-	-	+	+	-	CG14434
chr3R	8816847	8817347	501	*	4.06	2.02	4.87	-2.85	6.46e-06	0.000153	0	3	1	2.67	8.47	30.42	27.53	29.83	-	-	-	+	+	+	aqz
chr3R	21613316	21613816	501	*	5.28	4.25	5.87	-1.63	6.55e-06	0.000154	0	3	14	26.01	16.94	52.34	64.5	58.84	-	-	-	+	+	+	InR
chr4	660402	660902	501	*	4.93	3.69	5.59	-1.9	6.85e-06	0.000161	0	3	10	11.34	17.43	35.34	48.28	60.87	-	-	-	+	+	+	Slip1
chrX	9692600	9693100	501	*	3.78	1.64	4.6	-2.97	6.87e-06	0.000161	0	2	2	3.33	3.98	15.43	34.7	22.73	-	-	-	+	-	+	btd
chr4	131905	132405	501	*	5.33	4.24	5.94	-1.7	7.42e-06	0.000171	1	3	13	17.34	26.4	48.54	61.86	74.06	-	-	+	+	+	+	Ank
chr2R	24062848	24063348	501	*	4.28	2.7	5.02	-2.32	7.43e-06	0.000171	0	3	4	8	7.47	25.72	29.8	41.8	-	-	-	+	+	+	RpL39
chr2L	23068184	23068684	501	*	4.03	2.2	4.81	-2.6	7.43e-06	0.000171	0	3	3	5.34	5.48	21.7	23.01	39.16	-	-	-	+	+	+	Spf45
chrX	5398564	5399064	501	*	5.22	5.9	3.91	1.99	7.47e-06	0.000171	3	3	101	43.35	34.37	13.65	21.5	9.94	+	+	+	+	+	+	SK
chr3R	8105737	8106237	501	*	3.59	1.35	4.43	-3.08	7.5e-06	0.000171	0	3	1	2.67	3.98	20.58	23.76	20.49	-	-	-	+	+	+	puc
chr2L	9496264	9496764	501	*	4.14	2.47	4.9	-2.42	7.81e-06	0.000176	0	3	4	4.67	7.97	24.38	34.7	30.23	-	-	-	+	+	+	Gdi
chr3R	23201012	23201512	501	*	4.93	3.58	5.62	-2.04	7.81e-06	0.000176	1	3	7	8	20.92	42.05	52.8	52.55	-	-	+	+	+	+	cnc
chr3R	8814264	8814764	501	*	3.27	0.35	4.18	-3.82	7.84e-06	0.000176	0	2	2	1.33	0.5	10.96	18.48	24.75	-	-	-	-	+	+	CG9837
chr2L	18782862	18783362	501	*	4.92	3.78	5.55	-1.77	7.85e-06	0.000176	0	3	17	8.67	15.44	44.74	53.18	42.41	-	-	-	+	+	+	ham
chr3L	11554631	11555131	501	*	3.82	1.73	4.63	-2.9	7.94e-06	0.000178	0	3	1	4	4.98	17.9	27.16	29.42	-	-	-	+	+	+	Mob2
chr2L	15481922	15482422	501	*	3.67	1.58	4.49	-2.91	8.01e-06	0.000178	0	2	2	4	2.99	16.33	24.89	26.17	-	-	-	+	-	+	Tim17b2
chr2R	4671551	4672051	501	*	5.04	3.86	5.68	-1.82	8.07e-06	0.000179	0	3	11	16.01	16.44	35.79	50.16	67.36	-	-	-	+	+	+	CG17883
chr3R	6978181	6978681	501	*	4.38	2.76	5.12	-2.36	8.27e-06	0.000182	0	3	7	5.34	7.97	21.03	52.05	31.25	-	-	-	+	+	+	Antp
chrX	4684339	4684839	501	*	4.89	3.78	5.51	-1.73	8.5e-06	0.000187	1	3	11	14.67	15.44	43.62	42.62	50.52	-	-	+	+	+	+	ctp
chr3L	12653087	12653587	501	*	4.32	2.56	5.09	-2.54	8.75e-06	0.000191	0	3	11	0.67	5.98	26.62	42.62	33.28	-	-	-	+	+	+	FBgn0263379
chr2L	10408027	10408527	501	*	6.19	5.26	6.75	-1.5	8.94e-06	0.000195	2	3	24	42.01	48.82	96.41	106.74	120.73	-	+	+	+	+	+	RpS27A
chr2L	211793	212293	501	*	3.19	0.22	4.09	-3.87	8.98e-06	0.000195	0	2	1	2	0.5	17.22	15.09	18.87	-	-	-	+	+	-	kis
chr3R	4863682	4864182	501	*	4.31	2.61	5.07	-2.46	9.11e-06	0.000197	0	3	5	3.33	9.96	27.74	46.39	26.38	-	-	-	+	+	+	opa
chr2L	10263355	10263855	501	*	5.16	3.97	5.8	-1.83	9.19e-06	0.000197	1	3	8	14	24.91	52.79	60.35	53.77	-	-	+	+	+	+	Rsf1
chrX	12925994	12926494	501	*	4.76	3.58	5.4	-1.82	9.25e-06	0.000198	2	3	15	13.34	7.47	38.92	47.15	40.78	+	-	+	+	+	+	fne
chr3L	1282803	1283303	501	*	7.73	8.36	6.57	1.79	9.53e-06	0.000203	3	3	453	330.11	202.73	115.2	101.46	68.58	+	+	+	+	+	+	CG32333
chr3R	9229413	9229913	501	*	4.74	3.48	5.41	-1.93	9.73e-06	0.000207	0	3	7	12	14.45	34.45	48.66	44.03	-	-	-	+	+	+	pum
chr2L	8545529	8546029	501	*	3.14	-0.17	4.07	-4.24	9.9e-06	0.000209	0	2	1	0.67	1	11.18	16.6	22.52	-	-	-	+	-	+	Sema1a
chr3R	19303519	19304019	501	*	3.33	0.29	4.24	-3.95	9.98e-06	0.00021	0	2	1	0.67	1.99	10.96	31.31	14.41	-	-	-	+	+	-	Dl
chr3L	8665371	8665871	501	*	3.54	1.19	4.39	-3.21	1.02e-05	0.000215	0	2	3	3.33	0.5	12.75	26.4	23.94	-	-	-	-	+	+
chr3L	14132945	14133445	501	*	3.13	0.08	4.04	-3.97	1.09e-05	0.000228	0	3	2	0.67	0.5	12.97	18.48	18.06	-	-	-	+	+	+	Sox21b
chrX	10790818	10791318	501	*	4.02	2.27	4.78	-2.51	1.11e-05	0.000231	0	3	2	6	6.48	30.87	24.14	27.6	-	-	-	+	+	+	Imp
chr3R	16254930	16255430	501	*	5.1	4.05	5.7	-1.66	1.12e-05	0.000232	0	3	17	12.67	19.92	41.38	59.59	55.39	-	-	-	+	+	+	tara
chrX	4686074	4686574	501	*	3.42	1.04	4.27	-3.23	1.12e-05	0.000232	0	3	3	0.67	2.49	17	24.52	16.44	-	-	-	+	+	+	ctp
chr3L	21007595	21008095	501	*	4.48	2.99	5.2	-2.21	1.14e-05	0.000233	0	3	8	3.33	12.45	31.32	38.09	40.58	-	-	-	+	+	+	skd
chr3R	8815286	8815786	501	*	3.86	1.68	4.69	-3.01	1.16e-05	0.000238	0	3	2	0.67	6.97	22.15	28.29	26.99	-	-	-	+	+	+	CG9837
chr2R	21884287	21884787	501	*	3.41	0.87	4.27	-3.4	1.18e-05	0.00024	0	2	1	4	0.5	17	20.37	20.7	-	-	-	+	-	+	PpN58A
chr3R	9808808	9809308	501	*	4.8	3.24	5.53	-2.28	1.2e-05	0.000245	0	3	2	8	18.43	39.82	46.39	52.15	-	-	-	+	+	+	FBXO11
chr2R	22408288	22408788	501	*	4.58	2.83	5.35	-2.52	1.22e-05	0.000247	0	3	1	5.34	14.94	34.67	36.96	50.52	-	-	-	+	+	+	CG6044
chr2R	23045999	23046499	501	*	4.78	3.54	5.43	-1.89	1.25e-05	0.000252	0	2	9	18.01	7.97	48.54	37.34	43.62	-	-	-	+	-	+	twi
chr3L	21471788	21472288	501	*	4.43	2.77	5.18	-2.41	1.33e-05	0.000266	2	3	2	10	8.47	23.93	52.43	32.67	+	+	-	+	+	+
chr3R	10357143	10357643	501	*	4.84	3.72	5.47	-1.75	1.41e-05	0.000281	0	3	15	10	14.45	37.36	53.56	41.6	-	-	-	+	+	+	jumu
chr2L	21847454	21847954	501	*	4.5	3.25	5.16	-1.91	1.42e-05	0.000283	0	3	13	6.67	8.97	36.69	35.45	35.31	-	-	-	+	+	+
chr3R	9872315	9872815	501	*	4.5	2.97	5.22	-2.26	1.45e-05	0.000286	0	3	5	8	10.46	21.7	53.18	37.13	-	-	-	+	+	+	Glut4EF
chr2R	15739884	15740384	501	*	4.22	2.44	4.99	-2.55	1.45e-05	0.000286	0	3	1	5.34	9.96	28.63	29.8	36.93	-	-	-	+	+	+	CG30089
chr2L	4811581	4812081	501	*	5.52	4.65	6.05	-1.4	1.49e-05	0.000293	3	3	23	26.68	25.9	58.61	75.06	65.74	+	+	+	+	+	+	CG15629
chr2R	4187959	4188459	501	*	5.34	4.31	5.93	-1.62	1.51e-05	0.000296	1	3	12	20.01	27.4	56.59	54.69	71.63	-	-	+	+	+	+	RNASEK
chr3R	23343675	23344175	501	*	5.63	4.5	6.26	-1.76	1.52e-05	0.000297	1	3	9	25.34	33.37	59.28	93.92	76.29	-	-	+	+	+	+	pnt
chr3R	16280073	16280573	501	*	4.27	2.49	5.04	-2.55	1.54e-05	0.000299	0	3	1	11.34	4.48	24.38	40.36	34.09	-	-	-	+	+	+	gish
chrX	19775504	19776004	501	*	5.47	4.41	6.08	-1.68	1.57e-05	0.000302	2	3	11	26.68	25.9	48.99	81.47	72.64	+	-	+	+	+	+	zld
chrX	18297886	18298386	501	*	4.46	3.02	5.17	-2.15	1.57e-05	0.000302	2	3	9	3.33	11.95	31.09	38.47	38.15	+	-	+	+	+	+
chr3L	19183960	19184460	501	*	4.71	3.13	5.44	-2.31	1.58e-05	0.000302	1	3	5	3.33	17.93	37.13	47.52	45.65	-	-	+	+	+	+	fz2
chr2L	3662252	3662752	501	*	3.84	1.83	4.65	-2.82	1.58e-05	0.000302	0	2	4	0.67	5.98	27.74	29.04	18.46	-	-	-	+	+	-	Drgx
chr4	501325	501825	501	*	4.65	3.04	5.39	-2.35	1.64e-05	0.000312	0	3	1	14.67	8.97	32.21	57.71	36.12	-	-	-	+	+	+	zfh2
chr3R	16551599	16552099	501	*	3.58	1.15	4.44	-3.29	1.66e-05	0.000316	0	2	1	0.67	4.98	26.62	15.46	22.93	-	-	-	+	-	+	CG42342
chr3L	28012427	28012927	501	*	4.93	3.72	5.58	-1.85	1.67e-05	0.000316	0	3	7	14.67	17.93	38.03	45.26	59.86	-	-	-	+	+	+	CG17514
chr2R	5701798	5702298	501	*	5.27	4.17	5.89	-1.72	1.68e-05	0.000317	1	3	10	18.67	25.4	50.78	50.54	76.5	-	-	+	+	+	+	vlc
chr3L	5654424	5654924	501	*	5	3.8	5.64	-1.84	1.69e-05	0.000317	1	3	10	10	21.92	39.82	58.84	51.34	-	-	+	+	+	+	lin-28
chr2R	22317917	22318417	501	*	5.3	4.21	5.91	-1.7	1.7e-05	0.000318	1	3	22	8	25.4	55.03	59.97	65.54	-	-	+	+	+	+	Gp150
chr3R	28634411	28634911	501	*	4.71	3.49	5.37	-1.88	1.72e-05	0.000321	0	3	12	8.67	12.95	29.97	53.56	40.18	-	-	-	+	+	+	CG10011
chr3L	1364231	1364731	501	*	3.45	1.04	4.31	-3.27	1.74e-05	0.000324	0	3	1	4.67	0.5	19.24	21.5	18.67	-	-	-	+	+	+	Ptp61F
chr3L	2879400	2879900	501	*	6.29	5.48	6.81	-1.33	1.79e-05	0.000331	3	3	38	53.35	42.34	95.96	126.35	114.24	+	+	+	+	+	+	Tet
chr3R	14722196	14722696	501	*	3.04	-0.47	3.98	-4.45	1.8e-05	0.000332	0	2	1	0.67	0.5	13.87	22.25	11.16	-	-	-	+	+	-	kibra
chr3R	30764043	30764543	501	*	5.47	4.47	6.05	-1.58	1.84e-05	0.000339	2	3	11	28.01	27.4	63.08	66.01	69.6	-	+	+	+	+	+	zfh1
chr3L	25120409	25120909	501	*	3.95	1.96	4.76	-2.8	1.85e-05	0.000339	0	3	1	2.67	7.97	20.8	30.17	30.03	-	-	-	+	+	+	UQCR-11
chr2R	12970563	12971063	501	*	3.88	2.19	4.64	-2.45	1.88e-05	0.000344	0	2	5	4.67	3.98	18.12	30.93	25.57	-	-	-	+	-	+	Psc
chr2L	10314515	10315015	501	*	4.72	3.41	5.39	-1.98	1.95e-05	0.000355	0	3	9	6	16.94	34.45	43.75	47.68	-	-	-	+	+	+	Usp14
chrX	12747903	12748403	501	*	5.56	4.65	6.12	-1.47	2e-05	0.000362	0	3	21	29.34	24.91	50.78	78.45	79.34	-	-	-	+	+	+	CG4004
chrX	2140476	2140976	501	*	3.9	1.8	4.73	-2.92	2e-05	0.000362	0	3	1	4	5.48	12.75	39.23	27.39	-	-	-	+	+	+	ph-p
chr3R	8828745	8829245	501	*	4.86	3.66	5.51	-1.85	2.02e-05	0.000363	0	3	12	17.34	8.47	61.74	32.44	42.2	-	-	-	+	+	+	pyd
chr3L	18400058	18400558	501	*	3.75	1.76	4.56	-2.8	2.05e-05	0.000368	0	3	4	0.67	5.48	18.79	27.53	24.35	-	-	-	+	+	+	rpr
chr3R	8181418	8181918	501	*	6.62	5.73	7.17	-1.44	2.06e-05	0.000369	3	3	38	52.02	69.24	120.79	169.35	141.22	+	+	+	+	+	+	grn
chr2R	6573603	6574103	501	*	6	5.02	6.58	-1.55	2.08e-05	0.000371	2	3	17	48.68	31.88	84.11	95.8	106.32	-	+	+	+	+	+	jing
chr3L	14578865	14579365	501	*	5.16	3.68	5.88	-2.2	2.14e-05	0.00038	1	3	3	8	27.4	52.57	54.69	68.99	-	-	+	+	+	+
chr3L	3624694	3625194	501	*	4	2.25	4.76	-2.51	2.16e-05	0.000382	0	3	1	7.34	5.98	27.74	26.4	27.39	-	-	-	+	+	+	dar1
chr3R	9877610	9878110	501	*	4.92	3.81	5.53	-1.72	2.21e-05	0.00039	0	3	18	16.67	7.47	43.4	52.8	42.81	-	-	-	+	+	+	FBgn0266389
chr3R	16677946	16678446	501	*	3.2	0.64	4.07	-3.43	2.24e-05	0.000394	0	2	2	0.67	1.99	18.34	13.58	18.46	-	-	-	+	-	+	Ubx
chr3L	1920871	1921371	501	*	4.51	3.14	5.2	-2.06	2.27e-05	0.000397	0	3	12	8	6.48	31.54	53.56	24.96	-	-	-	+	+	+	Dbx
chr2R	22403328	22403828	501	*	3.49	1.32	4.32	-3	2.27e-05	0.000397	0	2	5	2	0.5	18.57	26.02	15.42	-	-	-	+	+	-	babos
chr2L	16486065	16486565	501	*	5.62	4.79	6.14	-1.35	2.32e-05	0.000403	1	3	27	31.34	24.41	60.4	70.91	80.35	-	+	-	+	+	+	dac
chr3L	1167062	1167562	501	*	4.57	3.25	5.25	-2	2.34e-05	0.000406	0	3	6	8	14.45	32.21	44.88	36.93	-	-	-	+	+	+	bab2
chr3L	14150066	14150566	501	*	5.95	5.01	6.51	-1.51	2.37e-05	0.00041	2	3	17	44.01	35.37	79.19	100.33	94.76	-	+	+	+	+	+
chr2R	11794017	11794517	501	*	5.79	4.9	6.34	-1.44	2.38e-05	0.000411	2	3	19	36.68	33.87	74.04	95.05	74.06	-	+	+	+	+	+	ths
chr2R	18357448	18357948	501	*	5.55	4.66	6.09	-1.44	2.41e-05	0.000414	1	3	26	31.34	18.43	55.25	72.42	77.31	-	+	-	+	+	+	sbb
chr3R	2156658	2157158	501	*	6.2	5.16	6.8	-1.64	2.45e-05	0.000419	1	3	24	56.02	26.9	75.16	113.15	145.08	+	-	-	+	+	+	FBgn0058182
chr2L	4222493	4222993	501	*	3.44	1.04	4.3	-3.26	2.55e-05	0.000434	0	3	1	4.67	0.5	14.32	23.38	21.31	-	-	-	+	+	+	ft
chr2R	11197135	11197635	501	*	4.83	3.72	5.45	-1.73	2.58e-05	0.000438	0	3	8	16.67	14.94	41.38	45.26	44.44	-	-	-	+	+	+	shn
chr4	1051214	1051714	501	*	5.16	4.03	5.79	-1.75	2.59e-05	0.000438	0	3	14	10.67	24.41	45.63	44.88	75.08	-	-	-	+	+	+	CaMKII
chrX	16216720	16217220	501	*	5.04	3.83	5.69	-1.86	2.61e-05	0.000441	1	3	16	5.34	21.42	61.96	47.9	45.05	-	-	+	+	+	+	disco
chr2L	11968784	11969284	501	*	3.47	1.41	4.28	-2.87	2.67e-05	0.000448	0	3	2	4	1.99	18.57	22.25	17.45	-	-	-	+	+	+	FBgn0263019
chrUn_CP007080v1	1741	2241	501	*	3.64	4.41	1.89	2.52	2.69e-05	0.000451	2	0	34	15.34	14.45	4.7	3.39	3.04	+	-	+	-	-	-
chr2L	12520912	12521412	501	*	5.23	4.28	5.8	-1.52	2.85e-05	0.000477	0	3	19	19.34	19.92	40.04	67.51	60.06	-	-	-	+	+	+	bun
chr3R	8927057	8927557	501	*	5.34	4.37	5.91	-1.55	2.89e-05	0.00048	0	3	19	26.01	16.94	48.54	81.09	51.13	-	-	-	+	+	+	pyd
chr3L	8164062	8164562	501	*	4.43	3.09	5.11	-2.03	2.9e-05	0.00048	0	3	5	12	8.47	40.49	35.83	27.39	-	-	-	+	+	+	CG13675
chr3R	16923494	16923994	501	*	4.01	2.41	4.75	-2.34	2.91e-05	0.00048	0	3	7	2	6.97	23.93	29.04	28	-	-	-	+	+	+	FBgn0264857
chr2L	192890	193390	501	*	3.99	2.22	4.76	-2.54	2.91e-05	0.00048	0	2	5	8	1	30.42	21.5	29.42	-	-	-	+	-	+	spen
chr2L	6536049	6536549	501	*	3.95	2.4	4.68	-2.28	2.94e-05	0.000483	0	2	4	7.34	4.48	25.05	25.65	26.38	-	-	-	+	-	+	eya
chr3R	21611686	21612186	501	*	4.58	3.33	5.24	-1.91	2.99e-05	0.000489	0	2	6	14.67	9.46	39.59	30.55	43.42	-	-	-	+	-	+	InR
chrUn_DS484267v1	1915	2415	501	*	5.96	6.61	4.74	1.86	3.04e-05	0.000496	3	2	167	83.36	42.34	19.91	40.36	20.09	+	+	+	-	+	+
chr2R	5293677	5294177	501	*	5	3.9	5.62	-1.71	3.05e-05	0.000497	0	3	15	12	17.93	31.99	52.8	62.7	-	-	-	+	+	+	d4
chr3L	13211281	13211781	501	*	4.55	5.21	3.28	1.93	3.12e-05	0.000507	3	0	57	28.01	26.4	12.08	10.18	6.9	+	+	+	-	-	-	FBgn0052126
chr2R	19276652	19277152	501	*	3.58	1.44	4.41	-2.96	3.14e-05	0.000508	0	2	5	2.67	0.5	11.41	27.53	24.75	-	-	-	-	+	+	rib
chr3L	12081684	12082184	501	*	5.71	4.7	6.29	-1.59	3.2e-05	0.000515	2	3	13	31.34	33.87	58.83	96.18	80.15	-	+	+	+	+	+	Sema5c
chr3R	28585359	28585859	501	*	4.82	3.69	5.44	-1.75	3.21e-05	0.000515	0	3	11	17.34	10.46	48.76	49.79	31.86	-	-	-	+	+	+	fkh
chr2R	5306955	5307455	501	*	4.47	2.79	5.22	-2.43	3.22e-05	0.000516	0	3	1	5.34	14.45	30.42	41.49	40.18	-	-	-	+	+	+	sxc
chr3L	27266923	27267423	501	*	6.08	5	6.69	-1.69	3.25e-05	0.00052	2	3	14	27.34	54.79	93.73	102.21	113.63	-	+	+	+	+	+	RpL15
chr3R	5087834	5088334	501	*	4.28	2.78	5	-2.21	3.27e-05	0.00052	0	3	12	6.67	1.99	28.63	36.96	30.23	-	-	-	+	+	+	corto
chrX	9497072	9497572	501	*	6.07	5.29	6.57	-1.28	3.4e-05	0.00054	1	3	33	37.35	46.82	85.23	97.69	102.26	-	-	+	+	+	+	mgl
chr3R	19304127	19304627	501	*	3.96	2.15	4.73	-2.58	3.45e-05	0.000547	0	2	1	9.34	2.99	27.07	24.52	28.2	-	-	-	+	-	+	Dl
chr3L	9614644	9615144	501	*	5.01	3.96	5.61	-1.65	3.6e-05	0.000568	1	3	18	10.67	17.93	34.67	58.46	53.57	-	-	+	+	+	+	LanB2
chr3R	4346559	4347059	501	*	6.34	5.56	6.84	-1.28	3.69e-05	0.00058	3	3	38	48.02	55.79	102.23	123.34	117.89	+	+	+	+	+	+	hkb
chrX	7928864	7929364	501	*	5.32	5.91	4.31	1.6	3.76e-05	0.00059	3	1	70	72.02	38.35	21.47	26.02	11.97	+	+	+	-	+	-	mahe
chr4	788279	788779	501	*	4.56	3.01	5.29	-2.28	3.85e-05	0.0006	0	3	2	6.67	15.44	30.65	35.45	50.93	-	-	-	+	+	+	MED26
chr2L	21658465	21658965	501	*	4.53	3.36	5.17	-1.81	3.85e-05	0.0006	0	3	11	7.34	12.45	33.55	37.72	36.52	-	-	-	+	+	+	Cul2
chr3L	3997783	3998283	501	*	6.41	7.08	5.12	1.96	3.93e-05	0.00061	3	3	273	67.35	64.26	33.11	42.24	28.81	+	+	+	+	+	+
chr3R	6849822	6850322	501	*	3.06	0.29	3.95	-3.67	3.97e-05	0.000615	0	2	2	0.67	1	12.53	22.63	11.36	-	-	-	+	+	-	Scr
chr2R	10584138	10584638	501	*	5.14	4.22	5.7	-1.48	4.01e-05	0.00062	2	3	15	20.01	20.92	54.13	56.95	44.84	-	+	+	+	+	+	psq
chrX	5696387	5696887	501	*	3.59	1.5	4.41	-2.91	4.06e-05	0.000625	0	3	1	2	5.48	18.79	18.1	26.78	-	-	-	+	+	+	CG3149
chr2R	13570734	13571234	501	*	5.68	4.72	6.25	-1.53	4.08e-05	0.000626	2	3	14	38.68	26.4	63.75	72.42	92.52	-	+	+	+	+	+	CG42807
chr2L	246653	247153	501	*	5.47	4.54	6.04	-1.5	4.12e-05	0.00063	1	3	24	14.67	30.88	51.9	78.45	66.76	-	-	+	+	+	+	FBgn0265149
chr2L	21403681	21404181	501	*	4.72	3.25	5.43	-2.18	4.23e-05	0.000646	1	3	1	16.01	11.46	31.32	50.54	47.48	-	-	+	+	+	+	FBgn0051615
chr3L	3408854	3409354	501	*	4.56	3.37	5.21	-1.84	4.25e-05	0.000647	0	3	9	10	11.95	27.51	45.64	37.74	-	-	-	+	+	+	sty
chr2L	217188	217688	501	*	4.26	2.62	5	-2.38	4.37e-05	0.000663	0	2	2	6	10.46	41.83	19.99	34.29	-	-	-	+	-	+	FBgn0265151
chr3L	5770698	5771198	501	*	3.43	1.32	4.25	-2.93	4.4e-05	0.000665	0	2	3	4	0.5	16.11	22.63	18.26	-	-	-	-	+	+	Ppat-Dpck
chr3R	4867601	4868101	501	*	4.33	3.02	5	-1.98	4.43e-05	0.000668	3	3	7	11.34	5.98	27.07	37.72	31.25	+	+	+	+	+	+	opa
chr2R	20907190	20907690	501	*	5.73	4.8	6.3	-1.5	4.55e-05	0.000684	2	3	15	28.68	39.85	88.13	79.96	67.77	+	-	+	+	+	+	CAH15
chrX	7626953	7627453	501	*	5.33	4.35	5.91	-1.56	4.58e-05	0.000687	1	3	12	21.34	27.89	46.53	66.01	68.18	-	-	+	+	+	+	ct
chrX	18300685	18301185	501	*	5.58	4.46	6.21	-1.74	4.67e-05	0.000697	1	3	6	29.34	30.88	61.29	75.43	85.02	-	-	+	+	+	+
chr3R	23141854	23142354	501	*	5.06	3.7	5.74	-2.04	4.71e-05	0.000701	1	3	3	12.67	23.41	36.46	57.71	66.35	-	-	+	+	+	+	hh
chr2R	22514457	22514957	501	*	4.2	2.84	4.88	-2.04	4.72e-05	0.000701	0	2	10	4	7.47	27.51	33.57	27.39	-	-	-	+	-	+	px
chr2R	23573093	23573593	501	*	6.08	5.3	6.58	-1.28	4.87e-05	0.00072	1	3	46	34.01	38.35	81.42	118.06	87.66	+	-	-	+	+	+	apt
chr3L	17299691	17300191	501	*	3.31	4.11	1.33	2.79	4.88e-05	0.00072	2	0	30	12	9.96	2.68	3.02	1.83	+	-	+	-	-	-
chr2R	8655602	8656102	501	*	6.78	5.92	7.32	-1.4	5.04e-05	0.000742	3	3	38	74.02	69.24	134.44	179.16	165.37	+	+	+	+	+	+	ptc
chr3R	4994668	4995168	501	*	3.28	1	4.13	-3.13	5.09e-05	0.000746	0	3	1	2	2.99	13.87	21.88	16.64	-	-	-	+	+	+	plh
chr3L	20000798	20001298	501	*	4.91	3.88	5.5	-1.62	5.11e-05	0.000746	0	3	16	13.34	14.94	31.76	49.41	54.99	-	-	-	+	+	+	Gabat
chr2L	14486113	14486613	501	*	4.92	3.82	5.54	-1.72	5.11e-05	0.000746	0	3	10	15.34	16.94	31.99	61.48	45.86	-	-	-	+	+	+	FBgn0265944
chr4	209958	210458	501	*	4.31	2.87	5.01	-2.14	5.15e-05	0.000749	0	2	4	6	11.95	29.97	27.16	39.77	-	-	-	+	-	+	Crk
chr3L	16776589	16777089	501	*	3.85	2.25	4.59	-2.34	5.21e-05	0.000755	0	2	4	3.33	6.97	24.38	24.89	23.13	-	-	-	+	-	+	Nrt
chrX	12735093	12735593	501	*	4.1	2.58	4.82	-2.24	5.22e-05	0.000755	0	2	9	2	6.97	23.49	34.7	26.58	-	-	-	+	+	-	Smr
chr3R	28326544	28327044	501	*	4.52	3.33	5.17	-1.84	5.3e-05	0.000765	0	3	8	12.67	9.46	26.84	42.24	38.75	-	-	-	+	+	+	larp
chr2R	4546359	4546859	501	*	3.95	2.38	4.68	-2.3	5.48e-05	0.000788	0	3	3	8.67	3.98	22.59	27.16	27.19	-	-	-	+	+	+	Stlk
chr2R	10535734	10536234	501	*	5.82	4.97	6.35	-1.37	5.74e-05	0.000824	2	3	25	29.34	39.85	61.29	95.8	86.84	-	+	+	+	+	+	FBgn0263466
chr3R	21616192	21617125	934	*	5.77	4.85	6.33	-1.48	5.86e-05	0.000838	0	3	16	32.68	37.86	61.96	95.42	83.19	-	-	-	+	+	+	FBgn0264826
chr2L	21851419	21851919	501	*	4.98	3.98	5.56	-1.57	5.88e-05	0.000838	0	3	14	22.01	11.46	39.82	49.79	51.74	-	-	-	+	+	+
chr2L	4221149	4221649	501	*	4.13	2.75	4.82	-2.08	5.89e-05	0.000838	0	3	6	8.67	5.48	21.47	32.06	31.45	-	-	-	+	+	+	ft
chr3L	16475680	16476180	501	*	4.96	3.97	5.54	-1.56	5.93e-05	0.000842	1	3	14	12.67	20.42	40.04	49.41	49.71	-	-	+	+	+	+	aos
chr2R	5359892	5360392	501	*	4.59	3.25	5.28	-2.03	5.98e-05	0.000847	0	3	11	14	3.49	24.61	43.75	48.09	-	-	-	+	+	+	CG10417
chr2L	16279915	16280415	501	*	4.81	3.78	5.41	-1.63	6.06e-05	0.000856	0	3	14	14.67	12.45	37.8	55.07	34.49	-	-	-	+	+	+	crp
chr3L	11256002	11256502	501	*	3.78	2.08	4.54	-2.47	6.2e-05	0.000872	0	2	6	2.67	3.98	32.88	23.01	14	-	-	-	+	-	+	scyl
chr3R	30805750	30806250	501	*	4.51	3.34	5.15	-1.81	6.22e-05	0.000873	0	3	9	7.34	13.95	33.55	35.45	37.54	-	-	-	+	+	+	wts
chr2L	2163516	2164016	501	*	4.65	3.21	5.36	-2.15	6.45e-05	0.000903	0	3	1	13.34	13.45	34	53.18	36.12	-	-	-	+	+	+	aop
chr2R	20106342	20106842	501	*	5.45	4.59	5.98	-1.39	6.52e-05	0.00091	1	3	18	26.01	28.39	51.67	75.06	62.9	-	-	+	+	+	+
chr2L	9698497	9698997	501	*	3.94	2.26	4.7	-2.45	6.54e-05	0.000911	1	3	2	9.34	2.99	19.68	30.93	27.39	-	-	+	+	+	+	Pka-C1
chr3R	21373390	21374375	986	*	4.63	3.45	5.27	-1.82	6.86e-05	0.000952	0	2	6	17.34	9.46	35.12	42.24	38.15	-	-	-	+	-	+	mod(mdg4)
chr2R	7196382	7196882	501	*	5.25	5.9	4.04	1.86	6.92e-05	0.000954	3	3	103	40.01	36.36	14.09	26.4	8.93	+	+	+	+	+	+	pk
chr2L	224140	224640	501	*	4.52	3.39	5.15	-1.76	6.92e-05	0.000954	0	3	11	10	10.46	45.41	28.67	32.46	-	-	-	+	+	+	FBgn0265153
chr2L	19323537	19324037	501	*	5.59	4.49	6.21	-1.72	6.93e-05	0.000954	1	3	7	21.34	38.85	68.45	78.83	74.67	-	-	+	+	+	+	FBgn0267264
chr2L	2181976	2182476	501	*	3.3	1.15	4.13	-2.98	6.96e-05	0.000956	0	2	4	0.67	1.99	18.57	11.32	22.52	-	-	-	+	-	+	FBgn0265017
chr3R	10584981	10585481	501	*	4.19	2.69	4.91	-2.23	7.24e-05	0.000991	0	2	13	1.33	4.98	32.88	28.67	28.81	-	-	-	+	-	+	hth
chr2L	12459834	12460334	501	*	4.39	3.1	5.06	-1.96	7.27e-05	0.000993	0	2	4	13.34	8.47	33.33	30.55	36.32	-	-	-	+	-	+	bun
chr3L	17551496	17551996	501	*	3.9	2.02	4.69	-2.68	7.97e-05	0.00109	0	2	1	2.67	8.47	19.91	36.59	21.1	-	-	-	+	-	+	Jon74E
chr3R	21556975	21557475	501	*	4.13	2.53	4.87	-2.34	8e-05	0.00109	0	2	13	1.33	2.99	23.71	29.42	34.49	-	-	-	+	-	+	slou
chr2R	5981038	5981538	501	*	4.05	2.47	4.79	-2.32	8.1e-05	0.0011	0	3	2	4.67	9.96	26.62	29.8	26.38	-	-	-	+	+	+	mle
chr3L	2438992	2439492	501	*	5.31	4.27	5.91	-1.63	8.11e-05	0.0011	0	3	9	18.67	30.39	47.2	70.91	62.09	-	-	-	+	+	+	Svil
chr2R	8029316	8029816	501	*	4.21	2.97	4.87	-1.9	8.3e-05	0.00112	0	3	10	8	5.48	25.72	31.68	30.23	-	-	-	+	+	+	Optix
chr3R	11302814	11303314	501	*	4.35	2.78	5.08	-2.3	8.31e-05	0.00112	0	3	1	6.67	12.95	26.62	33.95	40.99	-	-	-	+	+	+	FBgn0051386
chr3R	28547124	28547624	501	*	5.4	4.49	5.96	-1.47	8.5e-05	0.00114	3	3	19	30.01	18.43	41.83	75.06	69.6	+	+	+	+	+	+	mIF2
chr3L	4842483	4842983	501	*	3.89	2.24	4.64	-2.4	8.5e-05	0.00114	0	3	3	2.67	8.47	23.93	21.88	28.81	-	-	-	+	+	+	CG13707
chr2R	24385670	24386170	501	*	5.18	5.84	3.92	1.93	8.55e-05	0.00114	3	1	104	36.68	31.38	9.84	25.27	10.15	+	+	+	-	+	-	mAChR-A
chr2L	11970674	11971174	501	*	5.74	4.68	6.34	-1.65	8.57e-05	0.00114	1	3	7	38.68	31.38	81.42	84.11	77.1	-	-	+	+	+	+	FBgn0263019
chr3L	14969155	14969655	501	*	5.09	4.1	5.68	-1.58	8.66e-05	0.00115	0	3	10	16.01	25.4	47.87	56.95	48.49	-	-	-	+	+	+	Tom
chr3R	13065186	13065686	501	*	6.33	5.53	6.84	-1.31	8.7e-05	0.00115	2	3	32	45.35	61.27	103.12	131.26	108.96	-	+	+	+	+	+	sim
chr3R	9024791	9025291	501	*	3.95	2.3	4.7	-2.4	8.73e-05	0.00115	0	3	1	9.34	4.48	23.04	24.89	30.03	-	-	-	+	+	+	neur
chr4	570625	571125	501	*	4.63	3.54	5.24	-1.7	8.77e-05	0.00116	0	3	9	10	15.94	35.57	38.85	39.16	-	-	-	+	+	+	ND-49
chrX	14476234	14476734	501	*	3.25	4.03	1.43	2.6	8.86e-05	0.00116	2	1	20	18.01	10.96	2.91	3.77	1.42	+	-	+	-	+	-	CG9411
chr3L	16043350	16043850	501	*	5.43	4.58	5.96	-1.39	9.11e-05	0.00119	3	3	16	24.67	30.88	53.69	69.4	63.92	+	+	+	+	+	+	Diap1
chrX	20165751	20166251	501	*	4.63	3.41	5.29	-1.87	9.16e-05	0.00119	0	3	6	8	17.93	36.24	44.51	36.32	-	-	-	+	+	+	Phf7
chr2R	4516306	4516806	501	*	4.88	3.81	5.48	-1.67	9.16e-05	0.00119	0	3	10	14.67	17.43	30.2	47.9	56	-	-	-	+	+	+	RpL38
chr3R	24272736	24273236	501	*	3.39	1.44	4.19	-2.74	9.29e-05	0.00121	0	3	5	2.67	0.5	16.11	19.24	19.28	-	-	-	+	+	+	jar
chr3L	10852551	10853051	501	*	4.33	3.13	4.97	-1.84	9.31e-05	0.00121	0	3	8	7.34	10.96	31.09	34.32	28.81	-	-	-	+	+	+	FBgn0266679
chr3L	2867509	2868009	501	*	5.15	2.67	6.01	-3.34	9.36e-05	0.00121	0	3	8	0.67	10.46	42.95	89.39	61.28	-	-	-	+	+	+	Tet
chr3R	18987785	18988285	501	*	3.44	1.25	4.28	-3.03	9.68e-05	0.00125	0	3	1	0.67	5.48	19.46	16.6	22.12	-	-	-	+	+	+	gukh
chrX	12751902	12752402	501	*	6.22	5.43	6.73	-1.3	9.8e-05	0.00126	3	3	30	40.68	58.28	93.28	118.43	106.73	+	+	+	+	+	+	FBgn0265830
chr3R	10584296	10584796	501	*	4.31	3.01	4.98	-1.97	9.89e-05	0.00127	0	3	6	6.67	11.46	32.88	38.09	23.74	-	-	-	+	+	+	hth
chr2L	17752583	17753083	501	*	4.01	2.44	4.74	-2.3	9.96e-05	0.00128	0	3	2	7.34	6.97	17.67	31.68	30.84	-	-	-	+	+	+	CadN
chr4	307790	308290	501	*	5	3.96	5.6	-1.64	0.000102	0.0013	1	3	12	16.67	17.93	28.86	56.58	59.86	-	-	+	+	+	+	Rad23
chrX	3452987	3453487	501	*	5.24	5.86	4.11	1.75	0.000103	0.00132	3	3	94	35.34	44.83	8.95	18.1	24.75	+	+	+	+	+	+	FBgn0266350
chr2L	6612253	6612753	501	*	3.19	0.78	4.04	-3.26	0.000106	0.00134	0	2	1	0.67	3.49	12.3	16.22	20.9	-	-	-	+	-	+	CG11050
chr3L	20517309	20517809	501	*	6.39	5.63	6.89	-1.26	0.000107	0.00135	2	3	36	48.02	64.26	115.65	130.88	108.35	-	+	+	+	+	+	CG5059
chr2R	10423108	10423608	501	*	3.54	1.74	4.32	-2.59	0.000107	0.00135	0	3	5	4	1	16.55	15.46	28	-	-	-	+	+	+	CG11825
chr3L	16480619	16481119	501	*	2.99	0.47	3.85	-3.38	0.000108	0.00136	0	2	3	0.67	0.5	19.91	11.32	12.17	-	-	-	+	-	+	aos
chr3R	25184222	25184722	501	*	5.5	4.68	6.02	-1.34	0.00011	0.00139	2	3	16	32.68	28.39	60.62	65.25	69.19	-	+	+	+	+	+	dan
chr3R	15417851	15418351	501	*	5.56	4.76	6.07	-1.3	0.000114	0.00143	1	3	27	20.67	33.87	57.94	78.07	65.13	-	-	+	+	+	+	FBgn0262367
chr3L	24028189	24028689	501	*	5.69	4.66	6.29	-1.63	0.000115	0.00144	2	3	10	28.68	37.36	52.34	81.47	100.84	-	+	+	+	+	+	CG40045
chr3L	7381313	7381813	501	*	3.22	1.04	4.05	-3.01	0.000117	0.00146	0	2	4	0.67	1.49	9.84	16.6	23.33	-	-	-	-	+	+	smid
chr2L	2144953	2145453	501	*	3.36	1.25	4.18	-2.93	0.000117	0.00146	0	3	3	0.67	3.49	25.28	10.18	18.87	-	-	-	+	+	+	TBCD
chr3L	23150305	23150805	501	*	5.29	4.42	5.83	-1.4	0.000119	0.00148	0	3	21	24.01	19.43	38.47	66.76	65.34	-	-	-	+	+	+	Vps11
chr2R	12088764	12089264	501	*	6.43	7.04	5.36	1.68	0.000121	0.0015	3	3	228	90.7	75.71	33.55	61.86	27.8	+	+	+	+	+	+	jeb
chr2L	3771531	3772031	501	*	5.43	4.61	5.95	-1.34	0.000122	0.0015	1	3	21	22.01	30.39	60.17	74.3	50.73	-	-	+	+	+	+	bowl
chr3R	11353349	11353849	501	*	4.81	3.82	5.4	-1.57	0.000122	0.00151	0	3	13	12	17.43	32.21	47.52	46.67	-	-	-	+	+	+	pros
chr3R	27425987	27426487	501	*	4.86	5.56	3.45	2.11	0.000123	0.00151	3	3	73	50.02	18.43	9.62	19.24	3.86	+	+	+	+	+	+	side
chr3R	26005907	26006407	501	*	4.85	3.75	5.47	-1.72	0.000123	0.00151	0	3	5	20.01	15.44	43.84	39.23	49.91	-	-	-	+	+	+	E(spl)mbeta-HLH
chr2R	5090298	5090798	501	*	5	3.91	5.62	-1.7	0.000125	0.00154	1	3	8	13.34	23.91	36.01	49.41	61.68	-	-	+	+	+	+	CG3107
chr3R	10583696	10584196	501	*	3.27	1.15	4.1	-2.95	0.000128	0.00156	0	2	2	0.67	3.98	18.79	13.96	18.67	-	-	-	+	-	+	hth
chr2L	21573073	21573573	501	*	4.28	2.72	5.01	-2.28	0.00013	0.00158	0	3	1	11.34	7.47	19.01	38.85	38.55	-	-	-	+	+	+	Lamp1
chr3R	17489320	17489820	501	*	2.93	3.79	0.45	3.34	0.000131	0.00159	3	3	17	20.01	4.48	0.67	3.02	0.41	+	+	+	+	+	+	Dscam3
chr3L	14002697	14003197	501	*	6.21	5.4	6.73	-1.33	0.000132	0.0016	2	3	35	39.35	52.3	71.13	133.14	114.24	-	+	+	+	+	+	Nprl3
chr2L	5069	6024	956	*	4.15	2.57	4.89	-2.32	0.000132	0.0016	0	3	1	5.34	11.46	24.83	34.32	29.83	-	-	-	+	+	+	CG11023
chr2L	4368550	4369050	501	*	4.56	3.41	5.19	-1.78	0.000133	0.00161	0	3	6	10	15.94	39.59	34.32	35.51	-	-	-	+	+	+	Traf4
chr3R	21640389	21640889	501	*	4	2.51	4.71	-2.2	0.000137	0.00165	0	2	2	6.67	8.47	26.17	22.25	30.23	-	-	-	+	-	+	E2f1
chr3R	12649314	12649814	501	*	4.55	3.44	5.16	-1.72	0.000139	0.00167	0	3	11	6.67	14.94	31.99	38.09	37.54	-	-	-	+	+	+	Dtg
chrX	17160412	17160912	501	*	4.26	3.04	4.91	-1.87	0.000139	0.00167	0	3	7	6.67	10.96	27.29	33.95	28.81	-	-	-	+	+	+	baz
chr3R	19799645	19800145	501	*	4.1	2.67	4.8	-2.13	0.000141	0.00168	0	3	4	4.67	10.46	22.37	27.91	33.28	-	-	-	+	+	+	bnl
chrX	13211371	13211871	501	*	3.83	2.34	4.55	-2.22	0.000141	0.00168	0	3	5	4.67	5.48	14.99	29.42	25.97	-	-	-	+	+	+	REG
chr3R	10588558	10589058	501	*	5.3	4.12	5.94	-1.82	0.000143	0.0017	0	3	5	13.34	33.87	65.99	49.41	69.19	-	-	-	+	+	+	hth
chr2L	597707	598207	501	*	3.84	2.2	4.59	-2.39	0.000144	0.00171	0	3	1	5.34	7.47	21.25	29.42	21.71	-	-	-	+	+	+
chr3R	24629949	24630449	501	*	3.36	1.15	4.19	-3.04	0.000145	0.00171	0	3	1	0.67	4.98	13.87	22.63	18.26	-	-	-	+	+	+	atl
chr3L	21807958	21808458	501	*	4.31	3.06	4.97	-1.91	0.000145	0.00171	0	2	7	6	11.95	25.28	29.42	39.16	-	-	-	+	-	+	eg
chr2L	14497570	14498070	501	*	3.3	1.19	4.13	-2.94	0.000145	0.00171	0	2	5	1.33	0.5	9.4	18.86	24.15	-	-	-	+	-	+	FBgn0266841
chr2L	10430772	10431272	501	*	4.86	3.73	5.48	-1.75	0.000147	0.00173	0	3	6	17.34	16.44	29.75	59.22	45.25	-	-	-	+	+	+	TfIIB
chr2R	7419015	7419515	501	*	5.36	4.58	5.86	-1.28	0.000147	0.00173	1	3	20	24.01	27.89	54.13	66.01	54.58	-	-	+	+	+	+	so
chrX	1947895	1948395	501	*	4.85	3.9	5.41	-1.51	0.000148	0.00173	0	3	11	16.01	17.93	38.25	47.15	42.41	-	-	-	+	+	+	Hr4
chrX	7604385	7604885	501	*	5.36	4.34	5.95	-1.61	0.000148	0.00173	1	3	8	21.34	31.38	46.08	69.4	69.6	-	-	+	+	+	+
chr2L	161648	162148	501	*	5.17	4.02	5.8	-1.78	0.00015	0.00175	1	3	11	7.34	30.39	42.73	67.89	56.61	-	-	+	+	+	+	spen
chr3R	23886502	23887002	501	*	6.88	6.2	7.34	-1.14	0.000152	0.00176	3	3	74	66.69	79.7	152.11	163.32	169.83	+	+	+	+	+	+	Pli
chr2R	21703479	21703979	501	*	2.87	0.08	3.76	-3.68	0.000154	0.00179	0	2	2	0.67	0.5	17.9	16.22	6.49	-	-	-	+	+	-	HmgD
chr2L	14490192	14490692	501	*	4.4	3.23	5.03	-1.8	0.000155	0.00179	0	3	5	12.67	10.46	31.76	32.06	34.29	-	-	-	+	+	+	noc
chr2L	18150240	18150740	501	*	5.3	4.35	5.87	-1.52	0.000155	0.00179	2	3	10	20.67	30.39	47.87	68.65	58.84	-	+	+	+	+	+	CG17681
chrX	9728926	9729426	501	*	3.97	2.6	4.66	-2.07	0.000156	0.00179	0	3	4	6.67	7.47	20.8	29.04	26.17	-	-	-	+	+	+	Sp1
chr2L	9145726	9146226	501	*	3.77	2.18	4.5	-2.32	0.000157	0.00181	0	3	4	2.67	6.97	16.55	26.02	25.36	-	-	-	+	+	+	CG32982
chr2L	10339148	10339648	501	*	4.78	3.67	5.39	-1.72	0.000158	0.00181	0	3	8	9.34	20.92	35.57	43	47.48	-	-	-	+	+	+	SamDC
chr2R	13563418	13563918	501	*	5.49	4.68	6.01	-1.33	0.000159	0.00182	1	3	16	28.68	32.38	57.26	70.91	65.34	-	-	+	+	+	+
chr3R	2858401	2858901	501	*	4.12	2.82	4.8	-1.98	0.000161	0.00184	3	3	6	4.67	10.46	27.96	26.4	29.02	+	+	+	+	+	+	FBgn0267430
chr3L	6964364	6964864	501	*	6.12	5.38	6.61	-1.23	0.000162	0.00185	2	3	30	48.02	47.32	82.09	114.28	96.99	-	+	+	+	+	+	sgl
chr2R	22860050	22860550	501	*	5.2	4.26	5.76	-1.5	0.000169	0.00192	3	3	29	18.01	10.46	49.21	71.29	42.2	+	+	+	+	+	+	inaD
chr3R	4852283	4852783	501	*	4.98	4.02	5.55	-1.53	0.00017	0.00192	0	2	24	16.67	7.97	50.33	39.23	50.73	-	-	-	+	-	+	opa
chr3R	14819503	14820003	501	*	4.65	3.57	5.26	-1.69	0.000172	0.00195	0	2	12	6.67	16.94	37.36	32.81	44.64	-	-	-	+	-	+	btsz
chr4	662964	663464	501	*	4.06	2.56	4.78	-2.23	0.000174	0.00196	0	2	1	8.67	7.97	22.59	26.02	34.09	-	-	-	+	-	+	Slip1
chr2L	21618614	21619114	501	*	5.29	4.5	5.8	-1.3	0.000174	0.00196	1	3	23	18.67	26.4	55.25	46.77	65.13	-	-	+	+	+	+	CG2201
chr2L	19165999	19166499	501	*	3.98	2.61	4.67	-2.06	0.000177	0.00199	0	3	5	5.34	7.97	19.24	30.17	26.78	-	-	-	+	+	+	brat
chr2R	16856236	16856736	501	*	4.45	3.38	5.06	-1.67	0.00018	0.00202	0	3	13	9.34	8.97	28.19	41.11	30.44	-	-	-	+	+	+	Fen1
chrX	3744432	3744932	501	*	5.46	4.57	6.01	-1.44	0.000182	0.00203	1	3	17	18.01	36.36	52.12	78.45	62.7	-	-	+	+	+	+	Tlk
chr2R	17813834	17814334	501	*	3.88	2.22	4.63	-2.41	0.000184	0.00205	0	2	1	10	2.99	29.3	24.14	20.7	-	-	-	+	-	+	grh
chr3R	5113171	5113671	501	*	3.62	1.94	4.38	-2.44	0.000185	0.00206	0	2	2	6	3.49	16.11	16.6	29.62	-	-	-	+	-	+
chr2R	13579633	13580133	501	*	5.2	4.31	5.74	-1.43	0.000186	0.00207	1	3	15	24.67	19.92	36.91	59.97	63.51	-	-	+	+	+	+
chr2L	10356519	10357019	501	*	5.09	4.03	5.69	-1.66	0.000186	0.00207	1	3	15	6.67	27.4	48.09	48.66	58.03	-	-	+	+	+	+	CG5367
chr2R	9520631	9521131	501	*	4.2	4.89	2.82	2.07	0.000186	0.00207	3	2	49	25.34	14.45	8.05	9.05	4.06	+	+	+	+	+	-	brp
chr4	1234722	1235222	501	*	4.36	3.22	4.98	-1.76	0.000191	0.00212	0	3	11	12	4.98	28.63	32.44	33.89	-	-	-	+	+	+	FBgn0053653
chr2L	13358059	13358559	501	*	1.8	2.75	-1.9	4.65	0.000193	0.00213	3	3	8	4.67	7.47	0.22	0.38	0.2	+	+	+	+	+	+	CG9395
chr3R	11960772	11961272	501	*	3.08	0.87	3.92	-3.05	0.000193	0.00213	0	3	1	2	2.49	20.13	12.45	12.78	-	-	-	+	+	+	aurA
chr2R	24046621	24047121	501	*	4.29	2.8	5.01	-2.2	0.000196	0.00215	0	3	1	8	11.95	22.82	31.31	42.41	-	-	-	+	+	+	sei
chr3L	12693281	12693781	501	*	5.4	4.5	5.96	-1.46	0.000201	0.0022	0	3	13	19.34	35.37	51.23	67.51	67.36	-	-	-	+	+	+	mirr
chr3R	23300137	23300637	501	*	4.68	3.74	5.25	-1.51	0.000201	0.0022	0	3	13	14	12.95	37.36	43.75	32.67	-	-	-	+	+	+	pnt
chr2R	4013769	4014269	501	*	4	2.64	4.69	-2.05	0.000203	0.00222	0	3	3	8.67	6.97	23.49	23.38	30.44	-	-	-	+	+	+	Haspin
chr3R	15647296	15647796	501	*	3.61	2.1	4.33	-2.23	0.000204	0.00222	0	2	6	3.33	3.49	16.11	19.24	24.96	-	-	-	+	-	+
chrX	17738831	17739331	501	*	5.39	4.64	5.89	-1.25	0.000207	0.00225	1	3	21	25.34	28.39	53.91	69.4	54.38	-	+	-	+	+	+	CG42684
chr2L	10226635	10227135	501	*	3.9	2.2	4.65	-2.45	0.000207	0.00225	0	3	1	3.33	9.46	18.34	29.42	27.8	-	-	-	+	+	+	CG5708
chr3R	26496128	26496628	501	*	3.61	4.38	1.85	2.53	0.000213	0.00231	2	0	40	7.34	14.94	4.92	2.64	3.25	+	-	+	-	-	-	plum
chr3R	6893016	6893516	501	*	5.11	3.96	5.74	-1.78	0.000215	0.00232	1	3	3	16.67	26.9	57.71	51.3	51.13	-	-	+	+	+	+	FBgn0267119
chr2L	9989717	9990217	501	*	4.35	3.14	5	-1.86	0.000216	0.00233	0	3	9	4	13.45	30.42	31.31	34.49	-	-	-	+	+	+	bib
chr3L	15235135	15235635	501	*	4.96	3.87	5.58	-1.71	0.000219	0.00236	1	3	10	10	23.91	30.42	50.54	62.49	-	-	+	+	+	+	Tollo
chr2R	5362929	5363429	501	*	4.96	3.94	5.55	-1.61	0.000221	0.00237	0	3	10	24.67	11.46	34	47.15	59.25	-	-	-	+	+	+	CG10417
chr2L	10544636	10545136	501	*	5.57	4.69	6.11	-1.42	0.000223	0.00238	1	3	12	27.34	38.35	63.98	70.53	72.84	-	-	+	+	+	+	Trim9
chr2R	15109225	15109725	501	*	5.41	4.66	5.9	-1.24	0.000223	0.00238	1	3	21	24.01	30.88	53.24	60.72	65.34	-	-	+	+	+	+
chrX	12841781	12842281	501	*	6.59	7.23	5.41	1.82	0.000225	0.00239	3	3	281	92.03	77.71	52.79	56.58	18.46	+	+	+	+	+	+	Pde9
chrX	2125483	2125983	501	*	4.12	2.51	4.86	-2.35	0.000226	0.0024	0	3	2	2.67	12.45	23.49	35.83	27.8	-	-	-	+	+	+	ph-d
chr3L	19165054	19165554	501	*	3.76	2.34	4.46	-2.13	0.000227	0.00241	0	2	4	4.67	6.48	25.05	21.12	19.88	-	-	-	+	-	+	fz2
chr2R	20913827	20914327	501	*	4.63	3.48	5.26	-1.78	0.000228	0.00241	0	3	15	4	14.45	27.74	43.75	43.42	-	-	-	+	+	+	FBgn0020617
chr3R	12252509	12253009	501	*	4.35	3.12	5	-1.88	0.000231	0.00244	0	3	5	6.67	14.45	29.75	32.81	33.68	-	-	-	+	+	+	CG3942
chr3R	30772740	30773240	501	*	3.15	1.12	3.96	-2.84	0.000232	0.00245	0	2	4	2	0.5	15.21	11.32	20.09	-	-	-	+	-	+	zfh1
chr3L	11009040	11009540	501	*	4.5	3.21	5.17	-1.96	0.000241	0.00253	0	3	5	7.34	15.44	22.37	51.3	34.49	-	-	-	+	+	+	klu
chr3L	26013951	26014451	501	*	4.78	3.49	5.45	-1.97	0.000242	0.00254	1	3	1	16.67	15.94	32.21	46.77	52.35	-	-	+	+	+	+	CG40178
chr3R	9428064	9428564	501	*	4.75	3.79	5.32	-1.52	0.000244	0.00256	1	3	11	12.67	17.93	33.55	41.11	44.84	-	+	-	+	+	+	ps
chr3L	14755089	14755589	501	*	4.31	2.89	5.01	-2.11	0.000245	0.00256	0	2	1	13.34	7.97	23.93	37.72	34.9	-	-	-	+	-	+	Trl
chrX	8777855	8778355	501	*	3.83	2.13	4.59	-2.46	0.000253	0.00264	0	3	4	8.67	0.5	19.68	32.06	20.7	-	-	-	+	+	+	Lim1
chr3L	1368270	1368770	501	*	4.47	3.22	5.13	-1.91	0.000254	0.00265	0	3	14	12	1.99	36.01	30.93	38.35	-	-	-	+	+	+	ru
chr3L	11344513	11345013	501	*	4.4	3.18	5.05	-1.87	0.000255	0.00265	0	3	4	12.67	10.46	23.26	34.7	41.19	-	-	-	+	+	+
chr2R	12172668	12173168	501	*	3.89	2.47	4.6	-2.12	0.000256	0.00266	0	2	7	6.67	2.99	15.43	23.01	34.09	-	-	-	+	-	+	CCT5
chr2R	4728827	4729327	501	*	4.07	2.7	4.76	-2.07	0.000256	0.00266	0	2	6	6	7.47	18.34	19.99	43.22	-	-	-	+	-	+	Nipped-B
chr2R	11397160	11397660	501	*	4.63	3.56	5.24	-1.68	0.000263	0.00272	0	3	8	12	15.44	26.4	37.72	49.31	-	-	-	+	+	+	sprt
chr3L	20621590	20622090	501	*	4.69	3.42	5.35	-1.93	0.000265	0.00273	0	3	1	16.67	14.45	35.57	44.13	43.02	-	-	-	+	+	+	knrl
chr3L	10447323	10447823	501	*	4.04	2.6	4.75	-2.15	0.000265	0.00273	0	3	1	8.67	8.47	29.75	26.4	24.35	-	-	-	+	+	+
chr2L	2731061	2731561	501	*	4.19	4.92	2.63	2.29	0.000268	0.00275	3	1	45	30.68	14.94	5.82	11.32	1.42	+	+	+	+	-	-	CG31689
chr2R	11398563	11399063	501	*	3.57	1.71	4.36	-2.65	0.000268	0.00275	0	2	2	7.34	0.5	16.11	19.24	26.17	-	-	-	+	-	+	FBgn0050506
chr3L	4230477	4230977	501	*	4.49	3.49	5.07	-1.58	0.000269	0.00275	0	3	12	9.34	12.45	33.11	29.42	38.55	-	-	-	+	+	+	ImpL2
chr2L	4651038	4651538	501	*	3.78	4.55	1.99	2.56	0.00027	0.00275	3	3	29	28.01	13.45	6.26	5.28	0.41	+	+	+	+	+	+	CG3355
chr3R	3103679	3104179	501	*	3.81	2.47	4.5	-2.03	0.000271	0.00276	1	3	4	6.67	5.98	22.82	22.25	22.73	-	-	+	+	+	+	FBgn0267430
chr3L	16278457	16278957	501	*	3.51	4.27	1.76	2.51	0.000276	0.0028	2	0	30	20.01	7.97	5.37	3.39	1.42	+	+	-	-	-	-	CG13050
chr3L	11487577	11488077	501	*	4.76	3.78	5.34	-1.57	0.000277	0.00281	0	3	10	10.67	20.42	35.79	42.62	43.42	-	-	-	+	+	+	chrb
chr2L	518264	518764	501	*	4.56	3.54	5.15	-1.61	0.000277	0.00281	0	3	11	8	15.94	34.67	36.59	35.1	-	-	-	+	+	+	ush
chr2R	4242799	4243299	501	*	4.18	2.8	4.87	-2.06	0.000279	0.00282	0	3	8	2	10.96	21.47	32.06	34.09	-	-	-	+	+	+	IntS3
chr3L	21067453	21067953	501	*	5.46	4.66	5.97	-1.31	0.000283	0.00286	0	3	16	35.34	24.41	51.45	66.01	70.61	-	-	-	+	+	+	siz
chrX	8561827	8562327	501	*	4.15	2.9	4.81	-1.91	0.000288	0.0029	0	3	4	8	10.46	24.16	31.68	28.41	-	-	-	+	+	+	CG12112
chr3R	16913426	16913926	501	*	4.35	3.31	4.95	-1.64	0.000289	0.0029	0	3	12	7.34	10.46	28.63	32.44	31.86	-	-	-	+	+	+	FBgn0264857
chr2L	19134932	19135432	501	*	5.37	4.62	5.87	-1.25	0.000291	0.00291	1	3	18	24.67	30.88	60.17	62.61	52.55	-	-	+	+	+	+	brat
chr3L	24723659	24724159	501	*	3.98	2.46	4.7	-2.25	0.000292	0.00292	0	2	1	6	9.46	29.53	18.86	29.83	-	-	-	+	-	+	scro
chr3R	23195685	23196185	501	*	4.02	2.56	4.73	-2.18	0.000296	0.00295	0	3	1	6.67	9.96	28.19	24.89	26.58	-	-	-	+	+	+	cnc
chr2L	15254479	15254979	501	*	3.4	1.66	4.16	-2.5	0.000298	0.00297	0	3	5	4	0.5	18.79	18.48	16.44	-	-	-	+	+	+	dao
chr2R	17548098	17548598	501	*	5.23	4.36	5.76	-1.4	0.000298	0.00297	1	3	15	15.34	31.38	61.07	50.92	51.13	-	-	+	+	+	+	RpL18A
chr4	443782	444282	501	*	3.89	2.35	4.61	-2.26	0.000302	0.003	0	3	1	5.34	8.97	22.59	21.88	29.02	-	-	-	+	+	+	CaMKI
chr3L	11342672	11343172	501	*	4.53	3.38	5.16	-1.78	0.000305	0.00303	0	3	4	15.34	11.95	32.66	44.88	29.83	-	-	-	+	+	+	FBgn0266785
chr2L	22247649	22248149	501	*	4.38	3.19	5.03	-1.84	0.000309	0.00306	0	3	5	11.34	10.96	20.58	37.72	39.57	-	-	-	+	+	+	RpL21
chr3L	27859231	27859731	501	*	3.09	0.96	3.91	-2.96	0.000311	0.00307	0	3	1	3.33	1.49	10.74	21.5	12.99	-	-	-	+	+	+	eIF4B
chr2L	12678162	12678662	501	*	5.87	5.13	6.36	-1.23	0.000318	0.00313	2	3	46	24.01	34.87	60.4	95.42	90.29	+	-	+	+	+	+	pdm2
chr2R	17679087	17679587	501	*	4.59	3.42	5.23	-1.81	0.000319	0.00314	0	3	3	12.67	16.44	32.66	36.59	43.02	-	-	-	+	+	+	Sema1b
chr2R	11198763	11199263	501	*	6.46	5.82	6.9	-1.08	0.000321	0.00315	2	3	46	64.69	58.28	121.46	119.94	116.26	-	+	+	+	+	+	shn
chr3R	11763651	11764151	501	*	4.19	3.1	4.81	-1.71	0.000321	0.00315	0	2	10	6.67	8.97	28.41	26.4	29.22	-	-	-	+	-	+	Lk6
chr3L	13081491	13081991	501	*	4.8	3.83	5.37	-1.55	0.000324	0.00317	0	3	11	10.67	20.92	49.44	34.7	40.18	-	-	-	+	+	+	FBgn0263661
chr3L	14131546	14132046	501	*	5.14	2.64	6	-3.37	0.000325	0.00317	0	3	1	14.67	2.99	41.16	73.17	78.32	-	-	-	+	+	+	Sox21b
chr3R	27111694	27112194	501	*	4.5	3.26	5.16	-1.91	0.000326	0.00318	0	3	4	18.67	5.98	27.96	44.51	35.1	-	-	-	+	+	+	CG5815
chrX	11354396	11354896	501	*	2.64	-0.08	3.52	-3.61	0.000337	0.00328	1	3	1	1.33	0.5	12.97	10.56	10.96	-	+	-	+	+	+	dsh
chr3R	16960211	16960711	501	*	5.85	5	6.38	-1.38	0.000339	0.00329	1	3	19	24.67	52.3	71.58	82.98	95.16	-	-	+	+	+	+	Abd-B
chr3R	13064113	13064613	501	*	7.29	6.44	7.82	-1.38	0.000339	0.00329	3	3	47	95.36	118.55	204.23	254.59	218.73	+	+	+	+	+	+	sim
chrX	13739476	13739976	501	*	3.41	1.61	4.19	-2.58	0.00034	0.00329	0	2	1	2.67	5.48	14.99	21.88	17.86	-	-	-	+	+	-	Grip91
chr3R	7103431	7103931	501	*	4.4	3.23	5.03	-1.8	0.000348	0.00336	3	3	12	6.67	9.46	23.93	50.54	23.74	+	+	+	+	+	+	Alh
chrX	7336571	7337551	981	*	5.83	5.19	6.27	-1.08	0.000349	0.00336	1	3	35	39.35	35.37	68.45	82.22	81.37	-	-	+	+	+	+	CBP
chr2R	22689761	22690261	501	*	7.12	6.42	7.59	-1.17	0.000364	0.0035	3	3	62	92.7	101.62	191.48	192.36	193.77	+	+	+	+	+	+	Ppa
chr2L	10255676	10256176	501	*	4.79	3.58	5.43	-1.85	0.000366	0.0035	1	3	3	12	20.92	29.97	43.37	56.41	-	-	+	+	+	+	CG5676
chr3L	620979	621479	501	*	4.32	3.08	4.98	-1.89	0.000366	0.0035	0	3	4	8	13.45	23.93	40.36	30.23	-	-	-	+	+	+	CG43337
chr3R	7996122	7996622	501	*	4.27	4.86	3.26	1.6	0.000367	0.00351	3	2	35	23.34	28.89	10.07	11.32	7.3	+	+	+	+	+	-	ELOVL
chr2L	11221181	11221681	501	*	3.66	1.76	4.45	-2.69	0.000368	0.00351	0	3	1	0.67	8.47	25.05	19.99	20.49	-	-	-	+	+	+	ab
chr4	314629	315129	501	*	4.6	3.49	5.22	-1.73	0.000375	0.00357	1	3	14	4.67	14.94	30.87	29.04	51.94	-	-	+	+	+	+	Zip102B
chrX	8056574	8057074	501	*	3.7	2.02	4.45	-2.44	0.000377	0.00359	0	2	1	4.67	6.48	11.86	25.65	28.2	-	-	-	-	+	+	fs(1)h
chr3R	7083356	7083856	501	*	5.7	6.31	4.62	1.69	0.00038	0.0036	3	3	133	65.35	39.35	17.67	43.37	12.78	+	+	+	+	+	+	alphaTub84B
chr2L	21629149	21629649	501	*	4.8	3.92	5.34	-1.42	0.000388	0.00367	0	3	16	12	17.43	32.88	47.9	40.99	-	-	-	+	+	+	Df31
chr3L	10861159	10861659	501	*	4.35	3.06	5.02	-1.96	0.00039	0.00368	2	3	9	2	13.95	33.55	26.4	37.33	-	+	+	+	+	+	tna
chrX	4508104	4508604	501	*	4.57	3.6	5.14	-1.54	0.00039	0.00368	0	3	11	16.01	9.46	28.86	38.47	38.55	-	-	-	+	+	+	FBgn0052773
chr3R	24006134	24006634	501	*	4.58	5.23	3.33	1.9	0.000393	0.0037	3	3	55	34.01	23.91	5.37	19.61	5.28	+	+	+	+	+	+	KrT95D
chr2L	20514019	20514519	501	*	4.44	5.05	3.35	1.7	0.000395	0.00371	2	0	42	40.01	17.43	8.28	9.05	13.19	+	+	-	-	-	-	FBgn0267266
chrX	2042081	2042581	501	*	3.53	2.06	4.24	-2.18	0.000395	0.00371	0	2	7	2	3.49	17.67	19.99	19.07	-	-	-	+	-	+	Actn
chr3R	10557310	10557810	501	*	5.8	6.35	4.91	1.44	0.0004	0.00374	3	3	128	64.69	52.3	27.07	44.51	18.67	+	+	+	+	+	+	hth
chr2L	10422574	10423074	501	*	4.86	3.84	5.45	-1.61	0.000401	0.00375	1	3	6	14	22.91	38.92	41.87	50.32	-	-	+	+	+	+	pie
chr3L	14452666	14453166	501	*	4.97	4.09	5.51	-1.43	0.000402	0.00375	0	3	9	22.01	19.92	46.53	40.73	49.91	-	-	-	+	+	+	bbg
chr3R	10616913	10617413	501	*	5.03	4.25	5.53	-1.28	0.000403	0.00375	1	3	17	18.67	21.42	41.83	45.26	51.74	-	-	+	+	+	+	hth
chr3R	5263909	5264409	501	*	4.23	2.86	4.92	-2.06	0.000415	0.00386	0	3	3	15.34	3.49	27.96	36.21	26.78	-	-	-	+	+	+	Tim17a2
chr2R	20032084	20032584	501	*	4.56	3.56	5.14	-1.58	0.000417	0.00387	0	3	17	6	12.45	32.21	32.44	41.39	-	-	-	+	+	+
chr4	610355	610855	501	*	5.07	3.97	5.69	-1.73	0.000422	0.00391	1	3	6	16.01	24.91	28.41	52.43	74.26	-	-	+	+	+	+	Eph
chr2L	22567182	22567682	501	*	2.77	0.41	3.62	-3.21	0.000425	0.00393	0	2	1	2	1	12.75	10.56	13.59	-	-	-	+	-	+
chr3R	16242466	16242966	501	*	5.31	4.41	5.86	-1.44	0.000426	0.00393	1	3	13	16.01	34.87	45.63	62.23	65.94	-	-	+	+	+	+	tara
chr3R	23157040	23157540	501	*	5.56	4.86	6.03	-1.18	0.000429	0.00395	1	3	23	26.01	37.86	60.62	65.25	70.61	-	-	+	+	+	+	unk
chr3R	8131956	8132456	501	*	4.01	4.69	2.69	1.99	0.00043	0.00395	2	0	36	27.34	13.95	3.8	10.94	4.67	+	-	+	-	-	-
chr2L	18014101	18014601	501	*	5.99	6.58	5	1.58	0.000432	0.00396	3	2	156	80.03	50.81	29.08	50.92	15.83	+	+	+	+	-	+	elfless
chr2R	22242825	22243325	501	*	4.35	3.3	4.95	-1.66	0.000436	0.00399	0	3	11	6	12.45	27.96	34.32	30.64	-	-	-	+	+	+	dve
chr3L	24975946	24976446	501	*	4.43	3.33	5.04	-1.72	0.000437	0.004	0	3	5	12.67	12.45	25.5	34.7	38.75	-	-	-	+	+	+	ND-AGGG
chr3L	15728101	15728601	501	*	4	2.74	4.67	-1.93	0.000438	0.004	0	3	5	10	4.98	18.12	26.78	31.45	-	-	-	+	+	+	comm
chr2R	17801544	17802044	501	*	6.71	6.08	7.15	-1.07	0.000438	0.004	3	3	56	79.36	67.74	141.15	147.47	138.18	+	+	+	+	+	+	grh
chr2L	19448122	19448622	501	*	3.97	2.43	4.7	-2.27	0.000441	0.00401	0	2	1	8.67	6.48	39.82	14.33	23.94	-	-	-	+	-	+	Top2
chr3R	30766919	30767419	501	*	5.12	4.16	5.7	-1.54	0.000448	0.00407	0	3	7	30.01	16.44	63.98	41.49	50.32	-	-	-	+	+	+	zfh1
chr3R	31221620	31222120	501	*	5.28	4.57	5.75	-1.19	0.00045	0.00408	2	3	23	22.67	25.4	44.96	57.71	59.05	-	+	+	+	+	+	ATPsynC
chr3R	17056201	17056701	501	*	3.95	2.7	4.6	-1.91	0.000454	0.00411	0	3	7	4	8.47	20.58	23.38	29.02	-	-	-	+	+	+	Dad
chr2R	6585819	6586319	501	*	3.7	2.37	4.38	-2.01	0.000456	0.00411	0	2	4	6	5.48	22.37	20.37	19.68	-	-	-	+	-	+	jing
chrX	9152196	9152696	501	*	4.71	3.78	5.27	-1.49	0.000456	0.00411	0	3	10	14.67	16.44	37.36	47.15	31.04	-	-	-	+	+	+	His3.3B
chr2R	1255970	1256470	501	*	4.51	5.09	3.51	1.58	0.000459	0.00413	3	1	45	30.01	27.4	10.29	16.6	7.3	+	+	+	-	-	+
chr3L	15329626	15330126	501	*	4.05	2.87	4.69	-1.82	0.000461	0.00414	0	2	7	6	8.97	21.25	30.93	25.16	-	-	-	+	-	+	FBgn0262892
chr3L	8833313	8833813	501	*	3.82	2.13	4.58	-2.45	0.000462	0.00414	0	3	1	2.67	9.46	14.32	29.04	28.41	-	-	-	+	+	+	CG32026
chr2R	5416355	5416855	501	*	3.49	1.89	4.23	-2.34	0.000464	0.00415	0	2	3	4.67	3.49	10.51	24.14	21.71	-	-	-	-	+	+	FBgn0259247
chrX	10931002	10931502	501	*	3.28	1.44	4.06	-2.62	0.000466	0.00416	0	2	1	4.67	2.49	10.74	19.24	20.09	-	-	-	-	+	+	Myo10A
chr3R	12647912	12648412	501	*	5.01	4.11	5.56	-1.45	0.000472	0.00421	2	3	9	25.34	17.43	40.94	57.33	43.22	-	+	+	+	+	+	Dtg
chr3R	29255211	29255711	501	*	5.28	4.45	5.8	-1.35	0.00048	0.00427	1	3	12	22.67	30.88	62.86	46.77	57.22	-	-	+	+	+	+	stg
chr2R	1440845	1441345	501	*	4.7	3.79	5.26	-1.47	0.000487	0.00433	0	3	16	18.01	7.47	36.91	39.23	38.75	-	-	-	+	+	+	l(2)41Ab
chr3L	23125711	23126211	501	*	4.93	4.01	5.48	-1.47	0.000493	0.00437	1	3	9	19.34	19.92	32.66	48.66	52.76	-	-	+	+	+	+	CG33217
chr3L	15825486	15825986	501	*	4.19	2.98	4.84	-1.86	0.000494	0.00438	0	3	5	6.67	11.95	24.38	23.76	37.54	-	-	-	+	+	+	DCP2
chr3R	4399826	4400326	501	*	3.95	2.53	4.65	-2.12	0.000495	0.00438	0	3	1	7.34	8.97	24.83	20.74	29.83	-	-	-	+	+	+	CG9855
chrX	19842575	19843075	501	*	2.68	-0.47	3.6	-4.07	0.000497	0.00439	0	2	1	0.67	0.5	2.46	16.22	17.65	-	-	-	-	+	+	pico
chrX	15934052	15934552	501	*	3.85	2.35	4.57	-2.22	0.000505	0.00445	0	3	1	5.34	8.97	20.36	20.74	30.03	-	-	-	+	+	+	Stim
chr3R	16099620	16100120	501	*	5.76	5.03	6.24	-1.21	0.000508	0.00447	1	3	22	28.68	47.32	72.03	74.68	80.55	-	-	+	+	+	+	Akt1
chr2R	11527870	11528370	501	*	4.57	3.23	5.25	-2.02	0.000508	0.00447	0	2	14	0.67	13.45	42.28	46.39	25.36	-	-	-	+	+	-	en
chrX	13987464	13987964	501	*	4.16	4.87	2.74	2.12	0.00051	0.00447	3	3	45	22.01	20.42	2.68	13.96	3.45	+	+	+	+	+	+	FBgn0265866
chrX	16241912	16242412	501	*	4.61	3.69	5.16	-1.47	0.000512	0.00448	0	3	10	17.34	11.46	36.46	36.59	34.29	-	-	-	+	+	+
chr3L	872403	872903	501	*	4.03	2.67	4.72	-2.04	0.000515	0.0045	0	2	6	2.67	10.46	17.45	30.93	30.44	-	-	-	+	-	+	Usp10
chr2L	2013742	2014242	501	*	5.18	4.43	5.67	-1.24	0.000516	0.0045	0	3	20	27.34	17.43	44.74	59.59	48.49	-	-	-	+	+	+	CG4238
chr2R	20831874	20832374	501	*	5.44	4.71	5.92	-1.21	0.000519	0.00452	1	3	26	18.01	34.37	57.26	67.89	56.2	-	-	+	+	+	+	insc
chr2R	17753320	17753820	501	*	3.7	2.07	4.45	-2.37	0.000521	0.00452	0	2	1	2.67	8.97	22.82	22.63	20.09	-	-	-	+	-	+	Sardh
chr3R	3734595	3735095	501	*	5.24	4.45	5.75	-1.3	0.000521	0.00452	1	3	13	25.34	27.4	46.98	52.05	62.7	-	-	+	+	+	+	Tim17b
chr3R	3733976	3734476	501	*	3.58	2	4.32	-2.32	0.000522	0.00453	0	3	1	6	4.98	14.54	24.89	20.29	-	-	-	+	+	+	Tim17b
chr2R	22270539	22271039	501	*	5.71	5.04	6.17	-1.13	0.000527	0.00456	2	3	45	23.34	30.39	65.99	78.83	70.81	+	+	-	+	+	+	dve
chr2L	20783024	20783524	501	*	4.12	2.7	4.83	-2.13	0.000529	0.00457	0	3	1	14	4.48	29.75	24.52	30.84	-	-	-	+	+	+	cad
chr3R	5090244	5090744	501	*	4.94	4.15	5.45	-1.29	0.000531	0.00458	0	3	18	14	21.42	44.74	43	43.22	-	-	-	+	+	+
chrX	3414636	3415136	501	*	5.64	6.23	4.61	1.62	0.000541	0.00465	1	1	143	43.35	39.35	15.88	36.21	21.1	+	-	-	-	+	-	CG12535
chrUn_CP007094v1	5451	5951	501	*	6.23	6.83	5.18	1.65	0.000541	0.00465	3	3	188	95.36	57.28	28.19	63.74	16.84	+	+	+	+	+	+
chr2L	17266636	17267136	501	*	4.3	3.15	4.93	-1.78	0.000545	0.00467	0	3	4	14.67	7.97	27.29	29.42	34.49	-	-	-	+	+	+
chr3L	20594333	20594833	501	*	4.55	5.24	3.2	2.04	0.000549	0.0047	3	3	51	43.35	18.93	8.5	16.97	2.03	+	+	+	+	+	+
chrX	17886352	17886852	501	*	4.62	3.65	5.19	-1.54	0.000549	0.0047	0	3	8	13.34	16.44	33.33	44.88	31.65	-	-	-	+	+	+	CG6788
chrX	20693962	20694462	501	*	6.37	5.65	6.85	-1.2	0.000551	0.00471	3	3	30	71.36	49.31	105.36	121.83	118.7	+	+	+	+	+	+	run
chr3L	10851288	10851788	501	*	4.74	3.73	5.32	-1.59	0.000553	0.00471	0	3	6	18.01	15.94	30.42	50.16	39.36	-	-	-	+	+	+	FBgn0266679
chr2R	22513744	22514244	501	*	4.3	3.12	4.93	-1.81	0.000561	0.00477	0	3	13	2.67	10.46	27.07	38.09	26.58	-	-	-	+	+	+	px
chrX	8676577	8677077	501	*	4.39	3.12	5.06	-1.94	0.00057	0.00484	0	2	4	4.67	17.43	27.74	34.32	37.94	-	-	-	+	-	+	CG12772
chr2R	12990619	12991119	501	*	4.21	3.14	4.82	-1.68	0.000575	0.00487	0	2	8	10	8.47	27.29	21.88	35.51	-	-	-	+	-	+	CG33798
chr2R	5122071	5122571	501	*	3.77	2.22	4.5	-2.28	0.000576	0.00487	0	3	3	2	8.97	20.13	16.22	31.45	-	-	-	+	+	+	gus
chr2L	22537944	22538444	501	*	3.93	2.47	4.64	-2.17	0.000577	0.00488	0	3	1	6.67	8.97	17.67	24.52	32.46	-	-	-	+	+	+	CG17490
chr3L	3070466	3070966	501	*	5.6	4.92	6.06	-1.14	0.000581	0.00489	1	3	35	22.67	33.37	54.58	77.7	67.97	+	-	-	+	+	+	CG11486
chr3L	6125030	6125530	501	*	4.83	3.63	5.47	-1.85	0.000582	0.00489	2	3	1	16.67	19.43	35.34	52.8	45.25	-	+	+	+	+	+	l(3)mbn
chr3R	8228497	8228997	501	*	4.54	5.26	3.04	2.23	0.000582	0.00489	2	1	88	15.34	11.95	12.53	6.41	5.68	+	-	+	+	-	-	FBgn0267110
chr3L	11417874	11418374	501	*	3.44	1.68	4.21	-2.52	0.000583	0.0049	0	2	3	0.67	5.98	12.3	21.88	21.31	-	-	-	+	-	+
chr2R	22700285	22700785	501	*	4.51	3.5	5.1	-1.6	0.000584	0.0049	0	3	9	8	16.94	29.53	36.59	36.73	-	-	-	+	+	+	robo1
chr3R	5021496	5021996	501	*	3.12	1.15	3.92	-2.77	0.000592	0.00495	0	2	3	0.67	2.99	20.8	16.6	8.12	-	-	-	+	+	-
chrX	7937460	7937960	501	*	4.93	4.09	5.46	-1.37	0.000594	0.00496	0	3	13	14	23.91	42.73	39.6	49.71	-	-	-	+	+	+	Ubr3
chrX	3162784	3163284	501	*	4.82	3.71	5.43	-1.72	0.0006	0.005	1	3	5	13.34	20.92	26.17	59.97	43.62	-	-	+	+	+	+	N
chr2R	2403466	2403966	501	*	7.03	7.61	6.01	1.6	0.000601	0.005	3	3	340	139.38	108.59	60.4	98.06	35.51	+	+	+	+	+	+
chr3R	23292905	23293405	501	*	3.6	2.29	4.28	-1.99	0.000603	0.00501	0	2	7	4.67	2.99	19.24	19.61	19.48	-	-	-	+	-	+	pnt
chr2R	9979081	9979581	501	*	5.1	4.29	5.62	-1.33	0.000608	0.00504	0	3	28	17.34	13.45	62.19	49.03	36.12	-	-	-	+	+	+	eve
chr2R	11710093	11710593	501	*	4.74	3.81	5.3	-1.48	0.00061	0.00505	0	3	12	14.67	15.44	26.4	38.47	52.96	-	-	-	+	+	+	pyr
chr3L	377155	377655	501	*	4.23	3.12	4.85	-1.72	0.00061	0.00505	0	3	7	6.67	12.45	25.95	33.95	26.38	-	-	-	+	+	+	trh
chr3L	23095267	23095767	501	*	5.54	4.77	6.04	-1.27	0.000623	0.00514	2	3	17	28.68	36.36	48.32	75.43	73.65	-	+	+	+	+	+	RpL10
chr3R	16629282	16629782	501	*	4.44	4.99	3.53	1.46	0.00063	0.00519	3	3	40	31.34	23.91	11.18	12.45	10.96	+	+	+	+	+	+	Fas1
chr2L	14540100	14540600	501	*	3.6	1.89	4.37	-2.47	0.000631	0.00519	0	2	3	0.67	7.47	14.09	28.67	19.07	-	-	-	+	+	-
chr3L	23099333	23099833	501	*	4.95	3.76	5.59	-1.83	0.000642	0.00528	1	3	3	11.34	26.4	31.76	48.28	64.52	-	-	+	+	+	+	CkIIalpha
chr2R	19271560	19272060	501	*	4.28	3.09	4.92	-1.82	0.000645	0.00529	0	2	4	6.67	14.94	30.87	29.42	30.44	-	-	-	+	-	+	rib
chr3R	12128415	12128915	501	*	5.79	5.09	6.25	-1.16	0.000658	0.00539	2	3	22	36.01	44.33	66.88	76.19	86.03	-	+	+	+	+	+	FBgn0011905
chrUn_CP007087v1	32017	32517	501	*	6.09	6.67	5.09	1.58	0.000663	0.00542	3	3	165	94.7	45.83	27.29	56.95	17.86	+	+	+	+	+	+
chr2R	13691548	13692048	501	*	3.35	4.14	1.45	2.69	0.000665	0.00543	3	3	30	19.34	3.49	4.7	1.89	1.62	+	+	+	+	+	+	CG17716
chr2R	4130681	4131181	501	*	5.42	4.75	5.88	-1.12	0.000666	0.00543	2	3	27	22.01	31.88	52.34	61.48	62.29	+	-	+	+	+	+	CG17683
chr2L	5092848	5093348	501	*	4.61	3.65	5.18	-1.54	0.000673	0.00547	0	3	9	16.67	11.95	27.29	48.28	33.48	-	-	-	+	+	+	Pgant5
chr3R	13382507	13383007	501	*	4.5	3.56	5.07	-1.51	0.000673	0.00547	0	3	9	13.34	12.95	27.07	33.95	39.57	-	-	-	+	+	+	CG9813
chr3R	16878481	16878981	501	*	3.84	2.6	4.5	-1.9	0.000679	0.00551	0	2	5	4.67	8.47	21.03	21.88	24.75	-	-	-	+	-	+	FBgn0264857
chr3L	5881220	5881720	501	*	4.39	3.41	4.97	-1.56	0.000687	0.00555	0	3	9	9.34	13.45	28.41	36.21	29.22	-	-	-	+	+	+	CG13287
chrX	21630028	21630528	501	*	4.26	2.97	4.93	-1.97	0.000687	0.00555	0	3	1	10	12.45	24.61	33.95	33.07	-	-	-	+	+	+	DIP1
chr3R	24048012	24048512	501	*	3.42	1.61	4.2	-2.59	0.000687	0.00555	0	3	2	0.67	6.48	14.32	15.46	25.36	-	-	-	+	+	+	Rox8
chr3R	9037816	9038316	501	*	3.82	2.5	4.5	-2	0.000693	0.00559	0	2	2	8	6.97	21.7	24.89	21.31	-	-	-	+	-	+	neur
chrX	11277679	11278179	501	*	5.25	5.86	4.19	1.66	0.000697	0.00561	2	1	112	27.34	34.37	17.9	25.65	11.36	+	-	+	+	-	-	CG44422
chrX	3161962	3162462	501	*	4.07	2.59	4.79	-2.19	0.000699	0.00561	0	3	6	0.67	11.46	23.04	36.96	22.73	-	-	-	+	+	+	N
chr2R	5697495	5697995	501	*	4.89	3.91	5.47	-1.55	0.000699	0.00561	0	3	7	13.34	24.91	39.15	38.47	55.19	-	-	-	+	+	+	CG17337
chr2L	22981510	22982010	501	*	4.31	3.01	4.98	-1.98	0.000703	0.00563	0	3	1	8.67	14.45	26.4	35.08	33.48	-	-	-	+	+	+	cta
chr3L	16408785	16409285	501	*	4.2	3.19	4.79	-1.61	0.000719	0.00575	0	2	10	7.34	9.96	31.76	24.89	26.58	-	-	-	+	-	+	fax
chr2L	9988118	9988618	501	*	5.86	5.05	6.38	-1.33	0.000721	0.00576	1	3	13	38.01	48.32	77.62	79.96	92.32	-	-	+	+	+	+	bib
chr2L	10333050	10333550	501	*	3.6	2.04	4.34	-2.3	0.000726	0.00579	0	3	1	5.34	5.98	12.3	23.76	24.55	-	-	-	+	+	+	Schip1
chr3L	15234409	15234909	501	*	3.85	2.65	4.49	-1.85	0.000734	0.00584	0	3	5	7.34	6.48	18.79	22.25	26.58	-	-	-	+	+	+	Tollo
chr2L	160711	161211	501	*	4.78	3.95	5.31	-1.36	0.000735	0.00584	0	3	19	13.34	13.95	30.2	50.16	38.75	-	-	-	+	+	+	spen
chrX	18799312	18799812	501	*	4.84	3.93	5.4	-1.47	0.000738	0.00584	0	3	7	16.67	21.92	38.47	41.11	47.07	-	-	-	+	+	+	bnb
chrX	17651670	17652170	501	*	5.16	4.34	5.68	-1.35	0.000739	0.00584	0	3	19	16.67	24.91	44.96	73.17	35.91	-	-	-	+	+	+	RhoGAPp190
chrX	9042216	9042716	501	*	4.88	3.94	5.44	-1.5	0.000739	0.00584	0	3	18	8.67	19.43	31.76	62.99	35.71	-	-	-	+	+	+	Nost
chr2L	14893207	14893707	501	*	3.19	3.93	1.58	2.35	0.000739	0.00584	2	0	22	16.67	6.97	2.68	2.64	3.65	+	+	-	-	-	-
chr2L	7519545	7520045	501	*	4.5	3.62	5.04	-1.41	0.000741	0.00584	0	3	13	12	11.95	32.88	30.93	34.7	-	-	-	+	+	+	FBgn0264891
chr3R	4803209	4803709	501	*	5.99	5.18	6.5	-1.32	0.000742	0.00584	2	3	15	53.35	40.35	73.59	98.06	99.83	-	+	+	+	+	+	ctrip
chr3R	6912687	6913187	501	*	5.03	4.22	5.55	-1.32	0.000743	0.00584	1	3	13	18.01	24.91	37.36	50.16	52.55	-	-	+	+	+	+	Antp
chr2R	14388468	14388968	501	*	2.87	3.74	0.35	3.39	0.000745	0.00585	2	1	29	4.67	6.48	0.22	3.39	0.2	+	-	+	+	-	-	CG10104
chrX	17802256	17802756	501	*	3.63	2.08	4.35	-2.28	0.000748	0.00585	0	2	3	8.67	1	17.45	19.99	23.94	-	-	-	+	-	+	OdsH
chr3L	27422878	27423378	501	*	4.31	4.97	3.05	1.92	0.000749	0.00585	3	3	51	30.01	12.95	6.93	13.58	4.26	+	+	+	+	+	+
chr2L	3825323	3825823	501	*	5.95	5.23	6.42	-1.19	0.000749	0.00585	2	3	21	48.02	43.83	71.58	93.92	91.51	-	+	+	+	+	+	slp1
chrX	4081419	4081919	501	*	4.37	4.99	3.27	1.72	0.000754	0.00588	3	3	46	32.68	16.44	6.93	14.71	7.3	+	+	+	+	+	+	CG43689
chrX	20352351	20352851	501	*	4.44	5.09	3.22	1.87	0.000755	0.00588	3	3	65	24.67	12.45	8.72	9.05	10.15	+	+	+	+	+	+
chr3L	15516843	15517343	501	*	3.24	1.64	3.98	-2.35	0.000758	0.00589	0	2	3	3.33	2.99	11.41	19.24	16.84	-	-	-	-	+	+	CG13454
chrX	11714210	11714710	501	*	5.34	4.38	5.92	-1.54	0.000761	0.00591	2	3	7	18.01	37.36	46.53	70.15	64.52	-	+	+	+	+	+	Amun
chr3L	22402774	22403274	501	*	6.4	5.78	6.83	-1.04	0.000763	0.00591	2	3	42	60.02	63.26	113.86	103.35	123.57	-	+	+	+	+	+	Ten-m
chr2R	13191662	13192162	501	*	4.38	3.33	4.98	-1.65	0.000766	0.00593	0	3	6	10.67	13.45	29.75	39.98	24.96	-	-	-	+	+	+	seq
chrX	14037608	14038526	919	*	5.37	4.64	5.85	-1.2	0.000773	0.00598	0	3	15	32.01	27.89	56.82	62.61	53.16	-	-	-	+	+	+
chr2L	17748674	17749174	501	*	4.35	3.4	4.92	-1.53	0.000781	0.00602	0	3	9	10.67	11.95	27.96	28.67	34.49	-	-	-	+	+	+	CadN
chrX	15986645	15987145	501	*	4.69	3.6	5.3	-1.7	0.000781	0.00602	1	3	4	10	22.42	39.59	38.47	40.18	-	-	+	+	+	+	ND-20
chr3L	11324520	11325020	501	*	4.69	3.76	5.24	-1.49	0.00079	0.00608	0	3	18	8.67	13.95	31.54	52.8	29.42	-	-	-	+	+	+	CG6168
chr3R	17394390	17394890	501	*	4.08	2.98	4.7	-1.72	0.000792	0.00608	0	3	10	8.67	4.98	19.24	26.78	31.86	-	-	-	+	+	+	CREG
chr3L	11251915	11252415	501	*	6.25	5.68	6.67	-0.99	0.000815	0.00626	2	3	48	56.02	49.31	90.37	111.27	103.08	-	+	+	+	+	+	scyl
chr3L	7435208	7435708	501	*	3.89	2.65	4.55	-1.9	0.000823	0.00631	0	3	4	7.34	7.47	16.11	24.89	29.22	-	-	-	+	+	+	Rac2
chr2L	1068237	1068737	501	*	4.36	3.43	4.92	-1.49	0.000826	0.00631	0	2	11	9.34	11.95	30.2	29.04	31.45	-	-	-	+	-	+	S
chrX	10794203	10794703	501	*	3.37	1.73	4.12	-2.39	0.000826	0.00631	0	2	2	2	5.98	14.09	16.22	21.91	-	-	-	+	-	+	FBgn0266731
chr3L	23339000	23339500	501	*	3.45	1.87	4.18	-2.31	0.000829	0.00632	0	3	1	4	5.98	15.88	16.97	21.71	-	-	-	+	+	+	alpha-Cat
chr2L	19571672	19572172	501	*	5.05	4.32	5.54	-1.22	0.00083	0.00632	0	3	16	20.01	23.91	47.65	49.41	42.41	-	-	-	+	+	+	spi
chrX	13111853	13112353	501	*	4.73	3.79	5.29	-1.5	0.000833	0.00634	1	3	7	14	20.42	33.33	44.13	39.97	-	-	+	+	+	+	CG42237
chr3R	29774497	29774997	501	*	5.22	4.49	5.7	-1.21	0.00084	0.00638	2	3	24	16.67	26.9	40.71	59.22	56	+	-	+	+	+	+	kay
chrX	1233835	1234335	501	*	4.62	3.64	5.2	-1.56	0.000841	0.00638	0	3	8	10	19.43	36.24	44.88	29.42	-	-	-	+	+	+	CG3638
chr2R	6871975	6872968	994	*	4.68	3.81	5.22	-1.41	0.000849	0.00643	0	3	10	14	17.93	33.11	35.45	43.02	-	-	-	+	+	+	FBgn0265058
chr3L	9816158	9816658	501	*	1.57	2.5	-1.9	4.4	0.00085	0.00643	3	3	10	4	2.99	0.22	0.38	0.2	+	+	+	+	+	+	CG43897
chr3L	6742016	6742516	501	*	4.89	4.08	5.41	-1.33	0.000851	0.00643	1	3	11	19.34	20.42	37.8	48.28	41.6	-	-	+	+	+	+	dikar
chr3R	22106365	22106865	501	*	2.27	3.13	-0.23	3.37	0.000855	0.00644	2	0	14	5.34	6.97	1.57	0.38	0.61	+	-	+	-	-	-
chr3R	2111269	2111769	501	*	3.61	2.29	4.29	-2.01	0.000856	0.00644	0	3	6	2.67	5.98	17.67	16.97	24.15	-	-	-	+	+	+	Myo81F
chr3R	21606721	21607221	501	*	6.21	5.46	6.7	-1.24	0.000864	0.00649	2	3	23	54.68	54.29	86.34	133.52	91.51	-	+	+	+	+	+	InR
chr2R	5653381	5653881	501	*	4.46	3.26	5.1	-1.84	0.000865	0.00649	0	3	5	19.34	4.48	23.93	36.21	43.02	-	-	-	+	+	+	CG1344
chr3L	5993822	5994322	501	*	3.72	2.35	4.41	-2.06	0.000889	0.00666	0	2	2	5.34	7.97	18.12	19.61	26.17	-	-	-	+	-	+	PVRAP
chrX	5746822	5747322	501	*	4.6	3.51	5.21	-1.7	0.000892	0.00667	1	3	4	11.34	18.93	43.17	41.49	26.58	-	-	+	+	+	+	CG4078
chr2R	9278744	9279244	501	*	3.2	1.41	3.98	-2.56	0.000906	0.00677	0	3	1	2	4.98	12.75	16.22	18.26	-	-	-	+	+	+	Pkn
chr3L	640290	640790	501	*	5.54	4.8	6.02	-1.22	0.000916	0.00683	2	3	14	34.68	34.87	63.53	70.91	60.26	-	+	+	+	+	+	FBgn0262451
chr2R	19418893	19419393	501	*	2.93	0.96	3.73	-2.77	0.000922	0.00687	0	2	1	3.33	1.49	14.99	15.09	9.74	-	-	-	+	+	-	hts
chrX	20999024	20999524	501	*	4.19	4.85	2.94	1.91	0.000923	0.00687	3	3	51	20.01	15.44	5.14	12.82	5.07	+	+	+	+	+	+
chr2L	21142863	21143363	501	*	4.56	3.71	5.1	-1.39	0.000927	0.00688	1	3	17	9.34	12.95	31.32	35.83	35.51	-	-	+	+	+	+	Dap160
chr3R	14654322	14654822	501	*	3.25	1.58	4	-2.41	0.000929	0.00689	0	2	6	2	1	12.3	23.01	12.58	-	-	-	+	+	-	CG3505
chr3R	8697739	8698239	501	*	4.58	3.62	5.15	-1.52	0.000932	0.0069	0	3	16	14	6.97	25.5	48.28	32.46	-	-	-	+	+	+	hb
chrX	7169176	7169676	501	*	3.4	1.83	4.14	-2.31	0.000941	0.00696	0	2	1	4.67	4.98	19.91	12.82	20.09	-	-	-	+	-	+	CG9650
chr4	1123788	1124288	501	*	4.19	2.94	4.85	-1.92	0.000944	0.00697	0	3	3	8	11.95	16.33	35.83	34.49	-	-	-	+	+	+	Arf102F
chr2R	21579599	21580099	501	*	5.35	4.65	5.81	-1.17	0.000949	0.00699	1	3	17	29.34	28.89	63.98	47.52	57.22	-	-	+	+	+	+
chr3L	6789663	6790163	501	*	4.18	2.82	4.87	-2.06	0.000951	0.007	0	2	8	0.67	12.45	27.51	37.34	23.13	-	-	-	+	+	-	vvl
chr2R	6632251	6632751	501	*	3.82	2.6	4.47	-1.88	0.000956	0.00702	0	3	8	2.67	7.47	19.68	20.37	26.58	-	-	-	+	+	+	Vha16-1
chr3L	14276023	14276523	501	*	5.17	4.38	5.68	-1.3	0.000956	0.00702	1	3	13	20.01	29.39	42.73	61.86	48.7	-	-	+	+	+	+	fz
chr2L	15478148	15478648	501	*	5.16	4.44	5.64	-1.2	0.000963	0.00706	1	3	16	20.67	28.39	48.76	46.77	54.18	-	-	+	+	+	+	sna
chr3R	8413832	8414332	501	*	2.09	3.01	-1.09	4.1	0.000975	0.00714	3	3	17	6.67	0.5	0.45	0.75	0.2	+	+	+	+	+	+	CG45263
chr2L	22131088	22131588	501	*	3.17	1.15	3.99	-2.84	0.000984	0.00719	0	2	1	0.67	4.98	8.5	17.73	21.31	-	-	-	-	+	+	CycK
chr3L	19891028	19891528	501	*	3.94	2.76	4.58	-1.82	0.000994	0.00725	0	2	6	5.34	8.97	16.55	26.78	28.41	-	-	-	+	-	+	Su(Tpl)
chr2R	11831068	11831568	501	*	1.73	2.68	-1.9	4.58	0.000995	0.00725	1	1	6	12.67	0.5	0.22	0.38	0.2	+	-	-	-	+	-	Sobp
chr3L	1861118	1861618	501	*	4.94	4.22	5.42	-1.2	0.000996	0.00725	0	3	20	16.67	19.43	44.96	38.09	45.45	-	-	-	+	+	+	Rap1
chr2L	2861284	2861784	501	*	5.34	5.88	4.47	1.41	0.001	0.00727	3	3	88	55.35	33.87	16.78	35.45	14.41	+	+	+	+	+	+	CG2991
chrX	8410257	8410757	501	*	5.07	4.1	5.65	-1.55	0.00101	0.0073	1	3	6	20.67	24.91	37.58	72.79	40.18	-	-	+	+	+	+	PIG-T
chr3R	21638387	21638887	501	*	4.22	3.25	4.79	-1.53	0.00101	0.0073	0	3	9	10.67	8.97	26.4	28.29	28.2	-	-	-	+	+	+	E2f1
chrX	23211582	23212574	993	*	3.05	3.79	1.48	2.3	0.00101	0.0073	3	3	15	14	12.45	4.25	1.51	2.64	+	+	+	+	+	+	FBgn0085813
chr3R	26026683	26027183	501	*	4.09	2.77	4.76	-1.99	0.00101	0.0073	0	3	1	8	11.46	21.03	27.91	32.46	-	-	-	+	+	+	E(spl)m4-BFM
chr3R	16630814	16631314	501	*	4.27	3.18	4.89	-1.71	0.00102	0.00733	0	2	8	4.67	14.45	34.67	29.42	24.75	-	-	-	+	-	+	Fas1
chrX	3777118	3777618	501	*	4.62	3.56	5.23	-1.67	0.00102	0.00734	0	3	14	3.33	17.93	27.51	43.37	41.6	-	-	-	+	+	+	FBgn0263532
chr3R	14853628	14854128	501	*	4.74	3.69	5.35	-1.66	0.00102	0.00734	0	3	3	16.67	18.93	29.53	48.66	44.03	-	-	-	+	+	+	btsz
chr2R	24275436	24275936	501	*	5.27	4.5	5.77	-1.27	0.00102	0.00735	0	3	23	14	30.88	69.34	52.43	42	-	-	-	+	+	+	nvy
chr2L	23175963	23176463	501	*	4.39	3.27	5.01	-1.74	0.00103	0.00738	0	3	8	4	16.94	27.29	32.44	36.93	-	-	-	+	+	+	CG12567
chrX	2305741	2306241	501	*	5	4.21	5.51	-1.31	0.00103	0.00738	0	3	14	24.01	17.43	33.11	57.33	46.67	-	-	-	+	+	+	Raf
chr2R	17893011	17893511	501	*	4.13	3.14	4.71	-1.57	0.00103	0.00739	0	2	10	8	8.47	23.93	26.4	28.2	-	-	-	+	-	+	Elk
chr3R	8334902	8335402	501	*	4.82	3.92	5.38	-1.46	0.00104	0.00742	0	3	9	15.34	20.92	54.8	28.29	41.6	-	-	-	+	+	+	Poxm
chr2R	10077998	10078498	501	*	4.53	3.61	5.09	-1.48	0.00104	0.00743	0	3	9	18.67	8.97	34	35.83	32.06	-	-	-	+	+	+	CG1371
chr3L	18627755	18628255	501	*	3.81	2.51	4.48	-1.97	0.00106	0.00757	0	3	5	2.67	9.46	20.13	19.99	26.78	-	-	-	+	+	+	MYPT-75D
chrX	4677439	4677939	501	*	3.27	1.76	3.99	-2.23	0.00107	0.00758	0	3	4	2.67	3.49	12.97	20.37	14.2	-	-	-	+	+	+	fzr
chr2R	10100790	10101290	501	*	4	2.69	4.68	-1.99	0.00107	0.00758	0	2	1	9.34	8.97	26.84	30.55	19.28	-	-	-	+	+	-	14-3-3zeta
chrX	10808639	10809139	501	*	4.56	3.38	5.19	-1.81	0.00108	0.00764	0	3	2	9.34	19.92	30.2	41.49	38.15	-	-	-	+	+	+	Imp
chr3R	24590238	24590738	501	*	2.45	-0.08	3.32	-3.4	0.00108	0.00764	0	3	1	1.33	0.5	10.51	11.32	8.12	-	-	-	+	+	+	mld
chrX	11266249	11266749	501	*	2.13	3	-0.36	3.36	0.00108	0.00764	3	1	12	4	7.97	0.22	1.51	0.61	+	+	+	-	+	-	CG44422
chr2R	16580499	16580999	501	*	3.98	2.88	4.59	-1.71	0.00108	0.00767	0	2	6	10.67	5.48	25.28	23.01	24.15	-	-	-	+	-	+	Cdk4
chr2L	4030170	4030670	501	*	4.56	3.67	5.1	-1.43	0.0011	0.0078	0	3	8	15.34	14.94	34.45	31.68	36.93	-	-	-	+	+	+	ed
chrX	616881	617381	501	*	3.72	2.25	4.43	-2.18	0.00111	0.00783	0	2	1	5.34	7.97	15.21	30.55	19.07	-	-	-	+	+	-	CG13366
chr2L	8276159	8276659	501	*	4.41	3.24	5.05	-1.81	0.00111	0.00783	0	3	1	15.34	11.95	35.34	31.68	32.46	-	-	-	+	+	+	Btk29A
chr3L	9855613	9856113	501	*	4.57	3.42	5.2	-1.78	0.00112	0.00785	1	3	10	2.67	19.43	31.99	31.31	46.67	-	-	+	+	+	+	RasGAP1
chr2L	21039698	21040198	501	*	4.06	2.73	4.74	-2	0.00112	0.00789	0	3	1	10	8.97	17.45	34.32	28.2	-	-	-	+	+	+	CG42238
chrX	12663344	12663844	501	*	3.99	2.93	4.59	-1.67	0.00113	0.00793	0	3	6	9.34	7.47	25.28	22.25	24.96	-	-	-	+	+	+	Tis11
chr2L	6339136	6339636	501	*	3.66	2.21	4.38	-2.17	0.00113	0.00794	0	2	8	5.34	0.5	22.82	25.65	13.8	-	-	-	+	+	-	Cpr
chrX	10802081	10802581	501	*	3.94	2.48	4.65	-2.17	0.00114	0.00794	0	3	1	3.33	12.45	22.15	27.16	26.17	-	-	-	+	+	+	Imp
chrX	11792604	11793104	501	*	4.44	3.51	5	-1.49	0.00114	0.00794	1	3	11	8.67	14.45	25.95	39.23	30.84	-	-	+	+	+	+	CkIIbeta
chr3L	17563208	17563708	501	*	5.84	6.37	4.99	1.38	0.00114	0.00794	3	2	140	52.02	55.29	28.19	46.39	20.7	+	+	+	+	-	+	Eip74EF
chr2L	19363567	19364067	501	*	5.97	5.2	6.47	-1.26	0.00114	0.00794	1	3	19	33.34	58.28	70.69	97.69	96.79	-	-	+	+	+	+	dnt
chr3R	5264620	5265120	501	*	3.26	1.69	4	-2.31	0.00114	0.00795	0	2	5	0.67	3.98	13.65	17.73	16.64	-	-	-	+	+	-	Tim17a2
chr2L	15731619	15732119	501	*	5.42	4.8	5.86	-1.06	0.00115	0.00796	1	3	24	30.01	29.39	57.49	50.54	66.15	-	-	+	+	+	+	CycE
chr3L	21749129	21749629	501	*	3.71	4.47	1.98	2.49	0.00115	0.00799	3	2	38	14	14.45	4.47	7.17	0.2	+	+	+	+	+	-	Syn1
chr3L	21010893	21011393	501	*	3.57	2.34	4.23	-1.89	0.00116	0.008	0	3	7	4.67	3.49	18.12	21.12	17.04	-	-	-	+	+	+	skd
chr2L	2885902	2886402	501	*	4.64	3.78	5.18	-1.39	0.00116	0.00801	1	3	11	11.34	18.93	34.9	39.6	33.89	-	-	+	+	+	+	NTPase
chrX	4480960	4481460	501	*	2.62	3.4	0.81	2.59	0.00116	0.00801	3	1	11	12.67	7.97	1.34	1.89	2.03	+	+	+	-	+	-	bi
chr2L	17754040	17754540	501	*	4.65	3.86	5.16	-1.3	0.00119	0.00822	0	3	16	12	15.44	36.91	31.68	38.55	-	-	-	+	+	+	CadN
chr2R	12996959	12997459	501	*	4.7	3.91	5.2	-1.3	0.0012	0.00828	0	3	14	18.01	12.95	33.33	41.49	35.71	-	-	-	+	+	+	Su(z)2
chr3L	27858116	27858616	501	*	4.85	3.94	5.41	-1.47	0.00122	0.00839	0	3	15	10	20.92	23.93	49.79	53.77	-	-	-	+	+	+	eIF4B
chr3L	7370472	7370972	501	*	4.64	3.67	5.22	-1.55	0.00122	0.00839	1	3	7	12.67	18.43	28.19	52.05	31.45	-	-	+	+	+	+	Sh3beta
chrX	12715858	12716358	501	*	5.74	4.99	6.23	-1.24	0.00122	0.0084	1	3	14	38.01	43.34	83.88	62.61	78.73	-	-	+	+	+	+	Smr
chr2R	4828947	4829447	501	*	4.72	3.52	5.36	-1.84	0.00123	0.00843	1	3	2	8	24.41	31.99	44.51	47.07	-	-	+	+	+	+	CG14464
chrX	16500490	16500990	501	*	5.88	6.44	4.94	1.5	0.00123	0.00844	3	3	140	86.03	34.87	25.5	49.41	17.25	+	+	+	+	+	+	para
chr3R	21605273	21605773	501	*	6.38	5.8	6.79	-1	0.00124	0.00844	3	3	64	44.01	58.78	93.5	118.81	120.12	+	+	+	+	+	+	InR
chr2R	15132356	15132856	501	*	5.49	4.69	6	-1.31	0.00124	0.00845	1	3	12	26.01	39.35	59.73	79.96	51.94	-	-	+	+	+	+	chn
chrX	12574795	12575295	501	*	4.72	3.76	5.29	-1.53	0.00124	0.00846	0	3	6	16.67	17.93	27.74	37.34	51.94	-	-	-	+	+	+	Pits
chr2R	13555611	13556111	501	*	4.74	3.93	5.26	-1.33	0.00125	0.0085	0	3	10	16.67	18.93	38.25	34.7	42	-	-	-	+	+	+	link
chr3R	16882353	16882853	501	*	4.63	3.74	5.18	-1.44	0.00125	0.00851	0	3	16	6.67	17.43	33.33	41.49	33.68	-	-	-	+	+	+	FBgn0264857
chr2R	21702837	21703337	501	*	5.94	5.29	6.39	-1.11	0.00128	0.00868	2	3	23	48.68	45.33	79.63	95.8	76.5	-	+	+	+	+	+	HmgD
chr3R	16071967	16072467	501	*	5.15	4.33	5.67	-1.34	0.00128	0.00868	2	3	10	29.34	20.92	37.13	51.3	64.32	-	+	+	+	+	+	Mhcl
chr3R	1815693	1816193	501	*	4.03	2.71	4.71	-2	0.00129	0.00869	2	3	1	6.67	11.95	26.84	30.93	20.7	-	+	+	+	+	+	Myo81F
chr2L	18936048	18936548	501	*	3.66	2.02	4.41	-2.39	0.00129	0.00869	0	2	11	0.67	0.5	15.66	28.67	19.28	-	-	-	+	+	-	ssp3
chr3R	25094533	25095033	501	*	3.18	1.38	3.95	-2.57	0.00129	0.00871	0	2	1	1.33	5.48	13.65	14.71	18.06	-	-	-	+	-	+	fd96Cb
chr3R	16423246	16423746	501	*	3.81	2.62	4.45	-1.83	0.0013	0.00873	0	2	4	8	6.48	17	26.4	22.12	-	-	-	+	-	+
chr2R	18673259	18673759	501	*	3.82	2.53	4.5	-1.97	0.0013	0.00877	0	3	7	3.33	6.97	11.86	33.95	21.91	-	-	-	+	+	+	edl
chrX	12666149	12666649	501	*	4.51	3.33	5.15	-1.81	0.0013	0.00877	0	3	10	3.33	16.94	18.79	50.54	36.93	-	-	-	+	+	+	Tis11
chrX	10325302	10325802	501	*	4.19	3.06	4.82	-1.76	0.00132	0.00888	0	3	3	10	11.95	21.92	35.83	26.99	-	-	-	+	+	+	CG2909
chrX	4678022	4678522	501	*	3.3	1.76	4.03	-2.27	0.00133	0.00891	0	2	5	0.67	4.48	14.32	19.24	15.42	-	-	-	+	-	+	fzr
chr3R	6903442	6903942	501	*	4.02	2.7	4.69	-1.99	0.00133	0.00891	0	2	7	8	4.48	8.72	38.47	30.44	-	-	-	-	+	+	Antp
chrX	19772233	19772733	501	*	4.78	3.83	5.34	-1.51	0.00134	0.00895	0	3	6	23.34	13.45	29.3	46.02	46.26	-	-	-	+	+	+	zld
chr2R	11799939	11800439	501	*	3.44	1.96	4.15	-2.2	0.00135	0.00903	0	2	5	0.67	5.98	18.57	17.73	17.04	-	-	-	+	-	+	ths
chr2R	5663496	5663996	501	*	4.38	3.44	4.95	-1.5	0.00136	0.00904	0	3	8	10.67	13.95	28.19	26.02	38.35	-	-	-	+	+	+	Not3
chr2L	17263317	17263817	501	*	4.4	3.37	5	-1.63	0.00136	0.00904	0	3	7	6	17.93	31.76	32.81	31.45	-	-	-	+	+	+	beat-IIIc
chrX	18397795	18398295	501	*	1.64	2.57	-1.9	4.47	0.00136	0.00907	3	3	10	7.34	0.5	0.22	0.38	0.2	+	+	+	+	+	+	CG32549
chr3L	19791659	19792159	501	*	4.44	3.58	4.97	-1.39	0.00137	0.0091	0	3	12	14	9.96	28.63	30.17	35.31	-	-	-	+	+	+	SREBP
chr2L	20428709	20429209	501	*	3.8	2.44	4.48	-2.04	0.00137	0.0091	0	2	3	11.34	1.99	22.37	19.24	25.36	-	-	-	+	-	+	CG31688
chrX	1134372	1134872	501	*	4.96	4.2	5.46	-1.26	0.00138	0.00916	1	3	13	16.67	25.4	38.92	44.88	48.49	-	-	+	+	+	+	CG3655
chr3L	1592729	1593229	501	*	4.09	3.04	4.69	-1.65	0.00139	0.00919	0	3	7	6.67	10.96	22.37	22.63	32.46	-	-	-	+	+	+	CG13917
chr3R	17558755	17559255	501	*	5.31	4.69	5.74	-1.05	0.0014	0.00924	0	3	23	28.68	25.9	49.88	54.69	55.8	-	-	-	+	+	+	Hmx
chr2L	10403846	10404346	501	*	3.15	1.25	3.94	-2.69	0.00142	0.00936	0	2	1	0.67	5.48	12.3	13.58	20.29	-	-	-	+	-	+	CG17768
chr3R	22309031	22309531	501	*	3.14	3.95	1.06	2.89	0.00144	0.00951	3	3	33	8	5.48	3.8	2.26	0.2	+	+	+	+	+	+	CG34377
chrX	8922495	8922995	501	*	4.36	4.99	3.21	1.78	0.00146	0.00958	3	3	51	28.01	16.44	7.83	15.84	4.06	+	+	+	+	+	+	CG12661
chr2L	708134	708634	501	*	2.96	1.15	3.74	-2.59	0.00146	0.00958	0	2	1	2.67	2.99	12.75	10.18	17.25	-	-	-	+	-	+	FBgn0266323
chr2L	7526160	7526660	501	*	4.91	4.16	5.39	-1.23	0.00147	0.00966	2	3	14	24.67	14.94	43.84	37.72	44.64	-	+	+	+	+	+	RapGAP1
chr2L	18895301	18895801	501	*	4.92	3.96	5.49	-1.53	0.00147	0.00966	1	3	4	25.34	17.43	56.37	37.34	41.19	-	+	-	+	+	+	FBgn0265950
chr2L	21657389	21657889	501	*	2.68	0.47	3.52	-3.05	0.00148	0.00967	0	2	1	0.67	2.49	8.05	12.07	14.2	-	-	-	+	-	+	Cul2
chr2R	13337178	13337678	501	*	4.12	3	4.75	-1.75	0.00148	0.00967	0	2	6	6	11.95	16.78	30.55	33.28	-	-	-	+	-	+	FBgn0265104
chr3L	130989	131489	501	*	6.49	5.91	6.9	-0.98	0.00149	0.00971	3	3	50	62.02	68.74	101.56	135.03	120.93	+	+	+	+	+	+	Pdk1
chrX	1955341	1955841	501	*	4.17	4.86	2.81	2.05	0.00149	0.00972	2	1	50	21.34	15.94	9.84	9.81	1.42	+	+	-	+	-	-	Hr4
chrX	12482799	12483299	501	*	4.01	4.63	2.92	1.71	0.00149	0.00972	3	3	38	22.67	13.45	7.16	9.81	5.68	+	+	+	+	+	+
chr2R	10496031	10496531	501	*	5.55	6.12	4.61	1.51	0.00149	0.00972	3	3	121	47.35	40.35	13.2	43	16.84	+	+	+	+	+	+	lola
chr2L	8845929	8846429	501	*	3.72	2.6	4.34	-1.74	0.0015	0.00975	0	2	6	6.67	5.48	19.46	19.24	22.12	-	-	-	+	-	+
chr2L	23174439	23174939	501	*	4.34	3	5.02	-2.03	0.0015	0.00975	0	3	1	6	16.94	19.46	41.49	36.52	-	-	-	+	+	+	CG12567
chrX	21261634	21262134	501	*	2.14	3.03	-0.63	3.66	0.00151	0.00975	2	3	18	2	4.48	0.22	1.51	0.2	+	-	+	+	+	+	CG32521
chr4	1230515	1231015	501	*	4.09	2.86	4.74	-1.88	0.00151	0.00975	0	2	1	11.34	9.46	22.59	30.17	27.39	-	-	-	+	-	+	Dyrk3
chrX	17828602	17829102	501	*	3.57	2.13	4.27	-2.14	0.00151	0.00979	0	3	1	6.67	5.48	12.53	23.01	22.52	-	-	-	+	+	+	Socs16D
chrX	20575389	20575889	501	*	6.72	7.28	5.79	1.48	0.00152	0.0098	3	3	282	98.03	85.18	43.84	87.13	35.51	+	+	+	+	+	+
chrX	5461820	5462320	501	*	6.52	7.08	5.58	1.49	0.00152	0.0098	3	3	225	114.7	65.25	32.66	82.98	28.2	+	+	+	+	+	+	SPR
chr3L	1463484	1463984	501	*	6.68	6.07	7.11	-1.04	0.00152	0.0098	2	3	46	72.02	83.19	144.73	127.11	141.22	-	+	+	+	+	+	rho
chr2L	22168992	22169492	501	*	4.79	3.88	5.35	-1.46	0.00152	0.0098	1	3	10	13.34	20.92	23.93	46.02	52.15	-	-	+	+	+	+	Clamp
chr3L	10776888	10777388	501	*	3.51	4.29	1.7	2.59	0.00153	0.00984	2	0	35	12.67	10.96	2.01	7.54	0.2	+	-	+	-	-	-
chr3L	15250399	15250899	501	*	4.42	5.04	3.32	1.71	0.00154	0.00989	2	2	52	26.68	19.92	6.26	18.1	5.68	+	+	-	+	+	-
chr3R	5086575	5087075	501	*	5.66	5.04	6.09	-1.05	0.00155	0.00993	1	3	26	29.34	43.34	64.2	73.17	66.55	-	-	+	+	+	+	corto
chr2R	8245842	8246342	501	*	5.13	4.32	5.64	-1.33	0.00156	0.01	2	3	9	21.34	29.39	40.94	50.54	58.44	-	+	+	+	+	+	FBgn0265638
chr3L	4232129	4232629	501	*	4.54	3.56	5.12	-1.57	0.00156	0.01	1	3	5	11.34	18.93	28.41	35.08	40.99	-	-	+	+	+	+	ImpL2
chr3R	6848515	6849015	501	*	3.69	2.32	4.38	-2.05	0.0016	0.0102	0	3	2	10	2.99	14.99	21.5	25.77	-	-	-	+	+	+	Scr
chrX	409330	409830	501	*	5.64	4.96	6.1	-1.14	0.00161	0.0102	2	3	17	37.35	38.85	57.04	75.06	73.45	-	+	+	+	+	+	l(1)sc
chrX	5818647	5819147	501	*	3.5	4.2	2.1	2.1	0.00162	0.0103	2	0	35	10.67	9.46	4.7	5.28	2.84	+	-	+	-	-	-	AgmNAT
chrX	5291324	5291824	501	*	1.75	2.66	-1.35	4.01	0.00162	0.0103	2	0	12	6	1	0.22	0.75	0.2	+	+	-	-	-	-
chrX	15760529	15761029	501	*	3.93	2.85	4.54	-1.69	0.00163	0.0103	0	3	5	8.67	7.97	19.68	21.5	28.81	-	-	-	+	+	+	Graf
chrX	2137333	2137833	501	*	4.83	4.03	5.35	-1.32	0.00163	0.0103	2	3	9	24.01	15.94	37.58	42.62	42	-	+	+	+	+	+	ph-p
chr2L	7545361	7545861	501	*	3.43	1.89	4.16	-2.26	0.00163	0.0104	0	2	8	0.67	2.49	9.4	24.52	19.68	-	-	-	-	+	+	RapGAP1
chrX	7175254	7175754	501	*	5.63	6.19	4.69	1.5	0.00166	0.0105	3	3	131	47.35	41.34	17.67	44.88	15.02	+	+	+	+	+	+	CG9650
chr2L	10366419	10366919	501	*	4.39	3.2	5.04	-1.83	0.00167	0.0105	1	3	1	10.67	15.94	24.83	33.57	39.97	-	-	+	+	+	+	CG5056
chr3L	1366832	1367332	501	*	6.03	5.27	6.53	-1.26	0.00167	0.0105	2	3	15	46.68	54.29	74.71	100.33	101.86	-	+	+	+	+	+	Ptp61F
chr3R	22854780	22855280	501	*	2.41	3.27	-0.08	3.36	0.00168	0.0106	1	1	17	8	3.98	0.22	0.38	2.23	+	-	-	-	+	-	FBgn0264428
chr3R	9034043	9034543	501	*	4.71	3.96	5.2	-1.24	0.00168	0.0106	1	3	15	14.67	16.94	32.21	37.72	40.38	-	+	-	+	+	+	neur
chr3R	8659371	8659871	501	*	3.88	2.61	4.54	-1.93	0.00168	0.0106	0	2	2	11.34	4.98	16.78	23.01	30.03	-	-	-	+	-	+	bel
chr2R	11565487	11565987	501	*	3.29	1.61	4.05	-2.44	0.00168	0.0106	0	2	8	0.67	0.5	10.74	18.48	20.49	-	-	-	+	-	+
chr3L	2868666	2869166	501	*	3.47	2.02	4.18	-2.16	0.00168	0.0106	0	2	7	4.67	0.5	12.53	19.99	21.91	-	-	-	+	-	+	Tet
chr3L	9134257	9134757	501	*	2.93	1.11	3.71	-2.59	0.00169	0.0106	0	2	1	2	3.49	14.76	12.45	11.97	-	-	-	+	-	+	bol
chr3R	10593908	10594408	501	*	3.45	2.17	4.11	-1.94	0.00171	0.0107	0	2	7	4	2.49	17.67	13.58	20.7	-	-	-	+	+	-	hth
chr3R	14649344	14649844	501	*	4.91	4.08	5.43	-1.35	0.00171	0.0107	0	3	9	25.34	16.44	40.04	54.69	34.9	-	-	-	+	+	+	l(3)L1231
chr2R	22397659	22398159	501	*	4.01	2.82	4.65	-1.83	0.00172	0.0107	0	2	2	10.67	8.47	18.57	25.27	31.45	-	-	-	-	+	+	babos
chr2L	3606367	3606867	501	*	6.23	5.6	6.66	-1.06	0.00172	0.0108	2	3	29	62.02	54.79	104.02	106.36	93.34	-	+	+	+	+	+	odd
chrX	12096733	12097233	501	*	1.3	2.22	-1.9	4.12	0.00173	0.0108	2	1	3	6	4.98	0.22	0.38	0.2	+	-	+	-	+	-	FBgn0264675
chrX	9496024	9496524	501	*	4.99	4.25	5.47	-1.23	0.00173	0.0108	1	3	18	26.01	12.95	40.04	54.31	38.96	-	+	-	+	+	+	mgl
chr2R	24062232	24062732	501	*	4.76	3.87	5.31	-1.44	0.00174	0.0108	0	3	10	20.01	13.95	22.59	45.64	50.73	-	-	-	+	+	+	RpL39
chr3R	23315137	23315637	501	*	5.15	4.41	5.64	-1.22	0.00176	0.0109	1	3	14	20.01	29.89	39.15	57.33	52.76	-	-	+	+	+	+	pnt
chr2L	19356961	19357461	501	*	7.45	8.03	6.48	1.55	0.00176	0.0109	3	3	378	260.75	145.95	70.91	158.41	37.74	+	+	+	+	+	+	dnt
chr3L	16773067	16773567	501	*	5.76	5.15	6.19	-1.04	0.00176	0.0109	2	3	23	41.35	41.84	79.19	65.63	73.86	-	+	+	+	+	+	Nrt
chr3R	10614357	10614857	501	*	4.48	3.28	5.13	-1.85	0.00177	0.011	0	3	2	6.67	20.42	25.72	42.62	36.73	-	-	-	+	+	+	hth
chr2R	19011882	19012382	501	*	4.36	4.99	3.21	1.77	0.00178	0.011	3	2	54	24.67	16.44	10.96	13.2	3.65	+	+	+	+	+	-
chr2L	16276918	16277418	501	*	3.23	1.61	3.97	-2.36	0.0018	0.0111	0	2	1	6.67	1.49	17	15.09	15.02	-	-	-	+	-	+	crp
chr2R	23593875	23594375	501	*	5.7	6.25	4.83	1.42	0.0018	0.0111	3	3	119	62.02	46.82	20.13	50.54	14.41	+	+	+	+	+	+	apt
chr2R	18611538	18612038	501	*	4.48	3.23	5.13	-1.91	0.00181	0.0111	1	3	1	6.67	20.42	29.3	40.36	35.71	-	-	+	+	+	+	CG10927
chr2R	15899048	15899548	501	*	4.53	3.65	5.07	-1.42	0.00181	0.0111	0	3	9	10.67	17.93	28.63	38.47	33.68	-	-	-	+	+	+	CG33463
chr3L	15043901	15044401	501	*	5.52	4.86	5.97	-1.12	0.00182	0.0112	2	3	16	34.01	36.86	64.2	57.71	66.76	-	+	+	+	+	+	ind
chr2R	22934234	22934734	501	*	4.17	3.03	4.79	-1.77	0.00182	0.0112	0	3	10	2	12.45	34.45	23.38	25.36	-	-	-	+	+	+	CG3788
chr2R	8652434	8652934	501	*	2.65	0.64	3.46	-2.83	0.00185	0.0113	1	2	3	0.67	1	15.43	10.18	7.51	+	-	-	+	-	+	ptc
chrX	5052785	5053285	501	*	5.88	5.15	6.36	-1.2	0.00185	0.0113	2	3	18	48.02	40.85	57.26	104.48	84.41	-	+	+	+	+	+	ovo
chrX	3837769	3838269	501	*	5.04	4.14	5.59	-1.45	0.00186	0.0114	1	3	6	16.67	30.39	42.05	56.58	45.86	-	-	+	+	+	+	ec
chr3R	25595507	25596007	501	*	3.97	2.71	4.63	-1.92	0.00188	0.0114	0	2	4	2.67	12.95	29.53	22.25	22.52	-	-	-	+	-	+	msi
chr3R	3846459	3846959	501	*	4.47	3.42	5.08	-1.66	0.0019	0.0116	1	3	3	10.67	18.43	27.51	39.23	34.49	-	-	+	+	+	+	CG41099
chr2L	4028767	4029267	501	*	5.19	4.5	5.65	-1.16	0.0019	0.0116	1	3	14	23.34	30.39	50.55	51.67	48.9	-	-	+	+	+	+	ed
chr3L	458722	459222	501	*	4.66	5.21	3.77	1.44	0.00191	0.0116	3	1	47	43.35	20.42	12.3	19.99	8.52	+	+	+	-	+	-	klar
chr3R	18546842	18547342	501	*	4.29	3.12	4.92	-1.8	0.00191	0.0116	1	3	1	10.67	14.45	28.63	34.7	27.8	-	-	+	+	+	+	fru
chrX	8421131	8421631	501	*	5.16	4.45	5.63	-1.17	0.00193	0.0117	1	3	26	15.34	24.41	44.96	64.87	38.35	+	-	-	+	+	+	Trf2
chr2R	23639015	23639515	501	*	5.36	4.72	5.81	-1.08	0.00195	0.0118	1	3	27	33.34	18.93	44.51	64.5	58.84	-	+	-	+	+	+	retn
chr3L	10516334	10516834	501	*	6.13	5.6	6.53	-0.93	0.00196	0.0119	2	3	49	57.35	38.85	90.15	90.9	95.37	-	+	+	+	+	+	Rbfox1
chrX	13214076	13214576	501	*	5.93	5.27	6.38	-1.12	0.00198	0.0119	2	3	23	45.35	47.32	60.84	99.95	89.89	-	+	+	+	+	+	mew
chr2R	13829103	13829603	501	*	3.43	2.04	4.13	-2.09	0.00198	0.012	0	3	3	7.34	1.99	12.75	22.25	17.45	-	-	-	+	+	+	CG6329
chr3L	20695165	20695665	501	*	4.91	4.1	5.42	-1.33	0.00198	0.012	3	3	18	12	21.42	25.95	53.18	49.71	+	+	+	+	+	+	kni
chr2L	3000418	3000918	501	*	4.75	3.95	5.27	-1.32	0.00201	0.0121	0	3	8	19.34	18.93	38.25	35.08	42.41	-	-	-	+	+	+	CG17265
chrX	7320705	7321205	501	*	5.78	5.09	6.25	-1.16	0.00201	0.0121	2	3	18	46.68	37.36	58.61	95.8	73.65	-	+	+	+	+	+	CG1677
chrX	11020629	11021129	501	*	3.83	4.47	2.66	1.81	0.00201	0.0121	3	3	36	18.01	12.45	5.82	9.43	3.65	+	+	+	+	+	+	CG42339
chr2R	18653897	18654397	501	*	2.62	0.47	3.45	-2.98	0.00204	0.0123	0	3	1	0.67	2.49	9.62	13.58	9.54	-	-	-	+	+	+	Ntan1
chr3R	19861140	19861640	501	*	4.41	3.38	5	-1.62	0.00205	0.0123	0	3	5	7.34	18.93	28.86	32.06	35.31	-	-	-	+	+	+	CG11447
chrX	10865488	10865988	501	*	3.48	1.9	4.21	-2.32	0.00206	0.0124	0	2	9	0.67	1.49	17.45	29.42	8.72	-	-	-	+	+	-	CG2186
chr3L	4976400	4976900	501	*	4.9	4.1	5.41	-1.31	0.00207	0.0124	0	3	15	12.67	23.91	47.2	51.67	29.02	-	-	-	+	+	+	Con
chr2L	6922127	6922627	501	*	4.53	3.67	5.06	-1.39	0.00208	0.0124	0	3	11	10.67	16.44	24.16	36.59	39.36	-	-	-	+	+	+	Hrb27C
chr3R	14468192	14468692	501	*	4.58	5.17	3.57	1.6	0.00211	0.0126	3	3	64	23.34	20.42	8.95	18.48	8.12	+	+	+	+	+	+	cv-c
chr2L	14443801	14444301	501	*	5.58	4.9	6.03	-1.13	0.00213	0.0127	2	3	23	21.34	45.33	57.04	64.5	75.08	-	+	+	+	+	+
chrX	17829285	17829785	501	*	5.68	4.94	6.17	-1.23	0.00213	0.0127	1	3	12	36.68	43.34	59.5	82.22	74.26	-	-	+	+	+	+	Socs16D
chr2L	19219808	19220308	501	*	4.66	3.76	5.21	-1.44	0.00213	0.0127	0	3	5	19.34	16.44	33.55	34.7	42.41	-	-	-	+	+	+
chr2L	7310203	7310703	501	*	4.19	3.18	4.77	-1.59	0.00214	0.0127	0	3	6	7.34	13.95	23.49	30.55	28	-	-	-	+	+	+	wg
chr3L	18398233	18398733	501	*	5.52	4.87	5.97	-1.1	0.00214	0.0127	1	3	28	36.68	22.91	42.05	69.78	75.68	-	+	-	+	+	+	rpr
chr3L	16183915	16184415	501	*	4.14	4.85	2.69	2.16	0.00214	0.0127	3	3	47	30.68	8.97	2.46	14.71	2.23	+	+	+	+	+	+
chr3L	11010238	11010738	501	*	5.35	4.54	5.87	-1.32	0.00214	0.0127	1	3	16	14.67	39.35	39.82	74.3	60.87	-	-	+	+	+	+	klu
chr2R	10596886	10597386	501	*	4.56	3.64	5.11	-1.47	0.00217	0.0128	0	3	22	6	9.46	27.29	46.39	30.23	-	-	-	+	+	+	psq
chrX	22681785	22682285	501	*	7.27	7.87	6.22	1.65	0.00218	0.0129	3	3	398	220.07	86.17	59.95	132.39	31.65	+	+	+	+	+	+	FBgn0266348
chr2R	16102409	16103336	928	*	5.39	4.78	5.81	-1.03	0.00219	0.0129	1	3	23	28.01	31.38	46.98	64.87	56.81	+	-	-	+	+	+	Rho1
chrX	10214081	10214581	501	*	3.67	4.38	2.21	2.16	0.0022	0.0129	2	0	43	7.34	11.95	2.01	6.41	5.48	+	-	+	-	-	-	ATPsyndelta
chr2L	2979068	2979568	501	*	3.84	2.66	4.48	-1.82	0.0022	0.013	0	3	4	8	6.97	13.42	32.06	21.51	-	-	-	+	+	+	CG9641
chr2L	12055800	12056300	501	*	4.17	3.22	4.74	-1.52	0.00222	0.0131	0	3	6	10	11.95	27.29	27.91	24.96	-	-	-	+	+	+	JhI-21
chr2R	20600661	20601161	501	*	4.44	3.63	4.96	-1.33	0.00222	0.0131	0	3	12	12.67	12.45	25.5	33.95	33.89	-	-	-	+	+	+	HnRNP-K
chr3L	4625908	4626408	501	*	5.27	4.49	5.77	-1.28	0.00224	0.0131	1	3	10	26.01	31.38	41.16	71.29	51.54	-	-	+	+	+	+	HDAC1
chr3L	4960337	4960837	501	*	1.4	2.32	-1.9	4.22	0.00225	0.0132	3	3	8	6	1	0.22	0.38	0.2	+	+	+	+	+	+	Con
chr3L	7772225	7772725	501	*	3.2	3.9	1.82	2.08	0.00225	0.0132	3	1	25	10.67	8.97	3.58	4.15	2.84	+	+	+	-	+	-	Clk
chrX	12258523	12259023	501	*	3.87	2.85	4.47	-1.62	0.00226	0.0132	1	2	7	6.67	7.97	18.12	24.89	23.33	-	-	+	+	-	+	Ten-a
chr2R	1264086	1264586	501	*	4.54	3.69	5.06	-1.37	0.00227	0.0133	1	3	11	11.34	16.44	26.17	43	31.25	-	-	+	+	+	+	CG40191
chrX	3860685	3861185	501	*	4.13	3.03	4.74	-1.72	0.00227	0.0133	0	3	5	8	11.46	41.38	17.35	21.71	-	-	-	+	+	+	FBgn0019661
chr3L	10578770	10579270	501	*	1.37	2.27	-1.55	3.82	0.00228	0.0133	2	2	4	6	4.48	0.45	0.38	0.2	+	+	-	+	-	+	Rbfox1
chrX	9749393	9749893	501	*	3.32	1.89	4.03	-2.13	0.00229	0.0133	2	3	8	0.67	2.49	13.2	18.1	17.65	+	-	+	+	+	+	Sp1
chr3R	29392695	29393195	501	*	1.56	2.49	-1.9	4.39	0.00229	0.0133	3	3	13	3.33	0.5	0.22	0.38	0.2	+	+	+	+	+	+	Ptp99A
chr3R	15242342	15242842	501	*	4.48	3.3	5.12	-1.82	0.00229	0.0133	1	3	1	10.67	17.93	22.59	35.83	45.86	-	-	+	+	+	+	tefu
chr3R	23782395	23782895	501	*	4.85	3.96	5.4	-1.44	0.0023	0.0133	0	3	20	4.67	21.92	32.66	48.28	45.65	-	-	-	+	+	+	mbc
chr2L	18615767	18616267	501	*	4.05	2.82	4.7	-1.89	0.00232	0.0134	0	2	9	0.67	11.46	28.86	22.63	26.58	-	-	-	+	-	+	IFT46
chr3L	19081295	19081795	501	*	4.49	3.61	5.03	-1.42	0.00232	0.0134	0	3	6	14.67	15.94	34.67	33.95	29.62	-	-	-	+	+	+	Mkp3
chr3R	10664900	10665400	501	*	3.38	1.98	4.08	-2.1	0.00233	0.0135	0	3	7	1.33	3.49	9.4	20.74	20.49	-	-	-	+	+	+
chr2R	16515930	16516430	501	*	4.92	4.22	5.39	-1.17	0.00235	0.0135	0	3	14	19.34	22.42	36.01	46.39	43.42	-	-	-	+	+	+	Sema2a
chr2L	20509752	20510252	501	*	4.89	5.47	3.9	1.57	0.00235	0.0135	2	3	89	19.34	24.41	16.33	15.09	13.39	+	-	+	+	+	+
chr4	205767	206267	501	*	4.86	4.09	5.36	-1.27	0.00236	0.0136	0	3	12	17.34	21.92	29.75	44.13	49.51	-	-	-	+	+	+	CG31998
chr3R	7730647	7731147	501	*	3.48	4.17	2.09	2.08	0.00237	0.0136	2	0	34	8	11.95	3.36	6.79	2.64	+	-	+	-	-	-
chr2R	12017575	12018075	501	*	4.24	3.16	4.85	-1.69	0.00237	0.0136	0	3	4	17.34	5.48	23.49	34.7	28.41	-	-	-	+	+	+	otk
chrX	122543	123043	501	*	4.93	5.47	4.06	1.41	0.00237	0.0136	3	3	62	43.35	27.89	12.08	28.67	9.33	+	+	+	+	+	+	FBgn0058469
chr4	1196660	1197160	501	*	3.7	2.32	4.4	-2.08	0.00238	0.0136	0	2	3	2	9.96	13.65	19.99	29.62	-	-	-	+	-	+	PIP4K
chr3L	2881488	2881988	501	*	5.08	4.41	5.54	-1.13	0.00242	0.0139	0	3	23	16.01	24.91	36.01	49.41	54.18	-	-	-	+	+	+	Tet
chr3L	12432532	12433032	501	*	3.83	2.78	4.44	-1.65	0.00244	0.014	0	3	7	4.67	8.97	21.7	23.76	19.48	-	-	-	+	+	+	toe
chrX	3295829	3296329	501	*	4.65	5.2	3.75	1.44	0.00245	0.014	2	2	60	30.01	19.92	14.09	16.97	9.33	+	-	+	+	+	-	dnc
chr2R	18802486	18802986	501	*	4.61	3.66	5.17	-1.51	0.00246	0.014	0	3	4	14	19.92	38.7	28.67	40.99	-	-	-	+	+	+	MFS14
chr2L	21237059	21237559	501	*	5.38	4.77	5.81	-1.04	0.00247	0.014	2	3	19	31.34	31.38	59.5	48.66	60.06	-	+	+	+	+	+	CG31626
chr3L	347234	347734	501	*	4.11	3.02	4.73	-1.71	0.00247	0.014	0	2	3	7.34	13.95	24.83	24.89	29.62	-	-	-	+	-	+	mth
chr3R	13794467	13794967	501	*	4.39	3.46	4.95	-1.49	0.00247	0.014	1	3	12	6	14.94	23.49	41.11	28.2	+	-	-	+	+	+	FBgn0051588
chr3R	14031855	14032355	501	*	4.18	3.13	4.78	-1.65	0.00247	0.014	0	3	10	3.33	12.95	21.25	35.83	25.57	-	-	-	+	+	+	CG3061
chr2R	13224120	13224620	501	*	4.64	3.74	5.19	-1.45	0.00249	0.0141	1	3	5	22.67	12.45	35.34	38.47	35.51	-	+	-	+	+	+	Dp
chr3R	18196902	18197402	501	*	4.72	3.96	5.22	-1.25	0.00249	0.0141	1	3	10	19.34	17.43	36.46	33.57	41.6	-	-	+	+	+	+	Ssdp
chr2L	9125459	9125959	501	*	4.93	4.21	5.41	-1.19	0.00249	0.0141	1	2	23	10.67	21.92	39.82	38.09	49.31	-	-	+	+	-	+	CG32982
chrX	19298265	19298765	501	*	4.86	4.05	5.37	-1.32	0.0025	0.0142	3	3	10	19.34	20.42	29.08	56.2	39.16	+	+	+	+	+	+	CG8034
chr2L	5301191	5301691	501	*	4.4	3.28	5.03	-1.75	0.00251	0.0142	0	3	16	0.67	12.45	33.33	30.93	33.68	-	-	-	+	+	+	vri
chr2L	12085649	12086149	501	*	4.99	4.24	5.48	-1.24	0.00252	0.0142	0	3	13	30.68	12.95	43.84	46.02	43.83	-	-	-	+	+	+	prd
chr3L	27615042	27615542	501	*	5.78	6.32	4.88	1.44	0.00252	0.0142	3	3	119	78.69	42.34	21.92	54.31	12.38	+	+	+	+	+	+
chrX	18930176	18930676	501	*	5.77	5.22	6.17	-0.95	0.00254	0.0143	2	3	31	34.68	45.83	71.8	67.89	75.68	-	+	+	+	+	+	CG43759
chrX	10824299	10824799	501	*	3.84	2.47	4.53	-2.06	0.00254	0.0143	0	3	5	0.67	10.96	19.24	18.48	31.45	-	-	-	+	+	+	FBgn0267184
chrX	15435992	15436492	501	*	4.33	4.92	3.31	1.61	0.00256	0.0144	3	3	39	34.68	17.43	5.37	17.73	6.7	+	+	+	+	+	+	Cngl
chr3R	14740360	14740860	501	*	4.73	3.93	5.24	-1.31	0.00257	0.0144	0	3	10	19.34	16.44	26.4	43	44.23	-	-	-	+	+	+	eff
chr3L	11832431	11832931	501	*	4.35	3.54	4.87	-1.33	0.00259	0.0145	0	3	14	11.34	9.46	26.17	27.91	33.48	-	-	-	+	+	+	CycA
chrX	9099975	9100475	501	*	1.44	2.37	-1.9	4.27	0.00259	0.0145	1	1	9	6	0.5	0.22	0.38	0.2	+	-	-	+	-	-	CG7766
chr2R	10764832	10765332	501	*	1.82	2.7	-0.82	3.52	0.0026	0.0146	2	1	2	10	7.47	1.12	0.38	0.2	+	-	+	-	+	-	CG33144
chr2L	5978360	5978860	501	*	4.55	3.67	5.1	-1.42	0.00261	0.0146	0	3	7	11.34	19.92	30.42	38.47	33.68	-	-	-	+	+	+	chic
chr2R	11650765	11651265	501	*	4.77	4.04	5.26	-1.22	0.00261	0.0146	0	3	14	13.34	21.92	34.9	38.85	40.99	-	-	-	+	+	+	FBgn0011915
chr4	1123194	1123694	501	*	4.02	2.84	4.66	-1.83	0.00262	0.0146	0	3	1	10	10.46	19.68	26.78	29.62	-	-	-	+	+	+	Arf102F
chr2L	12618386	12618886	501	*	4.82	4.03	5.33	-1.3	0.00264	0.0147	2	3	15	10.67	23.41	29.97	49.79	41.19	+	-	+	+	+	+	Ref2
chr3R	14569389	14569889	501	*	3.78	2.64	4.41	-1.77	0.00264	0.0147	0	2	4	6.67	7.97	19.91	14.33	29.42	-	-	-	+	-	+	Cys
chrX	6643769	6644269	501	*	2.9	3.64	1.34	2.3	0.00264	0.0147	2	0	18	11.34	7.97	1.12	3.02	3.45	+	-	+	-	-	-	pigs
chr2L	19161347	19161847	501	*	5.1	4.44	5.55	-1.11	0.00265	0.0147	0	3	16	22.01	26.9	40.26	53.18	47.07	-	-	-	+	+	+	brat
chr3R	20550420	20550920	501	*	4.82	4.02	5.33	-1.3	0.00267	0.0148	1	3	14	11.34	23.41	31.76	52.05	36.52	-	-	+	+	+	+	Stat92E
chr2L	14023878	14024378	501	*	3.65	2.35	4.33	-1.98	0.00267	0.0148	0	2	1	5.34	8.97	18.79	18.48	22.93	-	-	-	+	-	+	hll
chr3L	17806181	17806681	501	*	6.16	6.69	5.31	1.39	0.00267	0.0148	3	3	153	107.37	50.31	28.19	70.15	20.49	+	+	+	+	+	+	CG5589
chr2R	10558702	10559202	501	*	5.23	4.47	5.72	-1.25	0.00269	0.0149	1	3	17	12	37.36	49.88	53.18	55.19	-	-	+	+	+	+	psq
chrX	9500446	9500946	501	*	4.79	3.82	5.37	-1.55	0.00269	0.0149	1	3	6	8	28.39	39.15	38.47	46.47	-	-	+	+	+	+	mgl
chrX	3104193	3104693	501	*	4.23	4.84	3.14	1.69	0.0027	0.0149	3	3	48	27.34	10.46	10.07	10.56	5.88	+	+	+	+	+	+	kirre
chr3L	271393	271893	501	*	4.51	3.53	5.1	-1.57	0.0027	0.0149	0	3	5	8.67	20.92	27.07	34.7	40.78	-	-	-	+	+	+	miple2
chr3L	19167603	19168103	501	*	4.35	3.19	4.98	-1.79	0.00271	0.0149	1	3	7	2	18.43	30.2	25.65	39.16	-	-	+	+	+	+	fz2
chr3L	27136231	27136731	501	*	4.35	3.46	4.9	-1.45	0.00272	0.0149	0	2	11	6	15.94	29.08	28.29	32.46	-	-	-	+	-	+	vtd
chr3L	20620584	20621084	501	*	5.19	4.42	5.69	-1.27	0.00273	0.015	0	3	10	25.34	28.89	40.49	69.78	44.44	-	-	-	+	+	+	knrl
chr2R	16512305	16512805	501	*	4.83	5.38	3.91	1.47	0.00274	0.015	3	3	64	39.35	21.92	12.3	24.89	7.91	+	+	+	+	+	+	Sema2a
chr3L	24535924	24536424	501	*	4.31	3.34	4.89	-1.56	0.00276	0.0151	1	3	6	9.34	14.94	19.46	32.44	37.13	-	-	+	+	+	+	mRpS5
chrX	7307554	7308054	501	*	4.8	4.07	5.29	-1.22	0.00278	0.0152	0	2	12	17.34	20.92	37.58	46.77	33.07	-	-	-	+	+	-	brk
chr2R	6131766	6132266	501	*	6.15	5.49	6.6	-1.11	0.00278	0.0152	3	3	33	37.35	64.75	66.21	124.09	101.05	+	+	+	+	+	+	EcR
chrX	3845426	3845926	501	*	5.14	4.45	5.6	-1.15	0.00279	0.0152	1	3	12	30.68	22.91	47.2	46.02	52.55	-	-	+	+	+	+	ec
chr3R	29772523	29773023	501	*	4.84	4.17	5.3	-1.13	0.0028	0.0153	0	2	23	18.01	12.95	37.8	39.6	40.38	-	-	-	+	-	+	kay
chr2L	4031636	4032136	501	*	6.14	5.52	6.57	-1.05	0.00281	0.0153	2	3	27	48.02	62.76	80.31	107.87	97.8	-	+	+	+	+	+	ed
chr3L	14191152	14191652	501	*	3.91	2.9	4.5	-1.59	0.00283	0.0154	0	3	6	8	8.47	20.36	27.91	19.48	-	-	-	+	+	+	nuf
chr2R	24538839	24539339	501	*	1.18	2.1	-1.9	4	0.00285	0.0155	3	1	6	3.33	3.49	0.22	0.38	0.2	+	+	+	-	+	-	CG4622
chr3L	1177956	1178456	501	*	3.55	2.41	4.17	-1.76	0.00287	0.0156	0	2	5	6	4.98	14.54	18.48	21.1	-	-	-	+	-	+	bab2
chr2R	8654737	8655237	501	*	4.37	3.45	4.93	-1.48	0.00288	0.0156	0	3	5	13.34	14.45	25.95	36.21	29.22	-	-	-	+	+	+	ptc
chrX	6924754	6925254	501	*	3.54	4.25	2.1	2.15	0.00289	0.0156	1	1	33	14.67	9.46	3.58	8.3	1.01	+	-	-	-	+	-	CG14431
chr3R	13015898	13016398	501	*	4.55	3.75	5.06	-1.31	0.00289	0.0156	0	3	12	10	18.43	29.08	34.7	36.52	-	-	-	+	+	+	CtBP
chr2R	24547452	24547952	501	*	4.76	3.92	5.28	-1.36	0.0029	0.0156	1	3	7	14	24.41	40.04	36.59	40.18	-	-	+	+	+	+	CG4622
chrX	8640628	8641128	501	*	4.29	3.4	4.83	-1.44	0.0029	0.0156	0	3	11	10.67	9.96	21.7	39.98	23.94	-	-	-	+	+	+	oc
chr2L	9454382	9454882	501	*	4.87	3.93	5.43	-1.5	0.00293	0.0158	1	3	3	21.34	21.42	32.44	52.05	44.84	-	-	+	+	+	+	numb
chr3L	8458731	8459231	501	*	3.88	2.62	4.54	-1.92	0.00293	0.0158	0	3	15	2	1.49	25.5	21.12	23.13	-	-	-	+	+	+	Gug
chrX	16220973	16221473	501	*	3.61	2.3	4.29	-1.98	0.00297	0.016	0	3	1	5.34	8.47	24.16	17.73	16.64	-	-	-	+	+	+
chr2R	16594065	16594565	501	*	5.2	4.58	5.63	-1.05	0.00297	0.016	1	3	28	18.67	24.91	39.59	60.35	48.7	-	-	+	+	+	+	CG8306
chr3R	4813027	4813527	501	*	4.22	3.25	4.79	-1.53	0.00301	0.0162	0	3	5	12.67	10.96	20.8	34.7	27.39	-	-	-	+	+	+	Hus1-like
chrX	4689188	4689688	501	*	3.42	4.08	2.16	1.91	0.00304	0.0163	1	1	22	20.67	7.97	4.03	6.79	2.64	+	-	-	-	+	-	ctp
chr3R	1292803	1293303	501	*	1.82	2.69	-0.63	3.32	0.00305	0.0164	1	1	10	5.34	3.98	0.22	1.51	0.2	+	-	-	-	+	-	Myo81F
chr2R	13629558	13630058	501	*	3.48	4.17	2.12	2.05	0.00307	0.0164	2	1	36	6	11.95	4.47	4.9	3.65	+	-	+	+	-	-	CG17716
chr3L	10028138	10028638	501	*	1.2	2.11	-1.9	4.01	0.00309	0.0165	3	3	3	2	7.97	0.22	0.38	0.2	+	+	+	+	+	+	dpr6
chr4	1026882	1027382	501	*	4.44	3.25	5.08	-1.83	0.0031	0.0166	1	3	1	6.67	20.92	29.97	31.68	39.97	-	-	+	+	+	+	PlexA
chr2L	19337927	19338427	501	*	5.31	4.64	5.77	-1.13	0.0031	0.0166	0	3	13	36.01	25.9	55.7	47.52	60.47	-	-	-	+	+	+
chr3L	15336164	15336664	501	*	3.98	2.73	4.63	-1.9	0.00311	0.0166	0	2	1	6	12.95	22.15	31.68	20.7	-	-	-	+	+	-	Toll-6
chr3L	27279020	27279520	501	*	4.28	3.08	4.93	-1.84	0.00311	0.0166	0	3	1	8	16.44	22.15	26.02	43.22	-	-	-	+	+	+	Dbp80
chr3R	26024225	26024725	501	*	5.31	4.66	5.75	-1.1	0.00312	0.0166	3	3	15	29.34	31.38	47.42	63.74	50.73	+	+	+	+	+	+	E(spl)m4-BFM
chr2R	9138423	9138923	501	*	4.07	3.18	4.61	-1.44	0.00313	0.0167	0	2	11	8.67	7.47	25.72	19.99	27.8	-	-	-	+	+	-	CG8788
chr3R	20594584	20595084	501	*	3.52	2.32	4.16	-1.84	0.00316	0.0168	0	3	4	4	6.97	13.87	21.12	18.67	-	-	-	+	+	+	bon
chr2L	481100	481600	501	*	3.27	1.96	3.95	-1.99	0.00316	0.0168	0	2	7	2.67	1.99	17.67	10.56	18.06	-	-	-	+	-	+	ush
chrX	8411556	8412056	501	*	4.18	3.23	4.75	-1.52	0.00316	0.0168	0	3	8	8.67	11.46	17	34.7	29.02	-	-	-	+	+	+	Trf2
chrX	6461208	6461708	501	*	3.93	4.58	2.68	1.91	0.00325	0.0172	3	3	39	28.01	4.98	6.04	8.3	4.87	+	+	+	+	+	+	CG42340
chrX	19783393	19783893	501	*	4.98	4.1	5.52	-1.42	0.00325	0.0172	0	3	4	22.67	24.91	38.92	55.82	42.81	-	-	-	+	+	+	zld
chr2R	15921088	15921588	501	*	3.72	2.44	4.39	-1.94	0.00328	0.0173	0	2	4	3.33	8.97	13.42	34.32	15.02	-	-	-	-	+	+	sli
chrX	10815559	10816059	501	*	5.69	4.96	6.18	-1.22	0.00328	0.0173	2	3	14	34.01	45.33	46.3	83.36	87.66	-	+	+	+	+	+	Imp
chrX	2155779	2156279	501	*	3.52	2.19	4.2	-2.02	0.0033	0.0174	0	2	1	6.67	5.98	15.88	26.02	13.39	-	-	-	+	+	-	wapl
chr3R	16765896	16766396	501	*	4.36	3.41	4.93	-1.52	0.00334	0.0176	0	3	4	18.01	9.96	25.72	34.7	31.04	-	-	-	+	+	+	FBgn0020556
chrX	16358752	16359252	501	*	4.19	3.07	4.81	-1.73	0.00336	0.0177	0	3	4	5.34	15.94	19.01	27.16	37.74	-	-	-	+	+	+	nonA
chrX	21241902	21242402	501	*	2.01	2.83	-0.08	2.91	0.00337	0.0177	3	3	8	9.34	3.98	0.89	1.13	0.81	+	+	+	+	+	+	CG32521
chr2R	12957544	12958044	501	*	4.61	3.85	5.11	-1.26	0.00338	0.0177	0	2	20	11.34	11.95	31.99	26.02	45.45	-	-	-	+	-	+
chr2L	18881274	18881774	501	*	5.46	3.35	6.29	-2.93	0.00344	0.018	0	3	21	0.67	8.97	86.57	86.75	60.87	-	-	-	+	+	+	tup
chr3R	24866814	24867314	501	*	4.92	4.22	5.39	-1.17	0.00344	0.018	1	3	13	18.01	24.91	48.99	42.24	34.9	-	-	+	+	+	+	Elal
chr2R	14713344	14713844	501	*	2.7	0.92	3.47	-2.56	0.00346	0.0181	0	2	1	2.67	1.99	13.42	10.18	9.74	-	-	-	+	-	+	mspo
chrX	16116808	16117308	501	*	3.83	4.43	2.78	1.64	0.00347	0.0181	2	2	30	18.01	16.44	4.03	11.32	5.28	+	-	+	+	+	-
chrX	11146645	11147145	501	*	4.82	4.16	5.27	-1.11	0.00347	0.0181	0	3	16	20.67	16.94	41.16	33.57	41.19	-	-	-	+	+	+	Ran
chr2R	9441262	9441762	501	*	4.35	3.38	4.92	-1.54	0.00351	0.0183	0	3	4	9.34	17.93	27.96	31.31	31.86	-	-	-	+	+	+	ced-6
chr2R	6132884	6133384	501	*	4.17	3.26	4.72	-1.46	0.00352	0.0183	0	3	12	7.34	9.46	17.22	32.81	29.22	-	-	-	+	+	+	EcR
chr3L	128319	128819	501	*	3.9	2.91	4.48	-1.58	0.00352	0.0183	0	3	8	8	6.48	15.66	30.55	20.9	-	-	-	+	+	+	Pdk1
chr2L	4055633	4056133	501	*	4.26	3.18	4.87	-1.69	0.00353	0.0184	0	2	1	12.67	13.45	26.62	29.04	31.86	-	-	-	+	-	+	ed
chr3L	8825099	8825599	501	*	3.4	2.15	4.06	-1.91	0.00354	0.0184	0	2	7	1.33	4.98	13.42	19.24	17.45	-	-	-	+	-	+	dally
chr2R	11581826	11582326	501	*	4.06	3.15	4.61	-1.46	0.00355	0.0184	0	2	13	8.67	4.98	22.15	23.01	28.2	-	-	-	+	-	+	tou
chr2R	24033802	24034302	501	*	4.67	3.93	5.15	-1.22	0.00359	0.0186	0	3	17	9.34	19.43	36.46	32.06	38.35	-	-	-	+	+	+	Chi
chr3L	3475269	3475769	501	*	3.59	4.26	2.27	2	0.00359	0.0186	3	3	34	18.67	4.98	5.37	6.03	3.04	+	+	+	+	+	+	CG42324
chr2L	3631962	3632462	501	*	3.93	2.94	4.52	-1.58	0.00359	0.0186	0	3	11	4	7.97	16.11	25.65	26.99	-	-	-	+	+	+	for
chr3R	6966468	6966968	501	*	3.91	2.77	4.54	-1.77	0.0036	0.0186	0	2	10	4	6.48	9.84	34.7	25.16	-	-	-	-	+	+	Antp
chr3L	14634602	14635102	501	*	6.07	5.52	6.47	-0.96	0.00361	0.0187	2	3	49	36.01	52.3	64.42	102.59	99.42	+	-	+	+	+	+	RecQ5
chrX	9499874	9500374	501	*	4.77	3.94	5.3	-1.36	0.00362	0.0187	1	3	7	14	24.91	48.76	33.19	36.12	-	-	+	+	+	+	mgl
chr3L	16410424	16410924	501	*	6.49	5.98	6.86	-0.89	0.00364	0.0187	3	3	70	66.69	52.3	106.7	137.29	105.51	+	+	+	+	+	+	fax
chrX	1707453	1708386	934	*	3.24	3.98	1.65	2.34	0.00364	0.0187	3	2	31	8	8.47	3.13	5.66	0.61	+	+	+	+	+	-
chr2R	10559389	10559889	501	*	5.16	4.54	5.59	-1.06	0.00365	0.0187	1	3	26	24.67	18.93	43.17	62.99	38.55	-	-	+	+	+	+	psq
chrX	5447280	5447780	501	*	3.72	4.39	2.44	1.95	0.00365	0.0187	2	1	37	18.01	7.97	4.03	9.81	2.43	+	+	-	-	+	-	SPR
chrX	19360999	19361499	501	*	5.08	4.33	5.56	-1.23	0.00365	0.0187	1	3	11	16.01	33.37	48.54	44.88	48.49	-	-	+	+	+	+	kek5
chrX	13443197	13443697	501	*	1.09	2	-1.9	3.9	0.00372	0.0191	3	3	5	4	2.99	0.22	0.38	0.2	+	+	+	+	+	+	Neto
chr3R	1096660	1097160	501	*	3.65	4.28	2.53	1.75	0.00374	0.0192	2	0	32	12.67	13.45	6.71	7.17	3.45	+	-	+	-	-	-	Myo81F
chr3R	17711008	17711508	501	*	5.49	4.87	5.93	-1.05	0.00375	0.0192	2	3	20	26.68	41.34	49.88	69.78	62.9	-	+	+	+	+	+	osa
chr3R	17079277	17079777	501	*	3.61	2.53	4.22	-1.69	0.00377	0.0193	0	3	7	7.34	2.99	15.21	18.86	21.91	-	-	-	+	+	+	Keap1
chr3L	20004975	20005475	501	*	3.71	2.58	4.34	-1.76	0.00381	0.0195	0	2	4	6	7.97	13.2	18.86	28.61	-	-	-	+	-	+	kug
chr2R	6612782	6613282	501	*	5.25	4.6	5.7	-1.1	0.00381	0.0195	0	3	16	30.01	26.9	40.49	67.14	48.29	-	-	-	+	+	+	jing
chrX	5142238	5142738	501	*	3.23	3.91	1.92	1.99	0.00383	0.0195	3	3	23	6.67	15.44	5.14	3.77	2.43	+	+	+	+	+	+	CG15465
chr2R	13567514	13568014	501	*	3.76	2.5	4.42	-1.92	0.00384	0.0195	1	3	1	8	7.97	14.99	16.6	32.67	-	-	+	+	+	+
chr2R	17822256	17822756	501	*	5.95	5.22	6.44	-1.22	0.00384	0.0195	2	3	13	37.35	61.27	84.11	76.19	100.03	-	+	+	+	+	+	grh
chrX	4262470	4262970	501	*	1.27	2.19	-1.9	4.09	0.00386	0.0196	3	3	1	10.67	1.99	0.22	0.38	0.2	+	+	+	+	+	+
chr2L	16613075	16613575	501	*	4.54	5.13	3.54	1.59	0.00391	0.0199	3	3	63	27.34	14.45	7.61	18.86	8.32	+	+	+	+	+	+	mtgo
chr3L	22582150	22582650	501	*	3.27	3.96	1.92	2.03	0.00392	0.0199	3	3	21	16.67	8.97	2.01	7.54	1.83	+	+	+	+	+	+	CG14459
chrX	3468182	3468682	501	*	3.17	3.93	1.47	2.47	0.00395	0.02	3	2	35	7.34	3.49	1.12	4.53	2.64	+	+	+	+	+	-	CG12206
chrUn_DS483562v1	33855	34355	501	*	2.29	3.14	-0.08	3.23	0.00395	0.02	1	1	16	8	2.49	0.22	0.38	2.23	+	-	-	+	-	-
chr2L	20994783	20995283	501	*	4.35	3.54	4.86	-1.33	0.00396	0.02	0	3	8	15.34	11.46	27.74	27.91	31.65	-	-	-	+	+	+	CG42238
chr2R	24098895	24099395	501	*	4.17	3.27	4.73	-1.45	0.00396	0.02	0	2	7	12	9.96	22.37	21.12	35.91	-	-	-	+	-	+	gek
chr4	1260293	1260793	501	*	3.55	2.41	4.18	-1.77	0.00396	0.02	0	3	4	4	7.97	20.13	16.22	18.06	-	-	-	+	+	+	FBgn0053653
chr2L	21418682	21419182	501	*	3.73	2.49	4.39	-1.9	0.00397	0.02	3	3	3	11.34	2.49	13.2	29.42	20.29	+	+	+	+	+	+	His1
chr2R	21475776	21476276	501	*	4.34	3.25	4.95	-1.71	0.00397	0.02	0	2	1	18.01	9.46	22.59	34.7	35.71	-	-	-	+	-	+	Sdc
chrX_DS484611v1_random	98	598	501	*	1.85	2.75	-1.09	3.84	0.00397	0.02	1	2	17	0.67	2.49	0.22	0.38	0.81	-	+	-	+	-	+
chr2L	22515441	22515941	501	*	5.06	5.62	4.15	1.47	0.00398	0.02	2	2	90	30.68	26.9	12.97	30.55	9.74	+	-	+	+	+	-
chr2R	12261356	12261856	501	*	5.93	5.45	6.29	-0.84	0.00399	0.02	3	3	45	45.35	40.85	73.37	78.83	82.79	+	+	+	+	+	+	Cam
chrX	3772859	3773359	501	*	4.5	3.75	4.99	-1.24	0.004	0.0201	0	3	13	14	13.45	27.96	27.16	40.38	-	-	-	+	+	+	Tlk
chr2R	5652611	5653111	501	*	3.94	2.67	4.6	-1.93	0.00404	0.0202	0	3	1	4.67	13.45	19.68	33.19	20.09	-	-	-	+	+	+	CG1344
chr2R	2847855	2848355	501	*	3.34	2	4.03	-2.03	0.00404	0.0202	0	2	1	6	4.98	12.53	15.84	20.49	-	-	-	+	-	+	CG41378
chr2L	16286569	16287069	501	*	4.97	4.13	5.49	-1.37	0.00405	0.0203	1	3	5	18.01	29.39	39.82	45.26	50.12	-	-	+	+	+	+	crp
chr2L	12849604	12850104	501	*	3.15	3.86	1.66	2.21	0.00407	0.0204	2	0	21	18.67	3.98	3.13	4.9	1.42	+	-	+	-	-	-
chr2L	21836370	21836870	501	*	3.11	1.53	3.84	-2.31	0.00408	0.0204	0	2	1	2.67	4.98	10.51	10.18	22.32	-	-	-	+	-	+	tsh
chr2L	7543990	7544490	501	*	5.62	5.02	6.04	-1.02	0.00408	0.0204	1	3	18	42.01	37.36	63.53	61.48	72.23	-	-	+	+	+	+	RapGAP1
chr2L	3861476	3861976	501	*	3.18	1.53	3.93	-2.4	0.00408	0.0204	0	2	1	0.67	6.97	14.32	15.09	16.23	-	-	-	+	-	+	TTLL4B
chr3R	8187646	8188146	501	*	4.06	3.14	4.61	-1.47	0.00409	0.0204	1	3	7	8	11.46	25.95	19.24	28.2	+	-	-	+	+	+
chr3L	8826064	8826564	501	*	3.45	2.09	4.14	-2.05	0.0041	0.0204	0	2	1	3.33	8.47	17.67	15.09	20.09	-	-	-	+	-	+	dally
chr3R	14714221	14714721	501	*	4.31	3.54	4.81	-1.27	0.00411	0.0204	0	2	13	10	11.95	27.96	26.78	29.62	-	-	-	+	-	+	kibra
chr3R	26796428	26796928	501	*	3.81	2.73	4.43	-1.69	0.00412	0.0205	0	3	3	8	8.97	15.43	24.89	24.15	-	-	-	+	+	+	Tl
chr3R	24876012	24876512	501	*	4.57	3.71	5.11	-1.4	0.00414	0.0206	0	3	9	20.67	9.46	23.71	49.79	30.03	-	-	-	+	+	+	CG3744
chrX	11710253	11710753	501	*	3.56	2.18	4.26	-2.07	0.00419	0.0207	0	2	5	0.67	7.97	12.75	30.17	14.41	-	-	-	+	+	-	FucT6
chrX	8672173	8672673	501	*	3.72	2.58	4.35	-1.76	0.00422	0.0209	0	2	6	8	3.98	15.43	32.81	12.78	-	-	-	+	+	-
chrX	12601249	12601749	501	*	3.95	2.86	4.56	-1.7	0.00425	0.021	0	3	10	1.33	10.46	20.36	25.65	24.96	-	-	-	+	+	+	Sec16
chr2L	2037743	2038243	501	*	5.48	4.88	5.91	-1.03	0.00425	0.021	2	3	18	34.01	36.36	65.09	66.01	48.9	-	+	+	+	+	+	Su(dx)
chrX	2558982	2559955	974	*	6.65	7.18	5.79	1.39	0.00426	0.021	3	3	236	118.7	79.7	47.65	96.18	22.32	+	+	+	+	+	+	Pdfr
chr3L	3782639	3783139	501	*	4.97	4.35	5.4	-1.05	0.00426	0.021	1	3	21	16.67	23.41	37.13	47.15	42.41	-	-	+	+	+	+	CG32264
chr2L	3478162	3478662	501	*	4.88	4.01	5.42	-1.41	0.00426	0.021	0	3	5	23.34	19.92	45.86	56.58	26.17	-	-	-	+	+	+	Thor
chr3R	13660977	13661477	501	*	4.97	4.27	5.43	-1.16	0.00429	0.0211	1	3	13	18.67	26.4	38.47	53.18	37.74	-	-	+	+	+	+	Hrb87F
chr3R	17826057	17826557	501	*	5.97	5.33	6.41	-1.07	0.00431	0.0212	2	3	19	46.68	55.29	71.13	91.65	91.71	-	+	+	+	+	+	tinc
chr3R	30021784	30022284	501	*	4.81	4.06	5.3	-1.24	0.00431	0.0212	1	3	10	14.67	25.4	40.71	33.57	43.83	-	-	+	+	+	+	Axn
chrX	18928923	18929423	501	*	4.37	3.47	4.92	-1.45	0.00434	0.0213	0	3	8	9.34	15.94	21.7	25.27	43.83	-	-	-	+	+	+	CG43759
chr2R	8797310	8797810	501	*	3.61	2.53	4.22	-1.69	0.00434	0.0213	0	2	9	3.33	4.98	16.11	14.33	25.36	-	-	-	+	-	+	sns
chr2R	18307636	18308136	501	*	3.89	2.84	4.5	-1.66	0.00435	0.0213	0	2	4	10	7.47	14.99	32.06	20.7	-	-	-	-	+	+	sbb
chr2R	8776678	8777178	501	*	1.46	2.34	-1.09	3.42	0.00436	0.0213	3	3	5	4.67	5.48	0.22	0.38	0.81	+	+	+	+	+	+
chrX	8058367	8058867	501	*	4.53	3.82	5.01	-1.19	0.00436	0.0213	0	3	13	13.34	15.94	34.45	28.29	33.89	-	-	-	+	+	+	fs(1)h
chr3R	23300784	23301284	501	*	4.42	3.36	5.03	-1.67	0.00437	0.0213	0	3	1	13.34	16.44	23.49	41.87	32.67	-	-	-	+	+	+	pnt
chr2L	10221075	10221575	501	*	4.79	3.94	5.32	-1.39	0.00438	0.0214	1	3	4	24.01	17.93	33.33	45.26	41.39	-	-	+	+	+	+	Npc1a
chr2L	867799	868299	501	*	4.67	4	5.13	-1.13	0.00438	0.0214	0	3	22	12	13.95	35.79	33.95	35.31	-	-	-	+	+	+	aru
chrX	3344279	3344779	501	*	3.35	1.76	4.09	-2.33	0.00439	0.0214	0	2	1	8.67	0.5	12.53	13.58	24.96	-	-	-	+	-	+	FBgn0266180
chr3R	26036229	26036729	501	*	4.09	3.16	4.65	-1.49	0.00443	0.0216	0	2	6	11.34	9.46	19.24	21.88	34.29	-	-	-	+	-	+	E(spl)m7-HLH
chr3L	19896276	19896776	501	*	3.35	2.19	3.99	-1.8	0.00443	0.0216	0	2	4	4.67	4.98	16.33	16.97	14.2	-	-	-	+	-	+	Su(Tpl)
chrX	5240677	5241177	501	*	1.7	2.56	-0.75	3.31	0.00446	0.0217	3	2	11	2.67	3.98	0.45	1.13	0.2	+	+	+	+	+	-	CG15465
chr3L	19207870	19208370	501	*	4.01	4.69	2.68	2.01	0.00447	0.0217	3	3	43	25.34	8.97	4.25	13.58	1.42	+	+	+	+	+	+	fz2
chr3R	24046923	24047423	501	*	5.52	4.95	5.92	-0.97	0.00449	0.0218	2	3	26	32.68	34.37	54.36	77.7	49.91	-	+	+	+	+	+	Rox8
chrX	12578996	12579496	501	*	4.38	3.46	4.93	-1.47	0.00454	0.022	0	3	13	4.67	15.44	24.16	43	24.55	-	-	-	+	+	+	Pits
chr2L	4282965	4283465	501	*	5.02	4.3	5.5	-1.2	0.00459	0.0222	0	3	9	26.01	23.91	36.24	55.07	44.23	-	-	-	+	+	+	tutl
chrX	5636454	5636954	501	*	4.67	5.22	3.78	1.44	0.00461	0.0223	3	3	59	29.34	23.41	7.61	24.14	9.33	+	+	+	+	+	+	OtopLa
chr2L	16284186	16284686	501	*	3.91	2.74	4.55	-1.82	0.00465	0.0225	0	2	1	14	4.98	18.57	27.16	24.75	-	-	-	+	-	+	crp
chrX	2465700	2466200	501	*	3.99	2.88	4.62	-1.73	0.00466	0.0225	0	3	1	10.67	10.46	21.47	30.55	21.51	-	-	-	+	+	+	boi
chrX	4303319	4303819	501	*	1.75	2.62	-0.82	3.44	0.00473	0.0228	2	0	12	2	4.48	1.12	0.38	0.2	+	+	-	-	-	-	CG12692
chr2R	5350432	5350932	501	*	4.15	3.08	4.76	-1.69	0.00475	0.0228	0	2	9	3.33	12.95	12.53	32.81	36.12	-	-	-	-	+	+	CG10395
chr3L	7559447	7559947	501	*	1.22	2.13	-1.9	4.03	0.00475	0.0228	3	3	6	6.67	0.5	0.22	0.38	0.2	+	+	+	+	+	+	CG14837
chrY_CP007107v1_random	57246	57746	501	*	8.72	9.29	7.74	1.55	0.00475	0.0228	3	3	1006	583.52	290.4	184.1	338.7	119.71	+	+	+	+	+	+
chr3R	18109382	18109882	501	*	7.27	7.82	6.38	1.44	0.00476	0.0229	3	3	363	228.74	84.18	68	138.42	42.61	+	+	+	+	+	+	sr
chr3R	9031401	9031901	501	*	3.91	2.9	4.5	-1.59	0.00478	0.0229	0	3	4	8	10.46	25.95	25.27	16.64	-	-	-	+	+	+	neur
chr3R	24464672	24465172	501	*	1.77	2.65	-0.95	3.6	0.00481	0.023	2	0	5	13.34	0.5	0.22	1.13	0.2	+	-	+	-	-	-	FBgn0267209
chrX	7306463	7306963	501	*	4.54	3.75	5.05	-1.3	0.00482	0.0231	0	3	9	12	19.43	30.42	39.98	28.81	-	-	-	+	+	+	brk
chr2L	4370042	4370542	501	*	3.39	1.85	4.12	-2.26	0.00482	0.0231	0	3	1	9.34	0.5	12.97	17.73	21.31	-	-	-	+	+	+	Traf4
chr2R	15897794	15898294	501	*	5.36	4.69	5.82	-1.13	0.00483	0.0231	2	3	10	36.01	31.38	59.95	53.56	56.2	-	+	+	+	+	+	CG33463
chr2R	7530645	7531145	501	*	3.7	2.62	4.32	-1.69	0.00485	0.0231	0	2	3	10	5.48	15.43	23.38	20.9	-	-	-	+	+	-	Drat
chr3L	19478564	19479064	501	*	2.96	1.44	3.68	-2.24	0.00485	0.0231	0	2	3	4.67	0.5	14.32	12.45	11.77	-	-	-	+	-	+	CG18294
chr4	359645	360145	501	*	4.96	4.16	5.47	-1.31	0.00486	0.0232	1	3	6	21.34	26.4	32.88	46.02	54.38	-	-	+	+	+	+	Hcf
chr3L	22400138	22400638	501	*	5.75	5.08	6.2	-1.12	0.00489	0.0232	2	3	13	46.01	42.34	61.74	73.17	86.03	-	+	+	+	+	+	Ten-m
chr2L	19158738	19159238	501	*	4.92	4.3	5.35	-1.05	0.0049	0.0232	0	3	22	22.67	14.45	35.57	39.6	47.48	-	-	-	+	+	+	brat
chr4	959619	960119	501	*	4.07	2.91	4.71	-1.79	0.00491	0.0232	0	2	2	6.67	13.95	13.87	28.67	35.91	-	-	-	-	+	+	4E-T
chr3R	25482301	25482801	501	*	4.37	3.53	4.9	-1.37	0.00491	0.0232	0	3	9	8.67	16.94	22.59	35.83	31.25	-	-	-	+	+	+	XNP
chr2R	7488700	7489200	501	*	4.57	3.84	5.06	-1.22	0.00491	0.0232	0	3	16	10	16.94	29.08	28.29	42.61	-	-	-	+	+	+	wech
chr3L	19635058	19635558	501	*	3.48	2.35	4.1	-1.75	0.00491	0.0232	0	2	4	5.34	5.98	15.66	12.82	23.13	-	-	-	+	-	+	wnd
chr3L	9112034	9112534	501	*	3.43	4.08	2.21	1.87	0.00492	0.0232	2	1	11	26.68	12.95	1.57	6.79	5.48	+	+	-	-	+	-	bol
chr3L	21066642	21067142	501	*	5.01	4.36	5.45	-1.1	0.00492	0.0232	1	3	13	24.01	24.41	36.24	45.26	49.91	-	-	+	+	+	+	siz
chr2R	10541451	10541951	501	*	4.43	3.69	4.92	-1.23	0.00492	0.0232	0	2	15	9.34	14.45	27.96	33.57	29.22	-	-	-	+	-	+	FBgn0266628
chrX	3210786	3211286	501	*	5.47	6.17	4.05	2.12	0.00492	0.0232	2	3	146	28.01	41.34	15.66	21.88	12.17	+	-	+	+	+	+	dnc
chr3L	5856286	5856786	501	*	3.69	2.62	4.3	-1.68	0.00496	0.0234	1	3	9	2	7.47	22.82	20.74	15.62	+	-	-	+	+	+
chr2L	5799386	5799886	501	*	4.51	3.76	5	-1.24	0.00498	0.0235	0	3	16	12.67	11.95	23.26	43.37	29.62	-	-	-	+	+	+	CG9171
chr3R	13988735	13989235	501	*	4.79	3.83	5.37	-1.54	0.00499	0.0235	0	2	12	2.67	27.89	41.16	37.72	45.05	-	-	-	+	-	+	rdx
chr3R	12712191	12712691	501	*	2.54	0.73	3.32	-2.59	0.00499	0.0235	2	3	1	2	1.99	8.95	11.32	9.74	-	+	+	+	+	+	mus308
chrX	6865962	6866462	501	*	3.58	2.34	4.23	-1.9	0.005	0.0235	0	2	8	0.67	6.48	11.86	19.99	24.55	-	-	-	-	+	+	CG14434
chr2L	6149334	6149834	501	*	3.15	3.8	1.95	1.85	0.00503	0.0236	3	3	18	13.34	10.46	2.68	6.03	2.84	+	+	+	+	+	+	Muc26B
chr3R	4232748	4233248	501	*	4.2	3.24	4.78	-1.54	0.00504	0.0236	1	3	6	5.34	16.94	30.42	23.38	28.41	-	-	+	+	+	+	Gel
chr2L	14508758	14509258	501	*	4.27	3.36	4.83	-1.47	0.00505	0.0237	0	3	4	13.34	13.45	24.83	35.08	25.16	-	-	-	+	+	+
chr3L	10246167	10246667	501	*	4.9	4.03	5.44	-1.41	0.00507	0.0238	1	3	6	14.67	28.39	26.17	53.56	50.73	-	-	+	+	+	+	Or67c
chr3R	16718512	16719012	501	*	4.02	3.11	4.58	-1.46	0.00508	0.0238	0	3	6	12	7.97	18.57	24.52	28.61	-	-	-	+	+	+	Ubx
chr2L	9467360	9467860	501	*	4.5	5.1	3.46	1.64	0.00508	0.0238	2	1	71	20.67	10.96	10.51	13.58	8.93	+	+	-	-	-	+	FBgn0264269
chr2R	4544533	4545033	501	*	4.78	4.15	5.22	-1.07	0.00509	0.0238	0	3	21	15.34	16.94	31.54	39.23	41.19	-	-	-	+	+	+	Stlk
chrX	4745660	4746160	501	*	2.32	3.11	0.44	2.67	0.0051	0.0238	1	1	12	6	7.97	0.22	2.64	1.22	+	-	-	-	+	-
chr2L	1556565	1557065	501	*	3.15	1.61	3.88	-2.27	0.0051	0.0238	0	2	4	4.67	0.5	7.38	25.65	11.16	-	-	-	+	+	-	haf
chr2R	11616079	11616579	501	*	3.7	2.57	4.32	-1.75	0.00511	0.0238	0	3	2	11.34	4.48	17.9	21.88	20.29	-	-	-	+	+	+	tou
chr3L	21026369	21026869	501	*	4.91	4.17	5.39	-1.23	0.00513	0.0239	1	3	18	8	27.89	43.4	41.49	41.19	-	-	+	+	+	+	skd
chr3R	20768967	20769467	501	*	4.47	5.08	3.37	1.71	0.00514	0.0239	3	3	62	32.68	6.97	8.05	15.84	7.1	+	+	+	+	+	+	Syp
chrUn_DS484149v1	2456	2956	501	*	3.67	2.58	4.28	-1.7	0.00515	0.0239	0	3	3	8	6.97	13.65	21.5	23.13	-	-	-	+	+	+
chr3L	6766936	6767436	501	*	3.97	2.98	4.55	-1.57	0.00516	0.0239	0	2	5	10.67	7.97	15.88	19.99	34.49	-	-	-	+	-	+
chr2R	10830618	10831118	501	*	3.61	4.27	2.38	1.89	0.00517	0.024	3	3	28	21.34	8.47	3.36	10.18	2.03	+	+	+	+	+	+	CG12344
chr2R	16155332	16155832	501	*	4.9	4.22	5.36	-1.14	0.00518	0.024	1	3	11	26.01	18.93	36.46	47.52	39.36	-	+	-	+	+	+	lbk
chr4	1031548	1032048	501	*	4.23	3.32	4.79	-1.47	0.00518	0.024	0	2	6	10	13.95	18.79	26.4	37.74	-	-	-	+	-	+	ATPsynbeta
chr2R	15755764	15756264	501	*	4.06	2.88	4.7	-1.82	0.0052	0.024	0	2	8	0.67	13.45	35.34	20.74	21.91	-	-	-	+	-	+	CG30089
chr3R	19000240	19000740	501	*	2.83	1.07	3.6	-2.53	0.0052	0.024	0	2	1	1.33	3.98	7.61	18.86	9.94	-	-	-	-	+	+	gukh
chrX	18966812	18967312	501	*	3.44	2.1	4.13	-2.03	0.00522	0.0241	0	2	1	9.34	2.49	11.63	21.88	18.87	-	-	-	-	+	+	CG43759
chr3R	17319524	17320024	501	*	5.28	5.83	4.41	1.41	0.00524	0.0242	3	1	98	50.68	21.42	17.22	35.83	10.75	+	+	+	-	+	-	beat-IIa
chr2R	15648616	15649116	501	*	3.3	4	1.87	2.13	0.00528	0.0243	2	2	28	12	7.97	3.13	1.13	6.7	+	-	+	-	+	+	CG42524
chr2L	10387805	10388305	501	*	3.9	2.85	4.5	-1.65	0.00528	0.0243	0	2	3	8.67	9.96	16.55	19.61	31.65	-	-	-	-	+	+	Cdk1
chr2L	9149926	9150426	501	*	3.63	2.57	4.23	-1.66	0.00531	0.0244	0	2	3	7.34	7.47	18.12	19.99	18.26	-	-	-	+	-	+	CG32982
chr3L	11237207	11237707	501	*	5.69	5.01	6.15	-1.14	0.00535	0.0246	2	3	11	48.68	36.86	74.94	64.12	73.86	-	+	+	+	+	+	Ir68a
chrX	22443930	22444430	501	*	2.97	1.53	3.67	-2.14	0.00538	0.0247	0	2	2	4.67	1.99	14.99	9.43	13.8	-	-	-	+	-	+	CG14621
chr3R	25074554	25075054	501	*	3.72	2.78	4.28	-1.5	0.00542	0.0248	0	2	9	6.67	4.98	17.9	21.88	18.67	-	-	-	+	-	+	shams
chr2L	23065120	23065620	501	*	3.92	2.99	4.48	-1.49	0.00542	0.0249	0	3	13	7.34	3.49	19.68	22.63	24.55	-	-	-	+	+	+
chr3R	28397169	28397669	501	*	3.45	4.16	1.99	2.16	0.00548	0.0251	3	3	22	26.01	5.48	3.8	7.54	0.61	+	+	+	+	+	+
chr2L	15491873	15492373	501	*	4.39	3.54	4.92	-1.38	0.00548	0.0251	0	3	5	15.34	14.45	23.93	32.81	33.89	-	-	-	+	+	+
chr4	44634	45134	501	*	3.69	2.69	4.27	-1.59	0.00548	0.0251	0	2	6	5.34	7.97	14.99	19.24	23.74	-	-	-	+	-	+	PlexB
chrX	5783280	5783780	501	*	1.82	2.66	-0.48	3.15	0.0055	0.0251	3	0	8	6	4.98	1.57	0.38	0.2	+	+	+	-	-	-	CG3108
chrX	3778082	3778582	501	*	4.89	4.17	5.37	-1.19	0.00551	0.0251	1	3	12	14.67	27.4	37.8	33.95	51.94	-	-	+	+	+	+	FBgn0263532
chr2R	14311531	14312031	501	*	5.38	4.71	5.83	-1.12	0.00552	0.0252	1	3	11	29.34	38.35	52.12	55.44	63.1	-	-	+	+	+	+	Shrm
chrX	19895889	19896389	501	*	4.2	4.79	3.21	1.58	0.00556	0.0253	3	3	49	23.34	10.46	7.83	12.45	7.51	+	+	+	+	+	+	Hers
chr2R	22506008	22506508	501	*	3.68	2.48	4.32	-1.84	0.00557	0.0253	0	2	3	3.33	10.46	12.53	22.25	25.16	-	-	-	-	+	+	px
chrX	4052183	4052683	501	*	3.41	4.02	2.33	1.69	0.00558	0.0254	2	0	15	21.34	12.45	2.68	7.54	4.87	+	-	+	-	-	-	FBgn0267038
chrX	1642246	1642746	501	*	4.22	4.82	3.2	1.61	0.00559	0.0254	3	3	53	22.01	9.46	9.17	10.56	7.91	+	+	+	+	+	+	Mur2B
chr3L	17644449	17644949	501	*	4.18	3.32	4.72	-1.4	0.0056	0.0254	1	2	7	14	8.97	19.91	33.19	25.97	-	-	+	+	-	+	Pep
chrUn_DS485073v1	276	776	501	*	3.03	1.56	3.74	-2.19	0.0056	0.0254	1	1	1	3.33	4.48	10.07	17.35	12.78	+	-	-	+	-	-
chr3R	23133549	23134049	501	*	3.43	2.32	4.05	-1.73	0.00569	0.0258	0	2	5	4	5.98	11.86	19.24	18.67	-	-	-	+	+	-	hh
chr3R	31062299	31062799	501	*	4.02	3.05	4.6	-1.55	0.00569	0.0258	0	2	4	9.34	11.46	17.45	23.01	32.06	-	-	-	+	-	+	dco
chr3L	20792645	20793145	501	*	4.51	3.71	5.02	-1.31	0.0057	0.0258	1	3	11	9.34	18.93	22.59	37.72	36.93	-	-	+	+	+	+	Six4
chr3R	24481364	24481864	501	*	3.64	4.29	2.43	1.86	0.00572	0.0258	3	3	37	15.34	6.48	5.59	7.54	3.04	+	+	+	+	+	+
chr3R	15669015	15669515	501	*	4.62	3.92	5.09	-1.17	0.00574	0.0259	0	3	19	9.34	16.94	27.74	38.09	36.32	-	-	-	+	+	+	pxb
chr2R	5260424	5260924	501	*	3.47	2.17	4.15	-1.98	0.00574	0.0259	0	2	1	4	8.47	12.08	17.73	23.33	-	-	-	+	-	+	d4
chr3R	6762450	6762950	501	*	4.33	3.18	4.97	-1.78	0.00576	0.026	1	3	1	5.34	20.92	31.32	34.7	27.8	-	-	+	+	+	+	Ama
chr3L	6822660	6823160	501	*	3.3	2.1	3.95	-1.85	0.00579	0.026	0	2	3	5.34	4.48	10.51	18.1	17.65	-	-	-	-	+	+
chrX	16422743	16423243	501	*	4.66	3.83	5.18	-1.34	0.0058	0.0261	0	3	4	19.34	19.43	35.79	36.59	36.12	-	-	-	+	+	+	hang
chr3L	9042281	9042781	501	*	4.4	3.4	4.99	-1.58	0.0058	0.0261	1	3	2	9.34	20.42	30.42	30.55	34.09	-	-	+	+	+	+	Doc1
chr3L	744258	744758	501	*	4.88	4.19	5.34	-1.16	0.00581	0.0261	0	3	11	16.67	26.9	41.61	35.83	44.23	-	-	-	+	+	+	hng3
chr2L	8521821	8522321	501	*	4.31	3.5	4.83	-1.33	0.00582	0.0261	0	3	7	12	14.94	26.17	25.27	33.89	-	-	-	+	+	+	Acer
chr2R	14001631	14002131	501	*	3.65	2.46	4.3	-1.84	0.00583	0.0261	0	3	1	6	9.46	16.55	24.89	17.45	-	-	-	+	+	+	mam
chr3R	3622839	3623339	501	*	4.1	2.89	4.74	-1.85	0.00585	0.0262	0	3	1	13.34	7.97	11.18	27.91	41.19	-	-	-	+	+	+	Alg-2
chr3R	23228274	23228774	501	*	3.13	3.88	1.5	2.38	0.00586	0.0262	3	3	27	4.67	12.45	0.45	6.41	1.62	+	+	+	+	+	+	CG4467
chr3L	17446058	17446558	501	*	3.72	2.56	4.35	-1.8	0.00592	0.0264	2	3	13	0.67	3.98	21.92	23.38	16.03	+	-	+	+	+	+	CG18265
chr3R	29493083	29493583	501	*	4.12	3.13	4.7	-1.57	0.00592	0.0264	0	2	4	7.34	14.94	24.61	33.95	19.48	-	-	-	+	+	-	CG2310
chr3L	16407863	16408363	501	*	5.31	4.69	5.73	-1.04	0.00592	0.0264	1	3	16	23.34	38.35	53.01	55.07	51.54	-	-	+	+	+	+	fax
chrX	20717528	20718028	501	*	3.31	1.76	4.04	-2.28	0.00595	0.0265	0	2	1	0.67	8.47	17.67	12.07	19.48	-	-	-	+	-	+
chr2R	11789988	11790488	501	*	4.46	3.63	4.99	-1.36	0.00596	0.0266	1	3	10	6.67	20.42	34.9	26.4	33.89	-	-	+	+	+	+	Ir48c
chr2R	20716953	20717453	501	*	2.76	3.46	1.37	2.09	0.00597	0.0266	3	3	14	12	6.97	2.46	2.26	3.04	+	+	+	+	+	+	dpr1
chr2L	2164758	2165258	501	*	6.23	5.5	6.71	-1.21	0.00601	0.0267	2	3	12	66.02	57.78	95.29	109.38	108.55	-	+	+	+	+	+	aop
chrX	8057782	8058282	501	*	3.69	2.53	4.32	-1.79	0.00601	0.0267	0	2	2	5.34	9.96	14.76	27.53	17.65	-	-	-	+	+	-	fs(1)h
chr2R	8813645	8814145	501	*	1.8	2.65	-0.54	3.19	0.00603	0.0267	3	2	8	9.34	1.49	0.67	0.38	1.01	+	+	+	+	+	-	sns
chr3L	11356854	11357354	501	*	4.09	3.04	4.69	-1.65	0.00603	0.0267	1	3	1	12.67	10.96	22.82	31.31	23.33	-	-	+	+	+	+
chr2L	15744884	15745384	501	*	4.17	3.33	4.7	-1.37	0.00603	0.0267	0	2	6	12.67	11.46	22.15	26.4	29.42	-	-	-	+	-	+	CycE
chr2R	7483700	7484200	501	*	4.15	2.95	4.8	-1.85	0.00609	0.0269	1	2	3	4.67	15.44	44.07	9.81	29.62	-	-	+	+	-	+	wech
chr3R	6778864	6779364	501	*	3.4	2.17	4.05	-1.88	0.00615	0.0272	0	3	1	6	6.48	14.54	17.73	17.45	-	-	-	+	+	+	FBgn0261638
chr2L	22129857	22130357	501	*	4.5	3.53	5.07	-1.55	0.00616	0.0272	0	3	2	10.67	21.92	30.42	35.83	34.7	-	-	-	+	+	+	CycK
chr3R	11372322	11372822	501	*	5.8	5.22	6.22	-1	0.00619	0.0273	1	3	28	25.34	58.28	75.61	76.57	71.42	-	-	+	+	+	+	pros
chr2L	3657865	3658365	501	*	4.02	2.97	4.62	-1.65	0.00619	0.0273	0	2	4	6	13.45	30.2	29.8	13.8	-	-	-	+	-	+	for
chrX	16320113	16320613	501	*	4.3	3.38	4.86	-1.48	0.00621	0.0274	1	3	7	7.34	16.94	20.13	41.11	25.77	-	-	+	+	+	+	Cyp1
chr3L	7899156	7899656	501	*	3.78	2.63	4.41	-1.77	0.00622	0.0274	0	3	9	0.67	8.97	23.49	14.71	25.57	-	-	-	+	+	+	pbl
chr3R	10507814	10508314	501	*	3.91	2.83	4.52	-1.69	0.00632	0.0278	0	2	1	9.34	10.96	25.72	19.99	22.93	-	-	-	+	-	+	hth
chr3L	12312181	12312681	501	*	2.11	2.95	-0.08	3.03	0.00632	0.0278	2	0	9	10.67	3.49	0.22	0.38	2.23	+	+	-	-	-	-
chr3R	9204496	9204996	501	*	3.73	4.33	2.7	1.62	0.00633	0.0278	3	3	25	26.68	8.47	6.04	9.05	4.46	+	+	+	+	+	+	pum
chrX	6694381	6694881	501	*	3.57	2.38	4.22	-1.84	0.00635	0.0279	0	2	1	6.67	7.97	16.33	24.52	15.02	-	-	-	+	-	+	CG14442
chr2R	6511254	6511754	501	*	3.47	2.2	4.13	-1.93	0.00636	0.0279	0	2	1	9.34	3.49	19.91	11.32	21.31	-	-	-	+	-	+	jing
chr2R	21048122	21048622	501	*	6.27	5.63	6.71	-1.07	0.00637	0.0279	2	3	23	47.35	78.7	97.53	96.18	119.92	-	+	+	+	+	+
chrX	14247354	14247854	501	*	4.19	3.28	4.74	-1.46	0.00643	0.0282	0	2	4	14.67	10.46	19.91	28.29	31.86	-	-	-	+	-	+	mud
chr3L	13408426	13408926	501	*	5.11	4.46	5.55	-1.1	0.00647	0.0283	2	3	12	32.01	21.92	37.13	50.54	53.16	-	+	+	+	+	+
chr3R	18108469	18109247	779	*	3.91	4.45	3.03	1.41	0.00648	0.0283	3	1	31	14	20.42	6.93	8.67	8.93	+	+	+	-	+	-	sr
chr3L	20785025	20785525	501	*	5.26	4.54	5.74	-1.2	0.00648	0.0283	1	3	12	23.34	34.37	34.67	78.83	46.67	-	-	+	+	+	+	CG11399
chr3R	22876868	22877368	501	*	1.7	2.55	-0.7	3.25	0.00649	0.0283	3	3	1	4.67	11.95	0.89	0.75	0.2	+	+	+	+	+	+
chr2L	16601630	16602130	501	*	4.54	3.72	5.06	-1.34	0.00649	0.0283	1	3	8	16.67	14.94	18.57	43	38.55	-	-	+	+	+	+	mtgo
chr2L	190698	191198	501	*	3.96	2.87	4.58	-1.71	0.0065	0.0283	0	2	1	10	10.96	26.84	15.84	29.02	-	-	-	+	-	+	spen
chr3R	22789198	22789698	501	*	5.8	5.22	6.22	-1	0.0065	0.0283	1	3	18	48.68	45.33	76.28	76.57	70.41	-	-	+	+	+	+	CG7029
chrX	10741679	10742179	501	*	4.1	3.23	4.63	-1.41	0.0065	0.0283	0	3	8	10.67	9.46	15.66	29.04	29.83	-	-	-	+	+	+	ras
chr2L	8429786	8430286	501	*	3.43	2.18	4.09	-1.91	0.00651	0.0283	0	2	5	0.67	7.97	16.33	16.22	18.67	-	-	-	+	-	+	Akap200
chr2R	7479448	7479948	501	*	2.89	1.29	3.63	-2.34	0.00653	0.0283	0	2	1	5.34	1	14.76	7.54	14.81	-	-	-	+	-	+	Aldh-III
chr3L	14972611	14973111	501	*	5.66	5.08	6.07	-0.99	0.00653	0.0283	2	3	19	46.68	35.86	55.7	78.45	67.36	-	+	+	+	+	+	Brd
chr2L	10413692	10414192	501	*	3.2	1.71	3.92	-2.21	0.00655	0.0283	0	2	1	1.33	7.47	12.53	13.2	19.68	-	-	-	-	+	+	CG5355
chr2L	3770010	3770510	501	*	3.54	2.18	4.22	-2.04	0.00655	0.0283	0	2	1	2.67	9.96	10.74	21.12	24.15	-	-	-	+	-	+	bowl
chrX	18303565	18304065	501	*	5.79	5.3	6.16	-0.86	0.00657	0.0284	1	3	30	50.02	38.35	71.36	71.29	72.03	-	-	+	+	+	+
chr3R	21561515	21562015	501	*	4.32	3.43	4.87	-1.43	0.00657	0.0284	1	3	11	4	17.43	24.38	33.19	30.03	+	-	-	+	+	+
chr2R	3943159	3943659	501	*	1.93	-0.47	2.78	-3.26	0.00658	0.0284	0	3	1	0.67	0.5	4.7	8.67	7.3	-	-	-	+	+	+	uex
chrX	8029011	8029511	501	*	3.47	4.16	2.11	2.05	0.00659	0.0284	3	3	37	10.67	5.98	1.57	7.17	4.26	+	+	+	+	+	+
chrX	15713154	15713654	501	*	3.55	2.56	4.13	-1.58	0.00659	0.0284	0	2	5	6.67	5.98	18.57	18.48	15.62	-	-	-	+	-	+	CG9281
chr2R	15640638	15641138	501	*	4.17	4.77	3.13	1.65	0.00659	0.0284	3	0	52	16.67	13.45	5.82	15.09	5.28	+	+	+	-	-	-	CG42524
chr2R	17392319	17392819	501	*	4.88	4.29	5.29	-1	0.0066	0.0284	0	3	22	17.34	19.43	39.37	43	35.1	-	-	-	+	+	+	CG10939
chr2R	10843796	10844296	501	*	4.47	3.77	4.93	-1.16	0.00663	0.0285	0	2	13	14	13.95	30.42	25.27	35.91	-	-	-	+	-	+	CG30015
chr3R	2951449	2951949	501	*	3.57	4.16	2.53	1.64	0.00663	0.0285	1	1	15	15.34	23.41	9.62	3.39	4.26	-	-	+	+	-	-	FBgn0267430
chr3L	21921847	21922347	501	*	1.47	2.35	-1.26	3.62	0.00666	0.0286	1	1	11	3.33	1	0.67	0.38	0.2	+	-	-	-	+	-	mub
chrX	7223971	7224471	501	*	2.89	1.44	3.6	-2.16	0.0067	0.0288	0	2	2	4.67	1.49	11.63	15.09	9.74	-	-	-	+	+	-	CG9650
chrX	3151121	3151621	501	*	3.32	2.02	4	-1.98	0.00672	0.0288	0	2	5	0.67	6.48	16.11	21.12	10.75	-	-	-	+	+	-	N
chrX	19028500	19029000	501	*	5.93	5.29	6.36	-1.07	0.00674	0.0289	2	3	16	45.35	56.29	69.12	85.62	92.32	-	+	+	+	+	+	CG43759
chr3R	915487	915987	501	*	3.29	3.96	1.97	1.99	0.00675	0.0289	2	0	31	9.34	6.48	4.47	2.64	4.67	+	-	+	-	-	-	Myo81F
chr2L	16350809	16351309	501	*	5.11	4.4	5.58	-1.18	0.00676	0.0289	1	3	12	15.34	35.86	37.8	54.31	51.54	-	-	+	+	+	+	chif
chr3L	19179129	19179629	501	*	3.88	2.85	4.47	-1.62	0.00678	0.0289	0	3	4	4.67	12.95	20.36	18.86	27.39	-	-	-	+	+	+	fz2
chrX	6699234	6699734	501	*	4.84	4.03	5.36	-1.32	0.0068	0.029	0	3	7	12.67	29.39	31.09	49.41	42.41	-	-	-	+	+	+	CG14440
chrX	18698272	18698772	501	*	2.97	3.72	1.32	2.41	0.00683	0.0291	2	0	25	6.67	7.97	0.22	3.39	3.86	+	-	+	-	-	-
chr3L	9854002	9854502	501	*	4.73	4.07	5.18	-1.11	0.00687	0.0292	0	3	14	22.01	14.45	33.78	44.13	30.84	-	-	-	+	+	+	RasGAP1
chr3R	20846730	20847230	501	*	4.95	4.2	5.45	-1.25	0.00687	0.0292	0	3	5	26.68	23.41	46.08	42.24	42.61	-	-	-	+	+	+	CG15696
chr2R	7487795	7488295	501	*	5.38	4.79	5.8	-1.01	0.00688	0.0292	1	3	15	35.34	32.88	50.33	64.5	52.35	-	-	+	+	+	+	wech
chr2L	10231891	10232391	501	*	4.65	3.97	5.11	-1.14	0.00689	0.0293	1	3	13	12.67	21.42	31.99	35.83	35.91	-	-	+	+	+	+	CG5694
chr2L	8081674	8082174	501	*	4.32	3.47	4.86	-1.39	0.00689	0.0293	0	3	5	13.34	14.94	27.51	21.88	37.54	-	-	-	+	+	+	Bsg
chr3L	14205042	14205542	501	*	5.84	5.27	6.25	-0.99	0.00695	0.0295	2	3	21	40.68	53.8	62.86	80.72	85.42	-	+	+	+	+	+	nuf
chrX	6352487	6352987	501	*	3.62	2.44	4.26	-1.81	0.00696	0.0295	0	3	1	11.34	3.98	16.33	20.74	20.29	-	-	-	+	+	+	ND-B16.6
chrX	6278939	6279439	501	*	4.21	3.09	4.83	-1.74	0.00697	0.0295	3	3	1	12	12.45	17	47.15	21.1	+	+	+	+	+	+	CG3566
chr3R	23314201	23314701	501	*	4.53	3.76	5.03	-1.27	0.00698	0.0296	0	2	14	10.67	15.94	19.68	46.02	32.26	-	-	-	-	+	+	pnt
chr3R	6737307	6737807	501	*	5.11	5.65	4.24	1.41	0.00702	0.0297	3	2	78	47.35	25.4	15.66	34.7	6.29	+	+	+	+	+	-	pb
chr2R	6193654	6194154	501	*	3.58	2.41	4.22	-1.8	0.00703	0.0297	0	2	2	4	9.96	15.43	16.6	23.74	-	-	-	+	-	+	Ptr
chr3L	15729115	15729615	501	*	5.46	4.87	5.87	-1	0.00705	0.0298	1	3	17	30.01	40.85	48.99	62.61	64.12	-	-	+	+	+	+	comm
chrX	18866220	18866720	501	*	4.22	3.36	4.75	-1.39	0.00712	0.03	0	3	10	5.34	15.44	21.25	29.04	30.44	-	-	-	+	+	+	CG7326
chr2L	5907255	5907755	501	*	5.35	4.81	5.74	-0.94	0.00715	0.0301	2	3	19	36.01	28.89	49.21	57.33	53.97	-	+	+	+	+	+	CG9021
chr3R	16207110	16207610	501	*	4.52	3.82	4.99	-1.17	0.00716	0.0301	1	3	13	12	17.43	25.5	36.96	33.07	-	-	+	+	+	+	mtSSB
chr3R	31725418	31725918	501	*	4.18	3.33	4.71	-1.38	0.00717	0.0302	0	2	17	4.67	8.47	23.93	33.57	21.1	-	-	-	+	+	-	ttk
chr3R	25069586	25070086	501	*	3.81	2.5	4.48	-1.99	0.00719	0.0302	0	2	1	2	13.95	15.88	24.89	26.38	-	-	-	+	-	+	Stt3B
chrX	5282721	5283221	501	*	3.48	4.2	1.96	2.25	0.0072	0.0302	3	2	33	15.34	6.97	3.13	8.3	0.2	+	+	+	+	+	-
chr2R	1071279	1071779	501	*	4.22	3.29	4.78	-1.48	0.0072	0.0302	0	3	5	8	16.44	23.49	21.12	37.54	-	-	-	+	+	+	rl
chr2R	22212717	22213217	501	*	3.83	2.97	4.36	-1.4	0.00722	0.0303	0	2	8	8	7.47	19.01	19.24	23.54	-	-	-	+	-	+	ari-2
chr3L	1746394	1746894	501	*	6.66	6.16	7.02	-0.86	0.00723	0.0303	3	3	62	63.35	89.66	130.64	109.38	150.35	+	+	+	+	+	+	CG13921
chr3R	29086805	29087305	501	*	4.34	3.41	4.91	-1.5	0.00725	0.0304	0	3	2	19.34	10.46	27.07	29.42	33.48	-	-	-	+	+	+	CG11873
chrX	5046996	5047496	501	*	4.2	3.44	4.7	-1.26	0.00728	0.0304	0	3	9	12.67	10.96	24.16	28.29	25.57	-	-	-	+	+	+	ovo
chr2R	7381639	7382139	501	*	5.43	4.88	5.83	-0.95	0.00728	0.0304	2	3	22	34.68	31.88	42.05	68.27	60.67	-	+	+	+	+	+	Dscam1
chr2R	10117364	10117864	501	*	4.94	4.33	5.37	-1.04	0.00728	0.0304	0	3	15	21.34	23.91	36.01	37.72	49.91	-	-	-	+	+	+	Pfk
chr2L	3083496	3083996	501	*	3.77	2.78	4.35	-1.57	0.00729	0.0304	0	2	5	6.67	8.97	21.25	26.78	13.19	-	-	-	+	+	-	toc
chr4	129539	130039	501	*	3.71	2.46	4.37	-1.91	0.0073	0.0304	0	2	1	4	11.46	12.3	21.12	28.41	-	-	-	+	-	+	Ank
chr3R	17081981	17082481	501	*	4.6	3.95	5.04	-1.09	0.00734	0.0306	0	3	14	16.01	16.44	30.65	32.44	35.51	-	-	-	+	+	+	Keap1
chrX	19352922	19353422	501	*	5.54	5	5.93	-0.93	0.00735	0.0306	2	3	21	32.01	42.84	61.07	62.99	58.44	-	+	+	+	+	+	kek5
chr2R	20996529	20997029	501	*	5.66	5.14	6.04	-0.9	0.0074	0.0307	2	3	32	30.68	43.34	50.55	69.02	77.71	-	+	+	+	+	+	dgt3
chr3L	3060087	3060587	501	*	4.66	3.96	5.13	-1.17	0.0074	0.0307	0	3	13	12.67	20.92	25.72	41.87	37.33	-	-	-	+	+	+	CG32486
chrX	15593037	15593537	501	*	3.35	2.17	4	-1.83	0.0074	0.0307	0	3	8	4	1.49	9.84	23.01	15.02	-	-	-	+	+	+	CG9220
chr3R	30765508	30766008	501	*	4.57	3.89	5.03	-1.14	0.00742	0.0308	0	3	13	14	17.43	40.04	29.8	28	-	-	-	+	+	+	zfh1
chr2L	22121542	22122042	501	*	4.16	3.18	4.73	-1.56	0.00742	0.0308	0	2	3	10.67	13.45	20.58	19.24	39.97	-	-	-	+	-	+	CG3651
chr3R	10626563	10627063	501	*	4.82	4.1	5.29	-1.19	0.00744	0.0308	1	3	7	22.67	21.92	36.46	36.21	45.05	-	-	+	+	+	+	hth
chrX	12185426	12185926	501	*	1.62	2.47	-0.71	3.18	0.00746	0.0309	2	0	10	2.67	3.98	0.45	0.38	1.01	+	+	-	-	-	-	Ten-a
chr2R	17143146	17143646	501	*	3.61	2.47	4.24	-1.77	0.00747	0.0309	2	3	11	0.67	4.98	13.65	18.86	24.15	-	+	+	+	+	+	FBgn0050234
chr3L	23337910	23338410	501	*	4.32	3.27	4.92	-1.65	0.00748	0.0309	0	3	1	12	15.94	22.15	23.01	45.65	-	-	-	+	+	+	alpha-Cat
chrX	3317419	3317919	501	*	2.57	3.36	0.65	2.71	0.0075	0.031	2	3	13	17.34	0.5	1.57	1.51	1.62	+	+	-	+	+	+	dnc
chrX	15890237	15890737	501	*	3	1.47	3.73	-2.26	0.00751	0.031	0	2	1	1.33	5.98	13.2	9.81	16.84	-	-	-	+	-	+	shi
chrX	3139739	3140239	501	*	4.16	3.34	4.67	-1.33	0.00752	0.031	0	3	7	12	11.46	20.13	26.02	30.44	-	-	-	+	+	+	N
chr3R	27581482	27581982	501	*	4.13	3.32	4.64	-1.32	0.00753	0.031	0	3	13	8	8.97	25.05	32.06	17.86	-	-	-	+	+	+	wdb
chrX	16552969	16553469	501	*	3.44	2.18	4.1	-1.91	0.00757	0.0311	0	2	1	4.67	7.97	11.41	22.25	17.65	-	-	-	-	+	+	Arp2
chr3R	21782204	21782704	501	*	4.07	3.22	4.6	-1.38	0.00759	0.0312	1	3	5	12	10.96	22.37	23.76	26.78	-	-	+	+	+	+	tsl
chrX	3780816	3781316	501	*	5.43	4.79	5.88	-1.09	0.0076	0.0312	2	3	12	28.01	42.84	48.99	64.5	62.9	-	+	+	+	+	+	Tlk
chr2R	406088	406588	501	*	0.89	1.78	-1.9	3.68	0.00761	0.0312	2	1	1	5.34	3.98	0.22	0.38	0.2	+	+	-	+	-	-	DIP-lambda
chr3R	17716954	17717454	501	*	4.15	3.23	4.7	-1.48	0.00762	0.0312	0	2	7	6.67	14.45	31.09	31.68	15.42	-	-	-	+	+	-	osa
chrX	6997245	6997745	501	*	5.62	5.1	6	-0.9	0.00764	0.0313	2	3	25	43.35	34.37	52.12	64.12	75.89	-	+	+	+	+	+	Inx2
chr3R	14893725	14894225	501	*	3.99	3.07	4.54	-1.48	0.00768	0.0314	0	3	4	10.67	10.46	17	26.78	26.17	-	-	-	+	+	+	CG7265
chr2L	166547	167047	501	*	4.67	3.92	5.16	-1.24	0.00768	0.0314	0	3	7	16.01	22.42	29.3	37.34	40.38	-	-	-	+	+	+	spen
chr3L	14643586	14644086	501	*	4.06	3.21	4.59	-1.38	0.00768	0.0314	0	2	11	5.34	11.46	24.61	18.1	29.42	-	-	-	+	-	+	dlp
chr4	1030704	1031204	501	*	3.81	2.83	4.39	-1.57	0.00769	0.0314	0	3	4	5.34	11.95	21.7	21.88	19.48	-	-	-	+	+	+	ATPsynbeta
chr3R	26002383	26002883	501	*	4.71	4.03	5.17	-1.14	0.0077	0.0314	1	3	14	14	20.92	28.19	32.06	47.48	-	-	+	+	+	+	FBgn0266397
chrX	11689577	11690077	501	*	3.27	2.02	3.93	-1.92	0.0077	0.0314	3	3	4	2.67	5.48	7.83	23.01	15.02	+	+	+	+	+	+	bif
chr2R	8083205	8083705	501	*	4.15	3.33	4.67	-1.34	0.00771	0.0314	0	2	7	12.67	10.46	23.93	32.44	20.09	-	-	-	+	+	-	slv
chr2L	22329417	22329917	501	*	3.17	3.82	1.94	1.87	0.00774	0.0315	2	0	23	13.34	5.98	3.8	4.9	2.84	+	-	+	-	-	-	Marf1
chrUn_CP007087v1	38085	38585	501	*	4.89	5.46	3.96	1.5	0.00775	0.0315	3	3	78	37.35	16.44	12.08	28.29	6.29	+	+	+	+	+	+
chrX	4937290	4937790	501	*	3.35	2.08	4.02	-1.94	0.00776	0.0316	0	2	2	4.67	5.98	7.16	20.74	20.7	-	-	-	-	+	+	Ptp4E
chr3R	16570272	16570772	501	*	5.34	4.83	5.73	-0.9	0.0078	0.0317	1	2	25	34.68	25.4	63.3	44.88	50.52	-	+	-	+	-	+	CG14891
chr2R	25056911	25057411	501	*	2.95	1.38	3.68	-2.3	0.00782	0.0317	0	2	2	5.34	0.5	19.68	6.41	12.38	-	-	-	+	-	+
chr3R	19156657	19157157	501	*	5.11	4.56	5.5	-0.95	0.00784	0.0318	1	3	23	22.67	24.91	42.73	55.44	37.94	-	-	+	+	+	+	nos
chr2L	2999618	3000118	501	*	3.42	2.06	4.1	-2.04	0.00786	0.0318	0	2	2	10	0.5	14.32	19.99	17.25	-	-	-	+	-	+	CG17265
chrX	2667448	2667948	501	*	8.76	9.34	7.75	1.59	0.00788	0.0319	3	3	1081	573.52	293.89	162.4	391.13	93.95	+	+	+	+	+	+	sgg
chr3R	1212662	1213162	501	*	3.45	2.24	4.1	-1.86	0.00788	0.0319	0	2	1	6.67	6.48	14.99	11.69	24.75	-	-	-	+	-	+	Myo81F
chr2L	20332824	20333324	501	*	4.82	4.22	5.25	-1.03	0.00791	0.032	0	3	18	23.34	14.45	41.38	41.11	31.65	-	-	-	+	+	+	spir
chr2R	20050217	20050717	501	*	3.67	2.75	4.22	-1.48	0.00793	0.032	0	2	6	6.67	7.47	17	18.1	20.9	-	-	-	+	-	+
chr3L	18854318	18854818	501	*	4.37	3.4	4.94	-1.54	0.008	0.0323	1	3	3	7.34	21.42	25.5	34.32	32.46	-	-	+	+	+	+	FBgn0266936
chr2R	24086318	24086818	501	*	4.05	2.97	4.67	-1.7	0.008	0.0323	0	3	1	8	14.45	16.78	27.91	31.45	-	-	-	+	+	+	snama
chr2R	7482712	7483212	501	*	3.71	2.81	4.26	-1.46	0.00802	0.0323	0	2	7	8	5.98	16.33	23.38	17.86	-	-	-	+	-	+	wech
chr2L	1411217	1411717	501	*	6.03	5.44	6.44	-1	0.00802	0.0323	3	3	19	54.02	57.28	87.91	90.9	81.97	+	+	+	+	+	+	robo2
chrY	66548	67048	501	*	2.16	0.08	2.98	-2.9	0.00805	0.0324	0	3	1	0.67	1.49	4.7	9.43	9.54	-	-	-	+	+	+	kl-5
chr3R	9881359	9881859	501	*	4.51	3.75	5.01	-1.25	0.00806	0.0324	0	3	7	16.01	17.43	24.16	35.08	37.13	-	-	-	+	+	+	FBgn0266389
chrX	7117547	7118047	501	*	4.11	3.25	4.65	-1.41	0.00806	0.0324	2	3	6	14	8.47	17	31.68	26.78	+	+	-	+	+	+
chrX	3740682	3741182	501	*	4.2	3.37	4.73	-1.35	0.00808	0.0324	0	3	14	4.67	12.45	20.8	32.81	25.77	-	-	-	+	+	+	Tlk
chrX	17821426	17821926	501	*	4.44	4.9	3.78	1.12	0.00808	0.0324	3	3	31	32.01	26.4	11.63	18.48	10.96	+	+	+	+	+	+	CG12986
chr3L	27261953	27262453	501	*	2.75	1.15	3.49	-2.34	0.0081	0.0325	0	3	2	0.67	3.98	8.28	13.2	12.17	-	-	-	+	+	+
chr2R	23187571	23188071	501	*	4.31	3.45	4.85	-1.4	0.00817	0.0327	1	3	3	15.34	14.45	27.96	27.53	31.04	-	-	+	+	+	+	side-V
chr2L	14261927	14262427	501	*	5.56	4.91	6.01	-1.1	0.00818	0.0327	2	3	11	38.01	41.34	50.11	75.43	67.97	-	+	+	+	+	+	wb
chr3L	15324192	15324692	501	*	4.2	4.75	3.31	1.44	0.0082	0.0328	2	2	44	22.67	13.95	7.61	15.09	7.1	+	-	+	+	+	-
chrX	18243329	18243829	501	*	4.66	3.86	5.18	-1.32	0.0082	0.0328	1	3	19	4	20.42	40.49	40.73	27.19	-	-	+	+	+	+	upd2
chr2L	21632721	21633221	501	*	3.53	2.33	4.18	-1.85	0.00822	0.0328	0	2	2	2.67	10.46	17	21.12	16.23	-	-	-	+	-	+	Df31
chrX	18503208	18503708	501	*	5.26	5.77	4.45	1.33	0.00827	0.033	3	3	97	39.35	27.89	19.46	36.59	9.33	+	+	+	+	+	+	Wnt5
chr3R	21459851	21460351	501	*	4.58	3.74	5.11	-1.37	0.00835	0.0333	1	3	6	8.67	25.4	31.32	32.44	40.18	-	-	+	+	+	+
chr3L	21706105	21706605	501	*	4.99	4.38	5.42	-1.04	0.00835	0.0333	1	3	12	28.01	22.42	40.94	39.6	47.89	-	-	+	+	+	+	CG32447
chr3R	6742105	6742605	501	*	3.58	2.31	4.25	-1.94	0.00836	0.0333	0	2	3	11.34	0.5	23.26	13.96	19.88	-	-	-	+	-	+	pb
chrX	588845	589345	501	*	3.23	2.11	3.86	-1.74	0.00838	0.0333	0	2	4	6	2.99	13.2	13.2	17.04	-	-	-	+	-	+	CG13366
chr3L	2385577	2386077	501	*	3.86	2.96	4.41	-1.45	0.00838	0.0333	0	3	11	3.33	8.97	17.67	21.5	24.55	-	-	-	+	+	+	Svil
chr3L	11552955	11553455	501	*	4.42	3.71	4.9	-1.18	0.00841	0.0334	0	3	18	7.34	13.95	26.4	32.06	30.84	-	-	-	+	+	+	Mob2
chr3L	19897523	19898023	501	*	4.6	3.72	5.14	-1.41	0.00844	0.0335	0	3	2	16.67	20.92	35.34	35.83	34.29	-	-	-	+	+	+	Su(Tpl)
chr3L	11420986	11421486	501	*	3.14	1.68	3.85	-2.16	0.00845	0.0335	0	2	2	0.67	6.97	19.24	10.56	13.39	-	-	-	+	-	+
chr3R	13715647	13716147	501	*	4.76	4.08	5.22	-1.14	0.0085	0.0337	2	3	10	21.34	19.43	27.51	41.49	42.61	-	+	+	+	+	+	FBgn0054044
chrX	7703080	7703580	501	*	3.4	4.04	2.21	1.83	0.00851	0.0337	3	2	28	7.34	13.95	1.79	6.79	5.28	+	+	+	-	+	+	CHES-1-like
chr4	179220	179720	501	*	4.89	3.2	5.64	-2.44	0.00852	0.0337	1	3	1	6.67	19.92	36.91	54.69	58.44	-	-	+	+	+	+	Arl4
chr2L	2161479	2161979	501	*	4.73	4.04	5.19	-1.16	0.00856	0.0338	0	2	23	7.34	18.93	44.51	29.8	35.51	-	-	-	+	-	+	aop
chrX	16574680	16575180	501	*	4.35	4.94	3.33	1.6	0.00857	0.0338	3	3	54	27.34	10.46	6.49	18.48	5.28	+	+	+	+	+	+	CanA-14F
chr3L	12649222	12649722	501	*	4.35	3.64	4.82	-1.18	0.0086	0.0339	0	2	12	14	11.46	22.59	32.06	30.03	-	-	-	+	-	+	FBgn0263379
chrX	10014642	10015142	501	*	3.11	3.82	1.64	2.18	0.0086	0.0339	3	3	18	16.01	8.47	3.13	6.03	0.2	+	+	+	+	+	+	Cht6
chr3R	6817982	6818482	501	*	4.16	3.28	4.7	-1.42	0.00866	0.0341	0	3	6	6.67	16.44	25.05	21.88	31.04	-	-	-	+	+	+	FBgn0026162
chr2R	10522853	10523353	501	*	3.35	2.04	4.02	-1.98	0.00868	0.0342	0	2	1	3.33	7.97	22.15	16.6	9.94	-	-	-	+	+	-	lola
chrY	2639326	2639826	501	*	2.52	3.32	0.57	2.75	0.00872	0.0343	2	1	10	18.01	1.99	3.13	1.13	0.2	+	+	-	-	+	-
chr3L	21460057	21460557	501	*	3.89	3.03	4.43	-1.4	0.00874	0.0344	0	3	9	6	9.46	19.91	27.53	17.04	-	-	-	+	+	+
chrX	4617116	4617616	501	*	5.02	4.26	5.51	-1.25	0.00875	0.0344	1	3	5	24.01	28.39	41.38	57.71	37.74	-	-	+	+	+	+	peb
chrX	16610671	16611171	501	*	4.52	3.86	4.97	-1.11	0.00876	0.0344	0	3	20	12.67	10.96	33.55	35.08	25.57	-	-	-	+	+	+	mbt
chr2L	14021662	14022162	501	*	4.05	3.12	4.61	-1.49	0.00877	0.0344	2	3	5	6.67	14.45	17.67	23.38	32.26	+	-	+	+	+	+	NimC3
chr4	1231584	1232084	501	*	3.27	1.89	3.97	-2.07	0.00877	0.0344	0	3	3	0.67	7.47	8.72	20.74	17.45	-	-	-	+	+	+	Dyrk3
chrX	5284433	5284933	501	*	1.29	2.17	-1.35	3.52	0.00879	0.0344	3	1	5	8	0.5	0.22	0.75	0.2	+	+	+	+	-	-
chrY_CP007114v1_random	21797	22297	501	*	4.09	4.66	3.13	1.53	0.0088	0.0344	3	2	35	22.01	18.93	4.03	17.35	4.87	+	+	+	+	+	-
chr3L	749165	749665	501	*	4.38	3.68	4.85	-1.17	0.0088	0.0344	0	2	17	8	13.45	33.33	26.02	27.39	-	-	-	+	+	-	emc
chr3L	19083093	19083593	501	*	4.59	3.74	5.13	-1.39	0.00883	0.0345	1	3	10	4.67	25.4	30.42	36.96	37.54	-	-	+	+	+	+	Mkp3
chr2R	23456204	23456704	501	*	9.54	10.15	8.47	1.69	0.00883	0.0345	3	3	2080	728.9	610.19	316.97	564.63	178.56	+	+	+	+	+	+	CG43795
chr2R	19292974	19293474	501	*	3.96	3.13	4.49	-1.35	0.00889	0.0347	0	2	14	7.34	4.98	18.79	21.88	26.58	-	-	-	+	-	+	mip40
chr3R	22139867	22140367	501	*	3.35	2.15	3.99	-1.84	0.00892	0.0348	0	3	1	5.34	6.97	17.22	17.35	13.19	-	-	-	+	+	+	SKIP
chr3L	14967710	14968210	501	*	6.02	5.47	6.41	-0.94	0.00893	0.0348	2	3	25	52.02	56.29	67.78	86	101.45	-	+	+	+	+	+	Tom
chr3L	24537085	24537585	501	*	3.33	2.08	3.99	-1.91	0.00895	0.0348	0	3	1	4.67	6.97	10.29	17.35	19.88	-	-	-	+	+	+	mRpS5
chr2R	18028670	18029170	501	*	3.38	4.01	2.2	1.81	0.00895	0.0348	2	2	27	14	7.47	4.25	7.54	2.03	+	-	+	+	+	-
chr3L	4062008	4062508	501	*	4.55	3.81	5.04	-1.23	0.00897	0.0348	0	2	7	18.67	16.44	36.24	23.76	38.55	-	-	-	+	-	+	dib
chr3L	3784823	3785323	501	*	3.52	2.49	4.12	-1.63	0.00899	0.0349	0	2	8	7.34	1.49	15.66	17.73	18.67	-	-	-	+	-	+	CG32264
chr2R	10428457	10428957	501	*	3.79	2.72	4.4	-1.68	0.00901	0.035	0	2	1	7.34	11.46	20.36	18.48	24.55	-	-	-	+	-	+	CG12896
chr3R	11378515	11379015	501	*	4.96	4.33	5.4	-1.07	0.00901	0.035	0	2	11	28.01	21.42	48.54	34.32	43.83	-	-	-	+	-	+	pros
chr3L	14960501	14961001	501	*	3.47	2.4	4.08	-1.68	0.00903	0.035	0	2	4	3.33	8.47	17.9	12.82	20.09	-	-	-	+	-	+
chr2L	9731241	9731741	501	*	4.42	3.68	4.9	-1.22	0.00906	0.0351	1	3	10	10	18.43	27.29	34.7	27.6	-	-	+	+	+	+	Nckx30C
chrX	6001067	6001567	501	*	3.99	2.99	4.57	-1.59	0.00909	0.0352	0	3	1	11.34	11.46	22.82	23.01	25.57	-	-	-	+	+	+	CG4766
chr3L	17124500	17125000	501	*	5.17	5.9	3.62	2.29	0.00912	0.0352	3	2	119	30.68	29.89	17.45	15.46	3.86	+	+	+	+	+	-	Rbp6
chr3L	7364828	7365328	501	*	3.57	2.43	4.19	-1.76	0.00913	0.0352	0	3	7	8.67	0.5	16.33	18.86	19.68	-	-	-	+	+	+	Sh3beta
chr2L	21502462	21503114	653	*	1.85	-0.47	2.69	-3.17	0.00917	0.0354	3	3	1	0.67	0.5	9.62	4.53	5.28	+	+	+	+	+	+	FBgn0053739
chr2L	13489271	13489771	501	*	2.26	0.47	3.03	-2.56	0.0092	0.0355	1	1	3	0.67	0.5	8.72	8.3	7.51	+	-	-	+	-	-	CG42784
chr3R	6996874	6997374	501	*	4.97	4.27	5.44	-1.18	0.0092	0.0355	1	3	10	31.34	16.44	34.45	60.72	35.31	-	+	-	+	+	+	Antp
chr3L	5626711	5627211	501	*	9.24	9.83	8.23	1.6	0.00922	0.0355	3	3	1534	738.9	454.28	238.01	514.84	149.54	+	+	+	+	+	+
chr3R	5109696	5110196	501	*	5.63	5.11	6.01	-0.9	0.00923	0.0355	2	3	22	36.01	45.83	59.05	64.12	70.81	-	+	+	+	+	+	CG43131
chr3R	3117904	3118404	501	*	4.06	3.21	4.59	-1.38	0.00927	0.0356	1	3	5	9.34	13.45	25.95	24.89	21.51	-	-	+	+	+	+	FBgn0267430
chr2L	8466543	8467043	501	*	3.64	2.5	4.26	-1.76	0.00929	0.0357	0	2	1	6	9.96	21.25	12.82	23.54	-	-	-	+	-	+	Agpat2
chr2R	18306917	18307417	501	*	5.51	5.03	5.87	-0.84	0.00929	0.0357	1	3	44	26.01	27.89	54.8	63.74	56.41	+	-	-	+	+	+	CG14505
chr3R	16251235	16251735	501	*	5.34	4.8	5.73	-0.93	0.00933	0.0358	1	3	17	36.01	30.39	51.9	49.03	58.03	-	-	+	+	+	+	tara
chr3R	14278695	14279195	501	*	5.51	4.96	5.91	-0.96	0.00933	0.0358	0	3	17	42.68	33.37	50.55	68.65	61.68	-	-	-	+	+	+	trx
chrX	4412485	4412985	501	*	3.76	2.77	4.34	-1.57	0.00934	0.0358	0	2	4	8	8.47	12.75	29.04	18.87	-	-	-	-	+	+	bi
chr2R	21713017	21713517	501	*	5.61	5.09	6	-0.91	0.0094	0.036	2	3	21	38.68	42.34	54.36	66.38	70.61	-	+	+	+	+	+	HmgD
chr2R	20602622	20603122	501	*	5.8	5.17	6.24	-1.07	0.00942	0.036	2	3	12	48.02	48.32	70.02	82.6	74.47	-	+	+	+	+	+	FBgn0262370
chrX	9134878	9135378	501	*	5.58	4.94	6.02	-1.08	0.00944	0.0361	2	3	11	36.01	45.33	61.96	56.95	75.68	-	+	+	+	+	+	fend
chr2R	11796040	11796540	501	*	4.2	3.18	4.79	-1.61	0.00945	0.0361	0	2	1	10.67	15.44	23.71	20.37	38.75	-	-	-	+	-	+	ths
chr3L	24796414	24796914	501	*	3.99	4.57	2.99	1.58	0.00949	0.0362	3	3	37	21.34	12.95	5.82	14.71	3.25	+	+	+	+	+	+
chr3R	9630596	9631096	501	*	4.35	3.5	4.88	-1.38	0.0095	0.0362	0	2	7	8	18.93	18.79	33.57	36.12	-	-	-	-	+	+	Calr
chr2R	12971608	12972108	501	*	4.14	3.12	4.73	-1.61	0.00951	0.0362	0	2	12	0.67	13.45	24.38	23.01	32.26	-	-	-	+	-	+	Psc
chrX	4678930	4679430	501	*	4.09	3.3	4.6	-1.3	0.00955	0.0364	0	3	11	6.67	11.95	19.68	28.67	24.35	-	-	-	+	+	+	fzr
chr3R	8846087	8846587	501	*	5.79	5.19	6.22	-1.03	0.00961	0.0366	2	3	18	40.01	51.31	49.66	87.13	86.44	-	+	+	+	+	+	pyd
chr2R	21364376	21364876	501	*	5.67	5.2	6.02	-0.82	0.00962	0.0366	2	3	36	29.34	44.83	62.19	66.38	65.74	-	+	+	+	+	+	cv-2
chr3R	6994879	6995379	501	*	5.02	4.49	5.4	-0.92	0.00968	0.0368	2	3	23	21.34	22.91	48.09	41.87	36.93	+	-	+	+	+	+	Antp
chrX	13233824	13234324	501	*	5.19	4.51	5.65	-1.14	0.00972	0.0369	1	3	9	20.67	38.85	47.65	49.79	53.16	-	-	+	+	+	+	mew
chr3R	19340647	19341147	501	*	3.19	1.98	3.84	-1.87	0.00976	0.037	0	2	3	3.33	5.48	8.05	16.97	18.06	-	-	-	+	-	+
chr3L	20610206	20610706	501	*	2.86	3.64	1.04	2.6	0.00978	0.0371	3	0	20	9.34	7.97	5.59	0.38	0.2	+	+	+	-	-	-	knrl
chr2R	18232448	18232948	501	*	4.66	4.04	5.09	-1.05	0.0098	0.0371	0	3	21	15.34	12.95	26.17	39.98	36.12	-	-	-	+	+	+	fj
chr2R	12779830	12780330	501	*	4.72	4.07	5.17	-1.1	0.00981	0.0371	1	3	11	15.34	23.91	34.45	34.7	38.55	-	-	+	+	+	+	sca
chr3L	2732134	2732634	501	*	2.98	3.62	1.81	1.8	0.00983	0.0372	3	3	15	11.34	10.46	4.03	2.26	4.26	+	+	+	+	+	+	Mrtf
chr3L	10810865	10811365	501	*	4.13	3.34	4.64	-1.29	0.00986	0.0373	1	3	7	14	9.46	21.7	22.63	30.23	+	-	-	+	+	+
chr3L	17097631	17098131	501	*	1.79	2.61	-0.34	2.95	0.00989	0.0373	3	3	8	5.34	4.98	1.79	0.38	0.2	+	+	+	+	+	+	Rbp6
chr2R	6610463	6610963	501	*	5.4	4.81	5.82	-1.01	0.00997	0.0376	1	3	15	28.68	40.35	49.21	69.78	49.91	-	-	+	+	+	+	jing
chrX	10257354	10257854	501	*	3.84	4.42	2.87	1.55	0.01	0.0378	2	2	27	26.68	10.46	12.08	4.53	5.28	+	+	-	+	+	-	Hk
chr3L	19908908	19909408	501	*	4.08	3.19	4.63	-1.45	0.0101	0.0379	0	2	3	13.34	10.96	18.79	29.8	25.77	-	-	-	-	+	+	Su(Tpl)
chrX	6853337	6853837	501	*	4.68	3.88	5.19	-1.32	0.0101	0.0381	1	3	10	6.67	27.4	28.19	38.85	42.81	-	-	+	+	+	+	CG14434
chrX	1986027	1986527	501	*	4.67	5.23	3.75	1.48	0.0101	0.0381	2	0	72	25.34	14.94	10.07	23.38	6.9	+	+	-	-	-	-	Hr4
chr2L	16323481	16323981	501	*	4.38	3.67	4.86	-1.19	0.0101	0.0381	0	3	8	14.67	15.44	31.32	24.14	31.65	-	-	-	+	+	+	cact
chr2L	7219251	7219751	501	*	5.05	4.48	5.45	-0.98	0.0101	0.0381	1	3	16	21.34	29.39	45.41	47.9	38.15	-	-	+	+	+	+	CG13784
chr3R	28844243	28844743	501	*	4	3.22	4.51	-1.29	0.0102	0.0381	0	3	9	10	8.97	18.12	26.78	23.33	-	-	-	+	+	+	Apc
chr3L	22132664	22133164	501	*	3.83	3	4.36	-1.36	0.0102	0.0384	0	2	11	6	6.97	18.34	25.65	17.45	-	-	-	+	+	-	olf413
chr2L	18151323	18151823	501	*	5.24	4.63	5.66	-1.03	0.0103	0.0387	1	3	14	24.67	35.86	38.03	55.82	58.03	-	-	+	+	+	+	CG17681
chr2R	22802920	22803420	501	*	6.18	5.72	6.53	-0.81	0.0103	0.0388	3	3	47	60.02	50.81	69.34	108.63	99.63	+	+	+	+	+	+
chr2L	713416	713916	501	*	4.23	3.36	4.77	-1.42	0.0104	0.0388	1	3	7	5.34	18.43	22.59	33.57	25.97	-	-	+	+	+	+	FBgn0266323
chrX	4910362	4910862	501	*	4.59	3.94	5.03	-1.09	0.0104	0.0388	1	3	17	10.67	18.43	26.62	34.32	37.13	-	-	+	+	+	+	CG32772
chrX	5770731	5771231	501	*	4.23	3.25	4.81	-1.56	0.0104	0.0389	0	3	14	0.67	13.95	24.61	29.8	29.83	-	-	-	+	+	+	CG3097
chr2R	21545350	21545850	501	*	6.21	5.64	6.62	-0.98	0.0104	0.039	2	3	21	71.36	56.79	97.75	95.42	101.86	-	+	+	+	+	+	Egfr
chrX	8806503	8807003	501	*	4.07	3.19	4.62	-1.43	0.0105	0.039	0	3	3	11.34	12.95	27.96	25.65	20.09	-	-	-	+	+	+	Lim1
chr4	607428	607928	501	*	3.5	2.49	4.09	-1.6	0.0105	0.039	0	2	4	9.34	3.49	15.88	13.58	21.71	-	-	-	+	-	+	Eph
chr2R	6281963	6282463	501	*	3.16	2.02	3.79	-1.77	0.0105	0.039	0	3	4	4.67	3.49	11.41	19.61	10.55	-	-	-	+	+	+
chr3R	31690223	31690723	501	*	3.41	1.95	4.12	-2.17	0.0105	0.039	0	2	1	0.67	9.96	9.62	24.52	18.06	-	-	-	-	+	+	FBgn0267124
chr3R	9236865	9237365	501	*	4.21	3.47	4.69	-1.22	0.0106	0.0395	0	3	10	9.34	13.95	23.71	30.17	23.74	-	-	-	+	+	+	pum
chrX	13128708	13129208	501	*	3.84	2.88	4.41	-1.53	0.0106	0.0395	0	3	3	12.67	6.48	14.76	24.52	24.55	-	-	-	+	+	+	CG15717
chr2L	21860550	21861050	501	*	4.25	3.55	4.72	-1.17	0.0106	0.0395	2	3	12	12.67	10.46	22.15	30.93	25.97	+	-	+	+	+	+	FBgn0266222
chr3R	19321571	19322071	501	*	4.13	3.31	4.65	-1.34	0.0106	0.0395	0	3	8	15.34	6.48	26.17	31.31	17.86	-	-	-	+	+	+	Dl
chr2R	17823697	17824197	501	*	6.23	5.67	6.63	-0.96	0.0107	0.0395	2	3	24	57.35	71.23	111.4	97.69	88.06	-	+	+	+	+	+	grh
chrX	7608272	7608772	501	*	4.69	3.99	5.16	-1.17	0.0107	0.0398	1	3	10	11.34	26.4	35.34	35.45	36.73	-	-	+	+	+	+	ct
chr3L	9462048	9462548	501	*	4.96	4.42	5.36	-0.94	0.0108	0.0398	2	3	27	15.34	21.92	37.8	38.85	46.26	-	+	+	+	+	+	CG3434
chr3L	12676639	12677139	501	*	2.94	1.61	3.62	-2.01	0.0108	0.0398	0	2	4	0.67	4.48	12.3	10.56	14	-	-	-	+	-	+
chr3R	14716048	14716548	501	*	3.59	2.5	4.2	-1.7	0.0108	0.0398	0	2	2	4	10.96	19.68	17.35	18.06	-	-	-	+	-	+	kibra
chrX	13629164	13629664	501	*	8.28	8.83	7.38	1.44	0.0108	0.0398	3	3	766	352.11	242.58	133.32	301.36	66.35	+	+	+	+	+	+	NFAT
chr3R	5038842	5039342	501	*	5.91	5.32	6.32	-1	0.0108	0.0399	2	3	21	49.35	49.81	54.58	75.06	110.38	-	+	+	+	+	+
chr3R	30273654	30274154	501	*	5.13	4.63	5.5	-0.86	0.0108	0.04	1	3	26	28.01	20.42	42.95	46.02	46.47	-	+	-	+	+	+	FBgn0267782
chr2L	17477572	17478072	501	*	3.65	2.71	4.21	-1.5	0.0109	0.0401	0	2	4	8.67	6.97	16.33	15.09	24.15	-	-	-	+	-	+	cass
chr2R	16096380	16096880	501	*	3.86	3.07	4.37	-1.3	0.0109	0.0401	0	2	11	6.67	7.47	22.82	19.99	19.07	-	-	-	+	-	+	Dg
chr3L	21498344	21498844	501	*	5.39	5.86	4.7	1.16	0.0109	0.0401	3	3	80	62.02	32.38	18.79	46.02	13.19	+	+	+	+	+	+	Hr78
chr3L	8449932	8450432	501	*	5.13	4.6	5.52	-0.93	0.011	0.0404	1	3	18	32.68	21.92	41.83	50.16	45.86	-	+	-	+	+	+	Gug
chr2R	12991556	12992056	501	*	4.75	3.9	5.28	-1.38	0.011	0.0404	3	3	2	22.01	20.92	28.41	47.15	40.99	+	+	+	+	+	+	CG33798
chr3L	15802061	15802561	501	*	3.98	3.22	4.47	-1.25	0.011	0.0404	0	2	11	8	8.97	20.58	21.12	24.75	-	-	-	+	-	+
chrX	1020866	1021366	501	*	3.79	4.36	2.81	1.55	0.011	0.0404	3	3	31	15.34	15.44	4.25	13.2	3.65	+	+	+	+	+	+	su(w[a])
chr3R	25472254	25472754	501	*	6.03	5.56	6.39	-0.83	0.011	0.0404	2	3	35	48.02	58.28	67.78	93.92	89.89	-	+	+	+	+	+	Fur1
chr3L	1923520	1924020	501	*	3.38	3.94	2.45	1.49	0.011	0.0405	2	0	19	14.67	12.45	6.04	4.9	5.48	+	-	+	-	-	-	FBgn0052312
chrY	742939	743439	501	*	4.38	4.92	3.5	1.42	0.0111	0.0405	3	3	47	29.34	14.45	6.71	20.37	6.9	+	+	+	+	+	+
chr3L	14757705	14758205	501	*	5.39	4.85	5.77	-0.92	0.0111	0.0406	1	3	18	35.34	33.37	45.41	64.87	53.97	-	-	+	+	+	+	Trl
chrX	3719380	3719880	501	*	4.31	3.44	4.86	-1.42	0.0111	0.0406	3	3	2	16.01	14.45	23.49	30.93	32.46	+	+	+	+	+	+	Rala
chr3R	5076669	5077169	501	*	3.29	2.09	3.94	-1.85	0.0112	0.0408	0	2	1	5.34	6.48	19.68	15.84	10.55	-	-	-	+	+	-
chr3R	29841181	29841681	501	*	2.63	1.04	3.37	-2.33	0.0112	0.0408	1	2	5	0.67	0.5	6.04	16.22	8.72	+	-	-	+	+	-	Cad99C
chr3L	7764646	7765146	501	*	1.11	2.02	-1.9	3.92	0.0112	0.041	1	1	11	0.67	0.5	0.22	0.38	0.2	+	-	-	+	-	-	Clk
chr2L	18449017	18449517	501	*	4.18	3.27	4.73	-1.46	0.0112	0.041	0	2	3	8	17.93	26.4	23.38	30.03	-	-	-	+	-	+	ncm
chr2R	22515533	22516033	501	*	3.96	3.12	4.49	-1.37	0.0112	0.041	0	2	8	6.67	11.46	18.57	17.35	31.65	-	-	-	+	-	+	px
chr3R	11760633	11761133	501	*	3.66	2.66	4.24	-1.58	0.0113	0.041	0	2	7	2	9.96	15.21	18.86	22.73	-	-	-	+	-	+	Lk6
chr2L	6179035	6179535	501	*	4.17	3.29	4.71	-1.41	0.0114	0.0414	0	2	6	6	17.43	21.7	23.38	33.28	-	-	-	+	-	+	smal
chr3L	22176550	22177050	501	*	3.92	3	4.48	-1.48	0.0114	0.0415	0	3	2	12	9.96	23.71	21.5	21.71	-	-	-	+	+	+	olf413
chr2L	5305210	5305710	501	*	5.29	4.63	5.75	-1.12	0.0114	0.0415	1	3	8	25.34	40.85	53.01	49.03	59.25	-	-	+	+	+	+	vri
chr3L	618804	619304	501	*	4.35	3.66	4.81	-1.15	0.0114	0.0415	0	2	16	12	9.96	33.78	30.17	20.29	-	-	-	+	+	-	FBgn0261636
chrX	1779531	1780031	501	*	3.35	3.99	2.14	1.86	0.0115	0.0417	2	1	27	15.34	5.48	1.57	7.17	4.46	+	+	-	-	+	-	Adar
chr2R	7481941	7482441	501	*	3.98	3.06	4.54	-1.48	0.0115	0.0417	0	2	9	14	1.99	24.16	19.99	25.57	-	-	-	+	-	+	wech
chr3R	12278926	12279426	501	*	3.6	2.43	4.23	-1.81	0.0115	0.0417	0	2	5	0.67	10.46	12.53	23.01	20.9	-	-	-	+	-	+	svp
chrX	9326071	9326571	501	*	3.79	4.38	2.79	1.59	0.0115	0.0417	3	2	36	16.01	10.46	9.4	8.3	3.04	+	+	+	+	+	-	CG34449
chr2L	10935229	10935729	501	*	3.71	4.33	2.57	1.76	0.0115	0.0418	3	3	37	16.01	7.47	2.24	11.32	4.26	+	+	+	+	+	+	CG14072
chrX	9127598	9128098	501	*	5.01	4.33	5.47	-1.14	0.0116	0.0421	2	3	7	27.34	25.9	34.9	55.07	43.02	-	+	+	+	+	+	fend
chr3R	22134203	22134703	501	*	6.34	5.89	6.69	-0.8	0.0117	0.0421	3	3	43	70.69	63.76	91.27	112.77	104.7	+	+	+	+	+	+	SKIP
chr3L	9491257	9491757	501	*	4.54	3.86	5	-1.15	0.0117	0.0423	1	3	10	12	21.42	29.97	35.45	30.64	-	-	+	+	+	+	CG32036
chr3L	3876857	3877357	501	*	2.94	1.58	3.62	-2.04	0.0117	0.0424	1	3	1	6	1.99	9.62	13.96	13.39	+	-	-	+	+	+
chr2R	5392661	5393161	501	*	3.74	4.33	2.73	1.6	0.0118	0.0425	3	3	33	15.34	11.95	3.36	12.45	4.06	+	+	+	+	+	+
chr3L	25012265	25012765	501	*	3.64	4.26	2.5	1.76	0.0118	0.0425	3	3	36	14.67	6.97	3.8	10.56	2.64	+	+	+	+	+	+
chrX	16607827	16608327	501	*	4.33	3.59	4.81	-1.22	0.0118	0.0425	0	3	17	12.67	6.48	23.93	38.09	22.12	-	-	-	+	+	+	mbt
chrX	19850750	19851250	501	*	3.94	3.05	4.48	-1.43	0.0118	0.0426	0	2	6	7.34	11.46	18.34	32.81	15.83	-	-	-	+	-	+	Nup205
chr3R	22727447	22727947	501	*	3.6	2.63	4.17	-1.54	0.0118	0.0426	0	2	4	4.67	9.96	16.55	18.48	19.07	-	-	-	+	-	+	Irp-1A
chr3R	15419108	15419608	501	*	5.11	4.5	5.54	-1.05	0.0119	0.0426	0	3	12	21.34	34.37	41.16	55.82	42.81	-	-	-	+	+	+	FBgn0262367
chr2R	23632172	23632672	501	*	3.3	2.15	3.93	-1.78	0.0119	0.0426	0	3	4	3.33	5.98	9.17	24.89	11.77	-	-	-	+	+	+	retn
chr2R	17962502	17963002	501	*	2.69	3.51	0.57	2.94	0.0119	0.0426	2	0	21	12.67	0.5	0.22	0.38	3.86	+	+	-	-	-	-
chr2L	19137462	19137962	501	*	3.91	3.09	4.43	-1.35	0.0119	0.0427	0	3	11	4	10.46	22.37	23.38	19.07	-	-	-	+	+	+	brat
chrX	4936092	4936592	501	*	3.82	2.7	4.44	-1.74	0.0119	0.0427	0	3	1	4	14.45	18.34	25.27	21.51	-	-	-	+	+	+	Ptp4E
chr2L	5979807	5980307	501	*	5.2	4.45	5.69	-1.24	0.0119	0.0427	0	3	28	4	33.37	49.21	61.86	43.62	-	-	-	+	+	+	chic
chr2L	21853295	21853795	501	*	3.6	2.56	4.2	-1.65	0.012	0.043	0	2	9	0.67	7.97	15.88	17.73	21.71	-	-	-	+	-	+	FBgn0266222
chr3L	10660770	10661270	501	*	4.76	4.13	5.2	-1.08	0.012	0.043	1	3	13	14	25.4	29.97	38.85	41.6	-	-	+	+	+	+	CG8003
chrX	13601459	13602331	873	*	5.94	6.58	4.78	1.81	0.0121	0.0431	3	3	176	64.02	47.32	20.36	45.64	16.23	+	+	+	+	+	+	up
chr2L	5052369	5052869	501	*	3.37	2.41	3.95	-1.53	0.0121	0.0432	0	2	6	4	5.98	14.76	15.84	15.62	-	-	-	+	-	+	His3.3B
chr2R	15349905	15350405	501	*	3.32	2.17	3.95	-1.79	0.0121	0.0433	0	2	2	4	7.47	12.08	12.07	22.32	-	-	-	+	-	+	unc-5
chr2L	9089588	9090088	501	*	0.96	1.85	-1.9	3.75	0.0121	0.0433	3	0	1	9.34	0.5	0.22	0.38	0.2	+	+	+	-	-	-
chrX	4908841	4909341	501	*	3.61	2.54	4.22	-1.68	0.0121	0.0433	0	2	1	6	10.46	18.57	20.37	17.04	-	-	-	+	+	-	CG32772
chr2R	5671428	5671928	501	*	3.78	2.51	4.44	-1.93	0.0122	0.0433	0	2	2	0.67	14.45	15.43	21.5	28.41	-	-	-	+	-	+	kune
chr2L	6647268	6647768	501	*	4.92	4.27	5.36	-1.1	0.0122	0.0434	1	3	9	19.34	29.39	35.79	44.88	42.81	-	-	+	+	+	+	Tango1
chr2R	11892726	11893226	501	*	4.25	3.52	4.73	-1.22	0.0122	0.0434	0	3	9	17.34	7.97	22.82	27.53	29.42	-	-	-	+	+	+	FBgn0015543
chr3L	25785036	25785536	501	*	1.84	2.66	-0.24	2.9	0.0123	0.0436	2	0	10	8	1	0.22	1.51	0.81	+	+	-	-	-	-
chrX	10807821	10808321	501	*	3.65	2.78	4.18	-1.4	0.0123	0.0436	0	2	6	8.67	5.98	19.46	15.09	19.88	-	-	-	+	-	+	Imp
chr3R	27441165	27441665	501	*	5.06	4.54	5.45	-0.9	0.0123	0.0436	1	3	27	16.01	26.9	40.04	44.51	46.26	-	-	+	+	+	+	CG43447
chr2R	5340741	5341241	501	*	4.17	3.3	4.71	-1.41	0.0123	0.0436	0	2	3	12	14.45	18.79	26.78	32.87	-	-	-	+	-	+	CG10465
chrUn_DS485026v1	541	1041	501	*	2.7	1.25	3.4	-2.15	0.0123	0.0436	0	3	3	0.67	3.49	9.17	12.82	9.74	-	-	-	+	+	+
chr3L	18625761	18626261	501	*	3.32	1.89	4.02	-2.13	0.0124	0.0438	0	2	1	0.67	9.46	9.84	17.73	21.1	-	-	-	+	+	-	MYPT-75D
chr3R	6425981	6426481	501	*	3.67	2.75	4.22	-1.48	0.0124	0.0438	0	2	10	4.67	5.48	11.63	16.6	27.8	-	-	-	+	-	+	gpp
chrX	6988604	6989104	501	*	4.97	4.38	5.39	-1.01	0.0124	0.0438	1	3	16	18.67	27.89	30.2	49.41	46.47	-	-	+	+	+	+	ogre
chr2R	8657742	8658242	501	*	5.78	5.31	6.13	-0.82	0.0124	0.044	2	3	34	52.02	32.88	56.59	80.72	73.25	-	+	+	+	+	+	ptc
chr3R	17893564	17894064	501	*	2.47	3.3	0.31	2.99	0.0125	0.0441	1	1	19	10	0.5	3.13	0.38	0.2	+	-	-	+	-	-	Rim
chr3R	8277747	8278247	501	*	5.69	5.21	6.05	-0.85	0.0125	0.0441	2	3	27	51.35	32.38	71.58	55.82	71.63	-	+	+	+	+	+	ato
chr3R	8477207	8477707	501	*	4.76	4.07	5.22	-1.15	0.0125	0.0441	1	3	12	12	26.4	25.28	44.51	42.41	-	-	+	+	+	+	CG45263
chrX	6861590	6862090	501	*	4.2	3.26	4.76	-1.49	0.0125	0.0441	0	2	1	13.34	14.45	22.37	27.91	30.84	-	-	-	+	-	+	CG14434
chr2R	20646094	20646594	501	*	5.64	5.11	6.02	-0.91	0.0126	0.0443	1	3	40	19.34	44.33	54.58	58.46	81.57	-	-	+	+	+	+	Lrt
chr2L	2756148	2756648	501	*	3.94	3.16	4.44	-1.28	0.0126	0.0445	0	2	11	9.34	6.48	20.58	27.53	17.04	-	-	-	+	-	+	Bacc
chr2R	2106843	2107343	501	*	4.7	5.24	3.82	1.42	0.0127	0.0445	2	3	66	32.01	15.44	9.62	26.4	6.49	+	-	+	+	+	+	CG17684
chr3L	3096101	3096601	501	*	4.19	3.39	4.71	-1.32	0.0127	0.0445	3	3	5	12	14.45	20.13	24.52	33.68	+	+	+	+	+	+	Cht7
chrX	2317243	2317743	501	*	3.9	3.03	4.44	-1.41	0.0127	0.0446	0	2	8	4	12.45	18.34	27.16	19.68	-	-	-	+	+	-	Raf
chr2L	19324650	19325150	501	*	3.8	2.96	4.32	-1.37	0.0127	0.0447	0	3	6	7.34	9.96	17.67	23.76	18.67	-	-	-	+	+	+	FBgn0266796
chr3R	14283302	14283802	501	*	3.94	3.12	4.45	-1.33	0.0127	0.0447	0	2	9	10.67	6.48	21.25	29.42	15.02	-	-	-	+	-	+	trx
chr2L	3303085	3303585	501	*	3.67	2.5	4.31	-1.81	0.0128	0.0447	0	2	1	4	11.95	10.51	24.14	24.96	-	-	-	+	-	+	CG9663
chrX	11382537	11383037	501	*	4.65	5.17	3.84	1.33	0.0128	0.0448	3	3	69	22.01	16.94	13.2	20.37	9.33	+	+	+	+	+	+	dlg1
chr2R	14000733	14001233	501	*	5.12	4.58	5.52	-0.93	0.0128	0.0449	2	3	33	18.01	20.92	38.7	60.35	38.15	+	-	+	+	+	+	mam
chr2R	10023752	10024252	501	*	4.42	4.98	3.47	1.51	0.0128	0.0449	3	3	69	10	15.94	10.29	10.56	12.38	+	+	+	+	+	+	Pka-R2
chr3L	22400793	22401293	501	*	5.36	4.73	5.8	-1.07	0.0129	0.0452	1	3	9	44.01	26.4	49.44	53.94	63.51	-	+	-	+	+	+	Ten-m
chrX	2841425	2841925	501	*	2.5	3.2	1.06	2.15	0.013	0.0455	3	3	15	8.67	3.98	1.57	2.64	2.03	+	+	+	+	+	+	kirre
chr2R	12996246	12996746	501	*	4.69	3.95	5.17	-1.22	0.0131	0.0456	0	3	4	22.01	20.42	35.79	32.81	39.77	-	-	-	+	+	+	Su(z)2
chrX	2919402	2919902	501	*	3.77	4.37	2.7	1.68	0.0131	0.0457	2	0	32	22.67	7.47	5.14	12.07	2.23	+	-	+	-	-	-	CG3588
chr3L	4314300	4314800	501	*	3.41	2.13	4.08	-1.95	0.0131	0.0457	0	2	12	0.67	0.5	21.92	16.6	12.17	-	-	-	+	+	-	Claspin
chrX	18562414	18562914	501	*	1.59	2.44	-0.82	3.26	0.0131	0.0458	3	2	13	1.33	1.99	1.12	0.38	0.2	+	+	+	+	+	-	FBgn0052546
[truncated: 5,722 more rows]

## Sheet: CLAMP in MTD vs zldi 0-2hr
seqnames	start	end	width	strand	Conc	Conc_ZLDi	Conc_MTD	Fold	p.value	FDR	Called1	Called2	ZldRNAi_0.2hr_1	ZldRNAi_0.2hr_2	ZldRNAi_0.2hr_3	MTD_0.2hr_1	MTD_0.2hr_2	MTD_0.2hr_3	ZldRNAi_0.2hr_1.1	ZldRNAi_0.2hr_2.1	ZldRNAi_0.2hr_3.1	MTD_0.2hr_1.1	MTD_0.2hr_2.1	MTD_0.2hr_3.1	anno_MTD_ZLDi1_all_gene
[truncated: 4,628 more rows]

[truncated: 1 more sheets: CLAMP in MTD vs zldi 2-4hr]
