# Supplementary material for: CLAMP and Zelda function together to promote Drosophila zygotic genome activation
Source: eLife journal article supplement (doi:10.7554/elife.69937), 2021-08-03
Supplement: supp [file elife-69937-supp-v1.zip › elife_poa_e69937_Table_2_source_data_1.xlsx]

## Sheet: Type I n=5
ATAC-seq (MTD vs. clamp-i DA)								ChIP-seq (CLAMP)				ATAC-seq (wt vs. zld- DA)							ChIP-seq (ZLD)
Chromosome	ChromStart	ChromEnd	ATACpeakSize	FC	p.value	FDR	GeneName	Chromosome	ChromStart	ChromEnd	PeakScore	Chromosome	ChromStart	ChromEnd	ATACpeakSize	FC	FDR	GeneName	Chromosome	ChromStart	ChromEnd	PeakScore
chr2L	3611892	3612092	201	-1.07438	1.65933e-05	0.00790308	NA	chr2L	3611854	3612140	79.356	chr2L	3611981	3612094	114	-0.6015	0.03605	NA	chr2L	3611893	3612197	91.962
chr2L	19154905	19155105	201	-1.06038	3.25267e-05	0.0112668	brat	chr2L	19154806	19155329	276.025	chr2L	19154714	19155444	731	-0.6135	0.0101	brat	chr2L	19154865	19155438	115.211
chr2L	4055860	4056060	201	-0.86122	0.000660632	0.061927	ed	chr2L	4055895	4056043	48.172	chr2L	4055737	4056081	345	-1.5159	1.75e-12	ed	chr2L	4055763	4056018	61.145
chr2L	5742	5942	201	-0.831877	0.000713401	0.0639873	FBgn0031208	chr2L	5494	5947	127.998	chr2L	5506	6046	541	-0.7459	0.0206	FBgn0031208	chr2L	5532	5932	117.572
chr2R	13992399	13992599	201	-0.850302	0.000811981	0.0691126	mam	chr2R	13992373	13992660	208.769	chr2R	13992375	13992706	332	-0.4476	0.01943	mam	chr2R	13992376	13992717	102.581

## Sheet: Type II n=23
ATAC-seq (MTD vs. clamp-i DA)								ChIP-seq (CLAMP)				ATAC-seq (wt vs. zld- non-DA)							ChIP-seq (ZLD)
Chromosome	ChromStart	ChromEnd	ATACpeakSize	FC	p.value	FDR	GeneName	Chromosome	ChromStart	ChromEnd	PeakScore	Chromosome	ChromStart	ChromEnd	ATACpeakSize	FC	FDR	GeneName	Chromosome	ChromStart	ChromEnd	PeakScore
chr4	989504	989704	201	-1.27897	3.7732e-07	0.000958457	toy	chr4	989402	989780	533.105	chr4	989399	989772	374	0.1201	0.8194	toy	chr4	989421	989736	210.871
chr3R	24630083	24630283	201	-1.13569	8.16833e-06	0.00582331	atl	chr3R	24630036	24630326	184.89	chr3R	24630031	24630620	590	0.2862	0.3919	atl	chr3R	24630056	24630269	44.387
chr3L	14599599	14599799	201	-1.10758	1.11261e-05	0.00644771	HGTX	chr3L	14599569	14600009	214.895	chr3L	14599454	14599938	485	0.4361	0.2102	HGTX	chr3L	14599524	14599906	215.041
chr3R	9808989	9809189	201	-1.10785	1.24447e-05	0.00677389	FBXO11	chr3R	9808768	9809426	299.958	chr3R	9808964	9809177	214	0.4022	0.1156	FBXO11	chr3R	9808974	9809536	64.01
chr3L	14131742	14131942	201	-1.10041	1.52008e-05	0.00747342	Sox21b	chr3L	14131564	14132045	889.25	chr3L	14131718	14131938	221	0.4914	0.05609	Sox21b	chr3L	14131625	14132016	217.845
chr3R	4835387	4835587	201	-1.05245	3.58982e-05	0.0121583	NA	chr3R	4835325	4835670	508.622	chr3R	4835336	4835832	497	0.3703	0.2843	NA	chr3R	4835307	4835666	262.545
chr3L	10850129	10850329	201	-1.00515	6.20162e-05	0.0192896	tna	chr3L	10849773	10850200	171.561	chr3L	10850199	10850366	168	-0.3641	0.3165	tna	chr3L	10849837	10850294	37.761
chr3R	8140053	8140253	201	-0.999673	7.16348e-05	0.0209959	FBgn0011959	chr3R	8140221	8140358	55.087	chr3R	8140229	8140358	130	-0.4774	0.4702	FBgn0011959	chr3R	8140229	8140608	82.49
chr3R	16923631	16923831	201	-0.958836	0.000118481	0.0261837	FBgn0264857	chr3R	16923572	16923931	151.358	chr3R	16923204	16923974	771	0.4156	0.05498	FBgn0264857	chr3R	16923602	16923876	106.162
chr3L	14153090	14153290	201	-0.940618	0.0001859	0.0311351	NA	chr3L	14153081	14153274	105.533	chr3L	14153138	14153295	158	0.0391	0.8886	NA	chr3L	14153106	14154199	120.88
chrX	6855697	6855897	201	-0.928854	0.000265565	0.0392959	CG14434	chrX	6855481	6856030	451.187	chrX	6855630	6856029	400	-0.004	1	CG14434	chrX	6855641	6856034	192.166
chr3L	14003599	14003799	201	-0.883683	0.000398291	0.0493525	Nprl3	chr3L	14003632	14003818	38.555	chr3L	14003620	14003808	189	0.2846	0.2548	Nprl3	chr3L	14003764	14004317	86.786
chr2R	11475147	11475347	201	-0.89404	0.000407119	0.0494112	inv	chr2R	11475141	11475816	688.266	chr2R	11475130	11475369	240	0.5557	0.06397	inv	chr2R	11475234	11475832	194.414
chr3L	10849839	10850039	201	-0.890518	0.000439826	0.0515812	tna	chr3L	10849773	10850200	171.561	chr3L	10849852	10850017	166	0.2501	0.4546	tna	chr3L	10849837	10850294	37.761
chr2R	9692626	9692826	201	-0.873052	0.000595221	0.0600779	Uba1	chr2R	9692434	9693288	241.526	chr2R	9692380	9692948	569	-0.0353	0.9283	Uba1	chr2R	9692541	9693014	116.346
chr2R	24814631	24814831	201	-0.860482	0.000666362	0.061927	Dll	chr2R	24814430	24814848	298.115	chr2R	24814515	24814937	423	0.3696	0.4839	Dll	chr2R	24814444	24814964	235.621
chrX	6866171	6866371	201	-0.849136	0.000792002	0.0681971	CG14434	chrX	6866106	6866379	83.422	chrX	6866084	6866383	300	-0.0126	1	CG14434	chrX	6866140	6866380	37.869
chr3L	8458843	8459043	201	-0.832608	0.00101983	0.076768	Gug	chr3L	8458956	8459093	42.1	chr3L	8458785	8459196	412	0.3404	0.2317	Gug	chr3L	8458915	8459139	37.869
chr2R	19266193	19266393	201	-0.798011	0.00156065	0.0923356	NA	chr2R	19266102	19266464	156.951	chr2R	19266169	19266475	307	0.2506	0.4301	NA	chr2R	19266026	19266397	78.332
chr3R	5021578	5021778	201	-0.79518	0.00169791	0.0957635	NA	chr3R	5021610	5021872	39.907	chr3R	5021510	5022150	641	0.2697	0.5195	NA	chr3R	5021589	5021867	41.157
chr2R	20831846	20832046	201	-0.789634	0.00175482	0.0972551	insc	chr2R	20831799	20832166	184.725	chr2R	20831797	20832052	256	-0.1343	0.6617	insc	chr2R	20831873	20832113	97.59
chr3R	16886591	16886791	201	-0.784651	0.00178068	0.0979759	FBgn0264857	chr3R	16886511	16886806	274.138	chr3R	16886492	16886828	337	-0.3643	0.1706	FBgn0264857	chr3R	16886432	16886839	382.893
chr2R	13621313	13621513	201	-0.790108	0.00181794	0.0989545	CG17716	chr2R	13621254	13621600	409.01	chr2R	13621180	13621664	485	-0.2759	0.4451	CG17716	chr2R	13621294	13621609	91.962

## Sheet: Type III n=123
ATAC-seq (MTD vs. clamp-i non-DA)								ChIP-seq (CLAMP)				ATAC-seq (wt vs. zld- DA)							ChIP-seq (ZLD)
Chromosome	ChromStart	ChromEnd	ATACpeakSize	FC	p.value	FDR	GeneName	Chromosome	ChromStart	ChromEnd	PeakScore	Chromosome	ChromStart	ChromEnd	ATACpeakSize	FC	FDR	GeneName	Chromosome	ChromStart	ChromEnd	PeakScore
chr3L	14638174	14638374	201	-0.774689	0.00203629	0.100831	dlp	chr3L	14638190	14638578	65.75	chr3L	14638038	14638508	471	-1.7185	4.2e-09	dlp	chr3L	14638126	14638382	38.358
chr3R	19934941	19935141	201	-0.778494	0.00201607	0.100831	mira	chr3R	19934952	19935165	90.748	chr3R	19934831	19935223	393	-1.1693	5.65e-08	mira	chr3R	19934921	19935198	96.635
chr2L	9496391	9496591	201	-0.738556	0.00267797	0.109717	Gdi	chr2L	9496316	9496668	193.612	chr2L	9496383	9496698	316	-0.8557	0.0003323	Gdi	chr2L	9496387	9496646	37.869
chr3L	11927378	11927578	201	-0.67253	0.00767996	0.16066	byn	chr3L	11927353	11927553	85.788	chr3L	11927250	11927884	635	-1.1965	1.56e-11	byn	chr3L	11927245	11927732	247.438
chr2R	14311697	14311897	201	-0.645157	0.00967396	0.168054	Shrm	chr2R	14311670	14311863	66.542	chr2R	14311394	14311972	579	-2.4915	6.96e-41	Shrm	chr2R	14311502	14311931	102.48
chr2R	16517113	16517313	201	-0.645244	0.0103828	0.170161	Sema2a	chr2R	16517072	16517357	289.284	chr2R	16517094	16517381	288	-0.7173	0.001179	Sema2a	chr2R	16516924	16517394	70.592
chrX	12258703	12258903	201	-0.645807	0.0104634	0.170277	Ten-a	chrX	12258661	12258928	180.56	chrX	12258548	12259001	454	-0.7777	0.009229	Ten-a	chrX	12258665	12258802	60.319
chr3L	24723788	24723988	201	-0.637249	0.0114853	0.176893	scro	chr3L	24723743	24724059	250.969	chr3L	24723705	24724212	508	-0.5317	0.02259	scro	chr3L	24723734	24724144	226.042
chr2L	1117528	1117728	201	-0.608708	0.0134838	0.188456	Pino	chr2L	1117578	1117719	72.975	chr2L	1117497	1117715	219	-2.4796	7.59e-21	Pino	chr2L	1117586	1117725	96.868
chr3L	22400858	22401058	201	-0.620007	0.0137669	0.188717	Ten-m	chr3L	22400888	22401065	99.379	chr3L	22400778	22401302	525	-0.827	0.00102	Ten-m	chr3L	22399970	22401264	120.88
chr2R	17813969	17814169	201	-0.616153	0.0138131	0.188717	grh	chr2R	17813923	17814273	288.916	chr2R	17813927	17814199	273	-0.8249	0.0001839	grh	chr2R	17813975	17814174	45.255
chr2L	11971147	11971347	201	-0.619902	0.0139022	0.188717	FBgn0263019	chr2L	11970781	11971369	159.505	chr2L	11970789	11971438	650	-0.7779	3.35e-05	FBgn0263019	chr2L	11970779	11971335	122.203
chr2R	13565728	13565928	201	-0.598645	0.0154199	0.191224	NA	chr2R	13565775	13566035	86.559	chr2R	13565699	13566204	506	-1.9649	9.2e-18	NA	chr2R	13565755	13566215	119
chr2L	4031782	4031982	201	-0.576363	0.019399	0.203564	ed	chr2L	4031325	4032028	321.089	chr2L	4031747	4032119	373	-0.5531	0.01651	ed	chr2L	4031178	4032134	318.788
chr2R	8655819	8656019	201	-0.575964	0.0203983	0.205143	ptc	chr2R	8655685	8656147	267.581	chr2R	8655506	8656387	882	-1.6627	2.24e-26	ptc	chr2R	8655399	8656945	381.121
chr3L	10860134	10860334	201	-0.583157	0.0204294	0.205143	tna	chr3L	10860133	10860443	78.923	chr3L	10860093	10860556	464	-1.483	1.04e-15	tna	chr3L	10860077	10861205	122.542
chr3L	10858818	10859018	201	-0.559988	0.0223208	0.210473	tna	chr3L	10858729	10858966	151.938	chr3L	10858848	10858938	91	-0.831	0.01881	tna	chr3L	10858762	10859029	54.349
chr3R	8277872	8278072	201	-0.555642	0.0226432	0.210687	ato	chr3R	8277981	8278133	42.1	chr3R	8277742	8278211	470	-1.3396	1.91e-14	ato	chr3R	8277351	8278246	305.819
chr2L	9454462	9454662	201	-0.568642	0.0236759	0.213465	numb	chr2L	9454477	9454752	39.907	chr2L	9454270	9454952	683	-2.07	2.27e-32	numb	chr2L	9454264	9454896	140.097
chr3L	14150196	14150396	201	-0.549639	0.0286722	0.226397	NA	chr3L	14150085	14150603	118.701	chr3L	14149778	14150599	822	-1.0138	1.12e-13	NA	chr3L	14149904	14150592	157.023
chr2R	10078164	10078364	201	-0.543824	0.0294754	0.229462	CG1371	chr2R	10078163	10078343	61.74	chr2R	10078112	10078487	376	-0.5295	0.04361	CG1371	chr2R	10078164	10078559	87.353
chr2L	5001310	5001510	201	-0.522611	0.0310343	0.233333	Rtnl1	chr2L	5001418	5001545	38.555	chr2L	5001340	5001461	122	-0.9428	0.001079	Rtnl1	chr2L	5001308	5001608	58.477
chr3R	21824960	21825160	201	0.532567	0.0327905	0.235514	CASK	chr3R	21824662	21825124	108.648	chr3R	21824754	21825204	451	-1.0744	1.37e-06	CASK	chr3R	21824649	21825205	46.877
chr2R	21250881	21251081	201	-0.533306	0.0336614	0.237316	ASPP	chr2R	21250852	21251166	285.382	chr2R	21250764	21251276	513	-0.8278	1.01e-05	ASPP	chr2R	21250486	21251182	146.76
chr3L	16769952	16770152	201	-0.515868	0.034452	0.238538	Nrt	chr3L	16769875	16770269	237.037	chr3L	16769848	16770152	305	-0.7169	0.003524	Nrt	chr3L	16769825	16770202	69.589
chr3R	13072066	13072266	201	-0.521989	0.035386	0.240204	sim	chr3R	13072079	13072534	72.846	chr3R	13071948	13072526	579	-1.5205	6.36e-18	sim	chr3R	13072080	13072496	57.042
chr2L	13244445	13244645	201	-0.503682	0.0384911	0.244945	FBgn0003935	chr2L	13244450	13244614	75.613	chr2L	13244549	13245259	711	-1.242	5.56e-09	FBgn0003935	chr2L	13244293	13245060	164.267
chr2L	20770428	20770628	201	-0.512598	0.0411803	0.248369	cad	chr2L	20770355	20770816	618.691	chr2L	20770259	20770894	636	-0.7741	4.94e-06	cad	chr2L	20770262	20770960	901.628
chr3L	19184120	19184320	201	-0.508974	0.041693	0.249297	fz2	chr3L	19184129	19184364	79.445	chr3L	19184023	19184649	627	-1.2001	1.26e-06	fz2	chr3L	19184013	19184453	102.023
chr2R	22318132	22318332	201	-0.508941	0.0415827	0.249297	Gp150	chr2R	22317988	22318353	211.088	chr2R	22317953	22318420	468	-1.0309	1.45e-07	Gp150	chr2R	22317283	22318829	116.833
chr2R	15756572	15756772	201	-0.499454	0.0448094	0.256507	CG30089	chr2R	15756627	15756788	184.511	chr2R	15756369	15756877	509	-2.3323	8.53e-26	CG30089	chr2R	15756563	15756790	169.224
chr2L	597849	598049	201	-0.501715	0.0447346	0.256507	NA	chr2L	597796	598077	71.444	chr2L	597860	598170	311	-0.5428	0.02086	NA	chr2L	597755	598143	84.449
chr2R	24882617	24882817	201	-0.502667	0.045197	0.257129	NKAIN	chr2R	24882596	24882872	102.028	chr2R	24882465	24882960	496	-0.5892	0.003507	NKAIN	chr2R	24882529	24882855	55.855
chr2L	4031224	4031424	201	-0.497735	0.0471112	0.260436	ed	chr2L	4031325	4032028	321.089	chr2L	4031202	4031532	331	-0.537	0.01209	ed	chr2L	4031178	4032134	318.788
chr2R	10596223	10596423	201	-0.485721	0.0484437	0.262191	psq	chr2R	10596297	10596721	94.45	chr2R	10596013	10596737	725	-2.3589	5.37e-33	psq	chr2R	10596069	10597326	101.369
chr2L	19161309	19161509	201	-0.49164	0.0494432	0.263116	brat	chr2L	19161354	19161672	90.559	chr2L	19161289	19161773	485	-0.5911	0.005817	brat	chr2L	19161301	19161626	73.924
chr2R	17679245	17679445	201	-0.483171	0.0528997	0.268034	Sema1b	chr2R	17679250	17679418	60.764	chr2R	17679117	17679507	391	-0.4938	0.0223	Sema1b	chr2R	17679233	17679434	48.013
chr2R	11182768	11182968	201	-0.469735	0.0539792	0.269925	shn	chr2R	11182757	11183070	66.562	chr2R	11182657	11183111	455	-2.782	1.39e-43	shn	chr2R	11182711	11183083	141.243
chr2L	4028866	4029066	201	-0.481261	0.0543672	0.270522	ed	chr2L	4028580	4029171	152.546	chr2L	4028785	4029010	226	-0.6667	0.01073	ed	chr2L	4028774	4029160	185.049
chr3L	16489453	16489653	201	-0.471352	0.05716	0.273954	CG33158	chr3L	16489551	16489777	182.447	chr3L	16489329	16489750	422	-1.5452	8.61e-17	CG33158	chr3L	16489306	16489774	112.724
chr2R	21057125	21057325	201	-0.457833	0.0621785	0.281216	shg	chr2R	21057122	21057282	48.307	chr2R	21057100	21057337	238	-0.7228	0.0003104	shg	chr2R	21056550	21057468	193.926
chr2R	11184697	11184897	201	-0.46334	0.062588	0.281773	shn	chr2R	11184635	11184875	1469.49	chr2R	11184773	11185043	271	-0.8006	0.008527	shn	chr2R	11184618	11184891	789.608
chr3R	20292145	20292345	201	-0.463624	0.064286	0.284237	cic	chr3R	20292090	20292356	41.887	chr3R	20291919	20292453	535	-0.8413	2.69e-05	cic	chr3R	20291949	20292438	217.546
chr2R	14981812	14982012	201	-0.450644	0.0693634	0.290551	pcs	chr2R	14981516	14982019	98.226	chr2R	14981796	14982682	887	-1.3059	1.2e-17	pcs	chr2R	14982272	14982715	65.328
chr3L	10857745	10857945	201	-0.453085	0.0704434	0.291659	tna	chr3L	10857370	10857855	163.401	chr3L	10857427	10857962	536	-0.8836	3.46e-06	tna	chr3L	10857361	10858054	123.21
chr3L	5630596	5630796	201	-0.448144	0.072004	0.293034	Blimp-1	chr3L	5630601	5630936	262.991	chr3L	5630527	5631103	577	-1.0129	0.0001634	Blimp-1	chr3L	5630631	5630896	51.884
chr2L	4280545	4280745	201	-0.437777	0.072308	0.293773	tutl	chr2L	4280553	4280692	47.282	chr2L	4280476	4280764	289	-1.8002	7.24e-15	tutl	chr2L	4280554	4280735	45.255
chr3L	682461	682661	201	-0.446703	0.0734872	0.295052	CG17129	chr3L	682516	682645	42.1	chr3L	682442	682748	307	-0.6556	0.02725	CG17129	chr3L	682503	682717	41.511
chr2L	13215751	13215951	201	-0.432393	0.0776633	0.301026	FBgn0004192	chr2L	13215803	13215990	87.184	chr2L	13215710	13215848	139	-1.0001	0.002481	FBgn0004192	chr2L	13215669	13216271	223.59
chr2R	10485338	10485538	201	-0.436099	0.081591	0.306213	pre-lola-G	chr2R	10485339	10485471	52.909	chr2R	10485152	10485769	618	-1.0494	1.81e-08	pre-lola-G	chr2R	10485083	10485761	344.968
chr2R	17801843	17802043	201	-0.431429	0.0842141	0.308735	grh	chr2R	17801629	17802005	355.828	chr2R	17801433	17802319	887	-0.9223	2.84e-07	grh	chr2R	17801458	17802286	429.096
chr2R	11198986	11199186	201	-0.420712	0.0927931	0.316234	shn	chr2R	11198900	11199247	86.905	chr2R	11198870	11199414	545	-1.2084	9.53e-15	shn	chr2R	11198149	11199444	208.312
chr2L	4371783	4371983	201	-0.407655	0.0945117	0.318262	Traf4	chr2L	4371710	4372068	187.046	chr2L	4371736	4372137	402	-0.6649	0.04324	Traf4	chr2L	4371792	4372121	99.229
chr3L	21067691	21067891	201	-0.415679	0.0967248	0.321229	siz	chr3L	21067588	21067928	101.873	chr3L	21067400	21068102	703	-1.5462	1.78e-17	siz	chr3L	21067394	21068019	206.687
chr3L	9004987	9005187	201	-0.414849	0.0973849	0.322087	Doc3	chr3L	9004770	9005154	149.216	chr3L	9004877	9005266	390	-1.7612	5.83e-16	Doc3	chr3L	9004734	9005267	185.907
chr2R	21250377	21250577	201	-0.413344	0.0985795	0.323455	ASPP	chr2R	21250448	21250588	41.615	chr2R	21250187	21250642	456	-0.6296	0.01056	ASPP	chr2R	21250486	21251182	146.76
chr3R	13812821	13813021	201	-0.407041	0.0988886	0.323494	tal-2A	chr3R	13812681	13813029	236.454	chr3R	13812555	13813192	638	-1.7717	2.31e-26	tal-2A	chr3R	13812550	13813206	271.493
chr3R	28861404	28861604	201	-0.412616	0.0989152	0.323494	spg	chr3R	28861355	28861593	286.679	chr3R	28861178	28861797	620	-1.505	4.58e-21	spg	chr3R	28861333	28861773	256.296
chr3R	26024566	26024766	201	-0.397231	0.108013	0.333989	E(spl)m4-BFM	chr3R	26024317	26025083	216.295	chr3R	26024143	26025015	873	-1.9781	1.68e-42	E(spl)m4-BFM	chr3R	26024305	26025176	293.434
chr2L	15013671	15013871	201	-0.396335	0.110563	0.33685	GABA-B-R1	chr2L	15013560	15013879	1115.27	chr2L	15013421	15013953	533	-0.973	1.11e-06	GABA-B-R1	chr2L	15013542	15013908	810.026
chr2L	12085795	12085995	201	-0.397308	0.111668	0.33685	prd	chr2L	12085762	12086070	143.665	chr2L	12085719	12086034	316	-0.672	0.01401	prd	chr2L	12085709	12086076	174.099
chr3R	24699378	24699578	201	-0.395698	0.11341	0.338072	slo	chr3R	24699363	24699666	1154.42	chr3R	24699334	24699623	290	-0.9555	0.000616	slo	chr3R	24699346	24699627	836.776
chrX	3845602	3845802	201	-0.394339	0.114721	0.338975	ec	chrX	3845523	3845978	179.199	chrX	3845457	3846017	561	-2.109	5.16e-18	ec	chrX	3845442	3845979	218.606
chr3L	13904691	13904891	201	-0.389577	0.115325	0.339544	dysc	chr3L	13904553	13904709	136.8	chr3L	13904616	13904911	296	-1.2428	1.42e-05	dysc	chr3L	13904562	13904690	42.073
chr2L	9421462	9421662	201	-0.38391	0.124308	0.348611	Mco1	chr2L	9421451	9421599	56.96	chr2L	9421268	9421841	574	-1.7119	1.06e-13	Mco1	chr2L	9421379	9421689	82.809
chrX	9495644	9495844	201	-0.382363	0.126105	0.34976	mgl	chrX	9495753	9496459	178.325	chrX	9495592	9495932	341	-0.6599	0.01915	mgl	chrX	9495667	9496318	84.6
chr3L	20401570	20401770	201	-0.382145	0.125832	0.34976	trbl	chr3L	20401581	20401809	111.363	chr3L	20401419	20401970	552	-0.444	0.03617	trbl	chr3L	20401237	20401890	106.162
chr2L	8809933	8810133	201	-0.375179	0.130627	0.354445	NA	chr2L	8809871	8810136	83.536	chr2L	8809666	8810260	595	-1.3378	6.18e-13	NA	chr2L	8809864	8810245	162.375
chr2L	2454610	2454810	201	-0.373788	0.132752	0.356053	dpp	chr2L	2454361	2454995	207.11	chr2L	2454385	2455146	762	-0.575	0.01635	dpp	chr2L	2454430	2455114	270.261
chr3L	10675002	10675202	201	-0.361555	0.147	0.37095	simj	chr3L	10674960	10675241	283.667	chr3L	10674964	10675209	246	-0.6753	0.0156	simj	chr3L	10674953	10675205	53.316
chr2R	21364554	21364754	201	-0.355218	0.149905	0.374123	cv-2	chr2R	21364566	21364811	234.426	chr2R	21364496	21364762	267	-0.8283	9.14e-05	cv-2	chr2R	21364461	21364803	271.902
chr3L	22402898	22403098	201	-0.349451	0.161783	0.385974	Ten-m	chr3L	22402809	22403373	77.368	chr3L	22402738	22403371	634	-1.6825	3.8e-21	Ten-m	chr3L	22402712	22404093	371.513
chr3L	16023305	16023505	201	-0.347861	0.161944	0.386074	Notum	chr3L	16023376	16023709	47.844	chr3L	16023119	16023611	493	-0.613	0.01968	Notum	chr3L	16023210	16023650	77.69
chr2L	14508882	14509082	201	-0.346362	0.165487	0.389185	NA	chr2L	14508909	14509185	183.984	chr2L	14508785	14509181	397	-0.9809	9.31e-05	NA	chr2L	14508679	14509216	45.255
chr3L	9041192	9041392	201	-0.344302	0.167533	0.390727	Doc1	chr3L	9040867	9041382	226.749	chr3L	9040913	9041650	738	-0.9338	5.23e-07	Doc1	chr3L	9040883	9041699	437.076
chr2L	1411857	1412057	201	-0.337276	0.172607	0.395128	robo2	chr2L	1411888	1412019	63.433	chr2L	1411759	1412078	320	-1.619	6.76e-19	robo2	chr2L	1410678	1412071	426.91
chr3R	29456594	29456794	201	-0.334403	0.174489	0.397518	Ptp99A	chr3R	29456614	29456784	48.466	chr3R	29456406	29456841	436	-0.9228	6.5e-05	Ptp99A	chr3R	29456434	29456833	99.361
chrX	8214119	8214319	201	-0.335494	0.17881	0.401399	sdt	chrX	8213980	8214322	181.561	chrX	8214113	8214421	309	-1.6127	1.36e-08	sdt	chrX	8213915	8214389	146.341
chr3R	23886632	23886832	201	-0.333107	0.179684	0.402193	Pli	chr3R	23886619	23887108	553.612	chr3R	23886507	23887149	643	-0.9403	4.81e-07	Pli	chr3R	23886152	23887078	503.526
chr3R	20949146	20949346	201	-0.321893	0.187249	0.409215	Atpalpha	chr3R	20948971	20949492	585.285	chr3R	20949213	20949349	137	-1.064	0.001868	Atpalpha	chr3R	20949209	20949510	347.506
chrX	18303916	18304116	201	-0.321809	0.19595	0.41664	NA	chrX	18303729	18303981	60.074	chrX	18303512	18304518	1007	-1.3498	2.9e-09	NA	chrX	18303507	18304528	121.794
chr3L	19904825	19905025	201	-0.313238	0.200716	0.421018	Su(Tpl)	chr3L	19904902	19905090	179.055	chr3L	19904816	19904950	135	-0.6505	0.03352	Su(Tpl)	chr3L	19904898	19905089	197.833
chr2R	22689695	22689895	201	-0.316157	0.205121	0.42546	Ppa	chr2R	22689710	22690074	85.246	chr2R	22689590	22690262	673	-1.8429	1.04e-18	Ppa	chr2R	22689535	22691229	543.406
chr2R	10536151	10536351	201	-0.313076	0.20658	0.426539	FBgn0263466	chr2R	10536156	10536363	83.307	chr2R	10536013	10536397	385	-0.6719	7.06e-05	FBgn0263466	chr2R	10534733	10536484	312.098
chr2R	7488625	7488825	201	-0.307025	0.216517	0.436151	wech	chr2R	7488711	7488888	98.641	chr2R	7488664	7488736	73	-0.629	0.0437	wech	chr2R	7488583	7489139	45.255
chr2R	18802507	18802707	201	-0.300131	0.220942	0.440358	MFS14	chr2R	18802568	18802930	97.729	chr2R	18802222	18803105	884	-0.8755	3.06e-05	MFS14	chr2R	18802329	18802980	144.263
chr2R	20961421	20961621	201	-0.303409	0.223102	0.442035	hbn	chr2R	20960868	20961735	478.546	chr2R	20960751	20961689	939	-0.8647	0.0009358	hbn	chr2R	20960790	20961725	374.855
chr2L	4283047	4283247	201	-0.302046	0.225563	0.444562	tutl	chr2L	4282838	4283448	98.308	chr2L	4282824	4283302	479	-1.228	1.07e-09	tutl	chr2L	4282138	4283371	78.332
chr3R	11351920	11352120	201	-0.287603	0.248512	0.462858	pros	chr3R	11351857	11352300	169.345	chr3R	11351590	11352363	774	-1.3804	9.98e-11	pros	chr3R	11351522	11353320	624.111
chr3L	20517448	20517648	201	-0.28309	0.253111	0.4672	CG5059	chr3L	20517323	20517735	621.496	chr3L	20517194	20517822	629	-0.8033	2.03e-05	CG5059	chr3L	20517036	20517758	347.488
chr3L	16410566	16410766	201	-0.279466	0.261761	0.475637	fax	chr3L	16410393	16410732	110.689	chr3L	16410248	16411099	852	-0.4953	0.005379	fax	chr3L	16410404	16411165	309.169
chrX	19322955	19323155	201	-0.279452	0.262177	0.475825	out	chrX	19322931	19323103	223.698	chrX	19322944	19323174	231	-1.1314	0.0002326	out	chrX	19322928	19323158	197.999
chrX	14629961	14630161	201	-0.277872	0.265018	0.478162	NetA	chrX	14630056	14630199	85.88	chrX	14629744	14630223	480	-0.984	0.0001124	NetA	chrX	14629811	14630236	98.789
chr2L	850042	850242	201	-0.273286	0.271813	0.484371	drongo	chr2L	849873	850351	145.886	chr2L	849802	850323	522	-1.4945	5.27e-20	drongo	chr2L	849854	850360	149.624
chr2R	18229797	18229997	201	-0.27267	0.27339	0.485181	fj	chr2R	18229785	18229981	124.115	chr2R	18229728	18230020	293	-1.3005	6.02e-09	fj	chr2R	18229841	18229977	113.1
chr3R	30852020	30852220	201	-0.269276	0.276639	0.488445	tll	chr3R	30852075	30852211	42.1	chr3R	30851746	30852426	681	-0.8082	7.26e-06	tll	chr3R	30851708	30852393	333.141
chrX	19754141	19754341	201	-0.253952	0.308119	0.516388	Pmp70	chrX	19754144	19754328	493.608	chrX	19753569	19754447	879	-1.6378	3.24e-09	Pmp70	chrX	19754045	19754382	452.824
chrX	18309446	18309646	201	-0.248835	0.317938	0.524867	upd1	chrX	18309199	18309841	206.448	chrX	18309052	18309944	893	-0.8274	0.002153	upd1	chrX	18309020	18309941	481.708
chrX	15646736	15646936	201	-0.244118	0.327148	0.531779	NA	chrX	15646673	15646818	112.906	chrX	15646661	15647544	884	-3.051	1.99e-31	NA	chrX	15646589	15647281	266.506
chr3R	9394502	9394702	201	-0.241809	0.329977	0.534451	FER	chr3R	9394513	9394756	63.732	chr3R	9394419	9394800	382	-0.6553	0.01801	FER	chr3R	9394392	9394720	148.673
chr2L	3606685	3606885	201	-0.240331	0.334457	0.53806	odd	chr2L	3606515	3606914	249.825	chr2L	3606425	3607144	720	-0.8491	3.05e-05	odd	chr2L	3606414	3607252	368.526
chrX	11495132	11495332	201	-0.235659	0.340607	0.542784	Drak	chrX	11495059	11495457	223.46	chrX	11494882	11495411	530	-1.5054	9.04e-10	Drak	chrX	11494946	11495368	118.97
chr2L	10841837	10842037	201	-0.223974	0.359153	0.556852	CG6700	chr2L	10841664	10841912	47.193	chr2L	10841870	10842395	526	-1.1595	1.49e-10	CG6700	chr2L	10841687	10842402	71.324
chr3R	26010704	26010904	201	-0.224607	0.362895	0.559557	E(spl)malpha-BFM	chr3R	26010492	26010882	66.639	chr3R	26010364	26011040	677	-1.7657	2.71e-22	E(spl)malpha-BFM	chr3R	26009850	26011112	216.883
chr2L	2175523	2175723	201	-0.220923	0.36637	0.56246	aop	chr2L	2175345	2175828	383.086	chr2L	2175466	2175679	214	-1.4828	5.83e-08	aop	chr2L	2175520	2175876	269.263
chr3R	6810716	6810916	201	-0.220122	0.375178	0.569248	FBgn0261503	chr3R	6810641	6810993	197.317	chr3R	6810611	6811009	399	-0.6935	0.0003497	FBgn0261503	chr3R	6810519	6811027	255.749
chr3R	21824719	21824919	201	-0.18869	0.444842	0.624352	CASK	chr3R	21824662	21825124	108.648	chr3R	21824754	21825204	451	-1.0744	1.37e-06	CASK	chr3R	21824649	21825205	46.877
chrX	3397914	3398114	201	-0.179302	0.466839	0.642853	CG12535	chrX	3398027	3398327	1537.97	chrX	3397741	3398310	570	-0.8147	0.0001161	CG12535	chrX	3397781	3398363	1060.06
chr2R	20960976	20961176	201	-0.140716	0.570357	0.722535	hbn	chr2R	20960868	20961735	478.546	chr2R	20960751	20961689	939	-0.8647	0.0009358	hbn	chr2R	20960790	20961725	374.855
chrX	18797613	18797813	201	-0.137571	0.579953	0.729235	bnb	chrX	18797552	18797720	46.016	chrX	18796883	18797909	1027	-1.6333	7.01e-14	bnb	chrX	18797434	18797895	41.157
chrX	409552	409752	201	-0.123476	0.619429	0.757864	l(1)sc	chrX	409441	409581	42.1	chrX	409330	409974	645	-2.3094	1.28e-18	l(1)sc	chrX	409265	409940	231.343
chr2L	15478251	15478451	201	-0.120972	0.621959	0.759314	sna	chr2L	15478343	15478565	94.078	chr2L	15478144	15478701	558	-1.0156	1.11e-09	sna	chr2L	15477945	15478675	261.617
chr2R	23113144	23113344	201	-0.107442	0.663485	0.786249	FBgn0266008	chr2R	23113206	23113373	274.696	chr2R	23113019	23113366	348	-0.7968	0.01504	FBgn0266008	chr2R	23113191	23113412	266.06
chrX	5517064	5517264	201	-0.101064	0.680643	0.798344	CG12730	chrX	5517035	5517275	1401.89	chrX	5517048	5517837	790	-1.6966	6.61e-11	CG12730	chrX	5517012	5517302	805.602
chrX	6669089	6669289	201	-0.0998472	0.687434	0.802893	CG3198	chrX	6669037	6669564	524.692	chrX	6669204	6669396	193	-0.9374	0.009417	CG3198	chrX	6669100	6669566	339.702
chr3R	4802149	4802349	201	0.0984469	0.692077	0.80648	ctrip	chr3R	4802051	4802335	2336.49	chr3R	4802252	4802674	423	-0.9988	2.79e-05	ctrip	chr3R	4802020	4802378	1592.62
chr3R	24555229	24555429	201	-0.0892233	0.714825	0.821665	FBgn0004188	chr3R	24555292	24555469	339.6	chr3R	24555189	24555452	264	-0.8291	0.002578	FBgn0004188	chr3R	24555240	24555519	304.834
chr3R	26024122	26024322	201	0.0703754	0.776791	0.865204	E(spl)m4-BFM	chr3R	26024317	26025083	216.295	chr3R	26024143	26025015	873	-1.9781	1.68e-42	E(spl)m4-BFM	chr3R	26024305	26025176	293.434
chr3L	14634707	14634907	201	-0.0513997	0.833231	0.901233	RecQ5	chr3L	14634718	14634963	98.308	chr3L	14634704	14635024	321	-2.1922	3.22e-15	RecQ5	chr3L	14634663	14635227	246.041
chrX	8829461	8829661	201	0.0172843	0.944542	0.967913	NA	chrX	8829576	8829738	300.374	chrX	8829401	8829810	410	-0.7249	0.03705	NA	chrX	8829574	8829734	169.633
chr2R	13716334	13716534	201	0.00135818	0.99563	0.997725	CG17716	chr2R	13716459	13716606	64.641	chr2R	13716194	13716465	272	-0.9298	0.008832	CG17716	chr2R	13716426	13716605	83.46
chrX	15127976	15128176	201	0.126748	0.550597	1	drd	chrX	15128051	15128180	41.426	chrX	15127931	15128088	158	-0.933	0.03376	drd	chrX	15128049	15128185	51.552
chrX	4190337	4190537	201	-0.344144	0.167307	1	Fas2	chrX	4190210	4190368	138.543	chrX	4190090	4190633	544	-0.8554	0.01544	Fas2	chrX	4190521	4190811	45.255

## Sheet: Type IV n= 374
ATAC-seq (MTD vs. clamp-i non-DA)								ChIP-seq (CLAMP)				ATAC-seq (wt vs. zld- non-DA)							ChIP-seq (ZLD)
Chromosome	ChromStart	ChromEnd	ATACpeakSize	FC	p.value	FDR	GeneName	Chromosome	ChromStart	ChromEnd	PeakScore	Chromosome	ChromStart	ChromEnd	ATACpeakSize	FC	FDR	GeneName	Chromosome	ChromStart	ChromEnd	PeakScore
chr3R	29458055	29458255	201	-0.496331	0.0460117	0.258483	Ptp99A	chr3R	29458079	29458345	99.703	chr3R	29458011	29458334	324	-0.0891	0.876	Ptp99A	chr3R	29458165	29458346	38.358
chr3L	3070722	3070922	201	-0.496318	0.0464061	0.259325	PAN3	chr3L	3070560	3071087	130.393	chr3L	3070518	3070967	450	0.4122	0.07615	PAN3	chr3L	3070576	3071072	145.533
chr3R	6997023	6997223	201	-0.496883	0.0476201	0.261064	Antp	chr3R	6997042	6997259	87.018	chr3R	6996977	6997246	270	0.4928	0.05186	Antp	chr3R	6997041	6997321	49.094
chrX	8410452	8410652	201	-0.495891	0.047912	0.261437	Trf2	chrX	8410318	8410771	475.95	chrX	8410401	8410681	281	0.3453	0.3512	Trf2	chrX	8409850	8410691	120.405
chr2L	6939809	6940009	201	-0.490981	0.0488486	0.262467	CG18304	chr2L	6939717	6940108	267.681	chr2L	6939682	6940082	401	-0.0421	1	CG18304	chr2L	6939857	6940082	57.042
chr3L	4626083	4626283	201	-0.492415	0.0491793	0.262905	HDAC1	chr3L	4625681	4626340	430.866	chr3L	4626026	4626311	286	0.2099	0.4169	HDAC1	chr3L	4625690	4626355	146.457
chrX	17738649	17738849	201	-0.488016	0.0513284	0.265641	raskol	chrX	17738718	17739337	326.081	chrX	17738655	17738835	181	0.4598	0.1582	raskol	chrX	17738211	17739299	96.111
chr3L	8315352	8315552	201	-0.480351	0.0514212	0.265641	Cpsf6	chr3L	8315107	8315421	108.406	chr3L	8314914	8315609	696	-0.1311	0.5433	Cpsf6	chr3L	8315253	8315736	57.042
chr3R	22781514	22781714	201	-0.485319	0.0522746	0.267383	CG7029	chr3R	22781594	22781726	39.907	chr3R	22781388	22781872	485	-0.1126	0.7209	CG7029	chr3R	22781595	22781724	48.881
chr3R	9229570	9229770	201	-0.485589	0.0526973	0.267809	pum	chr3R	9229596	9229777	54.332	chr3R	9229356	9229845	490	0.3689	0.2137	pum	chr3R	9229390	9229767	65.328
chr3R	16948628	16948828	201	-0.482473	0.0539696	0.269925	Abd-B	chr3R	16948539	16949085	455.002	chr3R	16948575	16948858	284	0.4649	0.09104	Abd-B	chr3R	16948578	16948918	384.72
chr3R	4852501	4852701	201	-0.481034	0.0541489	0.269993	opa	chr3R	4852302	4852811	440.663	chr3R	4852335	4852978	644	0.0478	1	opa	chr3R	4852251	4852951	337.836
chr3R	15794412	15794612	201	-0.478572	0.0559333	0.271931	c(3)G	chr3R	15794267	15794587	73.619	chr3R	15794009	15794671	663	0.1387	0.7649	c(3)G	chr3R	15793271	15794110	66.153
chr3R	17080130	17080330	201	-0.471108	0.0556785	0.271931	Keap1	chr3R	17080140	17080304	39.907	chr3R	17080117	17080357	241	-0.4016	0.1882	Keap1	chr3R	17080031	17080295	53.024
chr2R	7989081	7989281	201	-0.478231	0.0560635	0.271949	ACC	chr2R	7989050	7989299	124.931	chr2R	7989054	7989339	286	0.3759	0.2355	ACC	chr2R	7989076	7989298	37.869
chr3R	16702940	16703140	201	-0.471434	0.0600617	0.278322	Ubx	chr3R	16702800	16703303	487.11	chr3R	16702666	16703248	583	0.0705	1	Ubx	chr3R	16702792	16703264	403.861
chr3L	14274145	14274345	201	-0.467177	0.0611368	0.280345	fz	chr3L	14274008	14274210	56.458	chr3L	14274054	14274438	385	-0.1337	0.7192	fz	chr3L	14274056	14274470	76.468
chr3L	14409439	14409639	201	-0.467811	0.0615676	0.280524	stwl	chr3L	14409450	14409696	95.944	chr3L	14409415	14409735	321	0.3837	0.1297	stwl	chr3L	14409466	14409973	61.145
chr2L	9158425	9158625	201	-0.458506	0.0624022	0.281216	CG32982	chr2L	9158420	9158710	237.648	chr2L	9158439	9158668	230	-0.4564	0.1775	CG32982	chr2L	9158358	9158594	41.511
chr2R	9979178	9979378	201	-0.451644	0.0643034	0.284237	eve	chr2R	9978832	9979460	265.028	chr2R	9979091	9979486	396	-0.2151	0.5686	eve	chr2R	9979003	9979567	279.963
chr3R	13901658	13901858	201	-0.459837	0.0654103	0.285365	ems	chr3R	13901503	13901850	415.718	chr3R	13901419	13901973	555	0.3021	0.4098	ems	chr3R	13901449	13901989	475.712
chr3L	10674205	10674405	201	-0.455569	0.0653059	0.285365	simj	chr3L	10674155	10674482	95.838	chr3L	10674053	10674462	410	-0.0993	0.7431	simj	chr3L	10674169	10674500	55.962
chr3R	16899133	16899333	201	-0.450449	0.0656577	0.285553	FBgn0264857	chr3R	16899277	16900051	175.618	chr3R	16899094	16899313	220	0.3364	0.2764	FBgn0264857	chr3R	16899195	16900153	394.413
chr3L	543313	543513	201	-0.459297	0.0664779	0.286687	klar	chr3L	543029	543613	162.594	chr3L	543325	543533	209	0.4334	0.1289	klar	chr3L	542817	543490	98.504
chr2L	12055900	12056100	201	-0.457233	0.0679985	0.2889	JhI-21	chr2L	12055991	12056245	111.796	chr2L	12055857	12056085	229	0.0859	0.8109	JhI-21	chr2L	12055867	12056196	41.113
chrX	590548	590748	201	-0.454529	0.0680226	0.2889	CG13366	chrX	590484	590952	350.786	chrX	590409	591094	686	0.276	0.5058	CG13366	chrX	590417	591016	307.156
chr2L	7306871	7307071	201	-0.455725	0.0688138	0.290106	wg	chr2L	7306773	7307354	942.796	chr2L	7306786	7307308	523	0.0341	1	wg	chr2L	7306762	7307342	480.363
chrX	8061015	8061215	201	-0.451586	0.0688853	0.290106	fs(1)h	chrX	8060865	8061257	318.59	chrX	8060910	8061240	331	0.3382	0.3048	fs(1)h	chrX	8060879	8061848	158.654
chr3R	9809268	9809468	201	-0.445077	0.0688315	0.290106	FBXO11	chr3R	9808768	9809426	299.958	chr3R	9809268	9809498	231	0.1448	0.6643	FBXO11	chr3R	9808974	9809536	64.01
chr2R	10559722	10559922	201	-0.45315	0.0692098	0.290506	psq	chr2R	10559541	10559859	136.316	chr2R	10559434	10559975	542	0.1817	0.682	psq	chr2R	10559610	10559904	45.255
chr3R	9874497	9874697	201	-0.451049	0.0696151	0.290878	Glut4EF	chr3R	9874536	9874960	78.925	chr3R	9874428	9874764	337	-0.1559	0.6663	Glut4EF	chr3R	9874362	9874882	109.851
chrX	19773874	19774074	201	-0.452553	0.0698503	0.291217	zld	chrX	19773690	19774297	139.919	chrX	19773321	19774551	1231	-0.439	0.1394	zld	chrX	19773713	19774574	229.018
chr2L	18947555	18947755	201	-0.451228	0.0717152	0.292719	CG10428	chr2L	18947501	18947877	178.506	chr2L	18947363	18947788	426	0.1642	0.6554	CG10428	chr2L	18947401	18947984	46.877
chr3L	10856643	10856843	201	-0.450982	0.0717917	0.292776	tna	chr3L	10856470	10857098	1136.21	chr3L	10856554	10857024	471	-0.2812	0.4502	tna	chr3L	10856514	10857024	339.121
chr2R	11197274	11197474	201	-0.449239	0.0719699	0.293034	shn	chr2R	11197302	11197572	143.129	chr2R	11197233	11197569	337	-0.161	0.8073	shn	chr2R	11196975	11197674	87.236
chr3L	7560637	7560837	201	0.445064	0.0744896	0.296662	CG14837	chr3L	7560601	7560849	2083.84	chr3L	7560759	7560823	65	0.1484	1	CG14837	chr3L	7560563	7560873	1412.28
chr2L	13550069	13550269	201	-0.44328	0.074619	0.296761	B4	chr2L	13550176	13550415	99.379	chr2L	13550016	13550294	279	0.3202	0.2792	B4	chr2L	13550120	13550503	87.353
chr2L	19158166	19158366	201	-0.445563	0.0749735	0.297261	brat	chr2L	19158287	19158527	100.997	chr2L	19158078	19158699	622	-0.0916	0.981	brat	chr2L	19158027	19159047	183.734
chrX	6868844	6869044	201	-0.443543	0.0754779	0.29802	CG14434	chrX	6868938	6869079	108.534	chrX	6868919	6869033	115	-0.0076	0.9807	CG14434	chrX	6868847	6869078	170.076
chr2R	19293176	19293376	201	-0.441511	0.0773956	0.30081	mip40	chr2R	19293018	19293475	467.94	chr2R	19293134	19293474	341	0.4582	0.07373	mip40	chr2R	19293197	19293447	101.606
chr3R	4477587	4477787	201	-0.435096	0.0775274	0.30089	CG31523	chr3R	4477615	4477796	540.039	chr3R	4477606	4477881	276	-0.4072	0.2178	CG14651	chr3R	4477595	4477796	353.259
chr2R	12996285	12996485	201	-0.437056	0.0780099	0.301584	Su(z)2	chr2R	12996235	12996838	264.5	chr2R	12996175	12996719	545	0.2932	0.1649	Su(z)2	chr2R	12996145	12996704	163.769
chr3R	9230056	9230256	201	-0.430288	0.080053	0.303881	pum	chr3R	9230175	9230324	175.079	chr3R	9230092	9230247	156	-0.1474	0.7462	pum	chr3R	9230184	9230318	45.841
chr2R	14044232	14044432	201	-0.428966	0.0800236	0.303881	mam	chr2R	14044101	14044458	797	chr2R	14044210	14044457	248	-0.0984	0.6231	mam	chr2R	14044240	14044485	292.021
chr3R	28547229	28547429	201	-0.433787	0.0821938	0.307038	mIF2	chr3R	28547362	28547588	383.534	chr3R	28547108	28547605	498	0.1103	0.7163	mIF2	chr3R	28547188	28547597	264.429
chr3L	2466638	2466838	201	-0.428715	0.0825823	0.307284	Svil	chr3L	2466736	2466998	50.647	chr3L	2466525	2466989	465	-0.2608	0.3571	Svil	chr3L	2466647	2466982	63.202
chr3R	29691192	29691392	201	-0.433813	0.0831967	0.307991	Obp99c	chr3R	29691045	29691367	80.913	chr3R	29690979	29691433	455	0.2923	0.2817	Obp99c	chr3R	29690982	29691398	73.924
chr2R	21481092	21481292	201	-0.431251	0.0834845	0.308091	Sdc	chr2R	21480703	21481309	144.766	chr2R	21481074	21481284	211	-0.4705	0.05934	Sdc	chr2R	21480815	21481164	113.21
chr3L	2867681	2867881	201	-0.430933	0.0844815	0.308892	Tet	chr3L	2867402	2867968	456.589	chr3L	2867517	2868071	555	0.1128	0.8464	Tet	chr3L	2867609	2867992	151.879
chr2L	594758	594958	201	-0.423228	0.0849928	0.309306	Gsc	chr2L	594749	595129	307.579	chr2L	594597	594994	398	0.2091	0.5931	Gsc	chr2L	594716	595102	173.207
chrX	2124303	2124503	201	-0.426519	0.0864981	0.310119	ph-d	chrX	2124227	2124691	114.006	chrX	2124299	2124508	210	0.0718	0.9322	ph-d	chrX	2124284	2124538	73.924
chr3R	16764098	16764298	201	-0.426006	0.086138	0.310119	FBgn0020556	chr3R	16763950	16764460	630.189	chr3R	16763973	16764512	540	0.2588	0.2779	FBgn0020556	chr3R	16763781	16764520	558.132
chr2R	14534362	14534562	201	-0.425669	0.086438	0.310119	ttv	chr2R	14534377	14534579	794.1	chr2R	14534322	14534561	240	-0.079	0.8708	ttv	chr2R	14534368	14534580	393.644
chr2L	9521104	9521304	201	-0.420925	0.0872291	0.31097	Oatp30B	chr2L	9521261	9521848	112.756	chr2L	9521154	9521303	150	-0.1348	0.7781	Oatp30B	chr2L	9520867	9521729	49.094
chr3R	21060601	21060801	201	-0.425856	0.0885337	0.312553	Mvl	chr3R	21060696	21060998	120.984	chr3R	21060547	21061036	490	0.1374	0.5627	Mvl	chr3R	21060656	21060919	46.022
chrX	6861567	6861767	201	-0.424477	0.0894118	0.31278	CG14434	chrX	6861436	6861902	219.206	chrX	6861546	6861946	401	-0.0029	1	CG14434	chrX	6861375	6861927	140.328
chr3L	542859	543059	201	-0.41485	0.0899445	0.31278	klar	chr3L	543029	543613	162.594	chr3L	542855	543190	336	0.0228	1	klar	chr3L	542817	543490	98.504
chr3L	14001999	14002199	201	-0.410769	0.0908721	0.313679	CG17359	chr3L	14001954	14002515	105.121	chr3L	14002047	14002184	138	0.4115	0.1809	CG17359	chr3L	14001922	14002316	49.283
chrX	9496169	9496369	201	-0.422191	0.0914211	0.314073	mgl	chrX	9495753	9496459	178.325	chrX	9496150	9496565	416	-0.1595	0.9068	mgl	chrX	9495667	9496318	84.6
chrX	7111029	7111229	201	-0.419617	0.0936364	0.317211	fz4	chrX	7110873	7111273	350.647	chrX	7110888	7111263	376	0.123	1	fz4	chrX	7110910	7111277	221.11
chr2R	14715831	14716031	201	-0.418691	0.0942219	0.317988	mspo	chr2R	14715889	14716061	409.161	chr2R	14715846	14716097	252	0.1827	0.7557	mspo	chr2R	14715877	14716066	204.136
chrX	19683168	19683368	201	-0.416975	0.0954815	0.319484	Ubqn	chrX	19682904	19683432	368.137	chrX	19682996	19683877	882	0.4668	0.0821	Ubqn	chrX	19682995	19683791	73.924
chr3R	7037342	7037542	201	-0.416916	0.0955025	0.319484	FBgn0266238	chr3R	7037256	7037869	332.689	chr3R	7037251	7037969	719	0.432	0.1049	FBgn0266238	chr3R	7037235	7037943	281.903
chrX	5052878	5053078	201	-0.416708	0.0954657	0.319484	ovo	chrX	5052918	5053442	329.498	chrX	5052642	5053493	852	-0.4004	0.2343	ovo	chrX	5052655	5053463	287.094
chr2R	11603452	11603652	201	-0.416387	0.0955954	0.319651	tou	chr2R	11603261	11603708	464.754	chr2R	11603374	11603745	372	0.2588	0.5806	tou	chr2R	11603399	11603705	57.042
chr3R	6893436	6893636	201	-0.40928	0.0958505	0.319961	FBgn0267119	chr3R	6893173	6893542	131.77	chr3R	6893098	6893825	728	-0.2958	0.1548	FBgn0267119	chr3R	6893042	6893795	260.812
chrX	5046924	5047124	201	-0.414173	0.0978557	0.32269	ovo	chrX	5047033	5047403	93.459	chrX	5046795	5047457	663	0.1136	0.729	ovo	chrX	5046855	5047405	101.369
chrX	3136483	3136683	201	-0.413299	0.0982031	0.322985	N	chrX	3136397	3136687	241.679	chrX	3136405	3136859	455	0.0015	1	N	chrX	3136347	3136757	220.76
chr2L	3771603	3771803	201	-0.409415	0.100146	0.325368	bowl	chr2L	3771634	3771969	94.39	chr2L	3771578	3772209	632	-0.0618	0.8352	bowl	chr2L	3771041	3772054	130.961
chrX	6988826	6989026	201	-0.40508	0.102218	0.327285	ogre	chrX	6988876	6989183	89.119	chrX	6988663	6989224	562	-0.1847	0.6867	ogre	chrX	6988630	6989182	211.136
chrX	15374178	15374550	373	-0.405552	0.104729	0.330309	acj6	chrX	15374298	15374554	142.049	chrX	15374189	15374544	356	0.1152	0.7539	acj6	chrX	15374293	15374424	55.476
chr3L	20621680	20621880	201	-0.395414	0.105066	0.330575	knrl	chr3L	20621671	20622212	174.461	chr3L	20621561	20622211	651	0.3652	0.06452	knrl	chr3L	20621545	20622133	191.349
chrX	19298585	19298785	201	-0.396986	0.105107	0.330637	CG8034	chrX	19298435	19298671	1824.58	chrX	19298413	19298917	505	0.2167	0.5086	CG8034	chrX	19298390	19298863	1210.94
chrX	10815722	10815922	201	-0.402228	0.105285	0.330847	Imp	chrX	10815642	10815863	99.522	chrX	10815562	10815975	414	0.2455	0.5142	Imp	chrX	10815482	10816026	157.023
chr2R	15329264	15329464	201	-0.402833	0.105532	0.331084	CG8157	chr2R	15329201	15329536	239.858	chr2R	15329185	15329487	303	0.4621	0.09508	CG8157	chr2R	15329274	15329553	53.658
chrX	4684460	4684660	201	-0.404559	0.105837	0.331361	Pp2C1	chrX	4684353	4684860	397.392	chrX	4684288	4684792	505	0.396	0.2234	Pp2C1	chrX	4684203	4684917	120.88
chr2R	11475537	11475737	201	-0.398487	0.108103	0.334062	inv	chr2R	11475141	11475816	688.266	chr2R	11475490	11475842	353	0.3062	0.2636	inv	chr2R	11475234	11475832	194.414
chr3R	9881508	9881708	201	-0.401045	0.108893	0.334835	Glut4EF	chr3R	9881371	9881771	90.124	chr3R	9881400	9881776	377	-0.2946	0.2342	FBgn0266389	chr3R	9881449	9881909	120.88
chrX	2428977	2429177	201	-0.400596	0.109121	0.335034	gt	chrX	2428903	2429196	82.826	chrX	2428625	2429261	637	-0.4835	0.1094	gt	chrX	2428729	2429290	303.378
chr3R	23279124	23279324	201	-0.393793	0.112149	0.33685	orb	chr3R	23279062	23279453	83.289	chr3R	23278833	23279495	663	0.2162	0.5502	orb	chr3R	23278911	23279473	256.796
chr2R	23621476	23621676	201	-0.396744	0.11266	0.337255	NA	chr2R	23621432	23621688	109.32	chr2R	23621415	23621829	415	0.174	0.5894	NA	chr2R	23621432	23621710	91.962
chr3R	17624540	17624740	201	-0.39378	0.112847	0.337434	FBgn0011993	chr3R	17624575	17624835	87.337	chr3R	17624514	17624893	380	0.1704	0.5984	FBgn0011993	chr3R	17624576	17624902	74.81
chr2L	701825	702025	201	-0.393424	0.112847	0.337434	ds	chr2L	701796	702141	102.264	chr2L	701740	702368	629	0.2125	0.5248	ds	chr2L	701848	702113	45.255
chr3R	29088120	29088320	201	-0.394668	0.112933	0.337493	CG11873	chr3R	29087994	29088383	66.299	chr3R	29087863	29088683	821	-0.011	1	CG11873	chr3R	29087854	29088401	85.752
chr3R	14278726	14278926	201	-0.394536	0.114523	0.338921	trx	chr3R	14278632	14279204	358.974	chr3R	14278571	14279350	780	0.3508	0.1666	trx	chr3R	14278610	14279157	53.105
chr2R	16580640	16580840	201	-0.394012	0.114695	0.338975	Cdk4	chr2R	16580618	16580932	144.404	chr2R	16580438	16580857	420	0.0951	0.8946	Cdk4	chr2R	16580573	16580932	78.332
chrX	6279269	6279469	201	-0.393071	0.115528	0.339544	CG3566	chrX	6278905	6279491	1015	chrX	6279048	6279956	909	0.2427	0.631	CG3566	chrX	6278877	6279795	766.932
chr2R	12914594	12914794	201	-0.389032	0.116118	0.339749	NAT1	chr2R	12914655	12914807	401.77	chr2R	12914570	12914941	372	0.2404	0.4709	NAT1	chr2R	12914604	12914850	325.79
chr2L	3538994	3539194	201	-0.387303	0.119416	0.34336	drm	chr2L	3538590	3539240	181.886	chr2L	3538991	3539178	188	-0.3399	0.3043	drm	chr2L	3538527	3539795	143.711
chr2L	17754193	17754393	201	-0.381913	0.119463	0.34336	CadN	chr2L	17754080	17754414	69.099	chr2L	17754192	17754449	258	0.0084	0.8893	CadN	chr2L	17754151	17754399	73.924
chrX	4616718	4616918	201	-0.385778	0.122261	0.346228	peb	chrX	4616718	4616862	158.04	chrX	4616697	4616921	225	0.2387	0.5549	peb	chrX	4616660	4616893	137.605
chr3R	8181495	8181695	201	-0.38499	0.123224	0.347181	grn	chr3R	8181413	8182130	793.736	chr3R	8181317	8182066	750	0.0401	0.9093	grn	chr3R	8181388	8182031	567.835
chr3L	11562115	11562315	201	-0.37321	0.124971	0.349262	CG7394	chr3L	11561998	11562189	171.414	chr3L	11561954	11562490	537	0.1241	0.7566	CG7394	chr3L	11561998	11562177	106.204
chrX	6803541	6803741	201	-0.379604	0.127691	0.351543	pod1	chrX	6803281	6803834	137.334	chrX	6803526	6803757	232	0.2255	0.4634	pod1	chrX	6803528	6803768	78.332
chr2R	12985619	12985819	201	-0.379745	0.12776	0.35167	FBgn0265427	chr2R	12985810	12985989	72.472	chr2R	12985568	12986044	477	0.1555	0.7375	FBgn0265427	chr2R	12984688	12986186	410.722
chr2R	21502013	21502213	201	-0.378215	0.128705	0.352571	TAF1C-like	chr2R	21502092	21502365	38.555	chr2R	21501999	21502300	302	0.1211	0.6608	TAF1C-like	chr2R	21501873	21502259	69.589
chr2R	11604460	11604660	201	-0.369168	0.130002	0.353751	tou	chr2R	11604510	11604703	140.375	chr2R	11604476	11604651	176	0.3603	0.2266	tou	chr2R	11604491	11604713	88.628
chr2L	5009390	5009590	201	-0.37558	0.130288	0.354086	SelT	chr2L	5009481	5009814	73.403	chr2L	5009371	5009536	166	0.002	0.9081	SelT	chr2L	5009514	5009923	49.094
chr3R	7474700	7474900	201	-0.374682	0.133875	0.356711	FBgn0012000	chr3R	7474642	7474937	184.009	chr3R	7474537	7475144	608	0.3598	0.191	FBgn0012000	chr3R	7474625	7475138	106.875
chr3R	22397131	22397331	201	-0.365505	0.134634	0.35742	FBgn0051162	chr3R	22397172	22397355	144.967	chr3R	22397116	22397358	243	0.2224	0.525	FBgn0051162	chr3R	22397108	22397514	128.744
chrX	17160566	17160766	201	-0.371696	0.1351	0.357847	baz	chrX	17160580	17160861	134.914	chrX	17160476	17160891	416	0.182	0.7778	baz	chrX	17160584	17160842	53.024
chr2R	20106445	20106645	201	-0.370879	0.136152	0.358863	NA	chr2R	20106371	20106742	444.99	chr2R	20106297	20106871	575	-0.2318	0.604	NA	chr2R	20106352	20106874	346.875
chr3L	18618305	18618505	201	-0.366757	0.136784	0.359559	not	chr3L	18618140	18618477	213.433	chr3L	18618116	18618529	414	0.1822	0.7043	not	chr3L	18618173	18618414	46.022
chr2L	9929155	9929355	201	-0.365069	0.139324	0.36228	CG42366	chr2L	9929191	9929431	414.683	chr2L	9929192	9929410	219	0.126	0.695	CG42366	chr2L	9929242	9929406	137.692
chr2L	11447751	11447951	201	-0.365227	0.140821	0.364283	salm	chr2L	11447447	11448097	1056.09	chr2L	11447476	11448107	632	0.0377	1	salm	chr2L	11447452	11448033	341.569
chrX	2136823	2137023	201	-0.366816	0.141433	0.36492	ph-p	chrX	2136800	2137302	245.163	chrX	2136740	2137267	528	0.0038	1	ph-p	chrX	2136701	2137818	184.208
chr3R	13074654	13074854	201	-0.365921	0.14213	0.365851	sim	chr3R	13074586	13074936	286.474	chr3R	13074604	13074874	271	0.0571	0.8294	sim	chr3R	13074625	13074910	82.037
chr2R	25061730	25061930	201	-0.356251	0.142336	0.366072	gsb	chr2R	25061725	25061967	161.269	chr2R	25061618	25062066	449	0.0342	1	gsb	chr2R	25061629	25062040	167.619
chrX	13128800	13129000	201	-0.366159	0.142725	0.366702	CG15717	chrX	13128886	13129080	42.1	chrX	13128520	13129106	587	0.4587	0.0665	CG15717	chrX	13128856	13129116	94.194
chr3R	17617678	17617878	201	-0.360258	0.145224	0.369018	FBgn0011944	chr3R	17617760	17617892	143.057	chr3R	17617684	17617904	221	-0.2259	0.5346	FBgn0011944	chr3R	17617722	17617940	104.331
chr2L	4811731	4811931	201	-0.357909	0.145945	0.369801	CG15629	chr2L	4811686	4811972	184.544	chr2L	4811380	4812069	690	0.3012	0.2811	CG15629	chr2L	4811443	4812017	237.734
chrX	2123256	2123456	201	-0.36115	0.146728	0.370738	ph-d	chrX	2123188	2124052	437.487	chrX	2123174	2124073	900	0.1292	1	ph-d	chrX	2122597	2124030	289.809
chrX	17739070	17739270	201	-0.360453	0.148067	0.372111	raskol	chrX	17738718	17739337	326.081	chrX	17738913	17739336	424	-0.3621	0.3478	raskol	chrX	17738211	17739299	96.111
chr3R	4803341	4803541	201	-0.358013	0.150694	0.375098	ctrip	chr3R	4803405	4803544	56.105	chr3R	4803157	4803726	570	0.0102	1	ctrip	chr3R	4803123	4803650	221.879
chr3L	14177551	14177751	201	-0.358521	0.150866	0.375228	D	chr3L	14177423	14178294	546.797	chr3L	14177384	14177882	499	-0.1248	0.897	D	chr3L	14177355	14178271	273.836
chr3L	19929160	19929360	201	-0.351114	0.153389	0.377437	CG8004	chr3L	19929019	19929419	316.801	chr3L	19929064	19929189	126	0.2095	0.6855	CG8004	chr3L	19929090	19929415	86.112
chr3L	6979998	6980198	201	-0.355092	0.15433	0.37834	Galphai	chr3L	6980056	6980209	48.463	chr3L	6979931	6980208	278	0.3349	0.1832	Galphai	chr3L	6979877	6980300	88.986
chr2L	14490685	14490885	201	-0.355053	0.154886	0.378971	noc	chr2L	14490466	14490860	166.108	chr2L	14490481	14491259	779	-0.0883	0.7264	noc	chr2L	14490219	14491070	285.545
chr3L	15031847	15032047	201	-0.35184	0.155796	0.380348	Sytbeta	chr3L	15031802	15032126	42.1	chr3L	15031846	15032069	224	0.1555	0.6554	Sytbeta	chr3L	15031774	15032045	45.255
chr2R	12958820	12959020	201	-0.349383	0.157308	0.38182	NA	chr2R	12958574	12959142	82.052	chr2R	12958461	12959223	763	-0.2186	0.6516	NA	chr2R	12958472	12959676	252.362
chrX	2136240	2136440	201	-0.352818	0.157784	0.382318	ph-p	chrX	2136330	2136508	133.452	chrX	2136222	2136431	210	0.2061	0.5382	ph-p	chrX	2136309	2136508	97.378
chr3L	21479692	21479892	201	-0.352322	0.158221	0.382787	NA	chr3L	21479605	21480049	250.138	chr3L	21479632	21479952	321	0.2119	0.5013	NA	chr3L	21479658	21480743	248.832
chr2L	8825443	8825643	201	-0.340562	0.158238	0.382787	SoxN	chr2L	8825148	8825838	243.143	chr2L	8825180	8826009	830	-0.0632	1	SoxN	chr2L	8825187	8825936	284.589
chr2L	6971793	6971993	201	-0.346963	0.159805	0.38421	snRNP-U1-70K	chr2L	6971801	6972079	118.797	chr2L	6971565	6971983	419	-0.2462	0.3184	snRNP-U1-70K	chr2L	6971528	6972054	111.012
chr2R	21428728	21428928	201	0.344581	0.160044	0.38428	Sdc	chr2R	21428747	21428920	439.053	chr2R	21428826	21428964	139	-0.4285	0.7126	Sdc	chr2R	21428714	21428958	231.86
chr2R	8668805	8669005	201	-0.349768	0.161091	0.385249	Acsl	chr2R	8668825	8668997	482.557	chr2R	8668751	8669107	357	0.3348	0.1832	Acsl	chr2R	8668798	8668990	220.293
chr3L	5634276	5634476	201	-0.349378	0.161679	0.385974	Blimp-1	chr3L	5634255	5634561	173.758	chr3L	5634087	5634603	517	-0.1183	1	Blimp-1	chr3L	5634170	5634571	95.897
chr3R	6791567	6791767	201	-0.347673	0.161645	0.385974	Dfd	chr3R	6791431	6791843	260.806	chr3R	6791493	6791926	434	0.4008	0.1173	Dfd	chr3R	6791431	6791910	636.792
chr3R	15420619	15420819	201	-0.345359	0.165836	0.389327	FBgn0262397	chr3R	15420733	15420887	247.956	chr3R	15420333	15420906	574	0.4518	0.1579	FBgn0262367	chr3R	15420459	15420891	99.785
chr3L	11252128	11252328	201	-0.344938	0.167234	0.390727	scyl	chr3L	11252002	11252503	116.441	chr3L	11251697	11252611	915	-0.0815	1	scyl	chr3L	11251755	11252394	113.456
chrX	12744081	12744281	201	-0.343614	0.168693	0.39228	CG4004	chrX	12744226	12744396	78.513	chrX	12744101	12744221	121	0.2579	0.4775	CG4004	chrX	12743922	12744670	196.439
chr2R	17822470	17822670	201	-0.340706	0.169239	0.392659	grh	chr2R	17822252	17822662	151.414	chr2R	17822074	17822867	794	0.2867	0.279	grh	chr2R	17822069	17822880	378.267
chr2R	10583278	10583478	201	-0.339861	0.169616	0.393114	psq	chr2R	10583125	10583513	264.458	chr2R	10583028	10583814	787	-0.4394	0.1019	psq	chr2R	10583029	10583893	328.709
chr3L	16411665	16411865	201	-0.342873	0.16976	0.393208	fax	chr3L	16411566	16411728	110.15	chr3L	16411519	16411919	401	-0.0759	0.7888	fax	chr3L	16411516	16411987	82.516
chr3R	24231228	24231428	201	-0.342419	0.169881	0.39337	Spase22-23	chr3R	24231334	24231484	63.433	chr3R	24231245	24231427	183	0.2114	0.4329	Spase22-23	chr3R	24231102	24231454	49.094
chr3L	5882004	5882204	201	-0.336216	0.170902	0.394197	CG13287	chr3L	5881258	5882241	191.422	chr3L	5881884	5882342	459	0.3364	0.2272	CG13287	chr3L	5881974	5882193	36.967
chr3R	30794849	30795049	201	-0.337331	0.172115	0.395001	wts	chr3R	30794708	30795235	305.289	chr3R	30794611	30795126	516	-0.0601	0.8387	wts	chr3R	30794621	30795213	195.073
chr2R	7326781	7326981	201	-0.339785	0.172426	0.395128	Dscam1	chr2R	7326773	7327028	380.711	chr2R	7326112	7327053	942	0.0252	0.9525	Dscam1	chr2R	7326864	7327014	110.208
chrX	7320919	7321119	201	-0.340466	0.172753	0.39524	CG1677	chrX	7320881	7321247	508.376	chrX	7320280	7321278	999	-0.4768	0.07066	CG1677	chrX	7320493	7321208	220.808
chr3R	29707252	29707452	201	-0.335584	0.177321	0.399904	NA	chr3R	29707265	29707484	240.681	chr3R	29707210	29707494	285	0.1724	0.7041	NA	chr3R	29707296	29707471	126.46
chr2L	12546385	12546585	201	-0.336568	0.177637	0.400114	bun	chr2L	12546342	12546511	92.969	chr2L	12546267	12546438	172	0.2674	0.3781	bun	chr2L	12546357	12546866	65.328
chr2L	12546385	12546585	201	-0.336568	0.177637	0.400114	bun	chr2L	12546342	12546511	92.969	chr2L	12546540	12546830	291	-0.2941	0.2811	bun	chr2L	12546357	12546866	65.328
chr3R	26947480	26947680	201	-0.329137	0.179323	0.401981	Spag1	chr3R	26947262	26947663	275.282	chr3R	26947206	26947713	508	0.0254	0.9551	CG14252	chr3R	26947244	26947656	231.447
chr3R	24218723	24218923	201	-0.33324	0.181536	0.404049	twin	chr3R	24218720	24218980	267.22	chr3R	24218678	24218981	304	0.1387	0.7212	twin	chr3R	24218669	24218964	103.901
chr2R	14503827	14504027	201	-0.331954	0.182729	0.405135	Cpsf160	chr2R	14503888	14504563	160.606	chr2R	14503805	14504035	231	0.3018	0.3224	Cpsf160	chr2R	14503791	14504026	53.024
chrX	19750997	19751197	201	-0.329757	0.184528	0.406983	Pmp70	chrX	19750892	19751291	430.917	chrX	19750975	19751212	238	0.4353	0.1117	Pmp70	chrX	19750684	19751228	124.882
chrX	10764238	10764438	201	-0.329525	0.186026	0.408021	Tango5	chrX	10764266	10764398	42.1	chrX	10763949	10764517	569	-0.407	0.05151	Tango5	chrX	10764079	10764549	45.255
chr2L	3580831	3581031	201	-0.326346	0.186268	0.408125	sob	chr2L	3580886	3581271	308.739	chr2L	3580643	3581175	533	0.072	0.8433	sob	chr2L	3580699	3581194	91.962
chr2L	15492050	15492250	201	-0.3293	0.186374	0.40824	NA	chr2L	15492089	15492436	44.354	chr2L	15491857	15492590	734	0.2842	0.4495	NA	chr2L	15491975	15492460	101.309
chrX	17886567	17886767	201	-0.328384	0.187691	0.40949	CG6788	chrX	17886470	17886825	183.714	chrX	17886492	17886792	301	0.1338	0.6909	CG6788	chrX	17886467	17886788	69.589
chr2R	23573241	23573441	201	-0.325236	0.188699	0.410264	apt	chr2R	23573084	23573514	243.62	chr2R	23573027	23573940	914	-0.3994	0.09699	apt	chr2R	23573069	23573995	119.701
chr3R	21499567	21499767	201	-0.325168	0.191674	0.412876	C15	chr3R	21499443	21499926	258.573	chr3R	21499553	21499966	414	0.2172	0.4646	C15	chr3R	21499428	21499877	212.402
chrX	16640790	16640990	201	-0.324487	0.193535	0.414047	mthl1	chrX	16640819	16640991	55.015	chrX	16640786	16641063	278	0.2552	0.4716	mthl1	chrX	16640683	16641111	151.717
chr2L	19571956	19572156	201	-0.320871	0.198549	0.418939	spi	chr2L	19571687	19572232	144.665	chr2L	19571956	19572232	277	0.2214	0.5419	spi	chr2L	19571876	19572223	67.826
chr2R	22242151	22242351	201	-0.320759	0.198425	0.418939	dve	chr2R	22242010	22242395	350.281	chr2R	22241992	22242345	354	0.1035	0.7295	dve	chr2R	22242013	22242382	101.369
chr2R	22243107	22243307	201	-0.316576	0.199189	0.419413	dve	chr2R	22242542	22243170	157.142	chr2R	22242824	22243362	539	0.2141	0.697	dve	chr2R	22242830	22243180	80.158
chr3R	8642668	8642868	201	-0.316461	0.203232	0.423912	FBgn0012027	chr3R	8642675	8642835	121.331	chr3R	8642700	8642894	195	0.3763	0.3213	FBgn0012027	chr3R	8642360	8642831	119.698
chr3R	8660378	8660578	201	-0.314954	0.203619	0.423986	bel	chr3R	8660360	8660543	41.744	chr3R	8660266	8660628	363	0.2263	0.5014	bel	chr3R	8660296	8660630	140.097
chr3L	4252224	4252424	201	-0.316975	0.203867	0.42419	CG1265	chr3L	4252215	4252407	124.794	chr3L	4251993	4252510	518	-0.108	0.9518	CG1265	chr3L	4252145	4252492	233.685
chr2R	10558906	10559106	201	-0.316928	0.203954	0.42419	psq	chr2R	10558820	10559083	219.93	chr2R	10558706	10559120	415	-0.1314	0.7163	psq	chr2R	10558860	10559085	78.332
chrX	687330	687530	201	-0.312839	0.204062	0.424299	sdk	chrX	687240	687481	57.181	chrX	687231	687558	328	0.0324	1	sdk	chrX	687357	688032	74.387
chr3R	16811868	16812068	201	-0.310302	0.208192	0.428307	abd-A	chr3R	16811752	16812109	384.654	chr3R	16811780	16812226	447	0.0418	1	abd-A	chr3R	16811684	16812208	851.265
chrX	19353637	19353837	201	-0.309613	0.208822	0.428629	kek5	chrX	19353521	19353894	113.514	chrX	19353564	19354057	494	-0.0023	1	kek5	chrX	19352682	19354083	347.189
chr2R	23759314	23759514	201	0.311542	0.208895	0.428629	sona	chr2R	23759392	23759612	239.187	chr2R	23759308	23759477	170	-0.0529	0.7913	sona	chr2R	23759454	23759611	112.3
chr2R	19275447	19275647	201	-0.309712	0.21087	0.430756	rib	chr2R	19275235	19275915	751.013	chr2R	19275378	19275920	543	0.1334	0.9187	rib	chr2R	19275210	19275883	294.165
chr3R	16830113	16830313	201	-0.311301	0.211383	0.431515	abd-A	chr3R	16830008	16830355	280.827	chr3R	16830050	16830354	305	0.3804	0.06427	abd-A	chr3R	16829843	16830449	365.747
chr2R	17716512	17716712	201	-0.308731	0.213853	0.434173	CG6424	chr2R	17716376	17716944	150.12	chr2R	17716203	17716864	662	-0.216	0.6316	CG6424	chr2R	17716544	17716820	52.841
chr3R	25184460	25184660	201	-0.309875	0.214263	0.434212	dan	chr3R	25184397	25184567	97.689	chr3R	25184360	25184620	261	0.4187	0.1389	dan	chr3R	25184425	25185069	59.886
chr3R	29764406	29764606	201	-0.308314	0.214498	0.434448	kay	chr3R	29764422	29764600	159.375	chr3R	29764069	29764707	639	-0.3097	0.2869	kay	chr3R	29764453	29764582	41.086
chr3R	16715682	16715882	201	-0.308398	0.216305	0.436151	Ubx	chr3R	16715571	16716038	409.876	chr3R	16715613	16715994	382	0.1031	1	Ubx	chr3R	16715542	16716081	303.376
chrX	10731594	10731794	201	-0.304666	0.216613	0.436151	stx	chrX	10731320	10731886	588.518	chrX	10731510	10731851	342	-0.0212	0.9541	stx	chrX	10731214	10731848	486.693
chr3L	199204	199404	201	-0.304642	0.219213	0.438658	rno	chr3L	199179	199563	183.805	chr3L	199156	199392	237	0.2215	0.5014	rno	chr3L	199062	199533	184.208
chr3L	21843402	21843602	201	-0.30359	0.219987	0.439253	P5CDh1	chr3L	21843415	21843583	68.225	chr3L	21843295	21843731	437	-0.484	0.1594	P5CDh1	chr3L	21843410	21843641	37.869
chr3R	6978332	6978532	201	0.305659	0.220333	0.439713	Antp	chr3R	6978398	6978597	42.1	chr3R	6978256	6978656	401	0.3676	0.2006	Antp	chr3R	6978283	6978705	101.369
chr2R	13584790	13584990	201	-0.300943	0.220515	0.440019	CG6191	chr2R	13584653	13584967	105.928	chr2R	13584743	13585311	569	-0.039	0.8804	CG6191	chr2R	13584053	13585029	107.004
chr2R	16102957	16103157	201	-0.305231	0.220759	0.440288	Rho1	chr2R	16102944	16103491	178.98	chr2R	16102956	16103174	219	0.475	0.1104	Rho1	chr2R	16102524	16103220	138.106
chr3R	20829833	20830033	201	-0.30375	0.222271	0.441328	FBgn0027493	chr3R	20829835	20830024	79.681	chr3R	20829787	20830169	383	0.3549	0.155	FBgn0027493	chr3R	20829803	20830197	49.094
chr3R	23819165	23819365	201	-0.301364	0.222371	0.441412	CG33111	chr3R	23818804	23819370	105.999	chr3R	23818913	23819412	500	0.2541	0.4025	CG33111	chr3R	23819091	23819421	42.044
chr3R	22794587	22794787	201	-0.293713	0.224182	0.442758	NA	chr3R	22794653	22794818	188.262	chr3R	22794664	22794741	78	0.272	0.6916	NA	chr3R	22794676	22794815	60.319
chr2R	24813755	24813955	201	-0.298165	0.226598	0.445624	Dll	chr2R	24813769	24814094	134.074	chr2R	24813631	24814036	406	-0.1557	0.8864	Dll	chr2R	24813713	24814117	173.207
chr3L	685176	685376	201	-0.295292	0.230216	0.448422	CG3386	chr3L	685210	685381	113.276	chr3L	685148	685351	204	0.4789	0.06059	CG3386	chr3L	685174	685720	57.042
chrX	13413043	13413243	201	-0.298004	0.231993	0.450362	CG1998	chrX	13412909	13413216	172.325	chrX	13413009	13413341	333	0.4612	0.1226	CG1998	chrX	13413047	13413288	61.145
chr2L	2013919	2014119	201	-0.297643	0.232638	0.45063	CG4238	chr2L	2013899	2014303	242.483	chr2L	2013815	2014188	374	-0.457	0.2009	CG4238	chr2L	2014013	2014202	37.869
chr2R	9231381	9231581	201	-0.296253	0.232912	0.450845	hig	chr2R	9231276	9231781	271.212	chr2R	9231116	9231876	761	0.3628	0.1917	hig	chr2R	9231357	9231834	107.208
chr3R	30764191	30764391	201	-0.291899	0.237251	0.45444	zfh1	chr3R	30764101	30764509	475.533	chr3R	30764121	30764443	323	0.0439	1	zfh1	chr3R	30764096	30764505	254.58
chr3R	6761239	6761439	201	-0.292978	0.237876	0.455058	Ama	chr3R	6761166	6761507	60.993	chr3R	6761054	6761516	463	-0.1933	0.5341	Ama	chr3R	6761164	6761425	53.024
chr3L	1463641	1463841	201	-0.292748	0.238523	0.455193	rho	chr3L	1463535	1464222	44.354	chr3L	1463530	1463944	415	0.0947	1	rho	chr3L	1463427	1463999	527.924
chr3L	16043588	16043788	201	-0.29252	0.240806	0.456722	Diap1	chr3L	16043478	16044139	120.03	chr3L	16043457	16044093	637	-0.4626	0.1246	Diap1	chr3L	16043425	16044636	91.206
chrX	9692732	9692932	201	-0.291579	0.242233	0.45805	btd	chrX	9692690	9692990	163.011	chrX	9692733	9692922	190	0.3984	0.161	btd	chrX	9692648	9693009	96.635
chr3R	4346635	4346835	201	-0.284976	0.245767	0.460509	hkb	chr3R	4346642	4347014	120.715	chr3R	4346309	4347115	807	-0.1395	0.5926	hkb	chr3R	4346427	4347120	511.162
chr3R	13985319	13985519	201	-0.287886	0.248327	0.462802	rdx	chr3R	13985312	13985558	162.345	chr3R	13985207	13985694	488	0.3736	0.1698	rdx	chr3R	13985258	13985606	107.218
chr2R	22270694	22270894	201	-0.276524	0.250089	0.464265	dve	chr2R	22270586	22271051	269.923	chr2R	22270602	22271426	825	0.0609	0.8712	dve	chr2R	22270547	22271133	87.353
chr3L	17349703	17349903	201	0.275104	0.253863	0.467398	Mip	chr3L	17349748	17349884	103.147	chr3L	17349601	17349926	326	0.1874	0.5206	Mip	chr3L	17349751	17349886	106.008
chr2L	3825473	3825673	201	-0.278617	0.260469	0.474063	slp1	chr2L	3825362	3825770	522.472	chr2L	3825437	3825749	313	-0.1204	0.9333	slp1	chr2L	3825280	3825869	465.694
chr2R	22561466	22561666	201	-0.279721	0.26118	0.474904	px	chr2R	22561398	22562172	93.298	chr2R	22561328	22561863	536	-0.0032	1	px	chr2R	22561519	22562252	49.094
chr2R	7418565	7418765	201	-0.279514	0.262205	0.475825	so	chr2R	7418453	7418863	443.437	chr2R	7418477	7418806	330	-0.0424	0.9169	so	chr2R	7418456	7419494	538.391
chr2R	12980826	12981026	201	-0.276479	0.267207	0.480361	Psc	chr2R	12980644	12981137	374.37	chr2R	12980552	12981354	803	-0.055	1	Psc	chr2R	12980127	12981325	470.709
chrX	10822767	10822967	201	-0.274624	0.269687	0.482845	FBgn0267184	chrX	10822840	10823026	39.907	chrX	10822680	10823089	410	0.0704	0.9646	FBgn0267184	chrX	10822644	10823093	78.605
chr3R	15920806	15921006	201	-0.274075	0.271582	0.484371	Fbxl7	chr3R	15920987	15921140	85.72	chr3R	15920740	15921401	662	-0.0184	1	Fbxl7	chr3R	15920778	15921238	134.626
chr2L	18881264	18881464	201	-0.268475	0.271733	0.484371	tup	chr2L	18881256	18881792	906.141	chr2L	18880750	18881694	945	0.1483	0.8898	tup	chr2L	18881087	18881791	281.439
chr3R	10826825	10827025	201	0.26869	0.274828	0.486882	Cad86C	chr3R	10826919	10827069	279.564	chr3R	10826837	10826911	75	-0.1076	0.961	Cad86C	chr3R	10826893	10827111	130.262
chr3L	15729352	15729552	201	-0.265457	0.278553	0.490133	comm	chr3L	15729317	15729564	62.89	chr3L	15729122	15729690	569	0.4467	0.07897	comm	chr3L	15729192	15729712	195.028
chrX	12654266	12654466	201	-0.268513	0.280919	0.492692	CkIalpha	chrX	12654280	12654573	74.532	chrX	12654237	12654850	614	0.3869	0.3142	CkIalpha	chrX	12654219	12654540	80.736
chr3R	28336058	28336258	201	-0.266038	0.285365	0.496603	larp	chr3R	28336184	28336436	68.004	chr3R	28335829	28336282	454	0.3044	0.349	larp	chr3R	28335446	28336498	90.076
chr2R	15911995	15912195	201	-0.265743	0.286339	0.497843	sli	chr2R	15912068	15912209	288.783	chr2R	15911864	15912252	389	-0.287	0.2996	sli	chr2R	15912074	15912204	58.182
chr2L	11445583	11445783	201	-0.264375	0.288182	0.49985	salm	chr2L	11445577	11446566	464.755	chr2L	11445463	11446123	661	-0.3039	0.2826	salm	chr2L	11445491	11446401	294.285
chr2R	21703152	21703352	201	-0.259633	0.288487	0.500033	HmgD	chr2R	21702927	21703218	113.475	chr2R	21703107	21703371	265	0.1961	0.5114	HmgD	chr2R	21702802	21703388	145.375
chr3L	10325634	10325834	201	-0.260408	0.289486	0.500754	FBgn0267668	chr3L	10325584	10325819	143.385	chr3L	10325710	10325984	275	-0.0225	0.9467	FBgn0267668	chr3L	10325580	10325806	67.486
chrX	7082495	7082695	201	-0.263651	0.289792	0.500868	Sxl	chrX	7082684	7082835	93.044	chrX	7082428	7082833	406	-0.4223	0.2807	Sxl	chrX	7082670	7082851	129.057
chr3L	21476525	21476725	201	-0.261139	0.292584	0.50302	croc	chr3L	21476556	21477068	581.229	chr3L	21476417	21477084	668	0.4035	0.05459	croc	chr3L	21476432	21477081	366.789
chr2R	14000960	14001160	201	-0.258328	0.299879	0.50926	mam	chr2R	14000908	14001061	67.675	chr2R	14000653	14001202	550	0.1194	0.6673	mam	chr2R	14000765	14001110	121.322
chrX	4617378	4617578	201	-0.256513	0.302416	0.511825	peb	chrX	4617316	4617515	68.758	chrX	4617204	4617650	447	0.3599	0.3133	peb	chrX	4617213	4617644	65.328
chr3L	21277039	21277239	201	0.252236	0.304649	0.513536	AcCoAS	chr3L	21276734	21277215	118.792	chr3L	21276691	21277215	525	-0.1786	0.5802	AcCoAS	chr3L	21276682	21277202	59.886
chr3R	14037469	14037669	201	-0.252922	0.307712	0.516149	CG9922	chr3R	14037534	14037749	512.713	chr3R	14037500	14037606	107	0.0382	0.9319	CG9922	chr3R	14037420	14037765	321.539
chr2L	21860728	21860928	201	-0.253773	0.308369	0.516694	FBgn0266222	chr2L	21860816	21860954	113.006	chr2L	21860618	21860942	325	0.3284	0.2835	FBgn0266222	chr2L	21860746	21860955	39.755
chr3R	25647115	25647315	201	-0.252469	0.310558	0.518664	jigr1	chr3R	25647097	25647361	77.174	chr3R	25647115	25647449	335	0.1998	0.4717	jigr1	chr3R	25646777	25647356	69.589
chr2L	19791112	19791312	201	-0.250115	0.313273	0.520676	CdGAPr	chr2L	19791063	19791332	319.54	chr2L	19791010	19791345	336	0.2945	0.1872	CdGAPr	chr2L	19790953	19791396	246.325
chr2R	13824149	13824349	201	-0.247598	0.319985	0.525949	fl(2)d	chr2R	13823911	13824399	110.559	chr2R	13824092	13824348	257	0.3713	0.1703	fl(2)d	chr2R	13824214	13824821	76.996
chr3L	3964161	3964361	201	-0.241869	0.324444	0.530189	CG12605	chr3L	3964118	3964558	575.432	chr3L	3964014	3964370	357	0.2306	0.4296	CG12605	chr3L	3964139	3964356	251.09
chr3R	23295397	23295597	201	-0.242804	0.329393	0.533955	pnt	chr3R	23295301	23295710	223.637	chr3R	23295345	23295713	369	0.2866	0.4427	pnt	chr3R	23295299	23295674	82.889
chrX	935219	935419	201	-0.239417	0.334069	0.537855	TRAM	chrX	935080	935540	48.463	chrX	935070	935846	777	0.3885	0.2484	TRAM	chrX	935105	935829	55.843
chr2R	22860294	22860494	201	-0.238101	0.338964	0.541741	inaD	chr2R	22860183	22860659	449.889	chr2R	22860203	22860608	406	0.4947	0.1674	inaD	chr2R	22860193	22860659	336.303
chr2L	6156751	6156951	201	-0.235794	0.342682	0.544942	CG31639	chr2L	6156772	6156934	249.662	chr2L	6156490	6157049	560	-0.3007	0.4005	CG31639	chr2L	6156799	6156933	92.542
chr3R	8820624	8820824	201	-0.228461	0.348747	0.549209	CG8369	chr3R	8820750	8820926	38.555	chr3R	8820549	8821081	533	-0.1162	0.9694	CG8369	chr3R	8820464	8821010	181.869
chr2L	18629268	18629468	201	-0.233164	0.349203	0.549757	MESR3	chr2L	18629209	18629480	721.951	chr2L	18629194	18629519	326	0.1431	0.7644	MESR3	chr2L	18629193	18629464	501.003
chrX	617530	617730	201	-0.233019	0.349503	0.550048	CG13366	chrX	617438	617638	38.418	chrX	617508	617727	220	0.0585	1	CG13366	chrX	617502	617732	45.548
chr2L	2010584	2010784	201	-0.230609	0.349532	0.550048	CG4238	chr2L	2010663	2011002	167.3	chr2L	2010619	2010742	124	0.1437	0.9137	CG4238	chr2L	2010679	2010997	181.455
chr2R	17593142	17593342	201	-0.228784	0.350106	0.550235	Smurf	chr2R	17593131	17593314	70.997	chr2R	17592721	17593758	1038	-0.3812	0.05823	Smurf	chr2R	17592499	17593633	47.406
chr2R	21480772	21480972	201	-0.231374	0.351884	0.551415	Sdc	chr2R	21480703	21481309	144.766	chr2R	21480800	21480971	172	0.2879	0.3802	Sdc	chr2R	21480815	21481164	113.21
chrX	9355852	9356052	201	-0.228755	0.357758	0.555926	BCL7-like	chrX	9355765	9356071	57.309	chrX	9355822	9356050	229	0.2475	0.4416	BCL7-like	chrX	9355756	9356444	82.809
chrX	2112738	2112938	201	-0.228726	0.358039	0.556007	csw	chrX	2112774	2113037	73.174	chrX	2112764	2112965	202	0.2545	0.4864	csw	chrX	2112827	2112964	37.152
chr3R	16798629	16798829	201	-0.224767	0.360898	0.558016	FBgn0267314	chr3R	16798792	16798941	41.744	chr3R	16798518	16798961	444	0.3617	0.2589	FBgn0267314	chr3R	16798539	16798937	58.477
chr2R	10535076	10535276	201	-0.226868	0.362246	0.558918	lola	chr2R	10535008	10535486	194.465	chr2R	10534770	10535625	856	-0.3646	0.0781	lola	chr2R	10534733	10536484	312.098
chr2R	21101703	21101903	201	-0.226248	0.363513	0.559885	ktub	chr2R	21101655	21101918	111.853	chr2R	21101582	21102398	817	0.1217	0.9081	ktub	chr2R	21101541	21102090	144.831
chr2L	11210480	11210680	201	-0.225422	0.364075	0.560174	ab	chr2L	11210423	11210583	113.475	chr2L	11210476	11210768	293	0.4529	0.09039	ab	chr2L	11210333	11210757	261.683
chr3R	26947215	26947415	201	-0.223909	0.363995	0.560174	CG14252	chr3R	26947262	26947663	275.282	chr3R	26947206	26947713	508	0.0254	0.9551	CG14252	chr3R	26947244	26947656	231.447
chr3R	13013043	13013243	201	-0.222968	0.366157	0.562396	CtBP	chr3R	13013037	13013305	50.455	chr3R	13013021	13013300	280	0.4091	0.07647	CtBP	chr3R	13013023	13013253	53.024
chrX	4411458	4411658	201	-0.183559	0.367465	0.563208	bi	chrX	4411281	4411828	675.881	chrX	4411275	4411782	508	0.3706	0.3559	bi	chrX	4411276	4411809	402.805
chr3R	16899771	16899971	201	-0.220957	0.372867	0.567259	FBgn0264857	chr3R	16899277	16900051	175.618	chr3R	16899492	16900006	515	0.283	0.397	FBgn0264857	chr3R	16899195	16900153	394.413
chr2L	16422765	16422965	201	-0.221409	0.373937	0.568273	CG5888	chr2L	16422607	16423387	478.858	chr2L	16422709	16423296	588	0.1495	0.6622	CG5888	chr2L	16422727	16423277	320.69
chr3L	13211153	13211353	201	-0.216429	0.380776	0.573007	FBgn0052126	chr3L	13211213	13211370	109.611	chr3L	13211145	13211337	193	0.4898	0.2669	FBgn0052126	chr3L	13211244	13211683	135.43
chr2L	5093187	5093387	201	-0.217191	0.382165	0.574367	Pgant5	chr2L	5092951	5093315	136.769	chr2L	5092717	5093386	670	0.3515	0.09072	Pgant5	chr2L	5093232	5093547	41.906
chrX	17713131	17713331	201	-0.168079	0.382146	0.574367	raskol	chrX	17713115	17713337	153.332	chrX	17712945	17713420	476	-0.4457	0.4147	raskol	chrX	17712995	17713384	168.146
chr2L	19362836	19363036	201	-0.215565	0.383651	0.575912	dnt	chr2L	19363011	19363138	44.506	chr2L	19362636	19363006	371	-0.1493	0.6212	dnt	chr2L	19362772	19364010	499.133
chr2R	17392147	17392347	201	-0.213256	0.384529	0.576236	CG10939	chr2R	17392214	17392344	80.655	chr2R	17392105	17392791	687	0.2894	0.2537	CG10939	chr2R	17392330	17392730	53.191
chrX	8421212	8421412	201	-0.214223	0.387472	0.578392	Trf2	chrX	8421257	8421504	65.946	chrX	8421127	8421476	350	0.3938	0.2163	Trf2	chrX	8421170	8421486	100.057
chr3L	10325152	10325352	201	-0.213101	0.390471	0.580262	FBgn0267668	chr3L	10325127	10325388	54.293	chr3L	10324895	10325456	562	0.4428	0.09542	FBgn0267668	chr3L	10325015	10325441	141.243
chrX	7306566	7306766	201	-0.212607	0.391009	0.580496	brk	chrX	7306562	7306830	61.74	chrX	7306509	7306724	216	0.4984	0.1649	brk	chrX	7306612	7306934	57.042
chrX	2634600	2634800	201	-0.211024	0.39629	0.585541	sgg	chrX	2634430	2634853	146.292	chrX	2634601	2634805	205	0.0991	0.7893	sgg	chrX	2634314	2634852	111.464
chr3L	13493776	13494154	379	-0.20823	0.402844	0.591269	Tgi	chr3L	13493828	13493962	104.92	chr3L	13493765	13494103	339	-0.3896	0.2312	Tgi	chr3L	13493832	13493963	56.231
chrX	18864219	18864419	201	-0.205798	0.403696	0.591909	CG7326	chrX	18864196	18864453	101.183	chrX	18864194	18864516	323	0.2628	0.3889	CG7326	chrX	18863733	18864501	65.328
chr2L	13513379	13513579	201	-0.207139	0.404943	0.593322	B4	chr2L	13513420	13513616	53.401	chr2L	13513085	13513692	608	0.2154	0.5041	B4	chr2L	13513351	13513591	49.225
chr2R	16499956	16500156	201	-0.203556	0.408233	0.595986	Sema2a	chr2R	16499908	16500038	48.463	chr2R	16499808	16500236	429	-0.1309	0.6827	Sema2a	chr2R	16499917	16500194	69.589
chrX	7307688	7307888	201	-0.204609	0.409072	0.596504	brk	chrX	7307493	7307893	83.536	chrX	7307455	7308275	821	0.449	0.1822	brk	chrX	7307458	7308018	106.162
chrX	8676836	8677036	201	-0.204049	0.41032	0.597125	Rubicon	chrX	8676667	8676970	42.1	chrX	8676704	8677120	417	0.0263	1	Rubicon	chrX	8676711	8677109	73.924
chr3L	17446294	17446494	201	-0.198238	0.414289	0.600436	CG18265	chr3L	17446275	17446509	292.977	chr3L	17445996	17446442	447	0.1817	0.5544	CG18265	chr3L	17446283	17446548	138.896
chr2R	13337308	13337508	201	-0.201022	0.416025	0.601692	FBgn0265104	chr2R	13337136	13337533	48.463	chr2R	13337244	13337800	557	0.4192	0.1244	FBgn0265104	chr2R	13337152	13337742	78.332
chr3L	8065957	8066157	201	-0.196617	0.417788	0.602984	FBgn0052361	chr3L	8065976	8066117	47.282	chr3L	8065934	8066219	286	0.3387	0.3173	FBgn0052361	chr3L	8065637	8066111	78.424
chrX	20694262	20694462	201	-0.200983	0.41937	0.604465	run	chrX	20693870	20694460	421.944	chrX	20693756	20694739	984	-0.3619	0.2995	run	chrX	20693676	20694646	515.887
chrX	18312624	18312824	201	-0.198451	0.424325	0.608779	FBgn0267168	chrX	18312482	18312959	75.657	chrX	18312562	18312934	373	0.072	1	FBgn0267168	chrX	18312510	18313039	123.8
chr2R	20907323	20907523	201	-0.196534	0.424998	0.609043	CAH15	chr2R	20907340	20907563	162.364	chr2R	20907059	20907966	908	-0.3823	0.2162	CAH15	chr2R	20907192	20907753	87.15
chrX	12649905	12650105	201	0.197741	0.425902	0.609387	Tomosyn	chrX	12649274	12650050	490.178	chrX	12649966	12650059	94	-0.0594	0.8968	Tomosyn	chrX	12649860	12650069	219.854
chrX	681283	681483	201	0.197217	0.427874	0.610656	FBgn0286919	chrX	681317	681504	853.34	chrX	681239	681550	312	-0.2021	0.6931	FBgn0286919	chrX	681286	681542	562.902
chr3R	9488668	9488868	201	-0.190324	0.430765	0.612111	CG16779	chr3R	9488687	9488846	175.043	chr3R	9488771	9488935	165	-0.4887	0.2694	CG16779	chr3R	9488674	9488835	53.22
chrX	7275795	7275995	201	-0.195556	0.431421	0.612681	FBgn0265457	chrX	7275841	7276005	204.571	chrX	7275793	7275992	200	-0.4905	0.2269	FBgn0265457	chrX	7275855	7276000	103.198
chr2L	2010827	2011027	201	-0.193148	0.431371	0.612681	CG4238	chr2L	2010663	2011002	167.3	chr2L	2010871	2011049	179	-0.2501	0.5196	CG4238	chr2L	2010679	2010997	181.455
chr3R	9985704	9985904	201	-0.194482	0.433836	0.615421	Art4	chr3R	9985746	9985912	121.52	chr3R	9985713	9986134	422	0.1101	0.7529	Art4	chr3R	9985778	9986299	80.096
chr2R	24712813	24713013	201	-0.192271	0.43661	0.618092	Mid1	chr2R	24712826	24712994	305.365	chr2R	24712849	24713123	275	0.2651	0.6423	Mid1	chr2R	24712857	24712986	46.934
chrX	7626672	7626872	201	-0.19233	0.437989	0.61882	ct	chrX	7626766	7627461	351.273	chrX	7626703	7627629	927	0.4367	0.2054	ct	chrX	7626723	7627588	230.068
chr3R	18108536	18108736	201	-0.189283	0.443523	0.623017	sr	chr3R	18108647	18108789	121.163	chr3R	18108499	18108724	226	0.2971	0.4119	sr	chr3R	18108641	18109112	98.649
chr2R	10432460	10432660	201	-0.188327	0.448863	0.62728	RanBPM	chr2R	10432325	10432657	106.823	chr2R	10432431	10432718	288	0.074	0.9195	RanBPM	chr2R	10432399	10432661	53.191
chrX	2317582	2317782	201	-0.188151	0.449201	0.627465	Raf	chrX	2317394	2317667	80.131	chrX	2317568	2317829	262	-0.0957	0.8505	Raf	chrX	2317408	2317596	53.024
chr2L	4020311	4020511	201	-0.186357	0.452113	0.630493	NA	chr2L	4020332	4020518	208.994	chr2L	4020355	4020480	126	0.1393	0.7918	NA	chr2L	4020372	4020515	69.172
chrX	16839891	16840091	201	-0.183887	0.458727	0.63657	RSG7	chrX	16840077	16840221	50.647	chrX	16839861	16840115	255	0.4491	0.2258	RSG7	chrX	16839910	16840308	451.144
chr2R	21646597	21646797	201	-0.1813	0.462458	0.639768	CG10082	chr2R	21646444	21646931	137.681	chr2R	21646545	21646920	376	0.2264	0.4185	CG10082	chr2R	21646623	21646864	54.518
chrX	6862710	6862910	201	-0.180657	0.467716	0.643653	CG14434	chrX	6862503	6863210	204.361	chrX	6862547	6863164	618	0.0067	1	CG14434	chrX	6862536	6863140	268.425
chr2L	5009633	5009833	201	-0.177952	0.469842	0.645053	SelT	chr2L	5009481	5009814	73.403	chr2L	5009649	5009940	292	0.1688	0.5675	CG31917	chr2L	5009514	5009923	49.094
chrX	9675031	9675231	201	-0.177234	0.47327	0.647941	nej	chrX	9674997	9675331	354.085	chrX	9675036	9675232	197	0.2299	0.534	nej	chrX	9675164	9675321	153.658
chrX	18298040	18298240	201	-0.169859	0.494718	0.665199	NA	chrX	18297850	18298651	315.045	chrX	18298132	18298224	93	-0.4002	0.3804	NA	chrX	18297919	18298708	164.371
chr2R	12991771	12991971	201	-0.162692	0.510659	0.677276	CG33798	chr2R	12991712	12991975	271.694	chr2R	12991683	12992098	416	0.2671	0.3921	CG33798	chr2R	12991705	12992016	291.3
chr2R	21707718	21707918	201	-0.156645	0.518551	0.68308	HmgD	chr2R	21707721	21707922	512.422	chr2R	21707468	21707997	530	-0.3251	0.4017	HmgD	chr2R	21707629	21708038	420.331
chrX	13805590	13805790	201	-0.157636	0.523307	0.686733	inaE	chrX	13805517	13805911	845.773	chrX	13805198	13805912	715	0.3794	0.285	inaE	chrX	13805610	13805872	123.279
chr2R	22243757	22243957	201	-0.158198	0.524715	0.687693	dve	chr2R	22243757	22243983	120.082	chr2R	22243680	22244174	495	0.4097	0.1279	dve	chr2R	22243733	22244110	45.255
chr2L	8416448	8416648	201	-0.155722	0.531175	0.693135	Akap200	chr2L	8416442	8416620	41.744	chr2L	8416347	8417155	809	0.0423	1	Akap200	chr2L	8416205	8417094	237.539
chr2R	20111230	20111430	201	-0.150197	0.539005	0.698493	18w	chr2R	20111103	20111473	216.827	chr2R	20111049	20111794	746	-0.0631	1	18w	chr2R	20111058	20111676	181.722
chrX	7627027	7627227	201	-0.150222	0.540891	0.700283	ct	chrX	7626766	7627461	351.273	chrX	7626703	7627629	927	0.4367	0.2054	ct	chrX	7626723	7627588	230.068
chr3R	8187803	8188003	201	-0.147754	0.550977	0.708884	NA	chr3R	8187803	8188019	148.077	chr3R	8187574	8188147	574	0.1083	0.7231	NA	chr3R	8187788	8188136	135.924
chr2L	18152385	18152585	201	-0.145339	0.556366	0.712629	CG17681	chr2L	18152386	18152514	37.256	chr2L	18152233	18152729	497	-0.0811	1	CG17681	chr2L	18152346	18152747	146.457
chr2R	17460599	17460799	201	-0.139706	0.565007	0.718804	CG14478	chr2R	17460697	17460832	101.5	chr2R	17460610	17460816	207	-0.1995	0.5164	CG14478	chr2R	17460661	17460887	111.515
chr3L	8506496	8506696	201	-0.142833	0.565311	0.71895	CG43163	chr3L	8506579	8506720	48.463	chr3L	8506507	8507344	838	-0.1652	0.7661	Pus7	chr3L	8506990	8507378	59.886
chr2R	6162441	6162641	201	-0.130981	0.592946	0.740282	EcR	chr2R	6162518	6162786	39.532	chr2R	6162427	6162763	337	0.0212	0.92	EcR	chr2R	6161982	6162640	65.788
chr3L	17979749	17979949	201	-0.128156	0.599844	0.744906	Eip75B	chr3L	17979611	17979797	481.16	chr3L	17979652	17980006	355	0.4633	0.1804	Eip75B	chr3L	17979611	17979804	224.614
chr3R	31725602	31725802	201	-0.127948	0.603868	0.747454	ttk	chr3R	31725554	31725994	82.826	chr3R	31725503	31725850	348	0.4494	0.07015	ttk	chr3R	31725509	31725975	130.961
chrX	9778570	9778770	201	-0.128235	0.605622	0.748327	CG1354	chrX	9778481	9778860	486.567	chrX	9778577	9778813	237	0.3987	0.3374	CG1354	chrX	9778579	9778852	49.094
chrX	7226119	7226319	201	0.128357	0.60571	0.748327	CG9650	chrX	7225949	7226357	215.341	chrX	7226081	7226492	412	-0.1529	0.6893	CG9650	chrX	7225943	7226587	313.133
chr3R	21822291	21822491	201	0.126359	0.608249	0.750147	CASK	chr3R	21822397	21822575	183.86	chr3R	21822382	21822449	68	0.3916	0.5186	CASK	chr3R	21822398	21822531	37.935
chrX	17789532	17789732	201	-0.125255	0.610907	0.752726	OdsH	chrX	17789302	17790172	650.842	chrX	17789427	17790031	605	0.1686	0.6757	OdsH	chrX	17789488	17789947	225.884
chrX	16687620	16687820	201	-0.123991	0.617464	0.756919	2021-09-04	chrX	16687539	16687703	193.646	chrX	16687527	16687812	286	0.1766	0.6343	2021-09-04	chrX	16687557	16687690	126.592
chr3L	8060519	8060719	201	-0.11933	0.623251	0.760343	bip1	chr3L	8060269	8060790	107.548	chr3L	8060141	8060856	716	0.262	0.4134	bip1	chr3L	8060271	8060820	74.983
chrX	4589859	4590059	201	-0.121049	0.626327	0.762984	FBgn0052773	chrX	4589850	4590090	60.456	chrX	4589795	4590140	346	0.1715	0.7304	FBgn0052773	chrX	4589879	4590505	41.157
chr2L	8683727	8683927	201	-0.118551	0.630437	0.765771	CG9289	chr2L	8683803	8683937	105.581	chr2L	8683729	8684057	329	0.2588	0.4674	CG9289	chr2L	8683408	8683964	441.065
chr2R	9548172	9548372	201	-0.119316	0.630791	0.765924	CG1888	chr2R	9548144	9548452	481.352	chr2R	9548091	9548407	317	0.0061	0.9545	CG1888	chr2R	9548167	9548733	215.247
chr3R	14019521	14019721	201	-0.117645	0.635548	0.768736	rdx	chr3R	14019598	14019731	52.909	chr3R	14019422	14019726	305	0.1862	0.5812	rdx	chr3R	14019599	14019728	51.444
chr2L	18866544	18866744	201	0.117326	0.636742	0.769465	tup	chr2L	18866544	18866789	1307	chr2L	18866671	18866748	78	0.3445	0.6273	tup	chr2L	18866517	18866797	906.917
chrX	12640754	12640954	201	-0.113419	0.647881	0.776484	Tomosyn	chrX	12640727	12641005	1473.32	chrX	12640727	12641010	284	-0.3729	0.2519	Tomosyn	chrX	12640760	12641037	1029.1
chr3R	27441427	27441627	201	0.111482	0.651778	0.779056	CG44290	chr3R	27441283	27441579	48.463	chr3R	27441282	27441689	408	-0.077	0.8358	CG43447	chr3R	27441435	27441645	41.511
chr2R	22561953	22562153	201	-0.110186	0.655592	0.780981	px	chr2R	22561398	22562172	93.298	chr2R	22561938	22562126	189	-0.0513	0.8664	px	chr2R	22561519	22562252	49.094
chr3L	11246013	11246213	201	-0.107474	0.663347	0.786226	FBgn0265924	chr3L	11246077	11246330	179.322	chr3L	11245957	11246070	114	0.1641	0.7035	FBgn0265924	chr3L	11246058	11246638	116.038
chrX	6744308	6744613	306	-0.106561	0.666408	0.788259	RpL17	chrX	6744461	6744631	178.615	chrX	6744149	6744428	280	-0.1884	0.6149	RpL17	chrX	6744078	6744632	163.556
chr2L	10200916	10201116	201	-0.106183	0.668953	0.790267	RpL7	chr2L	10200924	10201136	55.015	chr2L	10200903	10201196	294	0.1547	0.7002	RpL7	chr2L	10200870	10201151	87.353
chr2L	5293057	5293257	201	0.102999	0.67376	0.794216	vri	chr2L	5293026	5293159	48.463	chr2L	5293115	5293253	139	-0.4083	0.306	vri	chr2L	5292986	5293167	37.869
chr2L	8541542	8541742	201	-0.101797	0.675443	0.794919	Sema1a	chr2L	8541540	8541901	93.478	chr2L	8541503	8541709	207	-0.1628	0.7159	Sema1a	chr2L	8541545	8541894	46.877
chr2R	17462144	17462344	201	-0.10296	0.67818	0.796866	CG14478	chr2R	17462093	17462313	1267.16	chr2R	17462219	17462486	268	-0.2646	0.3655	CG14478	chr2R	17462058	17462357	895.092
chrX	8533889	8534089	201	0.102713	0.678295	0.796899	Nrg	chrX	8533902	8534253	255.39	chrX	8533834	8534281	448	0.4143	0.1798	Nrg	chrX	8533886	8534293	162.034
chr2R	20916181	20916381	201	-0.1023	0.678659	0.797182	FBgn0020617	chr2R	20916227	20916406	498.439	chr2R	20916203	20916329	127	0.3277	0.6345	FBgn0020617	chr2R	20916177	20916449	308.956
chrX	6669089	6669289	201	-0.0998472	0.687434	0.802893	CG3198	chrX	6669037	6669564	524.692	chrX	6669070	6669142	73	-0.1645	0.9288	CG3198	chrX	6669100	6669566	339.702
chrX	4690859	4691059	201	-0.0995276	0.687707	0.803064	ctp	chrX	4690883	4691129	371.422	chrX	4690798	4691139	342	0.0505	0.9151	ctp	chrX	4690955	4691136	198.203
chr2L	11977839	11978039	201	0.0934928	0.705248	0.815621	NA	chr2L	11977765	11978040	566.01	chr2L	11977828	11978030	203	-0.2537	0.4754	NA	chr2L	11977842	11978030	251.247
chrX	5579632	5579832	201	-0.0931943	0.707124	0.81646	NA	chrX	5579398	5579927	594.024	chrX	5579518	5579839	322	0.2287	0.4821	NA	chrX	5579553	5579876	130.961
chr2L	12507745	12507945	201	-0.0919603	0.71141	0.819299	bun	chr2L	12507733	12507972	145.927	chr2L	12507673	12508332	660	-0.3368	0.2646	bun	chr2L	12507700	12507931	113.819
chr3R	13395230	13395430	201	-0.0803472	0.739036	0.838693	CCHa2	chr3R	13395214	13395389	238.079	chr3R	13395188	13395442	255	0.3349	0.3416	CCHa2	chr3R	13395205	13395386	86.716
chr2R	7488862	7489062	201	-0.0809017	0.744691	0.842664	wech	chr2R	7488711	7488888	98.641	chr2R	7488890	7489068	179	-0.1502	0.6735	wech	chr2R	7488583	7489139	45.255
chrX	7117730	7117930	201	0.0791079	0.748647	0.84521	NA	chrX	7117743	7117963	371.322	chrX	7117549	7117937	389	0.2599	0.5524	NA	chrX	7117630	7117963	136.169
chrX	5086457	5086657	201	-0.0781384	0.750386	0.846134	CG15465	chrX	5086475	5086846	141.247	chrX	5086340	5086673	334	0.3073	0.3951	CG15465	chrX	5086424	5086804	37.869
chr2R	7692937	7693137	201	0.0774526	0.751023	0.846134	LRR	chr2R	7692858	7693214	215.074	chr2R	7692986	7693138	153	0.2879	0.6019	LRR	chr2R	7693069	7693198	41.086
chr3R	3374222	3374422	201	-0.0736928	0.765614	0.856798	NA	chr3R	3374208	3374487	103.969	chr3R	3374210	3374461	252	0.1959	0.6699	NA	chr3R	3374241	3374481	143.301
chrX	18290778	18290978	201	-0.0731615	0.768392	0.859023	FBgn0030911	chrX	18290696	18291125	392.457	chrX	18290767	18290989	223	-0.0386	0.8402	FBgn0030911	chrX	18290742	18291006	96.389
chr2L	8683389	8683589	201	-0.0695068	0.776009	0.86466	CG9289	chr2L	8683442	8683619	358.704	chr2L	8683370	8683600	231	-0.0972	0.8185	CG9289	chr2L	8683408	8683964	441.065
chr2R	17476261	17476461	201	0.0679375	0.784228	0.86971	insb	chr2R	17476079	17476550	1690.37	chr2R	17476187	17476559	373	-0.4741	0.05765	insb	chr2R	17476062	17476516	1084.13
chrX	15498879	15499079	201	-0.0671617	0.786967	0.871669	Gmap	chrX	15498862	15499050	42.1	chrX	15498791	15499145	355	0.4112	0.2264	Gmap	chrX	15498837	15499190	78.332
chr2R	9072033	9072233	201	0.0640618	0.796253	0.878379	ana	chr2R	9072057	9072227	298.275	chr2R	9072030	9072567	538	-0.0614	0.676	ana	chr2R	9072040	9072243	261.56
chr3L	11046607	11046807	201	-0.0620264	0.802435	0.882181	CG43693	chr3L	11046621	11046900	209.793	chr3L	11046548	11046816	269	0.3782	0.2476	CG43693	chr3L	11046517	11046907	94.899
chr2L	9521545	9521745	201	-0.0617799	0.803517	0.882903	Oatp30B	chr2L	9521261	9521848	112.756	chr2L	9521402	9521775	374	0.1134	0.715	Oatp30B	chr2L	9520867	9521729	49.094
chr3R	11340180	11340380	201	0.0554717	0.820187	0.892435	pros	chr3R	11340195	11340405	255.316	chr3R	11340200	11340363	164	0.2254	0.6431	pros	chr3R	11340202	11340404	106.269
chr2L	6536106	6536306	201	-0.0535901	0.826753	0.896709	eya	chr2L	6536127	6536396	76.293	chr2L	6535824	6536404	581	0.308	0.2807	eya	chr2L	6536025	6536487	140.541
chr3L	2808264	2808464	201	-0.0539911	0.827935	0.897543	Tet	chr3L	2808250	2808642	342.226	chr3L	2808172	2808536	365	0.317	0.3408	Tet	chr3L	2808256	2808653	87.353
chr2R	10551892	10552092	201	-0.051239	0.836135	0.902855	NA	chr2R	10551630	10552172	414.077	chr2R	10551807	10552110	304	0.0332	0.9413	NA	chr2R	10551985	10552141	64.957
chrX	8227700	8227900	201	-0.0490831	0.843106	0.907085	sdt	chrX	8227712	8227877	368.551	chrX	8227709	8227913	205	0.2236	0.6439	sdt	chrX	8227669	8227924	184.666
chr2L	6783372	6783572	201	0.0459138	0.849503	0.911138	nrv1	chr2L	6783409	6783567	189.555	chr2L	6783454	6783600	147	0.1025	0.9455	nrv1	chr2L	6783422	6783561	61.363
chr3R	14017761	14017961	201	-0.0386071	0.8754	0.928003	rdx	chr3R	14017687	14018096	1659.81	chr3R	14017608	14018107	500	0.3241	0.5409	rdx	chr3R	14017680	14017988	738.93
chr3R	29841359	29841559	201	0.0377921	0.876955	0.928746	Cad99C	chr3R	29841440	29841602	134.59	chr3R	29841275	29841743	469	0.1722	0.5505	Cad99C	chr3R	29841393	29841776	42.044
chrX	8271378	8271578	201	-0.0360851	0.883982	0.932372	CG1632	chrX	8271242	8271433	60.993	chrX	8271180	8271753	574	-0.2949	0.4498	CG1632	chrX	8271275	8271672	275.777
chr3L	8456479	8456679	201	-0.033873	0.89088	0.93549	Gug	chr3L	8456425	8456669	2205.68	chr3L	8456578	8456822	245	-0.1243	0.7079	Gug	chr3L	8456383	8456700	1518.86
chrX	2634356	2634556	201	-0.0333051	0.891662	0.935873	sgg	chrX	2634430	2634853	146.292	chrX	2634413	2634506	94	0.0561	1	sgg	chrX	2634314	2634852	111.464
chr2L	4853188	4853388	201	-0.0322496	0.89673	0.939317	mRpS2	chr2L	4853235	4853427	956.498	chr2L	4853172	4853364	193	-0.059	0.9334	mRpS2	chr2L	4853196	4853754	856.79
chr2R	9376700	9376900	201	-0.0321215	0.897039	0.939317	CG13954	chr2R	9376707	9376936	303.106	chr2R	9376657	9376918	262	0.3858	0.5133	CG13954	chr2R	9376780	9376921	42.218
chr3R	6903575	6903775	201	-0.0292382	0.905683	0.94383	Antp	chr3R	6903600	6903782	85.786	chr3R	6903574	6903810	237	-0.2883	0.3387	Antp	chr3R	6903484	6903873	183.835
chr2L	377770	377970	201	-0.0255283	0.916957	0.951286	al	chr2L	377863	378040	42.1	chr2L	377771	378188	418	-0.1209	0.7574	al	chr2L	377811	378026	41.511
chrX	7154058	7154258	201	0.024216	0.92161	0.954134	CG9650	chrX	7154038	7154209	243.393	chrX	7154124	7154255	132	0.1215	0.8174	CG9650	chrX	7154021	7154213	201.757
chrX	7044866	7045066	201	0.022612	0.926766	0.956903	CG12541	chrX	7044943	7045109	383.493	chrX	7044856	7044978	123	0.1818	0.6276	CG12541	chrX	7044887	7045142	261.486
chr3R	16025975	16026175	201	0.0225202	0.927717	0.957561	pnr	chr3R	16025774	16026105	199.298	chr3R	16025875	16026231	357	0.3937	0.1305	pnr	chr3R	16025837	16026206	125.895
chrX	18627109	18627309	201	-0.0203768	0.934563	0.96215	wgn	chrX	18627207	18627341	55.015	chrX	18627076	18627375	300	-0.3024	0.5079	wgn	chrX	18627130	18627345	110.637
chr2R	13826628	13826828	201	0.0155564	0.950024	0.971115	fl(2)d	chr2R	13826564	13826915	707.635	chr2R	13826622	13826821	200	0.141	0.7007	fl(2)d	chr2R	13826606	13826855	364.794
chrX	16562358	16562558	201	-0.01286	0.958645	0.975609	Pp2B-14D	chrX	16562276	16562674	967.258	chrX	16562328	16562597	270	0.3167	0.4052	Pp2B-14D	chrX	16562364	16562648	440.425
chr2R	14458286	14458486	201	0.00900059	0.96533	0.979598	Oaz	chr2R	14457991	14458595	260.79	chr2R	14458076	14458578	503	0.3443	0.2522	Oaz	chr2R	14458041	14458581	149.797
chr3L	9813857	9814057	201	0.0101093	0.967011	0.980434	CG43897	chr3L	9813896	9814125	538.589	chr3L	9813863	9814007	145	-0.2341	0.6753	CG43897	chr3L	9813919	9814126	375.887
chr2L	6186484	6186684	201	0.00856385	0.972257	0.983352	smal	chr2L	6186578	6186785	1190.36	chr2L	6186453	6186767	315	0.1917	0.6605	smal	chr2L	6186542	6186788	857.443
chr3R	18924346	18924546	201	-0.00319087	0.989669	0.994026	Xrp1	chr3R	18924379	18924686	389.973	chr3R	18924368	18924562	195	0.4305	0.1076	Xrp1	chr3R	18924494	18924628	65.196
chr3L	14133084	14133284	201	-0.292744	0.238526	1	Sox21b	chr3L	14132978	14133364	263.737	chr3L	14133063	14133257	195	0.2482	0.4453	Sox21b	chr3L	14133073	14133332	68.418
chrX	3949768	3949968	201	-0.254353	0.219712	1	Vap33	chrX	3949884	3950037	50.647	chrX	3949758	3950132	375	0.4586	0.1827	Vap33	chrX	3949930	3950112	41.511
chrX	12083609	12083809	201	-0.210125	0.398652	1	FBgn0264675	chrX	12083648	12083790	65.095	chrX	12083731	12083822	92	-0.0046	1	FBgn0264675	chrX	12083661	12083790	54.422
chr3L	18003267	18003467	201	-0.199208	0.420859	1	Eip75B	chr3L	18003254	18003546	102.958	chr3L	18003279	18003451	173	0.0982	0.9438	Eip75B	chr3L	18003226	18003475	91.962
chr3R	10507311	10507511	201	-0.192406	0.437561	1	NA	chr3R	10507441	10507626	207.178	chr3R	10507257	10507510	254	0.0932	0.722	NA	chr3R	10507437	10507629	191.506
chrX	19907092	19907292	201	-0.183554	0.4607	1	Hers	chrX	19907140	19907486	146.309	chrX	19907095	19907271	177	0.4532	0.2109	Hers	chrX	19907151	19907485	79.833
chrX	4545016	4545216	201	-0.180361	0.464977	1	Usf	chrX	4545122	4545292	195.175	chrX	4545058	4545192	135	0.1376	0.6831	Usf	chrX	4545126	4545294	116.476
chrX	16146885	16147085	201	-0.0675357	0.785814	1	disco-r	chrX	16146909	16147103	869.786	chrX	16146887	16147049	163	0.4662	0.2669	disco-r	chrX	16146886	16147137	434.666
chr3R	24710254	24710454	201	-0.0409565	0.868116	1	slo	chr3R	24710317	24710455	67.813	chr3R	24710308	24710390	83	0.1206	0.9088	slo	chr3R	24710323	24710454	56.808
chrX	21060682	21060882	201	-0.0359637	0.88484	1	bves	chrX	21060711	21060861	90.702	chrX	21060670	21061019	350	0.425	0.3111	bves	chrX	21060692	21060889	37.869
chrX	18585206	18585406	201	-0.0297104	0.904778	1	NA	chrX	18585131	18585505	256.253	chrX	18585046	18585434	389	0.4328	0.3146	NA	chrX	18585132	18585507	116.356
chr2R	13342906	13343106	201	0.0506654	0.7978	1	FBgn0265104	chr2R	13342929	13343079	160.845	chr2R	13342604	13343111	508	0.2654	0.5669	FBgn0265104	chr2R	13342723	13343087	126.746
chr2L	7166739	7166939	201	0.053976	0.827811	1	NA	chr2L	7166724	7166917	308.368	chr2L	7166809	7166914	106	-0.1552	0.8858	NA	chr2L	7166779	7166908	65.196
chrX	6890102	6890302	201	0.183861	0.459943	1	NA	chrX	6890102	6890555	604.891	chrX	6890221	6890412	192	0.3081	0.7618	NA	chrX	6890122	6890549	290.991
chr3R	28377450	28377650	201	0.186176	0.445189	1	NA	chr3R	28377498	28377663	341.546	chr3R	28377449	28377615	167	-0.0221	1	NA	chr3R	28377475	28377658	276.407
chrX	3332658	3332858	201	0.427667	0.0860493	1	dnc	chrX	3332713	3332909	323.353	chrX	3332704	3332834	131	0.2096	0.803	dnc	chrX	3332757	3332891	42.073

## Sheet: DA w CLAMP
ATAC-seq (MTD vs. clamp-i DA)								ChIP-seq (CLAMP)
Chromosome	ChromStart	ChromEnd	ATACpeakSize	FC	p.value	FDR	GeneName	Chromosome	ChromStart	ChromEnd	PeakScore	OverlapReagion
chr3R	17666054	17666254	201	-1.33343	1.86067e-07	0.000708961	CG14322	chr3R	17666001	17666754	116.08	200
chr4	989504	989704	201	-1.27897	3.7732e-07	0.000958457	toy	chr4	989402	989780	533.105	200
chr3R	14373540	14373740	201	-1.25712	6.32171e-07	0.00137642	NK7.1	chr3R	14373498	14373820	216.872	200
chr2L	4045263	4045463	201	-1.19705	2.40476e-06	0.00390478	ed	chr2L	4045134	4045513	182.561	200
chrX	5560563	5560763	201	-1.20063	2.63782e-06	0.00390478	Vsx2	chrX	5560469	5561118	502.09	200
chrX	13739621	13739821	201	-1.18005	4.2391e-06	0.00430721	Grip91	chrX	13739499	13739899	342.653	200
chrX	1399727	1399927	201	-1.16062	5.87235e-06	0.00546715	NA	chrX	1399636	1400039	415.12	200
chr2R	23236967	23237167	201	-1.14729	7.57924e-06	0.00582331	NA	chr2R	23236917	23237132	68.625	165
chr3R	24630083	24630283	201	-1.13569	8.16833e-06	0.00582331	atl	chr3R	24630036	24630326	184.89	200
chr3L	14599599	14599799	201	-1.10758	1.11261e-05	0.00644771	HGTX	chr3L	14599569	14600009	214.895	200
chr3R	9808989	9809189	201	-1.10785	1.24447e-05	0.00677389	FBXO11	chr3R	9808768	9809426	299.958	200
chr3L	14131742	14131942	201	-1.10041	1.52008e-05	0.00747342	Sox21b	chr3L	14131564	14132045	889.25	200
chr2L	3611892	3612092	201	-1.07438	1.65933e-05	0.00790308	NA	chr2L	3611854	3612140	79.356	200
chr3L	19791798	19791998	201	-1.08173	1.71993e-05	0.00794345	SREBP	chr3L	19791572	19792055	103.58	200
chr3L	5770925	5771125	201	-1.0797	1.96771e-05	0.00882056	Ppat-Dpck	chr3L	5770763	5771139	249.586	200
chr3L	21011068	21011268	201	-1.05828	2.83415e-05	0.0107988	skd	chr3L	21011053	21011309	99.695	200
chr3L	14463616	14463816	201	-1.06233	2.93324e-05	0.0109038	bbg	chr3L	14463541	14463792	216.622	176
chrX	2796445	2796645	201	-1.05642	3.05917e-05	0.0111012	FBgn0003996	chrX	2796408	2796685	128.896	200
chr2L	19154905	19155105	201	-1.06038	3.25267e-05	0.0112668	brat	chr2L	19154806	19155329	276.025	200
chr3R	4835387	4835587	201	-1.05245	3.58982e-05	0.0121583	NA	chr3R	4835325	4835670	508.622	200
chr3R	20829177	20829377	201	-1.02938	5.35234e-05	0.0169948	FBgn0027493	chr3R	20829183	20829338	53.664	155
chr3L	10850129	10850329	201	-1.00515	6.20162e-05	0.0192896	tna	chr3L	10849773	10850200	171.561	71
chr3R	8140053	8140253	201	-0.999673	7.16348e-05	0.0209959	FBgn0011959	chr3R	8140221	8140358	55.087	32
chr3R	21499255	21499455	201	-0.990935	9.49638e-05	0.0251504	C15	chr3R	21499443	21499926	258.573	12
chr2L	18150068	18150268	201	-0.983286	9.51493e-05	0.0251504	CG17681	chr2L	18150006	18150259	50.647	191
chr3L	432635	432835	201	-0.977853	0.000103722	0.0251504	NA	chr3L	432570	432901	352.009	200
chr3L	539527	539727	201	-0.97092	0.000105612	0.0251504	klar	chr3L	539436	539747	50.647	200
chrX	11817270	11817470	201	-0.982911	0.000112411	0.0261837	CG1578	chrX	11817255	11817522	105.076	200
chr3R	16923631	16923831	201	-0.958836	0.000118481	0.0261837	FBgn0264857	chr3R	16923572	16923931	151.358	200
chr3R	14722301	14722501	201	-0.965953	0.000135607	0.0275571	kibra	chr3R	14722249	14722477	86.142	176
chr3R	16403743	16403943	201	-0.952175	0.000150688	0.0283792	ss	chr3R	16403482	16404083	251.281	200
chr3L	12609451	12609651	201	-0.953393	0.000157427	0.0288612	caup	chr3L	12609215	12609822	1038.72	200
chr2L	13666004	13666204	201	-0.947989	0.000169277	0.0298587	CG18507	chr2L	13666120	13666262	41.744	84
chrX	9466572	9466772	201	-0.958362	0.000170442	0.0298587	mgl	chrX	9466548	9466978	160.241	200
chrX	4425080	4425280	201	-0.955293	0.000178222	0.0308668	bi	chrX	4424827	4425459	468.311	200
chr2L	18936178	18936378	201	-0.940169	0.000182463	0.0311006	ssp3	chr2L	18936112	18936483	419.476	200
chr3L	14153090	14153290	201	-0.940618	0.0001859	0.0311351	NA	chr3L	14153081	14153274	105.533	184
chr2R	20541632	20541832	201	-0.928672	0.000232722	0.036947	CG13427	chr2R	20541608	20541881	141.617	200
chr3R	23195853	23196053	201	-0.923918	0.000259808	0.0392053	cnc	chr3R	23195896	23196040	38.555	144
chrX	6855697	6855897	201	-0.928854	0.000265565	0.0392959	CG14434	chrX	6855481	6856030	451.187	200
chrX	19546689	19546889	201	-0.918138	0.000307533	0.0418493	CG32532	chrX	19545889	19547202	1080.86	200
chr3R	18424473	18424673	201	-0.90485	0.000363923	0.0475387	fru	chr3R	18424493	18424672	58.785	179
chr3L	14003599	14003799	201	-0.883683	0.000398291	0.0493525	Nprl3	chr3L	14003632	14003818	38.555	167
chr2R	11475147	11475347	201	-0.89404	0.000407119	0.0494112	inv	chr2R	11475141	11475816	688.266	200
chr2R	7300768	7300968	201	-0.890767	0.000413812	0.0496607	pwn	chr2R	7300760	7301004	181.199	200
chrX	11816784	11816984	201	-0.882795	0.000435006	0.0515812	CG1578	chrX	11816791	11817042	80.453	193
chr3L	10849839	10850039	201	-0.890518	0.000439826	0.0515812	tna	chr3L	10849773	10850200	171.561	200
chrX	10802183	10802383	201	-0.873594	0.000547056	0.0589989	Imp	chrX	10802204	10802376	41.545	172
chr3L	15315503	15315703	201	-0.873425	0.000585599	0.059603	NA	chr3L	15315512	15315759	115.289	191
chr2R	9692626	9692826	201	-0.873052	0.000595221	0.0600779	Uba1	chr2R	9692434	9693288	241.526	200
chr2L	22024538	22024738	201	-0.86681	0.00061481	0.060522	tio	chr2L	22024393	22024841	440.84	200
chr2L	4055860	4056060	201	-0.86122	0.000660632	0.061927	ed	chr2L	4055895	4056043	48.172	148
chr2R	24814631	24814831	201	-0.860482	0.000666362	0.061927	Dll	chr2R	24814430	24814848	298.115	200
chr2L	5742	5942	201	-0.831877	0.000713401	0.0639873	FBgn0031208	chr2L	5494	5947	127.998	200
chr3R	16847302	16847502	201	-0.851601	0.000713827	0.0639873	FBgn0020546	chr3R	16847252	16847574	360.186	200
chr2R	10543339	10543539	201	-0.84718	0.000789117	0.0681971	lola	chr2R	10543340	10543616	80.673	199
chrX	6866171	6866371	201	-0.849136	0.000792002	0.0681971	CG14434	chrX	6866106	6866379	83.422	200
chr2R	13992399	13992599	201	-0.850302	0.000811981	0.0691126	mam	chr2R	13992373	13992660	208.769	200
chr2R	15892134	15892334	201	-0.829894	0.000980169	0.0754483	sli	chr2R	15892120	15892296	73.202	162
chr3L	8458843	8459043	201	-0.832608	0.00101983	0.076768	Gug	chr3L	8458956	8459093	42.1	87
chr3R	31739125	31739325	201	-0.820173	0.0010525	0.076768	eEF1alpha2	chr3R	31739149	31739383	120.884	176
chr3L	14298166	14298366	201	-0.811701	0.00128848	0.0840865	fz	chr3L	14298163	14298460	168.424	200
chrX	12615824	12616024	201	-0.80476	0.00140594	0.0885453	CG11085	chrX	12615820	12616332	155.283	200
chrX	5593965	5594165	201	-0.806312	0.00148033	0.0913429	Vsx1	chrX	5593865	5594344	255.82	200
chr2R	14504093	14504293	201	-0.799488	0.00151213	0.0923356	Cpsf160	chr2R	14503888	14504563	160.606	200
chr2R	19266193	19266393	201	-0.798011	0.00156065	0.0923356	NA	chr2R	19266102	19266464	156.951	200
chr2R	18538023	18538223	201	-0.792261	0.00165931	0.0948731	Pepck1	chr2R	18538002	18538130	41.744	107
chr3R	5021578	5021778	201	-0.79518	0.00169791	0.0957635	NA	chr3R	5021610	5021872	39.907	168
chr2R	20831846	20832046	201	-0.789634	0.00175482	0.0972551	insc	chr2R	20831799	20832166	184.725	200
chr3R	16886591	16886791	201	-0.784651	0.00178068	0.0979759	FBgn0264857	chr3R	16886511	16886806	274.138	200
chr2R	13621313	13621513	201	-0.790108	0.00181794	0.0989545	CG17716	chr2R	13621254	13621600	409.01	200
chrX	18930996	18931196	201	-0.784374	0.00191629	0.0997611	CG43759	chrX	18930945	18931167	76.81	171
chrX	17508465	17508665	201	-0.786518	0.00191864	0.0997611	CG43658	chrX	17508463	17508742	38.555	200
chr3R	29083960	29084160	201	-0.775497	0.00193095	0.0997611	CG11873	chr3R	29084017	29084168	41.545	143

## Sheet: DA wo CLAMP
ATAC-seq (MTD vs. clamp-i DA)
Chromosome	ChromStart	ChromEnd	ATACpeakSize	FC	p.value	FDR	GeneName
chr2R	13562439	13562639	201	-1.36798	9.94858e-08	0.000505421	NA
chr2R	15739374	15739574	201	-1.32192	2.47844e-07	0.000755478	CG30089
chr2R	8866359	8866559	201	-1.25937	9.08667e-07	0.00173112	RyR
chr2R	11795983	11796183	201	-1.19141	2.81822e-06	0.00390478	ths
chr3L	12433885	12434085	201	-1.17245	3.61954e-06	0.00394039	toe
chr2L	12616048	12616248	201	-1.12192	7.84002e-06	0.00582331	Ref2
chr2L	20165932	20166132	201	-1.14294	8.11969e-06	0.00582331	NA
chrX	12633968	12634168	201	-1.13325	8.65771e-06	0.00582331	Tomosyn
chr3L	26467038	26467238	201	-1.10907	9.75724e-06	0.00619625	NA
chr3R	14370187	14370387	201	-1.10838	1.14224e-05	0.00644771	NK7.1
chr3L	26470409	26470609	201	-1.09453	1.48676e-05	0.00747342	NA
chr3L	732484	732684	201	-1.08809	2.07813e-05	0.00893873	NA
chr2R	13585074	13585274	201	-1.08818	2.11137e-05	0.00893873	CG6191
chr3L	9442766	9442966	201	-1.06441	2.73265e-05	0.0107988	Nf-YA
chr2L	19156935	19157135	201	-1.0441	2.77627e-05	0.0107988	brat
chr3L	15141775	15141975	201	-1.05968	2.78935e-05	0.0107988	Pex3
chr3R	16864901	16865101	201	-1.04789	3.21448e-05	0.0112668	FBgn0264857
chr2R	25255757	25255957	201	-1.02285	4.54312e-05	0.0150525	CG9380
chr3L	8481233	8481433	201	-1.00537	5.18771e-05	0.0168225	CG43163
chr3R	21641832	21642032	201	-1.01788	6.53776e-05	0.0199284	E2f1
chr3R	9440442	9440642	201	-1.0147	6.9645e-05	0.0208129	ps
chr3R	7087063	7087263	201	-0.994229	7.42126e-05	0.021341	alphaTub84B
chr2R	25255215	25255415	201	-0.996362	7.79877e-05	0.0220113	CG9380
chr3R	10111308	10111508	201	-0.981937	9.67681e-05	0.0251504	Fmr1
chr3L	4108097	4108297	201	-0.971889	0.000102606	0.0251504	Ack
chr2R	25225333	25225533	201	-0.976533	0.000103219	0.0251504	Kr
chrX	18794807	18795007	201	-0.982163	0.000103661	0.0251504	bnb
chrX	19773435	19773635	201	-0.979921	0.000105128	0.0251504	zld
chr3R	18072259	18072459	201	-0.984331	0.000114302	0.0261837	NA
chr3L	15142061	15142261	201	-0.975492	0.000118443	0.0261837	Pex3
chr2L	13241810	13242010	201	-0.962394	0.000118631	0.0261837	FBgn0003935
chr2L	19816719	19816919	201	-0.958043	0.000120258	0.0261837	FBgn0003922
chr2L	19811775	19811975	201	-0.968882	0.000127612	0.0268089	FBgn0003923
chr2R	14621921	14622121	201	-0.960197	0.000128586	0.0268089	CG12863
chr3L	886478	886678	201	-0.957114	0.000138046	0.0276837	Usp10
chr3L	3148526	3148726	201	-0.957501	0.000146062	0.0283792	Usp5
chr3R	16902118	16902318	201	-0.956458	0.000146954	0.0283792	FBgn0264857
chr3R	21496765	21496965	201	-0.964185	0.000150824	0.0283792	NA
chr3L	20281390	20281590	201	-0.950288	0.000154939	0.028798	gogo
chr4	572042	572242	201	-0.961767	0.000159067	0.0288612	ND-49
chr2R	19659271	19659471	201	-0.938462	0.000168232	0.0298587	CG15125
chr2R	19659886	19660086	201	-0.923164	0.000213492	0.0347787	CG11018
chr3R	16829254	16829454	201	-0.928254	0.000213521	0.0347787	abd-A
chr3L	9473076	9473276	201	-0.935137	0.0002145	0.0347787	CG44838
chr2L	17266813	17267013	201	-0.923754	0.000218716	0.0350889	NA
chr2L	5473982	5474182	201	-0.924616	0.000243974	0.0383342	NA
chr3L	24060773	24060973	201	-0.914292	0.000249766	0.0388438	NA
chr2R	6199782	6199982	201	-0.924716	0.000252427	0.038861	eIF3f2
chr2L	4366752	4366952	201	-0.919187	0.000257569	0.0392053	Traf4
chr2L	11071577	11071777	201	-0.925546	0.000264181	0.0392959	CG14915
chr2L	3615195	3615395	201	-0.906832	0.000275655	0.0403967	FBgn0265369
chr2R	24045326	24045526	201	-0.913554	0.000287878	0.0413171	sei
chrX	9650406	9650606	201	-0.923251	0.000288404	0.0413171	Ptpmeg2
chr3L	19176817	19177017	201	-0.922686	0.000290381	0.0413171	fz2
chr3L	3072800	3073000	201	-0.905928	0.000292779	0.0413171	PAN3
chr2R	17803345	17803545	201	-0.892876	0.000304751	0.0418493	grh
chr3R	18403158	18403358	201	-0.915022	0.000305118	0.0418493	Wdr37
chr3L	17644395	17644595	201	-0.895491	0.000307478	0.0418493	Pep
chr3R	31062412	31062612	201	-0.91733	0.00031467	0.0424414	dco
chrX	654220	654420	201	-0.906374	0.000341332	0.0456337	SkpA
chr3R	31527910	31528110	201	-0.890858	0.00035865	0.047532	NA
chr3L	19897999	19898199	201	-0.891456	0.000364939	0.0475387	Su(Tpl)
chr3L	10848839	10849039	201	-0.895751	0.000378796	0.0483533	tna
chr2R	24874845	24875045	201	-0.892447	0.000378906	0.0483533	CG16896
chr2R	5370922	5371122	201	-0.885804	0.00038071	0.0483533	NA
chr2R	10813359	10813559	201	-0.88564	0.000394626	0.0493525	CG7637
chr3L	6981451	6981651	201	-0.899186	0.000397975	0.0493525	Galphai
chr3R	18677447	18677647	201	-0.891373	0.000405257	0.0494112	CG7706
chr2R	19143943	19144143	201	-0.897693	0.000408491	0.0494112	ena
chr3L	10847486	10847686	201	-0.889119	0.000439968	0.0515812	tna
chr3L	11238121	11238321	201	-0.877757	0.000443771	0.0516299	Ir68a
chr4	44782	44982	201	-0.884925	0.000467693	0.0528423	PlexB
chr3R	17083782	17083982	201	-0.871942	0.00046886	0.0528423	kuk
chrX	13384788	13384988	201	-0.887813	0.000469309	0.0528423	Rbp1-like
chr2L	10388564	10388764	201	-0.859086	0.000471528	0.0528423	Cdk1
chr3R	30568428	30568628	201	-0.871091	0.000478748	0.0532598	tmod
chr3R	7533695	7533895	201	-0.881934	0.00049849	0.0550543	alpha-Est5
chr3L	22065999	22066199	201	-0.872978	0.000507343	0.0556289	CG14561
chr4	664295	664495	201	-0.863301	0.00051296	0.055843	Slip1
chr4	646502	646702	201	-0.873705	0.000549691	0.0589989	Ekar
chr2L	4060770	4060970	201	-0.864677	0.000564499	0.0593571	ed
chr3L	16631700	16631900	201	-0.854281	0.000566307	0.0593571	Abl
chr2R	24665207	24665407	201	-0.865935	0.000568594	0.0593571	ND-19
chr2R	24062961	24063161	201	-0.865007	0.000568907	0.0593571	RpL39
chr3R	29794346	29794546	201	-0.873753	0.000572501	0.0593571	sro
chr3L	2456713	2456913	201	-0.8703	0.000583358	0.059603	Svil
chr4	359371	359571	201	-0.869716	0.000586605	0.059603	Hcf
chr3L	18016629	18016829	201	-0.871578	0.000603233	0.060486	Eip75B
chr2R	6373257	6373457	201	-0.870582	0.000607377	0.0605035	NA
chr2L	10231307	10231507	201	-0.852832	0.000620492	0.060522	ova
chr3L	16773798	16773998	201	-0.855614	0.00062397	0.060522	Nrt
chr3L	21047234	21047434	201	-0.869	0.000625054	0.060522	siz
chr3L	21175456	21175656	201	-0.86025	0.000627418	0.060522	chb
chr2L	6612409	6612609	201	-0.858796	0.000654424	0.061927	CG11050
chr3L	206014	206214	201	-0.860321	0.00065474	0.061927	Gk1
chr3R	16915655	16915855	201	-0.857125	0.000659957	0.061927	FBgn0264857
chr3R	18558992	18559192	201	-0.852869	0.000663619	0.061927	CG7691
chr2L	8127529	8127729	201	-0.863007	0.000673095	0.0621736	CG12375
chr2R	4615423	4615623	201	-0.860861	0.000684707	0.0628652	NA
chr4	75445	75645	201	-0.848847	0.000692134	0.0631665	pan
chr2R	24277152	24277352	201	-0.852865	0.000717921	0.0639873	nvy
chr3R	27931443	27931643	201	-0.851521	0.000729066	0.0645715	mino
chr3R	16892193	16892393	201	-0.85067	0.000732949	0.0645715	FBgn0263595
chr3R	6762248	6762448	201	-0.853664	0.000755608	0.0661852	Ama
chr3R	2180074	2180274	201	-0.840747	0.000782154	0.0681189	Myo81F
chr3R	23263863	23264063	201	-0.844814	0.00080195	0.0686659	orb
chr2R	17027075	17027275	201	-0.849776	0.000816684	0.0691126	RhoGEF2
chr2L	4071427	4071627	201	-0.84471	0.000826344	0.0691126	ed
chr3R	8840526	8840726	201	-0.827912	0.000829841	0.0691126	pyd
chr2L	519111	519311	201	-0.842482	0.000836066	0.0692527	ush
chr3R	30569330	30569530	201	-0.836077	0.000855567	0.0701059	tmod
chr3R	6857704	6857904	201	-0.825802	0.000886831	0.0722791	NA
chr2L	15017284	15017484	201	-0.831029	0.00090399	0.0732427	GABA-B-R1
chr3R	12128141	12128341	201	-0.819055	0.000908703	0.0732427	CG4702
chr2L	7048897	7049097	201	-0.823986	0.000913071	0.0732427	milt
chr3R	5669824	5670024	201	-0.82075	0.000925228	0.0738293	Xe7
chr3R	13381724	13381924	201	-0.829339	0.000934275	0.0741629	CG9813
chr3L	5771243	5771443	201	-0.83418	0.000949609	0.0748866	Ppat-Dpck
chr2R	24891917	24892117	201	-0.835302	0.000953219	0.0748866	Ance-5
chr2R	10809313	10809513	201	-0.820729	0.000958758	0.0749355	wde
chr4	1030845	1031045	201	-0.83174	0.00096567	0.0750907	ATPsynbeta
chr3R	10161271	10161471	201	-0.832756	0.0010028	0.0766927	CG6254
chr3R	22727516	22727716	201	-0.825805	0.0010064	0.0766927	Irp-1A
chr3L	17378985	17379185	201	-0.824854	0.00102897	0.076768	Cad74A
chrX	3704215	3704415	201	-0.832611	0.00103066	0.076768	NA
chr3R	29073215	29073415	201	-0.826362	0.00103121	0.076768	CG11873
chr2L	4030333	4030533	201	-0.827228	0.00103489	0.076768	ed
chr3R	16878580	16878780	201	-0.822213	0.00104469	0.076768	FBgn0264857
chr4	959852	960052	201	-0.810009	0.00105409	0.076768	4E-T
chr2L	18616109	18616309	201	-0.827362	0.00105693	0.076768	IFT46
chr4	942066	942266	201	-0.816789	0.00105776	0.076768	mGluR
chrX	8057134	8057334	201	-0.829827	0.00107098	0.077359	fs(1)h
chr3R	6859026	6859226	201	-0.823126	0.00107775	0.0774811	FBgn0267560
chr2R	13569402	13569602	201	-0.822944	0.00110917	0.0793652	NA
chr3L	54073	54273	201	-0.811475	0.001126	0.0798595	CG43149
chr2L	16276899	16277099	201	-0.815275	0.00113051	0.0798595	crp
chr3R	23886135	23886335	201	-0.809869	0.00113179	0.0798595	Pli
chrX	11681852	11682052	201	-0.824093	0.0011587	0.0813742	bif
chr3R	4640196	4640396	201	-0.823152	0.00116858	0.0813742	CG9775
chr3R	17822203	17822403	201	-0.802809	0.00117126	0.0813742	tinc
chr3L	22879238	22879438	201	-0.807142	0.00117952	0.0813742	Ssl1
chr3R	6864552	6864752	201	-0.80683	0.00118109	0.0813742	ftz
chr3R	16941865	16942065	201	-0.811222	0.0011853	0.0813742	Abd-B
chr3R	2185195	2185395	201	-0.819987	0.00120112	0.0820906	Myo81F
chr3R	13023684	13023884	201	-0.81532	0.00122101	0.0826748	CtBP
chr3L	14185128	14185328	201	-0.812404	0.0012229	0.0826748	NA
chr4	788421	788621	201	-0.808815	0.00122594	0.0826748	MED26
chr3L	19165132	19165332	201	-0.819768	0.00123404	0.0828545	fz2
chr3R	26888187	26888387	201	-0.804051	0.00125933	0.0828654	T48
chr3R	21359450	21359650	201	-0.798704	0.0012601	0.0828654	mod(mdg4)
chr2L	19155890	19156090	201	-0.796708	0.00126096	0.0828654	brat
chr3R	10849683	10849883	201	-0.816845	0.00126121	0.0828654	CG4565
chr3L	14155160	14155360	201	-0.796083	0.00126139	0.0828654	NA
chr3R	24530538	24530738	201	-0.806396	0.00129101	0.0840865	CG13623
chr3L	15826066	15826266	201	-0.807712	0.00134414	0.0871746	DCP2
chr2R	24047261	24047461	201	-0.790594	0.0013658	0.0875286	sei
chr2L	518415	518615	201	-0.800063	0.00136607	0.0875286	ush
chr3L	14600692	14600892	201	-0.809703	0.00136683	0.0875286	HGTX
chr3R	8116484	8116684	201	-0.798501	0.00137544	0.0875402	puc
chr2R	18306008	18306208	201	-0.801646	0.0013785	0.0875402	CG14505
chr2L	7532555	7532755	201	-0.809055	0.00138704	0.0877175	RapGAP1
chr3L	22074344	22074544	201	-0.800236	0.00141512	0.0887566	RpLP0
chr3L	20694209	20694409	201	-0.792284	0.0014356	0.0896723	kni
chr3L	5770199	5770399	201	-0.802117	0.00144649	0.0899835	Ppat-Dpck
chr3R	8108873	8109073	201	-0.795838	0.00145337	0.0900438	puc
chr3R	14316135	14316335	201	-0.796092	0.00150073	0.0922282	PR-Set7
chr2R	16110950	16111150	201	-0.804114	0.0015244	0.0923356	Asph
chr3L	12566311	12566511	201	-0.787141	0.00152852	0.0923356	sowah
chr3R	30762275	30762475	201	-0.797863	0.00153143	0.0923356	NA
chr3L	20711544	20711744	201	-0.781308	0.00155469	0.0923356	CG34260
chr2L	3078786	3078986	201	-0.788791	0.00156531	0.0923356	toc
chr2L	10250397	10250597	201	-0.796883	0.00157587	0.0923356	bsk
chr3L	21149241	21149441	201	-0.781639	0.00157969	0.0923356	Ac78C
chr3L	1342076	1342276	201	-0.798133	0.00158121	0.0923356	CG2199
chr4	1061339	1061539	201	-0.784398	0.00158276	0.0923356	Zyx
chr3L	1639120	1639320	201	-0.79824	0.00158371	0.0923356	nSyb
chr3L	18743805	18744005	201	-0.796395	0.00158729	0.0923356	CG6885
chr2R	20560347	20560547	201	-0.7932	0.00160353	0.0929255	Mgat1
chrX	10808601	10808801	201	-0.790121	0.00165511	0.0948731	Imp
chr3L	9455527	9455727	201	-0.773601	0.00165617	0.0948731	phol
chr2R	9540158	9540358	201	-0.790745	0.00166204	0.0948731	brp
chr3R	18078518	18078718	201	-0.782608	0.00167909	0.095489	CG14317
chr3L	319203	319403	201	-0.790614	0.00168581	0.0955146	fwd
chr3R	22639012	22639212	201	-0.793798	0.00170277	0.0957635	loco
chr2R	18553854	18554054	201	-0.793978	0.00174179	0.0972551	NA
chr3R	8700962	8701162	201	-0.775331	0.00175306	0.0972551	NA
chr4	167766	167966	201	-0.789873	0.00175424	0.0972551	CG33978
chr3R	4833739	4833939	201	-0.787798	0.00176979	0.0977298	CG14659
chr3R	15654006	15654206	201	-0.785552	0.00179056	0.0981424	NA
chrX	636548	636748	201	-0.778868	0.00179658	0.0981424	su(sable)
chr3L	4017384	4017584	201	-0.779939	0.00184532	0.0997611	FoxL1
chr3L	4548932	4549132	201	-0.784544	0.0018584	0.0997611	CG11357
chr3R	24229813	24230013	201	-0.762674	0.0018717	0.0997611	Acp95EF
chr3R	9258869	9259069	201	-0.782175	0.00188627	0.0997611	CG16736
chr2R	17870589	17870789	201	-0.770711	0.00189037	0.0997611	Mapmodulin
chr3L	3071280	3071480	201	-0.780081	0.0019033	0.0997611	PAN3
chr3R	21022991	21023191	201	-0.786968	0.00190634	0.0997611	CG17278
chr2L	1402345	1402545	201	-0.766353	0.001913	0.0997611	robo2
chrX	11600765	11600965	201	-0.780215	0.00192002	0.0997611	rho-4
chr3R	16468677	16468877	201	-0.780487	0.00192253	0.0997611	CSN5
chr4	1181594	1181794	201	-0.774755	0.00192491	0.0997611	pho
chr3L	18748249	18748449	201	-0.769461	0.00192976	0.0997611	Nufip
chr3R	17775445	17775645	201	-0.766477	0.001944	0.099951	CG43102

## Sheet: nonDA w CLAMP 
ATAC-seq (MTD vs. clamp-i non-DA)								ChIP-seq (CLAMP)
Chromosome	ChromStart	ChromEnd	ATACpeakSize	FC	p.value	FDR	GeneName	Chromosome	ChromStart	ChromEnd	PeakScore	OverlapReagion
chr3L	3785638	3785838	201	-0.496804	0.044478	0.256115	CG32264	chr3L	3785271	3785762	96.164	124
chr2R	15756572	15756772	201	-0.499454	0.0448094	0.256507	CG30089	chr2R	15756627	15756788	184.511	145
chr3R	29458055	29458255	201	-0.496331	0.0460117	0.258483	Ptp99A	chr3R	29458079	29458345	99.703	176
chr3L	3070722	3070922	201	-0.496318	0.0464061	0.259325	PAN3	chr3L	3070560	3071087	130.393	200
chr2L	4031224	4031424	201	-0.497735	0.0471112	0.260436	ed	chr2L	4031325	4032028	321.089	99
chr3L	21025172	21025372	201	-0.497361	0.0474554	0.26105	skd	chr3L	21025262	21025422	40.695	110
chr3R	6997023	6997223	201	-0.496883	0.0476201	0.261064	Antp	chr3R	6997042	6997259	87.018	181
chrX	8410452	8410652	201	-0.495891	0.047912	0.261437	Trf2	chrX	8410318	8410771	475.95	200
chr3R	29618612	29618812	201	-0.494291	0.0481255	0.261584	CG1907	chr3R	29618798	29619086	97.366	14
chr2R	10596223	10596423	201	-0.485721	0.0484437	0.262191	psq	chr2R	10596297	10596721	94.45	126
chr2R	20770976	20771176	201	-0.493373	0.0485648	0.262267	CG13443	chr2R	20771065	20771473	147.406	111
chr3L	1861460	1861660	201	-0.491066	0.0488039	0.262395	Rap1	chr3L	1861356	1861788	108.079	200
chr2L	6939809	6940009	201	-0.490981	0.0488486	0.262467	CG18304	chr2L	6939717	6940108	267.681	200
chr3L	20241185	20241385	201	-0.487818	0.0488633	0.262467	Clc	chr3L	20241240	20241379	53.001	139
chr2R	10002520	10002720	201	0.480126	0.0491183	0.262905	Pka-R2	chr2R	10002578	10002797	1462.66	142
chr3L	4626083	4626283	201	-0.492415	0.0491793	0.262905	HDAC1	chr3L	4625681	4626340	430.866	200
chr2L	19161309	19161509	201	-0.49164	0.0494432	0.263116	brat	chr2L	19161354	19161672	90.559	155
chr3L	3374108	3374308	201	-0.485601	0.0497428	0.263396	Ythdc1	chr3L	3374153	3374321	102.25	155
chrX	7324784	7324984	201	-0.491229	0.0502334	0.264327	CG1677	chrX	7324763	7324957	38.555	173
chrX	2158005	2158205	201	-0.489307	0.0511176	0.265499	wapl	chrX	2158055	2158458	86.873	150
chrX	17738649	17738849	201	-0.488016	0.0513284	0.265641	raskol	chrX	17738718	17739337	326.081	131
chr3L	8315352	8315552	201	-0.480351	0.0514212	0.265641	Cpsf6	chr3L	8315107	8315421	108.406	69
chr3R	21419602	21419802	201	-0.483282	0.0518517	0.266894	lbl	chr3R	21419524	21419820	59.974	200
chrX	8757868	8758068	201	-0.487288	0.052034	0.267114	Lim1	chrX	8757504	8758204	351.041	200
chr3R	22781514	22781714	201	-0.485319	0.0522746	0.267383	CG7029	chr3R	22781594	22781726	39.907	120
chr3R	9229570	9229770	201	-0.485589	0.0526973	0.267809	pum	chr3R	9229596	9229777	54.332	174
chrX	9354610	9354810	201	-0.485514	0.0528342	0.26788	BCL7-like	chrX	9354736	9355052	105.076	74
chr2R	17679245	17679445	201	-0.483171	0.0528997	0.268034	Sema1b	chr2R	17679250	17679418	60.764	168
chrX	14200047	14200247	201	-0.484522	0.0530563	0.268381	l(1)G0007	chrX	14199958	14200116	180.616	69
chr4	704423	704623	201	-0.478643	0.0532285	0.268547	ey	chr4	704339	704688	135.473	200
chrX	9686672	9686872	201	-0.484835	0.0532301	0.268547	FBgn0261522	chrX	9686368	9686851	152.32	179
chr2L	13296213	13296413	201	-0.478522	0.0539414	0.269925	CG31729	chr2L	13296220	13296470	63.433	193
chr3R	16948628	16948828	201	-0.482473	0.0539696	0.269925	Abd-B	chr3R	16948539	16949085	455.002	200
chr2R	11182768	11182968	201	-0.469735	0.0539792	0.269925	shn	chr2R	11182757	11183070	66.562	200
chr3R	4852501	4852701	201	-0.481034	0.0541489	0.269993	opa	chr3R	4852302	4852811	440.663	200
chrX	6534188	6534388	201	-0.480965	0.0542186	0.270047	dx	chrX	6534159	6534434	151.586	200
chr3R	10535850	10536050	201	-0.482538	0.0542865	0.270209	hth	chr3R	10535794	10536095	387.779	200
chr2L	4028866	4029066	201	-0.481261	0.0543672	0.270522	ed	chr2L	4028580	4029171	152.546	200
chr3R	19156743	19156943	201	-0.481892	0.0544497	0.270698	nos	chr3R	19156799	19156960	105.401	144
chr2L	3539545	3539745	201	-0.481039	0.0546181	0.270747	drm	chr2L	3539327	3539748	238.062	200
chr3R	24590378	24590578	201	-0.481047	0.0551047	0.271152	mld	chr3R	24590440	24590589	158.227	138
chr3R	25647984	25648184	201	-0.480145	0.0551293	0.271152	jigr1	chr3R	25648036	25648222	44.506	148
chr3R	17080130	17080330	201	-0.471108	0.0556785	0.271931	Keap1	chr3R	17080140	17080304	39.907	164
chr3R	15794412	15794612	201	-0.478572	0.0559333	0.271931	c(3)G	chr3R	15794267	15794587	73.619	175
chr3R	16661810	16662010	201	-0.469653	0.0559706	0.271931	Ubx	chr3R	16661732	16661977	87.337	167
chr3L	1464638	1464838	201	-0.469424	0.0560325	0.271949	rho	chr3L	1464654	1464959	109.227	184
chr2R	7989081	7989281	201	-0.478231	0.0560635	0.271949	ACC	chr2R	7989050	7989299	124.931	200
chr2R	10423210	10423410	201	-0.478376	0.0562156	0.272081	CG11825	chr2R	10423339	10423466	38.555	71
chrX	16263815	16264015	201	-0.478332	0.0563722	0.272665	NA	chrX	16263868	16263999	97.332	131
chr3L	14191279	14191479	201	-0.472411	0.0566764	0.273097	nuf	chr3L	14191309	14191546	74.01	170
chr3L	16489453	16489653	201	-0.471352	0.05716	0.273954	CG33158	chr3L	16489551	16489777	182.447	102
chr2L	8030917	8031117	201	-0.474768	0.0571985	0.273954	CG7367	chr2L	8030814	8031238	78.322	200
chr3R	17653657	17653857	201	-0.461809	0.0585098	0.276173	CG14322	chr3R	17653686	17654013	118.386	171
chr3L	2634979	2635179	201	-0.461471	0.0599943	0.278322	MEP-1	chr3L	2634910	2635241	164.105	200
chr3R	16702940	16703140	201	-0.471434	0.0600617	0.278322	Ubx	chr3R	16702800	16703303	487.11	200
chr3R	16960341	16960541	201	-0.469213	0.0606136	0.279708	Abd-B	chr3R	16960263	16960608	260.564	200
chr3R	8445130	8445330	201	-0.462055	0.0610802	0.280345	CG45263	chr3R	8445189	8445341	153.17	141
chr3L	14274145	14274345	201	-0.467177	0.0611368	0.280345	fz	chr3L	14274008	14274210	56.458	65
chr3L	14409439	14409639	201	-0.467811	0.0615676	0.280524	stwl	chr3L	14409450	14409696	95.944	189
chr3R	23201113	23201313	201	-0.468258	0.0617325	0.280842	cnc	chr3R	23201118	23201638	208.411	195
chr2R	21057125	21057325	201	-0.457833	0.0621785	0.281216	shg	chr2R	21057122	21057282	48.307	157
chrX	19889238	19889438	201	-0.463113	0.0622374	0.281216	Hers	chrX	19889059	19889514	104.225	200
chr2L	9158425	9158625	201	-0.458506	0.0624022	0.281216	CG32982	chr2L	9158420	9158710	237.648	200
chr2R	11184697	11184897	201	-0.46334	0.062588	0.281773	shn	chr2R	11184635	11184875	1469.49	178
chrX	8142178	8142378	201	-0.466603	0.062597	0.281773	Smox	chrX	8141681	8142247	170.239	69
chr2R	20914007	20914207	201	-0.462184	0.0638403	0.283588	FBgn0020617	chr2R	20913735	20914619	212.444	200
chrX	18535528	18535728	201	-0.464205	0.063932	0.283665	Bx	chrX	18535627	18535797	50.647	101
chr3R	15396762	15396962	201	-0.456679	0.0641109	0.28388	Rbp	chr3R	15396680	15396998	170.626	200
chr3R	20292145	20292345	201	-0.463624	0.064286	0.284237	cic	chr3R	20292090	20292356	41.887	200
chr2R	9979178	9979378	201	-0.451644	0.0643034	0.284237	eve	chr2R	9978832	9979460	265.028	200
chr3L	10674205	10674405	201	-0.455569	0.0653059	0.285365	simj	chr3L	10674155	10674482	95.838	200
chr3R	13901658	13901858	201	-0.459837	0.0654103	0.285365	ems	chr3R	13901503	13901850	415.718	192
chr3R	16899133	16899333	201	-0.450449	0.0656577	0.285553	FBgn0264857	chr3R	16899277	16900051	175.618	56
chrX	13844451	13844651	201	0.456065	0.0662858	0.286687	AMPdeam	chrX	13844156	13844776	1696.45	200
chr3L	543313	543513	201	-0.459297	0.0664779	0.286687	klar	chr3L	543029	543613	162.594	200
chrX	12925593	12925793	201	-0.458791	0.0668468	0.287557	fne	chrX	12925302	12925988	156.521	200
chrX	18371465	18371665	201	-0.458494	0.0672627	0.288076	FBgn0263769	chrX	18371115	18371637	113.336	172
chrX	21368465	21368665	201	-0.455007	0.0679374	0.2889	waw	chrX	21368400	21368883	94.552	200
chr2L	12055900	12056100	201	-0.457233	0.0679985	0.2889	JhI-21	chr2L	12055991	12056245	111.796	109
chrX	590548	590748	201	-0.454529	0.0680226	0.2889	CG13366	chrX	590484	590952	350.786	200
chr3R	25080534	25080734	201	-0.449046	0.0683402	0.289332	fd96Ca	chr3R	25080489	25080739	226.369	200
chr3R	16274737	16274937	201	-0.454167	0.0683532	0.289332	gish	chr3R	16274689	16274875	41.545	138
chr3L	19559438	19559638	201	-0.45623	0.0686381	0.289702	FBgn0265888	chr3L	19559476	19559693	104.978	162
chr3R	24605549	24605749	201	-0.445285	0.0687457	0.289996	mld	chr3R	24605574	24605732	304.373	158
chr2L	7306871	7307071	201	-0.455725	0.0688138	0.290106	wg	chr2L	7306773	7307354	942.796	200
chr3R	9809268	9809468	201	-0.445077	0.0688315	0.290106	FBXO11	chr3R	9808768	9809426	299.958	158
chrX	8061015	8061215	201	-0.451586	0.0688853	0.290106	fs(1)h	chrX	8060865	8061257	318.59	200
chr2R	10559722	10559922	201	-0.45315	0.0692098	0.290506	psq	chr2R	10559541	10559859	136.316	137
chr2R	14981812	14982012	201	-0.450644	0.0693634	0.290551	pcs	chr2R	14981516	14982019	98.226	200
chr3R	9874497	9874697	201	-0.451049	0.0696151	0.290878	Glut4EF	chr3R	9874536	9874960	78.925	161
chrX	19773874	19774074	201	-0.452553	0.0698503	0.291217	zld	chrX	19773690	19774297	139.919	200
chrX	18775050	18775250	201	-0.454089	0.0698569	0.291217	CCKLR-17D3	chrX	18774951	18775288	179.33	200
chr3R	18236037	18236237	201	-0.4486	0.0699778	0.291423	repo	chr3R	18235969	18236202	48.463	165
chr3L	12124172	12124372	201	-0.453935	0.0700409	0.291423	yps	chr3L	12124197	12124517	112.258	175
chr3L	10857745	10857945	201	-0.453085	0.0704434	0.291659	tna	chr3L	10857370	10857855	163.401	110
chr3R	16222194	16222394	201	-0.451711	0.0709115	0.291659	FBgn0267203	chr3R	16222272	16222405	39.907	122
chrX	4686327	4686527	201	-0.451556	0.0712963	0.292243	ctp	chrX	4686118	4686686	89.983	200
chr3L	15863223	15863423	201	-0.45149	0.0713111	0.292243	pHCl-1	chr3L	15863282	15863434	76.81	141
chr2L	18947555	18947755	201	-0.451228	0.0717152	0.292719	CG10428	chr2L	18947501	18947877	178.506	200
chr3L	10856643	10856843	201	-0.450982	0.0717917	0.292776	tna	chr3L	10856470	10857098	1136.21	200
chr3L	21584792	21584992	201	-0.451083	0.0718007	0.292776	TfAP-2	chr3L	21584768	21585025	95.894	200
chr2R	11197274	11197474	201	-0.449239	0.0719699	0.293034	shn	chr2R	11197302	11197572	143.129	172
chr3L	5630596	5630796	201	-0.448144	0.072004	0.293034	Blimp-1	chr3L	5630601	5630936	262.991	195
chr2L	4280545	4280745	201	-0.437777	0.072308	0.293773	tutl	chr2L	4280553	4280692	47.282	139
chr2L	249185	249385	201	-0.448341	0.0733352	0.294908	FBgn0265149	chr2L	249200	249334	52.349	134
chr3L	682461	682661	201	-0.446703	0.0734872	0.295052	CG17129	chr3L	682516	682645	42.1	129
chr3L	7560637	7560837	201	0.445064	0.0744896	0.296662	CG14837	chr3L	7560601	7560849	2083.84	200
chr2L	13550069	13550269	201	-0.44328	0.074619	0.296761	B4	chr2L	13550176	13550415	99.379	93
chr3L	11215916	11216116	201	-0.438227	0.0747184	0.296945	CG42671	chr3L	11215541	11216028	526.906	112
chr2L	19158166	19158366	201	-0.445563	0.0749735	0.297261	brat	chr2L	19158287	19158527	100.997	79
chrX	6868844	6869044	201	-0.443543	0.0754779	0.29802	CG14434	chrX	6868938	6869079	108.534	106
chr3L	12653230	12653430	201	-0.444859	0.0757084	0.298547	FBgn0263379	chr3L	12653190	12653460	328.419	200
chr3R	11377239	11377439	201	-0.434132	0.0770208	0.300369	pros	chr3R	11377261	11377443	114.092	178
chr3R	25472563	25472763	201	-0.441041	0.0773713	0.30081	Fur1	chr3R	25472698	25472861	50.478	65
chr2R	19293176	19293376	201	-0.441511	0.0773956	0.30081	mip40	chr2R	19293018	19293475	467.94	200
chr3R	4477587	4477787	201	-0.435096	0.0775274	0.30089	CG31523	chr3R	4477615	4477796	540.039	172
chr2R	13953992	13954192	201	-0.438519	0.0776433	0.301026	mRpL53	chr2R	13953694	13954306	344.684	200
chr2L	13215751	13215951	201	-0.432393	0.0776633	0.301026	FBgn0004192	chr2L	13215803	13215990	87.184	148
chrX	7607940	7608140	201	-0.44188	0.0776824	0.301026	ct	chrX	7608014	7608607	119.687	126
chr2R	12996285	12996485	201	-0.437056	0.0780099	0.301584	Su(z)2	chr2R	12996235	12996838	264.5	200
chr3L	19447039	19447239	201	-0.434192	0.0783561	0.301953	Chd3	chr3L	19446960	19447126	252.708	87
chr3L	11764982	11765182	201	-0.435354	0.0791346	0.302809	CG6024	chr3L	11764910	11765222	76.462	200
chr3L	4227251	4227451	201	-0.438157	0.079967	0.303881	ImpL2	chr3L	4227247	4227480	82.826	200
chr2R	14044232	14044432	201	-0.428966	0.0800236	0.303881	mam	chr2R	14044101	14044458	797	200
chrX	5901794	5901994	201	-0.434696	0.0800399	0.303881	Act5C	chrX	5901683	5902346	230.318	200
chr3R	9230056	9230256	201	-0.430288	0.080053	0.303881	pum	chr3R	9230175	9230324	175.079	81
chr2L	22018963	22019163	201	-0.437265	0.0801856	0.303881	tio	chr2L	22018817	22019057	42.1	94
chr2R	10485338	10485538	201	-0.436099	0.081591	0.306213	pre-lola-G	chr2R	10485339	10485471	52.909	132
chr3R	28547229	28547429	201	-0.433787	0.0821938	0.307038	mIF2	chr3R	28547362	28547588	383.534	67
chr3L	2466638	2466838	201	-0.428715	0.0825823	0.307284	Svil	chr3L	2466736	2466998	50.647	102
chr2R	7792485	7792685	201	0.428931	0.0827963	0.307402	Gapdh1	chr2R	7792630	7792771	55.762	55
chr3R	18849256	18849456	201	-0.430707	0.0828259	0.307402	Octalpha2R	chr3R	18849383	18849537	209.386	73
chr3R	29691192	29691392	201	-0.433813	0.0831967	0.307991	Obp99c	chr3R	29691045	29691367	80.913	175
chrX	4908938	4909138	201	-0.433534	0.0832541	0.308048	CG32772	chrX	4908868	4909234	134.439	200
chr2R	21481092	21481292	201	-0.431251	0.0834845	0.308091	Sdc	chr2R	21480703	21481309	144.766	200
chr2R	17801843	17802043	201	-0.431429	0.0842141	0.308735	grh	chr2R	17801629	17802005	355.828	162
chr3R	11389688	11389888	201	-0.429527	0.0842462	0.308735	pros	chr3R	11389711	11389986	90.159	177
chr3L	2867681	2867881	201	-0.430933	0.0844815	0.308892	Tet	chr3L	2867402	2867968	456.589	200
chr2L	594758	594958	201	-0.423228	0.0849928	0.309306	Gsc	chr2L	594749	595129	307.579	200
chrX	10802976	10803176	201	0.429309	0.0850912	0.309315	Imp	chrX	10802988	10803221	1923.22	188
chr3L	19663650	19663850	201	-0.429451	0.0860809	0.310119	tey	chr3L	19663642	19663986	395.432	200
chr3R	16764098	16764298	201	-0.426006	0.086138	0.310119	FBgn0020556	chr3R	16763950	16764460	630.189	200
chr3L	10737074	10737274	201	-0.429261	0.0863394	0.310119	NA	chr3L	10736998	10737647	273.323	200
chrX	16149144	16149344	201	-0.424604	0.086366	0.310119	disco-r	chrX	16149039	16149423	538.838	200
chr2R	14534362	14534562	201	-0.425669	0.086438	0.310119	ttv	chr2R	14534377	14534579	794.1	185
chr3L	17964878	17965078	201	-0.427693	0.0864856	0.310119	Eip75B	chr3L	17964845	17965093	112.528	200
chrX	2124303	2124503	201	-0.426519	0.0864981	0.310119	ph-d	chrX	2124227	2124691	114.006	200
chr2L	9521104	9521304	201	-0.420925	0.0872291	0.31097	Oatp30B	chr2L	9521261	9521848	112.756	43
chr3L	18759297	18759497	201	-0.41789	0.0872351	0.31097	ftz-f1	chr3L	18759298	18759435	46.767	137
chr3L	6606015	6606215	201	-0.426587	0.0877082	0.311123	ndl	chr3L	6605982	6606316	151.323	200
chrX	10474277	10474477	201	-0.421665	0.087989	0.3116	CG2889	chrX	10474238	10474687	105.794	200
chr3R	21060601	21060801	201	-0.425856	0.0885337	0.312553	Mvl	chr3R	21060696	21060998	120.984	105
chr3R	14363200	14363400	201	-0.413989	0.0886137	0.31263	NK7.1	chr3R	14363361	14363573	726.411	39
chr2R	9693233	9693433	201	-0.422643	0.0889112	0.3127	Uba1	chr2R	9692434	9693288	241.526	55
chr3L	20692586	20692786	201	-0.418773	0.0891971	0.31278	kni	chr3L	20692608	20692786	48.463	178
chrX	6861567	6861767	201	-0.424477	0.0894118	0.31278	CG14434	chrX	6861436	6861902	219.206	200
chr2L	19571542	19571742	201	-0.424142	0.0896265	0.31278	spi	chr2L	19571687	19572232	144.665	55
chr3R	12425817	12426017	201	-0.424792	0.0897042	0.31278	Pp1-87B	chr3R	12425846	12426369	187.012	171
chr3L	7149468	7149668	201	-0.424168	0.0898493	0.31278	corn	chr3L	7149540	7149691	256.577	128
chr3L	542859	543059	201	-0.41485	0.0899445	0.31278	klar	chr3L	543029	543613	162.594	30
chr3R	18923315	18923515	201	-0.421114	0.0906686	0.313679	Xrp1	chr3R	18923356	18924053	136.984	159
chr3L	23429301	23429501	201	-0.422489	0.0907204	0.313679	NA	chr3L	23429492	23429620	41.744	9
chr3L	14001999	14002199	201	-0.410769	0.0908721	0.313679	CG17359	chr3L	14001954	14002515	105.121	200
chrX	2303832	2304032	201	-0.422962	0.0910648	0.313834	Raf	chrX	2303709	2303968	114.394	136
chr3R	6678554	6678754	201	-0.419154	0.0912652	0.313968	lab	chr3R	6678503	6678869	441.484	200
chrX	9496169	9496369	201	-0.422191	0.0914211	0.314073	mgl	chrX	9495753	9496459	178.325	200
chr3R	21446406	21446606	201	-0.419705	0.0923498	0.315938	lbe	chr3R	21446272	21446822	297.563	200
chr2R	11198986	11199186	201	-0.420712	0.0927931	0.316234	shn	chr2R	11198900	11199247	86.905	200
chrX	9686284	9686484	201	-0.419711	0.0935774	0.317211	FBgn0261522	chrX	9686368	9686851	152.32	116
chrX	7111029	7111229	201	-0.419617	0.0936364	0.317211	fz4	chrX	7110873	7111273	350.647	200
chr3R	29556204	29556404	201	-0.417836	0.0936377	0.317211	Dr	chr3R	29555836	29556558	562.964	200
chr2R	14715831	14716031	201	-0.418691	0.0942219	0.317988	mspo	chr2R	14715889	14716061	409.161	142
chr2L	4371783	4371983	201	-0.407655	0.0945117	0.318262	Traf4	chr2L	4371710	4372068	187.046	200
chrX	5052878	5053078	201	-0.416708	0.0954657	0.319484	ovo	chrX	5052918	5053442	329.498	160
chrX	19683168	19683368	201	-0.416975	0.0954815	0.319484	Ubqn	chrX	19682904	19683432	368.137	200
chr3R	7037342	7037542	201	-0.416916	0.0955025	0.319484	FBgn0266238	chr3R	7037256	7037869	332.689	200
chr2R	11603452	11603652	201	-0.416387	0.0955954	0.319651	tou	chr2R	11603261	11603708	464.754	200
chr3R	6893436	6893636	201	-0.40928	0.0958505	0.319961	FBgn0267119	chr3R	6893173	6893542	131.77	106
chr3L	9152546	9152746	201	-0.415585	0.0966894	0.321229	Rdl	chr3L	9152540	9152691	44.354	145
chr3L	21067691	21067891	201	-0.415679	0.0967248	0.321229	siz	chr3L	21067588	21067928	101.873	200
chrX	3162846	3163046	201	-0.41172	0.0972942	0.321941	N	chrX	3162667	3163269	77.69	200
chr3L	9004987	9005187	201	-0.414849	0.0973849	0.322087	Doc3	chr3L	9004770	9005154	149.216	167
chrX	5046924	5047124	201	-0.414173	0.0978557	0.32269	ovo	chrX	5047033	5047403	93.459	91
chrX	3136483	3136683	201	-0.413299	0.0982031	0.322985	N	chrX	3136397	3136687	241.679	200
chr3L	10517703	10517903	201	-0.405038	0.0985258	0.323418	Rbfox1	chr3L	10517721	10517924	105.533	182
chr2R	21250377	21250577	201	-0.413344	0.0985795	0.323455	ASPP	chr2R	21250448	21250588	41.615	129
chr3R	6956841	6957041	201	-0.412891	0.0987605	0.323494	Antp	chr3R	6956778	6956933	82.796	92
chr3R	13812821	13813021	201	-0.407041	0.0988886	0.323494	tal-2A	chr3R	13812681	13813029	236.454	200
chr3R	28861404	28861604	201	-0.412616	0.0989152	0.323494	spg	chr3R	28861355	28861593	286.679	189
chr2L	3771603	3771803	201	-0.409415	0.100146	0.325368	bowl	chr2L	3771634	3771969	94.39	169
chr3R	7187076	7187276	201	-0.406753	0.100639	0.325657	CG10055	chr3R	7187047	7187392	39.907	200
chr3R	10108314	10108514	201	-0.406764	0.100906	0.326161	Fmr1	chr3R	10108437	10108588	42.831	77
chrX	8897196	8897396	201	-0.409211	0.10106	0.326161	Moe	chrX	8897104	8898198	125.329	200
chrX	6988826	6989026	201	-0.40508	0.102218	0.327285	ogre	chrX	6988876	6989183	89.119	150
chrX	17313448	17313648	201	-0.406537	0.103758	0.329591	B-H2	chrX	17313271	17313725	347.109	200
chr3R	28339714	28339914	201	-0.406085	0.104346	0.330201	Gfat2	chr3R	28339735	28339869	48.463	134
chrX	5746905	5747105	201	-0.3981	0.104586	0.330201	CG4078	chrX	5746861	5747229	413.846	200
chrX	15374178	15374550	373	-0.405552	0.104729	0.330309	acj6	chrX	15374298	15374554	142.049	252
chr3L	10810872	10811072	201	-0.405525	0.104743	0.330309	NA	chr3L	10810954	10811517	306.536	118
chr3L	20621680	20621880	201	-0.395414	0.105066	0.330575	knrl	chr3L	20621671	20622212	174.461	200
chrX	19298585	19298785	201	-0.396986	0.105107	0.330637	CG8034	chrX	19298435	19298671	1824.58	86
chrX	6231883	6232083	201	-0.404688	0.10518	0.330798	dtn	chrX	6231820	6232143	118.91	200
chrX	10815722	10815922	201	-0.402228	0.105285	0.330847	Imp	chrX	10815642	10815863	99.522	141
chr2R	15329264	15329464	201	-0.402833	0.105532	0.331084	CG8157	chr2R	15329201	15329536	239.858	200
chrX	616960	617160	201	-0.403008	0.105735	0.331178	CG13366	chrX	616963	617218	114.043	197
chrX	4684460	4684660	201	-0.404559	0.105837	0.331361	Pp2C1	chrX	4684353	4684860	397.392	200
chr3L	12693371	12693571	201	-0.403778	0.106529	0.332282	mirr	chr3L	12692764	12693597	424.114	200
chr3R	26024566	26024766	201	-0.397231	0.108013	0.333989	E(spl)m4-BFM	chr3R	26024317	26025083	216.295	200
chr2R	11475537	11475737	201	-0.398487	0.108103	0.334062	inv	chr2R	11475141	11475816	688.266	200
chr3R	9881508	9881708	201	-0.401045	0.108893	0.334835	Glut4EF	chr3R	9881371	9881771	90.124	200
chrX	2428977	2429177	201	-0.400596	0.109121	0.335034	gt	chrX	2428903	2429196	82.826	200
chr2L	15013671	15013871	201	-0.396335	0.110563	0.33685	GABA-B-R1	chr2L	15013560	15013879	1115.27	200
chr2L	12085795	12085995	201	-0.397308	0.111668	0.33685	prd	chr2L	12085762	12086070	143.665	200
chrX	21373884	21374084	201	-0.397703	0.111734	0.33685	slgA	chrX	21373950	21374095	48.648	134
chr3R	23279124	23279324	201	-0.393793	0.112149	0.33685	orb	chr3R	23279062	23279453	83.289	200
chr3L	2879564	2879764	201	-0.396066	0.112312	0.33685	Tet	chr3L	2879599	2879732	42.1	133
chr3L	21049690	21049890	201	-0.395802	0.112622	0.337255	siz	chr3L	21049570	21049780	120.192	90
chr2R	23621476	23621676	201	-0.396744	0.11266	0.337255	NA	chr2R	23621432	23621688	109.32	200
chr2R	18356415	18356615	201	-0.396412	0.112798	0.337421	sbb	chr2R	18356464	18357022	73.147	151
chr3R	17624540	17624740	201	-0.39378	0.112847	0.337434	FBgn0011993	chr3R	17624575	17624835	87.337	165
chr2L	701825	702025	201	-0.393424	0.112847	0.337434	ds	chr2L	701796	702141	102.264	200
chr3R	29088120	29088320	201	-0.394668	0.112933	0.337493	CG11873	chr3R	29087994	29088383	66.299	200
chr3R	24699378	24699578	201	-0.395698	0.11341	0.338072	slo	chr3R	24699363	24699666	1154.42	200
chr3R	13628520	13628720	201	-0.386249	0.113999	0.338618	NA	chr3R	13628583	13628761	70.053	137
chr2L	7533047	7533247	201	-0.394983	0.114284	0.338618	RapGAP1	chr2L	7533002	7533235	77.199	188
chr3R	14278726	14278926	201	-0.394536	0.114523	0.338921	trx	chr3R	14278632	14279204	358.974	200
chr2R	16580640	16580840	201	-0.394012	0.114695	0.338975	Cdk4	chr2R	16580618	16580932	144.404	200
chrX	3845602	3845802	201	-0.394339	0.114721	0.338975	ec	chrX	3845523	3845978	179.199	200
chr2L	8030634	8030834	201	-0.380543	0.11474	0.338975	CG7367	chr2L	8030814	8031238	78.322	20
chr3L	13904691	13904891	201	-0.389577	0.115325	0.339544	dysc	chr3L	13904553	13904709	136.8	18
chrX	6279269	6279469	201	-0.393071	0.115528	0.339544	CG3566	chrX	6278905	6279491	1015	200
chr3L	10811329	10811529	201	-0.393366	0.115589	0.339544	NA	chr3L	10810954	10811517	306.536	188
chr3R	25624598	25624798	201	-0.386608	0.116099	0.339749	Npl4	chr3R	25624522	25624698	72.783	100
chr2R	12914594	12914794	201	-0.389032	0.116118	0.339749	NAT1	chr2R	12914655	12914807	401.77	139
chr2R	6992750	6992950	201	-0.388655	0.116545	0.340214	Tsp42Ea	chr2R	6992676	6992961	97.508	200
chr3R	22220537	22220737	201	-0.390341	0.117975	0.34177	SKIP	chr3R	22220486	22220735	65.064	198
chrX	13624740	13624940	201	-0.385051	0.119414	0.34336	CG2691	chrX	13624640	13625368	255.581	200
chr2L	3538994	3539194	201	-0.387303	0.119416	0.34336	drm	chr2L	3538590	3539240	181.886	200
chrX	15333223	15333423	201	-0.388523	0.119446	0.34336	HDAC6	chrX	15333204	15333517	108.947	200
chr2L	17754193	17754393	201	-0.381913	0.119463	0.34336	CadN	chr2L	17754080	17754414	69.099	200
chrX	16147632	16147832	201	-0.386036	0.119934	0.343713	disco-r	chrX	16147568	16148555	411.337	200
chr3L	19791418	19791618	201	-0.386319	0.122207	0.346228	SREBP	chr3L	19791572	19792055	103.58	46
chrX	4616718	4616918	201	-0.385778	0.122261	0.346228	peb	chrX	4616718	4616862	158.04	144
chrX	11372847	11373047	201	-0.386346	0.122293	0.346228	dlg1	chrX	11372856	11373036	258.568	180
chr2R	20996974	20997174	201	-0.38565	0.12291	0.347045	dgt3	chr2R	20996689	20996983	139.253	9
chr2R	20996974	20997174	201	-0.38565	0.12291	0.347045	dgt3	chr2R	20997124	20997259	48.87	50
chr2R	5726896	5727096	201	-0.384504	0.123146	0.347118	ap	chr2R	5726841	5727143	160.553	200
chr3R	8181495	8181695	201	-0.38499	0.123224	0.347181	grn	chr3R	8181413	8182130	793.736	200
chr2L	16521359	16521559	201	-0.382654	0.123934	0.347843	CG5953	chr2L	16521293	16521638	144.492	200
chr2L	9421462	9421662	201	-0.38391	0.124308	0.348611	Mco1	chr2L	9421451	9421599	56.96	137
chr3R	11391141	11391341	201	-0.377085	0.124319	0.348611	pros	chr3R	11391094	11391359	97.972	200
chr3L	11562115	11562315	201	-0.37321	0.124971	0.349262	CG7394	chr3L	11561998	11562189	171.414	74
chr3L	7156350	7156550	201	-0.382851	0.125349	0.349426	CG8620	chr3L	7156365	7156527	93.585	162
chr3L	20401570	20401770	201	-0.382145	0.125832	0.34976	trbl	chr3L	20401581	20401809	111.363	189
chr2L	12056214	12056414	201	-0.377063	0.125843	0.34976	JhI-21	chr2L	12055991	12056245	111.796	31
chrX	8805872	8806072	201	-0.382032	0.126105	0.34976	Lim1	chrX	8805621	8806182	604.47	200
chrX	9495644	9495844	201	-0.382363	0.126105	0.34976	mgl	chrX	9495753	9496459	178.325	91
chr2L	12545337	12545537	201	-0.374334	0.127398	0.351245	bun	chr2L	12545445	12545587	110.177	92
chrX	22652500	22652700	201	-0.381025	0.127417	0.351245	NA	chrX	22652462	22652673	75.657	173
chr3L	11010362	11010562	201	-0.379817	0.127509	0.351294	klu	chr3L	11010403	11010813	197.256	159
chrX	6803541	6803741	201	-0.379604	0.127691	0.351543	pod1	chrX	6803281	6803834	137.334	200
chr2R	12985619	12985819	201	-0.379745	0.12776	0.35167	FBgn0265427	chr2R	12985810	12985989	72.472	9
chr2R	21502013	21502213	201	-0.378215	0.128705	0.352571	TAF1C-like	chr2R	21502092	21502365	38.555	121
chr2R	12201097	12201297	201	-0.374217	0.129201	0.352836	CG8858	chr2R	12200969	12201228	80.981	131
chr2R	11604460	11604660	201	-0.369168	0.130002	0.353751	tou	chr2R	11604510	11604703	140.375	150
chr2L	5009390	5009590	201	-0.37558	0.130288	0.354086	SelT	chr2L	5009481	5009814	73.403	109
chr2L	8809933	8810133	201	-0.375179	0.130627	0.354445	NA	chr2L	8809871	8810136	83.536	200
chrX	12090446	12090646	201	0.376917	0.131416	0.354953	FBgn0040859	chrX	12090439	12090689	2153.7	200
chrX	13263437	13263637	201	-0.315443	0.132095	0.355819	HDAC4	chrX	13263404	13263752	108.156	200
chr2L	2454610	2454810	201	-0.373788	0.132752	0.356053	dpp	chr2L	2454361	2454995	207.11	200
chr3L	10289488	10289688	201	-0.374392	0.133469	0.356501	FBgn0267665	chr3L	10289391	10289831	95.701	200
chrX	19865952	19866152	201	-0.374833	0.133619	0.356556	THADA	chrX	19865964	19866663	87.546	188
chrX	6119392	6119592	201	-0.374525	0.133783	0.356711	Ca-alpha1T	chrX	6119353	6119489	50.647	97
chr3R	7474700	7474900	201	-0.374682	0.133875	0.356711	FBgn0012000	chr3R	7474642	7474937	184.009	200
chr3R	22397131	22397331	201	-0.365505	0.134634	0.35742	FBgn0051162	chr3R	22397172	22397355	144.967	159
chrX	17160566	17160766	201	-0.371696	0.1351	0.357847	baz	chrX	17160580	17160861	134.914	186
chr3R	6991636	6991836	201	-0.372377	0.135942	0.358832	Antp	chr3R	6991701	6992266	324.829	135
chr3R	23141965	23142165	201	-0.367169	0.136061	0.358863	hh	chr3R	23141955	23142112	76.445	147
chr2R	20106445	20106645	201	-0.370879	0.136152	0.358863	NA	chr2R	20106371	20106742	444.99	200
chr3L	9134368	9134568	201	-0.371591	0.136646	0.359383	bol	chr3L	9134484	9134645	78.179	84
chr3L	18618305	18618505	201	-0.366757	0.136784	0.359559	not	chr3L	18618140	18618477	213.433	172
chr3L	13666836	13667036	201	-0.371551	0.13686	0.359634	bru3	chr3L	13666855	13667037	39.907	181
chr2R	16856427	16856627	201	-0.37107	0.13752	0.360684	Fen1	chr2R	16856266	16856655	279.713	200
chrX	6859371	6859571	201	-0.362282	0.137927	0.361008	CG14434	chrX	6859496	6859632	98.256	75
chr3R	30805861	30806061	201	-0.36932	0.138112	0.36118	wts	chr3R	30805778	30806056	118.701	195
chr2R	16086792	16086992	201	-0.366653	0.139109	0.362203	Dg	chr2R	16086941	16087072	42.1	51
chr2L	9929155	9929355	201	-0.365069	0.139324	0.36228	CG42366	chr2L	9929191	9929431	414.683	164
chrX	11703145	11703345	201	-0.367825	0.140465	0.363777	PhKgamma	chrX	11703185	11703376	494.307	160
chr2L	11447751	11447951	201	-0.365227	0.140821	0.364283	salm	chr2L	11447447	11448097	1056.09	200
chr2R	16103256	16103456	201	-0.366822	0.140852	0.364283	Rho1	chr2R	16102944	16103491	178.98	200
chrX	2136823	2137023	201	-0.366816	0.141433	0.36492	ph-p	chrX	2136800	2137302	245.163	200
chr3R	13074654	13074854	201	-0.365921	0.14213	0.365851	sim	chr3R	13074586	13074936	286.474	200
chr2R	25061730	25061930	201	-0.356251	0.142336	0.366072	gsb	chr2R	25061725	25061967	161.269	200
chr2L	3803831	3804031	201	-0.363787	0.142642	0.36655	Reph	chr2L	3803644	3804086	141.216	200
chrX	13128800	13129000	201	-0.366159	0.142725	0.366702	CG15717	chrX	13128886	13129080	42.1	114
chr2R	23632433	23632633	201	-0.362463	0.142997	0.367098	retn	chr2R	23632340	23632479	41.22	46
chr3R	10617163	10617363	201	-0.362692	0.143	0.367098	hth	chr3R	10616574	10617529	269.01	200
chrX	8806644	8806844	201	-0.363532	0.143992	0.367742	Lim1	chrX	8806561	8807109	170.804	200
chr3R	17617678	17617878	201	-0.360258	0.145224	0.369018	FBgn0011944	chr3R	17617760	17617892	143.057	118
chr2R	10041616	10041816	201	-0.356401	0.145249	0.369018	oys	chr2R	10041663	10041813	89.119	150
chr2L	4811731	4811931	201	-0.357909	0.145945	0.369801	CG15629	chr2L	4811686	4811972	184.544	200
chrX	19548462	19548662	201	-0.360488	0.146181	0.370213	CG32532	chrX	19548523	19548770	368.765	139
chrX	2123256	2123456	201	-0.36115	0.146728	0.370738	ph-d	chrX	2123188	2124052	437.487	200
chr3L	10675002	10675202	201	-0.361555	0.147	0.37095	simj	chr3L	10674960	10675241	283.667	200
chr3L	10194012	10194212	201	-0.354397	0.147139	0.370988	ect	chr3L	10193801	10194063	92.48	51
chrX	17739070	17739270	201	-0.360453	0.148067	0.372111	raskol	chrX	17738718	17739337	326.081	200
chr3R	8140913	8141113	201	-0.355207	0.14872	0.372743	FBgn0011959	chr3R	8140485	8141053	122.764	140
chrX	10473521	10473899	379	-0.360303	0.148877	0.372952	CG2889	chrX	10473633	10474190	61.74	266
chr3R	12280772	12280972	201	-0.354212	0.148907	0.372964	svp	chr3R	12280730	12281154	268.998	200
chr2R	9284171	9284371	201	-0.359901	0.149433	0.373519	Pkn	chr2R	9284192	9284337	48.463	145
chr3R	17558903	17559103	201	-0.355675	0.149748	0.374027	Hmx	chr3R	17558972	17559138	130.113	131
chr2R	21364554	21364754	201	-0.355218	0.149905	0.374123	cv-2	chr2R	21364566	21364811	234.426	188
chr3R	4803341	4803541	201	-0.358013	0.150694	0.375098	ctrip	chr3R	4803405	4803544	56.105	136
chr3L	14177551	14177751	201	-0.358521	0.150866	0.375228	D	chr3L	14177423	14178294	546.797	200
chr2R	20903566	20903766	201	-0.357969	0.151908	0.376333	otp	chr2R	20903461	20903814	340.36	200
chr3L	19929160	19929360	201	-0.351114	0.153389	0.377437	CG8004	chr3L	19929019	19929419	316.801	200
chr3R	16583701	16583901	201	0.345572	0.15364	0.37753	Scp2	chr3R	16583795	16583996	340.791	106
chrX	522438	522638	201	-0.353848	0.153739	0.37762	arg	chrX	522518	522647	42.1	120
chr3L	6979998	6980198	201	-0.355092	0.15433	0.37834	Galphai	chr3L	6980056	6980209	48.463	142
chr2L	14490685	14490885	201	-0.355053	0.154886	0.378971	noc	chr2L	14490466	14490860	166.108	175
chr3L	15031847	15032047	201	-0.35184	0.155796	0.380348	Sytbeta	chr3L	15031802	15032126	42.1	200
chr3R	8113578	8113778	201	-0.350137	0.155798	0.380348	puc	chr3R	8113386	8113683	64.33	105
chr2R	22512802	22513002	201	-0.351237	0.15615	0.380843	px	chr2R	22512739	22513051	60.642	200
chr2R	12958820	12959020	201	-0.349383	0.157308	0.38182	NA	chr2R	12958574	12959142	82.052	200
chrX	2136240	2136440	201	-0.352818	0.157784	0.382318	ph-p	chrX	2136330	2136508	133.452	110
chr3L	21479692	21479892	201	-0.352322	0.158221	0.382787	NA	chr3L	21479605	21480049	250.138	200
chr2L	8825443	8825643	201	-0.340562	0.158238	0.382787	SoxN	chr2L	8825148	8825838	243.143	200
chr3L	2585935	2586135	201	-0.349995	0.158296	0.382787	msn	chr3L	2585957	2586118	87.805	161
chrX	19322481	19322681	201	-0.350675	0.159477	0.383997	out	chrX	19322394	19322696	58.029	200
chr2L	6971793	6971993	201	-0.346963	0.159805	0.38421	snRNP-U1-70K	chr2L	6971801	6972079	118.797	192
chr2R	21428728	21428928	201	0.344581	0.160044	0.38428	Sdc	chr2R	21428747	21428920	439.053	173
chr2R	8668805	8669005	201	-0.349768	0.161091	0.385249	Acsl	chr2R	8668825	8668997	482.557	172
chrX	9173298	9173498	201	-0.349613	0.161523	0.385963	mei-P26	chrX	9173385	9173518	48.463	113
chr3R	6791567	6791767	201	-0.347673	0.161645	0.385974	Dfd	chr3R	6791431	6791843	260.806	200
chr3L	5634276	5634476	201	-0.349378	0.161679	0.385974	Blimp-1	chr3L	5634255	5634561	173.758	200
chr3L	22402898	22403098	201	-0.349451	0.161783	0.385974	Ten-m	chr3L	22402809	22403373	77.368	200
chr3L	16023305	16023505	201	-0.347861	0.161944	0.386074	Notum	chr3L	16023376	16023709	47.844	129
chrX	20159529	20159729	201	-0.347693	0.162213	0.386269	Rab35	chrX	20159476	20159764	97.819	200
chrX	13111889	13112089	201	-0.346994	0.162838	0.386756	CG43313	chrX	13111864	13112184	126.492	200
chrX	8061470	8061670	201	-0.345904	0.165244	0.389015	fs(1)h	chrX	8061511	8061760	55.864	159
chr2L	14508882	14509082	201	-0.346362	0.165487	0.389185	NA	chr2L	14508909	14509185	183.984	173
chr2R	13829246	13829446	201	-0.346215	0.165545	0.389185	CG6329	chr2R	13829205	13829507	184.438	200
chr3R	15420619	15420819	201	-0.345359	0.165836	0.389327	FBgn0262397	chr3R	15420733	15420887	247.956	86
chrX	16216991	16217191	201	-0.342669	0.16711	0.390727	disco	chrX	16216532	16217947	448.543	200
chr3L	11252128	11252328	201	-0.344938	0.167234	0.390727	scyl	chr3L	11252002	11252503	116.441	200
chrX	3779746	3779946	201	-0.344283	0.16746	0.390727	Tlk	chrX	3779669	3780024	486.984	200
chr3L	9041192	9041392	201	-0.344302	0.167533	0.390727	Doc1	chr3L	9040867	9041382	226.749	190
chrX	12744081	12744281	201	-0.343614	0.168693	0.39228	CG4004	chrX	12744226	12744396	78.513	55
chrX	20159748	20159948	201	-0.341675	0.168991	0.39252	Rab35	chrX	20159476	20159764	97.819	16
chr2R	17822470	17822670	201	-0.340706	0.169239	0.392659	grh	chr2R	17822252	17822662	151.414	192
chr2R	10583278	10583478	201	-0.339861	0.169616	0.393114	psq	chr2R	10583125	10583513	264.458	200
chr3L	16411665	16411865	201	-0.342873	0.16976	0.393208	fax	chr3L	16411566	16411728	110.15	63
chr3R	24231228	24231428	201	-0.342419	0.169881	0.39337	Spase22-23	chr3R	24231334	24231484	63.433	94
chr2R	21502519	21502719	201	-0.341264	0.170446	0.394098	TAF1C-like	chr2R	21502498	21502894	522.36	200
chr3L	5882004	5882204	201	-0.336216	0.170902	0.394197	CG13287	chr3L	5881258	5882241	191.422	200
chr3L	11009158	11009358	201	-0.337087	0.171317	0.394553	klu	chr3L	11009160	11009365	44.354	198
chr3R	30794849	30795049	201	-0.337331	0.172115	0.395001	wts	chr3R	30794708	30795235	305.289	200
chr2R	7326781	7326981	201	-0.339785	0.172426	0.395128	Dscam1	chr2R	7326773	7327028	380.711	200
chrX	6803831	6804031	201	-0.340502	0.172515	0.395128	pod1	chrX	6803281	6803834	137.334	3
chr2L	1411857	1412057	201	-0.337276	0.172607	0.395128	robo2	chr2L	1411888	1412019	63.433	131
chrX	7320919	7321119	201	-0.340466	0.172753	0.39524	CG1677	chrX	7320881	7321247	508.376	200
chrX	3449073	3449273	201	-0.34036	0.172862	0.395406	CG12535	chrX	3449051	3449193	132.057	120
chrX	9658280	9658480	201	-0.339478	0.17315	0.395768	Ptpmeg2	chrX	9658292	9658618	155.603	188
chr3L	18947099	18947299	201	0.334411	0.173423	0.395918	CG32204	chr3L	18947055	18947319	83.42	200
chr2L	868254	868454	201	-0.338469	0.17348	0.395987	aru	chr2L	867858	868457	78.155	200
chr3R	29069811	29070011	201	-0.332423	0.173818	0.396461	CG11873	chr3R	29069776	29070010	61.74	199
chr2L	18782925	18783125	201	-0.335104	0.174282	0.397223	ham	chr2L	18782852	18783608	234.848	200
chr3R	29456594	29456794	201	-0.334403	0.174489	0.397518	Ptp99A	chr3R	29456614	29456784	48.466	170
chr2R	22911824	22912024	201	-0.335445	0.174894	0.397689	nahoda	chr2R	22911991	22912218	59.08	33
chr2R	18689000	18689200	201	-0.338221	0.175221	0.397875	Sik3	chr2R	18688731	18689183	92.907	183
chr2L	21828399	21828599	201	-0.335516	0.175699	0.397974	tsh	chr2L	21828327	21828569	72.192	170
chr3R	29707252	29707452	201	-0.335584	0.177321	0.399904	NA	chr3R	29707265	29707484	240.681	187
chr2L	12546385	12546585	201	-0.336568	0.177637	0.400114	bun	chr2L	12546342	12546511	92.969	126
chrX	8214119	8214319	201	-0.335494	0.17881	0.401399	sdt	chrX	8213980	8214322	181.561	200
chr4	807779	807979	201	-0.330015	0.178885	0.401399	Sox102F	chr4	807953	808171	92.786	26
chr3R	26947480	26947680	201	-0.329137	0.179323	0.401981	Spag1	chr3R	26947262	26947663	275.282	183
chr3R	23886632	23886832	201	-0.333107	0.179684	0.402193	Pli	chr3R	23886619	23887108	553.612	200
chr3R	29069265	29069465	201	-0.333641	0.181252	0.403856	CG11873	chr3R	29069287	29069440	106.597	153
chr3R	24218723	24218923	201	-0.33324	0.181536	0.404049	twin	chr3R	24218720	24218980	267.22	200
chr3L	131355	131555	201	-0.331313	0.181876	0.404373	Pdk1	chr3L	131218	131562	1027.06	200
chr3L	492675	492875	201	0.324836	0.18242	0.404872	klar	chr3L	492660	492856	184.192	181
chr2R	14503827	14504027	201	-0.331954	0.182729	0.405135	Cpsf160	chr2R	14503888	14504563	160.606	139
chr3L	18814357	18814557	201	-0.331249	0.183637	0.406332	CG14073	chr3L	18814250	18814578	113.722	200
chrX	19750997	19751197	201	-0.329757	0.184528	0.406983	Pmp70	chrX	19750892	19751291	430.917	200
chr3R	11648689	11648889	201	-0.319452	0.184558	0.406983	Elp1	chr3R	11648877	11649113	203.342	12
chr3R	19802619	19802819	201	-0.329305	0.184637	0.406983	bnl	chr3R	19802684	19802830	90.9	135
chr3R	18007715	18007915	201	-0.330974	0.184858	0.406983	cpo	chr3R	18007780	18008007	69.402	135
chr3R	30912467	30912667	201	-0.329911	0.185372	0.407253	Ptx1	chr3R	30912249	30912819	950.535	200
chrX	10764238	10764438	201	-0.329525	0.186026	0.408021	Tango5	chrX	10764266	10764398	42.1	132
chr3L	10681904	10682104	201	-0.325727	0.186111	0.408021	simj	chr3L	10681966	10682127	53.87	138
chr2L	3580831	3581031	201	-0.326346	0.186268	0.408125	sob	chr2L	3580886	3581271	308.739	145
chr2L	15492050	15492250	201	-0.3293	0.186374	0.40824	NA	chr2L	15492089	15492436	44.354	161
chr3R	20949146	20949346	201	-0.321893	0.187249	0.409215	Atpalpha	chr3R	20948971	20949492	585.285	200
chr2L	13547934	13548134	201	-0.325201	0.187643	0.40949	B4	chr2L	13547967	13548196	63.795	167
chrX	17886567	17886767	201	-0.328384	0.187691	0.40949	CG6788	chrX	17886470	17886825	183.714	200
chr3L	21879357	21879557	201	-0.323789	0.188123	0.40989	mub	chr3L	21879332	21879573	81.839	200
chr2R	23573241	23573441	201	-0.325236	0.188699	0.410264	apt	chr2R	23573084	23573514	243.62	200
chr3R	16099764	16099964	201	-0.32733	0.189764	0.411642	Akt1	chr3R	16099748	16100007	283.386	200
chr2L	1970476	1970676	201	-0.325226	0.190557	0.412246	erm	chr2L	1970378	1970845	421.268	200
chr3L	14108210	14108410	201	-0.325636	0.19127	0.412859	Sox21a	chr3L	14108151	14108475	366.596	200
chr3R	21499567	21499767	201	-0.325168	0.191674	0.412876	C15	chr3R	21499443	21499926	258.573	200
chrX	12716039	12716239	201	-0.323292	0.193393	0.413801	Smr	chrX	12715899	12716242	133.562	200
chrX	16640790	16640990	201	-0.324487	0.193535	0.414047	mthl1	chrX	16640819	16640991	55.015	171
chrX	4910561	4911075	515	-0.322761	0.193678	0.414119	CG32772	chrX	4910506	4910927	227.636	366
chrX	18303916	18304116	201	-0.321809	0.19595	0.41664	NA	chrX	18303729	18303981	60.074	65
chr2L	14095772	14095972	201	-0.313256	0.197003	0.41771	NA	chr2L	14095828	14095975	65.095	144
chr3R	26259060	26259260	201	-0.318886	0.197457	0.418268	Ald1	chr3R	26259021	26259165	50.647	105
chr3R	18923855	18924055	201	-0.317173	0.198009	0.418623	Xrp1	chr3R	18923356	18924053	136.984	198
chr2R	22242151	22242351	201	-0.320759	0.198425	0.418939	dve	chr2R	22242010	22242395	350.281	200
chr2L	19571956	19572156	201	-0.320871	0.198549	0.418939	spi	chr2L	19571687	19572232	144.665	200
chrX	16637754	16637954	201	-0.314589	0.198559	0.418939	RpS19a	chrX	16637893	16638244	70.768	61
chr3R	9215777	9215977	201	0.314202	0.198898	0.419145	pum	chr3R	9215872	9216044	108.138	105
chr2R	22243107	22243307	201	-0.316576	0.199189	0.419413	dve	chr2R	22242542	22243170	157.142	63
chr2R	21720962	21721162	201	-0.319609	0.199932	0.420396	LBR	chr2R	21721073	21721230	50.113	89
chr3L	1628123	1628323	201	-0.31523	0.200425	0.420746	GC	chr3L	1628225	1628366	55.015	98
chr3L	19904825	19905025	201	-0.313238	0.200716	0.421018	Su(Tpl)	chr3L	19904902	19905090	179.055	123
chr3R	8642668	8642868	201	-0.316461	0.203232	0.423912	FBgn0012027	chr3R	8642675	8642835	121.331	160
chrX	23045184	23045384	201	-0.317362	0.203272	0.423928	CG12061	chrX	23045272	23045400	37.256	112
chr3R	8660378	8660578	201	-0.314954	0.203619	0.423986	bel	chr3R	8660360	8660543	41.744	165
chr3L	4252224	4252424	201	-0.316975	0.203867	0.42419	CG1265	chr3L	4252215	4252407	124.794	183
chr2R	10558906	10559106	201	-0.316928	0.203954	0.42419	psq	chr2R	10558820	10559083	219.93	177
chrX	687330	687530	201	-0.312839	0.204062	0.424299	sdk	chrX	687240	687481	57.181	151
chr2L	9731349	9731549	201	-0.316577	0.204603	0.424845	Nckx30C	chr2L	9731245	9731605	237.939	200
chr2R	22617513	22617713	201	0.316209	0.204684	0.424955	CG33143	chr2R	22617546	22617746	485.841	167
chrX	12751867	12752067	201	-0.312382	0.20495	0.425333	FBgn0265830	chrX	12751897	12752498	155.77	170
chr2R	22689695	22689895	201	-0.316157	0.205121	0.42546	Ppa	chr2R	22689710	22690074	85.246	185
chr2R	10536151	10536351	201	-0.313076	0.20658	0.426539	FBgn0263466	chr2R	10536156	10536363	83.307	195
chr2R	11289688	11289888	201	-0.313727	0.207114	0.427147	Fbl6	chr2R	11289267	11289736	76.165	48
chr3R	29618917	29619117	201	-0.313033	0.207564	0.42764	CG1907	chr3R	29618798	29619086	97.366	169
chr3R	14714394	14714594	201	-0.314431	0.207659	0.427752	kibra	chr3R	14714403	14714787	158.848	191
chr3R	16811868	16812068	201	-0.310302	0.208192	0.428307	abd-A	chr3R	16811752	16812109	384.654	200
chrX	19353637	19353837	201	-0.309613	0.208822	0.428629	kek5	chrX	19353521	19353894	113.514	200
chr3R	7000870	7001070	201	-0.313527	0.208831	0.428629	Antp	chr3R	7000670	7001258	577.392	200
chr2R	23759314	23759514	201	0.311542	0.208895	0.428629	sona	chr2R	23759392	23759612	239.187	122
chr3L	1100743	1100943	201	-0.308229	0.210758	0.430701	bab1	chr3L	1100778	1100968	1094.21	165
chr2R	19275447	19275647	201	-0.309712	0.21087	0.430756	rib	chr2R	19275235	19275915	751.013	200
chr3R	16830113	16830313	201	-0.311301	0.211383	0.431515	abd-A	chr3R	16830008	16830355	280.827	200
chr2R	16594260	16594460	201	-0.309815	0.21223	0.432813	CG8306	chr2R	16594235	16594533	204.92	200
chr2R	17716512	17716712	201	-0.308731	0.213853	0.434173	CG6424	chr2R	17716376	17716944	150.12	200
chr3R	25184460	25184660	201	-0.309875	0.214263	0.434212	dan	chr3R	25184397	25184567	97.689	107
chr3R	29764406	29764606	201	-0.308314	0.214498	0.434448	kay	chr3R	29764422	29764600	159.375	178
chr3R	16715682	16715882	201	-0.308398	0.216305	0.436151	Ubx	chr3R	16715571	16716038	409.876	200
chr3R	14382445	14382645	201	-0.308334	0.216404	0.436151	soti	chr3R	14382441	14382686	172.945	200
chrX	3718661	3718861	201	-0.307848	0.216426	0.436151	Rala	chrX	3718686	3719214	242.208	175
chr2R	7488625	7488825	201	-0.307025	0.216517	0.436151	wech	chr2R	7488711	7488888	98.641	114
chrX	10731594	10731794	201	-0.304666	0.216613	0.436151	stx	chrX	10731320	10731886	588.518	200
chrX	12735945	12736145	201	-0.307724	0.217128	0.436404	Smr	chrX	12736002	12736387	155.723	143
chr3R	12279086	12279286	201	-0.306502	0.219009	0.438658	svp	chr3R	12279023	12279213	42.1	127
chr2L	3836611	3836811	201	-0.306408	0.219117	0.438658	slp2	chr2L	3836515	3836876	223.357	200
chr3L	199204	199404	201	-0.304642	0.219213	0.438658	rno	chr3L	199179	199563	183.805	200
chr3L	21843402	21843602	201	-0.30359	0.219987	0.439253	P5CDh1	chr3L	21843415	21843583	68.225	168
chr3R	6978332	6978532	201	0.305659	0.220333	0.439713	Antp	chr3R	6978398	6978597	42.1	134
chr2R	13584790	13584990	201	-0.300943	0.220515	0.440019	CG6191	chr2R	13584653	13584967	105.928	177
chr2R	16102957	16103157	201	-0.305231	0.220759	0.440288	Rho1	chr2R	16102944	16103491	178.98	200
chr2R	18802507	18802707	201	-0.300131	0.220942	0.440358	MFS14	chr2R	18802568	18802930	97.729	139
chr3R	20829833	20830033	201	-0.30375	0.222271	0.441328	FBgn0027493	chr3R	20829835	20830024	79.681	189
chr3R	23819165	23819365	201	-0.301364	0.222371	0.441412	CG33111	chr3R	23818804	23819370	105.999	200
chr2R	20961421	20961621	201	-0.303409	0.223102	0.442035	hbn	chr2R	20960868	20961735	478.546	200
chr3L	21202904	21203104	201	-0.300464	0.224008	0.442528	CG10512	chr3L	21202916	21203083	56.96	167
chr3L	17303938	17304138	201	0.300626	0.224097	0.442647	NA	chr3L	17304003	17304180	471.46	135
chr3R	22794587	22794787	201	-0.293713	0.224182	0.442758	NA	chr3R	22794653	22794818	188.262	134
chr2L	4283047	4283247	201	-0.302046	0.225563	0.444562	tutl	chr2L	4282838	4283448	98.308	200
chr2R	24813755	24813955	201	-0.298165	0.226598	0.445624	Dll	chr2R	24813769	24814094	134.074	186
chrX	21351400	21351600	201	-0.301018	0.227304	0.446185	sol	chrX	21351452	21351635	383.888	148
chr2L	14385294	14385494	201	0.296373	0.228091	0.446669	NA	chr2L	14385280	14385512	564.985	200
chr2R	22700910	22701110	201	-0.297478	0.230124	0.448422	robo1	chr2R	22700407	22701010	352.157	100
chr3L	685176	685376	201	-0.295292	0.230216	0.448422	CG3386	chr3L	685210	685381	113.276	166
chr3L	14579096	14579296	201	-0.298667	0.231096	0.449331	NA	chr3L	14578878	14579407	380.278	200
chrX	13413043	13413243	201	-0.298004	0.231993	0.450362	CG1998	chrX	13412909	13413216	172.325	173
chr2L	3662503	3662703	201	-0.29628	0.232392	0.450506	Drgx	chr2L	3662338	3662715	275.555	200
chr2L	2013919	2014119	201	-0.297643	0.232638	0.45063	CG4238	chr2L	2013899	2014303	242.483	200
chr2R	9231381	9231581	201	-0.296253	0.232912	0.450845	hig	chr2R	9231276	9231781	271.212	200
chr2R	13941151	13941351	201	0.297368	0.233201	0.451273	shot	chr2R	13941099	13941462	81.886	200
chr2L	10376537	10376737	201	-0.291358	0.234208	0.452015	dpr19	chr2L	10376573	10376722	237.208	149
chrX	9666540	9666740	201	-0.29603	0.234981	0.452563	nej	chrX	9666513	9666834	122.06	200
chrX	6543930	6544130	201	-0.295343	0.235694	0.453142	CG34417	chrX	6543841	6544093	154.895	163
chr3L	3071055	3071255	201	-0.29142	0.237017	0.454251	PAN3	chr3L	3070560	3071087	130.393	32
chr3R	30764191	30764391	201	-0.291899	0.237251	0.45444	zfh1	chr3R	30764101	30764509	475.533	200
chr3R	6761239	6761439	201	-0.292978	0.237876	0.455058	Ama	chr3R	6761166	6761507	60.993	200
chr2L	16049787	16049987	201	-0.293563	0.237996	0.455058	beat-Ia	chr2L	16049745	16049872	38.555	85
chrX	13994920	13995120	201	-0.292178	0.238079	0.455058	ben	chrX	13994797	13995497	576.212	200
chr2R	24098555	24098755	201	-0.28864	0.238462	0.455193	gek	chr2R	24098748	24098923	48.463	7
chr3L	1463641	1463841	201	-0.292748	0.238523	0.455193	rho	chr3L	1463535	1464222	44.354	200
chr3L	14757321	14757521	201	-0.293262	0.238939	0.455695	Trl	chr3L	14757178	14757585	157.407	200
chrX	17651922	17652122	201	-0.292381	0.239077	0.455814	RhoGAPp190	chrX	17651680	17652085	96.573	163
chr3R	18421267	18421467	201	-0.290329	0.239231	0.45584	fru	chr3R	18421273	18421450	166.922	177
chr2L	20823815	20824015	201	-0.289891	0.239574	0.455977	CheB38c	chr2L	20823849	20823989	56.531	140
chrX	2305946	2306146	201	-0.292664	0.240051	0.456415	Raf	chrX	2305951	2306143	195.746	192
chr2L	16587920	16588120	201	-0.292162	0.240693	0.45661	mtgo	chr2L	16587966	16588277	159.904	154
chr3L	16043588	16043788	201	-0.29252	0.240806	0.456722	Diap1	chr3L	16043478	16044139	120.03	200
chr3L	6125183	6125383	201	-0.2914	0.24137	0.457157	l(3)mbn	chr3L	6125049	6125314	38.555	131
chr3R	25137827	25138027	201	-0.291742	0.241764	0.457674	danr	chr3R	25137755	25138068	42.1	200
chrX	9692732	9692932	201	-0.291579	0.242233	0.45805	btd	chrX	9692690	9692990	163.011	200
chrX	9109413	9109613	201	-0.291006	0.243275	0.458653	Bx42	chrX	9109476	9109662	44.354	137
chr3R	18108916	18109116	201	-0.286761	0.244899	0.460025	sr	chr3R	18108972	18109134	205.212	144
chr3R	4346635	4346835	201	-0.284976	0.245767	0.460509	hkb	chr3R	4346642	4347014	120.715	193
chr3R	13985319	13985519	201	-0.287886	0.248327	0.462802	rdx	chr3R	13985312	13985558	162.345	200
chr3R	11351920	11352120	201	-0.287603	0.248512	0.462858	pros	chr3R	11351857	11352300	169.345	200
chrX	9042466	9042666	201	-0.287082	0.249614	0.46395	Nost	chrX	9042337	9042713	432.26	200
chr2R	22270694	22270894	201	-0.276524	0.250089	0.464265	dve	chr2R	22270586	22271051	269.923	200
chr3L	20517448	20517648	201	-0.28309	0.253111	0.4672	CG5059	chr3L	20517323	20517735	621.496	200
chrX	20159048	20159248	201	-0.284369	0.253794	0.467398	Rab35	chrX	20158978	20159317	388.627	200
chr3L	17349703	17349903	201	0.275104	0.253863	0.467398	Mip	chr3L	17349748	17349884	103.147	136
chr2R	17604577	17604777	201	-0.278601	0.254393	0.468046	FBgn0050231	chr2R	17604522	17604780	182.924	200
chrX	15142073	15142273	201	-0.282687	0.256597	0.470146	RpL37a	chrX	15141934	15142437	434.841	200
chrX	7702637	7702837	201	-0.282611	0.256696	0.470188	CHES-1-like	chrX	7702527	7702829	286.591	192
chrX	10602143	10602343	201	-0.280096	0.258306	0.47227	CG1628	chrX	10602315	10602715	238.618	28
chr2L	3825473	3825673	201	-0.278617	0.260469	0.474063	slp1	chr2L	3825362	3825770	522.472	200
chr2R	22561466	22561666	201	-0.279721	0.26118	0.474904	px	chr2R	22561398	22562172	93.298	200
chr2R	14790889	14791089	201	-0.276373	0.261291	0.475036	kn	chr2R	14790920	14791074	72.846	154
chrX	2989448	2989648	201	-0.28	0.261315	0.475036	kirre	chrX	2989553	2989681	41.744	95
chr3L	16410566	16410766	201	-0.279466	0.261761	0.475637	fax	chr3L	16410393	16410732	110.689	166
chrX	19322955	19323155	201	-0.279452	0.262177	0.475825	out	chrX	19322931	19323103	223.698	148
chr2R	7418565	7418765	201	-0.279514	0.262205	0.475825	so	chr2R	7418453	7418863	443.437	200
chrX	14629961	14630161	201	-0.277872	0.265018	0.478162	NetA	chrX	14630056	14630199	85.88	105
chr2L	871362	871562	201	-0.270315	0.266165	0.47928	dbe	chr2L	871431	871669	61.231	131
chr2R	19629942	19630142	201	-0.271935	0.266417	0.47962	sm	chr2R	19629982	19630133	44.506	151
chr2R	12980826	12981026	201	-0.276479	0.267207	0.480361	Psc	chr2R	12980644	12981137	374.37	200
chr2L	2009470	2009670	201	-0.272122	0.26741	0.480548	CG4238	chr2L	2009573	2009841	38.555	97
chr3R	4994807	4995007	201	-0.215901	0.268515	0.481746	plh	chr3R	4994829	4995039	70.083	178
chrX	10822767	10822967	201	-0.274624	0.269687	0.482845	FBgn0267184	chrX	10822840	10823026	39.907	127
chr3R	15920806	15921006	201	-0.274075	0.271582	0.484371	Fbxl7	chr3R	15920987	15921140	85.72	19
chrX	2317315	2317515	201	-0.272366	0.271644	0.484371	Raf	chrX	2317394	2317667	80.131	121
chr2L	18881264	18881464	201	-0.268475	0.271733	0.484371	tup	chr2L	18881256	18881792	906.141	200
chr2L	850042	850242	201	-0.273286	0.271813	0.484371	drongo	chr2L	849873	850351	145.886	200
chr2R	18229797	18229997	201	-0.27267	0.27339	0.485181	fj	chr2R	18229785	18229981	124.115	184
chr3R	10826825	10827025	201	0.26869	0.274828	0.486882	Cad86C	chr3R	10826919	10827069	279.564	106
chrX	12579068	12579268	201	-0.271211	0.27589	0.487744	Pits	chrX	12579035	12579305	79.07	200
chr2L	4327093	4327293	201	0.266964	0.276003	0.487838	bdl	chr2L	4327111	4327290	848.591	179
chr3R	21460046	21460246	201	-0.270727	0.276581	0.488445	NA	chr3R	21460088	21460288	97.129	158
chr3R	30852020	30852220	201	-0.269276	0.276639	0.488445	tll	chr3R	30852075	30852211	42.1	136
chrX	6283524	6283724	201	-0.267048	0.277251	0.488995	CG11700	chrX	6283257	6283655	1288.65	131
chrX	5886927	5887127	201	-0.270459	0.277516	0.489293	FBgn0267228	chrX	5886931	5887073	43.58	142
chrX	17397233	17397433	201	-0.270519	0.277829	0.489582	B-H1	chrX	17397112	17397463	445.239	200
chr3L	19651467	19651667	201	-0.266158	0.278029	0.48965	Oat	chr3L	19651580	19651715	85.095	87
chr3L	15729352	15729552	201	-0.265457	0.278553	0.490133	comm	chr3L	15729317	15729564	62.89	200
chr2L	16534356	16534556	201	0.269468	0.279282	0.490958	CG5953	chr2L	16534239	16534428	80.655	72
chrX	19220472	19220672	201	-0.267811	0.280382	0.492202	CG7884	chrX	19220504	19220680	75.657	168
chrX	7959098	7959298	201	-0.267239	0.280852	0.492687	sws	chrX	7959093	7959431	44.506	200
chrX	15484631	15484831	201	-0.266651	0.280912	0.492692	Gmap	chrX	15484580	15484951	137.131	200
chrX	12654266	12654466	201	-0.268513	0.280919	0.492692	CkIalpha	chrX	12654280	12654573	74.532	186
chr2R	18061985	18062185	201	0.265197	0.281527	0.493361	CG34386	chr2R	18061992	18062235	1499.85	193
chr3L	18787872	18788072	201	0.261963	0.283108	0.494993	ftz-f1	chr3L	18787877	18788137	781.992	195
chr3L	17500623	17500823	201	-0.260393	0.283908	0.495573	Oatp74D	chr3L	17500700	17500897	936.067	123
chr3R	28336058	28336258	201	-0.266038	0.285365	0.496603	larp	chr3R	28336184	28336436	68.004	74
chr2R	15911995	15912195	201	-0.265743	0.286339	0.497843	sli	chr2R	15912068	15912209	288.783	127
chr2L	11445583	11445783	201	-0.264375	0.288182	0.49985	salm	chr2L	11445577	11446566	464.755	200
chr2R	21703152	21703352	201	-0.259633	0.288487	0.500033	HmgD	chr2R	21702927	21703218	113.475	66
chr2L	2376211	2376411	201	-0.26235	0.289272	0.500601	CG3609	chr2L	2376108	2376510	186.906	200
chr3L	10325634	10325834	201	-0.260408	0.289486	0.500754	FBgn0267668	chr3L	10325584	10325819	143.385	185
chr2L	12510040	12510240	201	0.259815	0.289756	0.500868	bun	chr2L	12510077	12510307	1640.04	163
chrX	7082495	7082695	201	-0.263651	0.289792	0.500868	Sxl	chrX	7082684	7082835	93.044	11
chr2L	20638510	20638710	201	-0.263652	0.289846	0.500868	CG31680	chr2L	20638468	20638651	48.463	141
chr2R	16156010	16156210	201	-0.26313	0.290228	0.500891	lbk	chr2R	16155952	16156308	167.989	200
chr3L	21476525	21476725	201	-0.261139	0.292584	0.50302	croc	chr3L	21476556	21477068	581.229	169
chrX	1608032	1608232	201	-0.260092	0.295887	0.505806	Mur2B	chrX	1607847	1608238	205.853	200
chr3L	640449	640649	201	-0.259321	0.296392	0.506142	FBgn0262451	chr3L	640418	640776	122.704	200
chr3L	11557361	11557561	201	-0.258041	0.298068	0.507638	Mob2	chr3L	11557343	11557646	213.374	200
chr3L	18439911	18440111	201	-0.25838	0.298427	0.507966	skl	chr3L	18439914	18440186	473.994	197
chrX	16637049	16637249	201	-0.258846	0.298589	0.508128	RpS19a	chrX	16637199	16637327	41.744	50
chr2R	14000960	14001160	201	-0.258328	0.299879	0.50926	mam	chr2R	14000908	14001061	67.675	101
chrX	4617378	4617578	201	-0.256513	0.302416	0.511825	peb	chrX	4617316	4617515	68.758	137
chr3L	21277039	21277239	201	0.252236	0.304649	0.513536	AcCoAS	chr3L	21276734	21277215	118.792	176
chr3L	22843203	22843403	201	-0.249315	0.306953	0.515698	FBgn0266585	chr3L	22843262	22843395	48.38	133
chr3R	14037469	14037669	201	-0.252922	0.307712	0.516149	CG9922	chr3R	14037534	14037749	512.713	135
chrX	19754141	19754341	201	-0.253952	0.308119	0.516388	Pmp70	chrX	19754144	19754328	493.608	184
chr2L	21860728	21860928	201	-0.253773	0.308369	0.516694	FBgn0266222	chr2L	21860816	21860954	113.006	112
chr3R	9220396	9220596	201	-0.25284	0.310046	0.51821	pum	chr3R	9220426	9220774	131.045	170
chr3R	25647115	25647315	201	-0.252469	0.310558	0.518664	jigr1	chr3R	25647097	25647361	77.174	200
chrX	18371086	18371286	201	-0.251446	0.312032	0.519861	FBgn0263769	chrX	18371115	18371637	113.336	171
chr2L	11363000	11363200	201	0.244334	0.312062	0.519861	salr	chr2L	11363168	11363297	37.054	32
chr2L	19791112	19791312	201	-0.250115	0.313273	0.520676	CdGAPr	chr2L	19791063	19791332	319.54	200
chr2R	18800448	18800648	201	-0.25022	0.314174	0.521717	MFS14	chr2R	18800423	18800727	283.689	200
chr3R	6402932	6403132	201	-0.246295	0.316549	0.523708	Dmtn	chr3R	6402926	6403150	139.113	200
chr3L	14674281	14674481	201	-0.246252	0.317304	0.524174	FBgn0011927	chr3L	14674343	14674473	46.436	130
chr3R	10079370	10079570	201	-0.248369	0.317393	0.524264	NA	chr3R	10079360	10079651	213.165	200
chrX	18309446	18309646	201	-0.248835	0.317938	0.524867	upd1	chrX	18309199	18309841	206.448	200
chr2L	21871551	21871751	201	-0.244998	0.318109	0.524878	FBgn0266225	chr2L	21871618	21871749	57.991	131
chrX	12703014	12703214	201	-0.247685	0.319387	0.525461	CG15725	chrX	12702973	12703525	505.885	200
chr2R	13824149	13824349	201	-0.247598	0.319985	0.525949	fl(2)d	chr2R	13823911	13824399	110.559	200
chr3L	377279	377479	201	-0.247704	0.320101	0.526001	trh	chr3L	377298	377579	216.19	181
chr2R	15112885	15113085	201	-0.241628	0.320545	0.526504	chn	chr2R	15112940	15113079	51.373	139
chr2R	10608427	10608627	201	-0.243875	0.323987	0.529987	psq	chr2R	10608429	10608569	117.291	140
chr3L	3964161	3964361	201	-0.241869	0.324444	0.530189	CG12605	chr3L	3964118	3964558	575.432	200
chrX	9152320	9152520	201	-0.240648	0.324504	0.530189	NA	chrX	9152368	9152653	79.36	152
chr3R	6414019	6414219	201	0.243661	0.326238	0.531243	gpp	chr3R	6413996	6414248	2048.2	200
chrX	15646736	15646936	201	-0.244118	0.327148	0.531779	NA	chrX	15646673	15646818	112.906	82
chr2R	10429867	10430067	201	-0.24283	0.329372	0.533955	CG12896	chr2R	10429883	10430179	99.036	184
chr3R	23295397	23295597	201	-0.242804	0.329393	0.533955	pnt	chr3R	23295301	23295710	223.637	200
chr3R	9394502	9394702	201	-0.241809	0.329977	0.534451	FER	chr3R	9394513	9394756	63.732	189
chr3R	4542155	4542355	201	0.240167	0.333253	0.537309	Mur82C	chr3R	4542183	4542443	102.967	172
chrX	935219	935419	201	-0.239417	0.334069	0.537855	TRAM	chrX	935080	935540	48.463	200
chr2L	3606685	3606885	201	-0.240331	0.334457	0.53806	odd	chr2L	3606515	3606914	249.825	200
chr2R	17836336	17836536	201	-0.236453	0.335399	0.538426	grh	chr2R	17836304	17836435	87.981	99
chr2L	11806963	11807163	201	-0.238567	0.336322	0.539397	crol	chr2L	11806954	11807312	458.555	200
chr3R	19321912	19322112	201	-0.235681	0.337845	0.540758	Dl	chr3R	19321877	19322193	92.541	200
chr2R	22860294	22860494	201	-0.238101	0.338964	0.541741	inaD	chr2R	22860183	22860659	449.889	200
chrX	11154953	11155153	201	-0.234471	0.339095	0.541741	Dlic	chrX	11154705	11155114	137.152	161
chr2R	17097361	17097561	201	-0.236278	0.339125	0.541741	GstS1	chr2R	17097502	17097711	1045.89	59
chr2R	20840908	20841108	201	-0.232168	0.339156	0.541741	NA	chr2R	20840989	20841116	38.555	119
chr2R	22546506	22546706	201	0.235957	0.340294	0.54257	px	chr2R	22546388	22546548	41.545	42
chrX	11495132	11495332	201	-0.235659	0.340607	0.542784	Drak	chrX	11495059	11495457	223.46	200
chr2L	11968951	11969151	201	-0.237247	0.340816	0.543004	FBgn0263019	chr2L	11968903	11969238	203.777	200
chr2L	6156751	6156951	201	-0.235794	0.342682	0.544942	CG31639	chr2L	6156772	6156934	249.662	162
chr3L	18400056	18400256	201	0.233151	0.34464	0.546185	rpr	chr3L	18400085	18400466	54.332	171
chr3L	20949535	20949735	201	0.235047	0.344866	0.546439	fng	chr3L	20949594	20949723	42.1	129
chrX	8412692	8412892	201	-0.234462	0.345508	0.547048	Trf2	chrX	8412876	8413036	39.907	16
chr3R	14598241	14598441	201	0.231661	0.347026	0.548255	stumps	chr3R	14598279	14598506	146.389	162
chr2L	19820714	19820914	201	-0.230006	0.347362	0.548459	sick	chr2L	19820714	19820950	220.196	200
chr3R	10133239	10133439	201	-0.233397	0.348686	0.549209	tws	chr3R	10133088	10133933	112.196	200
chr3R	8820624	8820824	201	-0.228461	0.348747	0.549209	CG8369	chr3R	8820750	8820926	38.555	74
chr2L	18629268	18629468	201	-0.233164	0.349203	0.549757	MESR3	chr2L	18629209	18629480	721.951	200
chrX	617530	617730	201	-0.233019	0.349503	0.550048	CG13366	chrX	617438	617638	38.418	108
chr2L	2010584	2010784	201	-0.230609	0.349532	0.550048	CG4238	chr2L	2010663	2011002	167.3	121
chr2R	17593142	17593342	201	-0.228784	0.350106	0.550235	Smurf	chr2R	17593131	17593314	70.997	172
chr2L	3540080	3540280	201	-0.228864	0.35098	0.55064	drm	chr2L	3540064	3540345	97.997	200
chr2L	2009716	2009916	201	-0.231156	0.35108	0.55064	CG4238	chr2L	2009573	2009841	38.555	125
chr3L	27172956	27173325	370	0.232128	0.351173	0.55064	NA	chr3L	27172971	27173272	527.671	301
chr2R	21480772	21480972	201	-0.231374	0.351884	0.551415	Sdc	chr2R	21480703	21481309	144.766	200
chr2L	3657957	3658157	201	-0.231062	0.352867	0.552047	for	chr2L	3657973	3658364	154.433	184
chr3R	21434308	21434508	201	0.230678	0.353485	0.552617	lbl	chr3R	21434239	21434623	315.525	200
chr2R	18688673	18688873	201	-0.230879	0.353673	0.552854	Sik3	chr2R	18688731	18689183	92.907	142
chrX	20025026	20025226	201	0.229629	0.355878	0.554721	FBgn0052826	chrX	20025089	20025256	179.986	137
chrX	9355852	9356052	201	-0.228755	0.357758	0.555926	BCL7-like	chrX	9355765	9356071	57.309	200
chr3R	12005493	12005693	201	-0.228869	0.357964	0.555969	Tk	chr3R	12005516	12005713	397.302	177
chrX	2112738	2112938	201	-0.228726	0.358039	0.556007	csw	chrX	2112774	2113037	73.174	164
chr2L	10841837	10842037	201	-0.223974	0.359153	0.556852	CG6700	chr2L	10841664	10841912	47.193	75
chrX	19783531	19783731	201	-0.228266	0.359196	0.556853	zld	chrX	19783583	19783791	90.124	148
chr3R	7130907	7131107	201	-0.223874	0.359446	0.556966	CG10068	chr3R	7130952	7131080	56.96	128
chr3R	28585357	28585557	201	-0.225322	0.359945	0.557343	fkh	chr3R	28585287	28585688	99.731	200
chr3R	16798629	16798829	201	-0.224767	0.360898	0.558016	FBgn0267314	chr3R	16798792	16798941	41.744	37
chrX	15143512	15143712	201	0.227434	0.361129	0.558016	CG9095	chrX	15143326	15143741	1135.04	200
chr2R	10535076	10535276	201	-0.226868	0.362246	0.558918	lola	chr2R	10535008	10535486	194.465	200
chr2L	7782766	7782966	201	-0.222479	0.362362	0.558984	CG7154	chr2L	7782952	7783199	58.256	14
chr3R	26010704	26010904	201	-0.224607	0.362895	0.559557	E(spl)malpha-BFM	chr3R	26010492	26010882	66.639	178
chrX	14824815	14825015	201	-0.22634	0.363412	0.559849	rut	chrX	14824514	14825199	327.923	200
chr2R	21101703	21101903	201	-0.226248	0.363513	0.559885	ktub	chr2R	21101655	21101918	111.853	200
chrX	3162188	3162388	201	-0.225689	0.363903	0.560168	N	chrX	3162140	3162493	232.802	200
chr3R	26947215	26947415	201	-0.223909	0.363995	0.560174	CG14252	chr3R	26947262	26947663	275.282	153
chr2L	11210480	11210680	201	-0.225422	0.364075	0.560174	ab	chr2L	11210423	11210583	113.475	103
chr2R	21843051	21843251	201	0.225612	0.364208	0.560244	FBgn0050407	chr2R	21843019	21843337	141.872	200
chr3R	13013043	13013243	201	-0.222968	0.366157	0.562396	CtBP	chr3R	13013037	13013305	50.455	200
chr2L	2175523	2175723	201	-0.220923	0.36637	0.56246	aop	chr2L	2175345	2175828	383.086	200
chrX	8650890	8651090	201	-0.222987	0.36652	0.562494	oc	chrX	8650653	8651551	942.373	200
chr2L	11965546	11965746	201	-0.224583	0.366656	0.562589	FBgn0263019	chr2L	11965712	11965839	40.695	34
chrX	4411458	4411658	201	-0.183559	0.367465	0.563208	bi	chrX	4411281	4411828	675.881	200
chr3R	16899771	16899971	201	-0.220957	0.372867	0.567259	FBgn0264857	chr3R	16899277	16900051	175.618	200
chr3R	13064272	13064472	201	-0.22158	0.372947	0.567259	sim	chr3R	13064016	13064553	359.36	200
chr2L	16422765	16422965	201	-0.221409	0.373937	0.568273	CG5888	chr2L	16422607	16423387	478.858	200
chr2R	7699135	7699335	201	-0.221071	0.374514	0.568772	LRR	chr2R	7699323	7699704	73.202	12
chr3R	6810716	6810916	201	-0.220122	0.375178	0.569248	FBgn0261503	chr3R	6810641	6810993	197.317	200
chrX	8081622	8081822	201	-0.217686	0.376729	0.570217	Ldsdh1	chrX	8081611	8081793	324.944	171
chrX	9284035	9284235	201	-0.219761	0.377424	0.570384	lz	chrX	9283975	9284510	83.265	200
chrX	4426928	4427128	201	-0.218922	0.378602	0.57133	bi	chrX	4426625	4427254	907.124	200
chr2R	7699373	7699573	201	-0.216662	0.37914	0.571753	LRR	chr2R	7699323	7699704	73.202	200
chr3L	13211153	13211353	201	-0.216429	0.380776	0.573007	FBgn0052126	chr3L	13211213	13211370	109.611	140
chrX	17713131	17713331	201	-0.168079	0.382146	0.574367	raskol	chrX	17713115	17713337	153.332	200
chr2L	5093187	5093387	201	-0.217191	0.382165	0.574367	Pgant5	chr2L	5092951	5093315	136.769	128
chr2L	19362836	19363036	201	-0.215565	0.383651	0.575912	dnt	chr2L	19363011	19363138	44.506	25
chr2R	17392147	17392347	201	-0.213256	0.384529	0.576236	CG10939	chr2R	17392214	17392344	80.655	130
chr2L	2202442	2202642	201	-0.216452	0.384586	0.576236	NA	chr2L	2202517	2202810	41.744	125
chrX	5637609	5637809	201	-0.215086	0.385086	0.576649	OtopLa	chrX	5637565	5637958	273.727	200
chrX	7604639	7604839	201	-0.215354	0.386643	0.577898	NA	chrX	7604415	7605066	221.435	200
chr2R	22676801	22677001	201	0.213483	0.387205	0.578115	NA	chr2R	22676830	22677043	55.015	171
chrX	8421212	8421412	201	-0.214223	0.387472	0.578392	Trf2	chrX	8421257	8421504	65.946	155
chrX	15604899	15605099	201	-0.214159	0.388187	0.578786	sog	chrX	15604989	15605151	163.009	110
chr3L	10325152	10325352	201	-0.213101	0.390471	0.580262	FBgn0267668	chr3L	10325127	10325388	54.293	200
chrX	7306566	7306766	201	-0.212607	0.391009	0.580496	brk	chrX	7306562	7306830	61.74	200
chr2R	24557023	24557223	201	-0.211193	0.391961	0.581286	CG4622	chr2R	24557045	24557247	1085.28	178
chr3R	19836807	19837007	201	-0.212511	0.392501	0.581667	bnl	chr3R	19836856	19837104	140.631	151
chrX	17077217	17077417	201	-0.212466	0.39277	0.581863	wcy	chrX	17076612	17077383	67.989	166
chr3R	18929654	18929854	201	0.209663	0.393441	0.582631	Mpc1	chr3R	18929690	18929871	527.477	164
chrX	2634600	2634800	201	-0.211024	0.39629	0.585541	sgg	chrX	2634430	2634853	146.292	200
chr3L	22130040	22130240	201	0.206665	0.398894	0.588134	NA	chr3L	22129949	22130212	61.74	172
chrX	2094390	2094590	201	-0.209666	0.399534	0.58872	csw	chrX	2094450	2094577	44.74	127
chrX	10936499	10936699	201	-0.207744	0.401461	0.590184	Myo10A	chrX	10936488	10936626	58.684	127
chr3R	29774556	29774756	201	-0.208325	0.401662	0.590184	kay	chr3R	29774596	29774795	95.431	160
chr3L	13493776	13494154	379	-0.20823	0.402844	0.591269	Tgi	chr3L	13493828	13493962	104.92	134
chr3L	11123981	11124181	201	-0.205865	0.403102	0.591534	Ufd1-like	chr3L	11124027	11124159	37.137	132
chrX	18864219	18864419	201	-0.205798	0.403696	0.591909	CG7326	chrX	18864196	18864453	101.183	200
chr2L	13513379	13513579	201	-0.207139	0.404943	0.593322	B4	chr2L	13513420	13513616	53.401	159
chr3R	29258064	29258264	201	0.167669	0.407485	0.595386	stg	chr3R	29257954	29258301	46.494	200
chrX	12760525	12760725	201	-0.204928	0.407754	0.595609	Paics	chrX	12760389	12760740	232.252	200
chr2R	16499956	16500156	201	-0.203556	0.408233	0.595986	Sema2a	chr2R	16499908	16500038	48.463	82
chr3L	16955325	16955525	201	-0.203747	0.408626	0.596083	Nc73EF	chr3L	16955213	16955484	86.594	159
chr2R	8327156	8327356	201	0.204518	0.40883	0.596295	pdm3	chr2R	8326969	8327580	472.339	200
chrX	7307688	7307888	201	-0.204609	0.409072	0.596504	brk	chrX	7307493	7307893	83.536	200
chr2L	20941230	20941430	201	0.198048	0.409687	0.596716	NA	chr2L	20941252	20941462	129.527	178
chrX	8676836	8677036	201	-0.204049	0.41032	0.597125	Rubicon	chrX	8676667	8676970	42.1	134
chrX	5094482	5094682	201	-0.204618	0.410817	0.597335	CG15465	chrX	5094292	5094686	81.395	200
chrX	11520345	11520545	201	-0.203883	0.411957	0.598536	Drak	chrX	11520357	11520546	128.566	188
chr2R	6142303	6142503	201	-0.198999	0.412707	0.599172	EcR	chr2R	6142171	6142304	44.506	1
chr3L	17446294	17446494	201	-0.198238	0.414289	0.600436	CG18265	chr3L	17446275	17446509	292.977	200
chr2R	13337308	13337508	201	-0.201022	0.416025	0.601692	FBgn0265104	chr2R	13337136	13337533	48.463	200
chr2L	2798947	2799147	201	-0.200233	0.416851	0.602373	Syt1	chr2L	2798925	2799181	150.705	200
chr3L	11586926	11587126	201	-0.2017	0.417126	0.602542	rt	chr3L	11586844	11587069	65.415	143
chr3R	16221555	16221755	201	-0.198596	0.417427	0.60269	FBgn0267203	chr3R	16221440	16221667	42.1	112
chr3L	8065957	8066157	201	-0.196617	0.417788	0.602984	FBgn0052361	chr3L	8065976	8066117	47.282	141
chrX	20694262	20694462	201	-0.200983	0.41937	0.604465	run	chrX	20693870	20694460	421.944	198
chr2R	15349534	15349734	201	-0.19924	0.423064	0.607661	unc-5	chr2R	15349436	15349857	83.17	200
chrX	18312624	18312824	201	-0.198451	0.424325	0.608779	FBgn0267168	chrX	18312482	18312959	75.657	200
chr2R	20907323	20907523	201	-0.196534	0.424998	0.609043	CAH15	chr2R	20907340	20907563	162.364	183
chr2R	23666851	23667051	201	-0.196672	0.425143	0.609043	Pde8	chr2R	23666907	23667042	72.192	135
chr3R	17069447	17069647	201	-0.194165	0.42562	0.609377	Dad	chr3R	17069419	17069641	61.74	194
chrX	12649905	12650105	201	0.197741	0.425902	0.609387	Tomosyn	chrX	12649274	12650050	490.178	145
chr3L	13211495	13211695	201	-0.197409	0.425911	0.609387	FBgn0052126	chr3L	13211507	13211669	83.696	162
chrX	5063416	5063616	201	-0.197072	0.426724	0.610045	ovo	chrX	5063533	5063702	583.01	83
chrX	681283	681483	201	0.197217	0.427874	0.610656	FBgn0286919	chrX	681317	681504	853.34	166
chr3R	31059593	31059793	201	-0.194676	0.428857	0.61126	dco	chr3R	31059605	31059832	202.801	188
chrX	5770782	5770982	201	-0.196044	0.429662	0.611761	CG3097	chrX	5770732	5771139	377.613	200
chr3R	16539162	16539362	201	0.19133	0.430151	0.611839	CG42342	chr3R	16539301	16539440	55.015	61
chrX	7294050	7294250	201	-0.196085	0.430266	0.611839	unc-119	chrX	7293924	7294173	134.199	123
chr3R	9488668	9488868	201	-0.190324	0.430765	0.612111	CG16779	chr3R	9488687	9488846	175.043	159
chr2L	2010827	2011027	201	-0.193148	0.431371	0.612681	CG4238	chr2L	2010663	2011002	167.3	175
chrX	7275795	7275995	201	-0.195556	0.431421	0.612681	FBgn0265457	chrX	7275841	7276005	204.571	154
chr2R	17028319	17028519	201	-0.195628	0.431685	0.612942	RhoGEF2	chr2R	17028183	17028567	207.723	200
chr3R	9985704	9985904	201	-0.194482	0.433836	0.615421	Art4	chr3R	9985746	9985912	121.52	158
chr3R	29749583	29749783	201	-0.1923	0.436429	0.617949	ATPsyngamma	chr3R	29749573	29749776	821.49	193
chr2R	24712813	24713013	201	-0.192271	0.43661	0.618092	Mid1	chr2R	24712826	24712994	305.365	168
chrX	7626672	7626872	201	-0.19233	0.437989	0.61882	ct	chrX	7626766	7627461	351.273	106
chr3R	29772695	29772895	201	-0.189982	0.440442	0.620462	kay	chr3R	29772706	29773290	321.489	189
chrX	13784305	13784505	201	0.190716	0.443246	0.622743	CtsB1	chrX	13784171	13784473	164.332	168
chr3R	18108536	18108736	201	-0.189283	0.443523	0.623017	sr	chr3R	18108647	18108789	121.163	89
chr3R	21824719	21824919	201	-0.18869	0.444842	0.624352	CASK	chr3R	21824662	21825124	108.648	200
chr3L	13236957	13237157	201	0.187341	0.446915	0.625826	caps	chr3L	13236946	13237185	487.736	200
chrX	2301792	2301992	201	-0.188041	0.448392	0.62691	Raf	chrX	2301745	2302001	80.054	200
chr2R	10432460	10432660	201	-0.188327	0.448863	0.62728	RanBPM	chr2R	10432325	10432657	106.823	197
chrX	2317582	2317782	201	-0.188151	0.449201	0.627465	Raf	chrX	2317394	2317667	80.131	85
chr2L	4020311	4020511	201	-0.186357	0.452113	0.630493	NA	chr2L	4020332	4020518	208.994	179
chr3R	18311584	18311784	201	-0.186763	0.452939	0.631094	PKD	chr3R	18311549	18311911	48.463	200
chr2L	5306583	5306783	201	-0.183898	0.45612	0.634108	vri	chr2L	5306637	5306766	38.418	129
chrX	8640862	8641062	201	-0.185322	0.456311	0.6342	oc	chrX	8640729	8641184	48.463	200
chrX	16839891	16840091	201	-0.183887	0.458727	0.63657	RSG7	chrX	16840077	16840221	50.647	14
chr2R	21646597	21646797	201	-0.1813	0.462458	0.639768	CG10082	chr2R	21646444	21646931	137.681	200
chrX	17178425	17178625	201	-0.181257	0.466292	0.642506	baz	chrX	17178496	17178979	72.611	129
chrX	3397914	3398114	201	-0.179302	0.466839	0.642853	CG12535	chrX	3398027	3398327	1537.97	87
chrX	6862710	6862910	201	-0.180657	0.467716	0.643653	CG14434	chrX	6862503	6863210	204.361	200
chrX	19604422	19604622	201	-0.179652	0.469275	0.64473	CG14220	chrX	19604462	19604616	70.053	154
chr3L	21048143	21048343	201	-0.176843	0.469292	0.64473	siz	chr3L	21047836	21048163	502.95	20
chr2L	5009633	5009833	201	-0.177952	0.469842	0.645053	SelT	chr2L	5009481	5009814	73.403	181
chr2L	21776116	21776316	201	-0.17713	0.472322	0.647187	CG31612	chr2L	21776136	21776361	94.195	180
chrX	9675031	9675231	201	-0.177234	0.47327	0.647941	nej	chrX	9674997	9675331	354.085	200
chr2L	10524557	10524757	201	0.177799	0.473609	0.648135	Lip4	chr2L	10524628	10524760	76.803	129
chr3L	21471970	21472170	201	-0.176238	0.47399	0.648445	NA	chr3L	21471949	21472204	123.88	200
chr3R	18585547	18585747	201	-0.177179	0.474741	0.648984	fray	chr3R	18585598	18585725	44.506	127
chr2R	16103882	16104082	201	-0.174603	0.474823	0.649038	Rho1	chr2R	16103924	16104131	1195.87	158
chr3R	22476739	22476939	201	-0.174348	0.477095	0.650453	Nrx-1	chr3R	22476801	22477139	137.708	138
chr2R	21182693	21182893	201	-0.173007	0.478643	0.652096	tud	chr2R	21182762	21182988	90.089	131
chr2R	12970854	12971054	201	-0.175806	0.479716	0.652822	Psc	chr2R	12970649	12970896	44.354	42
chr3R	7188025	7188225	201	-0.173587	0.482753	0.655411	CG10055	chr3R	7188016	7188334	112.387	200
chrX	18565702	18565902	201	-0.17404	0.484176	0.656509	FBgn0052546	chrX	18565761	18565889	50.618	128
chr3L	19682982	19683182	201	-0.168704	0.487018	0.659136	FBgn0265889	chr3L	19682963	19683192	83.094	200
chr3R	28672297	28672497	201	-0.166842	0.49352	0.664054	snu	chr3R	28672304	28672632	183.893	193
chrX	18298040	18298240	201	-0.169859	0.494718	0.665199	NA	chrX	18297850	18298651	315.045	200
chrX	15356486	15356686	201	0.168103	0.497556	0.667422	acj6	chrX	15356368	15356823	727.071	200
chrX	4678181	4678381	201	-0.167378	0.49893	0.668383	fzr	chrX	4678155	4678451	201.599	200
chr3R	19991531	19991731	201	0.164523	0.499569	0.669004	Hs6st	chr3R	19991630	19991765	98.647	101
chrX	21232005	21232205	201	-0.166851	0.500817	0.670026	FBgn0011954	chrX	21231845	21232225	112.736	200
chrX	6876495	6876695	201	-0.165601	0.50458	0.672603	CG43736	chrX	6876496	6876635	55.015	139
chr3R	23601313	23601513	201	-0.163466	0.510499	0.677156	CG10183	chr3R	23601415	23601542	44.506	98
chr2R	12991771	12991971	201	-0.162692	0.510659	0.677276	CG33798	chr2R	12991712	12991975	271.694	200
chrX	11656730	11656930	201	-0.163316	0.51119	0.677777	Ptp10D	chrX	11656863	11657033	38.555	67
chrX	6643186	6643386	201	0.162645	0.511903	0.678428	pigs	chrX	6643145	6643379	161.311	193
chr3L	9854955	9855155	201	-0.160175	0.512225	0.678677	RasGAP1	chr3L	9854714	9855052	131.793	97
chr2L	14097176	14097517	342	-0.158553	0.513345	0.679405	NA	chr2L	14097412	14097549	64.641	105
chr2R	20657899	20658099	201	0.160569	0.517666	0.68241	CG16799	chr2R	20657889	20658239	123.557	200
chrX	9693872	9694072	201	-0.160156	0.517684	0.68241	btd	chrX	9693710	9694383	710.339	200
chr2R	21707718	21707918	201	-0.156645	0.518551	0.68308	HmgD	chr2R	21707721	21707922	512.422	197
chrX	13805590	13805790	201	-0.157636	0.523307	0.686733	inaE	chrX	13805517	13805911	845.773	200
chr3R	18130770	18130970	201	0.154783	0.523961	0.68709	sr	chr3R	18130836	18131020	144.202	134
chr2R	22243757	22243957	201	-0.158198	0.524715	0.687693	dve	chr2R	22243757	22243983	120.082	200
chr2L	8416448	8416648	201	-0.155722	0.531175	0.693135	Akap200	chr2L	8416442	8416620	41.744	172
chr3R	29772993	29773193	201	0.154618	0.531474	0.693272	kay	chr3R	29772706	29773290	321.489	200
chr3R	10267077	10267277	201	-0.150057	0.536868	0.697567	Nuak1	chr3R	10267256	10267402	50.647	21
chr3R	24692997	24693197	201	0.152306	0.53805	0.698305	slo	chr3R	24692955	24693175	1696.54	178
chr3R	21853877	21854077	201	-0.152977	0.538264	0.698353	glec	chr3R	21853799	21854058	220.693	181
chr2R	20111230	20111430	201	-0.150197	0.539005	0.698493	18w	chr2R	20111103	20111473	216.827	200
chrX	7627027	7627227	201	-0.150222	0.540891	0.700283	ct	chrX	7626766	7627461	351.273	200
chr2R	8030914	8031114	201	-0.118447	0.541194	0.700534	Optix	chr2R	8030807	8031230	442.254	200
chr3R	5701125	5701325	201	-0.150547	0.544361	0.703281	plx	chr3R	5701077	5701368	1497.38	200
chr2L	6833724	6833924	201	-0.118053	0.54689	0.705238	sens-2	chr2L	6833726	6834021	64.821	198
chr3R	9865924	9866124	201	-0.144974	0.550491	0.708379	Teh1	chr3R	9866084	9866324	82.428	40
chr3R	8187803	8188003	201	-0.147754	0.550977	0.708884	NA	chr3R	8187803	8188019	148.077	200
chrX	7285469	7285669	201	-0.147621	0.551908	0.709442	CG1677	chrX	7285479	7285811	100.201	190
chr3L	18186873	18187073	201	-0.144924	0.552871	0.710062	hid	chr3L	18186810	18187152	375.615	200
chr2R	21453366	21453760	395	-0.142124	0.555073	0.711718	Sdc	chr2R	21453417	21453558	126.303	141
chr2L	18152385	18152585	201	-0.145339	0.556366	0.712629	CG17681	chr2L	18152386	18152514	37.256	128
chrX	22540302	22540502	201	-0.145716	0.557663	0.713811	CG17598	chrX	22540103	22540330	48.463	28
chr3R	7103455	7103655	201	-0.143565	0.558486	0.714325	Alh	chr3R	7103563	7103806	961.413	92
chr3L	20442978	20443178	201	0.141916	0.559337	0.714877	CG5910	chr3L	20442975	20443205	174.622	200
chr2R	9521324	9521524	201	0.144827	0.560346	0.715742	brp	chr2R	9521359	9521583	42.1	165
chr3R	36447	36647	201	-0.141437	0.561369	0.716353	NA	chr3R	36438	36596	92.864	149
chr2L	7530842	7531042	201	-0.143983	0.561483	0.716353	RapGAP1	chr2L	7530782	7531123	206.287	200
chr3R	4867835	4868035	201	0.143739	0.561979	0.716807	opa	chr3R	4867803	4868040	1803.04	200
chr2L	23239262	23239462	201	-0.142316	0.562428	0.717139	FBgn0267986	chr2L	23239455	23239607	101.889	7
chr2R	17460599	17460799	201	-0.139706	0.565007	0.718804	CG14478	chr2R	17460697	17460832	101.5	102
chr3L	8506496	8506696	201	-0.142833	0.565311	0.71895	CG43163	chr3L	8506579	8506720	48.463	117
chr3L	17059210	17059410	201	-0.141461	0.566838	0.7198	Rbp6	chr3L	17059272	17059467	486.1	138
chr3R	16431877	16432077	201	-0.140483	0.567723	0.720336	CG17565	chr3R	16431948	16432075	42.923	127
chr2R	20960976	20961176	201	-0.140716	0.570357	0.722535	hbn	chr2R	20960868	20961735	478.546	200
chrX	6874956	6875156	201	-0.140353	0.570826	0.722557	CG43736	chrX	6875020	6875160	101.186	136
chrX	13986510	13986710	201	-0.140353	0.57234	0.72374	mamo	chrX	13986597	13986734	104.745	113
chrX	5998056	5998256	201	-0.139769	0.573767	0.724365	CG4766	chrX	5998087	5998237	98.925	150
chr2L	21899445	21899645	201	-0.13911	0.575782	0.725907	CG11629	chr2L	21899259	21899636	189.02	191
chr2R	10548581	10548781	201	-0.137987	0.576082	0.726106	FBgn0283426	chr2R	10548488	10548620	41.887	39
chrX	18797613	18797813	201	-0.137571	0.579953	0.729235	bnb	chrX	18797552	18797720	46.016	107
chr2L	8031740	8031940	201	-0.134864	0.584019	0.732558	CG7367	chr2L	8031640	8031915	82.871	175
chrX	3748847	3749047	201	0.13584	0.584124	0.732607	Tlk	chrX	3748805	3749268	763.377	200
chr3R	4955355	4955555	201	-0.133195	0.584602	0.733025	Ubc6	chr3R	4955339	4955501	42.1	146
chr2L	14464830	14465030	201	-0.134992	0.587086	0.735172	NA	chr2L	14465026	14465420	120.974	4
chr2R	6162441	6162641	201	-0.130981	0.592946	0.740282	EcR	chr2R	6162518	6162786	39.532	123
chr2R	19345278	19345478	201	0.132438	0.593116	0.740412	fest	chr2R	19345371	19345512	77.081	107
chr2L	6821715	6821915	201	-0.131831	0.594753	0.741786	sens-2	chr2L	6821721	6821933	72.571	194
chr3L	9678271	9678471	201	-0.131776	0.596114	0.742605	fry	chr3L	9678284	9678587	282.841	187
chr2L	12366186	12366386	201	-0.130444	0.597947	0.743883	bru2	chr2L	12366013	12366396	190.459	200
chr2R	19254161	19254361	201	-0.130557	0.598548	0.744305	CG33453	chr2R	19254095	19254325	38.784	164
chr3L	5013778	5013978	201	-0.12957	0.5989	0.744583	Con	chr3L	5013855	5013984	38.418	123
chr3L	17979749	17979949	201	-0.128156	0.599844	0.744906	Eip75B	chr3L	17979611	17979797	481.16	48
chrX	15593623	15593823	201	-0.128602	0.601541	0.746386	CG9220	chrX	15593629	15593884	249.331	194
chr2L	8083678	8083878	201	-0.127365	0.602848	0.74675	Bsg	chr2L	8083361	8083870	235.798	192
chr3R	31725602	31725802	201	-0.127948	0.603868	0.747454	ttk	chr3R	31725554	31725994	82.826	200
chr2L	2127463	2127663	201	-0.126696	0.604554	0.747709	CG4259	chr2L	2127504	2127676	92.35	159
chrX	9778570	9778770	201	-0.128235	0.605622	0.748327	CG1354	chrX	9778481	9778860	486.567	200
chrX	7226119	7226319	201	0.128357	0.60571	0.748327	CG9650	chrX	7225949	7226357	215.341	200
chr2L	7418524	7418724	201	-0.12744	0.607448	0.749585	chm	chr2L	7418634	7418793	108.407	90
chr3R	21822291	21822491	201	0.126359	0.608249	0.750147	CASK	chr3R	21822397	21822575	183.86	94
chrX	17789532	17789732	201	-0.125255	0.610907	0.752726	OdsH	chrX	17789302	17790172	650.842	200
chr3R	16934301	16934501	201	-0.125823	0.612808	0.754227	Abd-B	chr3R	16934277	16934516	1289.59	200
chrX	2636043	2636243	201	0.124646	0.615194	0.755716	sgg	chrX	2636034	2636205	96.922	162
chr3L	6789963	6790163	201	-0.0980589	0.616718	0.756687	vvl	chr3L	6789762	6790108	120.156	145
chrX	16607980	16608180	201	-0.123432	0.617285	0.756844	mbt	chrX	16607643	16608316	273.257	200
chrX	16687620	16687820	201	-0.123991	0.617464	0.756919	2021-09-04	chrX	16687539	16687703	193.646	83
chr2R	20948355	20948555	201	0.120657	0.618125	0.757242	CG33704	chr2R	20948400	20948559	118.226	155
chrX	409552	409752	201	-0.123476	0.619429	0.757864	l(1)sc	chrX	409441	409581	42.1	29
chrX	7690822	7691022	201	0.122845	0.619573	0.757866	CHES-1-like	chrX	7690729	7691044	1675.49	200
chr2L	15478251	15478451	201	-0.120972	0.621959	0.759314	sna	chr2L	15478343	15478565	94.078	108
chr3L	8060519	8060719	201	-0.11933	0.623251	0.760343	bip1	chr3L	8060269	8060790	107.548	200
chr2L	516464	516664	201	0.121159	0.6254	0.762049	ush	chr2L	516576	516836	209.365	88
chrX	4589859	4590059	201	-0.121049	0.626327	0.762984	FBgn0052773	chrX	4589850	4590090	60.456	200
chr2L	12288638	12288838	201	0.11988	0.627942	0.764112	bru1	chr2L	12288617	12288842	171.178	200
chr2L	8683727	8683927	201	-0.118551	0.630437	0.765771	CG9289	chr2L	8683803	8683937	105.581	124
chr2R	9548172	9548372	201	-0.119316	0.630791	0.765924	CG1888	chr2R	9548144	9548452	481.352	200
chrX	19259925	19260125	201	-0.117777	0.633346	0.767419	rictor	chrX	19260084	19260217	48.463	41
chr3R	21589867	21590067	201	-0.118256	0.634095	0.767904	FBgn0263662	chr3R	21589787	21590105	1385.07	200
chr2L	16276305	16276505	201	-0.115197	0.634994	0.768431	crp	chr2L	16276234	16276369	48.463	64
chr3R	14019521	14019721	201	-0.117645	0.635548	0.768736	rdx	chr3R	14019598	14019731	52.909	123
chr3R	18032873	18033073	201	-0.115878	0.635679	0.768736	NA	chr3R	18032902	18033123	45.149	171
chr2L	18866544	18866744	201	0.117326	0.636742	0.769465	tup	chr2L	18866544	18866789	1307	200
chr3L	3226208	3226408	201	-0.117166	0.636746	0.769465	Larp4B	chr3L	3226235	3226383	52.52	148
chr2L	6794151	6794351	201	-0.116033	0.638404	0.77032	nrv2	chr2L	6794146	6794291	152.516	140
chr3R	21598639	21598839	201	-0.115396	0.641526	0.773047	InR	chr3R	21598573	21599014	709.067	200
chrX	9354958	9355158	201	-0.114252	0.645381	0.775424	BCL7-like	chrX	9354736	9355052	105.076	94
chrX	18023824	18024024	201	0.114269	0.645731	0.775661	Sh	chrX	18023777	18024081	145.886	200
chr3L	15988146	15988346	201	-0.113087	0.646679	0.776012	Hip14	chr3L	15988239	15988576	56.071	107
chrX	2343455	2343655	201	-0.0949187	0.647112	0.776096	Raf	chrX	2343417	2343698	292.091	200
chrX	12640754	12640954	201	-0.113419	0.647881	0.776484	Tomosyn	chrX	12640727	12641005	1473.32	200
chrX	16751295	16751495	201	-0.111999	0.649747	0.777605	goe	chrX	16751353	16751482	42.831	129
chr3R	13798149	13798349	201	-0.111437	0.651565	0.778863	FBgn0051331	chr3R	13798204	13798333	42.831	129
chr3R	27441427	27441627	201	0.111482	0.651778	0.779056	CG44290	chr3R	27441283	27441579	48.463	152
chr3R	19679917	19680117	201	-0.109191	0.652575	0.779409	Naam	chr3R	19679937	19680094	377.299	157
chr2L	20561415	20561615	201	-0.111348	0.652722	0.779476	FBgn0263533	chr2L	20561345	20561499	145.987	84
chrX	19496204	19496404	201	-0.110779	0.653524	0.779706	Pfrx	chrX	19495829	19496222	90.103	18
chrX	8891782	8891982	201	-0.108985	0.653931	0.780039	Moe	chrX	8891502	8891995	107.173	200
chrX	5418030	5418230	201	-0.0884255	0.654631	0.780386	spoon	chrX	5418021	5418214	54.168	184
chr2L	14991505	14991705	201	-0.108813	0.655303	0.780769	mol	chr2L	14991467	14991691	47.849	186
chr2R	22561953	22562153	201	-0.110186	0.655592	0.780981	px	chr2R	22561398	22562172	93.298	200
chrX	12202442	12202642	201	-0.110585	0.65617	0.781243	Ten-a	chrX	12202382	12202602	38.555	160
chr3L	14550901	14551101	201	-0.109242	0.658324	0.782607	Gbs-70E	chr3L	14550961	14551148	50.647	140
chr3L	3817464	3817664	201	0.107756	0.658453	0.782607	enc	chr3L	3817423	3817568	105.128	104
chr2L	9176206	9176406	201	-0.107386	0.661657	0.784954	tai	chr2L	9176082	9176411	41.426	200
chr3L	4842832	4843032	201	-0.107387	0.662164	0.785434	CG13707	chr3L	4842612	4842987	79.628	155
chr3L	11246013	11246213	201	-0.107474	0.663347	0.786226	FBgn0265924	chr3L	11246077	11246330	179.322	136
chr2R	23113144	23113344	201	-0.107442	0.663485	0.786249	FBgn0266008	chr2R	23113206	23113373	274.696	138
chrX	10738930	10739130	201	0.107734	0.664524	0.787008	stx	chrX	10738909	10739183	539.241	200
chr3L	8031583	8031783	201	0.106478	0.66543	0.787653	nmo	chr3L	8031628	8031791	169.219	155
chr3L	1921036	1921236	201	-0.107157	0.666164	0.788259	Dbx	chr3L	1921015	1921302	272.43	200
chrX	6744308	6744613	306	-0.106561	0.666408	0.788259	RpL17	chrX	6744461	6744631	178.615	152
chr2L	10200916	10201116	201	-0.106183	0.668953	0.790267	RpL7	chr2L	10200924	10201136	55.015	192
chr3L	11215676	11215876	201	-0.105611	0.670768	0.791696	CG42671	chr3L	11215541	11216028	526.906	200
chrX	13277228	13277428	201	-0.104771	0.673208	0.793962	HDAC4	chrX	13277194	13277478	104.976	200
chr2L	5293057	5293257	201	0.102999	0.67376	0.794216	vri	chr2L	5293026	5293159	48.463	102
chr2L	8541542	8541742	201	-0.101797	0.675443	0.794919	Sema1a	chr2L	8541540	8541901	93.478	200
chr2R	10513897	10514097	201	-0.102908	0.675595	0.794993	lola	chr2R	10513968	10514107	120.15	129
chr3R	13983780	13983980	201	-0.103918	0.675827	0.795162	rdx	chr3R	13983748	13983954	91.933	174
chr3R	20253935	20254135	201	-0.103443	0.677031	0.796252	cic	chr3R	20253929	20254081	90.522	146
chr2R	17462144	17462344	201	-0.10296	0.67818	0.796866	CG14478	chr2R	17462093	17462313	1267.16	169
chrX	8533889	8534089	201	0.102713	0.678295	0.796899	Nrg	chrX	8533902	8534253	255.39	187
chr2R	20916181	20916381	201	-0.1023	0.678659	0.797182	FBgn0020617	chr2R	20916227	20916406	498.439	154
chr2R	23598832	23599032	201	-0.101751	0.679082	0.797387	apt	chr2R	23598883	23599032	68.625	149
chr3L	12515764	12515964	201	-0.101221	0.679288	0.797529	sti	chr3L	12515611	12515782	40.695	18
chrX	9284329	9284529	201	-0.102678	0.679575	0.797643	lz	chrX	9283975	9284510	83.265	181
chr2R	18309676	18309876	201	-0.101899	0.680454	0.798246	Tango8	chr2R	18309378	18309862	187.623	186
chrX	5517064	5517264	201	-0.101064	0.680643	0.798344	CG12730	chrX	5517035	5517275	1401.89	200
chrY	3560362	3560562	201	0.0949224	0.684422	0.800906	ORY	chrY	3560304	3560577	2292.67	200
chrX	6669089	6669289	201	-0.0998472	0.687434	0.802893	CG3198	chrX	6669037	6669564	524.692	200
chrX	4690859	4691059	201	-0.0995276	0.687707	0.803064	ctp	chrX	4690883	4691129	371.422	176
chr3L	10360332	10360532	201	0.0983215	0.68845	0.803604	FBgn0267668	chr3L	10360302	10360475	38.555	143
chrX	6104866	6105066	201	-0.0983754	0.691708	0.806216	Ca-alpha1T	chrX	6104853	6105113	119.772	200
chr3R	4802149	4802349	201	0.0984469	0.692077	0.80648	ctrip	chr3R	4802051	4802335	2336.49	186
chr3L	15535236	15535436	201	-0.0981258	0.692809	0.807085	CrebA	chr3L	15535123	15535454	282.734	200
chrX	15086058	15086258	201	-0.0979911	0.693401	0.80759	CG9065	chrX	15086052	15086312	54.721	200
chrX	2302275	2302475	201	0.0965973	0.697527	0.810476	Raf	chrX	2302278	2302424	55.015	146
chr3R	19688869	19689069	201	0.0939794	0.700714	0.813063	Naam	chr3R	19688919	19689079	397.833	150
chr3L	9817238	9817438	201	-0.0938385	0.701994	0.814053	CG43897	chr3L	9817291	9817490	123.054	147
chr3L	15988478	15988678	201	-0.0945316	0.702135	0.814154	Hip14	chr3L	15988239	15988576	56.071	98
chrX	16150644	16150844	201	-0.0937518	0.704057	0.815071	disco-r	chrX	16150489	16151082	239.717	200
chr2L	11977839	11978039	201	0.0934928	0.705248	0.815621	NA	chr2L	11977765	11978040	566.01	200
chrX	17178738	17178938	201	-0.0932983	0.706656	0.816407	baz	chrX	17178496	17178979	72.611	200
chr2R	8180476	8180676	201	0.091816	0.706964	0.816407	LRP1	chr2R	8180503	8180684	150.58	173
chrX	5579632	5579832	201	-0.0931943	0.707124	0.81646	NA	chrX	5579398	5579927	594.024	200
chrX	17346101	17346301	201	0.0918611	0.711224	0.819202	NA	chrX	17345767	17346384	120.163	200
chr2R	18654094	18654294	201	0.0900706	0.711272	0.819202	Ntan1	chr2R	18653997	18654349	119.69	200
chr2L	12507745	12507945	201	-0.0919603	0.71141	0.819299	bun	chr2L	12507733	12507972	145.927	200
chrX	7271487	7271687	201	0.0910238	0.713878	0.821022	FBgn0265457	chrX	7271276	7271697	1254.13	200
chr3R	24555229	24555429	201	-0.0892233	0.714825	0.821665	FBgn0004188	chr3R	24555292	24555469	339.6	137
chrX	22092784	22092984	201	-0.0880702	0.716957	0.823189	NA	chrX	22092779	22093025	67.201	200
chr2L	1648791	1648991	201	0.0892872	0.717531	0.823547	chinmo	chr2L	1648808	1649030	1024.54	183
chrX	15125540	15125740	201	0.0885378	0.718575	0.824516	drd	chrX	15125472	15125664	203.783	124
chrX	19890163	19890363	201	-0.0883794	0.720099	0.825686	Hers	chrX	19890100	19890236	105.051	73
chr2L	6594270	6594470	201	0.0867848	0.72198	0.826899	CG11319	chr2L	6594331	6594572	230.556	139
chrX	3176179	3176379	201	0.0873677	0.725145	0.829165	dnc	chrX	3176229	3176375	105.277	146
chr3R	13673651	13673851	201	-0.0866998	0.726291	0.82979	Task6	chr3R	13673611	13673946	682.828	200
chr3R	15511545	15511745	201	0.0866633	0.72719	0.830381	CG44013	chr3R	15511651	15511778	44.506	94
chr3R	25588479	25588679	201	-0.0829024	0.734778	0.835998	msi	chr3R	25588466	25588668	37.054	189
chr3R	13395230	13395430	201	-0.0803472	0.739036	0.838693	CCHa2	chr3R	13395214	13395389	238.079	159
chr2R	5773099	5773299	201	-0.0810946	0.741519	0.840322	Gp210	chr2R	5773187	5773320	55.015	112
chrX	19866537	19866737	201	-0.0817287	0.742253	0.840904	THADA	chrX	19865964	19866663	87.546	126
chr2R	7488862	7489062	201	-0.0809017	0.744691	0.842664	wech	chr2R	7488711	7488888	98.641	26
chrX	15007844	15008044	201	-0.0809028	0.744787	0.842709	eag	chrX	15007945	15008083	85.737	99
chrX	7117730	7117930	201	0.0791079	0.748647	0.84521	NA	chrX	7117743	7117963	371.322	187
chrX	5086457	5086657	201	-0.0781384	0.750386	0.846134	CG15465	chrX	5086475	5086846	141.247	182
chr2R	7692937	7693137	201	0.0774526	0.751023	0.846134	LRR	chr2R	7692858	7693214	215.074	200
chrX	14038220	14038420	201	0.074242	0.764813	0.856467	NA	chrX	14038137	14038549	283.938	200
chr2R	22867784	22867984	201	-0.0738918	0.765255	0.856584	fd59A	chr2R	22867741	22867996	81.886	200
chr3R	3374222	3374422	201	-0.0736928	0.765614	0.856798	NA	chr3R	3374208	3374487	103.969	200
chr2R	7635494	7635694	201	-0.0712952	0.767556	0.858277	CG43340	chr2R	7635445	7635595	89.382	101
chrX	18290778	18290978	201	-0.0731615	0.768392	0.859023	FBgn0030911	chrX	18290696	18291125	392.457	200
chrX	16231366	16231566	201	-0.0721596	0.77045	0.860567	NA	chrX	16231459	16231631	450.971	107
chr2R	9194938	9195138	201	-0.0714095	0.773613	0.863087	unpg	chr2R	9195021	9195260	55.015	117
chrX	11622787	11622987	201	0.0713752	0.773904	0.863286	Ptp10D	chrX	11622785	11622948	161.685	161
chr2L	8683389	8683589	201	-0.0695068	0.776009	0.86466	CG9289	chr2L	8683442	8683619	358.704	147
chr3R	26024122	26024322	201	0.0703754	0.776791	0.865204	E(spl)m4-BFM	chr3R	26024317	26025083	216.295	5
chr3L	18005380	18005580	201	0.0702957	0.776891	0.865224	Eip75B	chr3L	18005410	18005586	42.1	170
chr3L	16690155	16690355	201	0.0676608	0.783934	0.869548	Lasp	chr3L	16690114	16690354	2085.29	199
chr2R	17476261	17476461	201	0.0679375	0.784228	0.86971	insb	chr2R	17476079	17476550	1690.37	200
chrX	12649523	12649723	201	0.0671841	0.785597	0.870911	Tomosyn	chrX	12649274	12650050	490.178	200
chrX	15498879	15499079	201	-0.0671617	0.786967	0.871669	Gmap	chrX	15498862	15499050	42.1	171
chrY	3562413	3562613	201	0.0663472	0.789485	0.873696	ORY	chrY	3562345	3562655	299.811	200
chr3R	18480699	18480899	201	0.0647194	0.79409	0.876438	fru	chr3R	18480807	18480982	68.625	92
chr2R	9072033	9072233	201	0.0640618	0.796253	0.878379	ana	chr2R	9072057	9072227	298.275	170
chr3R	21949365	21949565	201	-0.0616	0.799744	0.880824	Eip93F	chr3R	21949473	21949620	160.736	92
chr3L	11046607	11046807	201	-0.0620264	0.802435	0.882181	CG43693	chr3L	11046621	11046900	209.793	186
chr2L	9521545	9521745	201	-0.0617799	0.803517	0.882903	Oatp30B	chr2L	9521261	9521848	112.756	200
chr3R	17556331	17556531	201	0.060757	0.806079	0.884479	Hmx	chr3R	17556242	17556591	285.83	200
chr2L	7122056	7122256	201	-0.0595761	0.807244	0.885187	Pvf3	chr2L	7122019	7122232	81.762	176
chr2R	14984266	14984466	201	0.0590583	0.808871	0.886014	pcs	chr2R	14984330	14984481	47.844	136
chr2L	12618547	12618747	201	-0.0583107	0.810016	0.886822	Ref2	chr2L	12618324	12618777	170.81	200
chr3R	21561652	21561852	201	0.0588971	0.812628	0.888456	NA	chr3R	21561634	21561914	93.282	200
chrX	576966	577166	201	-0.0583273	0.813024	0.888456	Appl	chrX	576966	577161	842.207	195
chr3L	16050149	16050349	201	-0.0567995	0.8144	0.889358	Mbs	chr3L	16050124	16050357	255.536	200
chr2R	20000232	20000432	201	0.0567102	0.818309	0.891547	FBgn0050212	chr2R	20000304	20000431	44.506	127
chr3R	11340180	11340380	201	0.0554717	0.820187	0.892435	pros	chr3R	11340195	11340405	255.316	185
chr2L	12678376	12678576	201	-0.0557208	0.820713	0.892699	pdm2	chr2L	12678232	12678704	349.353	200
chr3R	17056379	17056579	201	-0.0547213	0.825692	0.895959	Dad	chr3R	17056330	17056985	176.896	200
chr2L	6536106	6536306	201	-0.0535901	0.826753	0.896709	eya	chr2L	6536127	6536396	76.293	179
chrX	21080410	21080610	201	-0.0540846	0.826984	0.896812	bves	chrX	21080336	21080625	167.348	200
chr3L	2808264	2808464	201	-0.0539911	0.827935	0.897543	Tet	chr3L	2808250	2808642	342.226	200
chrX	3682553	3682753	201	-0.0534437	0.829529	0.898767	Mnt	chrX	3682529	3682850	155.917	200
chrX	17790182	17790382	201	-0.0524584	0.831213	0.899944	OdsH	chrX	17790354	17790484	42.1	28
chrX	16967490	16967690	201	0.0525899	0.831524	0.900025	Ubr1	chrX	16967592	16967729	42.1	98
chrX	8510824	8511024	201	-0.0523737	0.833039	0.901111	CG33181	chrX	8510823	8511094	191.087	200
chr3L	14634707	14634907	201	-0.0513997	0.833231	0.901233	RecQ5	chr3L	14634718	14634963	98.308	189
chr2R	10551892	10552092	201	-0.051239	0.836135	0.902855	NA	chr2R	10551630	10552172	414.077	200
chr3R	14046634	14046834	201	0.0492941	0.842245	0.906543	FBgn0011971	chr3R	14046679	14046862	574.19	155
chr2R	13045095	13045295	201	-0.049339	0.842611	0.906681	CG13323	chr2R	13045191	13045324	70.821	104
chrX	8227700	8227900	201	-0.0490831	0.843106	0.907085	sdt	chrX	8227712	8227877	368.551	165
chr3R	9450960	9451160	201	0.0474854	0.845447	0.908579	ps	chr3R	9451017	9451148	44.506	131
chr3R	30803517	30803717	201	-0.0471035	0.846109	0.908777	wts	chr3R	30803665	30803792	46.397	52
chr3L	7821725	7821925	201	-0.0469984	0.846915	0.909306	Pdp1	chr3L	7821725	7821892	95.745	167
chr2L	6783372	6783572	201	0.0459138	0.849503	0.911138	nrv1	chr2L	6783409	6783567	189.555	158
chr2R	20896390	20896590	201	0.0459763	0.851779	0.912616	otp	chr2R	20896339	20896594	200.481	200
chr2L	4301475	4301675	201	-0.043277	0.860623	0.91903	tutl	chr2L	4301483	4301711	1106.52	192
chr3L	5841665	5841865	201	-0.042957	0.861739	0.919782	vn	chr3L	5841731	5841911	149.948	134
chrX	10817005	10817205	201	-0.0400031	0.871004	0.924963	Imp	chrX	10816882	10817290	102.815	200
chr3R	14017761	14017961	201	-0.0386071	0.8754	0.928003	rdx	chr3R	14017687	14018096	1659.81	200
chr3R	29841359	29841559	201	0.0377921	0.876955	0.928746	Cad99C	chr3R	29841440	29841602	134.59	119
chrY	790439	790639	201	0.0373096	0.880187	0.93012	NA	chrY	790531	790733	66.605	108
chrX	19851371	19851571	201	0.0365506	0.88249	0.931507	Nup205	chrX	19851191	19851556	48.463	185
chrX	8271378	8271578	201	-0.0360851	0.883982	0.932372	CG1632	chrX	8271242	8271433	60.993	55
chr3R	10638821	10639021	201	-0.0354793	0.885544	0.93305	hth	chr3R	10638976	10639115	55.015	45
chr3L	20349484	20349684	201	0.0345397	0.886851	0.933577	Rbbp5	chr3L	20349522	20349655	47.844	133
chr3L	12627764	12627964	201	0.0342757	0.889032	0.934657	FBgn0052111	chr3L	12627701	12627982	71.386	200
chr3L	8456479	8456679	201	-0.033873	0.89088	0.93549	Gug	chr3L	8456425	8456669	2205.68	190
chr2R	5380118	5380318	201	-0.0337432	0.891048	0.93549	NA	chr2R	5380123	5380252	40.165	129
chrX	2634356	2634556	201	-0.0333051	0.891662	0.935873	sgg	chrX	2634430	2634853	146.292	126
chr2R	13818360	13818560	201	-0.0328352	0.893202	0.937103	stj	chr2R	13818380	13818601	1892.46	180
chr3L	10739363	10739563	201	-0.0326132	0.894472	0.937854	NA	chr3L	10739273	10739792	153.597	200
chr3L	12468096	12468296	201	-0.0326613	0.895082	0.938365	eyg	chr3L	12467902	12468436	326.181	200
chr2R	7530904	7531104	201	-0.0320904	0.896335	0.939317	Drat	chr2R	7530823	7531219	222.972	200
chr2L	4853188	4853388	201	-0.0322496	0.89673	0.939317	mRpS2	chr2L	4853235	4853427	956.498	153
chrX	19850854	19851054	201	-0.0320831	0.896896	0.939317	Nup205	chrX	19850953	19851111	37.256	101
chr2R	9376700	9376900	201	-0.0321215	0.897039	0.939317	CG13954	chr2R	9376707	9376936	303.106	193
chr3R	10133579	10133779	201	-0.0317646	0.8979	0.939798	tws	chr3R	10133088	10133933	112.196	200
chrX	12665138	12665338	201	-0.0315741	0.89836	0.939926	Tis11	chrX	12665191	12665323	48.463	132
chr3R	11392810	11393010	201	0.0306226	0.900599	0.941156	pros	chr3R	11392841	11393099	313.569	169
chrX	10344993	10345193	201	-0.0303374	0.902407	0.942026	FBgn0065046	chrX	10344931	10345280	105.999	200
chr2L	8749781	8749981	201	0.0297839	0.902771	0.942266	CG12438	chr2L	8749897	8750024	38.555	84
chr2R	10042901	10043101	201	-0.0296734	0.903593	0.942694	oys	chr2R	10042820	10043233	189.693	200
chr3R	6903575	6903775	201	-0.0292382	0.905683	0.94383	Antp	chr3R	6903600	6903782	85.786	175
chr2R	19788083	19788283	201	-0.0262617	0.914497	0.949832	FBgn0266766	chr2R	19788104	19788331	797.942	179
chr2L	377770	377970	201	-0.0255283	0.916957	0.951286	al	chr2L	377863	378040	42.1	107
chr2L	18777532	18777732	201	-0.0248917	0.919525	0.952912	ham	chr2L	18777558	18777741	176.969	174
chr2R	10554214	10554414	201	-0.0241031	0.921514	0.954134	NA	chr2R	10554079	10554440	129.26	200
chrX	7154058	7154258	201	0.024216	0.92161	0.954134	CG9650	chrX	7154038	7154209	243.393	151
chrX	7044866	7045066	201	0.022612	0.926766	0.956903	CG12541	chrX	7044943	7045109	383.493	123
chr3R	18548797	18548997	201	-0.0221037	0.927612	0.957561	NA	chr3R	18548802	18548986	617.488	184
chrY	2639536	2639736	201	0.016619	0.927663	0.957561	NA	chrY	2639474	2639611	107.457	75
chr3R	16025975	16026175	201	0.0225202	0.927717	0.957561	pnr	chr3R	16025774	16026105	199.298	130
chr3R	10622229	10622429	201	0.0216344	0.929002	0.958424	hth	chr3R	10622188	10622444	131.17	200
chrX	18627109	18627309	201	-0.0203768	0.934563	0.96215	wgn	chrX	18627207	18627341	55.015	102
chrX	12699538	12699738	201	-0.0202801	0.934853	0.962254	Smr	chrX	12699469	12699761	124.679	200
chr2L	7976785	7976985	201	-0.0201477	0.935308	0.962496	Snoo	chr2L	7976771	7976973	75.657	188
chr2L	20469007	20469207	201	-0.0193524	0.936467	0.963134	FBgn0266315	chr2L	20469086	20469239	233.554	121
chrX	18814508	18814708	201	-0.0185733	0.939046	0.96468	CG42450	chrX	18814389	18814729	120.791	200
chr3R	27909564	27909764	201	0.0182229	0.940857	0.965434	mil	chr3R	27909629	27909974	267.006	135
chrX	8829461	8829661	201	0.0172843	0.944542	0.967913	NA	chrX	8829576	8829738	300.374	85
chr2R	11604916	11605116	201	-0.0157397	0.949429	0.970769	tou	chr2R	11605000	11605303	67.921	116
chr2R	13826628	13826828	201	0.0155564	0.950024	0.971115	fl(2)d	chr2R	13826564	13826915	707.635	200
chrX	16091542	16091742	201	0.01417	0.954068	0.973683	Tob	chrX	16091541	16091790	38.555	200
chr3R	25152858	25153058	201	-0.0135288	0.955974	0.974456	NA	chr3R	25152935	25153113	58.785	123
chr3R	8642322	8642522	201	0.01329	0.95634	0.974564	FBgn0012027	chr3R	8642339	8642467	37.256	128
chr2L	6799680	6799880	201	-0.0133933	0.956688	0.974631	nrv2	chr2L	6799748	6799875	44.506	127
chr2R	6553127	6553327	201	-0.0133231	0.956922	0.974631	jing	chr2R	6553016	6553148	65.095	21
chrX	7608238	7608438	201	0.0132699	0.957407	0.974934	ct	chrX	7608014	7608607	119.687	200
chrX	22861892	22862092	201	-0.0131111	0.957849	0.975202	CG42346	chrX	22861890	22862316	615.707	200
chrX	16562358	16562558	201	-0.01286	0.958645	0.975609	Pp2B-14D	chrX	16562276	16562674	967.258	200
chrX	9744061	9744261	201	-0.0110604	0.964379	0.978895	Sp1	chrX	9744005	9744660	237.396	200
chr2R	14458286	14458486	201	0.00900059	0.96533	0.979598	Oaz	chr2R	14457991	14458595	260.79	200
chr3L	9813857	9814057	201	0.0101093	0.967011	0.980434	CG43897	chr3L	9813896	9814125	538.589	161
chr3R	30160418	30160618	201	0.00954528	0.968694	0.981184	CG11498	chr3R	30160442	30160570	41.744	128
chr2L	6186484	6186684	201	0.00856385	0.972257	0.983352	smal	chr2L	6186578	6186785	1190.36	106
chr2L	490617	490817	201	0.00853098	0.972319	0.983352	ush	chr2L	490575	490991	1149.74	200
chr2R	20966459	20966659	201	-0.0071747	0.976508	0.985461	NA	chr2R	20966541	20966687	55.015	118
chr2R	10168603	10168803	201	-0.00680811	0.977716	0.986127	KCNQ	chr2R	10168393	10168801	512.06	198
chrX	19866979	19867179	201	0.00636673	0.979532	0.987175	THADA	chrX	19866972	19867324	87.629	200
chrX	8924864	8925064	201	-0.00631995	0.979696	0.98721	CG12661	chrX	8924592	8925180	700.507	200
chr2L	2130354	2130554	201	-0.00574594	0.981548	0.988488	GlyP	chr2L	2130317	2130581	138.55	200
chrX	13237698	13237898	201	0.0043373	0.98302	0.989578	mew	chrX	13237755	13237962	196.226	143
chr3L	12467712	12467912	201	0.00377599	0.987707	0.992737	eyg	chr3L	12467902	12468436	326.181	10
chr3R	18924346	18924546	201	-0.00319087	0.989669	0.994026	Xrp1	chr3R	18924379	18924686	389.973	167
chr3R	15730668	15730868	201	0.00232219	0.992384	0.995913	CG34274	chr3R	15730629	15730758	42.796	90
chr2R	13716334	13716534	201	0.00135818	0.99563	0.997725	CG17716	chr2R	13716459	13716606	64.641	75
chr3R	27943533	27943733	201	-0.00117834	0.996107	0.997814	mfrn	chr3R	27943600	27943730	72.571	130
chr3R	25168791	25168991	201	0.000774645	0.997512	0.998729	NA	chr3R	25168744	25168932	411.685	141
chrX	12727911	12728111	201	-9.6956e-05	0.999689	0.999885	FBgn0264678	chrX	12727871	12728208	111.492	200
chrX	8897989	8898189	201	-0.498528	0.0469295	1	Moe	chrX	8897104	8898198	125.329	200
chr3R	6433792	6433992	201	-0.488612	0.0478926	1	gpp	chr3R	6433927	6434076	50.647	65
chrX	17076965	17077165	201	-0.489111	0.0505117	1	wcy	chrX	17076612	17077383	67.989	200
chrX	17423711	17423911	201	-0.489765	0.0508404	1	CG8611	chrX	17423563	17423930	107.268	200
chrX	13234477	13234677	201	-0.482071	0.0545173	1	mew	chrX	13234446	13234691	90.124	200
chr3R	9886689	9886889	201	-0.474713	0.0577159	1	Glut4EF	chr3R	9886456	9887069	268.864	200
chr2R	15425085	15425285	201	0.468695	0.0580186	1	CG30472	chr2R	15425083	15425440	447.467	200
chr3L	19178282	19178482	201	-0.459417	0.0647617	1	fz2	chr3L	19178276	19178541	74.683	200
chrX	18110650	18110850	201	-0.460292	0.0654503	1	wupA	chrX	18110648	18110874	57.403	200
chr3R	20898908	20899108	201	0.456824	0.0682179	1	Ktl	chr3R	20898989	20899130	137.404	119
chr2R	17364604	17364804	201	-0.449146	0.0711267	1	mbl	chr2R	17364631	17364870	65.992	173
chr3R	18417413	18417613	201	-0.439384	0.0792692	1	fru	chr3R	18417518	18417675	95.206	95
chrX	3332658	3332858	201	0.427667	0.0860493	1	dnc	chrX	3332713	3332909	323.353	145
chr3L	14287588	14287788	201	-0.420642	0.0925985	1	fz	chr3L	14287568	14287828	117.425	200
chr3L	2182181	2182381	201	-0.414974	0.0938696	1	NA	chr3L	2182176	2182434	523.131	200
chr3R	10546068	10546268	201	-0.419105	0.0939811	1	hth	chr3R	10546144	10546286	170.556	124
chr2R	19108446	19108646	201	0.409054	0.10089	1	FBgn0004168	chr2R	19108505	19108634	50.647	129
chrX	11339068	11339268	201	-0.409292	0.101732	1	Kap3	chrX	11339087	11339263	39.782	176
chr3L	18562630	18562830	201	-0.407414	0.103109	1	AstC-R1	chr3L	18562728	18562855	38.555	102
chrX	20150550	20150750	201	0.403294	0.105521	1	CG9572	chrX	20150365	20150562	280.25	12
chr2R	11145073	11145273	201	0.398399	0.10571	1	CG13229	chr2R	11145153	11145297	174.353	120
chr3L	15314739	15314939	201	-0.399136	0.10783	1	NA	chr3L	15314793	15314923	42.1	130
chr3L	10193723	10193923	201	-0.397386	0.11212	1	ect	chr3L	10193801	10194063	92.48	122
chrX	6889467	6889667	201	-0.387187	0.121345	1	NA	chrX	6889418	6889743	109.155	200
chr2L	12817491	12817691	201	0.370227	0.135392	1	kek1	chr2L	12817588	12817739	159.744	103
chrX	12720137	12720337	201	-0.367934	0.14019	1	FBgn0264678	chrX	12720066	12720380	192.284	200
chr2L	945144	945344	201	0.365497	0.140885	1	CG4341	chr2L	945206	945335	42.1	129
chr2L	14995495	14995695	201	0.360903	0.144531	1	mol	chr2L	14995673	14995808	88.856	22
chr2L	20970859	20971059	201	0.356334	0.146491	1	CG42238	chr2L	20970869	20971100	1220.36	190
chrX	6703563	6703763	201	-0.360118	0.149259	1	CG14441	chrX	6703612	6703751	56.96	139
chrX	13319657	13319857	201	0.359805	0.149412	1	IP3K2	chrX	13319716	13319862	48.463	141
chrX	20705222	20705422	201	0.352157	0.152723	1	NA	chrX	20705317	20705459	96.787	105
chr2L	1662447	1662647	201	-0.353159	0.155153	1	chinmo	chr2L	1662530	1662679	50.647	117
chr3R	9492012	9492212	201	-0.350342	0.157395	1	CG16779	chr3R	9492098	9492282	38.555	114
chrX	17484499	17484699	201	-0.351944	0.157962	1	CG43658	chrX	17484406	17484762	237.365	200
chrX	16124025	16124225	201	0.349993	0.16116	1	disco-r	chrX	16124025	16124240	1426.23	200
chrX	12673810	12674010	201	-0.349154	0.162147	1	Tis11	chrX	12673765	12674308	233.322	200
chrX	1893654	1893854	201	-0.346133	0.162983	1	arm	chrX	1893646	1893820	41.813	166
chr3R	6206428	6206628	201	-0.346302	0.164258	1	Osi24	chr3R	6206438	6206596	251.268	158
chrX	4190337	4190537	201	-0.344144	0.167307	1	Fas2	chrX	4190210	4190368	138.543	31
chr2L	7940461	7940661	201	0.343472	0.167719	1	Snoo	chr2L	7940452	7940691	38.784	200
chrX	20231756	20231956	201	-0.340109	0.173083	1	sw	chrX	20231536	20232008	106.106	200
chrX	4297549	4297749	201	-0.338341	0.174649	1	NA	chrX	4297630	4297761	91.853	119
chrX	10515573	10515773	201	-0.337156	0.175894	1	spri	chrX	10515599	10515853	86.607	174
chr2L	6149545	6149745	201	0.332156	0.179391	1	Muc26B	chr2L	6149518	6149695	519.766	150
chr3R	22798879	22799079	201	-0.328301	0.183978	1	NA	chr3R	22798965	22799103	42.1	114
chrX	21368706	21368906	201	-0.330005	0.186128	1	waw	chrX	21368400	21368883	94.552	177
chrX	8674804	8675004	201	-0.32951	0.18682	1	Rubicon	chrX	8674853	8675028	84.989	151
chr2R	11005725	11005925	201	0.315442	0.202247	1	luna	chr2R	11005561	11005957	337.757	200
chrX	18587370	18587570	201	0.317574	0.203157	1	FBgn0263503	chrX	18587313	18587562	105.076	192
chr2L	22631840	22632040	201	-0.312484	0.205482	1	CG40006	chr2L	22631941	22632070	42.1	99
chrX	12616113	12616313	201	-0.313519	0.208158	1	CG11085	chrX	12615820	12616332	155.283	200
chr3L	17135979	17136179	201	0.307528	0.211211	1	Rbp6	chr3L	17136136	17136266	48.796	43
chr2R	7887162	7887362	201	0.308209	0.214953	1	CG30377	chr2R	7887199	7887333	41.545	134
chrX	8393651	8393851	201	-0.30837	0.215253	1	NA	chrX	8393727	8393886	68.625	124
chrX	5179054	5179254	201	0.305544	0.218604	1	CG15465	chrX	5179120	5179297	58.421	134
chr2R	8385033	8385233	201	-0.303841	0.219433	1	pdm3	chr2R	8385054	8385211	72.094	157
chrX	3949768	3949968	201	-0.254353	0.219712	1	Vap33	chrX	3949884	3950037	50.647	84
chr2L	8566412	8566612	201	0.297411	0.230059	1	Sema1a	chr2L	8566465	8566595	82.134	130
chr3R	17362821	17363021	201	0.293375	0.238381	1	beat-IIa	chr3R	17362904	17363047	63.433	117
chr3L	14133084	14133284	201	-0.292744	0.238526	1	Sox21b	chr3L	14132978	14133364	263.737	200
chr3R	14002518	14002718	201	0.277903	0.255035	1	rdx	chr3R	14002576	14002766	485.087	142
chrX	6013472	6013672	201	-0.282013	0.257899	1	FBgn0029003	chrX	6013183	6013634	68.625	162
chrX	14971120	14971320	201	0.272336	0.27177	1	eag	chrX	14971081	14971382	553.076	200
chr3R	17736517	17736717	201	-0.27314	0.272724	1	TyrRII	chr3R	17736581	17736726	112.717	136
chrX	17423414	17423614	201	-0.257689	0.274599	1	CG8611	chrX	17423563	17423930	107.268	51
chr3L	4582356	4582556	201	-0.268043	0.275035	1	CG42540	chr3L	4582342	4582835	80.453	200
chr2R	21245261	21245461	201	-0.263524	0.285343	1	ASPP	chr2R	21245120	21245273	68.625	12
chrX	3558454	3558654	201	0.264304	0.288369	1	DIP-alpha	chrX	3558486	3558787	334.228	168
chr3L	5729175	5729375	201	-0.259158	0.293262	1	sif	chr3L	5729352	5729495	137.714	23
chr3L	18814097	18814297	201	-0.255013	0.305052	1	CG14073	chr3L	18814250	18814578	113.722	47
chrX	9544521	9544721	201	-0.251002	0.313115	1	CG32700	chrX	9544542	9544744	685.857	179
chrX	1606379	1606579	201	-0.242247	0.32939	1	Mur2B	chrX	1606501	1606655	162.607	78
chrX	12890241	12890441	201	-0.242009	0.329449	1	Pde9	chrX	12890153	12890331	471.73	90
chr3L	17968568	17968768	201	-0.240325	0.334314	1	Eip75B	chr3L	17968534	17968773	144.813	200
chr2L	5574570	5574770	201	0.233456	0.340091	1	NA	chr2L	5574590	5574806	335.128	180
chrX	8891339	8891539	201	-0.23149	0.352621	1	Moe	chrX	8891502	8891995	107.173	37
chrX	10059787	10059987	201	0.227197	0.361597	1	CG15312	chrX	10059815	10060052	286.369	172
chr3R	15680096	15680296	201	-0.21358	0.389906	1	pxb	chr3R	15680023	15680257	67.903	161
chrX	5636624	5636824	201	0.21332	0.390667	1	OtopLa	chrX	5636587	5636933	897.569	200
chr2R	9540816	9541016	201	-0.209029	0.397318	1	brp	chr2R	9540568	9540915	86.594	99
chrX	12083609	12083809	201	-0.210125	0.398652	1	FBgn0264675	chrX	12083648	12083790	65.095	142
chrX	11729928	11730128	201	-0.208556	0.401891	1	CG15221	chrX	11730020	11730195	150.896	108
chrX	276162	276362	201	-0.207003	0.404438	1	ewg	chrX	276148	276376	124.57	200
chr2L	9874698	9874898	201	0.205884	0.406314	1	nAChRalpha6	chr2L	9874591	9874861	241.363	163
chr3R	25586818	25587018	201	0.203926	0.411998	1	msi	chr3R	25586825	25587058	48.463	193
chr3L	18003267	18003467	201	-0.199208	0.420859	1	Eip75B	chr3L	18003254	18003546	102.958	200
chr3R	27491876	27492076	201	0.191729	0.434658	1	NA	chr3R	27491927	27492091	193.778	149
chr3R	10507311	10507511	201	-0.192406	0.437561	1	NA	chr3R	10507441	10507626	207.178	70
chr2R	19779871	19780071	201	-0.19033	0.443936	1	NA	chr2R	19779843	19780012	121.48	141
chr3R	28377450	28377650	201	0.186176	0.445189	1	NA	chr3R	28377498	28377663	341.546	152
chrX	2658471	2658671	201	-0.189363	0.445395	1	sgg	chrX	2658565	2658709	38.555	106
chrX	3719025	3719225	201	-0.189614	0.445959	1	Rala	chrX	3718686	3719214	242.208	189
chr3R	30076486	30076686	201	-0.189094	0.446001	1	sima	chr3R	30076512	30076725	115.62	174
chr3L	13703042	13703242	201	-0.188122	0.446275	1	bru3	chr3L	13703060	13703237	52.349	177
chr3L	15282706	15282906	201	0.185487	0.454947	1	NA	chr3L	15282785	15282918	48.463	121
chrX	6890102	6890302	201	0.183861	0.459943	1	NA	chrX	6890102	6890555	604.891	200
chrX	19907092	19907292	201	-0.183554	0.4607	1	Hers	chrX	19907140	19907486	146.309	152
chrX	4545016	4545216	201	-0.180361	0.464977	1	Usf	chrX	4545122	4545292	195.175	94
chr3R	6923835	6924035	201	-0.177863	0.474306	1	Antp	chr3R	6923726	6924152	50.647	200
chrX	20411724	20411924	201	-0.175898	0.479104	1	HERC2	chrX	20411739	20412025	175.776	185
chrX	7641240	7641440	201	-0.174396	0.481324	1	ct	chrX	7641249	7641500	138.677	191
chr3L	8034913	8035113	201	-0.174086	0.482416	1	nmo	chr3L	8034943	8035322	333.139	170
chr3L	2823576	2823776	201	0.17217	0.487021	1	Tet	chr3L	2823548	2823817	37.777	200
chr2L	14100534	14100734	201	0.171648	0.487263	1	NA	chr2L	14100561	14100693	118.701	132
chr3L	10054046	10054246	201	0.171839	0.487737	1	dpr6	chr3L	10054138	10054287	198.175	108
chr3R	21552370	21552570	201	-0.167689	0.496997	1	slou	chr3R	21552489	21552639	271.963	81
chr3R	21875151	21875351	201	-0.1631	0.509441	1	CG6656	chr3R	21875044	21875344	167.016	193
chr3L	8327826	8328026	201	-0.163097	0.51141	1	CG34462	chr3L	8327798	8327930	45.485	104
chr2L	1649027	1649227	201	0.162615	0.51211	1	chinmo	chr2L	1648808	1649030	1024.54	3
chr2R	16505963	16506163	201	0.156272	0.526528	1	Sema2a	chr2R	16505941	16506144	444.22	181
chr2L	14627452	14627652	201	0.153632	0.536711	1	osp	chr2L	14627528	14627720	773.225	124
chr2L	11563253	11563453	201	0.152189	0.538927	1	NA	chr2L	11563388	11563518	50.478	65
chr3L	13737444	13737644	201	0.149348	0.542436	1	bru3	chr3L	13737412	13737639	1160.57	195
chrX	15127976	15128176	201	0.126748	0.550597	1	drd	chrX	15128051	15128180	41.426	125
chr2L	20509865	20510065	201	0.143202	0.561997	1	NA	chr2L	20509953	20510123	328.66	112
chrX	19146671	19146871	201	0.137316	0.578827	1	RhoGAP18B	chrX	19146670	19146897	216.052	200
chr3R	27770644	27770844	201	-0.126732	0.609882	1	CG34353	chr3R	27770635	27770876	167.279	200
chrX	13893570	13893770	201	-0.108579	0.61003	1	mamo	chrX	13893610	13893774	105.533	160
chr3R	23962970	23963170	201	0.12137	0.625012	1	CG31140	chr3R	23962978	23963114	42.1	136
chrX	7978948	7979148	201	0.120893	0.62676	1	sn	chrX	7978951	7979162	106.184	197
chrX	13873790	13873990	201	-0.119283	0.630915	1	mamo	chrX	13873949	13874272	417.108	41
chrX	10515810	10516010	201	-0.11916	0.63121	1	spri	chrX	10515599	10515853	86.607	43
chrX	3696938	3697138	201	-0.118606	0.632791	1	Mnt	chrX	3697030	3697175	126.303	108
chr3L	18345267	18345467	201	-0.117325	0.63655	1	NA	chr3L	18345300	18345497	56.776	167
chrX	20536184	20536384	201	0.116989	0.637424	1	RunxB	chrX	20536218	20536423	374.218	166
chrX	8657131	8657331	201	-0.116933	0.637914	1	NA	chrX	8657000	8657447	841.065	200
chr3R	18699902	18700102	201	0.111739	0.652592	1	FBgn0267658	chr3R	18699951	18700105	50.647	151
chrX	5307659	5307859	201	0.110507	0.652735	1	snf	chrX	5307629	5307861	1744.43	200
chr2R	19819940	19820140	201	0.109508	0.655528	1	NA	chr2R	19820036	19820214	376.413	104
chr2L	8708996	8709196	201	0.110425	0.656889	1	Hnf4	chr2L	8709087	8709230	42.1	109
chr3R	27998167	27998367	201	0.109121	0.660416	1	FBgn0284420	chr3R	27998172	27998319	48.463	147
chrX	8100340	8100540	201	-0.101327	0.683438	1	CG2258	chrX	8100385	8100548	44.114	155
chrX	12076615	12076815	201	-0.100776	0.683906	1	FBgn0264675	chrX	12076576	12076834	199.682	200
chr3L	9255283	9255483	201	-0.0983797	0.689537	1	GluRIB	chr3L	9255364	9255498	42.1	119
chr3R	27736455	27736655	201	0.0940811	0.704328	1	Ets98B	chr3R	27736579	27736779	138.04	76
chrX	13863087	13863287	201	-0.094316	0.704362	1	mamo	chrX	13862934	13863096	249.084	9
chrX	19166239	19166439	201	-0.092104	0.710063	1	RhoGAP18B	chrX	19166303	19166445	126.056	136
chrX	13664094	13664294	201	-0.0902897	0.711407	1	NFAT	chrX	13664098	13664339	221.38	196
chrX	5866035	5866235	201	-0.0913794	0.713151	1	CG15764	chrX	5865989	5866168	47.844	133
chrX	8290320	8290520	201	-0.0892699	0.717544	1	nAChRalpha3	chrX	8290408	8290583	208.267	112
chr2L	6221684	6221884	201	-0.0857158	0.730059	1	NA	chr2L	6221738	6221869	70.997	131
chrX	14601976	14602176	201	0.0837547	0.731655	1	sbm	chrX	14601990	14602208	882.807	186
chr2R	12543547	12543747	201	0.0800156	0.743864	1	fra	chr2R	12543523	12543658	92.969	111
chr2R	13029611	13029811	201	-0.0758507	0.759847	1	NA	chr2R	13029539	13029669	48.463	58
chrX	8898254	8898454	201	-0.0742739	0.765013	1	Moe	chrX	8898327	8898476	48.463	127
chr2L	9834616	9834816	201	0.0708438	0.773081	1	nAChRalpha6	chr2L	9834690	9834821	134.545	126
chr3R	17932413	17932613	201	0.0682894	0.77987	1	cpo	chr3R	17932446	17932599	55.015	153
chrX	16146885	16147085	201	-0.0675357	0.785814	1	disco-r	chrX	16146909	16147103	869.786	176
chr3L	20182947	20183147	201	-0.0668998	0.787717	1	CG42674	chr3L	20183045	20183179	46.475	102
chr3R	20770512	20770712	201	-0.0655632	0.789123	1	Syp	chr3R	20770432	20770624	135.89	112
chr2R	13342906	13343106	201	0.0506654	0.7978	1	FBgn0265104	chr2R	13342929	13343079	160.845	150
chr2R	16395082	16395282	201	0.0624773	0.800672	1	Sema2b	chr2R	16395229	16395359	46.397	53
chrX	4200673	4200873	201	0.0471871	0.801129	1	Fas2	chrX	4200672	4200910	59.81	200
chr2L	7166739	7166939	201	0.053976	0.827811	1	NA	chr2L	7166724	7166917	308.368	178
chr3L	7437982	7438182	201	0.0460119	0.853044	1	Rac2	chr3L	7438014	7438201	316.669	168
chr3R	9204626	9204826	201	0.0433964	0.860759	1	pum	chr3R	9204685	9204867	662.183	141
chr3R	24710254	24710454	201	-0.0409565	0.868116	1	slo	chr3R	24710317	24710455	67.813	137
chrX	2988599	2988799	201	-0.040513	0.870029	1	kirre	chrX	2988488	2988633	105.4	34
chr3R	11989507	11989707	201	-0.0389832	0.873554	1	mfas	chr3R	11989565	11989749	239.618	142
chr2L	13071187	13071387	201	0.036576	0.882524	1	NA	chr2L	13071052	13071210	267.968	23
chrX	21060682	21060882	201	-0.0359637	0.88484	1	bves	chrX	21060711	21060861	90.702	150
chr3R	29014312	29014512	201	0.0341145	0.890521	1	wat	chr3R	29014372	29014506	70.636	134
chrX	10356895	10357095	201	-0.0328838	0.894379	1	l(1)G0289	chrX	10356925	10357083	335.904	158
chrX	18585206	18585406	201	-0.0297104	0.904778	1	NA	chrX	18585131	18585505	256.253	200
chr2L	1877181	1877381	201	0.0287345	0.907058	1	CG31663	chr2L	1877272	1877439	155.93	109
chrX	18159119	18159319	201	-0.0276538	0.911033	1	Frq1	chrX	18159134	18159389	293.358	185
chrX	13731102	13731302	201	-0.0273839	0.912238	1	g	chrX	13731123	13731361	241.818	179
chr3R	15302290	15302490	201	0.0273164	0.91226	1	Tm1	chr3R	15302349	15302483	130.044	134
chr2R	23134796	23134996	201	0.0258622	0.917104	1	NA	chr2R	23134800	23135015	915.273	196
chr2L	1652045	1652245	201	0.0239723	0.921998	1	chinmo	chr2L	1652057	1652270	463.518	188
chr2R	11724503	11724703	201	-0.0219399	0.928508	1	pyr	chr2R	11724542	11724687	99.94	145
chrX	16798281	16798481	201	-0.0209854	0.932491	1	CG9132	chrX	16798239	16798493	225.439	200
chr3L	8274094	8274294	201	0.0198661	0.935107	1	Dscam4	chr3L	8274114	8274241	44.506	127
chr3R	7944770	7944970	201	0.017982	0.94144	1	dsx	chr3R	7944819	7944954	79.356	135
chr3R	7266443	7266643	201	0.018007	0.941577	1	Gld	chr3R	7266513	7266642	58.421	129
chrX	8518470	8518670	201	0.0131881	0.957527	1	Nrg	chrX	8518565	8518728	167.273	105
chr3L	10898039	10898239	201	0.0115743	0.962729	1	Aps	chr3L	10898098	10898238	63.094	140
chr2L	490887	491087	201	0.0100973	0.967146	1	ush	chr2L	490575	490991	1149.74	104
chrX	14029953	14030153	201	-0.00801741	0.974232	1	NA	chrX	14030028	14030166	149.432	125
chr3R	11253882	11254082	201	0.00754748	0.975577	1	FBgn0262972	chr3R	11253866	11254112	80.444	200
chr3R	11257896	11258096	201	0.00528054	0.98298	1	FBgn0262972	chr3R	11257992	11258151	119.027	104
chr2L	12845716	12845916	201	0.00386618	0.987477	1	NA	chr2L	12845797	12845931	91.26	119
chr2L	18720267	18720467	201	-0.00122216	0.996051	1	CG10348	chr2L	18720464	18720615	126.422	3

## Sheet: nonDA wo CLAMP
ATAC-seq (MTD vs. clamp-i non-DA)
Chromosome	ChromStart	ChromEnd	ATACpeakSize	FC	p.value	FDR	GeneName
chr3R	3355060	3355260	201	0.49928	0.0401378	0.246471	NA
chr2L	865763	865963	201	-0.49879	0.0415564	0.249297	aru
chr3R	25074752	25074952	201	-0.496183	0.0417006	0.249297	shams
chr2L	14662845	14663045	201	-0.495439	0.041873	0.249882	osp
chr2L	10366587	10366787	201	-0.495486	0.0420702	0.250172	CG5056
chr2R	8893735	8893935	201	-0.494818	0.0422562	0.250497	CG8272
chr3L	10332207	10332407	201	-0.498572	0.0423359	0.250871	FBgn0267668
chr3R	11557720	11557920	201	-0.494009	0.0426037	0.251338	CG10898
chr3R	16273806	16274006	201	-0.498662	0.0426265	0.251338	gish
chr3R	9725049	9725249	201	-0.495685	0.0431585	0.253089	hyd
chr3R	29139081	29139281	201	-0.499673	0.0432132	0.253312	CG14512
chr3L	22884995	22885195	201	-0.498345	0.043323	0.25344	slif
chr3L	12266012	12266212	201	-0.496115	0.0433809	0.25344	CG32100
chr3L	19598690	19598890	201	-0.496728	0.0435033	0.25344	ash1
chr2R	10645576	10645776	201	-0.497572	0.0435076	0.25344	Git
chr2R	23870191	23870391	201	-0.499463	0.043579	0.25344	ken
chr3L	139870	140070	201	-0.499204	0.0435979	0.25344	Pdk1
chr2L	18248	18448	201	-0.493031	0.0436657	0.25372	l(2)gl
chr4	996309	996509	201	-0.495702	0.0439106	0.254562	toy
chr2L	18989939	18990139	201	-0.496864	0.0442974	0.255636	Swip-1
chr2L	10408212	10408412	201	-0.489931	0.0443468	0.255684	RpS27A
chr2R	14208525	14208725	201	-0.49262	0.0444916	0.256115	Sox15
chrX	11817817	11818017	201	-0.499502	0.0445148	0.256115	CG1578
chr2R	13132999	13133199	201	-0.496951	0.0448479	0.256507	CG13326
chr2R	6589641	6589841	201	-0.493328	0.0448626	0.256507	jing
chr3L	14194303	14194503	201	-0.499643	0.0448645	0.256507	nuf
chr2L	9938080	9938280	201	-0.493776	0.0448947	0.256507	CG4619
chr2R	17568379	17568579	201	-0.499818	0.0449025	0.256507	Ns2
chr3L	9020905	9021105	201	-0.492047	0.0449913	0.256606	Doc2
chr3L	12145559	12145759	201	-0.494877	0.0449997	0.256606	Nrx-IV
chr2R	5378998	5379198	201	0.492923	0.0450105	0.256606	NA
chr3R	28812007	28812207	201	-0.492867	0.0450284	0.256606	wdn
chr3L	4103495	4103695	201	-0.49358	0.0450633	0.256606	CG14995
chr3R	7530253	7530453	201	-0.492069	0.0450844	0.256606	alphaTub84D
chr3R	24252603	24252803	201	-0.499048	0.0450882	0.256606	beta-PheRS
chr2R	9979813	9980013	201	-0.493137	0.0452333	0.257239	eve
chr2L	9448275	9448475	201	-0.491789	0.0452989	0.257417	numb
chr3R	29765833	29766033	201	-0.491006	0.0453152	0.257417	kay
chr3R	29205117	29205317	201	-0.496197	0.0453641	0.257598	Mesh1
chr3L	15045212	15045412	201	-0.49881	0.0454411	0.257799	ind
chr3R	20846908	20847108	201	-0.495062	0.0454896	0.257799	CG15696
chr3R	8927607	8927807	201	-0.499179	0.045501	0.257799	pyd
chr2R	10813744	10813944	201	-0.493975	0.0455768	0.258086	CG7637
chr3R	15963768	15963968	201	-0.491612	0.0455858	0.258086	CG4287
chr3R	25637378	25637578	201	-0.498045	0.0457536	0.258366	jigr1
chr4	506816	507016	201	-0.494602	0.0457835	0.258386	zfh2
chr3R	23783781	23783981	201	-0.489857	0.0458254	0.258386	mbc
chr4	1254075	1254275	201	-0.493378	0.0458608	0.258386	FBgn0053653
chr3L	7290539	7290739	201	-0.497118	0.0458856	0.258386	unc-13-4A
chr2R	11219414	11219614	201	-0.496005	0.0458858	0.258386	CG9084
chr2L	18894896	18895096	201	-0.490788	0.0459454	0.258446	FBgn0265950
chr3R	11778821	11779021	201	-0.499922	0.0459543	0.258446	l(3)neo38
chr3R	8673369	8673569	201	-0.485533	0.0460025	0.258483	CG8036
chr2L	143178	143378	201	-0.49811	0.0460055	0.258483	CG11454
chr2R	15565699	15565899	201	-0.495672	0.0460714	0.258723	CG8195
chr3R	4806941	4807141	201	-0.496327	0.0461245	0.258739	ctrip
chrX	13739279	13739479	201	-0.496095	0.0461387	0.258739	Grip91
chr3L	19261293	19261493	201	-0.493769	0.04616	0.258739	nes
chr2L	12434423	12434623	201	-0.498247	0.0461604	0.258739	eRF3
chr4	458202	458402	201	-0.495354	0.046166	0.258739	FBgn0266619
chr3R	15921883	15922083	201	-0.499677	0.0461776	0.258739	Fbxl7
chr3L	13347504	13347704	201	-0.485768	0.046193	0.258739	CG17687
chr2R	6527911	6528111	201	-0.498778	0.0462247	0.258778	jing
chr2L	15007839	15008039	201	-0.492538	0.0462339	0.258778	NC2beta
chr2L	7633091	7633291	201	-0.496717	0.0463256	0.259028	FBgn0266034
chr3R	15274518	15274914	397	-0.49551	0.0463297	0.259028	Cp190
chr3R	20291133	20291333	201	-0.497439	0.0464168	0.259325	cic
chr3L	11696893	11697093	201	-0.494731	0.0464702	0.259478	Dph1
chr3L	7369732	7369932	201	-0.497057	0.0464842	0.259478	Sh3beta
chr3L	16051813	16052013	201	-0.498313	0.0464979	0.259478	Mbs
chr3L	7936003	7936203	201	-0.488495	0.0465282	0.259478	syd
chr2R	20494491	20494691	201	0.490036	0.0465301	0.259478	FBgn0265854
chrX	11125086	11125286	201	-0.499417	0.0465463	0.259478	Rpt3
chr3L	4555921	4556121	201	-0.498796	0.0465696	0.259513	CG33777
chr3R	18906453	18906653	201	-0.497989	0.0466101	0.259604	CG14292
chrX	6759365	6759565	201	-0.497903	0.0466261	0.259604	FBgn0263507
chr2R	4616708	4616908	201	-0.498005	0.0466371	0.259604	CG17486
chr3R	6254582	6254782	201	-0.498839	0.0466555	0.259612	Osi8
chr3L	8525783	8525983	201	-0.49209	0.046679	0.259648	foi
chr2R	24664094	24664476	383	-0.483799	0.0467251	0.259671	ND-19
chr2L	10426829	10427029	201	-0.489957	0.0467325	0.259671	CG5188
chr3L	2503505	2503705	201	-0.489938	0.0467668	0.259671	CG16758
chr2R	21720360	21720560	201	-0.490989	0.046777	0.259671	LBR
chr2L	16703152	16703352	201	-0.497114	0.0467786	0.259671	FBgn0263744
chr3L	6978550	6978750	201	-0.494489	0.0467855	0.259671	Galphai
chr2L	20075367	20075567	201	-0.48847	0.046811	0.259719	pr
chr2L	4576841	4577041	201	-0.489438	0.0468555	0.259871	dpy
chr3R	29153428	29153628	201	-0.49291	0.0469002	0.260024	Rpn2
chr2R	3504038	3504238	201	-0.491701	0.0469406	0.260121	NA
chr3L	18898967	18899167	201	-0.485951	0.0469612	0.260121	CG3902
chr3L	5565125	5565325	201	-0.497889	0.0469705	0.260121	ScsbetaG
chr3R	4608801	4609001	201	-0.497461	0.046986	0.260121	NA
chr3L	837762	837962	201	-0.493743	0.0470424	0.260252	CG13901
chrX	3396702	3396902	201	-0.498283	0.0470438	0.260252	CG12535
chr2R	19290260	19290460	201	-0.491701	0.0470842	0.260381	Fkbp12
chr3R	31786332	31786532	201	-0.493947	0.0471533	0.260574	faf
chr2R	15381716	15381916	201	-0.486588	0.0472431	0.260962	dup
chr2L	9497074	9497274	201	-0.495249	0.0472666	0.260962	Gdi
chr2R	11231891	11232091	201	-0.4972	0.0472845	0.260962	CG13228
chr3L	15815641	15815841	201	-0.497224	0.0473149	0.260962	CkIIalpha-i1
chr3L	9467861	9468061	201	-0.492325	0.0473162	0.260962	CG44838
chr3R	10145037	10145237	201	-0.486048	0.0473262	0.260962	TAF1B
chr3R	24112604	24112804	201	-0.488129	0.0473495	0.260996	CG13605
chr3L	1517745	1517945	201	-0.493187	0.0473726	0.261015	cue
chr2R	21367315	21367515	201	-0.487657	0.0473873	0.261015	cv-2
chrX	5689402	5689602	201	-0.497254	0.0474333	0.26105	cv
chrX	655725	655925	201	-0.49729	0.0474734	0.26105	SkpA
chr3R	15275121	15275321	201	-0.496347	0.047476	0.26105	Cp190
chr2R	9292621	9292821	201	-0.492114	0.0475045	0.26105	Mad1
chr3R	12980803	12981003	201	-0.490089	0.0475151	0.26105	Paip2
chr2L	490155	490355	201	-0.495373	0.0475161	0.26105	ush
chr3L	13134250	13134450	201	-0.496842	0.0475781	0.26105	CG33262
chr2L	8366197	8366397	201	-0.496647	0.0475786	0.26105	RpS13
chr2R	6481892	6482092	201	-0.497021	0.0475904	0.26105	NA
chr3R	20831063	20831263	201	-0.490754	0.0475947	0.26105	FBgn0027493
chr2R	20951536	20951736	201	-0.488646	0.0475992	0.26105	NA
chr3R	6657330	6657530	201	-0.49639	0.04766	0.261064	CG1307
chr3R	27559058	27559258	201	-0.495536	0.0476653	0.261064	Klp98A
chr2L	9970497	9970697	201	-0.483753	0.0476767	0.261064	NA
chr2L	10364357	10364557	201	-0.495317	0.047699	0.261064	Cand1
chr3L	9137681	9137881	201	-0.491764	0.0477053	0.261064	Use1
chr3R	14591462	14591662	201	-0.495538	0.0477216	0.261064	stumps
chr3L	1366960	1367160	201	-0.496719	0.0477468	0.261109	Ptp61F
chr2L	8162365	8162565	201	-0.493287	0.0478737	0.261437	PAPLA1
chr3R	28888327	28888527	201	-0.49602	0.047878	0.261437	CG33203
chr3R	16099387	16099587	201	-0.480935	0.0478993	0.261437	Akt1
chr3R	14346905	14347105	201	-0.487932	0.0479073	0.261437	NK7.1
chr2R	7512653	7512853	201	-0.495887	0.0479257	0.261437	az2
chr3R	5669228	5669428	201	-0.494823	0.0479633	0.261437	Xe7
chr3L	20493854	20494054	201	-0.492955	0.0479786	0.261437	ZnT77C
chr2L	18783846	18784046	201	-0.495701	0.0479892	0.261437	ham
chr2L	9992605	9992805	201	-0.491506	0.047993	0.261437	bib
chr2R	8226578	8226778	201	-0.490916	0.0479957	0.261437	FBgn0265302
chrX	5690636	5690836	201	-0.494319	0.0480618	0.261584	cv
chr3L	26016512	26016712	201	0.48989	0.0480966	0.261584	l(3)80Fg
chr3R	14741195	14741395	201	-0.482902	0.0480971	0.261584	eff
chr4	358195	358395	201	-0.485026	0.0481003	0.261584	Hcf
chr3L	5621195	5621395	201	-0.492392	0.0481096	0.261584	NA
chr3R	15994402	15994602	201	-0.495735	0.0481817	0.261796	srp
chr3L	21298787	21298987	201	-0.490506	0.0482357	0.261996	Edg78E
chrX	13159425	13159625	201	-0.495336	0.0482764	0.262109	Bap60
chr2R	12026808	12027008	201	-0.485376	0.0483025	0.262109	Mppe
chr3L	10686738	10686938	201	-0.492517	0.0483179	0.262109	simj
chr3L	9679064	9679264	201	-0.49539	0.0483326	0.262109	fry
chrY	2122498	2122698	201	-0.490402	0.0483573	0.262109	NA
chr2L	17382542	17382742	201	-0.49478	0.0483701	0.262109	CLIP-190
chr2R	16571156	16571356	201	-0.489314	0.0483867	0.262109	RpS15
chr2R	6627233	6627433	201	-0.49058	0.0483941	0.262109	CG33919
chr4	486618	486818	201	-0.492821	0.0484399	0.262191	Asator
chr2L	2889282	2889482	201	-0.494979	0.0485255	0.262267	lilli
chr3L	13924673	13924873	201	-0.490443	0.0485551	0.262267	Rgl
chr2R	17344463	17344663	201	0.490587	0.048566	0.262267	mbl
chr2R	24046733	24046933	201	-0.493339	0.0485743	0.262267	sei
chr3L	22741633	22741833	201	-0.494193	0.0485753	0.262267	l(3)04053
chr3R	7044080	7044280	201	-0.493289	0.0485782	0.262267	NA
chr3L	16401229	16401429	201	-0.486101	0.0486914	0.262395	CG44836
chrX	19849403	19849603	201	-0.494587	0.048705	0.262395	Nup205
chr3L	14189555	14189755	201	-0.484019	0.0487208	0.262395	nuf
chr2L	1958183	1958383	201	-0.492235	0.0487301	0.262395	erm
chr3L	11119809	11120009	201	-0.48251	0.0487365	0.262395	FoxK
chr2R	12344462	12344662	201	-0.488941	0.0487577	0.262395	CG8839
chr3R	21179665	21179865	201	-0.486478	0.048779	0.262395	SNF4Agamma
chr3L	9010628	9010828	201	-0.490955	0.0487842	0.262395	CG5194
chr3R	12439500	12439700	201	-0.484383	0.0487908	0.262395	CG17207
chr2L	1961019	1961219	201	-0.487506	0.0488024	0.262395	erm
chr3R	29062935	29063135	201	-0.488701	0.0488084	0.262395	Cul5
chr3L	9615455	9615655	201	-0.493883	0.0488735	0.262467	LanB2
chr3L	15136572	15136772	201	-0.4877	0.0488943	0.262486	CG12316
chr2R	24345023	24345223	201	-0.487664	0.0489561	0.262676	bs
chr2R	23554619	23554819	201	-0.481148	0.0489641	0.262676	pita
chr2R	9285003	9285203	201	-0.493063	0.0490237	0.262713	Pkn
chr3R	28887918	28888118	201	-0.493163	0.0490246	0.262713	CG33203
chr3L	21009826	21010026	201	-0.493122	0.0490253	0.262713	skd
chr3R	8233350	8233550	201	-0.484549	0.04904	0.262713	DNApol-iota
chr3L	1913561	1913761	201	-0.493457	0.0491087	0.262905	NA
chr3L	21154150	21154350	201	-0.489321	0.0491463	0.262905	Ac78C
chr2R	22608140	22608340	201	-0.493569	0.0491474	0.262905	CG4294
chr3L	14205239	14205439	201	-0.493189	0.0491629	0.262905	nuf
chr3R	25687066	25687266	201	-0.482687	0.0492026	0.262929	RpL27
chr2L	18895379	18895579	201	-0.486411	0.0492227	0.262929	FBgn0265950
chr3L	18106485	18106685	201	-0.490218	0.0492519	0.262929	CG13698
chr2L	16282303	16282503	201	-0.486531	0.0492528	0.262929	crp
chr3R	28844420	28844620	201	-0.485773	0.0492751	0.262956	Apc
chr2L	21108028	21108228	201	-0.489066	0.0493264	0.263012	Nhe2
chr3R	13646885	13647085	201	-0.492854	0.0493304	0.263012	rin
chr3R	5660659	5660859	201	-0.486943	0.0493373	0.263012	CG2182
chrX	758931	759131	201	-0.492442	0.049365	0.263067	CG5273
chr2L	8822388	8822588	201	-0.493048	0.0493842	0.263077	NA
chr2L	3152739	3152939	201	-0.492872	0.0494232	0.263116	Mad
chr2L	5724001	5724201	201	-0.484354	0.0494417	0.263116	CG11030
chr3R	3575926	3576126	201	-0.488163	0.0494615	0.263122	Parp
chr3R	7639490	7639690	201	-0.487392	0.0494915	0.26317	Nlg3
chr4	1008522	1008722	201	-0.483137	0.0495052	0.26317	NA
chr2R	20168711	20168911	201	-0.492261	0.0495669	0.263223	NA
chr2R	16110371	16110571	201	-0.492619	0.0495962	0.263223	Asph
chr3L	8449322	8449522	201	-0.487566	0.0496047	0.263223	Gug
chr2R	10259634	10259834	201	-0.492321	0.0496273	0.263223	CG12911
chr2L	14506824	14507024	201	-0.488481	0.0496329	0.263223	NA
chr2R	16294301	16294501	201	-0.492209	0.0496403	0.263223	CG7747
chr2R	18156277	18156477	201	-0.491239	0.0496417	0.263223	lolal
chr2R	18277327	18277527	201	-0.488524	0.0496533	0.263223	pen-2
chrX	14838997	14839197	201	-0.489868	0.0497667	0.263396	CG14407
chr3L	21832643	21832843	201	-0.491242	0.0497687	0.263396	Nopp140
chr3R	4437273	4437473	201	-0.485817	0.0497703	0.263396	CG9804
chr3L	22722646	22722846	201	-0.48488	0.0497813	0.263396	mael
chr2L	22140099	22140299	201	-0.489466	0.0498028	0.263396	CG42748
chr4	681568	681768	201	-0.4779	0.049807	0.263396	CG11360
chrX	17599475	17599675	201	-0.490654	0.0498897	0.263742	X11L
chr2L	2450801	2451001	201	-0.490662	0.0499212	0.263796	dpp
chr3L	8186877	8187077	201	-0.491088	0.0499477	0.263796	ERR
chr2R	2997151	2997351	201	-0.480842	0.0499517	0.263796	NA
chr2L	14972300	14972500	201	0.480779	0.0499874	0.263843	side-II
chr3R	11819223	11819423	201	-0.484652	0.0500111	0.263843	COX5A
chr2L	19701277	19701477	201	-0.482638	0.0500127	0.263843	Lar
chr3R	22362532	22362732	201	-0.487146	0.050042	0.263907	PSR
chr2R	18157283	18157483	201	-0.481557	0.0501807	0.264327	lolal
chr2R	4012682	4012882	201	-0.488618	0.0501822	0.264327	Haspin
chrX	3773236	3773436	201	-0.491263	0.0501933	0.264327	Tlk
chr2L	11065717	11065917	201	-0.489236	0.0501982	0.264327	Samuel
chr3R	8477170	8477370	201	-0.482979	0.0502108	0.264327	CG45263
chr2R	18627841	18628041	201	-0.491185	0.0502535	0.264327	Eip55E
chr2R	15869056	15869256	201	-0.486562	0.0502885	0.264327	Rif1
chr3L	11939631	11939831	201	-0.485533	0.0503153	0.264327	Rpt4R
chr3R	7750023	7750223	201	-0.489682	0.0503252	0.264327	pyd3
chr3L	3071783	3071983	201	-0.481757	0.0503317	0.264327	PAN3
chrX	4938013	4938213	201	-0.490895	0.0503489	0.264327	Ptp4E
chr3L	20004562	20004762	201	-0.487924	0.0503634	0.264327	CG7668
chr3R	18261560	18261760	201	-0.483321	0.0503854	0.264327	NA
chr3R	29034491	29034691	201	-0.485961	0.0503926	0.264327	Cpsf100
chr2L	13191860	13192060	201	-0.489827	0.0503993	0.264327	CG16974
chr3R	24221888	24222088	201	-0.487035	0.0504316	0.264372	twin
chr3R	20822050	20822250	201	-0.483171	0.0504424	0.264372	RpS20
chr3L	4108360	4108560	201	-0.481482	0.0504658	0.264403	Ack
chr3R	30809609	30809809	201	-0.489229	0.0505163	0.264577	wts
chr3L	21568752	21568952	201	-0.488259	0.0505856	0.264849	CRIF
chr3L	22724430	22724630	201	-0.489703	0.0506484	0.265087	mael
chr2R	9846418	9846618	201	-0.488201	0.0506669	0.265092	Orc6
chr3L	23265416	23265616	201	-0.485885	0.0507405	0.265386	nAChRalpha4
chr2L	13835481	13835681	201	-0.488374	0.0507632	0.265407	DNApol-gamma35
chr2R	11296971	11297171	201	-0.484728	0.0507793	0.265407	CG18336
chr2L	1973186	1973386	201	-0.487274	0.0508261	0.265482	erm
chr3R	14680062	14680262	201	-0.489829	0.0508391	0.265482	Meltrin
chr3R	17617265	17617465	201	-0.48266	0.0508857	0.265482	FBgn0011944
chr3L	1795482	1795682	201	-0.488208	0.0508897	0.265482	Cdc37
chr3R	5057339	5057539	201	-0.488566	0.0509097	0.265482	NA
chr2L	10976272	10976472	201	-0.483742	0.050923	0.265482	abo
chr2R	21359621	21359821	201	-0.484907	0.0509253	0.265482	cv-2
chr3R	5588251	5588451	201	-0.485261	0.0509442	0.265482	CG2926
chr3L	1295757	1295957	201	-0.486481	0.0509628	0.265482	scf
chr3L	2712662	2712862	201	-0.489238	0.0509765	0.265482	Fife
chr3R	5720811	5721011	201	-0.489331	0.0509853	0.265482	NA
chr2R	6971140	6971340	201	-0.488009	0.0510077	0.265499	mim
chr2R	14480715	14480915	201	-0.478428	0.0510244	0.265499	PRAS40
chrX	16297092	16297292	201	-0.489344	0.0510912	0.265499	CG9911
chr3L	14452653	14452853	201	-0.48562	0.0510931	0.265499	bbg
chr3R	14036128	14036328	201	-0.483605	0.0510997	0.265499	CG9922
chr3L	19687335	19687535	201	-0.489341	0.0511017	0.265499	Gbeta76C
chr2L	18484386	18484586	201	-0.487785	0.0511279	0.265499	CG10283
chr3L	20356693	20356893	201	-0.486407	0.0512046	0.265641	kin17
chrX	6224468	6224668	201	-0.482911	0.0512202	0.265641	sqh
chr2R	23697752	23697952	201	-0.489057	0.051225	0.265641	mRpL43
chrX	16598410	16598610	201	-0.48892	0.0512846	0.265641	CG9784
chr2L	19717628	19717828	201	-0.479164	0.0513014	0.265641	Lar
chr3L	13965106	13965306	201	-0.487785	0.0513331	0.265641	Meics
chr2L	23174649	23174849	201	-0.488766	0.0513386	0.265641	CG12567
chr3R	10868449	10868811	363	-0.482396	0.0513438	0.265641	Tsp86D
chr2R	24057088	24057288	201	-0.488768	0.0513674	0.265641	ppk29
chr2R	19424819	19425019	201	-0.476992	0.0513685	0.265641	CalpA
chr3R	15919680	15919880	201	-0.4885	0.0513915	0.265641	Fbxl7
chr3R	5127997	5128197	201	-0.482698	0.051402	0.265641	CG12007
chr2L	13225363	13225563	201	-0.482005	0.0514192	0.265641	Ski6
chrX	583999	584199	201	-0.486844	0.051434	0.265641	vnd
chr3L	21569133	21569333	201	-0.47773	0.0514743	0.265759	CRIF
chr2R	13861848	13862048	201	-0.485971	0.0515373	0.265994	CG16935
chr3R	15281362	15281562	201	-0.487362	0.05161	0.266274	Tm1
chr2R	13569791	13569991	201	-0.488095	0.0516264	0.266274	NA
chrX	9109904	9110104	201	-0.483786	0.0517321	0.266728	AP-1gamma
chr2L	4820470	4820670	201	-0.486852	0.051801	0.266894	CG3225
chr2L	8740589	8740789	201	-0.480414	0.0518045	0.266894	raw
chr3L	16570697	16570897	201	-0.486654	0.0518246	0.266894	Mipp1
chr3R	16049579	16049779	201	-0.48339	0.0518517	0.266894	FBgn0024222
chr2L	6622705	6622905	201	-0.483394	0.0519017	0.267061	DIP-iota
chr3L	8460797	8460997	201	-0.478706	0.0519267	0.267099	Gug
chr3L	11491736	11491936	201	-0.480718	0.0519657	0.267114	chrb
chr3R	16719866	16720066	201	-0.4851	0.0519885	0.267114	Ubx
chr3R	31329695	31329895	201	-0.474264	0.052054	0.267114	CG34347
chr3R	21017564	21017764	201	-0.485046	0.0520549	0.267114	Rlip
chr2R	6612864	6613064	201	-0.478768	0.0520734	0.267114	jing
chr2L	8544033	8544233	201	-0.487144	0.0521095	0.267114	Sema1a
chr3L	6756401	6756601	201	-0.484356	0.0521213	0.267114	Ist1
chr3L	12610386	12610586	201	-0.482295	0.0521378	0.267114	caup
chr3R	20574708	20574908	201	-0.485871	0.0521439	0.267114	CG5412
chr3L	2774240	2774440	201	-0.474722	0.052153	0.267114	AhcyL1
chr3L	20186587	20186787	201	-0.483063	0.0521566	0.267114	Ssk
chr3L	15563617	15563817	201	-0.483786	0.0521651	0.267114	CG7739
chr2R	23646043	23646243	201	-0.479199	0.052175	0.267114	retn
chr2L	91547	91747	201	-0.486282	0.0522597	0.267383	Zir
chr2L	19444932	19445132	201	-0.484551	0.0522826	0.267383	RanGAP
chr2R	13560495	13560695	201	-0.477409	0.0523247	0.267383	CG13334
chr4	56382	56582	201	-0.48676	0.0523248	0.267383	ci
chr3L	3452502	3452702	201	-0.483788	0.0523327	0.267383	eIF5B
chr2L	19162543	19162743	201	-0.4836	0.0524059	0.267583	brat
chr3L	7143401	7143601	201	-0.486	0.052407	0.267583	corn
chr3L	324627	324827	201	-0.478832	0.052442	0.267672	CG32344
chr2R	20870665	20870865	201	-0.484753	0.0524822	0.267682	IM4
chr3R	14894416	14894616	201	-0.481289	0.0524851	0.267682	CG7265
chr2R	12211116	12211316	201	-0.481998	0.0524966	0.267682	Sr-CII
chr4	976004	976204	201	-0.485593	0.0525462	0.267756	fuss
chr3L	13245398	13245598	201	0.486002	0.052549	0.267756	caps
chr2L	9567649	9567849	201	-0.484652	0.0525673	0.267756	jp
chr3L	9072622	9072822	201	-0.478022	0.0525928	0.267756	teq
chr3L	1794741	1794941	201	-0.486153	0.0526064	0.267756	Cdc37
chr2R	7940546	7940746	201	-0.479951	0.0526189	0.267756	CG8728
chr3R	17533998	17534198	201	-0.474887	0.0526421	0.267756	CG5823
chr3R	15243574	15243774	201	-0.484746	0.0526517	0.267756	tefu
chr4	507709	507909	201	-0.47724	0.0526889	0.267809	zfh2
chrY	2735439	2735639	201	-0.480048	0.0527223	0.267831	NA
chr3L	21031708	21031908	201	-0.485134	0.0527532	0.267831	siz
chr3L	11815324	11815524	201	-0.484865	0.0527543	0.267831	CG14130
chr3L	8891515	8891715	201	-0.484632	0.0527771	0.267858	Mcm7
chr2R	12435951	12436151	201	-0.484264	0.0528223	0.26788	DUBAI
chr3L	8829577	8829777	201	-0.48261	0.0528231	0.26788	dally
chr3L	6174134	6174334	201	-0.475842	0.0528839	0.268034	fmt
chrX	10728548	10728748	201	-0.484648	0.0529439	0.268168	stx
chr3L	10308043	10308243	201	-0.484595	0.0529647	0.268184	FBgn0267665
chr3R	2630198	2630398	201	-0.474277	0.0529967	0.268257	Pzl
chr2R	7972431	7972631	201	-0.484735	0.0530222	0.268297	CSN4
chr3R	21376830	21377030	201	-0.483823	0.053107	0.268478	mod(mdg4)
chr2L	19702598	19702798	201	-0.476071	0.0531107	0.268478	Lar
chrX	494798	494998	201	-0.482207	0.0531734	0.268547	svr
chr3L	3787239	3787439	201	-0.482765	0.0531751	0.268547	CG32264
chr3R	27706712	27706912	201	-0.477135	0.0532017	0.268547	CROT
chr2R	9875108	9875308	201	-0.481824	0.0532276	0.268547	CG12744
chrX	8561524	8561724	201	-0.48426	0.0532869	0.268745	IntS4
chrX	16640339	16640539	201	-0.480783	0.0533608	0.268942	Rok
chr3L	708151	708351	201	-0.484593	0.0533613	0.268942	CG13895
chr2R	12530841	12531041	201	-0.480558	0.0533836	0.268965	fra
chrX	6857769	6857969	201	-0.484446	0.0534182	0.268972	CG14434
chr3R	18255415	18255615	201	-0.479287	0.0534202	0.268972	CG12320
chr3R	9573864	9574064	201	-0.48084	0.05346	0.268994	CG9396
chr2L	19045263	19045463	201	-0.478044	0.05346	0.268994	Ttc19
chr3R	10617733	10617933	201	-0.484131	0.053536	0.269288	hth
chr3L	4167430	4167630	201	-0.484053	0.0535565	0.269302	mas
chr3R	31213326	31213526	201	-0.479287	0.0535812	0.269337	CG1542
chr4	138993	139193	201	-0.480122	0.053641	0.269549	anne
chr2R	15569346	15569546	201	-0.480046	0.0537956	0.269925	Cdk5
chr2L	9993222	9993422	201	-0.475718	0.0538116	0.269925	bib
chr2R	6810906	6811106	201	-0.471303	0.0538228	0.269925	ubl
chr2L	4906672	4906872	201	-0.47831	0.0538507	0.269925	snsl
chr3R	7911672	7911872	201	-0.474456	0.0538576	0.269925	Prat
chr3L	9358391	9358591	201	-0.48257	0.0538957	0.269925	UGP
chr2R	12756323	12756523	201	-0.480958	0.0539011	0.269925	Dgkepsilon
chr3R	16850015	16850215	201	-0.48337	0.0539334	0.269925	FBgn0020546
chr3L	19908316	19908516	201	-0.479198	0.0539453	0.269925	Su(Tpl)
chr3R	8931809	8932009	201	-0.482926	0.0539511	0.269925	pyd
chrX	12909518	12909718	201	-0.482255	0.0539922	0.269925	Brms1
chr3L	18665685	18665885	201	-0.482444	0.0540125	0.269925	MYPT-75D
chr3R	16453315	16453515	201	-0.473759	0.0540314	0.269925	CG10405
chrX	19786205	19786405	201	-0.482918	0.0540423	0.269925	zld
chrX	12574958	12575158	201	-0.483123	0.0540523	0.269925	Pits
chr3R	14679741	14679941	201	-0.481538	0.0540524	0.269925	Meltrin
chr3R	8251601	8251801	201	-0.477053	0.0540742	0.269946	mtg
chr3R	10170382	10170582	201	-0.482188	0.0541433	0.269993	Best1
chr3R	7105525	7105725	201	-0.4829	0.0541652	0.269993	Alh
chr2R	9590738	9590938	201	-0.482512	0.0541696	0.269993	Map60
chr2L	11973313	11973513	201	-0.481217	0.0541723	0.269993	FBgn0263019
chr2R	17479044	17479244	201	-0.480699	0.0541899	0.269993	insb
chr3R	25472086	25472286	201	-0.481193	0.0542769	0.270209	Fur1
chr2L	14489142	14489342	201	-0.482334	0.054419	0.270692	noc
chr4	399473	399673	201	-0.480735	0.0544915	0.270698	NA
chrX	2172408	2172608	201	-0.481043	0.0544968	0.270698	ND-B14.5A
chr3L	17407200	17407400	201	-0.481183	0.0545083	0.270698	blot
chr2L	6677512	6677712	201	-0.477801	0.0545091	0.270698	cort
chr2R	4013379	4013579	201	-0.481576	0.0545393	0.270747	Haspin
chr3L	11789131	11789331	201	-0.481577	0.054565	0.270747	Pi3K68D
chr3R	13715769	13715969	201	-0.474442	0.0545775	0.270747	FBgn0054044
chr2L	9613246	9613446	201	-0.48117	0.0546015	0.270747	Trx-2
chr2R	9414211	9414411	201	-0.481703	0.0546417	0.270747	wun
chr2L	12466673	12466873	201	-0.479928	0.0546432	0.270747	bun
chr3R	26059373	26059573	201	-0.480499	0.0546809	0.270845	Sld5
chr3R	28811266	28811466	201	-0.475444	0.054703	0.270867	wdn
chr3R	15988404	15988604	201	-0.478495	0.0547314	0.27092	srp
chr3L	16844889	16845089	201	-0.470388	0.0547927	0.271004	kud
chr2R	21293074	21293274	201	-0.473039	0.0548197	0.271004	RpL29
chr2R	10142239	10142439	201	-0.481054	0.0548221	0.271004	CG18011
chr3R	5483826	5484026	201	-0.479857	0.0548356	0.271004	ksr
chr2L	4821223	4821423	201	-0.478613	0.054841	0.271004	CG3225
chr2L	18485286	18485486	201	-0.480806	0.0548551	0.271004	CG10283
chrX	17507507	17507707	201	-0.481453	0.0549013	0.271144	CG43658
chr3R	21638582	21638782	201	-0.476088	0.0549263	0.271152	E2f1
chr3R	1444921	1445121	201	-0.474911	0.0549468	0.271152	Myo81F
chr3R	10433553	10433753	201	-0.480585	0.0549757	0.271152	Cyp12e1
chr3L	14624867	14625067	201	-0.480756	0.0550151	0.271152	CG9628
chr3R	12691646	12691846	201	-0.478325	0.0550307	0.271152	kar
chr2R	7278494	7278694	201	-0.479373	0.0550395	0.271152	Br140
chr3L	12533630	12533830	201	-0.472992	0.0550731	0.271152	Tsf2
chr3R	25181479	25181679	201	-0.477751	0.0550856	0.271152	dan
chr3R	16766128	16766328	201	-0.475755	0.0551104	0.271152	FBgn0020556
chr2R	17502063	17502263	201	-0.477746	0.0551194	0.271152	nw
chr3L	270884	271084	201	-0.480198	0.0551499	0.271152	miple2
chr3R	23669957	23670157	201	-0.477309	0.0551796	0.271152	CG31145
chr2L	7310304	7310504	201	-0.475877	0.055183	0.271152	wg
chr3L	17798179	17798379	201	-0.47434	0.0551875	0.271152	NUCB1
chr3L	8986600	8986800	201	-0.478797	0.0552235	0.271164	CG5068
chr3L	25553875	25554075	201	0.477896	0.0552349	0.271164	lovit
chr3R	31669932	31670132	201	-0.472784	0.0552434	0.271164	CG1815
chr2L	2366113	2366313	201	-0.475046	0.0552718	0.271216	Rab5
chr3R	13673290	13673490	201	-0.474385	0.0553399	0.271463	Task6
chr3L	14758848	14759048	201	-0.474344	0.0554286	0.271811	Trl
chr3L	5952318	5952518	201	-0.472226	0.0554527	0.271841	CG33993
chr3L	19557902	19558102	201	-0.476175	0.0555014	0.271931	FBgn0265888
chr3L	20405536	20405736	201	-0.479504	0.0555208	0.271931	FBgn0267635
chr3R	27253345	27253545	201	-0.478495	0.0556119	0.271931	pll
chr3R	21654300	21654500	201	-0.479524	0.055612	0.271931	E2f1
chr3R	5824443	5824643	201	-0.479907	0.0556539	0.271931	Sec20
chr2R	18309076	18309276	201	-0.464979	0.0556564	0.271931	Tango8
chr3L	2882406	2882606	201	-0.476555	0.0556777	0.271931	FBgn0265724
chr3L	184530	184730	201	-0.469496	0.055678	0.271931	Mtch
chr3L	540534	540734	201	-0.477501	0.0557138	0.271931	klar
chr2R	23925077	23925277	201	-0.478297	0.0557298	0.271931	CG2812
chr3L	6964645	6964845	201	-0.479142	0.0557341	0.271931	sgl
chr2L	21558269	21558469	201	-0.472289	0.0557411	0.271931	NA
chr3R	16050682	16050882	201	-0.47963	0.0557454	0.271931	FBgn0024222
chr2L	4818186	4818386	201	-0.475116	0.0557989	0.271931	CG3225
chrX	16683516	16683716	201	-0.479529	0.0558254	0.271931	Axs
chr3R	23694693	23694893	201	-0.479181	0.0558358	0.271931	CG10254
chr4	697546	697746	201	-0.465769	0.0558436	0.271931	ey
chr3L	16860697	16860897	201	-0.476683	0.0558547	0.271931	Rh4
chr2R	7387005	7387205	201	-0.479233	0.0558648	0.271931	cos
chr2R	2771102	2771302	201	-0.475774	0.0558826	0.271931	CG41378
chr3R	28844178	28844378	201	-0.476229	0.0558966	0.271931	Apc
chr2R	7187143	7187343	201	-0.479284	0.0559372	0.271931	pk
chr3R	26052189	26052389	201	-0.479326	0.0559481	0.271931	Vps2
chr3L	8653630	8653830	201	-0.473496	0.0559542	0.271931	NA
chr3L	1545973	1546173	201	-0.477605	0.0559599	0.271931	Pcyt1
chr2L	8364507	8364707	201	-0.475628	0.0560194	0.271949	RpS13
chr3R	11214458	11214658	201	-0.474014	0.0560413	0.271949	ZnT86D
chr3L	8603879	8604264	386	-0.478029	0.0560477	0.271949	CG5989
chr3L	22878080	22878280	201	-0.479009	0.0561026	0.271998	Ssl1
chr2R	18134099	18134299	201	-0.474979	0.0561092	0.271998	Hsf
chrX	15734159	15734359	201	-0.475347	0.0561306	0.272015	MagR
chr2L	10204206	10204406	201	-0.473371	0.0561727	0.272081	CG34159
chr3L	10851523	10851723	201	-0.478571	0.0562043	0.272081	tna
chr3R	5125868	5126068	201	-0.478813	0.0562079	0.272081	CG12007
chrX	11713783	11713983	201	-0.478397	0.0562751	0.272282	Amun
chr3R	29806664	29806864	201	-0.478317	0.0564161	0.27271	ca
chr3L	5974480	5974680	201	-0.475156	0.0564173	0.27271	CG10479
chr3L	12750018	12750218	201	-0.46792	0.0564942	0.272919	Klc
chr2R	17698961	17699161	201	-0.470214	0.0565507	0.272919	rdgBbeta
chr3L	697609	697809	201	-0.477338	0.0565654	0.272919	CG13894
chr2R	13900779	13900979	201	-0.472582	0.0565785	0.272919	shot
chr3R	15583524	15583724	201	-0.471088	0.0565785	0.272919	NA
chr3R	10048671	10048871	201	-0.474594	0.0565824	0.272919	CG12811
chr2R	17498902	17499102	201	-0.477795	0.0565945	0.272919	NA
chr2R	21547152	21547352	201	-0.467344	0.0566047	0.272919	Egfr
chr3L	3192395	3192595	201	-0.469373	0.0566215	0.272919	Hsp83
chr2R	7623083	7623283	201	-0.47298	0.056831	0.273569	CG1358
chr3L	2599498	2599698	201	-0.477438	0.0568397	0.273569	CG12182
chr3L	16087397	16087597	201	-0.476594	0.0568624	0.273569	ClC-c
chr2R	23204612	23204812	201	-0.472769	0.0568944	0.273569	side-V
chr3L	14613335	14613535	201	-0.475309	0.0569087	0.273569	shd
chr2L	7299484	7299684	201	-0.468744	0.0569158	0.273569	NA
chr2L	2759528	2759728	201	-0.474005	0.0569164	0.273569	HemK2
chr2L	7290498	7290698	201	-0.476597	0.0569181	0.273569	NA
chr2L	9988234	9988434	201	-0.476711	0.0569831	0.273788	bib
chr2L	7218190	7218390	201	-0.473578	0.0570085	0.273788	CG13784
chr3L	19042745	19042945	201	-0.473711	0.0570203	0.273788	nkd
chr3R	8089604	8089804	201	0.47561	0.0570353	0.273788	FBgn0265418
chr3R	22527749	22527949	201	-0.475873	0.0571113	0.273954	CG5346
chr3L	24536548	24536748	201	-0.475349	0.0571318	0.273954	mRpS5
chr2R	13991063	13991263	201	-0.476255	0.0571413	0.273954	mam
chr2R	6196223	6196423	201	-0.475774	0.057164	0.273954	Ptr
chr3R	8340910	8341110	201	-0.468187	0.0571953	0.273954	Arl2
chr2R	8129624	8129824	201	-0.475912	0.0572265	0.273954	Pabp2
chr3R	19332690	19332890	201	0.464149	0.0572327	0.273954	NA
chr2R	20991730	20991930	201	-0.476785	0.0572544	0.273954	CG3216
chr3L	25108829	25109029	201	-0.476255	0.0572755	0.273954	Set1
chr3L	5277138	5277338	201	-0.473355	0.0572857	0.273954	shep
chr2R	10899029	10899229	201	-0.473013	0.0573335	0.274097	ND-B14
chr2R	20994236	20994436	201	-0.472411	0.0573807	0.274236	dgt3
chr2R	6663470	6663670	201	-0.475038	0.057432	0.274273	Dpit47
chrX	18801282	18801482	201	-0.475668	0.0574432	0.274273	S6KL
chr2L	12719248	12719448	201	0.462371	0.0574723	0.274273	Pih1D1
chr4	1032978	1033178	201	-0.468594	0.0574825	0.274273	ATPsynbeta
chr3L	27341623	27341823	201	-0.473772	0.0574883	0.274273	Dbp80
chr3L	755099	755299	201	-0.465614	0.057514	0.274273	hng3
chr3R	15250380	15250580	201	-0.473732	0.0575243	0.274273	Amt
chr3L	263996	264196	201	-0.463702	0.0575324	0.274273	Tudor-SN
chr2L	9947352	9947552	201	-0.473204	0.0575843	0.274435	CG5853
chr3L	1350496	1350696	201	-0.464974	0.0576691	0.274753	312
chr3R	3319605	3319805	201	0.473611	0.0577039	0.274833	NA
chr2R	21034699	21034899	201	-0.464611	0.0577353	0.274897	NA
chr3L	20432297	20432497	201	-0.472891	0.0578377	0.275196	Las
chr2R	9841817	9842017	201	-0.463415	0.0578589	0.275196	Lsm11
chr2L	18158590	18158790	201	-0.46647	0.0578632	0.275196	JMJD4
chrX	1899832	1900032	201	-0.472793	0.0578704	0.275196	arm
chr3L	9855186	9855386	201	-0.460562	0.0579115	0.275261	RasGAP1
chr3L	3460469	3460669	201	-0.475488	0.0579203	0.275261	eIF5B
chr3L	18625846	18626046	201	-0.472608	0.0579562	0.275346	MYPT-75D
chr2L	20060879	20061079	201	-0.471963	0.0580322	0.275621	barr
chr2L	21052012	21052212	201	-0.472186	0.0580946	0.275753	Itgbn
chr3L	11938847	11939047	201	-0.466069	0.05814	0.275753	Rpt4R
chr3R	29749127	29749327	201	-0.472539	0.0581412	0.275753	ATPsyngamma
chrX	15844063	15844263	201	-0.473929	0.0581501	0.275753	ArgRS
chr3L	1461920	1462120	201	-0.469447	0.0581504	0.275753	rho
chr2L	8209391	8209591	201	-0.472121	0.0582108	0.275887	Ssb-c31a
chr3L	139448	139648	201	-0.465578	0.0582225	0.275887	Pdk1
chr3L	19791026	19791226	201	-0.466666	0.0582487	0.275887	SREBP
chr3R	19464012	19464212	201	-0.473662	0.0582632	0.275887	Scsalpha2
chr2L	16323622	16323822	201	-0.474147	0.0582925	0.275887	cact
chr3L	12850036	12850236	201	-0.470632	0.0583131	0.275887	CG10948
chr3R	6008485	6008685	201	-0.470876	0.058321	0.275887	Rm62
chr2R	9960098	9960298	201	-0.469504	0.0583234	0.275887	Mef2
chr2L	9984056	9984256	201	-0.4673	0.0583838	0.27595	bib
chr2R	8665347	8665547	201	-0.467162	0.0583898	0.27595	Acsl
chr2L	23397148	23397348	201	0.474256	0.058391	0.27595	NA
chr3R	31042327	31042527	201	-0.465281	0.058475	0.276173	CanA1
chr2L	20798372	20798572	201	-0.46908	0.0584881	0.276173	CG9328
chr3L	25413029	25413229	201	-0.470948	0.0585108	0.276173	lovit
chrY	1191221	1191421	201	-0.474264	0.0585674	0.276213	NA
chrX	10595996	10596196	201	-0.473849	0.0585697	0.276213	Hmr
chr2L	1439760	1439960	201	-0.470458	0.0585845	0.276213	CG43402
chr3R	30004827	30005027	201	-0.471177	0.0585917	0.276213	Nlp
chr3R	13638939	13639139	201	-0.468305	0.0586448	0.276328	sqd
chrX	19631430	19631630	201	-0.472965	0.0586781	0.276328	e(y)3
chr3R	20622611	20622811	201	-0.46751	0.0586815	0.276328	H
chr3R	25482448	25482648	201	-0.469969	0.0587013	0.276328	XNP
chr2R	15680016	15680216	201	-0.472455	0.0587068	0.276328	CG8207
chr3R	14773168	14773368	201	-0.466887	0.0587306	0.276355	jvl
chr2R	4516462	4516662	201	-0.473883	0.0587653	0.276433	RpL38
chr3L	18792883	18793083	201	-0.467535	0.058796	0.276492	ftz-f1
chr2L	5052675	5052875	201	-0.47321	0.0588988	0.27689	His3.3B
chr3R	10413176	10413376	201	-0.461716	0.0589489	0.276924	Irp-1B
chr2R	14618017	14618217	201	-0.471749	0.0589596	0.276924	Sec61beta
chr4	695545	695745	201	-0.473362	0.0589904	0.276924	ey
chrX	796496	796696	201	-0.472065	0.0589908	0.276924	CG16989
chr3L	18205359	18205559	201	-0.468061	0.0589969	0.276924	NA
chr4	308829	309029	201	-0.473198	0.059097	0.277308	Rad23
chr2L	12081246	12081446	201	-0.472715	0.0591806	0.277462	FBgn0265801
chr2L	8521966	8522166	201	-0.470262	0.059181	0.277462	Acer
chr2R	8061099	8061299	201	-0.472248	0.0591995	0.277462	CG12769
chr2L	15728859	15729059	201	-0.473031	0.0592025	0.277462	CycE
chr2L	21558557	21558757	201	-0.461483	0.0592991	0.2778	NA
chr3R	7116617	7116817	201	-0.457457	0.0593239	0.2778	Mlp84B
chr2R	22936950	22937150	201	-0.468598	0.0593294	0.2778	CG3788
chr2L	22981667	22981867	201	-0.472713	0.0593496	0.27781	cta
chr3L	4645685	4645885	201	-0.468582	0.0593723	0.27783	TTLL1B
chr3L	1302956	1303156	201	-0.460042	0.0594049	0.277854	Rac1
chr3L	11254048	11254248	201	-0.471663	0.0594159	0.277854	scyl
chr2L	17752530	17752730	201	-0.467935	0.0594503	0.277854	CadN
chr3R	24654726	24654926	201	-0.472298	0.0595003	0.277854	CG6695
chr3R	8264877	8265077	201	-0.47064	0.0595126	0.277854	RpA-70
chr2L	17286994	17287194	201	0.462347	0.0595185	0.277854	CG15140
chr3R	13293406	13293606	201	-0.465119	0.0595454	0.277854	wntD
chr2R	9406666	9406866	201	-0.472167	0.0596046	0.277854	wun
chr3R	26055341	26055541	201	-0.471845	0.0596184	0.277854	Dak1
chr2L	294569	294769	201	-0.462381	0.0596189	0.277854	U2af38
chr2R	25099602	25099802	201	-0.471879	0.0596465	0.277854	lov
chr3R	9034110	9034310	201	-0.471849	0.0596509	0.277854	neur
chr3R	30041109	30041309	201	-0.470675	0.0596763	0.277854	janA
chr2R	20245574	20245774	201	-0.465558	0.0596784	0.277854	Hacl
chr2L	11344053	11344253	201	-0.470586	0.0596832	0.277854	CG14926
chrX	656272	656472	201	-0.471922	0.059687	0.277854	SkpA
chrX	20391310	20391510	201	-0.471794	0.0596873	0.277854	l(1)G0004
chr3R	11948648	11948848	201	-0.466642	0.0597418	0.278023	Cad87A
chr3R	8726772	8726972	201	-0.468756	0.0598022	0.278119	CG8159
chr2L	20590	20790	201	-0.458844	0.0598106	0.278119	l(2)gl
chr2L	12174851	12175051	201	-0.465684	0.0598172	0.278119	bru1
chr3L	25115910	25116110	201	-0.471676	0.0598456	0.278166	MED21
chr3R	11882684	11882884	201	-0.461695	0.0598853	0.278266	CG6962
chr2L	4820771	4820971	201	-0.469409	0.0599938	0.278322	CG3225
chr3R	13382704	13382904	201	-0.471447	0.0600082	0.278322	CG9813
chr4	68669	68869	201	-0.469941	0.0600197	0.278322	RpS3A
chr3R	17043072	17043272	201	-0.465672	0.060029	0.278322	CG18213
chr3R	31736883	31737083	201	-0.464524	0.0600323	0.278322	eEF1alpha2
chrX	10823428	10823628	201	-0.469912	0.0600451	0.278322	FBgn0267184
chr2R	10478487	10478687	201	-0.47061	0.0600503	0.278322	CG17765
chrX	5340065	5340265	201	-0.471041	0.060134	0.278572	SK
chr3R	18745898	18746098	201	-0.464088	0.0602071	0.278826	Mekk1
chr2L	9954081	9954281	201	-0.4707	0.0602581	0.278906	CG13126
chr3L	19909354	19909554	201	-0.466099	0.0602609	0.278906	Su(Tpl)
chr3L	16228652	16228852	201	-0.46614	0.0602977	0.278923	CG5027
chr2R	11597828	11598028	201	-0.467635	0.0603013	0.278923	tou
chr2R	20536384	20536584	201	-0.463444	0.060321	0.27893	CG13423
chr3R	23767365	23767565	201	-0.467831	0.0603942	0.279183	CG10214
chr2R	22483188	22483388	201	-0.465998	0.0604824	0.279465	CG4554
chr2R	14312486	14312686	201	-0.46888	0.0604917	0.279465	Shrm
chrX	5679916	5680116	201	-0.469151	0.0605387	0.279597	FBgn0003747
chr3L	6256587	6256787	201	-0.465295	0.0605922	0.279708	Best2
chr3L	5542648	5542848	201	0.464324	0.0606295	0.279708	frm
chr2R	20327998	20328198	201	-0.46922	0.0606459	0.279708	MED8
chr3L	2590649	2590849	201	-0.469942	0.0606545	0.279708	dos
chr2R	19481209	19481409	201	-0.466077	0.0607227	0.279938	par-1
chr2R	19682499	19682699	201	-0.466097	0.0607743	0.280091	CG15127
chr3L	1334478	1334678	201	-0.46993	0.0608638	0.280345	l(3)02640
chr3R	5659333	5659533	201	-0.465487	0.0608995	0.280345	CG2182
chr3L	18822752	18822952	201	-0.469684	0.0609063	0.280345	Cat
chr3R	5648321	5648521	201	-0.465795	0.0609136	0.280345	MTA1-like
chr3L	17051132	17051332	201	-0.469415	0.0609446	0.280345	rogdi
chr2R	8724130	8724330	201	-0.465136	0.0609955	0.280345	gcl
chrX	8407199	8407399	201	-0.46922	0.0610331	0.280345	PIG-T
chr3R	5685717	5685917	201	-0.46751	0.0610518	0.280345	Rab23
chr3R	25075699	25075899	201	-0.46862	0.0610817	0.280345	shams
chrX	15712725	15712925	201	-0.468332	0.0610915	0.280345	CG9281
chr2R	1763721	1763921	201	-0.469409	0.0610985	0.280345	CG41520
chr3R	10222569	10222769	201	-0.469279	0.0611185	0.280345	CG12420
chr3R	9577917	9578117	201	-0.465428	0.0611273	0.280345	Kap-alpha3
chr2R	11232876	11233076	201	-0.466768	0.0611394	0.280345	CG13218
chr3L	786331	786531	201	-0.469278	0.0611928	0.280345	NA
chr3L	5135859	5136059	201	-0.460089	0.0612484	0.280345	CG4611
chr3R	28891740	28891940	201	-0.469191	0.0612559	0.280345	Doa
chr3R	11353107	11353307	201	-0.469111	0.0612918	0.280345	pros
chr2R	10465742	10465942	201	-0.466689	0.061315	0.280345	CG11777
chr3R	29667288	29667488	201	-0.461757	0.0613155	0.280345	ppk20
chr3L	12081770	12081970	201	-0.467722	0.0613226	0.280345	Sema5c
chr3L	4627114	4627314	201	-0.469038	0.0613297	0.280345	HDAC1
chr3L	1803012	1803212	201	-0.468138	0.0613387	0.280345	JTBR
chr3R	14903978	14904178	201	-0.465718	0.0613796	0.280345	VhaPPA1-1
chr2L	13247280	13247480	201	-0.4673	0.0613865	0.280345	CG16820
chr2R	6462945	6463145	201	-0.462234	0.061392	0.280345	NA
chr3L	4277837	4278037	201	-0.463834	0.061394	0.280345	Ctl1
chr2L	20734833	20735033	201	-0.462636	0.0614026	0.280345	TM9SF2
chr3L	21321517	21321717	201	-0.466495	0.0614072	0.280345	Rab26
chr2L	11075320	11075520	201	-0.465416	0.0614416	0.280345	CG43725
chr2R	14962875	14963075	201	-0.467857	0.0614566	0.280345	ckn
chr2L	12040596	12040796	201	-0.468771	0.0614684	0.280345	Tom70
chr4	132012	132212	201	-0.466341	0.0614731	0.280345	Ank
chr3L	21516653	21516853	201	-0.46667	0.0615214	0.280481	SAK
chr2R	15899885	15900085	201	-0.467563	0.0615657	0.280524	sli
chr2R	12344812	12345012	201	-0.461781	0.0616545	0.280805	CG8839
chr3L	15141282	15141482	201	-0.465835	0.0616662	0.280805	Pex3
chr3L	19045377	19045577	201	-0.468373	0.061697	0.280809	nkd
chr3L	17557468	17557668	201	-0.462076	0.0617038	0.280809	CycT
chr3L	9784151	9784351	201	-0.464136	0.061748	0.280842	Ae2
chr2L	19398966	19399166	201	-0.467535	0.0617777	0.280851	CG17544
chr3R	12429190	12429390	201	-0.464197	0.0617965	0.280851	CG5641
chrX	2042244	2042444	201	-0.468208	0.0618052	0.280851	Actn
chr2L	13211708	13211908	201	-0.46313	0.0618322	0.28089	FBgn0004191
chrX	13284672	13284872	201	-0.468009	0.0619195	0.280994	CG15743
chr2R	6680304	6680504	201	-0.466773	0.0619274	0.280994	CG15909
chr2R	11237602	11237802	201	-0.457772	0.0619291	0.280994	CG13217
chr2L	10269899	10270099	201	-0.467766	0.0619427	0.280994	CG4957
chr3R	8306292	8306492	201	-0.450787	0.0619622	0.280994	Sgt1
chr3L	19000583	19000783	201	-0.459249	0.0619822	0.280994	CG18135
chrX	1353876	1354076	201	-0.466437	0.0620119	0.280994	CG11417
chrX	6117188	6117388	201	-0.465761	0.0620191	0.280994	Ca-alpha1T
chr2R	22317557	22317757	201	-0.464664	0.06203	0.280994	Gp150
chr3R	8955501	8955701	201	-0.463934	0.0620396	0.280994	ich
chr2L	8950614	8950814	201	-0.465778	0.0621017	0.281192	C1GalTA
chr3L	13049932	13050132	201	-0.466756	0.0621226	0.281203	NA
chr2R	12612280	12612480	201	-0.467474	0.0621609	0.281216	Galphaq
chr3R	30273884	30274084	201	-0.466493	0.0622253	0.281216	FBgn0267782
chr2R	20245306	20245506	201	-0.4646	0.0622454	0.281216	Hacl
chr3R	21295139	21295339	201	-0.466361	0.0622801	0.281216	FBgn0001234
chr3R	23995563	23995763	201	-0.467114	0.0623032	0.281216	CG13604
chr2R	20119736	20119936	201	-0.466183	0.0623175	0.281216	NA
chr3R	10788429	10788629	201	-0.463927	0.0623201	0.281216	Mcm5
chr2L	7426541	7426741	201	-0.455791	0.0623427	0.281216	FBgn0262453
chrX	7923192	7923392	201	-0.466043	0.062357	0.281216	mahe
chr3L	3408926	3409126	201	-0.46594	0.0623917	0.281216	sty
chr3L	9614774	9614974	201	-0.460303	0.0623974	0.281216	LanB2
chrX	6756439	6756639	201	-0.46471	0.0623976	0.281216	sov
chrX	22414824	22415024	201	0.464527	0.062447	0.281335	NA
chr2L	6488990	6489190	201	-0.463923	0.0625997	0.281773	epsilonCOP
chr2L	1158095	1158295	201	-0.460699	0.0626451	0.281842	Tango14
chr2L	1527443	1527643	201	-0.464195	0.0626521	0.281842	NA
chr2L	5542195	5542395	201	-0.457812	0.0627367	0.282072	Lam
chr3R	18659226	18659426	201	-0.466407	0.0627402	0.282072	CstF64
chr3L	749606	749806	201	-0.465559	0.0627974	0.282246	emc
chr2R	12261494	12261694	201	-0.464709	0.0628275	0.282298	Cam
chr2R	1436229	1436429	201	-0.46621	0.0628931	0.282422	l(2)41Ab
chr3L	18589109	18589309	201	-0.460117	0.0629124	0.282422	CG7271
chr2L	7038878	7039078	201	-0.458411	0.0629214	0.282422	milt
chr3R	4659684	4659884	201	-0.462193	0.0629292	0.282422	smash
chr2L	8364762	8364962	201	-0.457887	0.0629686	0.282515	RpS13
chr3R	6350317	6350517	201	-0.465296	0.0630531	0.282805	Hr83
chrX	15892013	15892213	201	-0.465499	0.0630702	0.282805	shi
chr3L	23338032	23338232	201	-0.465566	0.0631029	0.282848	alpha-Cat
chr3L	57091	57291	201	-0.455141	0.0631172	0.282848	CG43149
chr2R	6511492	6511692	201	-0.465735	0.0631524	0.282848	jing
chrY	3272350	3272550	201	-0.462372	0.0631541	0.282848	FBgn0267864
chr3L	18063349	18063549	201	-0.465487	0.063204	0.282988	Eip75B
chr3L	8833012	8833212	201	-0.460398	0.0632277	0.283011	dally
chr3R	2473796	2473996	201	-0.465424	0.0632625	0.283084	Myo81F
chr2R	18977421	18977621	201	-0.463509	0.0633258	0.283284	CG18605
chr2R	23706947	23707147	201	-0.464116	0.0634229	0.283565	CG5504
chr2L	9700421	9700621	201	-0.458118	0.0634468	0.283565	Pka-C1
chr2L	18590320	18590520	201	-0.465121	0.0634972	0.283565	CG15160
chr3L	14783824	14784024	201	-0.463209	0.0635151	0.283565	bmm
chr2R	21322895	21323095	201	-0.455042	0.0635301	0.283565	dom
chr3R	25069218	25069418	201	-0.45219	0.0635872	0.283565	Stt3B
chr3L	16588430	16588630	201	-0.452936	0.0635968	0.283565	l(3)73Ah
chr3R	10585743	10585943	201	-0.456514	0.0636012	0.283565	hth
chr3L	12066744	12066944	201	-0.463728	0.0636172	0.283565	rols
chr3L	13212290	13212490	201	-0.461363	0.0636196	0.283565	FBgn0052126
chr2R	25183033	25183233	201	-0.461356	0.0636332	0.283565	NA
chr2R	15879654	15879854	201	-0.461766	0.0636348	0.283565	sli
chr2L	11061210	11061410	201	-0.460839	0.0636405	0.283565	Samuel
chrX	19637141	19637341	201	-0.464439	0.0636569	0.283565	Rcd-1
chrX	15023814	15024014	201	-0.464786	0.0636855	0.283565	hiw
chrX	2447851	2448051	201	-0.464794	0.0636868	0.283565	z
chr3R	27253794	27253994	201	-0.460842	0.0637407	0.283565	pll
chr2L	7138515	7138715	201	-0.459931	0.0637465	0.283565	Pvf3
chr2L	23390191	23390391	201	-0.464413	0.0637521	0.283565	NA
chr2R	15886787	15886987	201	-0.462581	0.0637725	0.283565	sli
chr3R	12697760	12697960	201	-0.457634	0.0637882	0.283565	Past1
chr3L	16765979	16766179	201	-0.459681	0.0638044	0.283565	Nrt
chr2L	5547029	5547229	201	-0.46081	0.0638166	0.283565	Oscillin
chr2L	3070457	3070657	201	-0.459856	0.0638694	0.283635	toc
chr4	974661	974861	201	-0.463456	0.06391	0.283665	fuss
chr3L	16609206	16609406	201	-0.457956	0.0639154	0.283665	Prosbeta6
chr3L	248195	248395	201	-0.463781	0.0639823	0.283737	E(bx)
chr3R	5320774	5320974	201	-0.459551	0.0639927	0.283737	mtd
chr2R	8051310	8051510	201	-0.463383	0.0640097	0.283737	NA
chr3R	26886876	26887076	201	-0.458208	0.0640374	0.283737	T48
chrX	19786858	19787058	201	-0.45982	0.0640414	0.283737	FBgn0266179
chr3L	6262620	6262820	201	-0.464046	0.0641109	0.28388	Ldh
chr3L	18348929	18349129	201	-0.463502	0.0641936	0.284163	NA
chr2R	10844070	10844270	201	-0.463128	0.0642189	0.284193	CG30015
chrX	15944878	15945078	201	-0.463634	0.0642849	0.284237	Rrp47
chr2R	19632949	19633149	201	-0.461349	0.0642919	0.284237	sm
chr3L	6981724	6981924	201	-0.462465	0.0643394	0.284288	Galphai
chr3L	16051037	16051237	201	-0.4617	0.0643524	0.284288	Mbs
chrX	6688664	6688864	201	-0.461394	0.0643891	0.284368	CG3184
chr2L	9966911	9967111	201	-0.458151	0.0644398	0.28444	RpL13
chr2R	10048005	10048205	201	-0.463465	0.0644539	0.28444	oys
chr3R	17119008	17119208	201	-0.462144	0.0644725	0.28444	cher
chrX	2344595	2344795	201	-0.463112	0.0644799	0.28444	mRpL14
chr3R	13661404	13661604	201	-0.454714	0.0645445	0.28459	Hrb87F
chr3L	15838098	15838298	201	-0.447896	0.0645644	0.28459	CG18081
chr3L	6743075	6743275	201	-0.462346	0.0645842	0.28459	dikar
chr3R	7007110	7007310	201	-0.463176	0.0645933	0.28459	NA
chr3L	3814084	3814284	201	-0.458627	0.0646073	0.28459	Scsalpha1
chrX	12733888	12734088	201	-0.462258	0.0646678	0.284751	FBgn0264678
chr2R	25010219	25010419	201	-0.462594	0.0646962	0.284751	uzip
chr3R	13264239	13264439	201	-0.462907	0.0647127	0.284751	Su(var)3-7
chr3R	8975643	8975843	201	-0.456207	0.0647329	0.284751	NA
chr4	1023894	1024282	389	-0.45134	0.0647642	0.284751	PlexA
chr2L	19576472	19576672	201	-0.462821	0.0647673	0.284751	spi
chrX	2041701	2041901	201	-0.459786	0.0647833	0.284751	Actn
chr2L	21621336	21621536	201	-0.458689	0.0647985	0.284751	CG2201
chr2R	4544758	4544958	201	-0.462259	0.0648152	0.284751	Stlk
chr3L	14786677	14786877	201	-0.450511	0.0648307	0.284751	bmm
chr3R	12974792	12974992	201	-0.459104	0.0648634	0.284812	CG7381
chr3R	6868259	6868459	201	-0.46012	0.0648958	0.284856	NA
chr2L	16350667	16350867	201	-0.454916	0.0649192	0.284856	chif
chr2R	23953943	23954143	201	-0.459544	0.0649295	0.284856	CG3803
chr2L	8276429	8276629	201	-0.457328	0.0650381	0.285229	Btk29A
chrX	8929171	8929371	201	0.460685	0.0650519	0.285229	rdgA
chr3L	794034	794234	201	-0.451103	0.0650764	0.285254	NA
chr4	1088614	1088814	201	-0.461682	0.0651591	0.285365	sv
chr3L	8121698	8121898	201	-0.461201	0.06516	0.285365	ldbr
chrX	4412609	4412809	201	-0.458722	0.0651704	0.285365	bi
chr3L	3059897	3060097	201	-0.458257	0.0652134	0.285365	CG32486
chr3R	5085324	5085524	201	-0.46137	0.0652517	0.285365	corto
chr3L	22267617	22267817	201	-0.461197	0.0652969	0.285365	Csp
chr2R	20149697	20149897	201	0.452679	0.0653582	0.285365	FBgn0266764
chr2R	23851440	23851640	201	-0.461231	0.0653778	0.285365	ytr
chr2R	13506299	13506499	201	-0.458828	0.065381	0.285365	mEFTu1
chr3R	22626876	22627076	201	-0.461841	0.0653812	0.285365	loco
chr2R	23206952	23207152	201	-0.458404	0.0653813	0.285365	side-V
chr2R	10584318	10584518	201	-0.461044	0.0653896	0.285365	psq
chrX	9129570	9129770	201	-0.461647	0.0654025	0.285365	fend
chr2L	3023060	3023260	201	-0.461526	0.0654033	0.285365	alpha4GT1
chr2L	17410585	17410785	201	-0.459272	0.0654317	0.285365	Rpb11
chr3R	11344064	11344264	201	-0.456177	0.0654554	0.285365	pros
chr3L	14451873	14452073	201	-0.459268	0.0654719	0.285365	bbg
chr2L	23313523	23313723	201	-0.457789	0.0654895	0.285365	Tim23
chr3R	9158094	9158294	201	-0.461559	0.0654948	0.285365	pum
chr2R	6872977	6873177	201	-0.453475	0.065527	0.285423	CG9447
chr3L	16112575	16112775	201	-0.449445	0.0655594	0.285445	Taf4
chr3L	16314926	16315126	201	-0.459338	0.0655695	0.285445	CG13062
chr2R	17412921	17413121	201	-0.4543	0.0656376	0.285553	Prosalpha5
chr3L	24929510	24929710	201	0.45058	0.0656529	0.285553	NA
chr2L	13019071	13019271	201	-0.460129	0.065669	0.285553	CG9934
chr2R	15009084	15009284	201	-0.458908	0.0658212	0.286133	hbs
chr2R	17823868	17824068	201	-0.459379	0.0659022	0.286403	grh
chr3R	6914313	6914513	201	-0.457693	0.0659349	0.286463	Antp
chrX	13278778	13278978	201	-0.460608	0.0660744	0.286687	HDAC4
chr2L	1419787	1419987	201	-0.445713	0.066087	0.286687	robo2
chr2R	13167961	13168161	201	-0.457911	0.0660888	0.286687	GLaz
chrX	15853089	15853289	201	-0.46039	0.0661167	0.286687	UBL3
chr2L	21741540	21741740	201	-0.452477	0.0661282	0.286687	step
chr2R	19283875	19284075	201	-0.460049	0.0661531	0.286687	CG11906
chr3R	22724489	22724689	201	-0.460034	0.0661602	0.286687	Irp-1A
chr3L	22262827	22263027	201	-0.459785	0.0662023	0.286687	Ddx1
chr2L	8675630	8675830	201	-0.460192	0.0662051	0.286687	Glt
chr3L	3315622	3315822	201	-0.457429	0.066225	0.286687	Drsl5
chr3R	6963232	6963432	201	-0.456827	0.066232	0.286687	Antp
chr3L	7250463	7250663	201	-0.45555	0.0662326	0.286687	Cdc27
chr3R	16730859	16731059	201	-0.452765	0.0662797	0.286687	Ubx
chr2L	8214133	8214333	201	-0.451617	0.0662931	0.286687	CG8372
chr2R	13152578	13152778	201	-0.459971	0.0663143	0.286687	Ack-like
chr3R	5109949	5110149	201	-0.459968	0.0663235	0.286687	CG43131
chr3L	17044964	17045164	201	-0.452104	0.0663337	0.286687	TpnC73F
chr3R	16514508	16514708	201	-0.45577	0.0664068	0.286687	CG42342
chr2R	14975818	14976018	201	-0.455598	0.0664181	0.286687	ckn
chr3R	12447806	12448006	201	-0.455407	0.0664188	0.286687	CG18549
chr2R	10483995	10484195	201	-0.45786	0.0664304	0.286687	pre-lola-G
chr2R	9177192	9177392	201	-0.454989	0.0664386	0.286687	Rme-8
chr3L	16052765	16052965	201	-0.457634	0.0664596	0.286687	Mbs
chr2R	20832836	20833036	201	-0.451317	0.0664882	0.286687	insc
chr3R	8308355	8308555	201	-0.456114	0.0664943	0.286687	tex
chr2L	20066237	20066437	201	-0.457448	0.0666947	0.287159	vls
chr3R	16773276	16773476	201	-0.450109	0.0667023	0.287159	FBgn0020556
chr2L	14689559	14689759	201	-0.453535	0.0667029	0.287159	osp
chr2R	22397693	22397893	201	-0.457796	0.0667052	0.287159	babos
chr3R	22667987	22668187	201	-0.458075	0.0667119	0.287159	wake
chr3L	19086615	19086815	201	-0.451488	0.0667167	0.287159	Mkp3
chr2R	1451843	1452043	201	-0.455957	0.06674	0.287178	NA
chr3L	3418293	3418493	201	-0.458834	0.0669433	0.28789	sty
chr2L	19036586	19036786	201	-0.451317	0.0669876	0.288	CG31800
chr2L	17384825	17385025	201	-0.45115	0.0670928	0.288076	CLIP-190
chr3R	16729542	16729742	201	-0.455205	0.0670938	0.288076	Ubx
chr2R	21017659	21017859	201	-0.45783	0.0671178	0.288076	CG3295
chr3R	11974852	11975052	201	-0.450555	0.0671235	0.288076	Tango9
chr2L	9994179	9994379	201	-0.458241	0.0671775	0.288076	bib
chr3R	4616165	4616365	201	-0.455377	0.0672034	0.288076	5-HT2A
chr2R	12113725	12113925	201	0.458033	0.0672494	0.288076	jeb
chr2R	10077107	10077307	201	-0.452001	0.067253	0.288076	CG1371
chr2L	22151649	22151849	201	-0.456931	0.0672674	0.288076	dunk
chr3R	22675604	22675804	201	-0.45185	0.0672826	0.288076	wake
chr3R	21065085	21065285	201	-0.457602	0.0672836	0.288076	AnxB9
chr2L	22139491	22139691	201	-0.453868	0.0672948	0.288076	CG42748
chr2R	17698272	17698472	201	-0.452901	0.0673019	0.288076	rdgBbeta
chr3R	16821599	16821799	201	-0.456444	0.0673123	0.288076	abd-A
chr2R	19445711	19445911	201	-0.458132	0.0673271	0.288076	EloC
chr3L	20002614	20002814	201	-0.443617	0.0673476	0.288076	Gabat
chr2R	13570911	13571111	201	-0.455553	0.0673608	0.288076	CG42807
chr3R	18981300	18981500	201	-0.458327	0.0673902	0.288076	dnk
chr3L	3325847	3326047	201	-0.455201	0.0673959	0.288076	Strip
chr3R	8333850	8334050	201	-0.454417	0.0674177	0.288076	Poxm
chr2L	10386174	10386374	201	-0.453421	0.0674212	0.288076	Cdk1
chr2R	10844728	10844928	201	-0.454382	0.0675003	0.288236	CG30015
chr2R	17868883	17869083	201	-0.452361	0.0675439	0.288236	thr
chr2L	8740988	8741188	201	-0.447846	0.0675571	0.288236	raw
chr3R	8932106	8932306	201	-0.458065	0.0675768	0.288236	osk
chr2L	115168	115368	201	-0.456069	0.0675877	0.288236	CG13694
chr2L	21380026	21380226	201	0.452785	0.0675938	0.288236	nrv3
chr3R	6907620	6907820	201	-0.45782	0.0675994	0.288236	Antp
chr3L	1569050	1569250	201	-0.452468	0.06761	0.288236	CG7879
chr3L	18135921	18136121	201	0.452369	0.0676506	0.288329	FBgn0265880
chrX	617235	617435	201	-0.456297	0.067709	0.288497	CG13366
chr2L	5326626	5326826	201	-0.453956	0.0677497	0.288589	cype
chr3L	4553491	4553691	201	-0.444688	0.0677784	0.288602	CG42540
chr2L	518725	518925	201	-0.455994	0.0677906	0.288602	ush
chr3R	2111099	2111299	201	-0.454472	0.0678362	0.288716	Myo81F
chr3R	563492	563692	201	-0.451946	0.0678603	0.288738	NA
chr2L	20996116	20996316	201	-0.446076	0.0680056	0.2889	CG42238
chr2L	22536689	22536889	201	-0.457196	0.0680084	0.2889	CG17490
chr2L	21262852	21263052	201	-0.446847	0.0680218	0.2889	CG8671
chr2L	6373438	6373638	201	-0.457274	0.0680311	0.2889	slam
chr2L	6259723	6259923	201	0.457192	0.0680915	0.289076	Ddr
chr3L	17024228	17024428	201	-0.454577	0.0681422	0.289211	a10
chr3R	21064430	21064630	201	-0.454276	0.0681964	0.289332	AnxB9
chr3R	5212071	5212271	201	-0.454159	0.0682317	0.289332	cno
chr3R	17616663	17616863	201	-0.454278	0.0682462	0.289332	FBgn0012002
chr2R	21712323	21712523	201	-0.456353	0.0682577	0.289332	HmgD
chr4	181753	181953	201	-0.454897	0.0683419	0.289332	Arl4
chr2L	17743842	17744042	201	-0.453227	0.0683599	0.289332	CadN
chr3L	14448526	14448726	201	-0.456378	0.068366	0.289332	bbg
chr2R	13235838	13236038	201	-0.456722	0.0683748	0.289332	Qsox1
chr2L	21647	21847	201	-0.446191	0.0683958	0.289332	l(2)gl
chrX	6225461	6225661	201	-0.456265	0.0684107	0.289332	sqh
chr3R	14675087	14675287	201	-0.454981	0.0684338	0.289332	Meltrin
chr2L	13021225	13021425	201	-0.45503	0.068451	0.289332	A16
chr2L	17261709	17261909	201	-0.452121	0.0684866	0.289332	beat-IIIc
chr3R	6965148	6965348	201	-0.45613	0.0684908	0.289332	Antp
chr3L	14556212	14556412	201	-0.455467	0.0684935	0.289332	NA
chr2L	13829721	13829921	201	-0.447456	0.0685328	0.289418	Arpc1
chr2L	9166680	9166880	201	-0.456184	0.0685804	0.289539	CG9586
chr2R	5650441	5650641	201	-0.451827	0.0687459	0.289996	hrm
chr3L	23099553	23099753	201	-0.45403	0.0688223	0.290106	CkIIalpha
chr2L	7033119	7033319	201	-0.442448	0.0688528	0.290106	Rab30
chr3R	5856201	5856401	201	-0.454332	0.0689053	0.290106	ECSIT
chr3R	5613015	5613215	201	-0.452968	0.0689175	0.290106	Rga
chr2R	13966223	13966423	201	-0.451661	0.0689242	0.290106	Cp1
chr3R	31936048	31936248	201	-0.45571	0.0689793	0.290258	heph
chrX	1899479	1899679	201	-0.455347	0.0690847	0.290329	arm
chr3R	21429279	21429479	201	-0.450628	0.0690856	0.290329	lbl
chr2L	19135247	19135447	201	-0.455518	0.0690876	0.290329	brat
chr2R	14152559	14152759	201	-0.454177	0.0690908	0.290329	Rcd1
chr3R	22726292	22726492	201	-0.452948	0.069104	0.290329	Irp-1A
chr2R	24884760	24884960	201	0.441735	0.0691105	0.290329	NKAIN
chr2R	24033606	24033806	201	-0.447594	0.0691433	0.290387	Chi
chr2R	6141219	6141419	201	-0.45139	0.0691855	0.290484	EcR
chr3L	5753128	5753328	201	-0.453599	0.0692383	0.290545	Usp47
chr3R	13070259	13070459	201	-0.443763	0.069274	0.290551	sim
chr3L	7094685	7094885	201	-0.448985	0.0692842	0.290551	form3
chr3R	8343422	8343622	201	-0.448966	0.0693054	0.290551	CG9601
chr2R	13934323	13934523	201	-0.454502	0.0693178	0.290551	shot
chr2L	19063171	19063371	201	-0.452044	0.069337	0.290551	CG10495
chr3L	9073002	9073202	201	-0.447975	0.069373	0.290551	teq
chr3R	8963471	8963671	201	-0.453964	0.0694023	0.290593	ich
chrX	23083110	23083310	201	-0.453183	0.0694835	0.290721	CG17163
chr3R	11967584	11967784	201	-0.451473	0.0694924	0.290721	CG12213
chr2L	21634846	21635046	201	-0.454303	0.0695106	0.290721	Ac3
chr3R	2198383	2198583	201	-0.441419	0.0695232	0.290721	Myo81F
chr3L	20302320	20302520	201	-0.44516	0.0695281	0.290721	SCCRO4
chr2R	1152700	1152900	201	0.446467	0.0695621	0.290783	NA
chr3R	4337684	4337884	201	-0.449588	0.0696255	0.290878	CG1103
chr3R	5606468	5606668	201	-0.453691	0.0696419	0.290878	asl
chr2L	13835234	13835434	201	-0.452455	0.0696825	0.290881	DNApol-gamma35
chr2R	22122491	22122691	201	-0.452782	0.0696891	0.290881	mei-S332
chr3L	15511777	15511977	201	-0.445789	0.0697023	0.290881	MsrA
chr3R	17043483	17043683	201	-0.451321	0.0697191	0.290881	CG3995
chr2L	21168223	21168423	201	-0.449591	0.069757	0.29096	mAcon1
chr3L	18683976	18684176	201	-0.453737	0.0699006	0.29132	Sgf11
chr3L	15234418	15234618	201	-0.444549	0.0699671	0.291423	Tollo
chr2R	12507237	12507437	201	-0.447348	0.0699857	0.291423	fdl
chr3L	14624423	14624623	201	-0.45138	0.0700299	0.291423	CG9628
chr3L	27136357	27136557	201	-0.453118	0.0700555	0.291423	vtd
chr2L	4463407	4463607	201	-0.449872	0.070076	0.291423	CG15443
chrX	1134121	1134321	201	-0.452507	0.0700784	0.291423	CG3655
chr2L	6851939	6852139	201	-0.452852	0.0701048	0.291451	Rca1
chr3R	8716158	8716358	201	-0.449954	0.0701382	0.291451	Cks85A
chr3L	20287258	20287458	201	-0.443544	0.0701426	0.291451	gogo
chr3L	4230224	4230424	201	-0.453342	0.070162	0.291452	ImpL2
chrX	15554530	15554730	201	-0.453618	0.0701818	0.291453	Ac13E
chr3L	17533483	17533683	201	-0.449013	0.0702003	0.291453	Nedd4
chr3R	30563560	30563760	201	-0.440854	0.0702443	0.291556	tmod
chr2L	19363698	19363898	201	-0.45272	0.0702916	0.291609	dnt
chr3R	24805207	24805407	201	-0.4485	0.0702953	0.291609	polybromo
chr3L	20000986	20001186	201	-0.449103	0.0703744	0.291659	Gabat
chr3R	13030570	13030770	201	-0.443803	0.0703859	0.291659	l(3)87Df
chr2L	12351177	12351377	201	0.450247	0.0704044	0.291659	bru2
chr3R	21377291	21377491	201	-0.445555	0.0704736	0.291659	mod(mdg4)
chr2R	14928121	14928321	201	-0.451785	0.0704903	0.291659	Kank
chr3R	20592986	20593186	201	-0.451884	0.0705197	0.291659	bon
chr3L	4976282	4976482	201	-0.445564	0.0705468	0.291659	Con
chr3R	16685174	16685374	201	-0.453115	0.0705515	0.291659	Ubx
chr3R	16146939	16147139	201	-0.449378	0.0705789	0.291659	CG5903
chr3R	9726529	9726729	201	-0.450896	0.0705865	0.291659	hyd
chr2L	21134839	21135039	201	-0.445277	0.0706119	0.291659	Dap160
chr3R	14088322	14088685	364	-0.445813	0.070618	0.291659	Npc2b
chr3L	21131546	21131746	201	-0.452627	0.0706271	0.291659	ko
chr2L	21105181	21105381	201	-0.452715	0.0706798	0.291659	Nhe2
chr3R	6380108	6380308	201	-0.440717	0.0706836	0.291659	TfIIFalpha
chr2L	3029105	3029305	201	-0.451702	0.070688	0.291659	Sf3b2
chr3L	20441748	20441948	201	-0.449073	0.0707466	0.291659	Hpd
chr2L	6455379	6455579	201	-0.449498	0.0707476	0.291659	retm
chrX	15063362	15063562	201	-0.45225	0.0707565	0.291659	hiw
chr3L	11648636	11648836	201	-0.445461	0.0707883	0.291659	CG6071
chrX	13782057	13782257	201	-0.452157	0.0708682	0.291659	CtsB1
chr2R	15873534	15873734	201	-0.446654	0.0708759	0.291659	sli
chr2L	247493	247693	201	-0.451643	0.0709082	0.291659	FBgn0265149
chr3R	5118464	5118664	201	-0.451092	0.0709154	0.291659	NA
chr3R	22461957	22462157	201	-0.444696	0.0709222	0.291659	Rpn7
chr2R	12038935	12039135	201	-0.450848	0.0709253	0.291659	RpIII128
chr2R	15147745	15147945	201	-0.448167	0.0709308	0.291659	CG8089
chr2L	11809354	11809554	201	-0.450759	0.0709456	0.291659	crol
chr3R	24230401	24230601	201	-0.449379	0.0709793	0.291659	Spase22-23
chr2R	17026695	17026895	201	-0.450063	0.0709814	0.291659	RhoGEF2
chr3L	15580707	15580907	201	-0.443593	0.0709961	0.291659	CG12301
chr3L	12868040	12868240	201	-0.452349	0.0710005	0.291659	NA
chr3L	11008829	11009029	201	-0.450033	0.0710014	0.291659	klu
chr2L	12063089	12063289	201	-0.451308	0.071022	0.291659	Rab3-GAP
chr3L	20497205	20497405	201	-0.447272	0.0710469	0.291659	ZnT77C
chr3L	19556745	19556945	201	-0.448156	0.0710487	0.291659	FBgn0265888
chr4	129707	129907	201	-0.44621	0.0710536	0.291659	Ank
chr2R	8130173	8130373	201	-0.446872	0.0712637	0.292243	Pabp2
chr3L	15580416	15580616	201	-0.44578	0.0712776	0.292243	CG12301
chr4	219267	219467	201	-0.443022	0.0712787	0.292243	CG31999
chr2R	6613614	6613814	201	-0.442513	0.0712919	0.292243	jing
chr3R	18590832	18591032	201	-0.447173	0.0713603	0.292366	CG7694
chrX	1669472	1669672	201	-0.451744	0.0713946	0.292428	hfw
chr3L	5603882	5604082	201	-0.450369	0.0714238	0.292432	TM9SF3
chr3R	31793869	31794069	201	-0.448664	0.0714339	0.292432	Acf
chr3L	3811151	3811351	201	-0.450114	0.0714772	0.292507	Scsalpha1
chr3R	12413676	12413876	201	-0.444038	0.0714905	0.292507	Dip-C
chr3L	14977577	14977777	201	-0.447706	0.0715499	0.29257	CG3349
chr2L	16816584	16816784	201	-0.447361	0.0715604	0.29257	mdy
chr3R	3975158	3975358	201	-0.447655	0.0715676	0.29257	NA
chr2R	24543541	24543741	201	-0.450923	0.0715828	0.29257	CG4622
chr2L	15012685	15012885	201	-0.44895	0.0716129	0.292614	FBgn0264438
chr3R	21659826	21660026	201	-0.446936	0.0716621	0.292711	E2f1
chr3L	21131193	21131393	201	-0.449815	0.0716748	0.292711	ko
chrX	20394250	20394450	201	-0.451168	0.0716981	0.292719	Syx16
chrX	3881097	3881297	201	-0.446726	0.0717372	0.29273	CG15239
chr2L	9957169	9957369	201	-0.446658	0.071806	0.292776	CG13126
chr3L	13412735	13412935	201	-0.450639	0.0718279	0.292787	CG10222
chr2R	6600433	6600633	201	-0.450652	0.071881	0.292924	CG15233
chr3L	1298595	1298795	201	-0.450762	0.0719282	0.293034	scf
chrX	11818719	11818919	201	-0.450272	0.0719807	0.293034	CG1578
chr2L	21261106	21261306	201	-0.45024	0.0719997	0.293034	l(2)k14505
chr3R	30904537	30904737	201	0.440809	0.0720919	0.293314	CG33483
chr2L	2576653	2576853	201	-0.446045	0.0721502	0.293439	Rad1
chr2R	17412647	17412847	201	-0.442619	0.0721613	0.293439	Prosalpha5
chr2L	20645691	20645891	201	-0.448768	0.0722285	0.293634	phr6-4
chr3R	29861755	29861955	201	-0.445098	0.0723195	0.293773	CG7824
chr3R	11237709	11237909	201	-0.448199	0.0723204	0.293773	Arfip
chr3R	18166393	18166593	201	-0.450031	0.0723724	0.293906	CG7218
chr3R	4387629	4387829	201	-0.445141	0.0724138	0.293927	tub
chr2R	3830067	3830267	201	-0.436655	0.0724162	0.293927	NA
chr3R	5438862	5439062	201	-0.445501	0.072477	0.294095	CG14669
chr3R	16933420	16933620	201	-0.448065	0.0725518	0.294173	Abd-B
chr3L	17669193	17669393	201	-0.445066	0.0725731	0.294173	Crtc
chr3R	16700940	16701140	201	-0.444749	0.0726007	0.294173	Ubx
chrX	3838003	3838203	201	-0.449731	0.0726178	0.294173	ec
chr2L	4967679	4967879	201	-0.449739	0.072632	0.294173	eIF3i
chr3L	21536974	21537174	201	-0.443666	0.0726397	0.294173	Rpn10
chr3R	6885413	6885613	201	-0.448844	0.0726502	0.294173	FBgn0266236
chr2L	16491446	16491646	201	-0.443603	0.0726506	0.294173	Tpr2
chr3R	3734705	3734905	201	-0.448064	0.0726961	0.294179	Tim17b
chr2R	5258113	5258313	201	0.436485	0.0727286	0.294179	d4
chr3R	29039901	29040101	201	-0.444421	0.0727351	0.294179	Pkc98E
chr2R	24029186	24029386	201	-0.449402	0.0727462	0.294179	CG3163
chr2L	21164664	21164864	201	-0.445081	0.0727665	0.294179	Nbr
chr2L	10009949	10010149	201	-0.438222	0.0727678	0.294179	Trp1
chrX	15732076	15732276	201	-0.448714	0.0727881	0.294183	MagR
chr2L	23034512	23034712	201	-0.449371	0.0728161	0.2942	NA
chr2L	6611460	6611660	201	-0.447766	0.0728309	0.2942	CG11050
chr3L	12806384	12806584	201	-0.444217	0.0728677	0.294271	CG32110
chr3L	15079382	15079582	201	-0.443469	0.0729097	0.29432	Or71a
chr3R	14886354	14886554	201	-0.448151	0.0729533	0.29432	Rrp6
chrX	12750241	12750441	201	-0.449054	0.0729567	0.29432	FBgn0265830
chr3R	22587597	22587797	201	-0.442521	0.0729573	0.29432	btn
chr3L	11041349	11041549	201	-0.439802	0.0730342	0.294538	CG43693
chrX	3847335	3847535	201	-0.446898	0.0730499	0.294538	ec
chr2L	4595047	4595247	201	-0.442395	0.0731056	0.294685	dpy
chr3L	27088811	27089011	201	-0.442721	0.0731455	0.294764	NA
chr3R	25066068	25066268	201	-0.445224	0.0731707	0.294764	veli
chr3R	5150581	5150781	201	-0.441732	0.0731904	0.294764	dpr16
chrX	18634822	18635022	201	-0.447431	0.0732088	0.294764	wgn
chr2L	19136963	19137163	201	-0.447462	0.073222	0.294764	brat
chrX	8215913	8216113	201	-0.448344	0.0732919	0.294894	sdt
chr3L	21679648	21679848	201	-0.444771	0.0733063	0.294894	Als2
chr3R	20948154	20948354	201	-0.441496	0.0733123	0.294894	Atpalpha
chrX	12821704	12821904	201	-0.448335	0.0733668	0.294957	Pde9
chr2L	13366049	13366249	201	-0.4485	0.0733928	0.294984	Nnp-1
chr2L	19339090	19339290	201	-0.44639	0.0734317	0.295052	dnt
chr3L	16231947	16232147	201	-0.441871	0.0734668	0.295052	PDCD-5
chr2R	17616654	17616854	201	-0.448275	0.0734704	0.295052	CG10936
chrX	2792536	2792736	201	-0.443296	0.0735103	0.295067	FBgn0003996
chr3L	26847701	26847901	201	0.448188	0.0735455	0.295131	NA
chr3L	21008935	21009135	201	-0.448266	0.0735676	0.295142	skd
chr3R	26875636	26875836	201	-0.445832	0.0736054	0.295203	ms(3)K81
chr3R	10144526	10144726	201	-0.446886	0.0736217	0.295203	TAF1B
chr2R	17747949	17748149	201	-0.444642	0.0736663	0.295229	sub
chr2R	13558034	13558234	201	-0.4477	0.0736667	0.295229	CG13334
chr3L	1746815	1747015	201	-0.447551	0.0737021	0.295293	CG13921
chrX	13718180	13718380	201	-0.447823	0.0738153	0.295669	Nadsyn
chr3R	15792553	15792753	201	-0.447506	0.0738432	0.295696	c(3)G
chrX	655173	655373	201	-0.444195	0.0738611	0.295696	SkpA
chr4	423393	423593	201	-0.443841	0.0738806	0.295697	FBgn0263385
chr3R	13434900	13435100	201	-0.442461	0.0739777	0.296008	yrt
chr2L	10056835	10057035	201	-0.446966	0.074009	0.296055	Pen
chr3R	13065307	13065507	201	-0.446804	0.0740532	0.296154	sim
chr3R	29503872	29504072	201	-0.444075	0.0741158	0.296272	Trc8
chr3L	21066627	21066827	201	-0.444951	0.0741215	0.296272	siz
chr2L	8427898	8428098	201	-0.447148	0.07416	0.296348	Akap200
chr2R	16178455	16178655	201	-0.434536	0.0741811	0.296355	Lis-1
chrX	8215274	8215474	201	-0.447056	0.0742633	0.296605	sdt
chr3L	25119750	25119950	201	-0.43887	0.0742996	0.296612	UQCR-11
chr3L	1496540	1496740	201	-0.444066	0.0743373	0.296612	CG12084
chr3L	18356435	18356635	201	-0.442449	0.0743378	0.296612	NA
chr2R	21282867	21283067	201	-0.445921	0.0743428	0.296612	MFS16
chr2R	1224683	1224883	201	-0.444721	0.0743664	0.296629	NA
chr2R	24060280	24060480	201	-0.441501	0.0744109	0.296662	RpL12
chr3R	18082059	18082259	201	-0.439236	0.074432	0.296662	CG14317
chr2L	21756724	21756924	201	-0.434752	0.0744568	0.296662	CG1416
chr3R	4484945	4485145	201	-0.441875	0.074479	0.296662	Fip1
chr2L	19363153	19363353	201	-0.446807	0.0744916	0.296662	dnt
chrX	3135671	3135871	201	-0.441685	0.0745431	0.296732	N
chr2L	207242	207442	201	-0.445236	0.074548	0.296732	CG11617
chr2L	22134214	22134414	201	-0.445608	0.0745708	0.296745	CG42748
chrX	18137608	18137808	201	-0.44429	0.0745991	0.296761	ari-1
chr3L	16594927	16595127	201	-0.446128	0.0746332	0.296761	spd-2
chrX	15467494	15467694	201	-0.446543	0.0746642	0.296807	CG15642
chr3L	857644	857844	201	-0.441715	0.0747627	0.296973	dpr20
chr2R	19411338	19411538	201	-0.443275	0.0747804	0.296973	hts
chr2R	10558075	10558275	201	-0.434426	0.0747839	0.296973	psq
chr4	261801	262001	201	-0.438684	0.0748068	0.296976	RhoGAP102A
chr2R	5363368	5363568	201	-0.44381	0.074825	0.296976	CG10417
chr3L	3909514	3909714	201	-0.445527	0.0748586	0.296976	mge
chr3L	7370221	7370421	201	-0.443638	0.0748627	0.296976	Sh3beta
chr3R	8344308	8344508	201	-0.444423	0.0749306	0.297168	CG9601
chr3R	19326621	19326821	201	-0.438048	0.0750574	0.297375	Dl
chr2R	15115556	15115756	201	-0.440569	0.0750595	0.297375	chn
chrX	7933282	7933482	201	-0.440417	0.07507	0.297375	RpS14a
chr3R	26876501	26876701	201	-0.441496	0.0750847	0.297375	ms(3)K81
chr3L	3090668	3090868	201	-0.433029	0.0750998	0.297375	FBgn0003938
chr3L	20361422	20361622	201	-0.438376	0.0751632	0.297538	DNApol-alpha60
chr2R	5671637	5671837	201	-0.434398	0.0751852	0.297538	kune
chr2L	17743041	17743241	201	-0.438975	0.0751996	0.297538	CadN
chr2L	5276403	5276603	201	-0.444185	0.0752683	0.297733	Bsg25D
chr3L	7381446	7381646	201	-0.442206	0.0752915	0.297747	smid
chr3L	15839877	15840077	201	-0.441706	0.0753414	0.297867	CG15715
chr2R	15699855	15700055	201	-0.43874	0.0753787	0.297938	CG30080
chr3R	9334611	9334811	201	-0.44408	0.0754175	0.297949	CG16749
chr3L	6747232	6747432	201	-0.444053	0.0754206	0.297949	velo
chr2L	19507560	19507760	201	-0.439934	0.0754605	0.29802	cyst
chr2L	16529375	16529575	201	0.439719	0.0755024	0.29804	CG5953
chr2L	15768252	15768452	201	-0.440709	0.0755816	0.298235	wek
chr2L	6100228	6100428	201	-0.442171	0.075591	0.298235	CG9175
chr2L	21618754	21618954	201	-0.444395	0.0757412	0.298547	CG2201
chr2L	7010190	7010390	201	-0.433417	0.0757504	0.298547	uif
chr3L	6173817	6174017	201	-0.435863	0.0757531	0.298547	fmt
chr4	1025870	1026070	201	-0.437547	0.0757747	0.298547	PlexA
chr3R	28635004	28635204	201	-0.444525	0.0758103	0.298547	CG10011
chr2L	8415619	8415819	201	-0.442635	0.0758289	0.298547	Akap200
chr3L	1364343	1364543	201	-0.436894	0.0758422	0.298547	Ptp61F
chr3R	16072189	16072389	201	-0.444509	0.0758463	0.298547	Mhcl
chr2L	8212790	8212990	201	-0.444615	0.0758682	0.298556	Su(var)205
chr2L	9711162	9711362	201	-0.438176	0.075988	0.29888	CG4364
chr3R	4433401	4433601	201	-0.433676	0.0760104	0.29888	eIF3a
chr2R	14314550	14314750	201	-0.443181	0.0760267	0.29888	Shrm
chr3L	20006773	20006973	201	-0.43783	0.0760289	0.29888	kug
chr2L	8466702	8466902	201	-0.443996	0.0760795	0.299002	Agpat2
chr3L	15143933	15144133	201	-0.43666	0.0761006	0.299007	Pex3
chr3R	16718870	16719070	201	-0.432531	0.076159	0.29916	Ubx
chr3R	21141060	21141260	201	-0.441543	0.0762263	0.299284	SNF4Agamma
chr3L	17415754	17415954	201	-0.441774	0.0762299	0.299284	blot
chr3R	5211549	5211749	201	-0.443268	0.0762553	0.299307	cno
chr3R	19774248	19774448	201	-0.439264	0.0763398	0.299561	GluClalpha
chr2L	11130611	11130811	201	-0.443857	0.0763778	0.299633	RfC38
chr2R	16951728	16951928	201	-0.441776	0.0764612	0.299828	Ufm1
chrX	12745227	12745427	201	-0.437236	0.0764721	0.299828	CG4004
chr3R	14716288	14716488	201	-0.440533	0.0764866	0.299828	kibra
chr2L	2993311	2993511	201	-0.44064	0.0765456	0.299908	okr
chr2L	20800561	20800761	201	-0.435805	0.0765473	0.299908	CG9328
chr3L	13991401	13991601	201	-0.435937	0.076566	0.299908	CG17364
chr3L	16114025	16114225	201	-0.434632	0.0766451	0.300039	Taf4
chr3R	13434391	13434591	201	-0.431484	0.0766477	0.300039	yrt
chr3R	3750244	3750444	201	-0.439985	0.0766586	0.300039	CG41128
chr2L	1177573	1177773	201	-0.440223	0.0767538	0.300102	CG4887
chrX	11695115	11695315	201	-0.442089	0.0767573	0.300102	PhKgamma
chr3R	30806536	30806736	201	-0.431959	0.0767587	0.300102	wts
chr2R	25072820	25073020	201	-0.442167	0.0767934	0.300102	gol
chr3R	16351128	16351328	201	-0.442322	0.0768298	0.300102	CG14879
chr2L	14486180	14486380	201	-0.441998	0.0768302	0.300102	FBgn0265944
chr3R	29861399	29861599	201	-0.439186	0.0768338	0.300102	CG7824
chr3L	19293334	19293534	201	-0.442617	0.0768344	0.300102	fal
chrX	620138	620338	201	-0.443115	0.0768673	0.300102	Vsp37A
chr3R	25482719	25482919	201	-0.442897	0.0768714	0.300102	XNP
chr3L	19171637	19171837	201	-0.438969	0.0770077	0.300369	fz2
chrX	9243402	9243602	201	-0.437077	0.077013	0.300369	Larp7
chr3R	5176023	5176223	201	-0.437968	0.0770159	0.300369	cno
chr3L	4542454	4542654	201	-0.436864	0.0770436	0.300369	CG11357
chr2L	8846813	8847013	201	-0.442077	0.0770582	0.300369	NA
chr3R	13715022	13715222	201	-0.440574	0.0771797	0.300538	FBgn0054044
chr2L	8952839	8953039	201	-0.436702	0.077185	0.300538	C1GalTA
chr2R	10819828	10820028	201	-0.4418	0.0771966	0.300538	Prosbeta5
chr3R	27239036	27239236	201	-0.442271	0.0771973	0.300538	DNApol-alpha73
chr2L	1409359	1409559	201	-0.435247	0.0772001	0.300538	robo2
chr2L	3605850	3606050	201	-0.442466	0.0772241	0.300555	odd
chr3L	16378492	16378692	201	-0.440306	0.0772475	0.300569	roq
chr3L	16865157	16865357	201	-0.432396	0.0774009	0.30081	Rh4
chr2R	7939740	7939940	201	-0.442015	0.077408	0.30081	CG8728
chr3L	19042045	19042245	201	-0.439963	0.0774652	0.30081	nkd
chr2R	5974337	5974537	201	-0.442168	0.0774734	0.30081	BubR1
chr3L	13877002	13877202	201	-0.440044	0.0774782	0.30081	CG13737
chr2L	15751011	15751211	201	-0.438262	0.0774784	0.30081	Mtr4
chr3R	28588531	28588731	201	-0.435137	0.0774871	0.30081	FBgn0262741
chr3R	5794647	5794847	201	-0.438404	0.0775494	0.300899	PSMG1
chr2L	22129734	22129934	201	-0.436786	0.0776414	0.301026	CycK
chrX	14749258	14749458	201	-0.441885	0.0776867	0.301026	NetB
chr2L	21644040	21644240	201	0.440252	0.0777026	0.301026	Ac3
chr2R	4419318	4419518	201	-0.437121	0.0777205	0.301026	Gprk1
chr2R	12957974	12958174	201	-0.441155	0.0777659	0.301126	NA
chr2L	5275460	5275660	201	-0.441668	0.0778177	0.301186	Bsg25D
chr2R	11615056	11615256	201	-0.441093	0.077821	0.301186	tou
chr3R	21156695	21156895	201	-0.436511	0.0778955	0.301346	SNF4Agamma
chr3R	8663046	8663246	201	-0.434625	0.0779018	0.301346	CG8032
chr3R	16745133	16745333	201	-0.438448	0.0780076	0.301584	FBgn0020556
chr2R	13980069	13980269	201	-0.431538	0.0780985	0.301584	CG6701
chr3L	13922839	13923039	201	-0.440756	0.0781003	0.301584	Rgl
chr3R	10112103	10112303	201	-0.435592	0.0781146	0.301584	Fmr1
chr3R	23679947	23680147	201	-0.440748	0.0781219	0.301584	CG16710
chrX	15804212	15804412	201	-0.440491	0.0781253	0.301584	sd
chr3L	24750170	24750370	201	-0.44037	0.0781266	0.301584	scro
chr2R	8814430	8814630	201	0.434902	0.0781416	0.301584	sns
chr3R	5485460	5485660	201	-0.440688	0.0782286	0.301844	ksr
chr3R	30203563	30203763	201	0.433005	0.0782646	0.301863	CG9743
chr3R	363786	363986	201	-0.438862	0.0782916	0.301863	NA
chr3R	7028674	7028874	201	-0.435183	0.0782982	0.301863	NA
chr3R	4806398	4806598	201	-0.440843	0.0783128	0.301863	ctrip
chr3R	5368204	5368404	201	-0.438759	0.0784441	0.302144	Cerk
chr3L	11210554	11210754	201	-0.435348	0.0784453	0.302144	Ube3a
chr2R	12326251	12326451	201	-0.439634	0.0785062	0.302303	CG8841
chr2L	19576050	19576250	201	-0.438332	0.0785417	0.302363	spi
chr2R	6544948	6545148	201	-0.437435	0.0785619	0.302364	jing
chr3R	87833	88033	201	-0.439889	0.0785972	0.302417	NA
chr4	459507	459707	201	-0.428666	0.0786153	0.302417	FBgn0266619
chr3L	9864526	9864726	201	-0.432463	0.0786541	0.30249	CG8108
chr3L	20384331	20384531	201	-0.43629	0.078696	0.302575	fbl
chr3R	16341909	16342109	201	-0.436034	0.0787313	0.302634	pad
chr3L	20303221	20303421	201	-0.437225	0.0788094	0.302809	SCCRO4
chr2L	22121702	22121902	201	-0.43454	0.0788316	0.302809	CG3651
chr2R	1786205	1786405	201	-0.440182	0.0788386	0.302809	NA
chr2R	20587355	20587555	201	-0.432865	0.0788623	0.302809	Nnf1a
chr2R	23574377	23574577	201	-0.438705	0.0788804	0.302809	apt
chr3R	31812202	31812402	201	-0.431213	0.0789318	0.302809	Rift
chr2L	6920580	6920780	201	-0.429466	0.078932	0.302809	Hrb27C
chr3R	10859586	10859786	201	-0.438119	0.0790249	0.302809	CG14694
chr3R	9873620	9873820	201	-0.439871	0.0790316	0.302809	Glut4EF
chr3L	21178051	21178251	201	-0.435265	0.0790512	0.302809	chb
chr3L	4322163	4322363	201	-0.435296	0.0790611	0.302809	CG15014
chr2R	14217842	14218042	201	-0.438834	0.0790766	0.302809	RpS23
chr4	43707	43907	201	-0.438337	0.0791175	0.302809	PlexB
chr3R	10600085	10600285	201	-0.439583	0.0791314	0.302809	hth
chr2L	246617	246817	201	-0.439368	0.0791323	0.302809	FBgn0265149
chr3L	3179219	3179419	201	-0.436942	0.0791695	0.302809	CG14964
chr2L	16619298	16619498	201	0.432045	0.0791849	0.302809	mtgo
chr2L	12043993	12044193	201	-0.439056	0.0791949	0.302809	CG6785
chr3R	5126083	5126283	201	-0.436891	0.0792147	0.302809	CG12007
chr2R	23745429	23745629	201	-0.432442	0.0792247	0.302809	egl
chr3L	262764	262964	201	-0.432831	0.0792252	0.302809	Tudor-SN
chr3R	19905033	19905233	201	-0.437079	0.0792338	0.302809	CG4538
chr2R	22420937	22421137	201	-0.439081	0.0792852	0.302929	mRpS29
chr3R	27958089	27958289	201	-0.434422	0.0793093	0.302946	CG4884
chr4	808229	808429	201	-0.435997	0.0794035	0.303126	Sox102F
chr3R	14032488	14032688	201	-0.434861	0.0794362	0.303126	CG3061
chr3R	20543411	20543611	201	-0.439099	0.0794424	0.303126	Stat92E
chr3R	14739827	14740027	201	-0.438358	0.0794516	0.303126	eff
chrX	10325547	10325747	201	-0.43926	0.0794561	0.303126	CG2909
chr2L	10548797	10548997	201	-0.434162	0.0794916	0.303186	Trim9
chr3L	2438962	2439162	201	-0.438493	0.0795464	0.303319	Svil
chr2R	19357375	19357575	201	-0.438476	0.0796049	0.303449	CG11961
chr2L	20734183	20734383	201	-0.433144	0.0796204	0.303449	TM9SF2
chrX	22444040	22444240	201	-0.438972	0.0796535	0.3035	CG14621
chr3L	264667	264867	201	-0.433002	0.0797056	0.30351	miple1
chr2R	14974585	14974785	201	-0.437173	0.0797159	0.30351	ckn
chr3R	16359261	16359461	201	-0.437659	0.0797182	0.30351	CG10311
chr3L	11562593	11562793	201	-0.436824	0.0797547	0.30351	CG7394
chr2L	16656681	16656881	201	-0.430923	0.0797582	0.30351	mtgo
chr2R	21466556	21466756	201	-0.434211	0.0797758	0.30351	Sdc
chr3L	14982662	14982862	201	-0.434087	0.0798087	0.30356	mnd
chr3R	11665600	11665800	201	-0.431533	0.0799058	0.303853	CG42327
chr2R	17581850	17582050	201	-0.430144	0.0799863	0.303881	Dcr-2
chr2R	24113423	24113623	201	-0.437761	0.0800325	0.303881	CG4049
chr3L	20841516	20841716	201	-0.432209	0.0800399	0.303881	CSN3
chrX	10366541	10366741	201	-0.435613	0.0801278	0.303881	l(1)G0289
chr2L	5602482	5602682	201	-0.426159	0.0801349	0.303881	DIP-eta
chr3R	4433809	4434009	201	-0.436472	0.0801732	0.303881	eIF3a
chr3R	3880631	3880831	201	-0.436398	0.0801862	0.303881	NA
chr3R	19315008	19315208	201	-0.436606	0.0801865	0.303881	Dl
chr2L	19508586	19508786	201	-0.436177	0.0801922	0.303881	cyst
chr3L	15837387	15837587	201	-0.425417	0.0802574	0.304052	CG18081
chr3R	15654958	15655158	201	-0.437143	0.0803375	0.304276	NA
chr3L	1516552	1516752	201	-0.436842	0.0804026	0.304276	cue
chr3R	25056091	25056291	201	-0.437563	0.0804084	0.304276	CG31109
chr3L	15514959	15515159	201	-0.427136	0.0804107	0.304276	NA
chr3L	11416574	11416774	201	0.431239	0.0804163	0.304276	NA
chr3L	207563	207763	201	-0.434278	0.0805945	0.304803	Gk1
chr3L	16483582	16483782	201	-0.435167	0.0805954	0.304803	aos
chr3L	9888623	9888823	201	-0.429514	0.0806575	0.30493	Taf2
chr3R	7246873	7247073	201	-0.429292	0.0806714	0.30493	CG1234
chrX	20724630	20724830	201	-0.436286	0.0806891	0.30493	NA
chr3L	2123260	2123460	201	0.430447	0.0807398	0.304986	zormin
chr3L	3320036	3320236	201	-0.43342	0.0807445	0.304986	PIG-C
chr2R	17145702	17145902	201	-0.43637	0.0807639	0.304986	FBgn0050234
chr3L	20006299	20006499	201	-0.435007	0.0809809	0.305692	kug
chr3L	1349964	1350164	201	-0.436017	0.080991	0.305692	312
chr3L	5807109	5807309	201	-0.436909	0.0810331	0.305723	S6k
chr3R	7066987	7067187	201	-0.435375	0.0810546	0.305723	CG1105
chr2R	12027860	12028060	201	-0.436796	0.081079	0.305723	Mppe
chr3R	18274588	18274788	201	-0.429114	0.0810985	0.305723	eIF1A
chr3R	23787562	23787762	201	-0.436771	0.0810995	0.305723	mbc
chr2R	4728912	4729112	201	-0.434091	0.0811561	0.30578	Nipped-B
chr2R	19570208	19570408	201	-0.425564	0.0811825	0.30578	sm
chr2L	8276112	8276312	201	-0.429195	0.0812123	0.30578	Btk29A
chr2R	13239721	13239921	201	-0.428692	0.0812191	0.30578	CG4679
chr3R	11378624	11378824	201	-0.436655	0.0812211	0.30578	pros
chr2R	5041422	5041622	201	-0.431881	0.0812351	0.30578	NA
chr2R	20832373	20832573	201	-0.424955	0.0812769	0.305782	insc
chr4	979945	980145	201	-0.435426	0.0812895	0.305782	fuss
chrX	3835491	3835691	201	-0.433109	0.0812956	0.305782	ec
chr3R	10627972	10628172	201	-0.423799	0.0813326	0.305797	hth
chr3R	30066023	30066223	201	-0.435238	0.0813616	0.305797	sima
chr3L	23580684	23580884	201	-0.435857	0.0813673	0.305797	AGO3
chr3R	29869238	29869438	201	-0.431511	0.0813801	0.305797	Zip99C
chr3L	2766894	2767094	201	-0.432291	0.0814448	0.305965	Non2
chr2R	23898184	23898384	201	-0.436182	0.0815063	0.30612	CG5339
chr2L	6323606	6323806	201	-0.432648	0.0815312	0.306136	PDZ-GEF
chr2L	11794033	11794233	201	-0.433075	0.0815506	0.306136	Tsp33B
chr3L	17040391	17040591	201	-0.429946	0.0816358	0.306267	Papst2
chr2L	11475069	11475269	201	-0.435864	0.0816457	0.306267	NA
chr2R	13502247	13502447	201	-0.435755	0.08169	0.306285	drk
chr3L	4170293	4170493	201	-0.431926	0.0817389	0.306285	mas
chr3R	28888591	28888791	201	-0.433013	0.0817537	0.306285	CG33203
chr3L	17425121	17425321	201	-0.435478	0.0817594	0.306285	CG7630
chr3R	18915868	18916068	201	-0.434129	0.081764	0.306285	Sgsh
chr2L	826476	826676	201	-0.435629	0.0817711	0.306285	dock
chr3L	18822505	18822705	201	-0.426416	0.0818332	0.306442	Cat
chr3R	15688553	15688753	201	-0.435281	0.0818617	0.306473	pxb
chr3R	23730155	23730355	201	-0.432193	0.0819024	0.306551	CG10365
chr3L	9898520	9898720	201	-0.432002	0.0819448	0.306634	CG6707
chr2R	5664362	5664562	201	-0.43364	0.0819891	0.306724	Not3
chr3R	9986236	9986436	201	-0.43294	0.0820177	0.306755	Art4
chr3L	6955807	6956007	201	-0.425743	0.0820376	0.306755	Surf1
chr3R	18170279	18170479	201	-0.433724	0.0820651	0.306783	wrd
chr3L	17860653	17860853	201	0.427192	0.082145	0.307006	NA
chr2L	10221238	10221438	201	-0.432724	0.0821695	0.307023	Npc1a
chr2R	19631886	19632086	201	-0.434012	0.0822533	0.30712	sm
chr2R	13960533	13960733	201	-0.433552	0.0822904	0.30712	Cp1
chr3L	21449302	21449502	201	-0.422985	0.082301	0.30712	NA
chr2R	13990376	13990576	201	-0.432647	0.0823086	0.30712	mam
chr2L	20800284	20800484	201	-0.431402	0.0823165	0.30712	CG9328
chr2R	5980711	5980911	201	-0.430791	0.0823491	0.307145	mle
chr3L	12138361	12138561	201	-0.434595	0.0824002	0.307145	ND-SGDH
chr3L	3411102	3411302	201	-0.434237	0.0824068	0.307145	sty
chr4	415539	415739	201	-0.432205	0.0824155	0.307145	NA
chr3L	20495275	20495475	201	-0.429338	0.0824325	0.307145	ZnT77C
chr2L	8072824	8073024	201	-0.432783	0.0824631	0.307145	Trf
chr2L	9912477	9912677	201	-0.43308	0.0824643	0.307145	Srp54
chrX	14247998	14248198	201	-0.432501	0.0825057	0.307163	mud
chr4	446007	446207	201	-0.424475	0.0825096	0.307163	CaMKI
chr2L	9715472	9715672	201	-0.431974	0.0825294	0.307163	Nckx30C
chr3L	160693	160893	201	-0.434173	0.0826046	0.307292	p130CAS
chr2R	19310570	19310770	201	-0.431282	0.0826613	0.307402	EndoB
chr3L	18186068	18186268	201	-0.432932	0.0826854	0.307402	hid
chrX	2262750	2262950	201	-0.433976	0.0827	0.307402	CG3078
chr2R	6523698	6523898	201	-0.434194	0.0827169	0.307402	jing
chrX	927493	927693	201	-0.434332	0.0827352	0.307402	MED22
chr2R	24661371	24661571	201	-0.431515	0.0827703	0.307402	CG3663
chr3R	27288671	27288871	201	-0.428239	0.0828369	0.307402	Hmu
chr2L	10397422	10397622	201	-0.433609	0.0828831	0.307402	Cnot4
chr3L	17015922	17016122	201	-0.431479	0.0828865	0.307402	CG6664
chr3R	18402643	18402843	201	-0.434265	0.0828868	0.307402	Wdr37
chr2L	19865748	19865948	201	-0.433137	0.0828964	0.307402	sick
chr3R	26912782	26912982	201	-0.430432	0.0830064	0.307736	Ets97D
chr2L	819849	820049	201	-0.433671	0.0830753	0.307847	Clp
chr3L	16452103	16452303	201	-0.433968	0.0830769	0.307847	CG33158
chr3R	6932821	6933021	201	-0.433184	0.0830986	0.307852	Antp
chr2R	16109755	16109955	201	-0.428535	0.0831338	0.307908	Asph
chr3L	16052152	16052352	201	-0.430355	0.0831873	0.307991	Mbs
chr2L	3072328	3072528	201	-0.425679	0.0832579	0.308048	toc
chr4	397880	398080	201	-0.432462	0.0832726	0.308048	dati
chr2R	15350047	15350247	201	-0.433425	0.0834334	0.308091	unc-5
chr2R	11636065	11636265	201	-0.433428	0.0834409	0.308091	CG9005
chr2L	3452364	3452564	201	-0.427984	0.0834419	0.308091	CG12795
chr3R	24851507	24851707	201	-0.428998	0.0834702	0.308091	CG7006
chr3R	5591636	5591836	201	-0.429315	0.0834799	0.308091	noi
chr3R	9637537	9637737	201	-0.422144	0.0834868	0.308091	Scm
chr2L	12172986	12173186	201	-0.429153	0.0834894	0.308091	bru1
chr2R	13006531	13006731	201	-0.433371	0.0835142	0.308091	Su(z)2
chr3L	11414908	11415108	201	0.430157	0.0835189	0.308091	NA
chr3L	15509497	15509697	201	-0.426923	0.0835336	0.308091	MsrA
chr2L	7915064	7915264	201	-0.432057	0.0835527	0.308091	Snoo
chr2R	14173562	14173762	201	-0.43268	0.083605	0.308091	cg
chr3L	20405297	20405497	201	-0.419877	0.083608	0.308091	FBgn0267635
chr3R	8863272	8863472	201	-0.425163	0.0836169	0.308091	FBgn0053551
chr3R	30797654	30797854	201	-0.424724	0.083622	0.308091	wts
chr3R	5551396	5551596	201	-0.430443	0.0836278	0.308091	mia
chr2L	6338673	6338873	201	-0.431857	0.0837058	0.308102	Cpr
chrX	13234061	13234261	201	-0.433	0.083721	0.308102	mew
chr2R	17740241	17740441	201	-0.425997	0.0837532	0.308102	Hyccin
chr3L	21554923	21555123	201	-0.431054	0.0837595	0.308102	Wnk
chr2R	10075563	10075763	201	-0.423983	0.0837635	0.308102	CG1371
chr3L	7641574	7641774	201	-0.428055	0.083769	0.308102	CG7506
chr3R	21141428	21141628	201	-0.425256	0.0837725	0.308102	SNF4Agamma
chr2L	7063856	7064056	201	-0.427908	0.083806	0.30815	Sem1
chr2R	17419484	17419684	201	-0.429583	0.0838258	0.30815	l(2)k01209
chr2L	13904322	13904522	201	-0.426574	0.0838871	0.308301	Ance
chr3R	21223548	21223748	201	-0.430839	0.0839113	0.308315	CG3337
chr2R	11609135	11609335	201	-0.430729	0.0839622	0.308355	tou
chr2R	14307444	14307644	201	-0.4323	0.0839627	0.308355	Shrm
chr2R	13239399	13239599	201	-0.431096	0.0840247	0.308455	CG4679
chr2R	8913944	8914144	201	-0.429781	0.0840344	0.308455	lin
chr3R	21138326	21138526	201	-0.43171	0.0840504	0.308455	meigo
chrX	5085631	5085831	201	-0.432031	0.0840932	0.308537	CG15465
chr3R	4458395	4458595	201	-0.429246	0.0842078	0.308735	CG31522
chr2R	15821414	15821614	201	-0.431807	0.084229	0.308735	tun
chr3L	17846436	17846636	201	-0.429495	0.0842482	0.308735	CG5567
chr3L	5970605	5970805	201	-0.428349	0.0843239	0.308875	CG10479
chr3R	30765609	30765809	201	-0.430681	0.084327	0.308875	zfh1
chr2L	1128856	1129056	201	-0.429801	0.0844069	0.308892	Pino
chr2L	9705909	9706109	201	-0.431764	0.084416	0.308892	pelo
chr3L	17433521	17433721	201	-0.430317	0.0844218	0.308892	frc
chrX	13624290	13624490	201	-0.430957	0.0844268	0.308892	CG2691
chr3R	22462349	22462549	201	-0.420128	0.0844433	0.308892	Rpn7
chr3L	20246108	20246308	201	-0.430406	0.0844652	0.308892	rdgC
chr3R	25591591	25591791	201	-0.428948	0.0844948	0.308892	msi
chr3L	14038256	14038456	201	-0.428878	0.0845148	0.308892	Hsc70Cb
chr3R	30889069	30889269	201	-0.425605	0.0845479	0.308892	Sap-r
chr2L	22237661	22237861	201	-0.425924	0.0845616	0.308892	CG3262
chr3R	27930801	27931001	201	-0.426945	0.084621	0.308892	mino
chr3R	25851493	25851693	201	-0.42883	0.084637	0.308892	CG5886
chr3L	5621590	5621790	201	-0.431255	0.0846413	0.308892	NA
chr2L	1362349	1362549	201	-0.427229	0.0846853	0.308892	CG31659
chr2L	15271273	15271473	201	-0.419083	0.0847178	0.308892	Cul3
chr3R	29997838	29998038	201	-0.431639	0.0847349	0.308892	CG7903
chr3L	5834696	5834896	201	-0.42206	0.0847374	0.308892	vn
chr2L	4227595	4227795	201	-0.422962	0.0847635	0.308892	RpL40
chr3R	22042064	22042264	201	-0.428665	0.0847727	0.308892	how
chr2L	1066376	1066576	201	-0.429975	0.0847894	0.308892	S
chr3L	3223522	3223722	201	-0.429383	0.0847903	0.308892	RpL28
chr3L	8720144	8720344	201	-0.430864	0.0848226	0.308892	SrpRbeta
chr3L	15224830	15225030	201	-0.430586	0.084823	0.308892	NA
chr3R	8833459	8833659	201	-0.428732	0.0848384	0.308892	pyd
chr2R	16202829	16203029	201	-0.431109	0.0849646	0.309278	Shark
chr3R	22035572	22035772	201	-0.425202	0.0850261	0.309315	CG6015
chr3R	7933679	7933879	201	-0.420851	0.085042	0.309315	dsx
chr2R	8053366	8053566	201	-0.430463	0.0850998	0.309315	CG12769
chrX	8681422	8681622	201	-0.430353	0.0851122	0.309315	CAH3
chrX	16787384	16787584	201	-0.426683	0.085133	0.309315	CG9609
chr2L	16743563	16743763	201	-0.427659	0.0851733	0.309315	BuGZ
chr3L	5152540	5152740	201	-0.430561	0.0851814	0.309315	Srp54k
chr2L	17748867	17749067	201	-0.429579	0.0851948	0.309315	CadN
chr2L	1080812	1081012	201	-0.426338	0.0851982	0.309315	S
chr3L	13925296	13925496	201	-0.430533	0.0852693	0.309453	Rgl
chr3L	21706291	21706491	201	-0.422409	0.0852766	0.309453	CG32447
chr2L	12032251	12032451	201	0.427348	0.0853229	0.309547	dmGlut
chr3R	4204244	4204444	201	-0.428238	0.0853691	0.309598	beta-Man
chrX	19153588	19153788	201	-0.430678	0.0854039	0.309598	RhoGAP18B
chrX	17124867	17125067	201	-0.430544	0.0854135	0.309598	CG5004
chr3L	13403606	13403806	201	-0.429333	0.0854184	0.309598	sens
chr3R	30338096	30338296	201	-0.425126	0.0854387	0.309598	hdc
chr3L	12119937	12120137	201	-0.427821	0.0855571	0.309954	CG11560
chr2R	9865524	9865724	201	-0.430133	0.0855803	0.309964	Ntmt
chrX	12611454	12611654	201	-0.429377	0.0856327	0.31008	CG1463
chr2L	4459776	4459976	201	-0.428975	0.0856601	0.310106	Gs1l
chr3R	11771524	11771724	201	-0.42617	0.085684	0.310119	l(3)neo38
chr3R	24787312	24787512	201	-0.429018	0.0857333	0.310119	CG5805
chr3L	16408963	16409163	201	-0.421301	0.0857631	0.310119	fax
chr2L	21757366	21757566	201	-0.425981	0.0857776	0.310119	CG1416
chrX	22455318	22455518	201	-0.429398	0.0858152	0.310119	Usp2
chr3R	5672197	5672397	201	-0.4301	0.0858168	0.310119	Xe7
chr3R	7088450	7088650	201	-0.429097	0.0858429	0.310119	alphaTub84B
chr3R	1392031	1392231	201	-0.418465	0.0859708	0.310119	Myo81F
chr3L	4825688	4825888	201	-0.428619	0.0859904	0.310119	LeuRS-m
chr2R	21128145	21128345	201	-0.426674	0.0860204	0.310119	mago
chr3R	26724675	26724875	201	0.424642	0.0860284	0.310119	CG6420
chr3L	5145946	5146146	201	-0.42327	0.0860307	0.310119	AlaRS-m
chr2R	13158950	13159150	201	-0.429311	0.0860942	0.310119	TppII
chr2R	19455726	19455926	201	-0.425965	0.0860982	0.310119	mei-W68
chrX	16350185	16350385	201	-0.425818	0.0861272	0.310119	sl
chr3L	12411529	12411729	201	0.426715	0.0861685	0.310119	SCaMC
chr2R	8906899	8907099	201	-0.428755	0.0861786	0.310119	CG30349
chr2R	3492908	3493108	201	-0.425653	0.0862027	0.310119	NA
chr2R	13622880	13623080	201	-0.429245	0.0862419	0.310119	CG17716
chr3R	22487083	22487283	201	-0.424974	0.0862466	0.310119	Pfdn5
chrX	13094133	13094333	201	-0.429166	0.0862619	0.310119	CG2200
chr2L	21753624	21753824	201	-0.428396	0.0862763	0.310119	step
chr3R	27637832	27638032	201	-0.425686	0.0863239	0.310119	CG5611
chr3L	17465861	17466061	201	-0.425835	0.0863295	0.310119	QIL1
chr3R	17072623	17072823	201	-0.424292	0.0863511	0.310119	Ns1
chr3R	6816264	6816464	201	-0.429347	0.086371	0.310119	FBgn0261503
chr3L	10296613	10296813	201	-0.416048	0.0863887	0.310119	FBgn0267665
chr2R	6980382	6980582	201	-0.422278	0.0864018	0.310119	vimar
chrX	14221369	14221569	201	-0.42696	0.086408	0.310119	l(1)G0007
chr3L	15968078	15968278	201	-0.419196	0.0864208	0.310119	CG10516
chr3R	23752743	23752943	201	-0.425485	0.0864255	0.310119	Rpt5
chr2R	5992755	5992955	201	-0.427388	0.0864576	0.310119	Src42A
chr2L	13387198	13387398	201	-0.429172	0.0864591	0.310119	Ing5
chr2L	5000323	5000523	201	-0.425923	0.0864837	0.310119	Rtnl1
chr2L	1504394	1504594	201	-0.426842	0.0865535	0.310197	CG7420
chr2R	18973098	18973298	201	-0.429046	0.0865864	0.310197	prod
chr3L	11609357	11609557	201	-0.424384	0.086601	0.310197	Duba
chr3R	9033658	9033858	201	-0.429021	0.0866158	0.310197	neur
chr3L	4262597	4262797	201	-0.429012	0.0866215	0.310197	CG11586
chr3L	18866065	18866265	201	-0.419213	0.08668	0.310334	CG14074
chr3L	5899387	5899587	201	-0.423194	0.0867308	0.310376	DNApol-epsilon58
chr2R	2121299	2121499	201	-0.428768	0.0867654	0.310376	CG17684
chr2L	19064826	19065026	201	-0.428808	0.0867693	0.310376	CG17343
chr2R	17766946	17767146	201	-0.428448	0.0867734	0.310376	OstDelta
chr3R	31939771	31939971	201	-0.419164	0.0868954	0.310658	heph
chr3L	8974986	8975186	201	-0.426026	0.0869169	0.310658	Srp68
chr3R	12645924	12646124	201	-0.428074	0.0869425	0.310658	Dtg
chr3L	22373170	22373370	201	-0.422159	0.0869441	0.310658	Ten-m
chr3R	21660387	21660587	201	-0.424827	0.0869743	0.310658	E2f1
chr3L	14409873	14410073	201	-0.426718	0.0869744	0.310658	stwl
chr2L	2147195	2147395	201	-0.428404	0.0870081	0.310705	TBCD
chr3L	21497156	21497356	201	-0.418774	0.0870332	0.310722	Hr78
chr2L	5525804	5526004	201	-0.428392	0.0870728	0.310791	Vps52
chr3L	17765479	17765679	201	-0.422627	0.0871008	0.310818	Adgf-A
chr2R	18799707	18799907	201	-0.427781	0.0871438	0.310899	MFS14
chr2R	19667259	19667459	201	-0.425341	0.0871966	0.31097	hrg
chr3L	361357	361557	201	-0.418887	0.0872459	0.31097	CG1233
chr2L	21863613	21863813	201	-0.421787	0.087266	0.31097	FBgn0266222
chr3R	26793829	26794029	201	-0.423017	0.087288	0.310976	NA
chr2R	7447415	7447615	201	-0.427897	0.0873191	0.310976	CG11125
chr2R	23351051	23351251	201	-0.427895	0.0873375	0.310976	CG34210
chr3R	5637185	5637385	201	-0.423683	0.0873491	0.310976	CG12170
chr2R	21170591	21170791	201	-0.423947	0.0874199	0.311104	CG4266
chr3L	11831231	11831431	201	-0.427688	0.0874258	0.311104	CycA
chr3R	16273166	16273366	201	-0.416761	0.0874611	0.311123	gish
chr4	611012	611212	201	-0.425467	0.0874735	0.311123	Eph
chr3L	4367440	4367640	201	-0.424755	0.0875137	0.311123	CG11342
chrX	654945	655145	201	-0.426475	0.0875457	0.311123	SkpA
chr3R	16049318	16049518	201	-0.424857	0.0875492	0.311123	FBgn0024222
chr2R	20698318	20698518	201	-0.423177	0.0875708	0.311123	dpr1
chr2L	8081827	8082027	201	-0.426818	0.0876217	0.311123	Bsg
chr3R	28943973	28944173	201	-0.41867	0.0876359	0.311123	DIP-gamma
chr3L	19255232	19255432	201	-0.425107	0.0876437	0.311123	mRpL21
chr3L	3970085	3970285	201	0.416707	0.0876578	0.311123	CG43915
chrX	22836641	22836841	201	-0.427544	0.0876783	0.311123	fog
chr2R	15566058	15566258	201	-0.424795	0.0877012	0.311123	CG8195
chr3L	16109704	16109904	201	-0.425644	0.0877171	0.311123	Zn72D
chr3L	13389966	13390166	201	-0.422925	0.08783	0.311451	CG10171
chr3R	8467875	8468075	201	-0.421223	0.0878701	0.311521	CG45263
chr3R	27253040	27253240	201	-0.426345	0.0879687	0.3116	pll
chr3L	22741313	22741513	201	-0.427142	0.0879795	0.3116	l(3)04053
chr2R	13979490	13979690	201	-0.420298	0.0879821	0.3116	CG6701
chr2L	20061399	20061599	201	-0.425391	0.0880353	0.3116	barr
chr2L	16352044	16352244	201	-0.420365	0.0880455	0.3116	chif
chr3R	11210152	11210352	201	-0.426768	0.0880512	0.3116	SdhC
chr3R	5568796	5568996	201	-0.426097	0.0880729	0.3116	CRMP
chr3L	9463603	9463803	201	-0.420195	0.0880911	0.3116	CG3434
chr3L	22071766	22071966	201	-0.423052	0.0880968	0.3116	CG7139
chr2R	2857984	2858184	201	-0.42132	0.0881501	0.311691	NA
chr3R	20031694	20031894	201	-0.423822	0.0881634	0.311691	trem
chr2L	12103598	12103798	201	-0.426555	0.0882663	0.311982	ThrRS
chr3L	19087033	19087233	201	-0.421553	0.0883045	0.312045	Mkp3
chr3R	11602012	11602212	201	-0.417512	0.0885085	0.312553	Jupiter
chr3R	29214421	29214621	201	-0.425918	0.0885164	0.312553	FBgn0051044
chr3L	21138867	21139067	201	-0.417506	0.088525	0.312553	Ac78C
chr3R	26536205	26536405	201	-0.425337	0.0885648	0.312553	plum
chr2R	6871285	6871485	201	-0.42571	0.0885715	0.312553	FBgn0265058
chr2L	602442	602642	201	-0.418932	0.088665	0.312648	CG13689
chr3R	10596418	10596618	201	-0.423118	0.088682	0.312648	hth
chr2L	11120244	11120444	201	-0.41895	0.0886893	0.312648	CG6230
chr3L	4040202	4040402	201	-0.424857	0.0887035	0.312648	CG11593
chrX	16104923	16105123	201	-0.426097	0.0887521	0.312648	CG42353
chr2R	21024991	21025191	201	-0.417248	0.0887577	0.312648	ND-B14.7
chrX	15852782	15852982	201	-0.425955	0.0887625	0.312648	UBL3
chr3R	4613707	4613907	201	-0.425113	0.0887932	0.312673	5-HT2A
chr2R	1150914	1151114	201	0.422282	0.088812	0.312673	NA
chr2R	15218249	15218449	201	-0.422343	0.0888311	0.312673	CG8093
chr2R	16572110	16572310	201	-0.420763	0.088877	0.3127	RpS15
chr2R	15128697	15128897	201	-0.425721	0.0888991	0.3127	chn
chr2R	9983650	9983850	201	-0.424161	0.0889207	0.3127	NA
chr2R	7825118	7825318	201	-0.424601	0.0889678	0.312708	phr
chr2R	13501959	13502159	201	-0.424454	0.0889721	0.312708	drk
chr3L	17621682	17621882	201	-0.417022	0.0889847	0.312708	Eip74EF
chr3R	7151253	7151453	201	-0.424837	0.0890113	0.31273	Sas-4
chr4	943538	943738	201	-0.424248	0.0890478	0.31278	mGluR
chr3L	10285628	10285828	201	-0.421894	0.0890685	0.31278	NA
chr3R	22877676	22877876	201	-0.422089	0.089136	0.31278	NA
chrX	2146303	2146503	201	-0.425514	0.0891409	0.31278	Pgd
chr3L	20540837	20541037	201	-0.417737	0.0891476	0.31278	Rcd2
chr4	721896	722096	201	-0.424152	0.08915	0.31278	bt
chr3R	2386060	2386260	201	-0.42474	0.0891715	0.31278	Myo81F
chr2L	8385966	8386166	201	-0.415124	0.0892231	0.31278	CG13384
chr2R	21097217	21097417	201	-0.41689	0.0892879	0.31278	CG4038
chr2R	20996340	20996540	201	-0.415773	0.0893128	0.31278	dgt3
chrX	13744571	13744771	201	-0.422101	0.0893572	0.31278	Grip91
chr3R	9577635	9577835	201	-0.423123	0.0893885	0.31278	Kap-alpha3
chr2R	24875765	24875965	201	-0.417326	0.0893898	0.31278	CG16896
chr3R	6663216	6663416	201	-0.424535	0.0893983	0.31278	lab
chr2L	15479893	15480093	201	-0.421973	0.0894043	0.31278	sna
chr2R	21056800	21057000	201	-0.422145	0.0894108	0.31278	shg
chr2L	9989856	9990056	201	-0.424698	0.0894307	0.31278	bib
chr2L	20075109	20075309	201	-0.416646	0.0894478	0.31278	pr
chr2R	12118871	12119071	201	0.423133	0.0894763	0.31278	jeb
chrX	1483312	1483512	201	-0.424623	0.0894981	0.31278	sta
chr3R	29859815	29860015	201	-0.424126	0.0895056	0.31278	dgt1
chr2R	14870506	14870706	201	-0.417368	0.0895597	0.31278	Cyp6a22
chr3L	17757445	17757645	201	-0.424917	0.0895701	0.31278	Adgf-A
chr3R	11234984	11235184	201	-0.424617	0.0895725	0.31278	Arfip
chr3L	20382085	20382285	201	-0.419214	0.08967	0.31278	fbl
chr3L	15562968	15563168	201	-0.419494	0.089685	0.31278	CG7739
chr3L	10337431	10337631	201	-0.41762	0.0897158	0.31278	FBgn0267668
chr2L	4852703	4852903	201	-0.424677	0.089737	0.31278	mRpS2
chr3R	5684580	5684780	201	-0.423564	0.0898128	0.31278	Rab23
chr2L	7535016	7535216	201	-0.422513	0.0898242	0.31278	RapGAP1
chr2R	16579636	16579836	201	-0.424577	0.0898376	0.31278	Cdk4
chr2L	4190268	4190468	201	0.421878	0.089848	0.31278	Naprt
chr3R	25056539	25056739	201	-0.421147	0.0898787	0.31278	CG31109
chr3R	30277069	30277269	201	-0.423861	0.0898977	0.31278	hdc
chr2R	21709488	21709688	201	-0.422274	0.089898	0.31278	HmgD
chr4	1167781	1167981	201	-0.417567	0.0899054	0.31278	Kif3C
chr3R	5778822	5779022	201	-0.413473	0.0899256	0.31278	CG2082
chr3L	20519324	20519524	201	-0.418411	0.0899606	0.31278	CG5059
chr3R	12219617	12219817	201	-0.419959	0.0899636	0.31278	Cog1
chr3L	17245728	17245928	201	-0.423784	0.0899696	0.31278	FBgn0264462
chr2L	5185511	5185711	201	-0.422888	0.0900148	0.312865	FBgn0082990
chr3L	22220450	22220650	201	-0.422367	0.0900915	0.313037	olf413
chr2R	16098830	16099030	201	-0.424002	0.0901051	0.313037	Dg
chr3L	27135439	27135639	201	-0.418	0.0901428	0.313096	vtd
chr2L	13227428	13227628	201	-0.420171	0.0902791	0.313478	CG15480
chr2R	7407682	7407882	201	-0.422646	0.0902937	0.313478	Eaf
chr3R	8846564	8846764	201	-0.417411	0.0903701	0.313614	pyd
chr2R	13954335	13954535	201	-0.423642	0.0903743	0.313614	mRpL53
chr2R	7519173	7519373	201	-0.422464	0.0904115	0.313672	CG1603
chr3L	6752352	6752552	201	-0.41228	0.0904705	0.313679	velo
chr3R	9496831	9497031	201	-0.416784	0.0904726	0.313679	NA
chr3R	19847203	19847403	201	-0.421168	0.0904982	0.313679	MICU3
chr3L	17011052	17011252	201	-0.423607	0.0905242	0.313679	CG3764
chr2R	9116491	9116691	201	-0.422001	0.0905646	0.313679	Su(var)2-10
chr3R	5742392	5742592	201	-0.420407	0.0905798	0.313679	Madm
chr3L	20792761	20792961	201	-0.423548	0.0906361	0.313679	Six4
chr3L	21598480	21598680	201	-0.417527	0.0906369	0.313679	TfAP-2
chr3R	21218988	21219188	201	-0.4216	0.090639	0.313679	Smyd5
chrX	2588522	2588722	201	-0.420823	0.0907211	0.313679	egh
chr3R	14717105	14717305	201	-0.417148	0.090723	0.313679	kibra
chr2L	8145369	8145569	201	-0.421107	0.0907416	0.313679	PAPLA1
chr3L	25428722	25428922	201	-0.412009	0.0907835	0.313679	lovit
chr3R	2581631	2581831	201	0.418485	0.0908123	0.313679	Pzl
chr2R	10808865	10809065	201	-0.423197	0.0908302	0.313679	wde
chr3R	1213849	1214049	201	-0.423037	0.090845	0.313679	Myo81F
chr3R	24717401	24717601	201	-0.421319	0.0908512	0.313679	tok
chr2R	17457567	17457767	201	-0.418977	0.0908792	0.313679	CG14478
chrX	9579920	9580120	201	-0.420733	0.0908879	0.313679	LPCAT
chr3L	2385718	2385918	201	-0.421789	0.0908886	0.313679	Svil
chr3R	6870864	6871064	201	-0.414417	0.0909074	0.313679	NA
chr3L	4102480	4102680	201	-0.414912	0.0909352	0.313704	CG14995
chr2R	22640058	22640258	201	-0.423057	0.0909921	0.313762	Cdk9
chr3L	27382574	27382774	201	0.411915	0.0910123	0.313762	Dbp80
chr3L	14076798	14076998	201	-0.422926	0.0910139	0.313762	btl
chr2L	181501	181701	201	-0.411221	0.0910846	0.313834	spen
chr3L	16052428	16052628	201	-0.422959	0.0910964	0.313834	Mbs
chr2R	21143491	21143691	201	-0.420227	0.0912098	0.313968	Xbp1
chr3R	6780197	6780397	201	-0.416691	0.0912175	0.313968	FBgn0263383
chr2R	11221288	11221488	201	-0.421338	0.0912454	0.313968	CG9084
chr2L	15761802	15762002	201	-0.42236	0.0912543	0.313968	Gli
chrX	16296512	16296712	201	-0.422497	0.0912716	0.313968	CG9911
chr3R	21187345	21187545	201	-0.413441	0.0912797	0.313968	SNF4Agamma
chr3L	12417485	12417685	201	-0.421392	0.0913208	0.314039	ArfGAP1
chr3L	18672353	18672553	201	-0.416762	0.0913672	0.314041	Capr
chr3R	8652622	8652822	201	-0.421095	0.0913733	0.314041	Dhod
chr2R	16343783	16343983	201	-0.421599	0.0913831	0.314041	CG7997
chr3L	4696394	4696594	201	-0.421551	0.0914507	0.314073	CG15876
chr3R	28545112	28545312	201	-0.413283	0.0914543	0.314073	mIF2
chr2R	10430340	10430540	201	-0.41815	0.0914882	0.314119	CG12896
chr4	69560	69760	201	-0.419694	0.0916201	0.3145	RpS3A
chr3L	22288543	22288743	201	-0.420195	0.0916424	0.314506	Hem
chr3R	23819601	23819801	201	-0.420685	0.0916747	0.314546	CG33111
chr2R	14482279	14482479	201	-0.422088	0.0916996	0.314561	PRAS40
chr3L	7339361	7339561	201	-0.415581	0.0918137	0.314881	lark
chr3L	13486673	13486873	201	-0.420733	0.0918444	0.314916	Abp1
chr3R	15476408	15476608	201	-0.416742	0.0919686	0.315271	AdamTS-A
chr3L	7323296	7323496	201	-0.420005	0.0920255	0.315371	RhoGEF4
chr3R	19339450	19339650	201	-0.421197	0.0920393	0.315371	NA
chr2R	24024101	24024301	201	-0.421552	0.0921514	0.315684	EbpIII
chr2R	10421460	10421660	201	-0.418717	0.0922037	0.315723	CG11825
chr2L	6922093	6922293	201	-0.417428	0.092204	0.315723	Hrb27C
chr3L	16591002	16591202	201	-0.419931	0.0922776	0.315904	tra
chr3R	20634645	20634845	201	-0.418593	0.0923057	0.315929	Pi3K92E
chr4	625624	625824	201	-0.420057	0.0923461	0.315938	mav
chr2L	7037894	7038094	201	-0.418762	0.0924047	0.31601	milt
chr3R	18242588	18242788	201	-0.41979	0.0924124	0.31601	14-3-3epsilon
chr2L	19165201	19165401	201	-0.413555	0.092434	0.316013	brat
chr2R	11198128	11198328	201	-0.410788	0.0925574	0.316234	shn
chr2L	16680377	16680577	201	-0.418471	0.0925618	0.316234	CG33552
chr3R	25097521	25097721	201	-0.417409	0.0925868	0.316234	CG33095
chr3L	19062722	19062922	201	-0.416059	0.0926007	0.316234	Ugt316A1
chrX	1613081	1613281	201	-0.420287	0.0926157	0.316234	Mur2B
chr2L	16325851	16326051	201	-0.42089	0.0926397	0.316234	cact
chr3L	17487378	17487578	201	-0.41795	0.0926812	0.316234	CG6333
chr3R	14308497	14308697	201	-0.409835	0.0926917	0.316234	su(Hw)
chr2R	11410147	11410347	201	-0.41275	0.0926977	0.316234	CG30026
chr3R	21214946	21215146	201	-0.419233	0.0927287	0.316234	CG5862
chr3R	7186586	7186786	201	-0.420593	0.0927527	0.316234	CG10055
chr3R	21338244	21338444	201	-0.413279	0.0927603	0.316234	CG16791
chr3L	19898660	19898860	201	-0.42074	0.0927769	0.316234	Su(Tpl)
chrX	1889865	1890065	201	-0.41886	0.0928242	0.316234	trr
chr2R	12916385	12916585	201	-0.413073	0.0928349	0.316234	NAT1
chr3R	10042812	10043012	201	-0.420056	0.0928514	0.316234	CG3909
chr3L	15589415	15589615	201	-0.410983	0.0929325	0.316341	CG7656
chr2L	5270305	5270505	201	-0.415899	0.0929614	0.316341	tkv
chr2R	14870970	14871170	201	-0.419053	0.092985	0.316341	Cyp6a22
chr2L	8162674	8162874	201	-0.420143	0.0930011	0.316341	Acbp1
chr3L	2458079	2458279	201	-0.411243	0.0930128	0.316341	Svil
chr2L	21630481	21630681	201	-0.41664	0.093019	0.316341	Df31
chr3R	23293029	23293229	201	-0.411618	0.0930667	0.316341	pnt
chr3R	8848202	8848402	201	-0.412906	0.0930695	0.316341	pyd
chr2L	6411240	6411440	201	-0.417545	0.093078	0.316341	CG13982
chr2R	18537496	18537696	201	-0.419541	0.0931142	0.316341	Pepck1
chr2L	18897791	18897991	201	-0.413805	0.0931246	0.316341	NA
chr3L	4313400	4313600	201	-0.412766	0.0931713	0.316341	Claspin
chr3R	11619510	11619710	201	-0.413457	0.0931758	0.316341	CG14710
chr2R	22729257	22729457	201	-0.420076	0.0931877	0.316341	jbug
chr2L	3373353	3373553	201	-0.420035	0.0931941	0.316341	GramD1B
chrX	19521718	19521918	201	-0.418525	0.0932405	0.316428	Idh3a
chr3L	9451743	9451943	201	-0.412102	0.0932612	0.316428	CG3448
chr2L	6967508	6967708	201	-0.419736	0.0934192	0.316893	smt3
chr3R	22686404	22686604	201	-0.419857	0.0934419	0.3169	CG17625
chrX	14839771	14839971	201	-0.419266	0.0935269	0.317118	CG14407
chr3L	14756393	14756593	201	-0.416637	0.0936011	0.317211	Trl
chr3L	9713744	9713944	201	-0.418365	0.0937013	0.317321	SH3PX1
chr3L	1884841	1885041	201	-0.419108	0.0937119	0.317321	Aprt
chr3R	23767653	23767853	201	-0.410364	0.0937344	0.317327	CG10214
chrX	10743908	10744108	201	-0.419422	0.0937653	0.317341	ras
chr2R	24390253	24390453	201	-0.410551	0.0937803	0.317341	mAChR-A
chr2L	18606709	18606909	201	-0.416477	0.0938144	0.317386	CG10413
chr3L	6182004	6182204	201	-0.415402	0.0938467	0.317425	D19B
chrX	17652369	17652569	201	-0.418421	0.0938814	0.317472	RhoGAPp190
chr2R	4824242	4824442	201	-0.4168	0.0939277	0.317547	CG17528
chr2R	6662171	6662371	201	-0.415764	0.0939454	0.317547	Dpit47
chr3L	3373783	3373983	201	-0.412819	0.0939745	0.317575	Ythdc1
chr3R	8976135	8976335	201	-0.418725	0.0940742	0.317793	NA
chr2R	18167095	18167295	201	-0.4168	0.0940804	0.317793	Nup75
chr3R	19157185	19157385	201	-0.410608	0.0941205	0.317801	nos
chr3R	5727929	5728129	201	-0.414585	0.0941247	0.317801	NA
chr2R	12252876	12253076	201	-0.416459	0.0942158	0.317988	CG13168
chr2L	7194571	7194771	201	-0.417334	0.0943043	0.318196	CG4497
chrX	3723092	3723292	201	-0.416854	0.0943464	0.318226	Tlk
chrX	10546722	10546922	201	-0.415764	0.0944045	0.318226	spri
chr2R	23979479	23979679	201	-0.414947	0.0944266	0.318226	Sox14
chr3L	17515360	17515560	201	-0.417242	0.0944339	0.318226	U4-U6-60K
chrX	9250284	9250484	201	-0.418509	0.0944345	0.318226	amx
chr3R	16217840	16218040	201	0.412634	0.0944583	0.318226	NA
chr3R	17826335	17826535	201	-0.418387	0.0944593	0.318226	tinc
chr2R	18357554	18357754	201	-0.414231	0.0944982	0.318262	sbb
chr3R	28345377	28345577	201	-0.417755	0.0946736	0.318695	NA
chr2L	11221458	11221658	201	-0.418047	0.0947169	0.318695	ab
chr2R	14855335	14855535	201	-0.416539	0.0947224	0.318695	SMC2
chr3R	5090371	5090571	201	-0.413921	0.0947239	0.318695	NA
chr3L	490775	490975	201	-0.4171	0.0947466	0.318701	klar
chr4	1229649	1229849	201	-0.41344	0.0947795	0.318741	Dyrk3
chr3R	7091985	7092185	201	-0.409986	0.0948378	0.318811	e(y)2b
chr3R	6668379	6668579	201	-0.418057	0.0948555	0.318811	lab
chr3L	6496291	6496491	201	-0.414842	0.0948631	0.318811	sfl
chr2R	22885944	22886144	201	-0.417999	0.0949054	0.318883	YME1L
chr2R	19840826	19841026	201	-0.417894	0.0949824	0.319039	NA
chr2R	6514540	6514740	201	-0.417739	0.0949938	0.319039	jing
chr3L	19092532	19092732	201	-0.414142	0.0950356	0.319094	MESR6
chr3R	24234004	24234204	201	-0.416646	0.095052	0.319094	mask
chr2R	17548307	17548507	201	-0.417538	0.0950794	0.319116	RpL18A
chr3R	13971978	13972178	201	-0.41531	0.0951324	0.319223	FBgn0263414
chr2L	20170020	20170220	201	-0.409971	0.0952317	0.319457	NA
chr2R	5329919	5330119	201	-0.411975	0.0952709	0.319457	NA
chr3L	17846972	17847172	201	-0.416108	0.0952741	0.319457	MED19
chr3L	9859777	9859977	201	-0.412094	0.0952863	0.319457	CG10809
chr2R	21481762	21481962	201	-0.41743	0.0953069	0.319457	Sdc
chr2L	2767755	2767955	201	-0.409651	0.0953955	0.319484	Taf10b
chr3L	19909849	19910049	201	-0.402705	0.0954772	0.319484	Su(Tpl)
chr2R	22317273	22317473	201	-0.402149	0.0954801	0.319484	Gp150
chr2L	3476481	3476681	201	-0.414981	0.0954852	0.319484	Thor
chr2L	1405431	1405631	201	-0.416398	0.0954855	0.319484	robo2
chr3R	14122536	14122736	201	-0.413225	0.0955034	0.319484	Abi
chr2L	11010961	11011161	201	-0.416187	0.0955545	0.319584	Art8
chr3L	23870394	23870594	201	-0.41386	0.0956481	0.319753	CG40470
chr3R	29675557	29675757	201	-0.407209	0.0956839	0.319753	Bub3
chr3R	13635755	13635955	201	-0.41009	0.0956889	0.319753	sqd
chrX	17651310	17651510	201	-0.415696	0.0957535	0.319899	RhoGAPp190
chr2R	17427406	17427606	201	-0.416535	0.0958524	0.319961	CG6550
chr3R	23138560	23138760	201	-0.416563	0.0958536	0.319961	hh
chr2L	9797245	9797445	201	0.409063	0.0958561	0.319961	nAChRalpha6
chr2L	11224561	11224761	201	-0.414819	0.0959087	0.320067	ab
chr3L	1777319	1777519	201	-0.415627	0.0959468	0.320084	CG13933
chr2L	9698857	9699057	201	-0.415629	0.0959558	0.320084	Pka-C1
chr3L	15953712	15953912	201	-0.412505	0.0960222	0.320235	Pka-C3
chr3R	5669529	5669729	201	-0.408578	0.0960559	0.320277	Xe7
chr3L	27135924	27136124	201	-0.416049	0.0961252	0.320438	vtd
chr3L	11696407	11696607	201	-0.415792	0.0961824	0.320559	Dph1
chr3L	22407828	22408028	201	-0.414462	0.0962878	0.320836	Ten-m
chr2R	18160599	18160799	201	-0.414432	0.0963143	0.320836	lolal
chrX	1861685	1861885	201	-0.415748	0.0963286	0.320836	CG14812
chr2R	17789583	17789783	201	-0.41435	0.096367	0.320894	Ubc10
chr3R	31580615	31580815	201	-0.404898	0.0964799	0.321096	rod
chr3L	26222988	26223188	201	-0.414599	0.0964826	0.321096	CG40160
chr3L	15712135	15712335	201	-0.414821	0.0965184	0.321096	NA
chr3L	4283626	4283826	201	-0.40793	0.0965321	0.321096	FBgn0035524
chr3L	16112281	16112481	201	-0.404919	0.0965395	0.321096	Taf4
chr2L	13550745	13550945	201	-0.415367	0.0965541	0.321096	B4
chr2L	18590791	18590991	201	-0.410026	0.0965913	0.321149	CG15160
chrX	10366009	10366209	201	-0.415713	0.0966329	0.321218	l(1)G0289
chr2L	23174306	23174506	201	-0.415764	0.0966623	0.321229	CG12567
chr3L	9125308	9125508	201	0.406735	0.0967085	0.321229	bol
chr2R	21234211	21234411	201	-0.415581	0.0967606	0.321229	ASPP
chr3L	8670219	8670419	201	-0.41523	0.0967718	0.321229	NA
chrX	11580616	11580816	201	-0.415373	0.096784	0.321229	nod
chr2R	14031503	14031703	201	-0.41402	0.0968163	0.321267	mam
chr3R	13382000	13382200	201	-0.412191	0.0968797	0.321407	CG9813
chr3R	22639254	22639454	201	-0.410846	0.0969097	0.321436	loco
chrX	5524436	5524636	201	-0.414924	0.0969858	0.321603	FBgn0086667
chr3R	21186750	21186950	201	-0.403177	0.0970022	0.321603	SNF4Agamma
chr4	1045949	1046149	201	-0.405631	0.0970585	0.321628	CaMKII
chr2L	8521531	8521731	201	-0.412015	0.0970706	0.321628	Acer
chr3R	2628945	2629145	201	-0.41226	0.0970731	0.321628	Pzl
chr2L	277190	277390	201	-0.412329	0.0971482	0.321807	smo
chr3R	29560176	29560376	201	-0.407698	0.0972106	0.321917	Dr
chr3R	7962816	7963016	201	-0.411426	0.0972325	0.321917	dsx
chr3L	27722660	27722860	201	0.413593	0.0972445	0.321917	NA
chr3R	4397806	4398006	201	-0.40633	0.0972709	0.321934	CG9855
chr3L	12723576	12723776	201	-0.414882	0.0973233	0.321967	NA
chr3L	19642705	19642905	201	-0.413766	0.0974017	0.322087	Rnf146
chr3R	11649882	11650082	201	-0.40963	0.0974904	0.322246	Elp1
chr3R	6457056	6457256	201	-0.413866	0.0975051	0.322246	CG9727
chr2R	19630663	19630863	201	-0.414674	0.09752	0.322246	sm
chr3R	20824142	20824342	201	-0.402531	0.0975385	0.322246	CG17271
chr3R	9237600	9237800	201	-0.407082	0.097566	0.322246	pum
chr3R	14898252	14898452	201	-0.412049	0.0975766	0.322246	Nup93-2
chr3L	2446789	2446989	201	-0.410406	0.0976014	0.322258	Svil
chr2R	11297458	11297658	201	-0.414051	0.0976874	0.322472	CG18336
chr3R	17539862	17540062	201	-0.414347	0.0977837	0.32269	l(3)07882
chr2L	21168528	21168728	201	-0.412445	0.0978047	0.32269	mAcon1
chr3R	30157278	30157478	201	-0.41209	0.0978326	0.32269	CG11498
chr3L	3224842	3225042	201	-0.409512	0.0978592	0.32269	RpL28
chr3L	11092829	11093029	201	-0.413089	0.0979044	0.322742	JIL-1
chr3L	7370483	7370683	201	-0.413806	0.0979174	0.322742	Sh3beta
chr2L	3872382	3872582	201	-0.414134	0.0979546	0.322773	CG31957
chr3R	19903384	19903584	201	-0.411178	0.0979806	0.322773	CG4538
chr2L	15485708	15485908	201	-0.407939	0.0979903	0.322773	Tim17b2
chr3R	18399152	18399352	201	-0.412402	0.0980874	0.322971	Vha100-2
chr2R	10871275	10871475	201	-0.410592	0.0981092	0.322971	CG30015
chr2R	10533199	10533399	201	-0.411996	0.0981354	0.322971	lola
chr2L	9984478	9984678	201	-0.413844	0.098171	0.322971	bib
chr3R	6960122	6960322	201	-0.411367	0.0981726	0.322971	Antp
chr3R	17053561	17053761	201	-0.412869	0.0981777	0.322971	Dad
chr3R	28552073	28552273	201	-0.410806	0.0982532	0.323076	NA
chr3R	21139164	21139364	201	-0.408969	0.0982798	0.323076	meigo
chr3L	3839137	3839337	201	0.405393	0.0982942	0.323076	enc
chr2R	18095293	18095493	201	-0.412894	0.0983484	0.323169	CG5757
chr2L	18838956	18839156	201	-0.413612	0.0983778	0.323169	CG10600
chr3R	5648661	5648861	201	-0.403156	0.0983952	0.323169	MTA1-like
chr2L	667764	667964	201	-0.413536	0.0984075	0.323169	ds
chr3R	5039187	5039387	201	-0.411878	0.0984326	0.323182	NA
chr3R	5283738	5283938	201	-0.413141	0.0985661	0.323455	mtd
chr2L	21855970	21856170	201	-0.413112	0.0986167	0.323494	FBgn0266222
chr3R	24318886	24319086	201	-0.413289	0.0986378	0.323494	BRWD3
chr2R	18531796	18531996	201	-0.411439	0.0986723	0.323494	Pepck2
chrX	6998530	6998730	201	-0.413176	0.0987281	0.323494	Inx2
chr3L	9729888	9730088	201	-0.412496	0.098753	0.323494	ATPsynB
chr2R	9400229	9400429	201	-0.412401	0.0988379	0.323494	Non1
chr3L	24974965	24975165	201	-0.411825	0.0988525	0.323494	ND-AGGG
chr3L	27365881	27366081	201	-0.412046	0.098854	0.323494	Dbp80
chr2L	10277491	10277691	201	-0.409999	0.0988572	0.323494	Utx
chr3R	30467133	30467333	201	-0.402355	0.0988846	0.323494	PH4alphaEFB
chr2R	21670051	21670251	201	-0.410699	0.0988932	0.323494	PIG-M
chr2L	21162950	21163150	201	-0.412624	0.0989211	0.323494	Nbr
chr3L	20310439	20310639	201	-0.412801	0.0989392	0.323494	polo
chr3L	8289780	8289980	201	-0.411359	0.0989521	0.323494	cert
chr3R	10125682	10125882	201	-0.412821	0.0990106	0.323616	knk
chr2R	15127855	15128055	201	-0.411555	0.0990727	0.323749	chn
chr3R	16815716	16815916	201	-0.407843	0.0991465	0.323819	abd-A
chrX	16303766	16303966	201	-0.412536	0.0991553	0.323819	CG3679
chr2L	8024447	8024647	201	0.4105	0.0991762	0.323819	Tg
chr3L	8825239	8825439	201	-0.412182	0.099179	0.323819	dally
chr2R	11552139	11552339	201	-0.411879	0.099265	0.32403	NA
chr3L	1380489	1380689	201	-0.409573	0.0993278	0.324113	ru
chr2R	5266042	5266242	201	-0.410053	0.0993329	0.324113	d4
chr2L	4444615	4444815	201	-0.411904	0.0994007	0.324265	morgue
chr4	557320	557520	201	-0.411755	0.0994559	0.324376	Pur-alpha
chr2R	22212448	22212648	201	-0.40807	0.0995069	0.324473	ari-2
chr3R	28635272	28635472	201	-0.40608	0.0995686	0.324543	CG10011
chr3R	545325	545525	201	-0.411297	0.0995865	0.324543	NA
chr3R	15666002	15666202	201	-0.41037	0.0995925	0.324543	pxb
chr2R	15118173	15118373	201	-0.41035	0.0996357	0.324591	chn
chr3R	22410834	22411034	201	-0.410304	0.0996676	0.324591	CG13850
chr2L	15764114	15764314	201	-0.411105	0.0996709	0.324591	Gli
chr2R	11710277	11710477	201	-0.406094	0.0996959	0.324603	pyr
chr3L	15116597	15116797	201	-0.401066	0.0997886	0.324835	Cep135
chr2L	4837897	4838097	201	-0.411069	0.0998864	0.325081	Ir25a
chr3R	29748757	29748957	201	-0.407561	0.0999069	0.325081	ATPsyngamma
chr3L	19036210	19036410	201	-0.411311	0.0999672	0.325208	nkd
chrX	17751760	17751960	201	-0.410568	0.100007	0.325269	raskol
chr2L	4221239	4221439	201	-0.411204	0.100051	0.32534	ft
chr2R	24086313	24086711	399	-0.411296	0.100077	0.325357	snama
chrX	15982800	15983000	201	-0.411332	0.100154	0.325368	CG9170
chr3R	11600520	11600720	201	-0.402292	0.100162	0.325368	Jupiter
chr2R	24875522	24875722	201	-0.405925	0.100175	0.325368	CG16896
chr2R	4411948	4412314	367	-0.409682	0.100187	0.325368	Gprk1
chr3R	30030156	30030356	201	-0.406679	0.100248	0.325496	Axn
chrX	15761118	15761318	201	-0.410174	0.10032	0.325644	Graf
chr3L	20771404	20771604	201	-0.403834	0.100346	0.325644	Pitslre
chr2R	6575176	6575376	201	-0.409607	0.100393	0.325644	jing
chr3L	21216772	21216972	201	-0.410917	0.100405	0.325644	Ilk
chr3L	27728155	27728355	201	0.399982	0.100444	0.325644	NA
chr2L	15747520	15747720	201	-0.40954	0.100454	0.325644	CycE
chrX	19652217	19652417	201	-0.410042	0.10049	0.325644	Ranbp21
chr2L	17382816	17383016	201	-0.407912	0.100493	0.325644	CLIP-190
chr2R	8671354	8671554	201	-0.406081	0.100498	0.325644	Acsl
chr2R	11106778	11106978	201	-0.410578	0.100557	0.325644	luna
chr3L	11487312	11487512	201	-0.398159	0.100567	0.325644	chrb
chr2R	4171691	4171891	201	0.40396	0.100573	0.325644	NA
chr3L	15588752	15588952	201	-0.409562	0.100593	0.325644	CG7656
chr2L	18443156	18443356	201	-0.408776	0.1006	0.325644	RpS26
chr2R	5075006	5075206	201	-0.40315	0.100614	0.325644	NA
chr2L	7258207	7258407	201	-0.407884	0.100801	0.326078	Wnt4
chr3R	22673839	22674039	201	-0.410502	0.100812	0.326078	wake
chrX	21045148	21045348	201	-0.409991	0.1009	0.326161	Cbs
chr3R	291894	292094	201	0.398727	0.100924	0.326161	NA
chr2R	8632538	8632738	201	-0.408506	0.100933	0.326161	CG8635
chr2L	10277054	10277254	201	-0.404155	0.101	0.326161	Utx
chr2L	1158649	1158849	201	-0.400089	0.101015	0.326161	Tango14
chr2L	11178891	11179091	201	-0.408758	0.101016	0.326161	CG4788
chr2L	8528411	8528611	201	-0.409948	0.101039	0.326161	CG17834
chrX	9187572	9187772	201	-0.409137	0.10104	0.326161	mei-P26
chr2R	15675967	15676167	201	-0.408376	0.101073	0.326161	fus
chr4	393568	393768	201	-0.408242	0.101109	0.326163	dati
chr3R	7086447	7086647	201	-0.408405	0.101119	0.326163	alphaTub84B
chrX	6822929	6823129	201	-0.409962	0.101138	0.326163	Nf-YC
chr3R	30466791	30466991	201	-0.404803	0.101201	0.326278	PH4alphaEFB
chr3R	12369436	12369636	201	0.400734	0.101216	0.326278	GstD1
chr3R	5126979	5127179	201	-0.403308	0.10127	0.326316	CG12007
chr2R	12870138	12870338	201	-0.409047	0.101296	0.326316	bic
chr2R	5298581	5298781	201	-0.409773	0.101302	0.326316	NA
chr3L	17476145	17476345	201	-0.408503	0.101314	0.326316	qjt
chr2L	4574588	4574788	201	-0.406653	0.101346	0.326332	dpy
chr3L	19836450	19836650	201	-0.402314	0.101379	0.326332	kto
chr2R	10582432	10582632	201	-0.409323	0.10141	0.326332	psq
chrX	8558678	8558878	201	-0.409153	0.101423	0.326332	IntS4
chr2L	12087539	12087739	201	-0.409752	0.101426	0.326332	prd
chr2L	10298400	10298600	201	-0.403657	0.101484	0.326449	CYLD
chr2L	1156296	1156496	201	-0.408506	0.101526	0.326485	Tango14
chr2R	16514628	16514828	201	-0.405117	0.101545	0.326485	Sema2a
chr3L	15803225	15803425	201	-0.404787	0.101566	0.326485	NA
chr2R	6220926	6221126	201	-0.409409	0.101581	0.326485	bin3
chr2L	21096777	21096977	201	-0.40383	0.101748	0.326856	CG34136
chr3R	23347073	23347273	201	-0.4019	0.10175	0.326856	pnt
chrX	1375400	1375600	201	-0.409167	0.101761	0.326856	AMPKalpha
chr3R	16282196	16282396	201	-0.396704	0.10183	0.326957	gish
chr2R	9291475	9291675	201	-0.408459	0.10184	0.326957	Mad1
chr2R	11252210	11252410	201	-0.409309	0.10187	0.326957	Cpr47Ea
chrX	21315941	21316141	201	-0.40922	0.101878	0.326957	Rpt6
chr2R	23376843	23377043	201	-0.406277	0.101958	0.327144	Golgin245
chr3R	23156968	23157168	201	-0.408989	0.101986	0.327168	unk
chr2L	8718011	8718211	201	0.403447	0.102014	0.327186	raw
chr2L	13373714	13373914	201	-0.408745	0.102051	0.327237	ND-B22
chr3R	8747637	8747837	201	-0.405913	0.102102	0.327242	CG9801
chr2L	10430833	10431033	201	-0.406791	0.102129	0.327242	TfIIB
chr2R	24174767	24174967	201	-0.408912	0.102134	0.327242	FBgn0026169
chr3L	19910152	19910352	201	-0.405398	0.102138	0.327242	Su(Tpl)
chr3R	29263539	29263739	201	-0.407161	0.102247	0.327285	NA
chr2L	815868	816068	201	-0.402548	0.102249	0.327285	Saf6
chrX	5665897	5666097	201	-0.408501	0.102258	0.327285	CG4119
chr2R	16579317	16579517	201	-0.40749	0.102259	0.327285	Cdk4
chr3R	19335521	19335721	201	-0.399822	0.102314	0.327393	NA
chr3L	4186799	4186999	201	-0.405493	0.102358	0.327464	tipE
chr2L	10262890	10263281	392	-0.406159	0.102399	0.327527	Rsf1
chr2R	12569772	12569972	201	-0.406223	0.102524	0.327858	stil
chr3L	15832896	15833096	201	-0.406181	0.102603	0.327985	CG12713
chr3R	23921255	23921455	201	-0.398252	0.102623	0.327985	sba
chr3R	23747339	23747539	201	-0.402433	0.102657	0.327985	Hmgcr
chr3L	14968109	14968309	201	-0.407631	0.102662	0.327985	Tom
chr2L	6178629	6178829	201	-0.40631	0.102671	0.327985	smal
chr2L	1737301	1737501	201	0.408182	0.102719	0.328067	CG17646
chr3R	1564477	1564677	201	0.401282	0.102756	0.328095	Myo81F
chr2L	20683036	20683236	201	-0.397097	0.102781	0.328095	Cen
chr3L	4133919	4134119	201	-0.405925	0.10281	0.328095	ens
chr3R	31738078	31738278	201	-0.404823	0.102814	0.328095	eEF1alpha2
chr2L	67274	67474	201	-0.407116	0.102853	0.328096	Cda5
chr3L	11244099	11244299	201	-0.402503	0.102859	0.328096	FBgn0265924
chr2L	4682596	4682796	201	-0.401982	0.102878	0.328096	CG11929
chr2L	6723260	6723460	201	-0.400493	0.102958	0.328282	homer
chrY	969838	970038	201	-0.400929	0.103036	0.328459	NA
chr3L	11833388	11833588	201	-0.407801	0.103132	0.328564	CycA
chr2R	18135588	18135788	201	-0.406595	0.103135	0.328564	Hsf
chr2R	12687178	12687378	201	-0.402244	0.103154	0.328564	Nup188
chr3L	15044051	15044251	201	-0.407759	0.103155	0.328564	ind
chr2R	15898029	15898229	201	-0.406227	0.103304	0.32897	CG33463
chr2R	2147856	2148056	201	0.393228	0.103393	0.329107	CG17684
chr2R	8079950	8080150	201	-0.406864	0.10342	0.329107	Vps28
chr2L	3159523	3159723	201	-0.403541	0.10343	0.329107	Mad
chr3R	9240204	9240404	201	-0.404346	0.10344	0.329107	D1
chr3R	21625639	21625839	201	-0.406554	0.103455	0.329107	E2f1
chr2R	22053262	22053462	201	0.406038	0.103532	0.329258	NA
chr2L	3833980	3834180	201	-0.396793	0.103545	0.329258	slp2
chr2R	13449935	13450135	201	-0.401235	0.103709	0.329591	cnn
chr2L	12540349	12540549	201	-0.402056	0.103717	0.329591	bun
chr3R	6854342	6854542	201	-0.406228	0.103725	0.329591	NA
chr2L	386338	386538	201	0.39932	0.103743	0.329591	al
chr3L	17621422	17621622	201	-0.400354	0.103785	0.329592	Eip74EF
chr3R	34945	35145	201	0.400562	0.10387	0.329592	NA
chr3L	653995	654195	201	-0.40368	0.103874	0.329592	CG3402
chr3L	3038126	3038326	201	-0.405478	0.103877	0.329592	CG2162
chr3L	4003352	4003552	201	-0.406476	0.103895	0.329592	CG14985
chr2R	17852315	17852515	201	-0.406424	0.103907	0.329592	olf186-F
chr2L	6070946	6071146	201	-0.405296	0.10391	0.329592	CG9150
chrX	15736935	15737135	201	-0.40672	0.103965	0.329697	Arp6
chrX	17635894	17636094	201	-0.406669	0.104022	0.329809	CG8289
chr3L	5458914	5459114	201	-0.401939	0.104058	0.329855	NA
chr2R	16519056	16519256	201	-0.40488	0.104116	0.329973	Sema2a
chr3R	15937893	15938093	201	0.396298	0.104148	0.330005	Sap47
chrX	7969573	7969773	201	-0.406146	0.104215	0.330147	sn
chr3L	1397591	1397791	201	-0.4016	0.10428	0.330201	FBgn0011851
chrX	21350157	21350357	201	-0.405052	0.104299	0.330201	sol
chr4	89808	90008	201	-0.404924	0.104313	0.330201	pan
chr3R	4434380	4434580	201	-0.405866	0.104328	0.330201	eIF3a
chr3L	17597022	17597222	201	-0.401799	0.104393	0.330201	Eip74EF
chr3R	5120553	5120753	201	-0.405725	0.104414	0.330201	NA
chr3L	19583948	19584148	201	-0.404136	0.104463	0.330201	Shal
chr2R	11795637	11795837	201	-0.405877	0.10447	0.330201	ths
chr2R	11602294	11602494	201	-0.402143	0.104515	0.330201	tou
chr3R	891760	891960	201	0.403693	0.104543	0.330201	Myo81F
chr2L	21624496	21624696	201	-0.398819	0.104544	0.330201	CG2201
chr2L	6323910	6324110	201	-0.404443	0.104553	0.330201	PDZ-GEF
chr2L	10339337	10339537	201	-0.40585	0.104561	0.330201	SamDC
chr2R	19451491	19451691	201	-0.403802	0.104596	0.330201	CG7744
chr2L	3171034	3171234	201	-0.4043	0.1046	0.330201	CG15404
chr3L	21460644	21460844	201	-0.405984	0.104628	0.330221	NA
chr3R	105082	105282	201	-0.397238	0.104684	0.330284	NA
chr2R	11789924	11790124	201	-0.404292	0.104691	0.330284	Ir48c
chr3R	22043054	22043254	201	-0.405052	0.104808	0.330397	how
chr2R	6219405	6219605	201	-0.400669	0.104821	0.330397	bin3
chr2L	6956852	6957052	201	-0.405741	0.104836	0.330397	CG13775
chr2L	564020	564220	201	-0.405711	0.104874	0.330404	CG11835
chrX	17738017	17738217	201	-0.404871	0.104893	0.330404	raskol
chr3R	24290076	24290276	201	-0.402436	0.104903	0.330404	CG34290
chr3L	17042704	17042904	201	-0.395751	0.104925	0.330407	Papst2
chr3R	8857008	8857208	201	-0.405564	0.105014	0.330575	pyd
chr3R	1995263	1995463	201	0.398987	0.105053	0.330575	Myo81F
chr2R	6823106	6823306	201	-0.400003	0.105053	0.330575	FBgn0265635
chr2L	230802	231002	201	-0.405023	0.105278	0.330847	CG13693
chr2L	9946017	9946217	201	-0.403877	0.10528	0.330847	CG5853
chr3L	24976068	24976268	201	-0.405169	0.105295	0.330847	ND-AGGG
chr3L	5789647	5789847	201	-0.401209	0.105306	0.330847	Cralbp
chr3R	18298306	18298506	201	-0.404708	0.105326	0.330847	l(3)05822
chr3R	10112374	10112574	201	-0.401779	0.105358	0.330879	Fmr1
chr2L	2045369	2045569	201	-0.404955	0.105384	0.330893	Kebab
chr3R	6875441	6875641	201	-0.400332	0.105424	0.330951	NA
chr3L	3303637	3303837	201	-0.397725	0.105477	0.331025	CG14968
chr3R	31945735	31945935	201	-0.401451	0.105491	0.331025	heph
chr4	1060823	1061023	201	-0.401669	0.105592	0.3311	Zyx
[truncated: 13,083 more rows]

## Sheet: DA w ZLD NC14 12min
ATAC-seq (wt vs. zld- DA)							ChIP-seq (ZLD)
Chromosome	ChromStart	ChromEnd	ATACpeakSize	FC	FDR	GeneName	Chromosome	ChromStart	ChromEnd	PeakScore	OverlapReagion
chr2L	5506	6046	541	-0.7459	0.0206	FBgn0031208	chr2L	5532	5932	117.572	400
chr2L	18560	18716	157	-0.7562	0.01423	l(2)gl	chr2L	18423	18805	114.872	156
chr2L	27923	28472	550	-2.5717	3.35e-42	Ir21a	chr2L	28010	28357	73.128	347
chr2L	222929	223483	555	-0.898	6.13e-06	FBgn0265153	chr2L	222975	223361	57.042	386
chr2L	518116	518919	804	-1.653	2.57e-24	ush	chr2L	518180	518771	91.962	591
chr2L	519120	519502	383	-1.54	1.1e-13	ush	chr2L	519292	519708	41.511	210
chr2L	543850	544276	427	-2.2158	5.44e-26	lwr	chr2L	544030	544303	53.024	246
chr2L	597860	598170	311	-0.5428	0.02086	NA	chr2L	597755	598143	84.449	283
chr2L	713354	713874	521	-1.0891	0.0002798	FBgn0266323	chr2L	713496	713903	164.919	378
chr2L	849802	850323	522	-1.4945	5.27e-20	drongo	chr2L	849854	850360	149.624	469
chr2L	1076448	1076895	448	-1.5131	5.84e-14	S	chr2L	1076466	1076787	54.518	321
chr2L	1117497	1117715	219	-2.4796	7.59e-21	Pino	chr2L	1117586	1117725	96.868	129
chr2L	1119551	1120218	668	-2.7966	7.21e-58	Pino	chr2L	1119567	1120241	130.815	651
chr2L	1410181	1410293	113	-2.0835	1.15e-10	robo2	chr2L	1410021	1410265	45.255	84
chr2L	1410694	1411566	873	-2.8729	4.75e-66	robo2	chr2L	1410678	1412071	426.91	872
chr2L	1411759	1412078	320	-1.619	6.76e-19	robo2	chr2L	1410678	1412071	426.91	312
chr2L	1421460	1422019	560	-2.5367	1.14e-51	robo2	chr2L	1421415	1422237	136.077	559
chr2L	1422137	1422355	219	-0.7328	0.001638	robo2	chr2L	1421415	1422237	136.077	100
chr2L	1461965	1462170	206	-1.2397	4.04e-05	NA	chr2L	1461829	1462713	55.843	205
chr2L	1517569	1518498	930	-3.4361	4.25e-92	halo	chr2L	1517873	1518468	173.207	595
chr2L	1525075	1525642	568	-3.9464	1.37e-71	NA	chr2L	1525224	1525503	49.094	279
chr2L	1886392	1886930	539	-2.4364	1.12e-25	Wdr62	chr2L	1886364	1886815	44.234	423
chr2L	2037904	2038347	444	-1.015	5.95e-10	Su(dx)	chr2L	2037849	2038366	77.691	443
chr2L	2155421	2156206	786	-2.4143	1.82e-42	CG15382	chr2L	2155426	2156082	41.511	656
chr2L	2161380	2161820	441	-1.1014	4.6e-07	aop	chr2L	2161349	2161813	89.061	433
chr2L	2164655	2165486	832	-2.324	3.58e-46	aop	chr2L	2164533	2165501	212.139	831
chr2L	2172250	2172879	630	-2.283	7.7e-36	aop	chr2L	2172348	2172889	130.961	531
chr2L	2175466	2175679	214	-1.4828	5.83e-08	aop	chr2L	2175520	2175876	269.263	159
chr2L	2453505	2453740	236	-1.3887	2.16e-10	dpp	chr2L	2453498	2453716	45.255	211
chr2L	2454385	2455146	762	-0.575	0.01635	dpp	chr2L	2454430	2455114	270.261	684
chr2L	2456320	2457443	1124	-1.8621	2.92e-37	dpp	chr2L	2456293	2457466	128.806	1123
chr2L	2576448	2576914	467	-2.0545	4.34e-29	Rad1	chr2L	2576510	2576933	148.944	404
chr2L	2577126	2577471	346	-1.6268	5.76e-14	Rad1	chr2L	2577203	2578076	85.736	268
chr2L	2577621	2578287	667	-2.3694	1.5e-52	Rad1	chr2L	2577203	2578076	85.736	455
chr2L	2750607	2751225	619	-1.749	6.03e-19	Bacc	chr2L	2750467	2751176	95.113	569
chr2L	2752757	2752909	153	-0.6715	0.007264	Bacc	chr2L	2752299	2753593	307.608	152
chr2L	2814686	2815347	662	-2.4261	6.08e-33	G6P	chr2L	2814891	2815123	49.283	232
chr2L	3071595	3072807	1213	-2.1377	2.26e-42	toc	chr2L	3072165	3072612	82.809	447
chr2L	3465537	3466267	731	-0.8499	4.62e-05	msl-2	chr2L	3465819	3466134	48.013	315
chr2L	3476292	3476872	581	-1.222	9.58e-08	Thor	chr2L	3476354	3476684	41.511	330
chr2L	3606425	3607144	720	-0.8491	3.05e-05	odd	chr2L	3606414	3607252	368.526	719
chr2L	3610559	3611187	629	-2.0223	1.7e-44	NA	chr2L	3610514	3611379	203.281	628
chr2L	3611981	3612094	114	-0.6015	0.03605	NA	chr2L	3611893	3612197	91.962	113
chr2L	3771003	3771403	401	-0.6075	0.00482	bowl	chr2L	3771041	3772054	130.961	362
chr2L	3822196	3822844	649	-1.3924	5.39e-12	slp1	chr2L	3822200	3822611	61.145	411
chr2L	3833771	3834284	514	-1.1268	4.81e-09	slp2	chr2L	3833785	3834293	120.88	499
chr2L	4028785	4029010	226	-0.6667	0.01073	ed	chr2L	4028774	4029160	185.049	225
chr2L	4031202	4031532	331	-0.537	0.01209	ed	chr2L	4031178	4032134	318.788	330
chr2L	4031747	4032119	373	-0.5531	0.01651	ed	chr2L	4031178	4032134	318.788	372
chr2L	4034399	4034841	443	-1.6442	6.84e-14	ed	chr2L	4034414	4034857	56.451	427
chr2L	4055737	4056081	345	-1.5159	1.75e-12	ed	chr2L	4055763	4056018	61.145	255
chr2L	4226849	4227127	279	-0.5267	0.04125	RpL40	chr2L	4226920	4227121	49.094	201
chr2L	4280476	4280764	289	-1.8002	7.24e-15	tutl	chr2L	4280554	4280735	45.255	181
chr2L	4281830	4282381	552	-2.6486	1.98e-40	tutl	chr2L	4282138	4283371	78.332	243
chr2L	4282824	4283302	479	-1.228	1.07e-09	tutl	chr2L	4282138	4283371	78.332	478
chr2L	4363641	4364282	642	-2.4884	2.67e-33	Traf4	chr2L	4363612	4364272	115.919	631
chr2L	4366584	4366942	359	-2.0773	5.28e-15	Traf4	chr2L	4366749	4366957	37.869	193
chr2L	4367979	4368290	312	-1.6466	4.01e-10	Traf4	chr2L	4368011	4368251	37.869	240
chr2L	4368506	4369135	630	-1.6156	6.08e-18	Traf4	chr2L	4368568	4369282	69.589	567
chr2L	4370039	4370310	272	-1.429	2.9e-07	Traf4	chr2L	4370028	4370342	46.877	271
chr2L	4371736	4372137	402	-0.6649	0.04324	Traf4	chr2L	4371792	4372121	99.229	329
chr2L	4378331	4378839	509	-2.525	8.45e-23	Traf4	chr2L	4378438	4378758	106.162	320
chr2L	4684106	4684730	625	-4.1509	1.38e-65	Bsg25A	chr2L	4684345	4684688	101.369	343
chr2L	4687275	4687814	540	-3.6254	5.63e-42	Bsg25A	chr2L	4687289	4687773	87.353	484
chr2L	4823589	4824243	655	-2.7766	1.68e-40	CG15628	chr2L	4823666	4824262	78.332	577
chr2L	4889404	4889925	522	-3.24	1.12e-58	CG15625	chr2L	4889462	4889875	78.332	413
chr2L	4891728	4892403	676	-1.0657	4.71e-09	CG3036	chr2L	4891945	4892345	53.024	400
chr2L	5000018	5000538	521	-2.1662	7.13e-33	Rtnl1	chr2L	5000070	5000994	198.049	468
chr2L	5000690	5001027	338	-2.1673	6.81e-24	Rtnl1	chr2L	5000070	5000994	198.049	304
chr2L	5001340	5001461	122	-0.9428	0.001079	Rtnl1	chr2L	5001308	5001608	58.477	121
chr2L	5235060	5235333	274	-2.0706	1.23e-15	tkv	chr2L	5234787	5235183	53.024	123
chr2L	5276852	5277719	868	-2.7893	1.88e-51	Bsg25D	chr2L	5277281	5277644	77.561	363
chr2L	5410215	5410765	551	-1.4196	5.47e-12	H15	chr2L	5410522	5410744	51.884	222
chr2L	5546856	5547310	455	-0.5467	0.03521	Oscillin	chr2L	5546914	5547340	49.094	396
chr2L	5550615	5551098	484	-2.757	3.23e-50	CG14014	chr2L	5550698	5551081	130.961	383
chr2L	5551875	5552112	238	-2.3853	1.24e-19	GluRIIA	chr2L	5551777	5552208	53.024	237
chr2L	5870725	5871293	569	-2.5494	6.98e-33	rau	chr2L	5871051	5871268	42.674	217
chr2L	5877523	5878011	489	-3.1331	3.76e-38	rau	chr2L	5877658	5877897	49.283	239
chr2L	5879331	5879634	304	-1.189	2.45e-06	rau	chr2L	5879347	5879662	39.755	287
chr2L	5978170	5978660	491	-1.35	3.37e-10	chic	chr2L	5978344	5979338	73.924	316
chr2L	6229377	6229834	458	-3.0373	1.94e-27	FBgn0266070	chr2L	6229378	6229789	73.924	411
chr2L	6372870	6374281	1412	-3.8519	2.72e-106	slam	chr2L	6373156	6374159	136.077	1003
chr2L	6611297	6611742	446	-0.6653	0.0009201	CG11050	chr2L	6611435	6611733	40.616	298
chr2L	7009683	7010960	1278	-0.945	2.01e-12	uif	chr2L	7009696	7010148	63.631	452
chr2L	7009683	7010960	1278	-0.945	2.01e-12	uif	chr2L	7010540	7010833	49.094	293
chr2L	7048561	7048624	64	-1.7636	0.008721	milt	chr2L	7048551	7049044	78.867	63
chr2L	7526074	7526586	513	-2.3245	1.55e-18	RapGAP1	chr2L	7526149	7526554	141.945	405
chr2L	7543911	7545021	1111	-0.7809	1.78e-07	RapGAP1	chr2L	7543999	7544915	265.409	916
chr2L	7633021	7633344	324	-1.6891	1.07e-10	FBgn0266034	chr2L	7632932	7633333	37.869	312
chr2L	8143933	8144321	389	-3.2643	3.24e-34	PAPLA1	chr2L	8143984	8144296	64.01	312
chr2L	8145216	8145780	565	-2.8826	3.57e-51	PAPLA1	chr2L	8145232	8145654	61.145	422
chr2L	8209307	8209635	329	-2.2141	9.74e-20	Su(var)205	chr2L	8209342	8209657	45.255	293
chr2L	8274695	8275038	344	-2.1933	5.39e-22	Btk29A	chr2L	8274692	8275059	53.024	343
chr2L	8276072	8276668	597	-1.9269	2.71e-22	Btk29A	chr2L	8276202	8276693	55.612	466
chr2L	8277581	8277787	207	-0.7467	0.01132	Btk29A	chr2L	8277648	8277911	49.094	139
chr2L	8478418	8478778	361	-1.3834	2.75e-09	FBgn0051896	chr2L	8478089	8478868	49.094	360
chr2L	8510370	8510746	377	-3.0691	1.23e-36	CG13096	chr2L	8510452	8510762	41.511	294
chr2L	8521851	8522304	454	-1.1428	5.46e-10	Acer	chr2L	8521917	8522267	45.255	350
chr2L	8809666	8810260	595	-1.3378	6.18e-13	NA	chr2L	8809864	8810245	162.375	381
chr2L	8832032	8832923	892	-2.0861	1.26e-32	NA	chr2L	8832260	8832884	130.961	624
chr2L	8841624	8842300	677	-2.2188	5.04e-24	NA	chr2L	8841379	8842332	177.573	676
chr2L	8846690	8847293	604	-2.9265	8.7e-53	NA	chr2L	8846749	8847294	87.236	544
chr2L	8851993	8852519	527	-0.7652	0.002913	FBgn0266905	chr2L	8852315	8852560	45.255	204
chr2L	9121030	9121311	282	-3.0081	2.06e-16	FBgn0265826	chr2L	9121050	9121236	48.013	186
chr2L	9126117	9126479	363	-2.23	1.26e-14	CG32982	chr2L	9125298	9126370	223.301	253
chr2L	9145779	9146120	342	-2.3162	3.57e-14	CG32982	chr2L	9145793	9146792	74.387	327
chr2L	9146261	9146973	713	-3.43	7.32e-54	CG32982	chr2L	9145793	9146792	74.387	531
chr2L	9421268	9421841	574	-1.7119	1.06e-13	Mco1	chr2L	9421379	9421689	82.809	310
chr2L	9448157	9448433	277	-1.8835	2.26e-15	numb	chr2L	9448121	9448409	110.219	252
chr2L	9449029	9449464	436	-1.047	5.54e-08	numb	chr2L	9448984	9450120	223.941	435
chr2L	9449690	9450019	330	-0.9676	2.85e-05	numb	chr2L	9448984	9450120	223.941	329
chr2L	9454270	9454952	683	-2.07	2.27e-32	numb	chr2L	9454264	9454896	140.097	626
chr2L	9495388	9495604	217	-0.9563	9.9e-05	Gdi	chr2L	9495339	9495664	57.011	216
chr2L	9496383	9496698	316	-0.8557	0.0003323	Gdi	chr2L	9496387	9496646	37.869	259
chr2L	9988064	9988867	804	-2.6167	1.16e-46	bib	chr2L	9988025	9989176	207.368	803
chr2L	9989712	9990166	455	-2.7437	7.13e-34	bib	chr2L	9989362	9990692	53.024	454
chr2L	10058487	10059347	861	-3.043	7.32e-54	Spn31A	chr2L	10058684	10059121	53.024	437
chr2L	10544546	10544630	85	-1.0164	0.03613	Trim9	chr2L	10544386	10545094	286.185	84
chr2L	10548700	10549339	640	-2.7782	6.3e-52	Trim9	chr2L	10548719	10548971	48.175	252
chr2L	10841870	10842395	526	-1.1595	1.49e-10	CG6700	chr2L	10841687	10842402	71.324	525
chr2L	11070835	11071320	486	-3.5648	1.41e-48	CG14915	chr2L	11070937	11071161	45.255	224
chr2L	11074983	11075657	675	-3.5823	1.89e-75	CG43725	chr2L	11075060	11075545	91.962	485
chr2L	11225341	11225703	363	-1.5233	5.61e-07	ab	chr2L	11225233	11225758	53.024	362
chr2L	11452574	11453118	545	-1.1889	1.31e-15	NA	chr2L	11452631	11453392	106.162	487
chr2L	11455263	11456170	908	-1.8597	1.74e-35	NA	chr2L	11455396	11455956	90.286	560
chr2L	11485938	11486727	790	-3.0842	1.56e-50	sala	chr2L	11485974	11486305	123.8	331
chr2L	11793780	11794330	551	-1.7947	1.08e-30	crol	chr2L	11793935	11794312	130.961	377
chr2L	11970789	11971438	650	-0.7779	3.35e-05	FBgn0263019	chr2L	11970779	11971335	122.203	546
chr2L	12080970	12081701	732	-1.2618	4.34e-14	FBgn0265801	chr2L	12081056	12081733	167.77	645
chr2L	12085719	12086034	316	-0.672	0.01401	prd	chr2L	12085709	12086076	174.099	315
chr2L	12435445	12435859	415	-0.8593	1.29e-05	eRF3	chr2L	12435461	12435785	50.571	324
chr2L	12459780	12460242	463	-1.5028	8.91e-12	bun	chr2L	12459939	12460384	57.042	303
chr2L	12461170	12461554	385	-0.7916	0.0001064	bun	chr2L	12461116	12461503	41.511	333
chr2L	12466504	12466948	445	-2.6237	1.32e-38	bun	chr2L	12466628	12466921	41.511	293
chr2L	12666050	12666693	644	-1.5862	3.56e-10	pdm2	chr2L	12666142	12666523	53.024	381
chr2L	13211438	13211958	521	-1.0981	1.4e-07	FBgn0004191	chr2L	13211543	13212243	96.026	415
chr2L	13212107	13212259	153	-1.4753	1.23e-06	FBgn0004191	chr2L	13211543	13212243	96.026	136
chr2L	13215710	13215848	139	-1.0001	0.002481	FBgn0004192	chr2L	13215669	13216271	223.59	138
chr2L	13216005	13216347	343	-1.7822	2.92e-09	FBgn0004192	chr2L	13215669	13216271	223.59	266
chr2L	13224928	13225866	939	-2.3051	1.52e-40	Ski6	chr2L	13224806	13226014	375.935	938
chr2L	13227007	13227842	836	-2.1145	3.48e-43	CG15480	chr2L	13226879	13227934	472.461	835
chr2L	13229302	13229935	634	-2.4619	3.53e-53	CG16815	chr2L	13229264	13230059	385.714	633
chr2L	13234622	13235442	821	-2.0366	9.06e-30	CG5867	chr2L	13234583	13235400	111.012	778
chr2L	13244549	13245259	711	-1.242	5.56e-09	FBgn0003935	chr2L	13244293	13245060	164.267	511
chr2L	13904155	13904808	654	-1.6449	1.69e-15	Ance	chr2L	13904279	13904768	54.349	489
chr2L	14261779	14262399	621	-2.1621	4.59e-25	wb	chr2L	14261871	14262454	144.122	528
chr2L	14262942	14263149	208	-0.7008	0.002668	wb	chr2L	14262909	14263243	82.809	207
chr2L	14443769	14444310	542	-0.9134	4.89e-07	NA	chr2L	14443689	14444361	106.162	541
chr2L	14445556	14446325	770	-0.7861	3.02e-06	NA	chr2L	14445579	14446559	83.797	746
chr2L	14489062	14489469	408	-0.7504	1.94e-05	noc	chr2L	14489000	14489556	130.961	407
chr2L	14508785	14509181	397	-0.9809	9.31e-05	NA	chr2L	14508679	14509216	45.255	396
chr2L	15013421	15013953	533	-0.973	1.11e-06	GABA-B-R1	chr2L	15013542	15013908	810.026	366
chr2L	15319581	15320278	698	-1.3428	9.9e-11	nht	chr2L	15319900	15320158	57.042	258
chr2L	15333257	15334028	772	-0.6102	0.003824	esg	chr2L	15333242	15334025	198.802	768
chr2L	15478144	15478701	558	-1.0156	1.11e-09	sna	chr2L	15477945	15478675	261.617	531
chr2L	15479590	15480360	771	-1.1774	2.14e-14	sna	chr2L	15479621	15480258	173.207	637
chr2L	15485604	15486560	957	-1.2198	1.33e-09	Tim17b2	chr2L	15485591	15485974	106.162	370
chr2L	15731628	15732325	698	-1.3447	3.63e-13	CycE	chr2L	15731558	15732348	157.023	697
chr2L	15742787	15743540	754	-2.3573	6.69e-39	CycE	chr2L	15742829	15743565	66.153	711
chr2L	15761785	15762017	233	-0.7836	0.003451	Gli	chr2L	15761837	15762043	37.869	180
chr2L	15762294	15762837	544	-1.0109	6.36e-07	Gli	chr2L	15762407	15762715	79.201	308
chr2L	16323365	16323913	549	-1.8193	1.73e-25	cact	chr2L	16323511	16323897	96.635	386
chr2L	16329681	16330281	601	-2.1852	6.26e-31	mRpL4	chr2L	16329743	16330195	91.962	452
chr2L	16352890	16353209	320	-1.0267	8.29e-08	chif	chr2L	16352070	16353173	69.589	283
chr2L	16353817	16354160	344	-2.5043	6.54e-30	chif	chr2L	16353837	16354110	67.279	273
chr2L	16405593	16406313	721	-3.4614	5.53e-67	CG5888	chr2L	16405959	16406292	43.949	333
chr2L	16859130	16859569	440	-1.9021	1.74e-09	CG31809	chr2L	16859252	16859501	43.472	249
chr2L	17222091	17222798	708	-2.9182	2.09e-42	beat-IIIc	chr2L	17222163	17222560	73.41	397
chr2L	17262271	17262686	416	-1.5952	3.32e-12	beat-IIIc	chr2L	17262223	17262709	71.31	415
chr2L	17263315	17263820	506	-1.7346	5.71e-16	beat-IIIc	chr2L	17263401	17263806	73.329	405
chr2L	17740375	17740845	471	-2.7298	7.93e-35	CadN	chr2L	17740420	17740864	57.042	425
chr2L	17743560	17744159	600	-2.6738	1.97e-38	CadN	chr2L	17743858	17744112	65.328	254
chr2L	17748759	17749142	384	-2.5687	3.83e-26	CadN	chr2L	17748741	17749208	78.332	383
chr2L	18145210	18145805	596	-1.4822	1.08e-10	Socs36E	chr2L	18145398	18145805	65.328	407
chr2L	18150341	18150796	456	-0.6238	0.008873	CG17681	chr2L	18150454	18150786	49.094	332
chr2L	18369531	18369931	401	-1.9178	4.28e-13	Fas3	chr2L	18369530	18369910	53.024	379
chr2L	18486666	18487260	595	-2.7269	1.12e-49	CG10283	chr2L	18486767	18487075	37.869	308
chr2L	18596869	18597257	389	-2.8159	9.32e-40	amos	chr2L	18596504	18597357	267.403	388
chr2L	18598163	18598553	391	-2.0926	3.79e-25	amos	chr2L	18598100	18598602	151.195	390
chr2L	18599079	18599501	423	-2.9405	5.63e-42	amos	chr2L	18599058	18599481	91.644	402
chr2L	18875051	18875649	599	-2.5001	3.99e-30	tup	chr2L	18875032	18875681	63.317	598
chr2L	18895275	18895824	550	-2.409	9.96e-34	FBgn0265950	chr2L	18895169	18895816	131.423	541
chr2L	19154714	19155444	731	-0.6135	0.0101	brat	chr2L	19154865	19155438	115.211	573
chr2L	19156197	19156525	329	-0.6564	0.03557	brat	chr2L	19156261	19156485	49.301	224
chr2L	19161289	19161773	485	-0.5911	0.005817	brat	chr2L	19161301	19161626	73.924	325
chr2L	19162459	19162807	349	-1.3048	2.47e-11	brat	chr2L	19162418	19162688	41.511	229
chr2L	19322593	19323139	547	-2.3143	7.52e-27	FBgn0267264	chr2L	19322591	19323117	61.145	524
chr2L	19323498	19324083	586	-2.7206	1.74e-40	FBgn0267264	chr2L	19323356	19324145	329.218	585
chr2L	19324879	19325088	210	-2.356	4.34e-14	FBgn0266796	chr2L	19324850	19325176	66.756	209
chr2L	19326838	19327301	464	-2.7591	3.14e-35	FBgn0266796	chr2L	19326851	19327307	95.461	450
chr2L	19333803	19334389	587	-1.7934	1.46e-16	NA	chr2L	19333758	19334395	85.736	586
chr2L	19337705	19338041	337	-3.3942	5.46e-32	NA	chr2L	19337940	19338863	152.955	101
chr2L	19338113	19338750	638	-2.1172	2.38e-24	dnt	chr2L	19337940	19338863	152.955	637
chr2L	19341129	19341750	622	-2.7004	9.37e-35	dnt	chr2L	19341224	19341945	78.332	526
chr2L	19700799	19701161	363	-3.563	3.66e-34	Lar	chr2L	19700855	19701305	73.924	306
chr2L	19701267	19701481	215	-1.7413	3.99e-09	Lar	chr2L	19700855	19701305	73.924	38
chr2L	19810452	19811005	554	-1.6446	2.71e-19	FBgn0003923	chr2L	19810578	19811034	91.962	427
chr2L	19811672	19811839	168	-1.6443	2.21e-05	FBgn0003923	chr2L	19811805	19812099	61.145	34
chr2L	19815805	19816532	728	-2.0308	1.21e-19	FBgn0003922	chr2L	19815392	19816797	325.339	727
chr2L	19816619	19816880	262	-1.3985	5.51e-06	FBgn0003922	chr2L	19815392	19816797	325.339	178
chr2L	19866638	19867124	487	-1.6915	1.52e-16	sick	chr2L	19866568	19867141	91.962	486
chr2L	19937887	19938388	502	-1.8908	1.38e-14	sick	chr2L	19937947	19938239	53.024	292
chr2L	20486057	20486717	661	-1.1537	2.54e-07	FBgn0262455	chr2L	20486104	20486634	82.809	530
chr2L	20768412	20769364	953	-1.9143	4.36e-34	cad	chr2L	20768341	20769340	205.93	928
chr2L	20770259	20770894	636	-0.7741	4.94e-06	cad	chr2L	20770262	20770960	901.628	632
chr2L	20916824	20917270	447	-1.0815	7.17e-07	sky	chr2L	20916884	20917217	62.142	333
chr2L	21618648	21619288	641	-2.2236	3.99e-30	CG2201	chr2L	21618632	21619398	265.076	640
chr2L	21627863	21628212	350	-1.2088	6.24e-07	Df31	chr2L	21627661	21628142	63.084	279
chr2L	21630161	21630320	160	-1.8506	8.02e-07	Df31	chr2L	21629744	21630320	63.641	159
chr2L	21868627	21869308	682	-1.2726	2.9e-11	FBgn0266222	chr2L	21868763	21869337	88.193	545
chr2L	21876874	21877688	815	-2.7314	9.47e-39	NA	chr2L	21877038	21877696	116.152	650
chr2L	22151365	22152507	1143	-2.8833	2.78e-59	dunk	chr2L	22151409	22152036	130.961	627
chr2R	2496392	2496976	585	-1.1505	6.13e-09	MFS17	chr2R	2496455	2496725	78.332	270
chr2R	5937382	5938954	1573	-2.3212	1.18e-48	FBgn0264957	chr2R	5937548	5938175	59.886	627
chr2R	6193823	6194485	663	-2.4421	4.99e-31	Ptr	chr2R	6193924	6194511	111.012	561
chr2R	6195911	6196878	968	-2.1113	1.79e-31	Ptr	chr2R	6196207	6196719	37.869	512
chr2R	6514464	6514925	462	-3.2589	1.53e-41	jing	chr2R	6514544	6514849	82.809	305
chr2R	6516406	6517018	613	-2.1612	5.71e-29	jing	chr2R	6516405	6517049	64.559	612
chr2R	6527775	6528476	702	-2.2929	9.32e-24	jing	chr2R	6527936	6528214	41.511	278
chr2R	6573046	6574170	1125	-2.8742	7.51e-53	jing	chr2R	6573009	6574149	285.229	1103
chr2R	6575151	6575440	290	-0.9513	0.0001293	jing	chr2R	6574994	6575462	45.255	289
chr2R	6600368	6600957	590	-2.9627	3.23e-50	CG15233	chr2R	6600487	6601009	57.042	470
chr2R	6612829	6613283	455	-1.0997	2.75e-07	jing	chr2R	6612754	6613226	188.901	397
chr2R	6627155	6627641	487	-2.2044	5.04e-36	CG33919	chr2R	6627285	6627604	51.884	319
chr2R	6810913	6811136	224	-0.6801	0.003824	ubl	chr2R	6810873	6811234	53.024	223
chr2R	6813577	6814330	754	-2.979	9.27e-60	koi	chr2R	6813880	6814416	125.8	450
chr2R	7380431	7381001	571	-1.1857	3.82e-12	Dscam1	chr2R	7380595	7381059	120.88	406
chr2R	7485966	7486170	205	-2.956	4.87e-26	wech	chr2R	7486016	7487105	380.294	154
chr2R	7486231	7486718	488	-2.3962	1.49e-35	wech	chr2R	7486016	7487105	380.294	487
chr2R	7487846	7488274	429	-0.9433	5.51e-07	wech	chr2R	7487831	7488323	68.434	428
chr2R	7488664	7488736	73	-0.629	0.0437	wech	chr2R	7488583	7489139	45.255	72
chr2R	7490487	7490987	501	-1.2208	1.28e-10	wech	chr2R	7490481	7490880	88.144	393
chr2R	8121976	8123194	1219	-0.8174	1.32e-06	Nup50	chr2R	8122061	8122596	91.16	535
chr2R	8121976	8123194	1219	-0.8174	1.32e-06	Nup50	chr2R	8122789	8123079	45.255	290
chr2R	8129441	8130155	715	-2.9228	1.06e-57	Pabp2	chr2R	8129560	8129929	46.022	369
chr2R	8233356	8233891	536	-2.3812	3.25e-48	dpn	chr2R	8233213	8234064	223.941	535
chr2R	8245945	8246695	751	-1.2378	6.19e-14	FBgn0265638	chr2R	8245890	8246527	53.191	582
chr2R	8247946	8248493	548	-0.9828	5.48e-06	NA	chr2R	8248036	8248222	37.495	186
chr2R	8654752	8655094	343	-1.6179	6.76e-14	ptc	chr2R	8654613	8655043	53.024	291
chr2R	8655506	8656387	882	-1.6627	2.24e-26	ptc	chr2R	8655399	8656945	381.121	881
chr2R	8657750	8658246	497	-1.6364	3.77e-25	ptc	chr2R	8657687	8658392	117.232	496
chr2R	9414186	9414979	794	-0.7504	0.0004492	wun	chr2R	9414297	9414577	61.145	280
chr2R	9490848	9491512	665	-1.0121	8.03e-06	Wnt2	chr2R	9490869	9491065	53.024	196
chr2R	9977087	9977890	804	-2.1659	3.54e-43	eve	chr2R	9976821	9978429	204.921	803
chr2R	9980830	9980976	147	-2.0578	1.09e-13	FBgn0264599	chr2R	9980790	9981391	49.094	146
chr2R	9986136	9986456	321	-0.6149	0.007308	TER94	chr2R	9985915	9986661	96.635	320
chr2R	10077029	10077814	786	-0.9453	6.93e-10	CG1371	chr2R	10077057	10077390	51.884	333
chr2R	10078112	10078487	376	-0.5295	0.04361	CG1371	chr2R	10078164	10078559	87.353	323
chr2R	10468260	10468686	427	-0.9352	9.81e-07	Caf1-105	chr2R	10468395	10468713	40.233	291
chr2R	10485152	10485769	618	-1.0494	1.81e-08	pre-lola-G	chr2R	10485083	10485761	344.968	609
chr2R	10486288	10487154	867	-1.0694	1.51e-08	pre-lola-G	chr2R	10486244	10487106	164.476	818
chr2R	10536013	10536397	385	-0.6719	7.06e-05	FBgn0263466	chr2R	10534733	10536484	312.098	384
chr2R	10581462	10582062	601	-1.5787	3.89e-26	psq	chr2R	10581488	10581997	118.845	509
chr2R	10582340	10582725	386	-0.9073	2.08e-06	psq	chr2R	10582304	10582626	74.72	286
chr2R	10584259	10584536	278	-0.9697	4.07e-05	psq	chr2R	10584242	10584546	111.993	277
chr2R	10596013	10596737	725	-2.3589	5.37e-33	psq	chr2R	10596069	10597326	101.369	668
chr2R	10596847	10596916	70	-2.0963	0.03049	psq	chr2R	10596069	10597326	101.369	69
chr2R	10810865	10811154	290	-0.6042	0.009928	wde	chr2R	10810827	10811173	70.235	289
chr2R	10843865	10844404	540	-3.0479	8.83e-47	CG30015	chr2R	10843933	10844378	85.736	445
chr2R	10898956	10899265	310	-1.5237	4.17e-09	ND-B14	chr2R	10899021	10899333	94.162	244
chr2R	11100384	11100943	560	-1.2833	5.74e-10	luna	chr2R	11100520	11100836	142.962	316
chr2R	11182657	11183111	455	-2.782	1.39e-43	shn	chr2R	11182711	11183083	141.243	372
chr2R	11184773	11185043	271	-0.8006	0.008527	shn	chr2R	11184618	11184891	789.608	118
chr2R	11188984	11189321	338	-2.4628	8.96e-27	shn	chr2R	11189049	11189244	41.511	195
chr2R	11191433	11192071	639	-2.9301	1.62e-63	shn	chr2R	11191389	11192017	212.357	584
chr2R	11198870	11199414	545	-1.2084	9.53e-15	shn	chr2R	11198149	11199444	208.312	544
chr2R	11237417	11238053	637	-3.1693	7.79e-42	CG13217	chr2R	11237500	11237970	229.848	470
chr2R	11306923	11307601	679	-0.8876	1.45e-06	Fpps	chr2R	11307074	11307536	61.145	462
chr2R	11397234	11397549	316	-0.5192	0.03938	sprt	chr2R	11397279	11397680	78.332	270
chr2R	11397738	11398122	385	-0.7121	0.0009178	sprt	chr2R	11397828	11398146	41.511	294
chr2R	11398552	11399291	740	-2.2877	3.08e-28	FBgn0050506	chr2R	11398851	11399207	41.453	356
chr2R	11455450	11456031	582	-2.7851	5.64e-50	E(Pc)	chr2R	11455506	11456045	61.145	525
chr2R	11732983	11733403	421	-2.311	5.81e-25	NA	chr2R	11733101	11733370	65.328	269
chr2R	11794008	11794660	653	-1.7729	7.55e-23	ths	chr2R	11794011	11794668	204.128	649
chr2R	11981954	11982606	653	-2.2199	5.18e-31	CG30036	chr2R	11982036	11982565	69.589	529
chr2R	12173229	12173401	173	-0.971	0.0004729	CCT5	chr2R	12172646	12173443	54.349	172
chr2R	12452990	12453455	466	-1.1856	9.1e-10	Lac	chr2R	12452952	12453363	82.809	373
chr2R	12454826	12455379	554	-3.074	2.19e-44	Lac	chr2R	12454871	12455381	101.369	508
chr2R	12530482	12531167	686	-2.1555	2.13e-36	fra	chr2R	12530703	12531172	73.924	464
chr2R	12779743	12780757	1015	-1.0759	7.15e-12	sca	chr2R	12779880	12780210	41.511	330
chr2R	12779743	12780757	1015	-1.0759	7.15e-12	sca	chr2R	12780388	12780703	72.486	315
chr2R	12915734	12916065	332	-0.7193	0.004904	NAT1	chr2R	12915951	12916173	41.511	114
chr2R	13019108	13019683	576	-1.1153	3.46e-07	NA	chr2R	13019177	13019703	73.924	506
chr2R	13194814	13195276	463	-1.8335	1.67e-18	Kdm4B	chr2R	13194826	13195318	223.473	450
chr2R	13196113	13196495	383	-2.36	6.95e-30	ValRS	chr2R	13196202	13196460	108.562	258
chr2R	13224138	13224535	398	-1.0601	1.3e-06	Dp	chr2R	13224257	13224535	37.869	278
chr2R	13447636	13448241	606	-3.2523	8.06e-59	cnn	chr2R	13447882	13448302	65.328	359
chr2R	13449183	13449582	400	-1.3181	6.04e-15	cnn	chr2R	13449249	13449557	64.517	308
chr2R	13555402	13556238	837	-3.4019	4.69e-76	Roe1	chr2R	13555584	13556169	109.42	585
chr2R	13557988	13558219	232	-0.8811	0.0006387	CG13334	chr2R	13557919	13558213	39.188	225
chr2R	13560486	13560858	373	-2.1226	1.91e-13	CG13334	chr2R	13559949	13562738	186.626	372
chr2R	13561110	13561902	793	-2.3491	4e-27	NA	chr2R	13559949	13562738	186.626	792
chr2R	13562489	13562578	90	-2.8039	2.89e-10	NA	chr2R	13559949	13562738	186.626	89
chr2R	13563104	13563578	475	-2.9026	2e-23	NA	chr2R	13562889	13564907	410.732	474
chr2R	13563642	13564123	482	-2.7279	2.27e-32	NA	chr2R	13562889	13564907	410.732	481
chr2R	13564345	13564844	500	-1.7835	1.34e-11	NA	chr2R	13562889	13564907	410.732	499
chr2R	13565699	13566204	506	-1.9649	9.2e-18	NA	chr2R	13565755	13566215	119	449
chr2R	13566611	13566890	280	-2.5456	2.08e-18	NA	chr2R	13566458	13571376	376.831	279
chr2R	13566954	13567039	86	-2.511	7.41e-10	NA	chr2R	13566458	13571376	376.831	85
chr2R	13569136	13569300	165	-2.3181	5.63e-14	NA	chr2R	13566458	13571376	376.831	164
chr2R	13569478	13569549	72	-2.6358	1.2e-07	NA	chr2R	13566458	13571376	376.831	71
chr2R	13569651	13570486	836	-2.5187	3.43e-32	NA	chr2R	13566458	13571376	376.831	835
chr2R	13570600	13571209	610	-3.2847	1.41e-41	CG42807	chr2R	13566458	13571376	376.831	609
chr2R	13716194	13716465	272	-0.9298	0.008832	CG17716	chr2R	13716426	13716605	83.46	39
chr2R	13716544	13716861	318	-1.1817	0.002584	CG17716	chr2R	13716426	13716605	83.46	61
chr2R	13966101	13966555	455	-2.6609	1.26e-37	Cp1	chr2R	13966215	13966466	65.328	251
chr2R	14207900	14208379	480	-1.8772	6.39e-27	Sox15	chr2R	14207910	14208263	141.243	353
chr2R	14307230	14307694	465	-1.414	2.86e-10	Shrm	chr2R	14307108	14307610	70.877	380
chr2R	14307999	14308291	293	-1.1781	5.58e-09	Shrm	chr2R	14307958	14308296	89.108	292
chr2R	14311394	14311972	579	-2.4915	6.96e-41	Shrm	chr2R	14311502	14311931	102.48	429
chr2R	14312391	14312942	552	-3.2083	1.38e-65	Shrm	chr2R	14312365	14312828	90.922	437
chr2R	14429115	14429877	763	-2.6677	2.86e-42	phyl	chr2R	14429130	14429967	159.869	747
chr2R	14430639	14431458	820	-2.8318	5.67e-62	phyl	chr2R	14430708	14431516	181.455	750
chr2R	14431965	14432467	503	-1.5893	4.42e-12	phyl	chr2R	14431695	14432518	82.809	502
chr2R	14621479	14621734	256	-1.0537	0.0001145	CG12863	chr2R	14621349	14621732	37.933	253
chr2R	14963198	14963385	188	-0.9731	0.0002428	ckn	chr2R	14962810	14963266	51.194	68
chr2R	14963990	14964296	307	-0.8688	5.03e-05	ckn	chr2R	14964022	14964203	45.255	181
chr2R	14981796	14982682	887	-1.3059	1.2e-17	pcs	chr2R	14982272	14982715	65.328	410
chr2R	15127815	15128162	348	-0.9824	1.46e-05	chn	chr2R	15127808	15129057	166.613	347
chr2R	15128308	15128493	186	-0.7342	0.003623	chn	chr2R	15127808	15129057	166.613	185
chr2R	15128749	15128927	179	-1.028	1.91e-05	chn	chr2R	15127808	15129057	166.613	178
chr2R	15129557	15129995	439	-0.7472	0.01103	chn	chr2R	15129291	15130053	179.442	438
chr2R	15130680	15131224	545	-2.866	1.61e-58	chn	chr2R	15130468	15131250	291.445	544
chr2R	15131832	15132010	179	-2.7433	4.66e-21	chn	chr2R	15131667	15131998	37.869	166
chr2R	15132447	15132813	367	-2.1934	1.16e-31	chn	chr2R	15132305	15132943	197.358	366
chr2R	15132881	15132981	101	-2.3411	8.21e-12	chn	chr2R	15132305	15132943	197.358	62
chr2R	15352134	15352813	680	-2.125	2.61e-30	unc-5	chr2R	15352189	15352795	61.145	606
chr2R	15378570	15379185	616	-1.3198	2.31e-12	dup	chr2R	15378560	15379081	128.909	511
chr2R	15675778	15676557	780	-0.6472	0.002813	fus	chr2R	15675765	15676549	59.535	771
chr2R	15699722	15700126	405	-3.3592	8.23e-51	CG30080	chr2R	15699709	15700069	58.207	347
chr2R	15756369	15756877	509	-2.3323	8.53e-26	CG30089	chr2R	15756563	15756790	169.224	227
chr2R	15816776	15817351	576	-1.1755	3.15e-07	tun	chr2R	15816914	15817319	66.101	405
chr2R	15866058	15866620	563	-1.9845	1.37e-29	Rif1	chr2R	15866103	15866448	39.188	345
chr2R	15886522	15887049	528	-2.9345	7.42e-46	sli	chr2R	15886501	15887064	78.332	527
chr2R	15890752	15891404	653	-2.2649	4.12e-44	sli	chr2R	15890768	15891327	235.621	559
chr2R	15897865	15898399	535	-2.9488	2.88e-64	CG33463	chr2R	15897905	15898353	89.934	448
chr2R	15899205	15899542	338	-1.4513	1.71e-11	CG33463	chr2R	15899180	15899374	37.869	169
chr2R	15899790	15900084	295	-2.6011	4.53e-32	sli	chr2R	15899911	15900108	45.255	173
chr2R	16517094	16517381	288	-0.7173	0.001179	Sema2a	chr2R	16516924	16517394	70.592	287
chr2R	16519073	16519328	256	-2.0729	1.39e-18	Sema2a	chr2R	16519084	16519377	49.094	244
chr2R	16639864	16640482	619	-1.7893	1.83e-14	gprs	chr2R	16639952	16640392	43.271	440
chr2R	16784702	16785506	805	-1.9458	7.07e-20	CG5522	chr2R	16785113	16785341	41.511	228
chr2R	16950835	16951282	448	-2.4445	1.85e-32	Ufm1	chr2R	16950908	16951210	69.589	302
chr2R	17461341	17461599	259	-1.8214	2.61e-14	CG14478	chr2R	17461373	17461874	41.113	226
chr2R	17461685	17462144	460	-1.8936	1.12e-20	CG14478	chr2R	17461373	17461874	41.113	189
chr2R	17461685	17462144	460	-1.8936	1.12e-20	CG14478	chr2R	17462058	17462357	895.092	86
chr2R	17548175	17548719	545	-1.0692	2.6e-10	RpL18A	chr2R	17548219	17548701	73.41	482
chr2R	17679972	17680727	756	-1.2701	1.84e-15	Sema1b	chr2R	17680030	17680873	94.297	697
chr2R	17753239	17753404	166	-1.4386	0.0009959	NA	chr2R	17753203	17753572	45.255	165
chr2R	17753471	17753835	365	-1.6319	1.58e-10	Sardh	chr2R	17753203	17753572	45.255	101
chr2R	17801433	17802319	887	-0.9223	2.84e-07	grh	chr2R	17801458	17802286	429.096	828
chr2R	17803977	17804457	481	-1.4821	2.79e-14	grh	chr2R	17804135	17804865	73.924	322
chr2R	17813927	17814199	273	-0.8249	0.0001839	grh	chr2R	17813975	17814174	45.255	199
chr2R	18210754	18211491	738	-2.3113	2.34e-30	FBgn0266640	chr2R	18210765	18211390	82.809	625
chr2R	18229728	18230020	293	-1.3005	6.02e-09	fj	chr2R	18229841	18229977	113.1	136
chr2R	18293139	18293377	239	-1.4065	1.76e-07	CG14502	chr2R	18293025	18293342	45.255	203
chr2R	18299712	18300399	688	-2.604	1.67e-58	CG18540	chr2R	18299852	18300310	101.369	458
chr2R	18305870	18306532	663	-2.7399	3.57e-52	CG14505	chr2R	18305978	18306462	45.548	484
chr2R	18307169	18307499	331	-1.957	1.99e-20	sbb	chr2R	18306948	18307474	91.568	305
chr2R	18531786	18532089	304	-2.6698	6.41e-27	Pepck2	chr2R	18531894	18532077	37.869	183
chr2R	18678071	18678411	341	-0.999	0.001229	NA	chr2R	18677608	18678290	41.511	219
chr2R	18802222	18803105	884	-0.8755	3.06e-05	MFS14	chr2R	18802329	18802980	144.263	651
chr2R	19258201	19258859	659	-1.5984	1.81e-17	tbrd-2	chr2R	19258359	19258681	49.094	322
chr2R	19272360	19273247	888	-1.207	1.29e-11	rib	chr2R	19272586	19273222	101.369	636
chr2R	19273419	19273541	123	-1.0558	0.000678	rib	chr2R	19273405	19273668	61.145	122
chr2R	19661219	19662310	1092	-0.951	2.22e-10	CG11018	chr2R	19661411	19662256	178.687	845
chr2R	19668800	19669614	815	-1.1607	3.28e-18	hrg	chr2R	19668722	19670319	230.348	814
chr2R	19670060	19670319	260	-2.4945	1.68e-23	hrg	chr2R	19668722	19670319	230.348	259
chr2R	19857855	19858303	449	-2.0071	1.67e-18	FBgn0265764	chr2R	19857772	19858218	124.685	363
chr2R	20032257	20032755	499	-1.3566	2.76e-08	NA	chr2R	20032232	20032655	87.353	398
chr2R	20035231	20035880	650	-1.5657	2e-12	NA	chr2R	20035392	20035590	37.869	198
chr2R	20041100	20041751	652	-2.3748	6.67e-38	NA	chr2R	20041226	20041624	94.899	398
chr2R	20072080	20073041	962	-2.2006	3.37e-47	NA	chr2R	20072227	20072969	96.635	742
chr2R	20119479	20120048	570	-2.0466	4.8e-28	NA	chr2R	20119446	20119976	44.234	497
chr2R	20261765	20262195	431	-2.4192	4.92e-36	PCNA	chr2R	20261849	20262030	38.358	181
chr2R	20262462	20262971	510	-1.1982	3.72e-11	plu	chr2R	20262690	20262915	49.094	225
chr2R	20311593	20312108	516	-2.7843	2.34e-44	CG11200	chr2R	20311697	20312036	73.41	339
chr2R	20327690	20328711	1022	-1.8174	3.91e-33	MED8	chr2R	20327954	20328419	162.986	465
chr2R	20538949	20539671	723	-2.3448	8.13e-50	CG13427	chr2R	20539001	20539551	138.968	550
chr2R	20600771	20601166	396	-1.4627	1.11e-11	HnRNP-K	chr2R	20600670	20601070	68.418	299
chr2R	20602587	20603122	536	-0.6986	0.0001643	FBgn0262370	chr2R	20602637	20603129	109.42	485
chr2R	20604181	20604586	406	-1.869	2.2e-23	FBgn0262370	chr2R	20604055	20604559	125.895	378
chr2R	20645911	20647032	1122	-1.4816	9.81e-27	Lrt	chr2R	20646153	20646951	143.791	798
chr2R	20960751	20961689	939	-0.8647	0.0009358	hbn	chr2R	20960790	20961725	374.855	899
chr2R	21047773	21048667	895	-2.8818	1.55e-68	NA	chr2R	21047754	21048654	459.712	881
chr2R	21056469	21057018	550	-1.1479	5.01e-10	shg	chr2R	21056550	21057468	193.926	468
chr2R	21057100	21057337	238	-0.7228	0.0003104	shg	chr2R	21056550	21057468	193.926	237
chr2R	21192829	21193233	405	-2.5334	5.36e-27	tud	chr2R	21192858	21193642	148.944	375
chr2R	21193298	21193649	352	-1.0332	2.56e-05	Lapsyn	chr2R	21192858	21193642	148.944	344
chr2R	21250187	21250642	456	-0.6296	0.01056	ASPP	chr2R	21250486	21251182	146.76	156
chr2R	21250764	21251276	513	-0.8278	1.01e-05	ASPP	chr2R	21250486	21251182	146.76	418
chr2R	21282722	21283273	552	-2.3284	1.71e-35	MFS16	chr2R	21282804	21283127	57.042	323
chr2R	21363950	21364165	216	-1.1396	3.03e-07	cv-2	chr2R	21363972	21364265	72.486	193
chr2R	21364496	21364762	267	-0.8283	9.14e-05	cv-2	chr2R	21364461	21364803	271.902	266
chr2R	21367077	21367664	588	-1.2244	7.33e-14	cv-2	chr2R	21367233	21367608	57.042	375
chr2R	21523509	21524133	625	-2.2787	5.62e-40	Egfr	chr2R	21523628	21524590	199.148	505
chr2R	21524410	21524718	309	-1.4876	1.31e-13	Egfr	chr2R	21523628	21524590	199.148	180
chr2R	21525127	21525398	272	-1.2121	7.65e-05	Egfr	chr2R	21525195	21525479	61.145	203
chr2R	21538366	21538660	295	-0.6922	0.01257	Egfr	chr2R	21538379	21538610	37.869	231
chr2R	21544689	21544965	277	-2.204	1.71e-16	Egfr	chr2R	21544379	21546042	251.915	276
chr2R	21545102	21545903	802	-2.2553	2.03e-47	Egfr	chr2R	21544379	21546042	251.915	801
chr2R	21546257	21546917	661	-1.8156	2.26e-27	Egfr	chr2R	21546261	21546869	91.962	608
chr2R	22317264	22317431	168	-1.3828	1.57e-05	Gp150	chr2R	22317283	22318829	116.833	148
chr2R	22317571	22317807	237	-0.8275	0.002853	Gp150	chr2R	22317283	22318829	116.833	236
chr2R	22317953	22318420	468	-1.0309	1.45e-07	Gp150	chr2R	22317283	22318829	116.833	467
chr2R	22318519	22318906	388	-1.3503	5.83e-10	Gp150	chr2R	22317283	22318829	116.833	310
chr2R	22397674	22398093	420	-0.8642	0.0002514	babos	chr2R	22397507	22398002	45.255	328
chr2R	22507431	22508063	633	-1.2757	1.26e-07	px	chr2R	22507487	22507978	82.809	491
chr2R	22681752	22682120	369	-1.3321	4.8e-11	NA	chr2R	22681857	22682258	37.869	263
chr2R	22686909	22687079	171	-0.8816	0.000244	Ppa	chr2R	22685405	22687038	142.485	129
chr2R	22688703	22689209	507	-1.6841	6.72e-17	Ppa	chr2R	22688849	22689217	96.82	360
chr2R	22689590	22690262	673	-1.8429	1.04e-18	Ppa	chr2R	22689535	22691229	543.406	672
chr2R	22690542	22691255	714	-3.0088	8.16e-72	Ppa	chr2R	22689535	22691229	543.406	687
chr2R	22729168	22729492	325	-1.3923	5.55e-07	jbug	chr2R	22729145	22729485	48.217	317
chr2R	22802394	22802902	509	-1.3727	4.71e-15	NA	chr2R	22802338	22803562	206.953	508
chr2R	22803017	22803487	471	-1.8225	1.25e-26	NA	chr2R	22802338	22803562	206.953	470
chr2R	23044822	23045428	607	-1.2338	2.44e-12	twi	chr2R	23044951	23045393	41.511	442
chr2R	23074585	23074864	280	-0.6146	0.01204	Fib	chr2R	23074610	23074921	87.353	254
chr2R	23077650	23078027	378	-2.3813	1.87e-38	Fib	chr2R	23077732	23078021	57.042	289
chr2R	23113019	23113366	348	-0.7968	0.01504	FBgn0266008	chr2R	23113191	23113412	266.06	175
chr2R	23205950	23206273	324	-1.9368	6.31e-13	side-V	chr2R	23206083	23206264	45.255	181
chr2R	23206718	23207429	712	-1.1576	3.02e-12	side-V	chr2R	23206681	23207222	120.88	504
chr2R	23574334	23574866	533	-2.179	4.55e-31	apt	chr2R	23574417	23574653	65.061	236
chr2R	23577638	23577849	212	-0.6074	0.01831	apt	chr2R	23577800	23577952	37.199	49
chr2R	23645212	23646436	1225	-1.2368	2.66e-15	retn	chr2R	23645314	23646368	373.142	1054
chr2R	24275269	24276400	1132	-1.7208	1.13e-31	nvy	chr2R	24275285	24276305	231.189	1020
chr2R	24665470	24666508	1039	-3.3973	1.5e-74	Pof	chr2R	24665783	24666379	65.328	596
chr2R	24882465	24882960	496	-0.5892	0.003507	NKAIN	chr2R	24882529	24882855	55.855	326
chr2R	25010609	25011144	536	-0.5314	0.01554	uzip	chr2R	25010597	25011254	105.228	535
chr2R	25098203	25098751	549	-1.4121	1.75e-12	lov	chr2R	25098304	25098618	37.869	314
chr2R	25222890	25223374	485	-1.1117	7.51e-09	CG9380	chr2R	25222793	25223329	69.589	439
chr3L	297267	297493	227	-2.0467	3.95e-13	RhoGEF3	chr3L	297334	297965	57.042	159
chr3L	297658	297940	283	-1.5386	9.94e-10	RhoGEF3	chr3L	297334	297965	57.042	282
chr3L	298290	298976	687	-2.8725	1.23e-47	RhoGEF3	chr3L	298362	298715	41.157	353
chr3L	321469	321857	389	-1.7796	1.07e-25	fwd	chr3L	321536	321773	37.869	237
chr3L	489892	490534	643	-1.0932	5.32e-09	klar	chr3L	490013	490848	91.962	521
chr3L	682442	682748	307	-0.6556	0.02725	CG17129	chr3L	682503	682717	41.511	214
chr3L	698852	699379	528	-0.8581	9.98e-06	CG13894	chr3L	698989	699307	59.886	318
chr3L	699574	700087	514	-0.6736	0.0003872	CG13894	chr3L	699672	700030	96.635	358
chr3L	726267	727321	1055	-0.6173	0.009834	NA	chr3L	726376	727342	57.042	945
chr3L	744114	744757	644	-2.3737	4.08e-43	hng3	chr3L	744366	744658	38.358	292
chr3L	753521	754075	555	-1.52	1.97e-20	hng3	chr3L	753419	754052	125.895	531
chr3L	1364224	1364724	501	-1.3205	2.89e-09	Ptp61F	chr3L	1364346	1364738	65.061	378
chr3L	1447731	1448325	595	-1.6849	7.46e-12	Ptp61F	chr3L	1447881	1448224	53.024	343
chr3L	1461716	1462483	768	-1.374	1.67e-11	rho	chr3L	1461876	1462475	53.024	599
chr3L	1645815	1646408	594	-2.377	6.3e-52	Bro	chr3L	1645895	1646256	49.094	361
chr3L	1647643	1647951	309	-2.054	1.52e-14	Bro	chr3L	1647430	1648000	85.736	308
chr3L	1746241	1747049	809	-1.1796	1.11e-12	CG13921	chr3L	1746237	1747439	406.485	808
chr3L	1772431	1773123	693	-2.4964	5.25e-45	Dhc62B	chr3L	1772497	1772979	91.962	482
chr3L	2190070	2190758	689	-1.5785	5.62e-13	CG5707	chr3L	2190172	2190401	45.255	229
chr3L	2197015	2197921	907	-3.5183	3.52e-84	CG8960	chr3L	2197125	2197559	73.924	434
chr3L	2438311	2439412	1102	-2.159	1.78e-27	Svil	chr3L	2438279	2439396	82.809	1085
chr3L	2482890	2483629	740	-3.2793	3.55e-73	Svil	chr3L	2482981	2483364	96.402	383
chr3L	2882267	2882743	477	-1.5291	2.74e-18	FBgn0265724	chr3L	2882235	2882763	95.16	476
chr3L	3037209	3037469	261	-0.9862	1.01e-05	CG2162	chr3L	3037209	3037562	61.145	260
chr3L	3037664	3038570	907	-0.9343	1.63e-07	CG2162	chr3L	3037730	3038553	204.471	823
chr3L	3408704	3409149	446	-0.8988	0.0003572	sty	chr3L	3408833	3409305	38.527	316
chr3L	3409703	3410462	760	-1.8606	1.83e-18	sty	chr3L	3409802	3410490	73.924	660
chr3L	3978225	3978559	335	-2.0064	3.47e-14	NA	chr3L	3978153	3978501	37.077	276
chr3L	4062061	4062767	707	-2.4464	9.12e-31	dib	chr3L	4062104	4062416	111.012	312
chr3L	4159346	4159623	278	-1.5299	5.64e-08	nab	chr3L	4159404	4159632	41.511	219
chr3L	4167210	4167972	763	-2.3437	2.24e-49	mas	chr3L	4167332	4167765	41.511	433
chr3L	4252979	4253623	645	-0.6502	0.0004471	CG1265	chr3L	4252985	4253585	161.34	600
chr3L	4283347	4283947	601	-1.4606	2.15e-16	FBgn0035524	chr3L	4283540	4283909	73.924	369
chr3L	4408891	4409384	494	-2.948	3.91e-45	CG15019	chr3L	4408904	4409362	136.117	458
chr3L	4409801	4410187	387	-1.1916	1.23e-09	DOR	chr3L	4409641	4410322	57.042	386
chr3L	4634665	4635339	675	-1.3976	4.27e-09	CG13716	chr3L	4634770	4635093	49.094	323
chr3L	4677433	4677983	551	-2.9164	2.8e-39	CG34266	chr3L	4677445	4677907	69.589	462
chr3L	4694586	4695151	566	-2.0892	1.03e-39	CG15876	chr3L	4694644	4695224	184.208	507
chr3L	4696290	4696971	682	-1.3951	3.17e-20	CG15876	chr3L	4696294	4696933	353.066	639
chr3L	4697307	4697818	512	-1.9295	9.83e-27	CG15876	chr3L	4697224	4697784	91.962	477
chr3L	4709525	4709965	441	-1.7423	7.44e-19	CG13712	chr3L	4709774	4710133	65.328	191
chr3L	4710067	4710309	243	-2.4692	1.44e-21	CG13712	chr3L	4709774	4710133	65.328	66
chr3L	4757369	4758239	871	-1.6338	9.1e-25	CG13711	chr3L	4757379	4758023	78.332	644
chr3L	5135304	5135767	464	-2.5834	2.39e-43	CG4611	chr3L	5135483	5135672	45.255	189
chr3L	5620734	5621432	699	-2.0863	1.63e-25	NA	chr3L	5621086	5621865	61.145	346
chr3L	5621543	5621913	371	-1.9503	8.98e-17	NA	chr3L	5621086	5621865	61.145	322
chr3L	5623359	5623738	380	-2.2201	1.69e-18	NA	chr3L	5623339	5623682	69.589	323
chr3L	5630527	5631103	577	-1.0129	0.0001634	Blimp-1	chr3L	5630631	5630896	51.884	265
chr3L	5806826	5807279	454	-3.1185	1.39e-44	S6k	chr3L	5806879	5807326	45.255	400
chr3L	5932335	5932671	337	-1.0213	2.19e-07	Rcc1	chr3L	5932442	5932707	57.042	229
chr3L	5970592	5970954	363	-3.3108	5.12e-43	CG10479	chr3L	5970534	5971077	115.919	362
chr3L	5975839	5976461	623	-0.5094	0.006077	CG10479	chr3L	5975799	5976793	97.622	622
chr3L	5976679	5976915	237	-0.7373	0.01174	CG10479	chr3L	5975799	5976793	97.622	114
chr3L	6283093	6283336	244	-1.3012	0.0001868	NA	chr3L	6283060	6283246	242.262	153
chr3L	6495560	6495758	199	-0.6375	0.01027	sfl	chr3L	6495511	6495734	41.906	174
chr3L	6496026	6497036	1011	-0.9236	6.31e-10	sfl	chr3L	6495915	6496387	50.61	361
chr3L	6741944	6742059	116	-1.1908	0.00424	dikar	chr3L	6742038	6742527	56.546	21
chr3L	7908999	7909779	781	-1.7404	1.47e-22	pbl	chr3L	7909012	7909234	37.869	222
chr3L	7908999	7909779	781	-1.7404	1.47e-22	pbl	chr3L	7909389	7909639	37.869	250
chr3L	7910067	7910482	416	-1.2024	2.06e-12	pbl	chr3L	7910126	7910430	71.31	304
chr3L	7983525	7984376	852	-2.3818	1.11e-43	nmo	chr3L	7983625	7984085	56.892	460
chr3L	7988155	7988863	709	-1.9893	1.8e-25	nmo	chr3L	7988263	7988848	44.834	585
chr3L	8189148	8189704	557	-2.5898	1.51e-50	ERR	chr3L	8189326	8189645	43.271	319
chr3L	8652943	8654168	1226	-0.9726	5.23e-09	NA	chr3L	8653470	8654079	94.899	609
chr3L	8664399	8664879	481	-1.0066	2.64e-05	NA	chr3L	8664567	8664871	41.511	304
chr3L	8670029	8670544	516	-1.3379	5.01e-18	NA	chr3L	8669940	8670624	275.406	515
chr3L	8670921	8671508	588	-1.5788	1.89e-28	NA	chr3L	8670873	8671494	260.933	573
chr3L	8675209	8676054	846	-0.6122	0.02015	h	chr3L	8675422	8676077	233.566	632
chr3L	8825228	8825462	235	-0.9781	0.001132	dally	chr3L	8825259	8825447	36.967	188
chr3L	8827329	8827603	275	-0.6279	0.03194	dally	chr3L	8827355	8827598	44.234	243
chr3L	8829544	8830173	630	-2.3284	2.13e-31	dally	chr3L	8829624	8829898	49.094	274
chr3L	8832898	8833646	749	-2.0534	5.13e-26	CG32026	chr3L	8832952	8833304	67.826	352
chr3L	9004877	9005266	390	-1.7612	5.83e-16	Doc3	chr3L	9004734	9005267	185.907	389
chr3L	9028984	9029740	757	-1.0356	2.16e-06	NA	chr3L	9029032	9029722	120.88	690
chr3L	9040913	9041650	738	-0.9338	5.23e-07	Doc1	chr3L	9040883	9041699	437.076	737
chr3L	9042176	9042704	529	-1.4887	2.91e-14	Doc1	chr3L	9042323	9042695	86.45	372
chr3L	9368346	9369378	1033	-2.0956	6.47e-34	Klp67A	chr3L	9368470	9369095	58.207	625
chr3L	9461681	9462282	602	-0.619	0.0001708	CG3434	chr3L	9461683	9463017	134.83	599
chr3L	9491344	9491788	445	-1.6678	1.66e-15	CG32036	chr3L	9491317	9491662	92.431	318
chr3L	9615354	9615757	404	-1.294	3.66e-09	LanB2	chr3L	9615452	9615792	115.919	305
chr3L	9783892	9784590	699	-3.0543	9.66e-39	Ae2	chr3L	9784162	9784474	49.094	312
chr3L	10330547	10331203	657	-0.7571	0.0002981	FBgn0267668	chr3L	10330630	10331098	61.145	468
chr3L	10674964	10675209	246	-0.6753	0.0156	simj	chr3L	10674953	10675205	53.316	241
chr3L	10851426	10851793	368	-1.3761	3.78e-08	tna	chr3L	10851122	10851741	122.251	315
chr3L	10852358	10852722	365	-0.741	0.002815	tna	chr3L	10852402	10852939	64.01	320
chr3L	10857427	10857962	536	-0.8836	3.46e-06	tna	chr3L	10857361	10858054	123.21	535
chr3L	10858848	10858938	91	-0.831	0.01881	tna	chr3L	10858762	10859029	54.349	90
chr3L	10860093	10860556	464	-1.483	1.04e-15	tna	chr3L	10860077	10861205	122.542	463
chr3L	10860769	10861263	495	-3.0995	1.01e-40	tna	chr3L	10860077	10861205	122.542	436
chr3L	10861539	10861713	175	-1.8896	3.61e-09	tna	chr3L	10861427	10861739	43.969	174
chr3L	10862537	10863006	470	-2.2965	1.62e-29	tna	chr3L	10862581	10863541	120.88	425
chr3L	10863237	10863526	290	-1.3278	1.17e-06	tna	chr3L	10862581	10863541	120.88	289
chr3L	11236826	11237660	835	-2.4544	9.74e-50	Ir68a	chr3L	11237014	11237643	210.766	629
chr3L	11243302	11243760	459	-1.6946	1.64e-22	NA	chr3L	11243278	11243708	136.077	406
chr3L	11324987	11325250	264	-0.9848	0.005883	FBgn0265932	chr3L	11324660	11325218	41.906	231
chr3L	11343547	11343731	185	-1.3491	0.0002156	NA	chr3L	11343430	11344250	71.31	184
chr3L	11343800	11344285	486	-1.3446	3.64e-07	NA	chr3L	11343430	11344250	71.31	450
chr3L	11344518	11345147	630	-1.4117	8.51e-10	NA	chr3L	11344445	11345206	83.797	629
chr3L	11356816	11357590	775	-1.3431	1.93e-09	NA	chr3L	11356989	11357330	83.696	341
chr3L	11692801	11693482	682	-2.8144	3.82e-61	Pldn	chr3L	11692803	11693349	165.46	546
chr3L	11925059	11926107	1049	-1.3783	1.18e-14	byn	chr3L	11925308	11925816	128.15	508
chr3L	11927250	11927884	635	-1.1965	1.56e-11	byn	chr3L	11927245	11927732	247.438	482
chr3L	12649088	12649753	666	-1.8781	2.5e-21	FBgn0263379	chr3L	12649160	12649744	49.566	584
chr3L	13378012	13379109	1098	-1.2541	2.09e-20	SNCF	chr3L	13378171	13378884	253.711	713
chr3L	13408376	13408806	431	-1.7199	3.66e-18	NA	chr3L	13408480	13408895	41.511	326
chr3L	13408945	13409255	311	-2.012	2.68e-18	NA	chr3L	13409034	13409231	42.562	197
chr3L	13837372	13838009	638	-3.175	3.02e-63	CG43184	chr3L	13837349	13837931	130.961	559
chr3L	13904616	13904911	296	-1.2428	1.42e-05	dysc	chr3L	13904562	13904690	42.073	74
chr3L	13925169	13925659	491	-1.9359	3.35e-27	Rgl	chr3L	13925230	13925604	53.191	374
chr3L	14076520	14077090	571	-1.6647	1.63e-18	btl	chr3L	14076527	14077198	112.072	563
chr3L	14149778	14150599	822	-1.0138	1.12e-13	NA	chr3L	14149904	14150592	157.023	688
chr3L	14153516	14154149	634	-1.0787	8.75e-10	NA	chr3L	14153106	14154199	120.88	633
chr3L	14173051	14173701	651	-0.6407	0.003524	NA	chr3L	14173155	14173748	153.314	546
[truncated: 432 more rows]

## Sheet: DA wo ZLD NC14 12min
ATAC-seq (wt vs. zld- DA)
[truncated: 2,783 more rows]

[truncated: 2 more sheets: nonDA w ZLD NC14 12min, nonDA wo ZLD NC14 12min]
