# Supplementary material for: CLAMP and Zelda function together to promote Drosophila zygotic genome activation
Source: eLife journal article supplement (doi:10.7554/elife.69937), 2021-08-03
Supplement: supp [file Figure 1 Sources Data Captions.docx]

Figure 1- Source Data

1. Western blot of CLAMP and reference control Actin in MTD, *clamp-i* and *zld-i* embryos in 0-2hr and 2-4hr embryos. MTD: MTD-Gal4 line. *clamp-i:* MTD-Gal4-*clamp* mRNAi line, *zld-i:* MTD-Gal4-*zld* mRNAi line.
2. Western blot of ZLD and reference control Actin in MTD, *clamp-i* and *zld-i* embryos in 0-2hr and 2-4hr embryos. MTD: MTD-Gal4 line. *clamp-i:* MTD-Gal4-*clamp* mRNAi line, *zld-i:* MTD-Gal4-*zld* mRNAi line.
3. Electrophoretic mobility shift assay (EMSA) showing the binding of increasing amounts of CLAMP DNA-binding domain (DBD) fused to MBP to 5C2 naked DNA or 5C2 *in vitro* reconstituted nucleosomes (NUC). Concentrations (uM) of CLAMP DBD increase from left to right.
4. EMSA showing the binding of increasing amounts of full-length (FL) CLAMP (fused to MBP) to 5C2 DNA or 5C2 nucleosomes (NUC). Concentrations (uM) of CLAMP FL increase from left to right.
