# Supplementary figures and images for: CLAMP and Zelda function together to promote Drosophila zygotic genome activation
Source: eLife journal article supplement (doi:10.7554/elife.69937), 2021-08-03

A

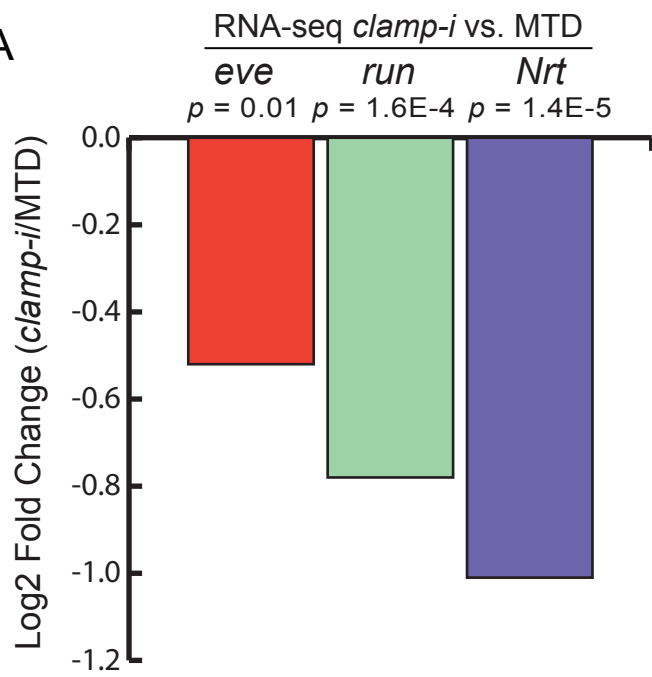

B

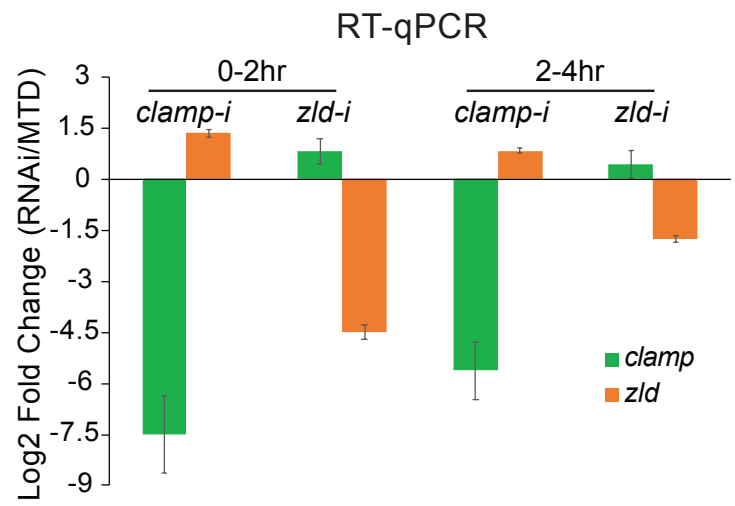

C

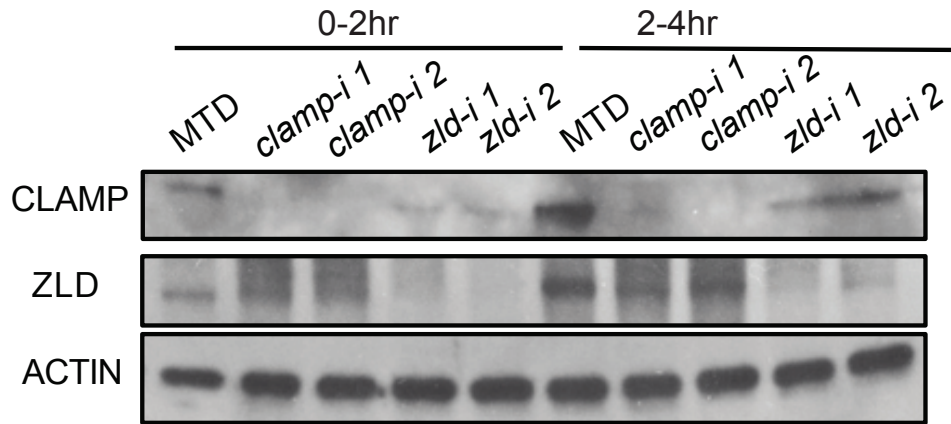

D

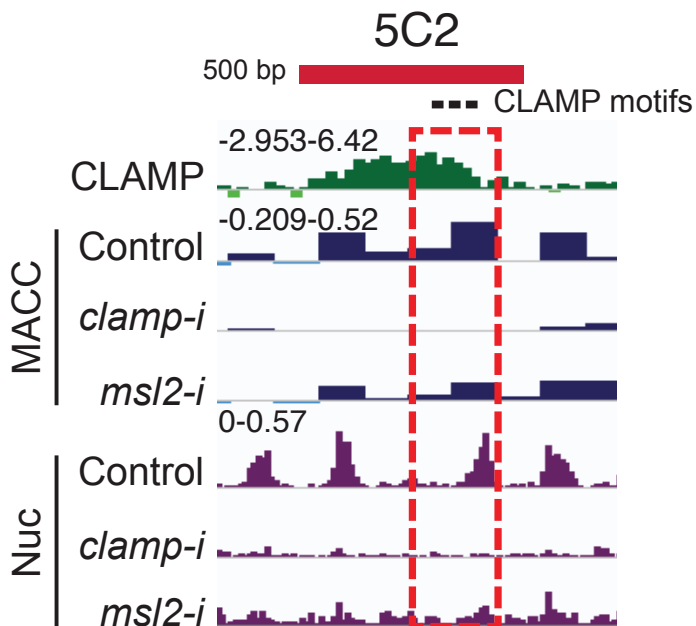

E

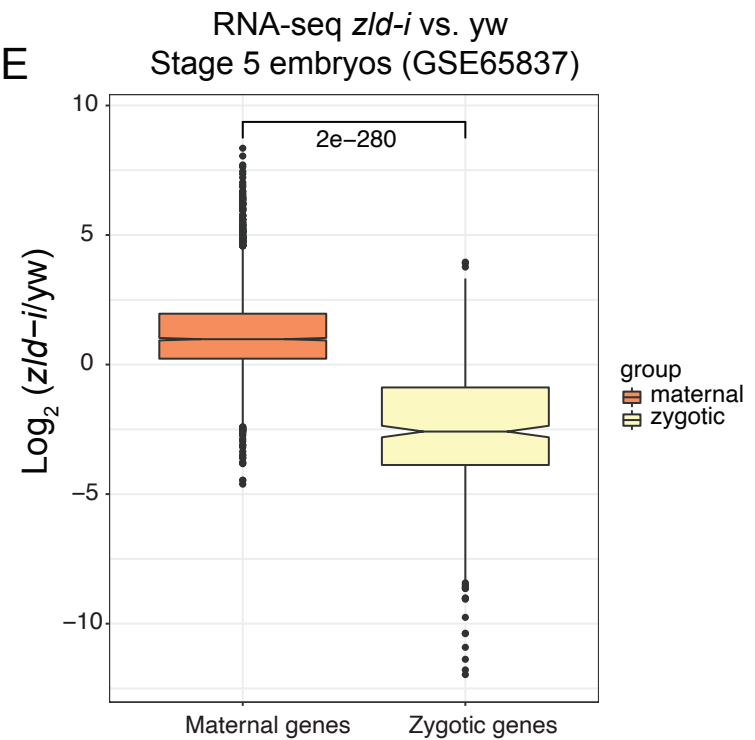

Supplement: supp [file elife-69937-supp-v1.zip › elife_poa_e69937_Figure_1_figure_supplement_1.pdf]

A

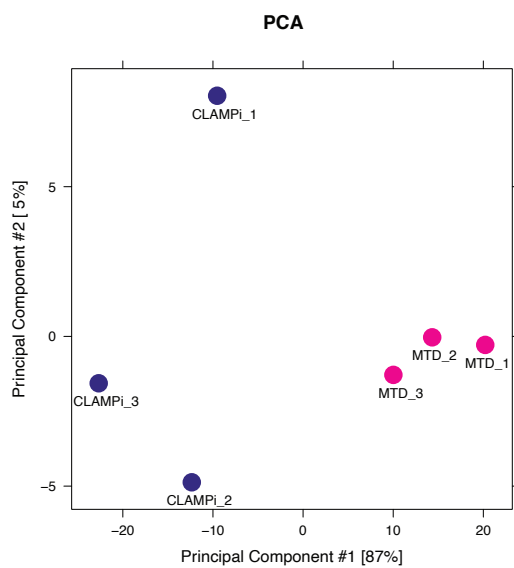

B

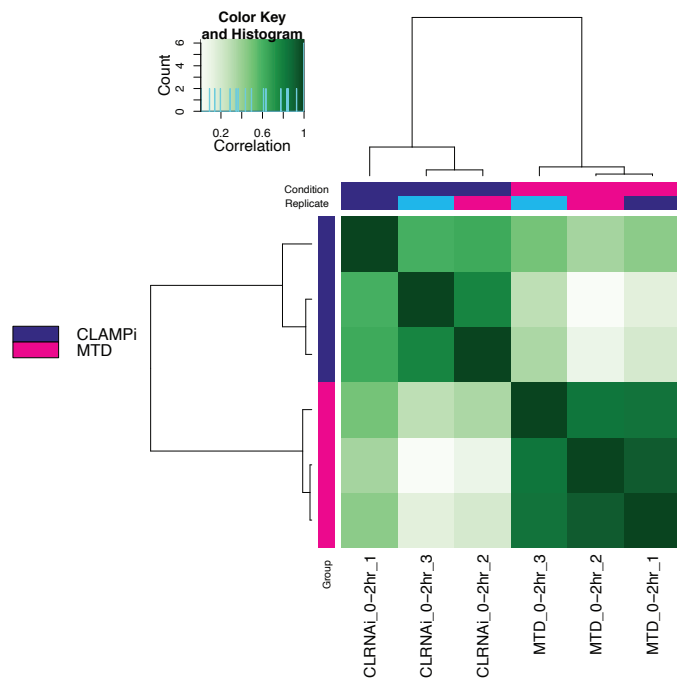

C

Fig.2-figure supplement 1

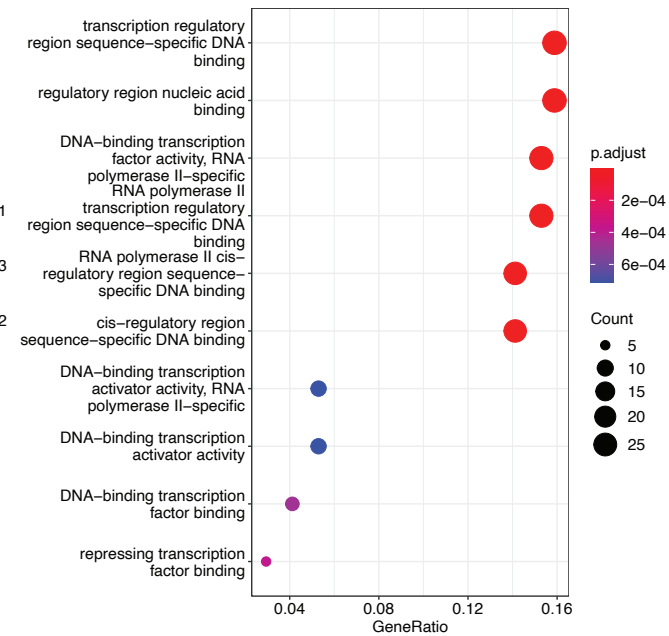

D

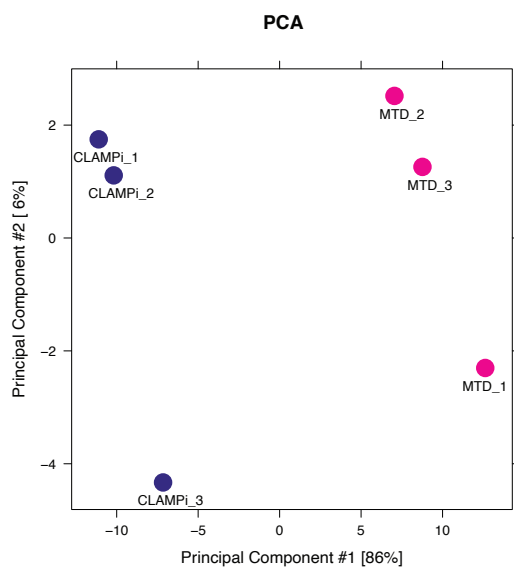

E

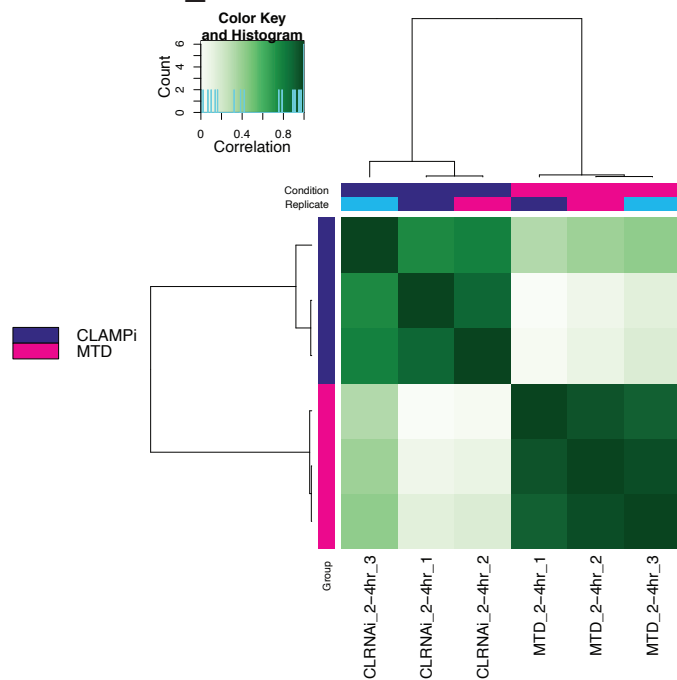

F

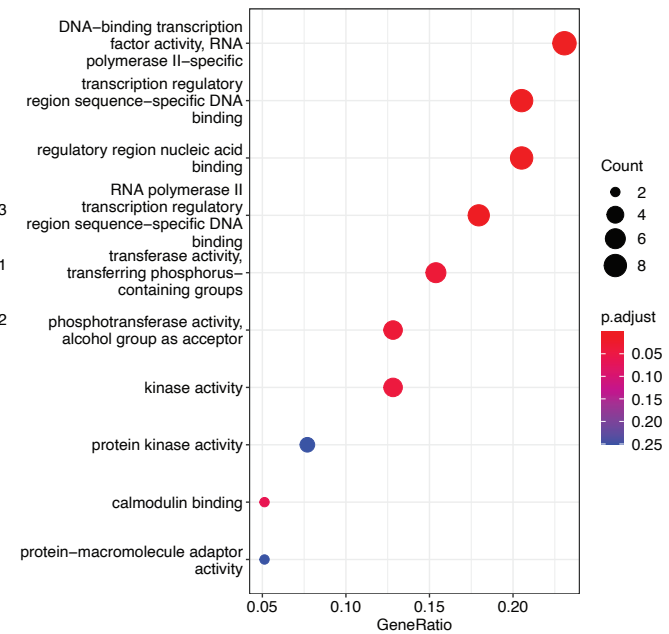

Supplement: supp [file elife-69937-supp-v1.zip › elife_poa_e69937_Figure_2_figure_supplement_1.pdf]

Fig.3-Figure supplement 1

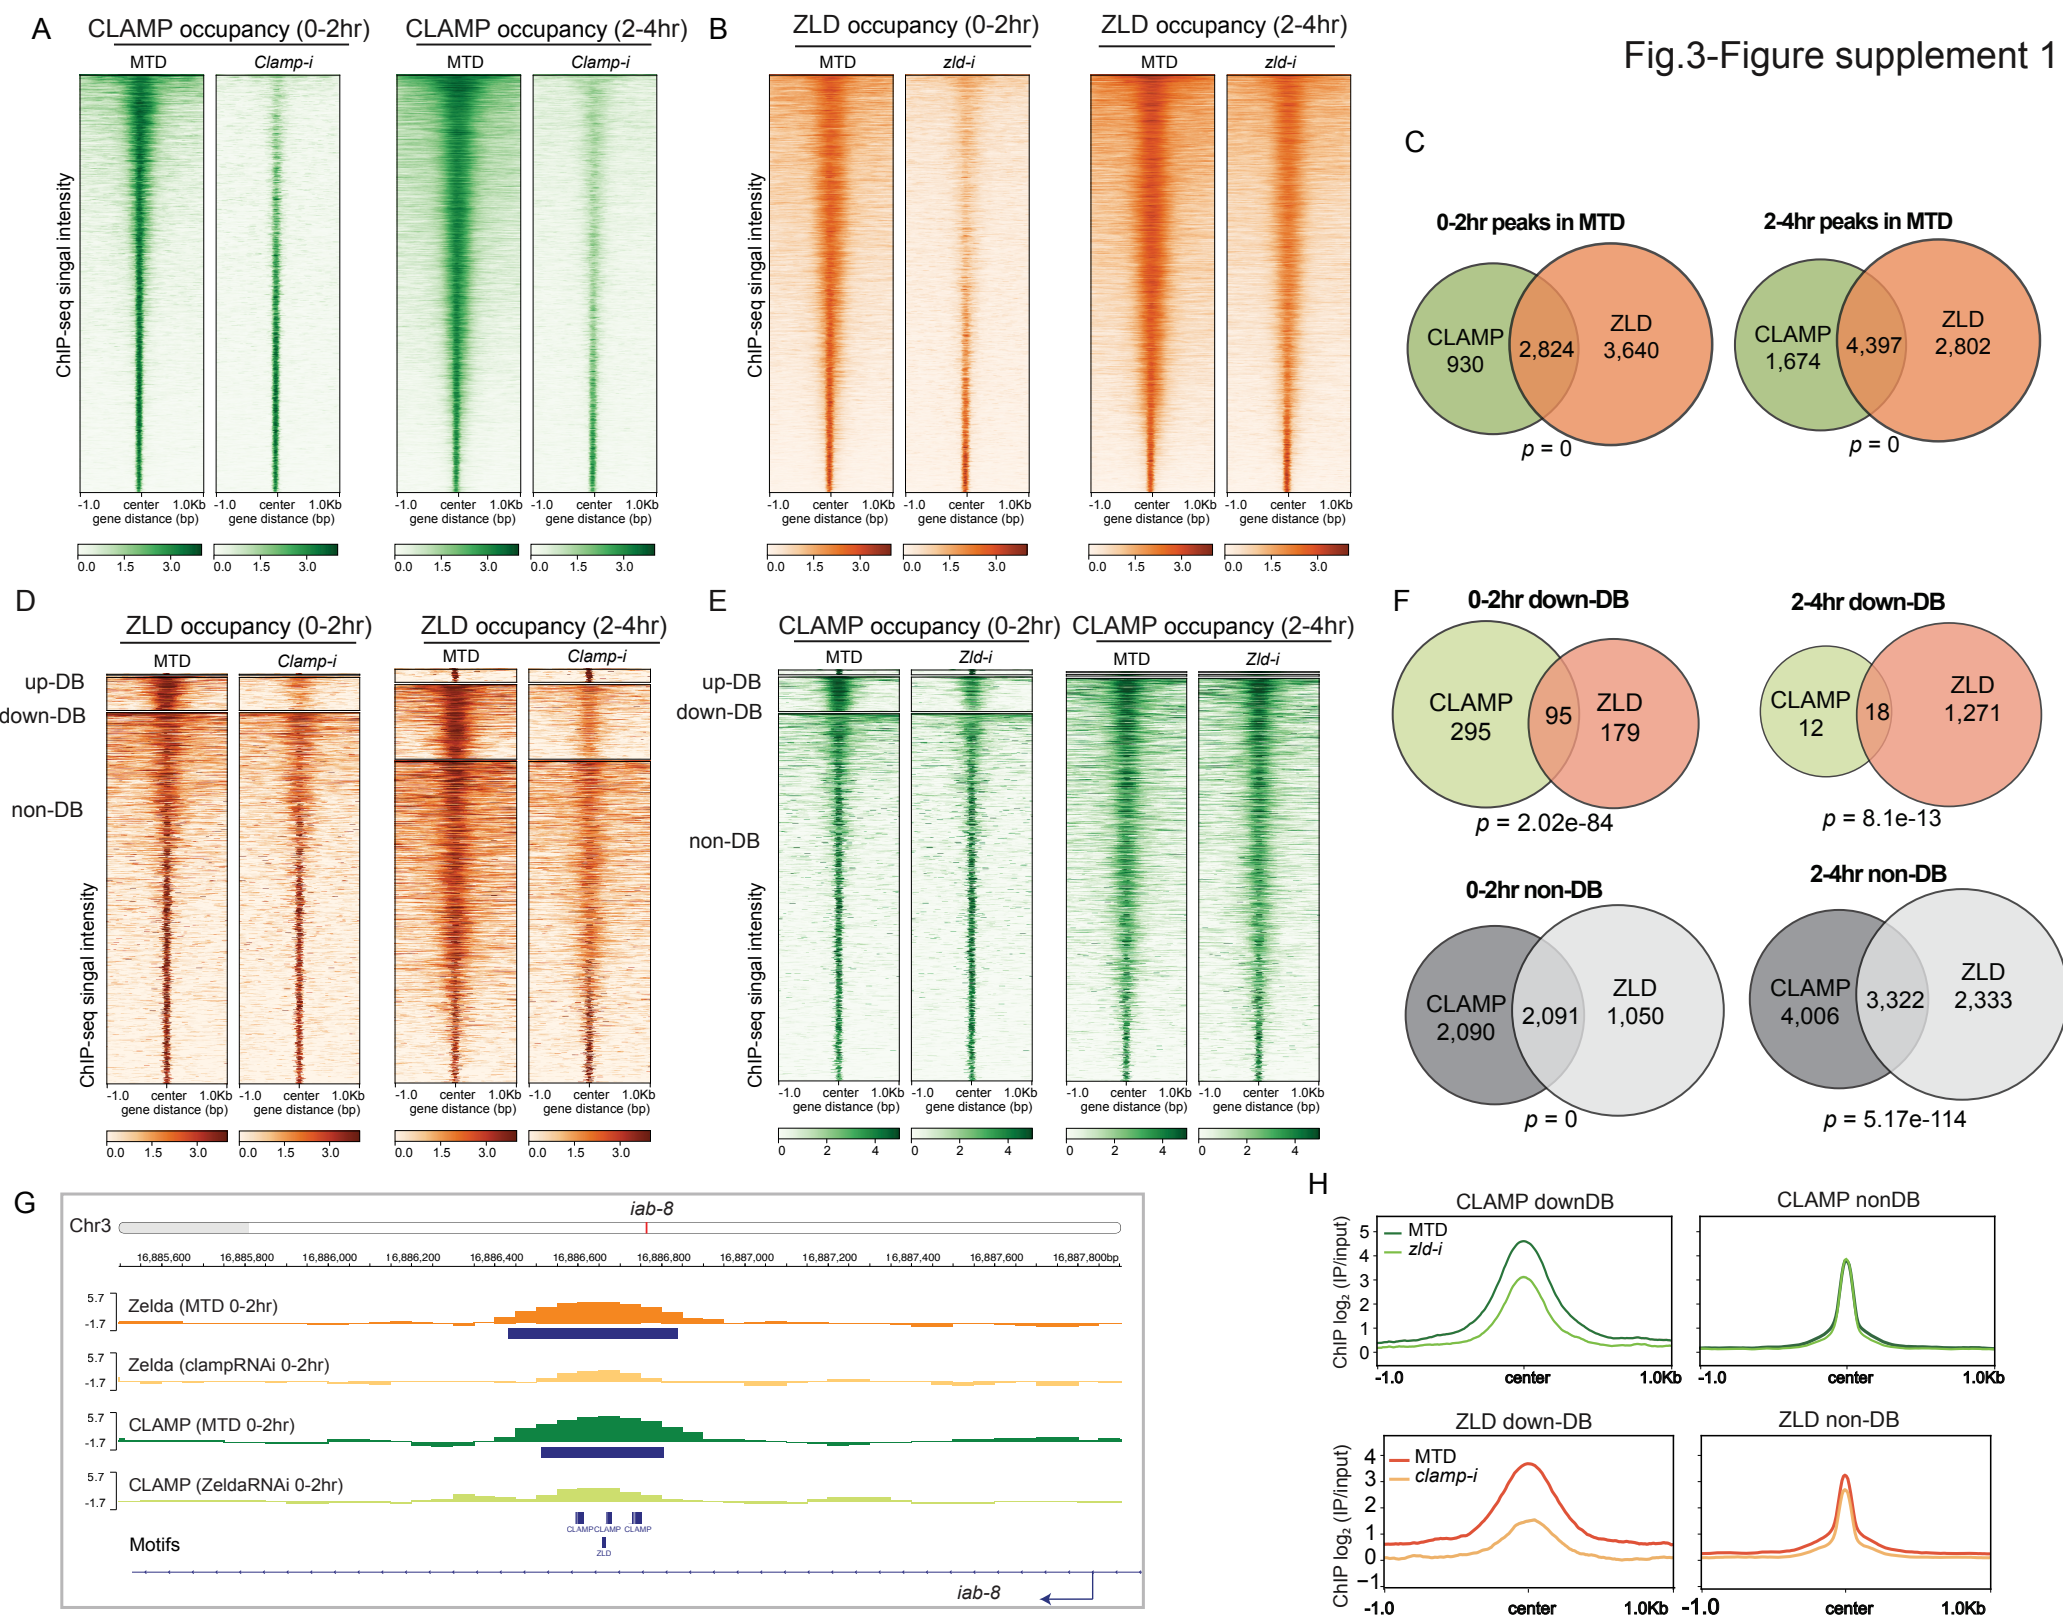

Supplement: supp [file elife-69937-supp-v1.zip › elife_poa_e69937_Figure_3_figure_supplement_1.pdf]

A

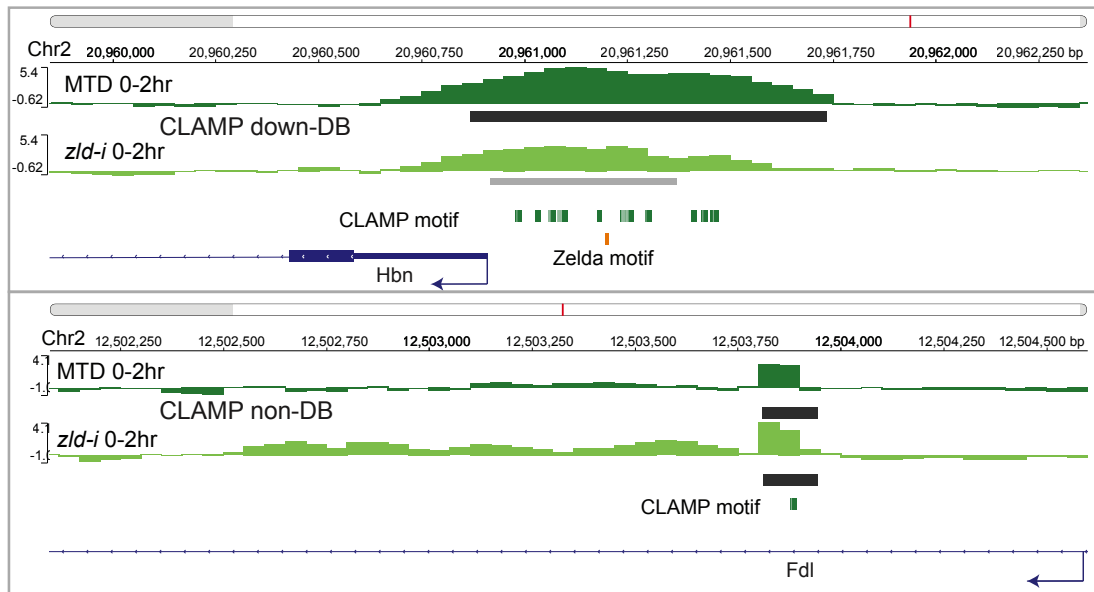

B

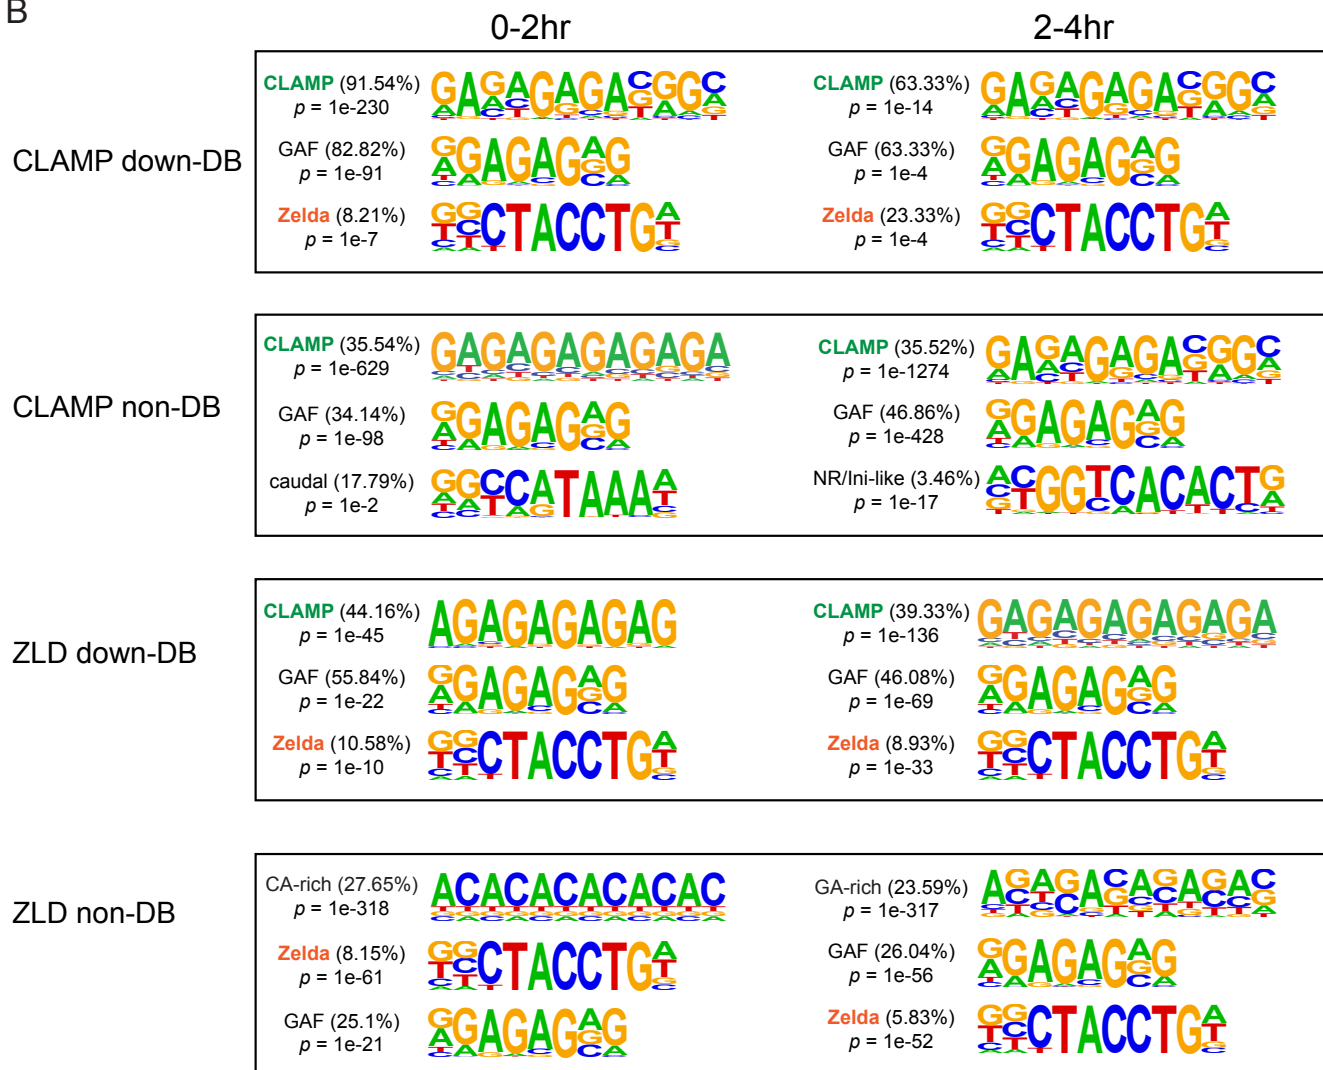

C

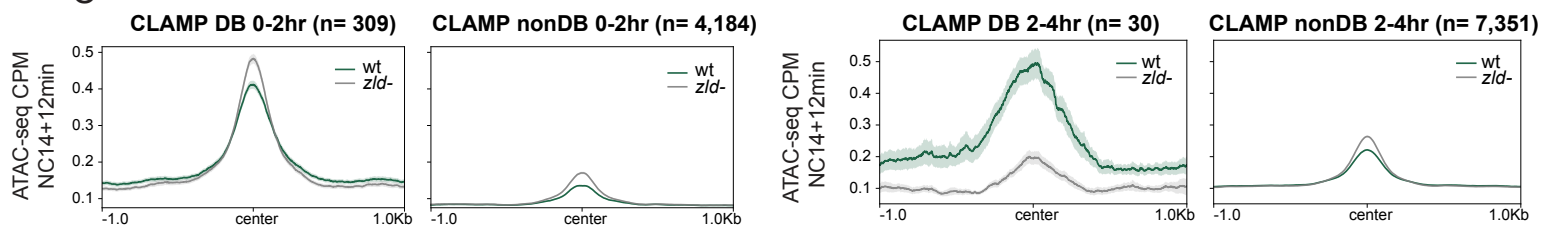

Supplement: supp [file elife-69937-supp-v1.zip › elife_poa_e69937_Figure_3_figure_supplement_2.pdf]

Fig.5 figure supplementary 1

A

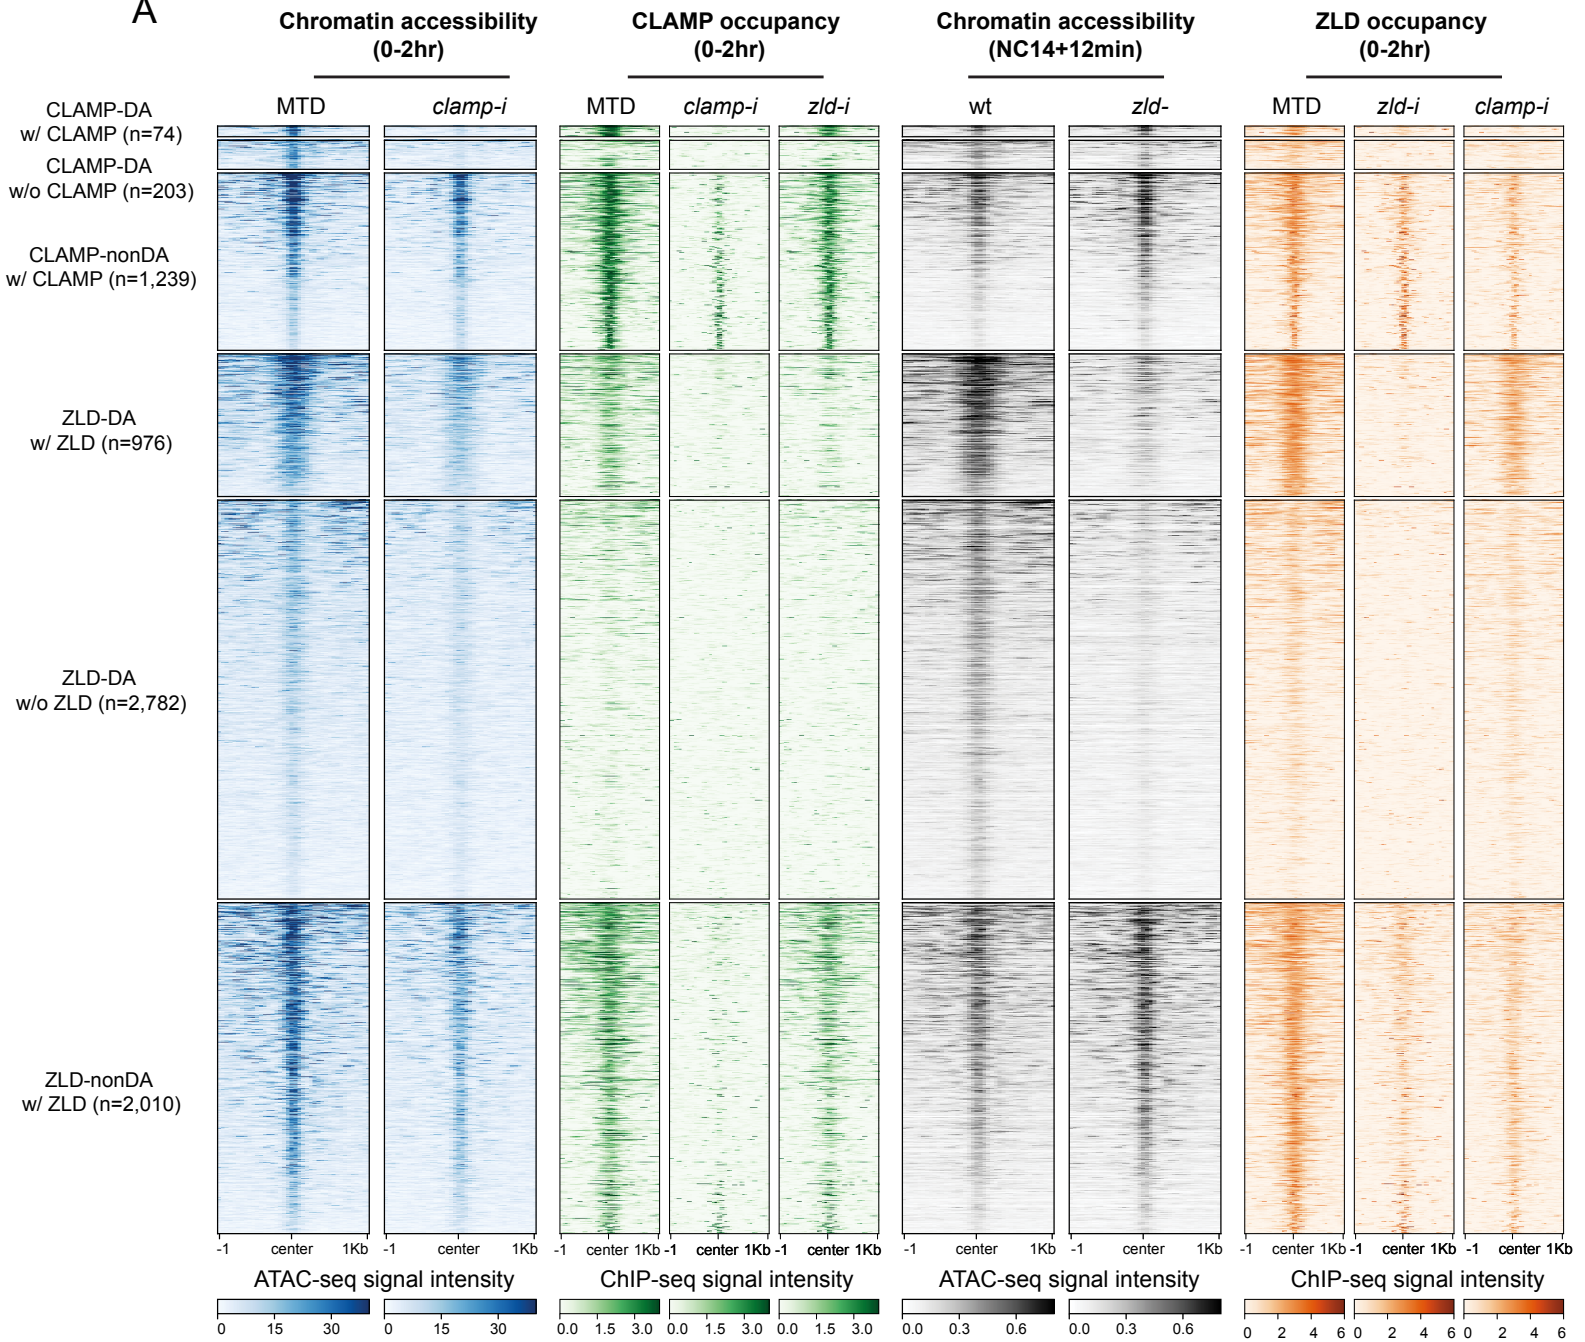

B

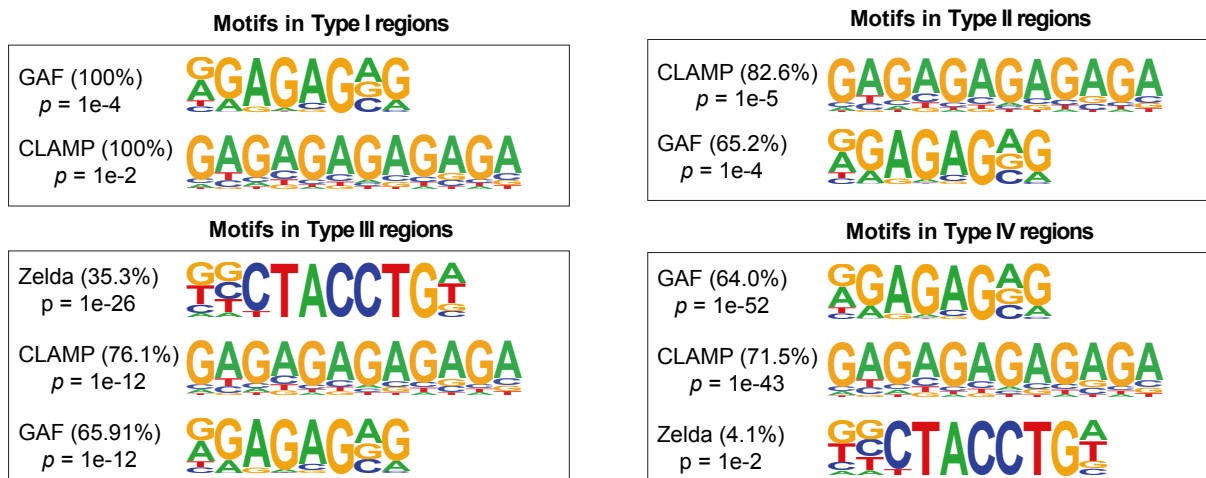

Supplement: supp [file elife-69937-supp-v1.zip › elife_poa_e69937_Figure_5_figure_supplement_1.pdf]
